# Supplementary material for: Methylation-Regulated Long Non-Coding RNA Expression in Ulcerative Colitis
Source: MDPI journal article supplement (doi:10.3390/ijms241310500), 2023-06-22

# AC004687.1

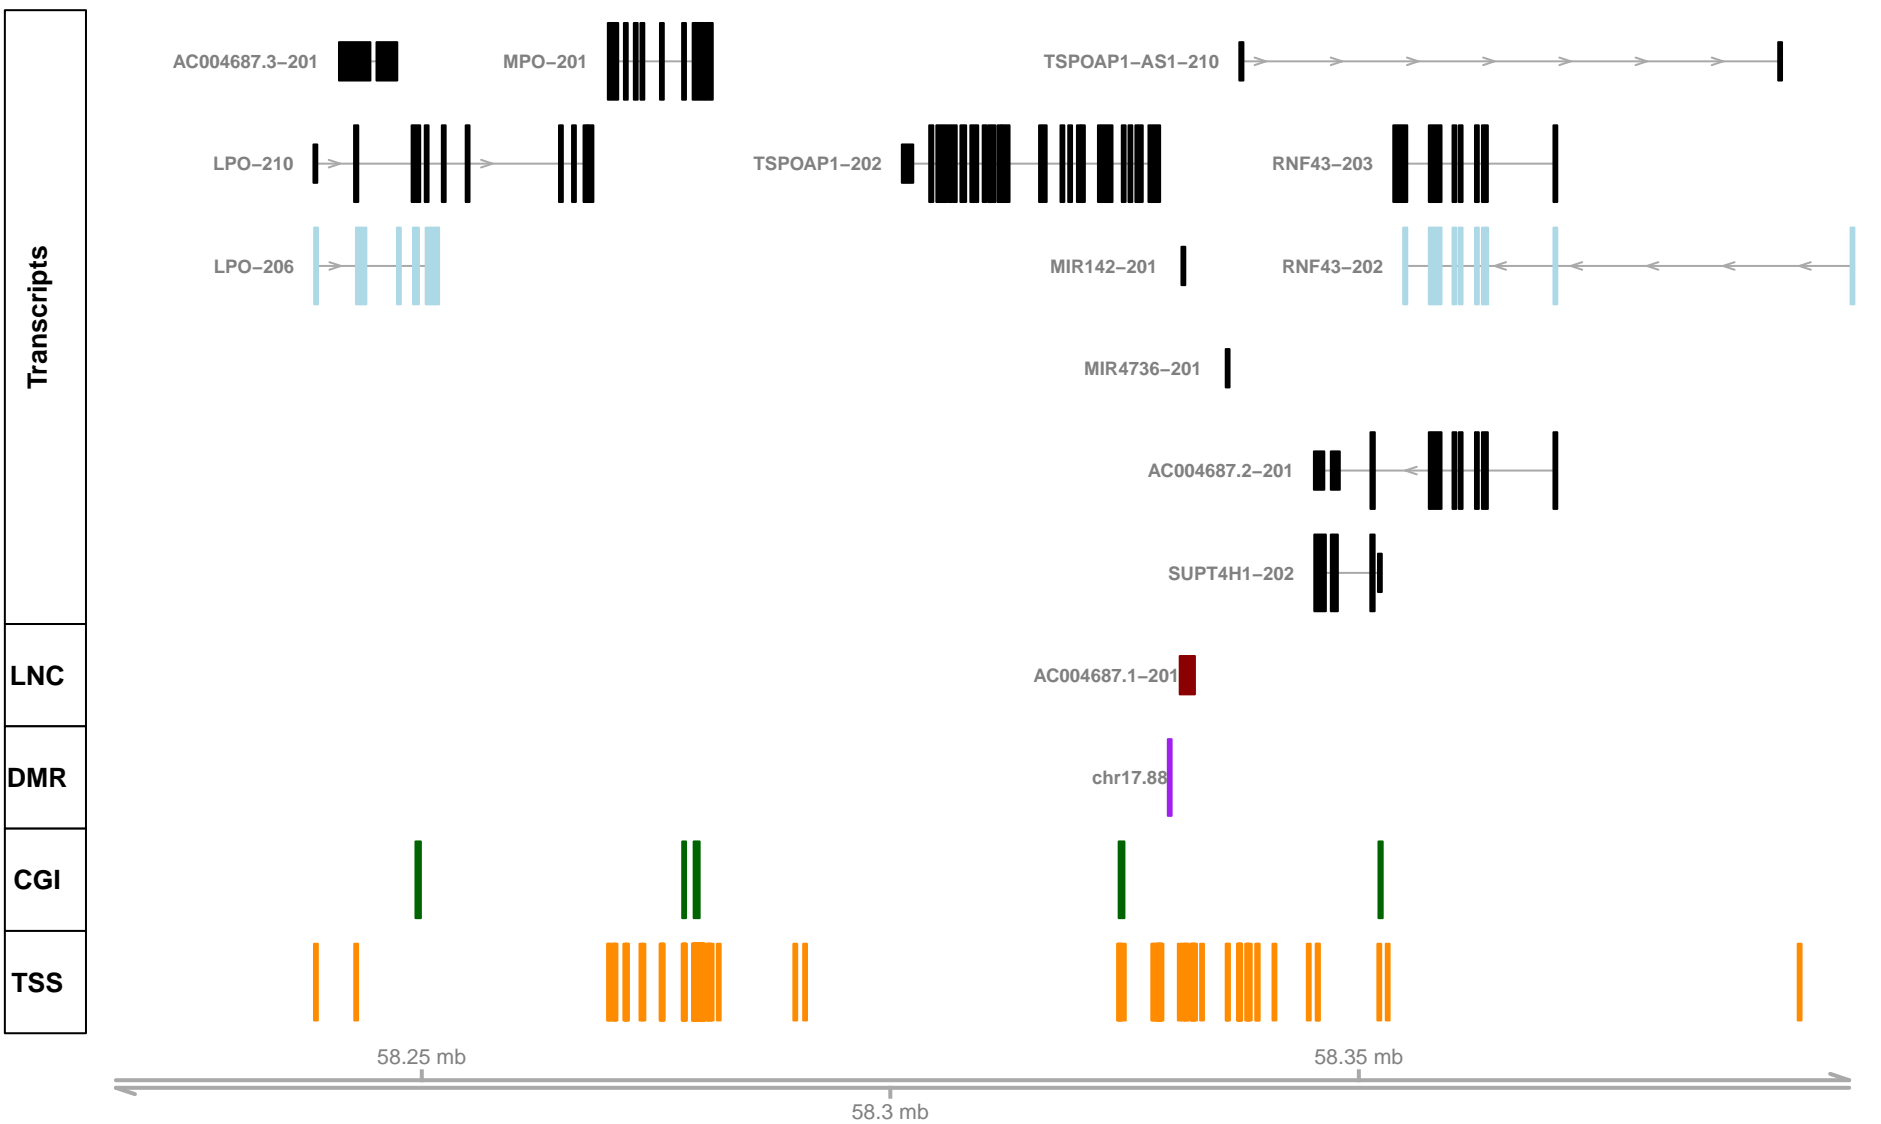

## chr17.88

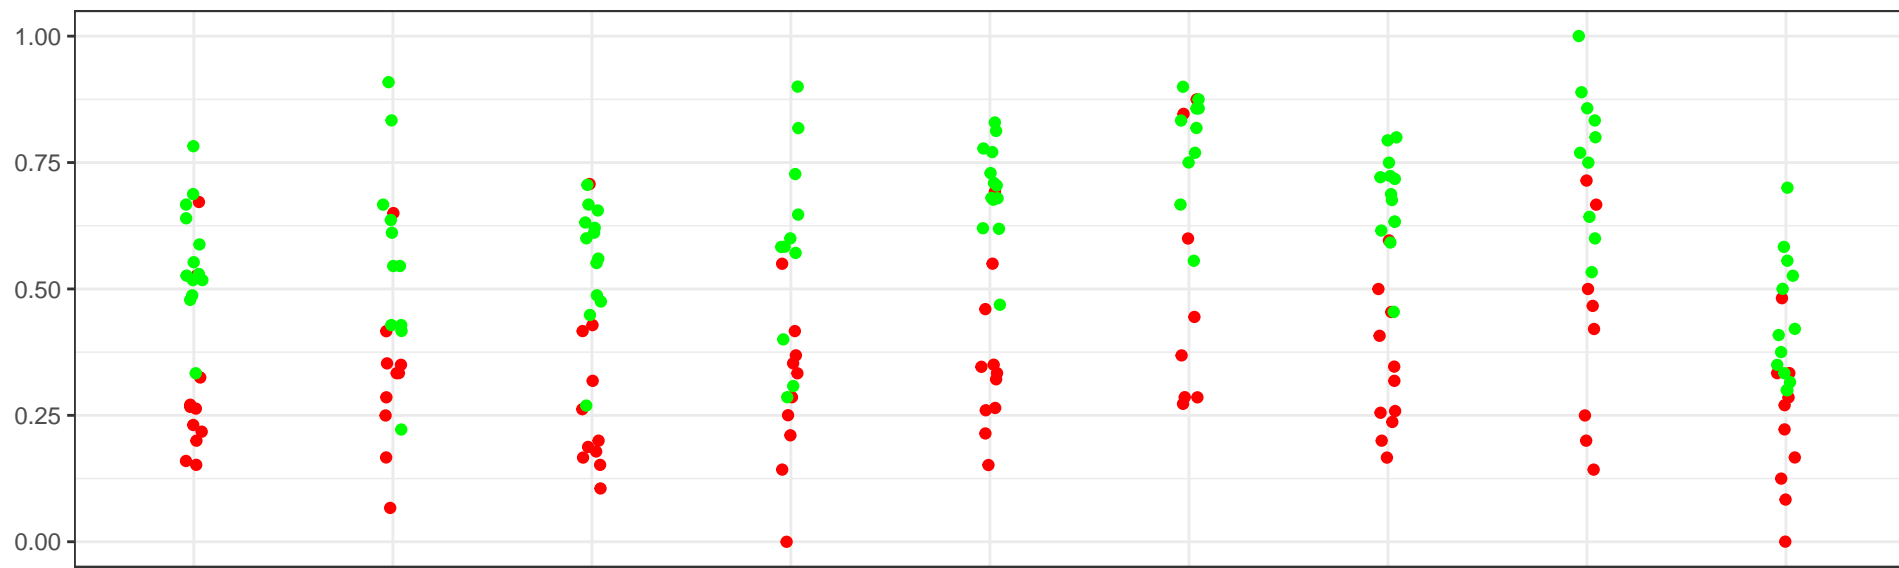

AC004847.1

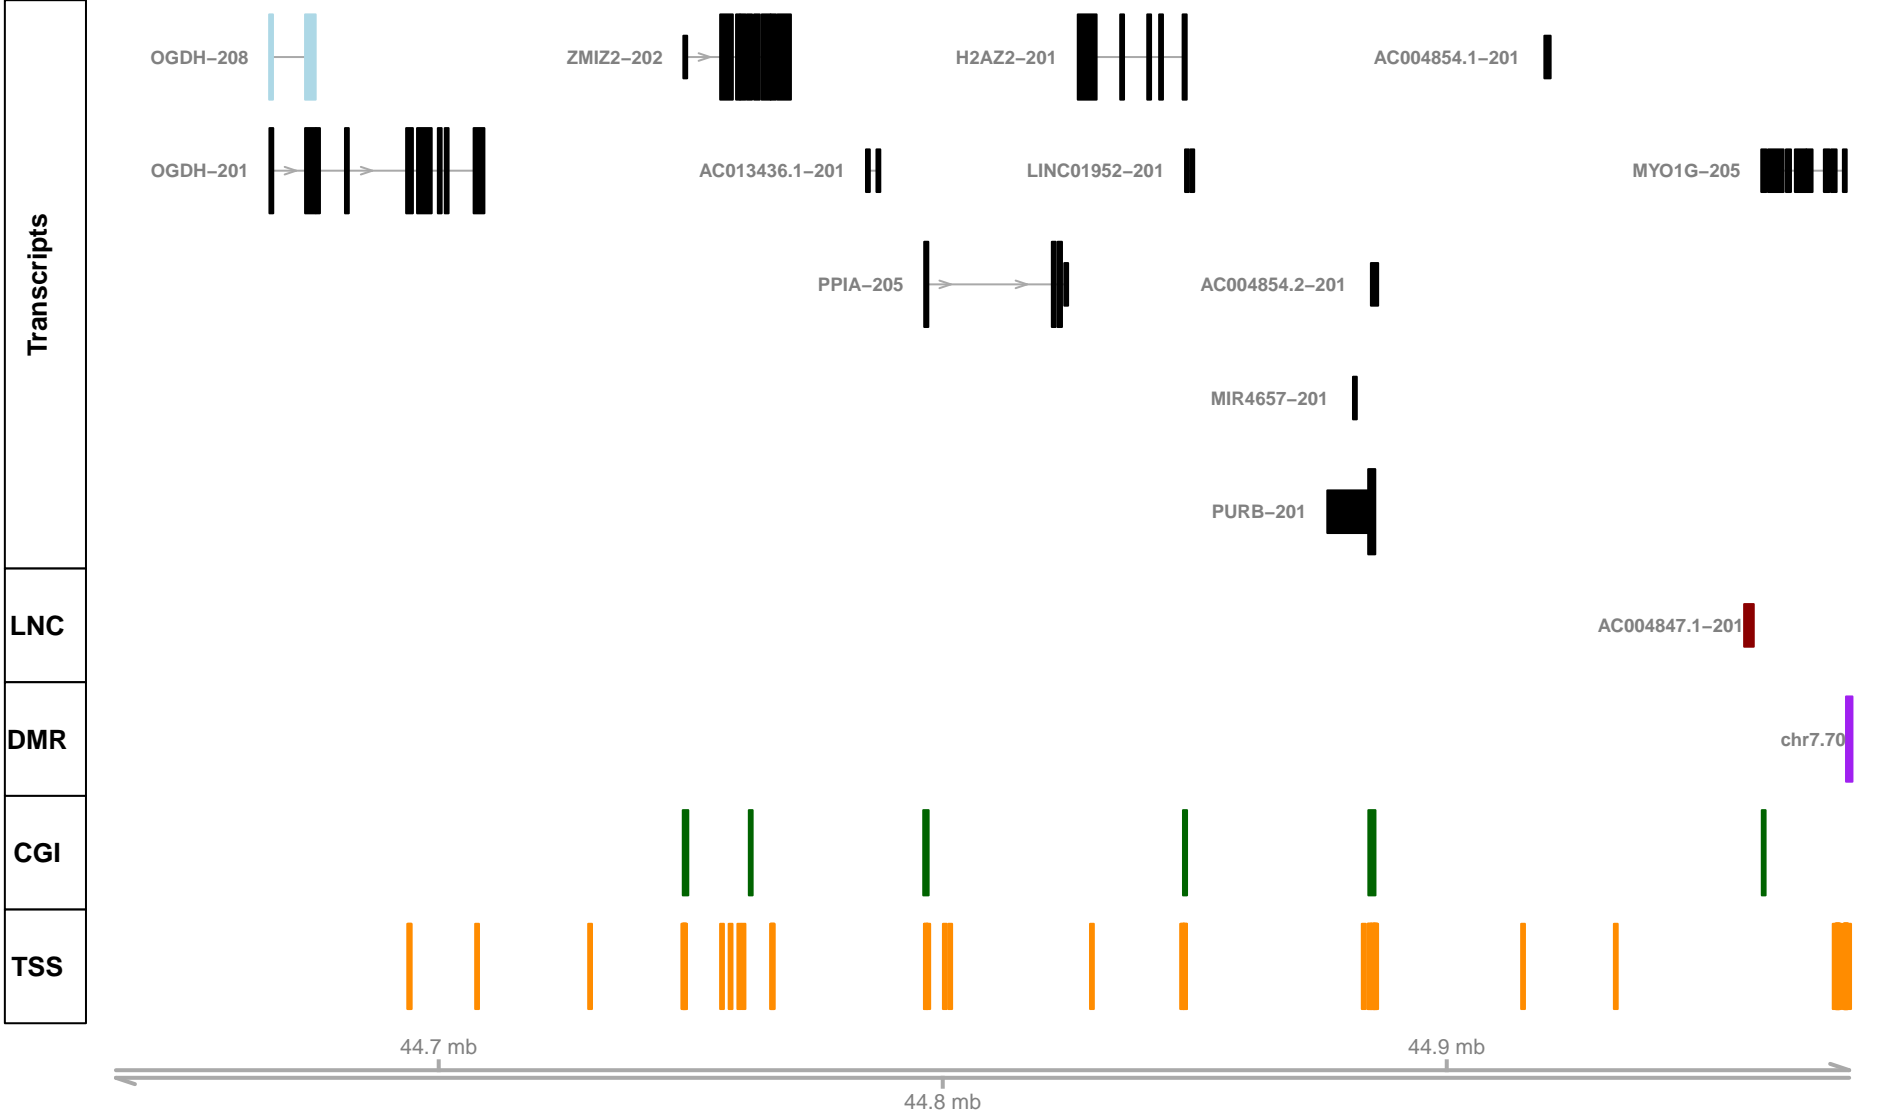

chr7.70

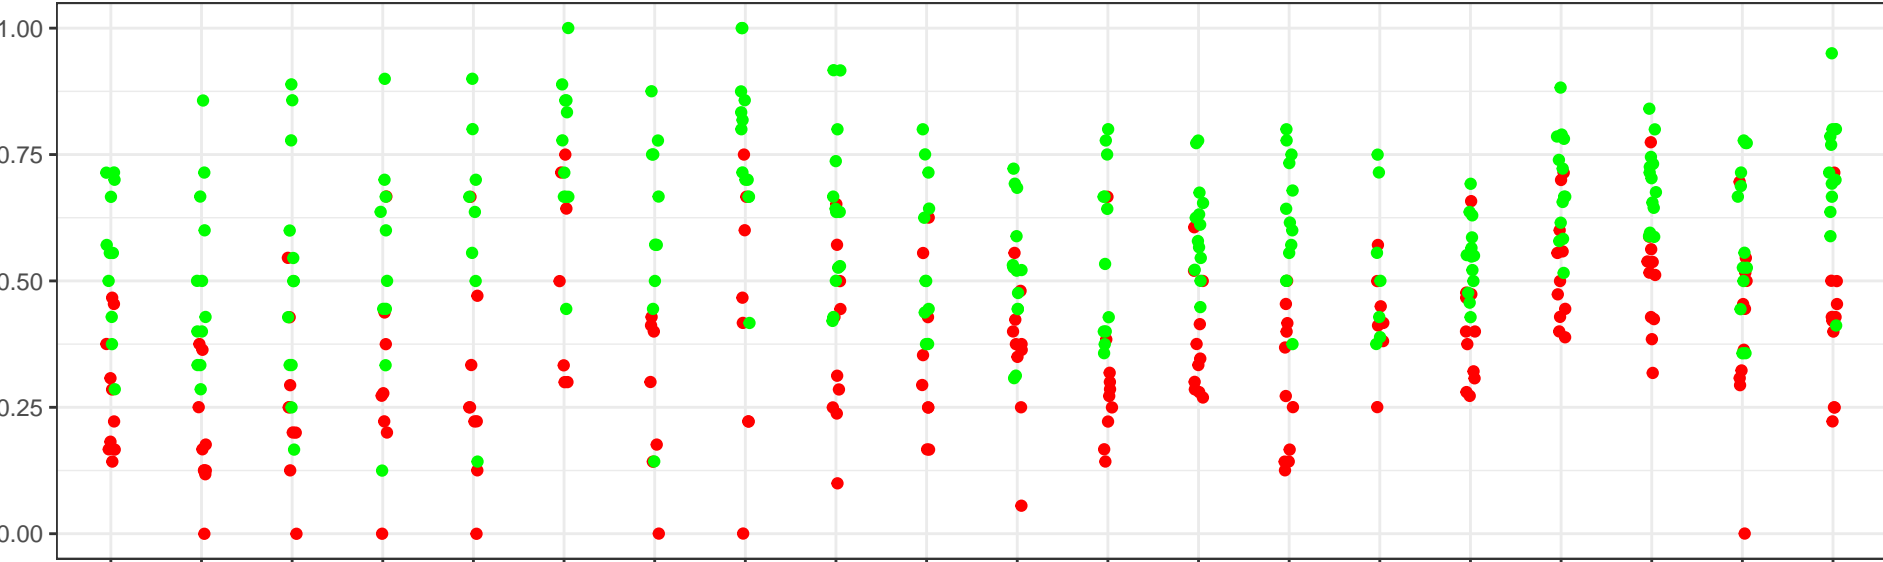

AC005165.1

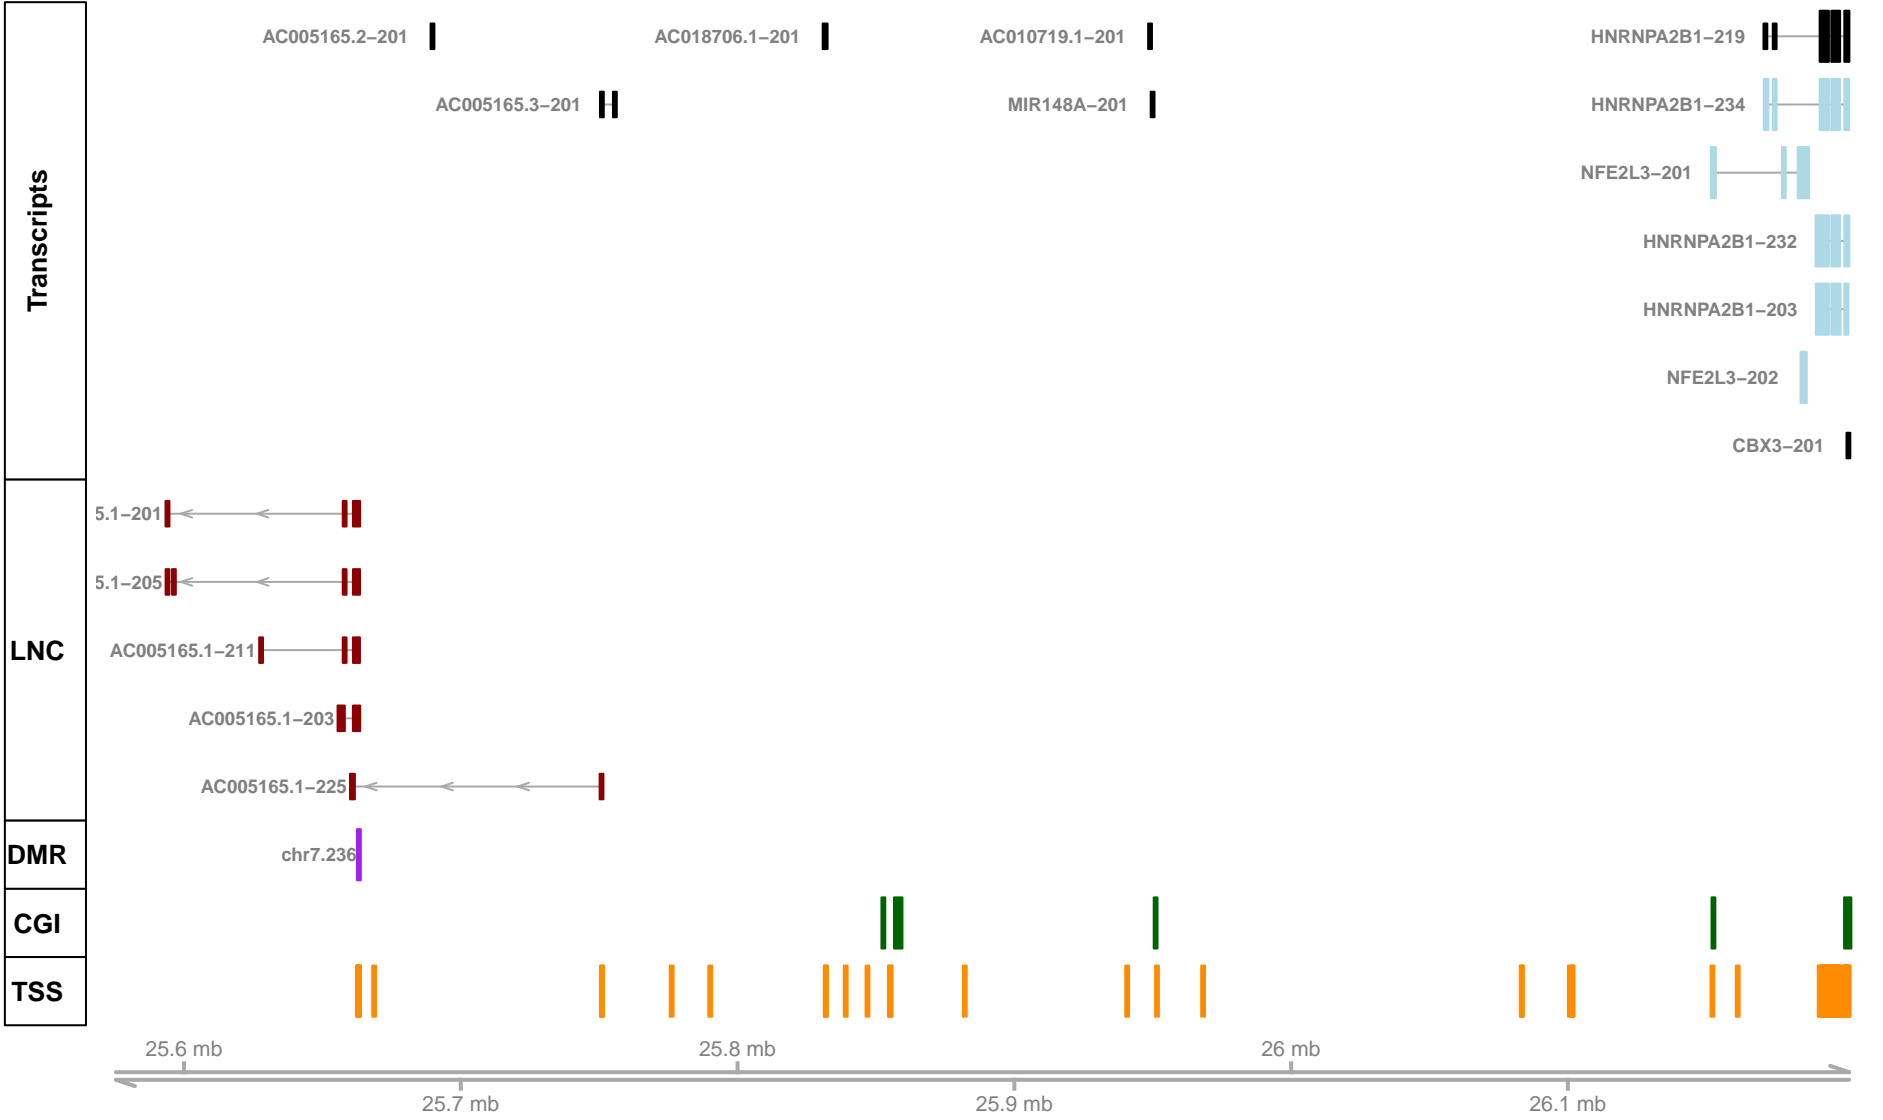

chr7.236

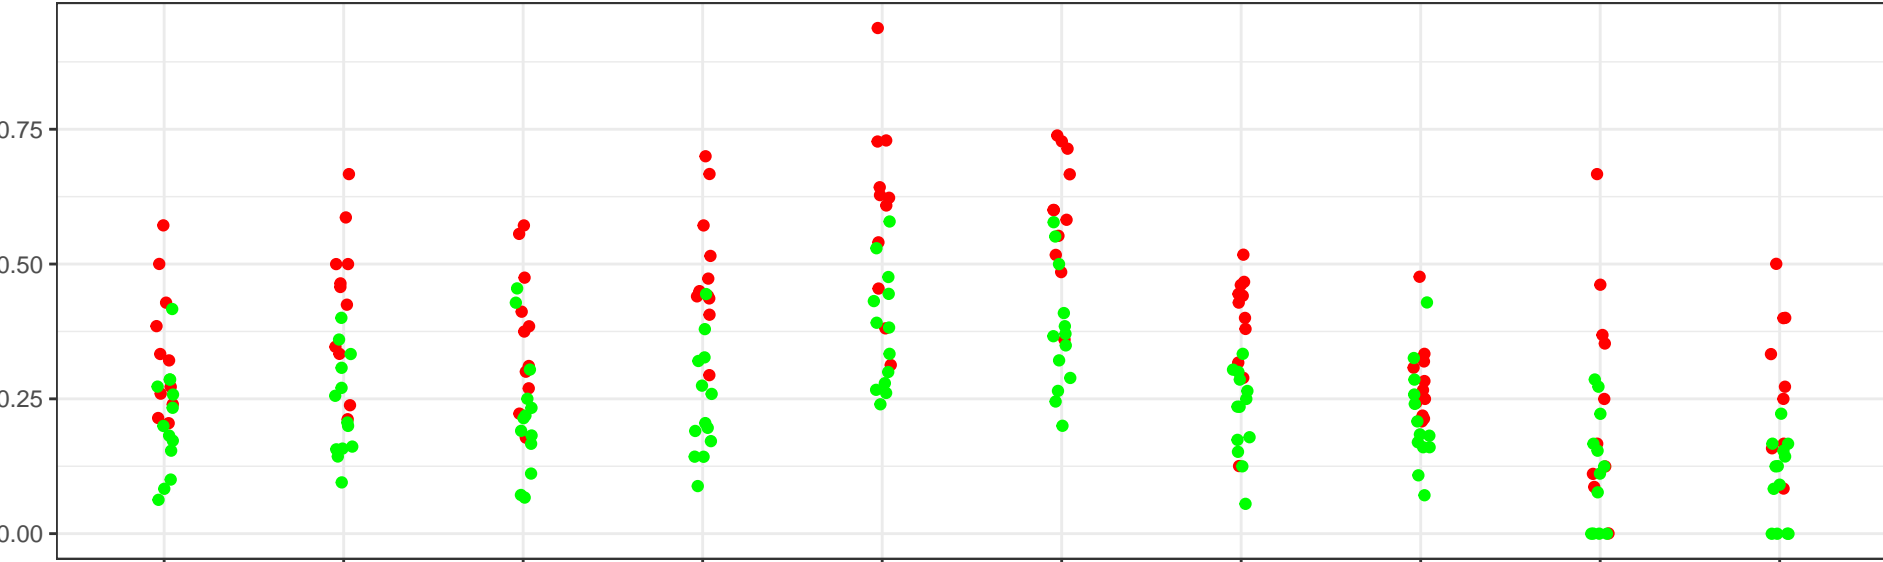

AC005391.1

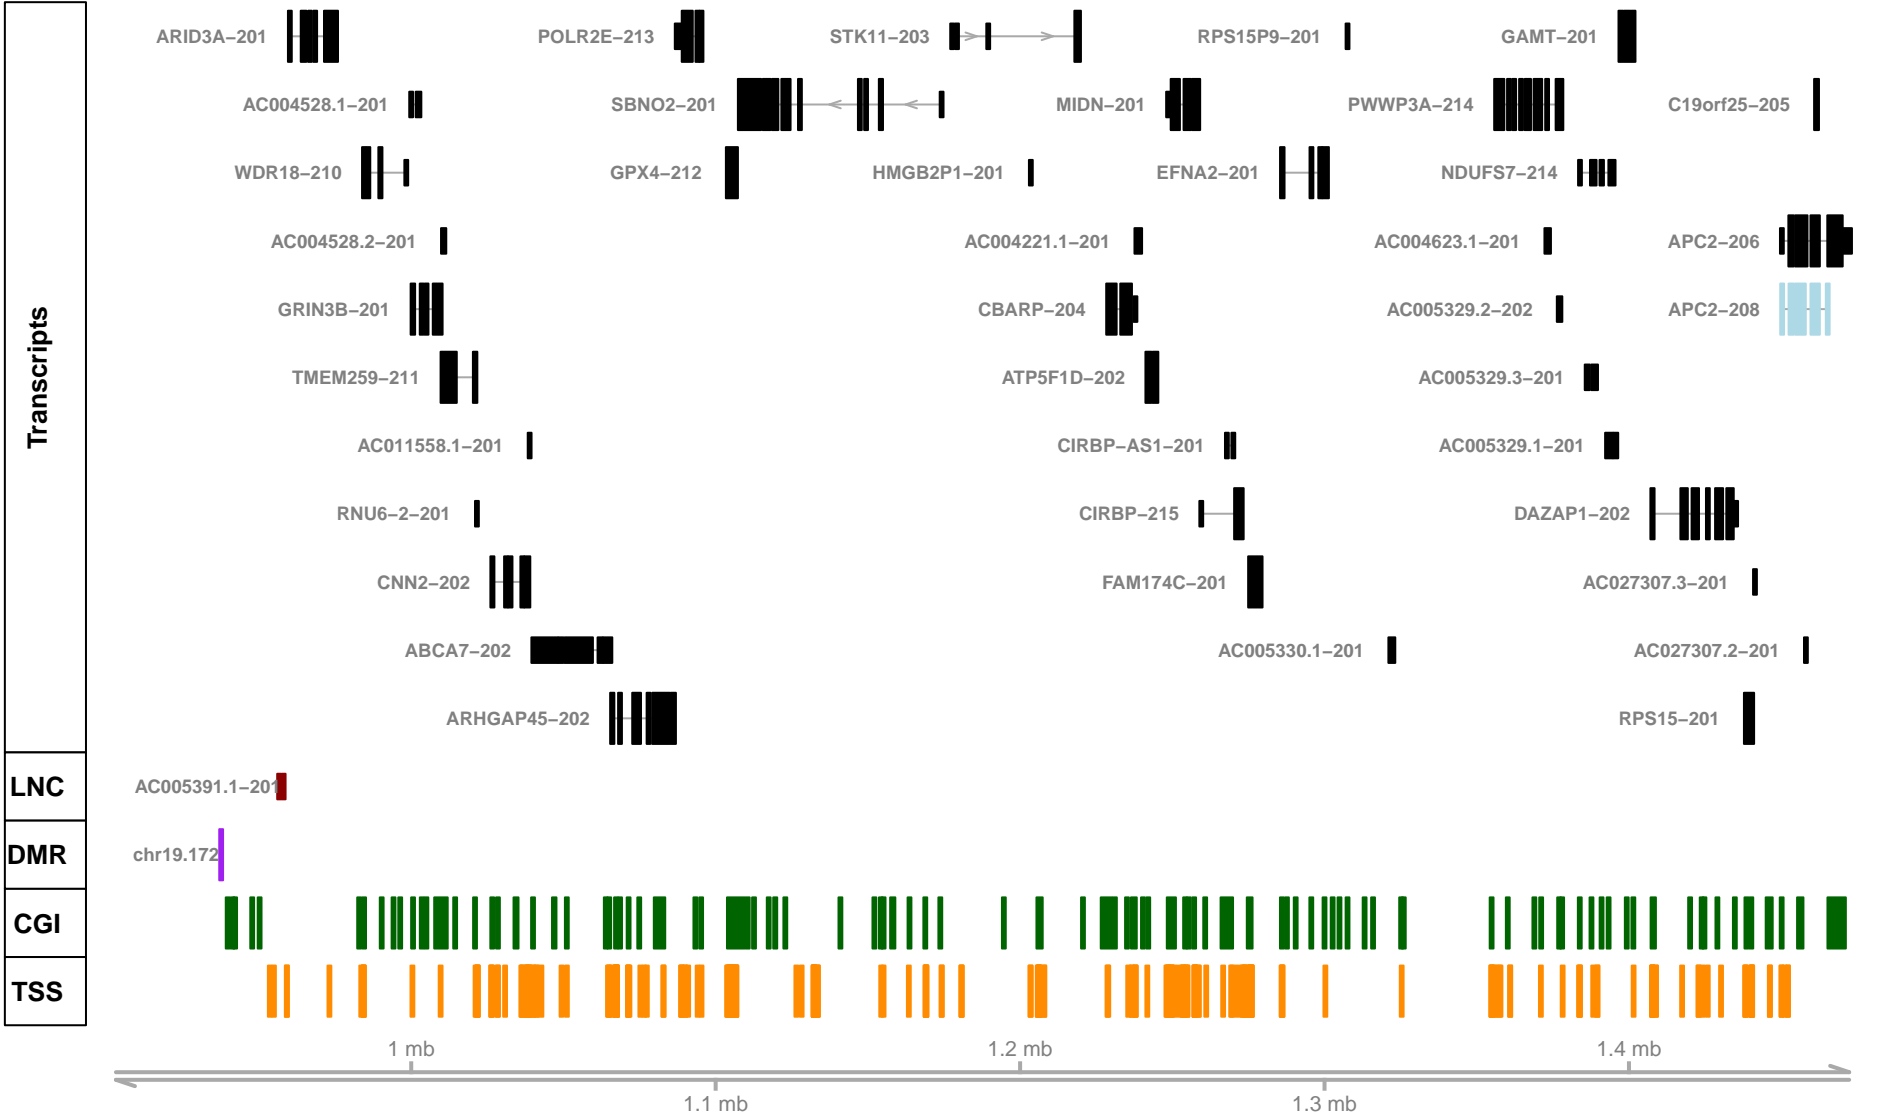

chr19.172

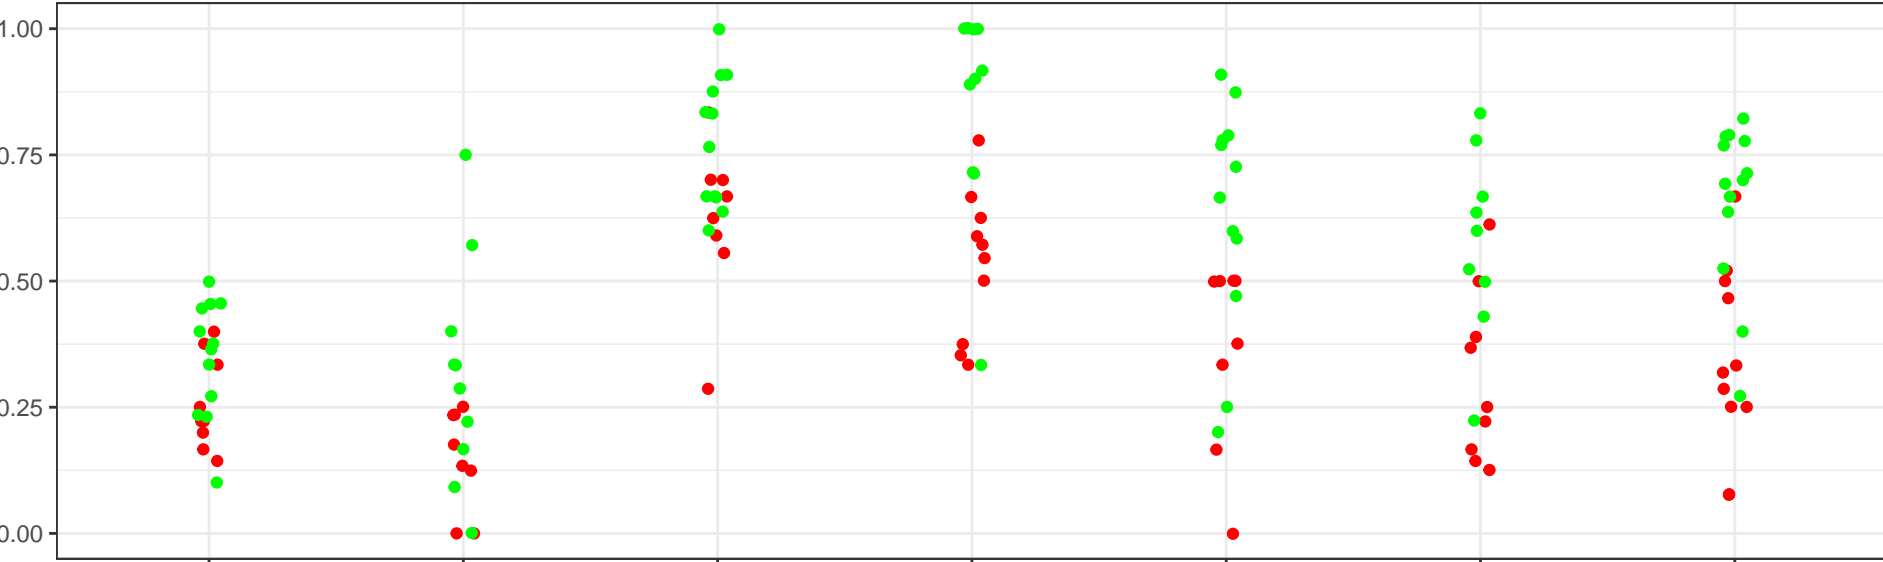

AC007278.1

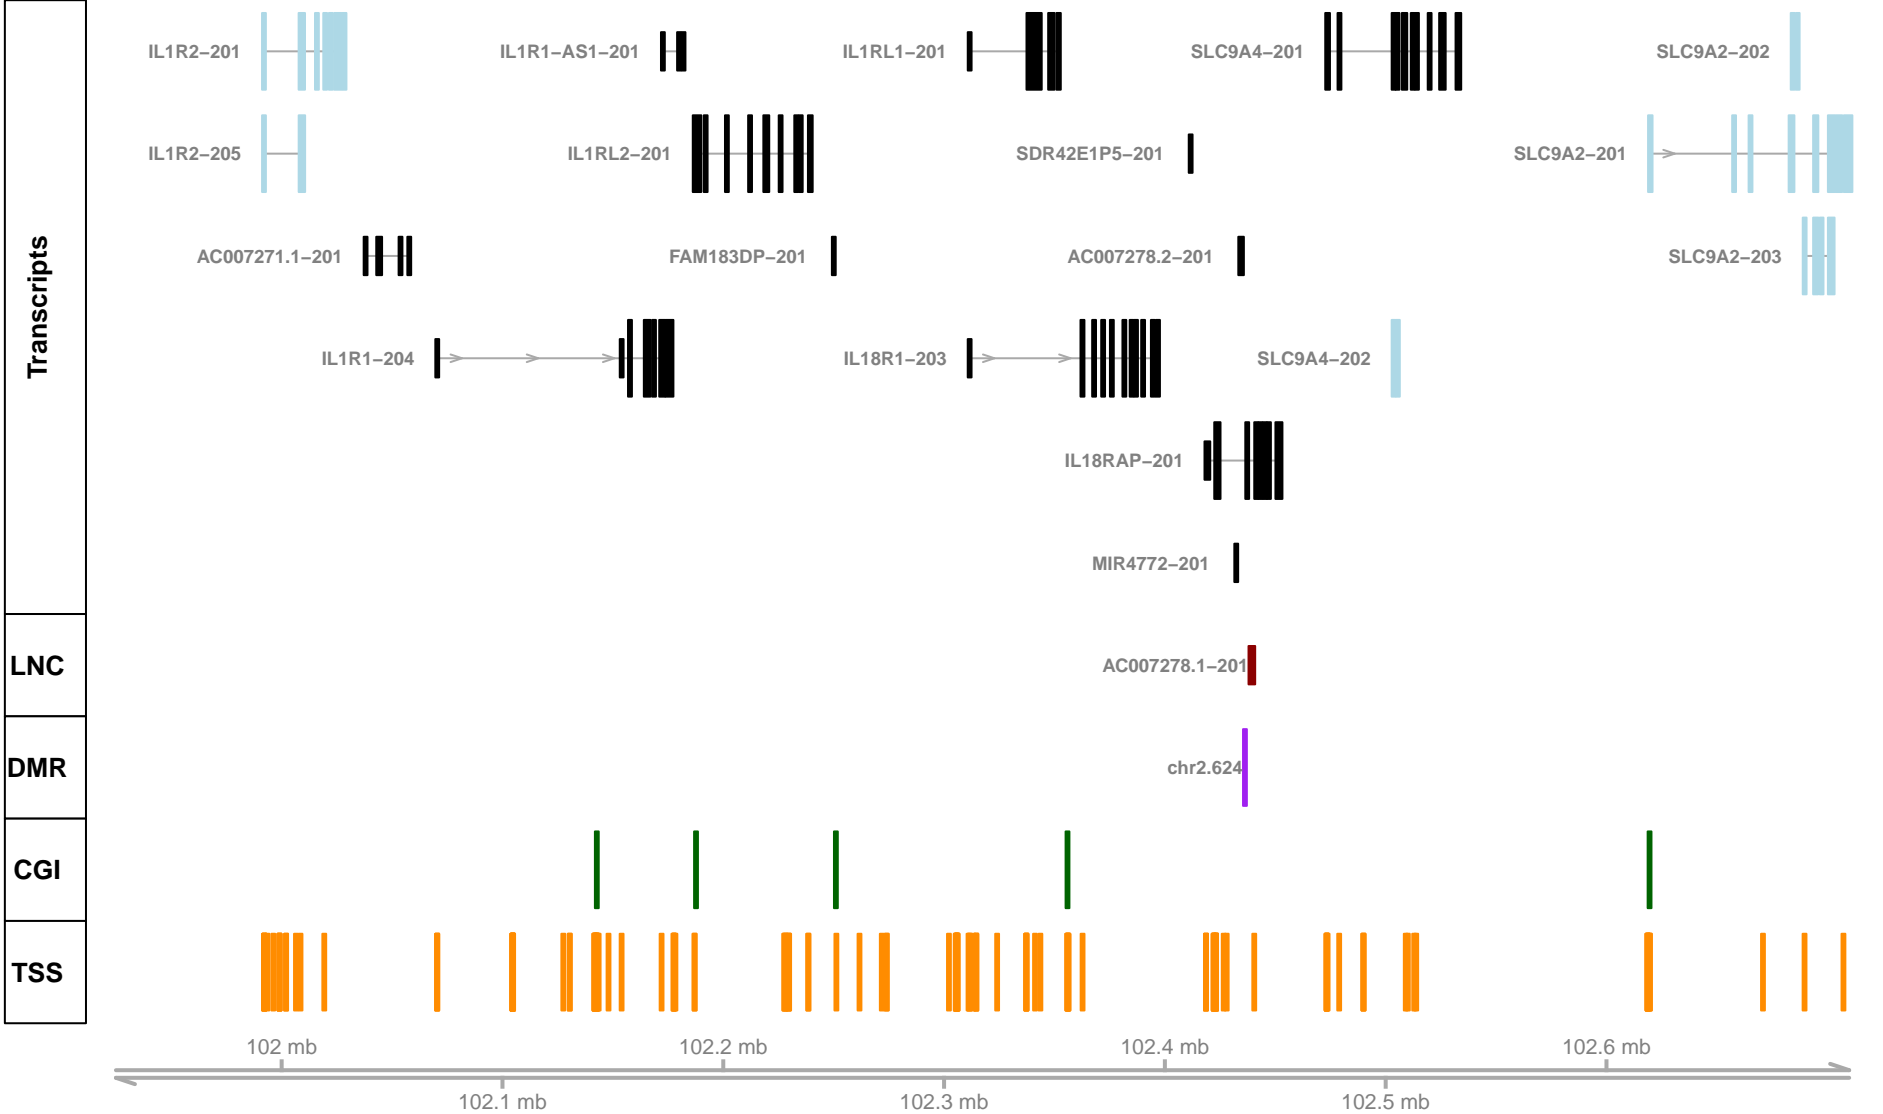

chr2.624

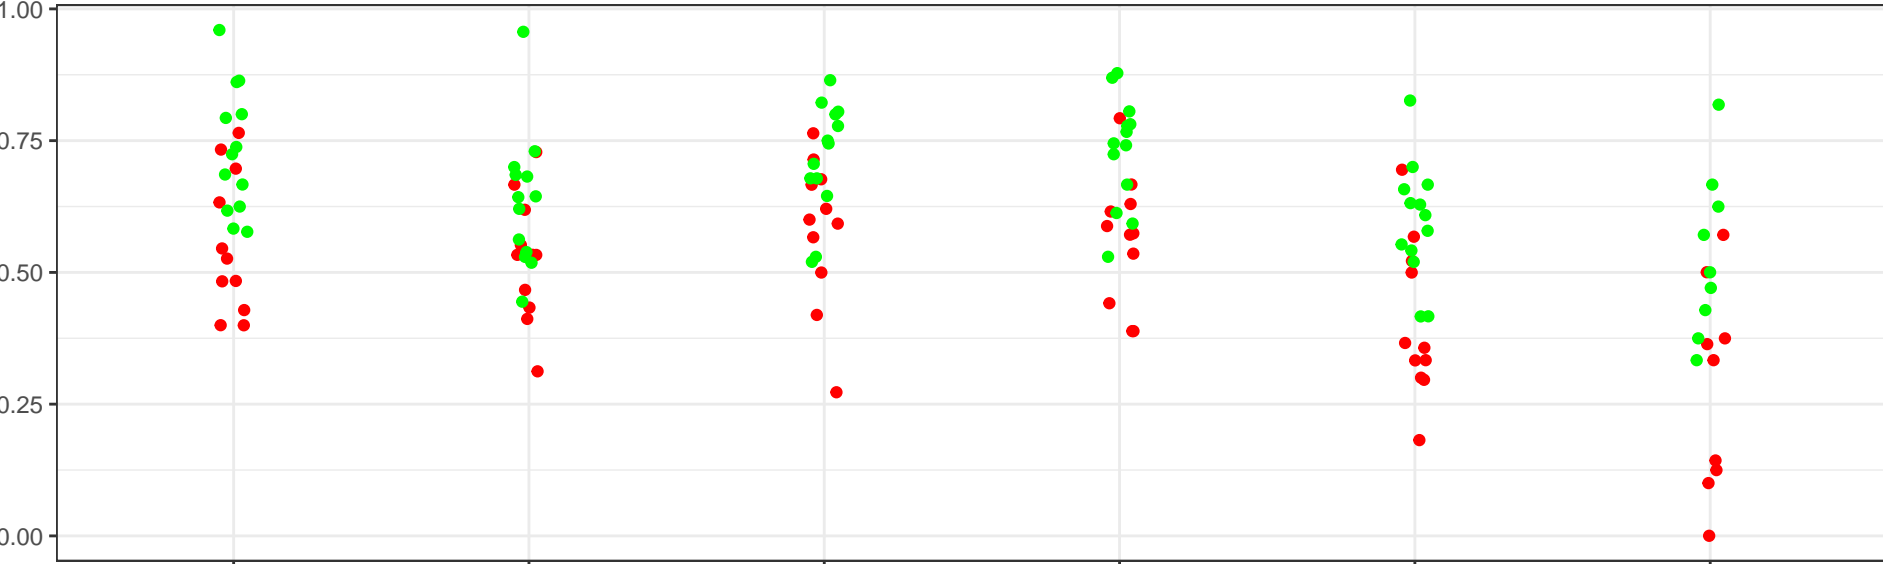

AC007569.1

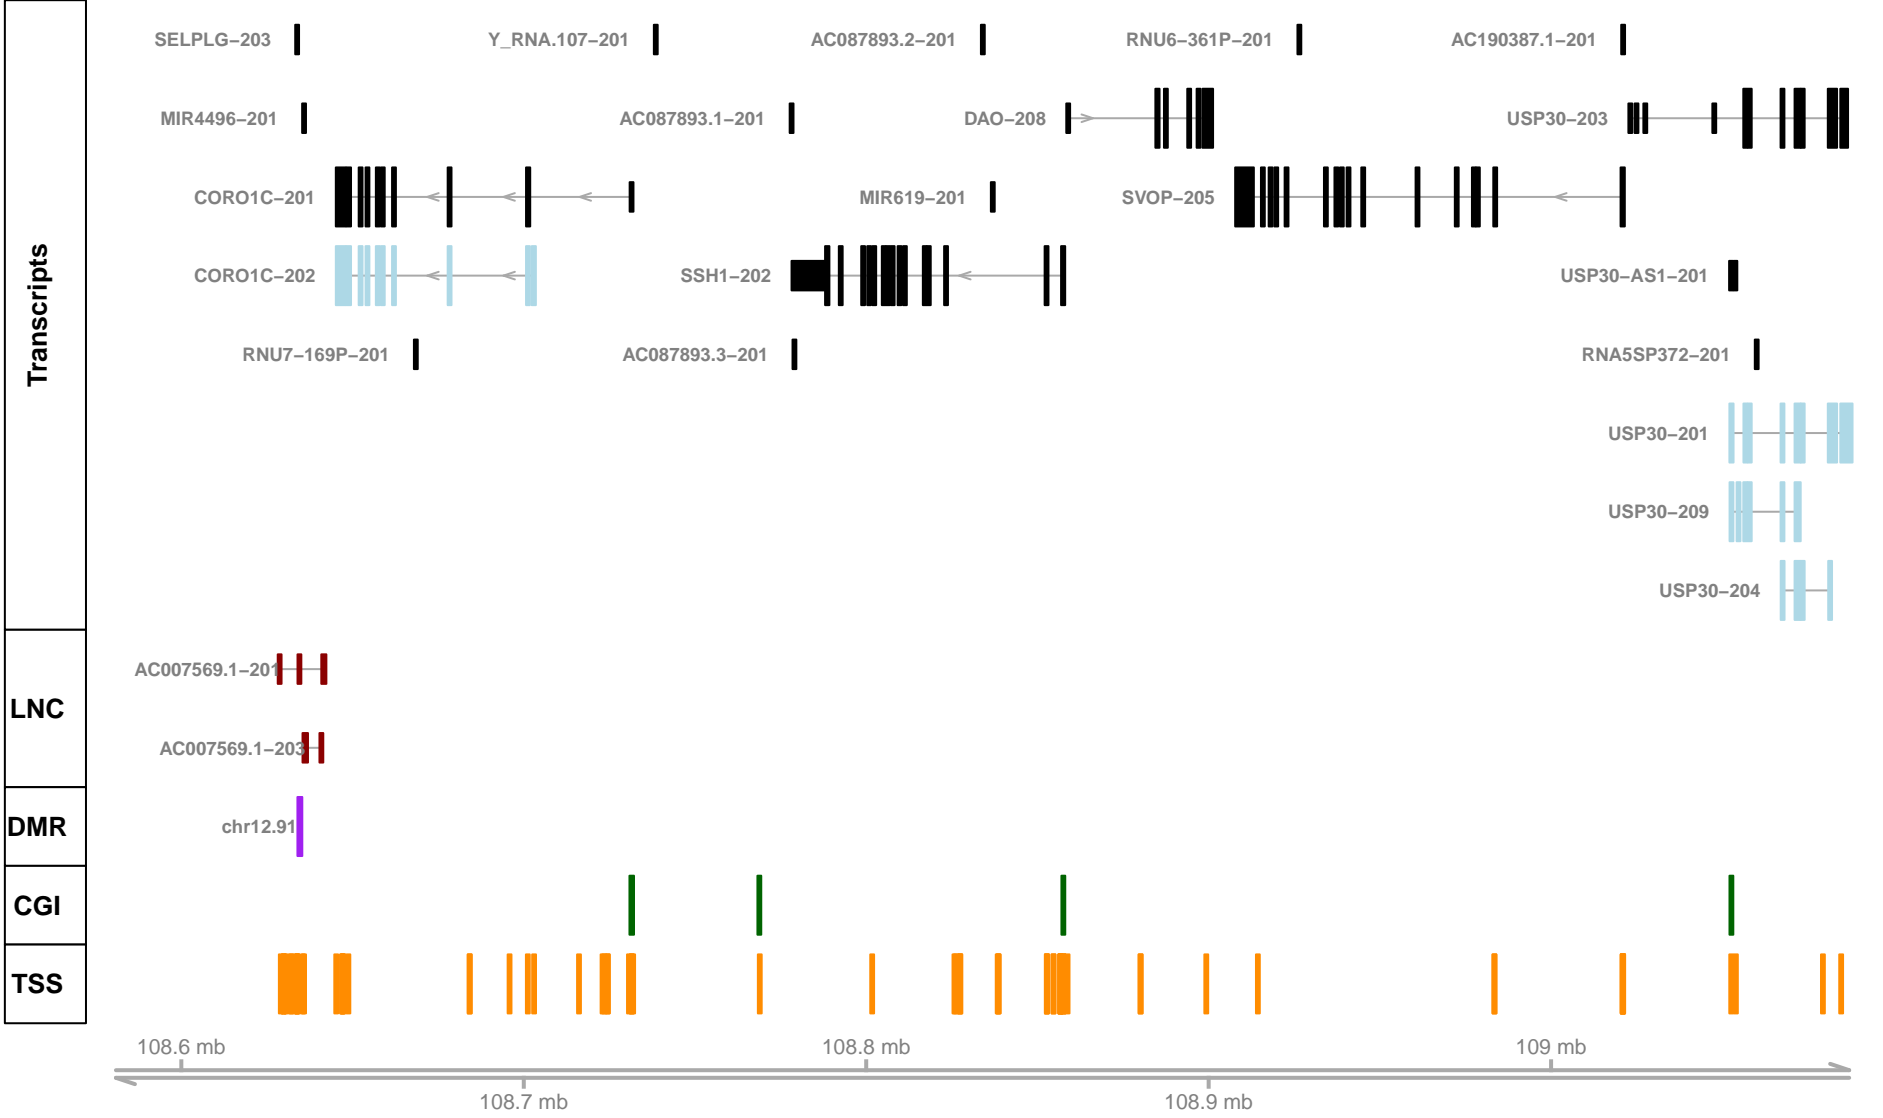

chr12.91

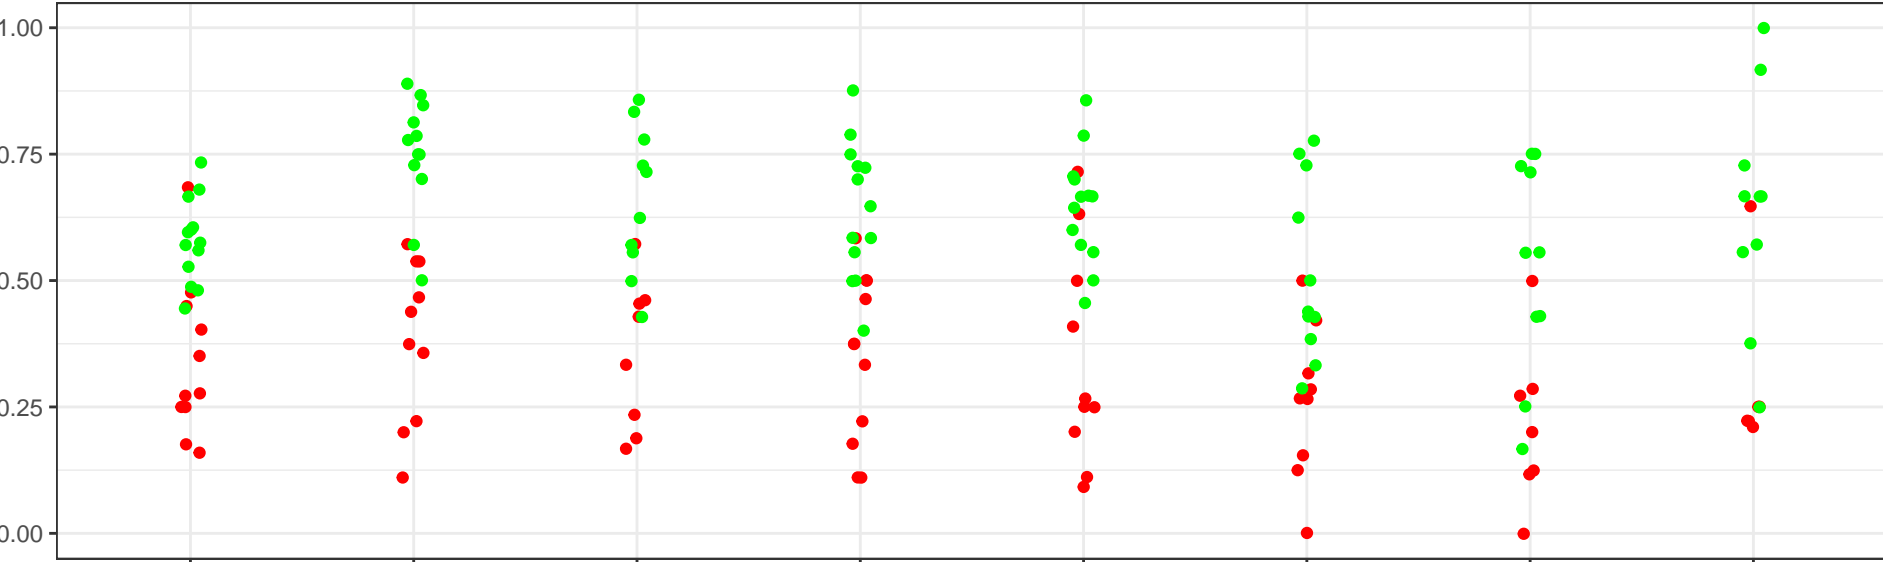

AC007750.1

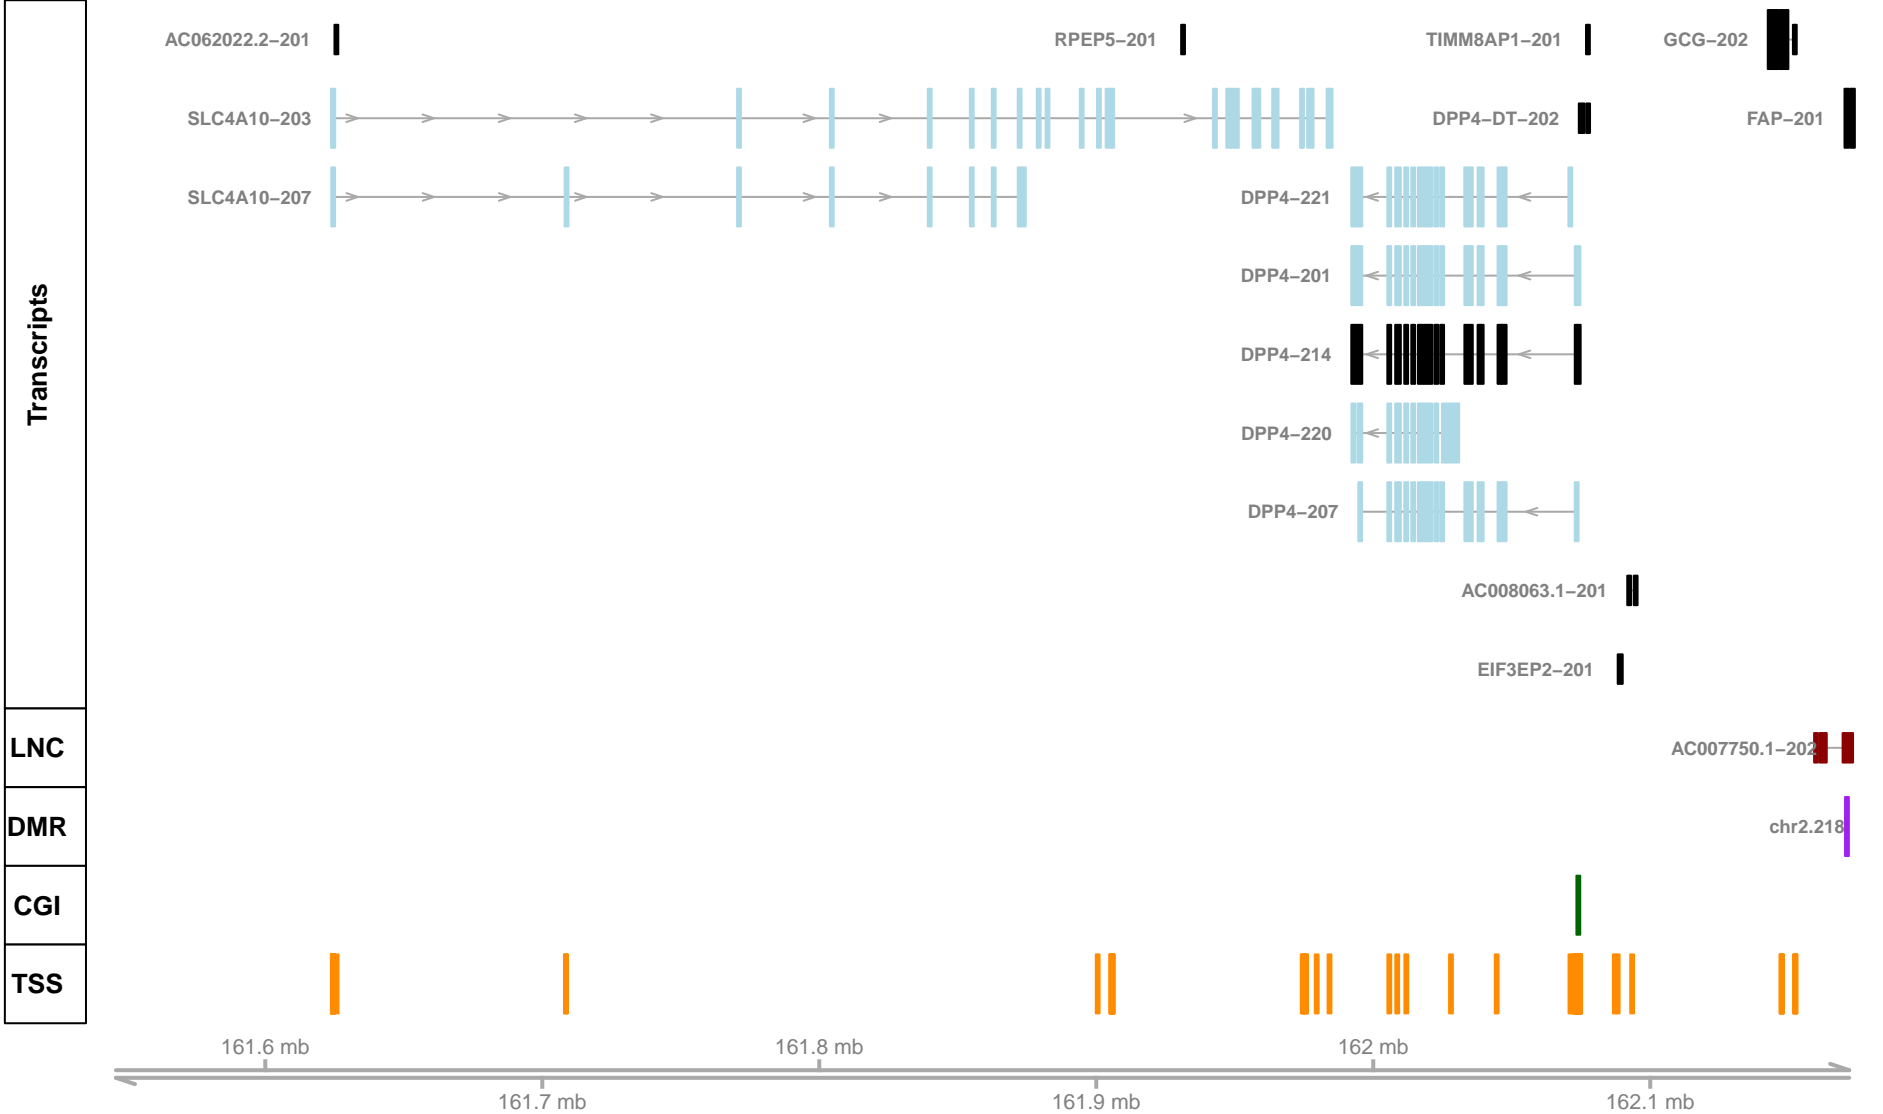

chr2.218

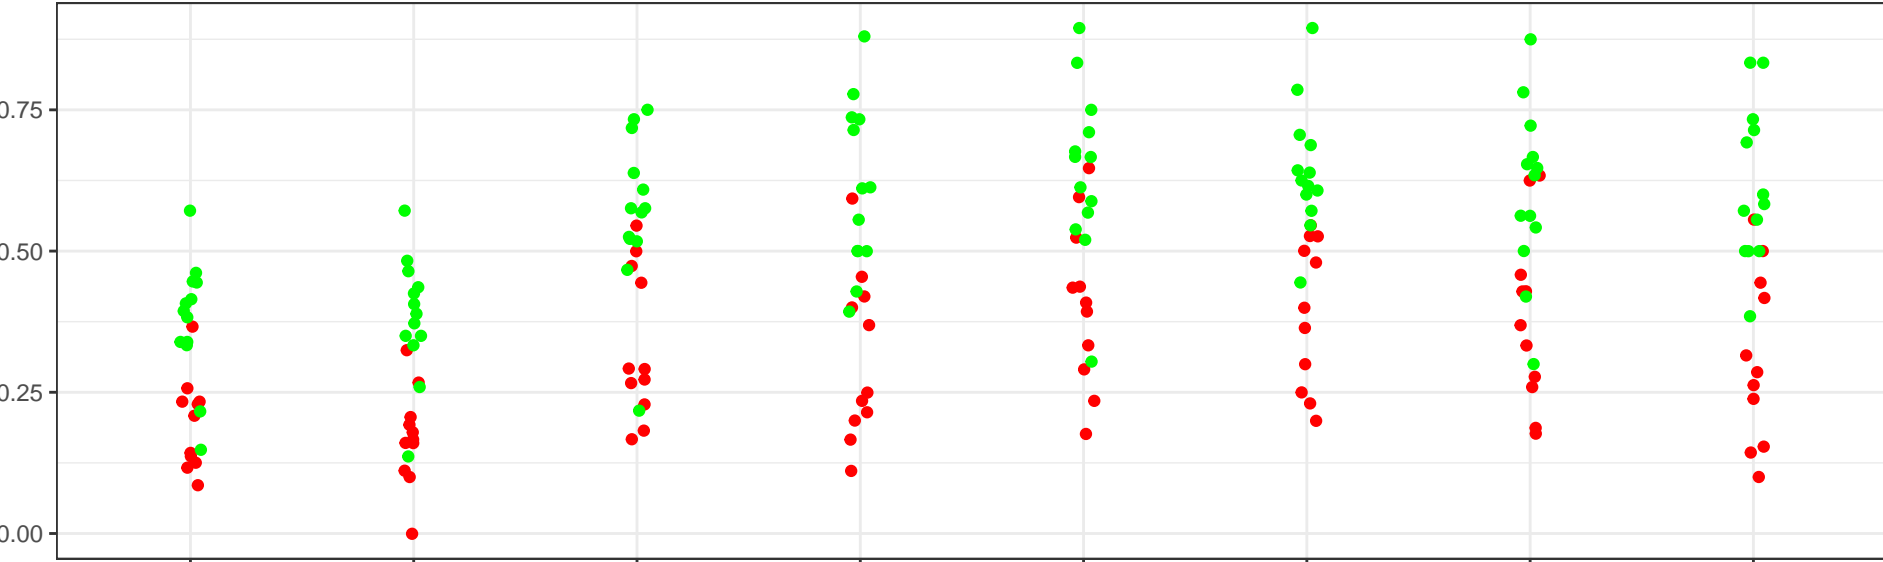

AC008147.1

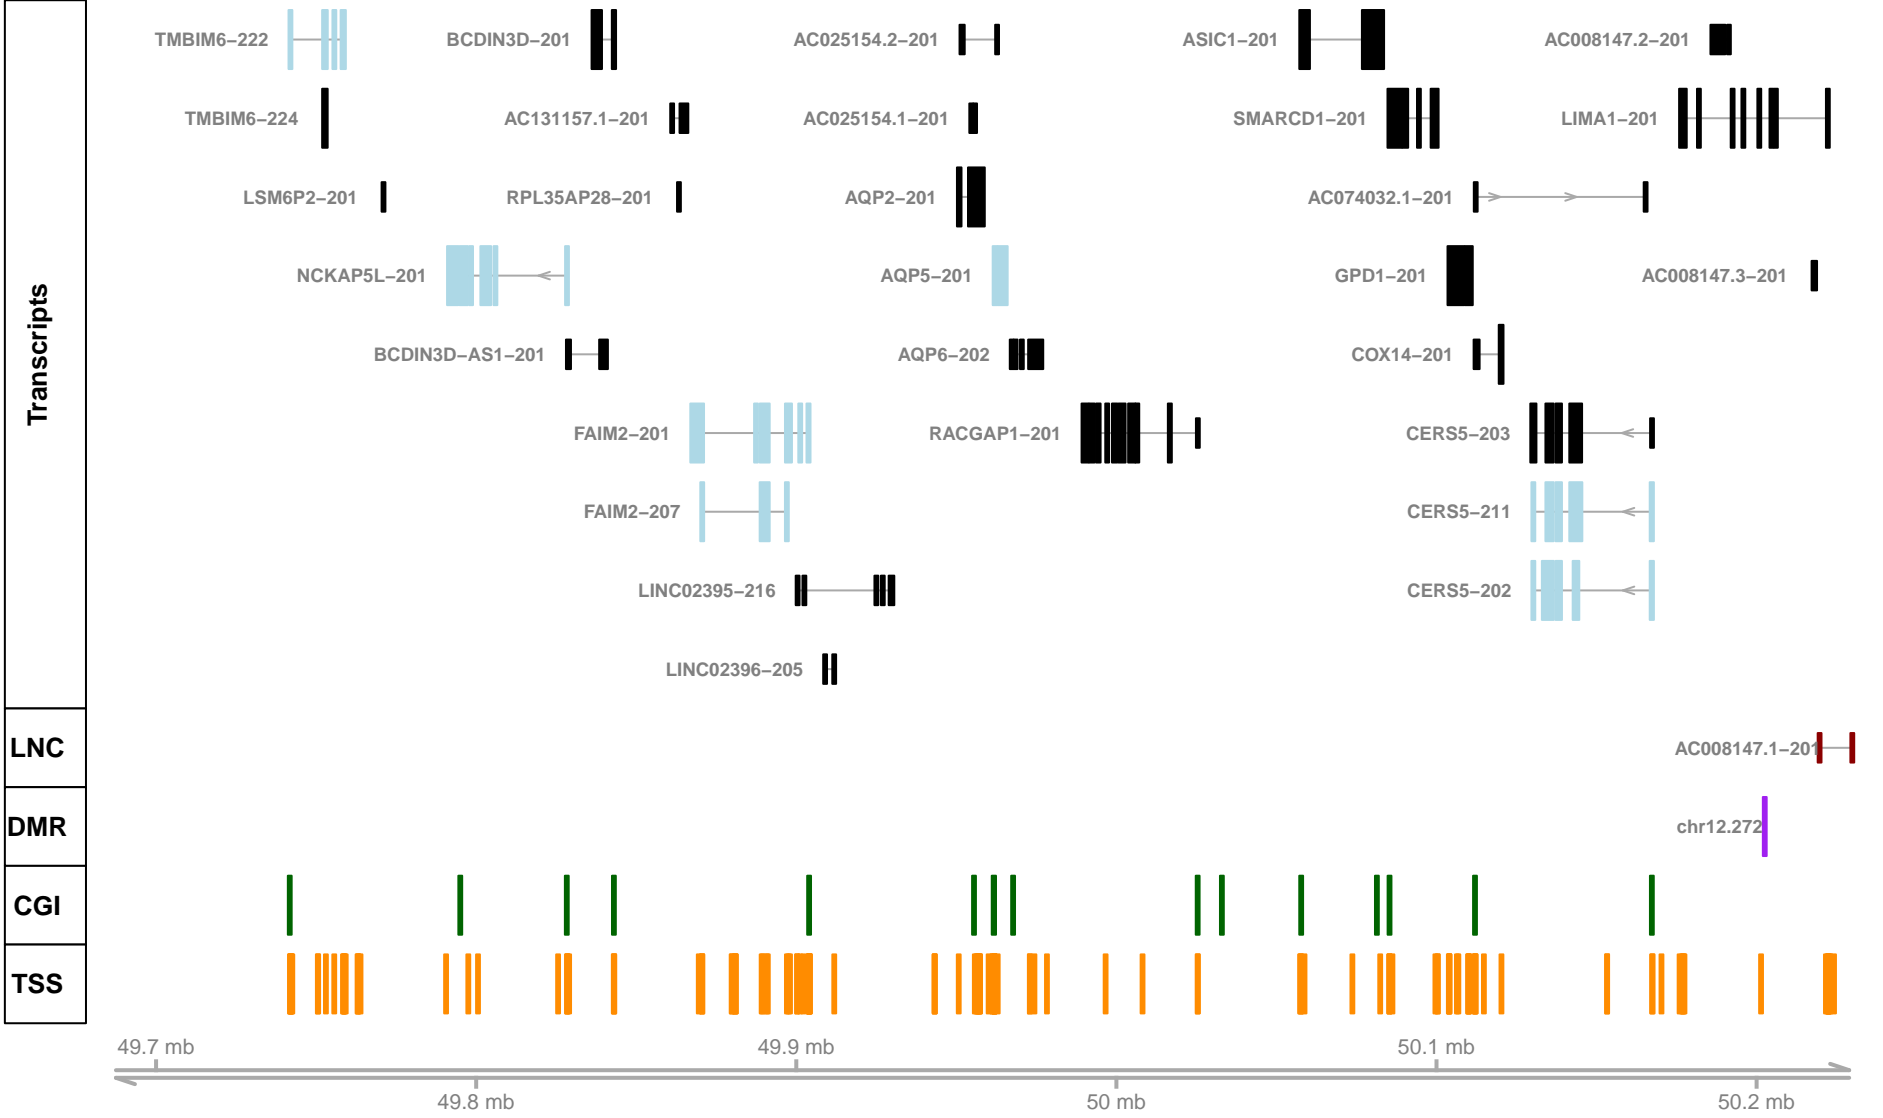

chr12.272

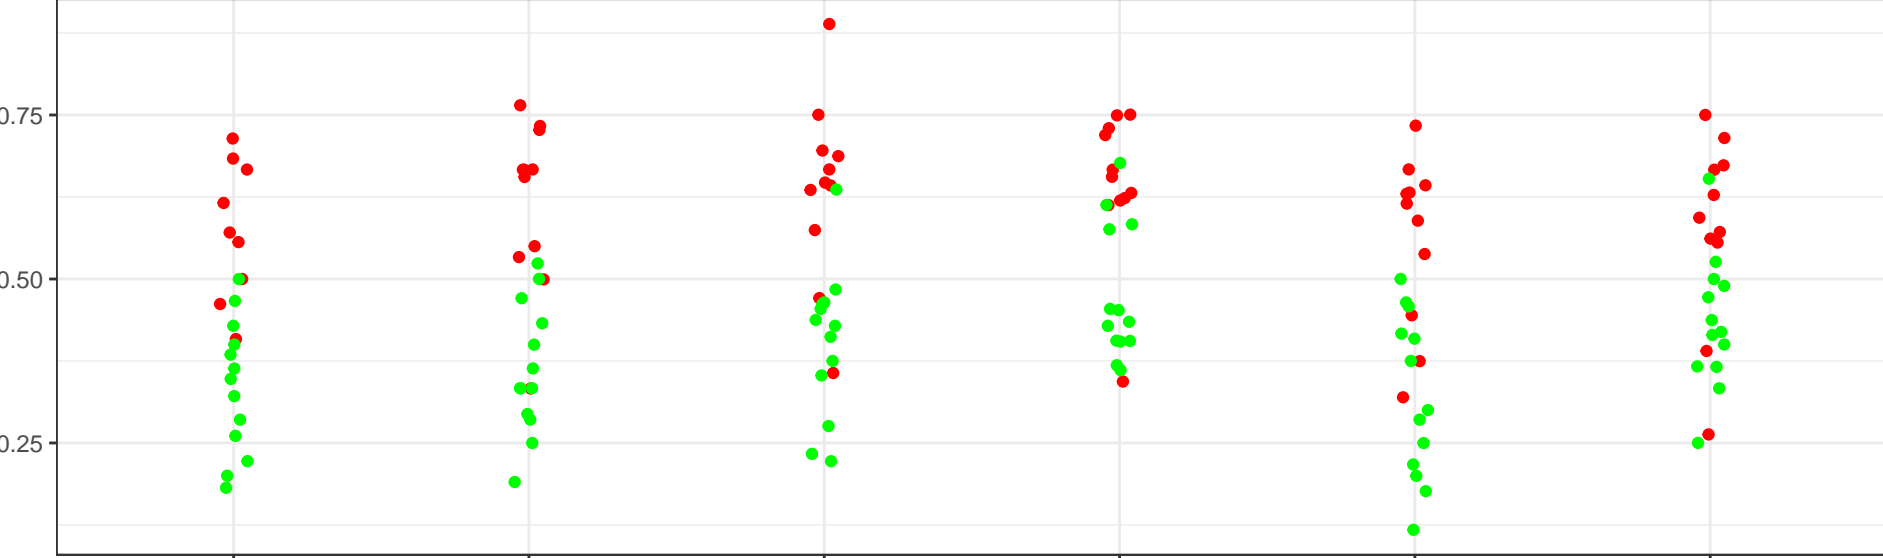

AC008147.2

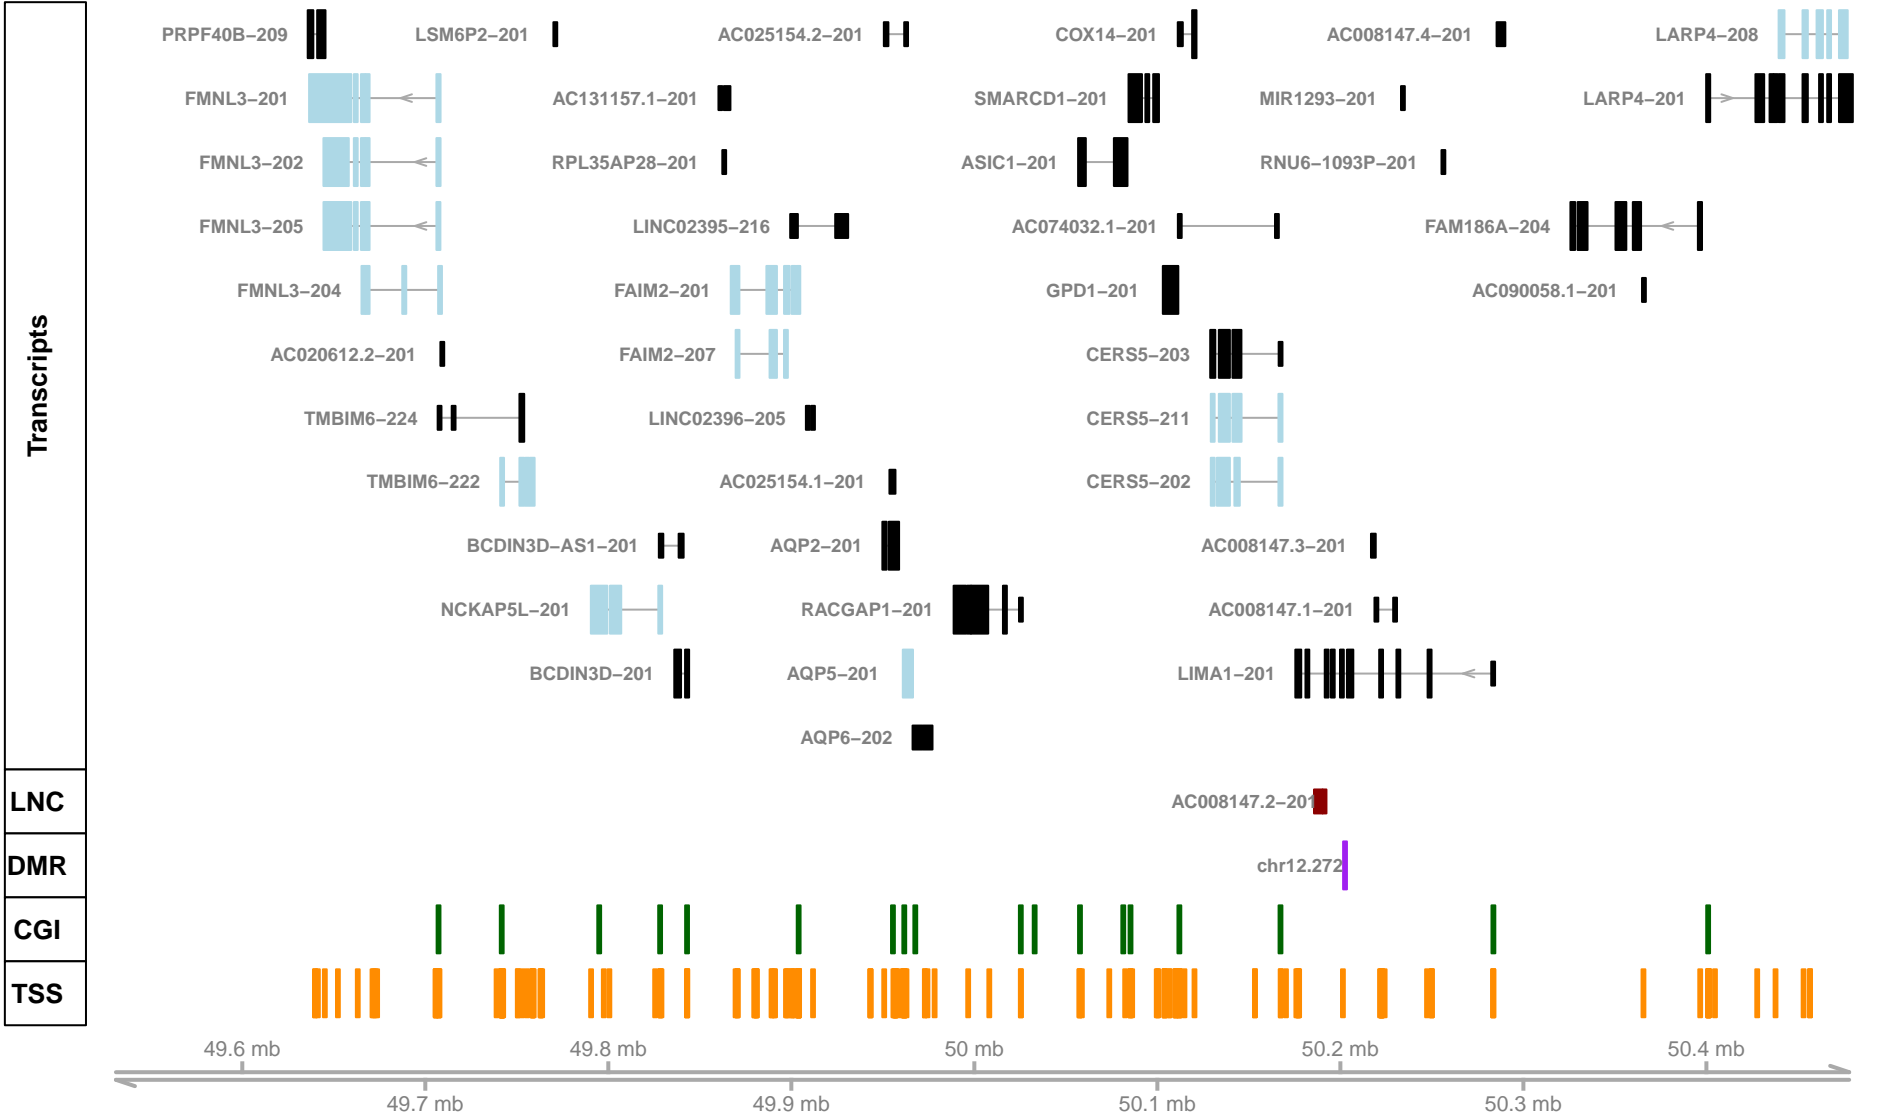

chr12.272

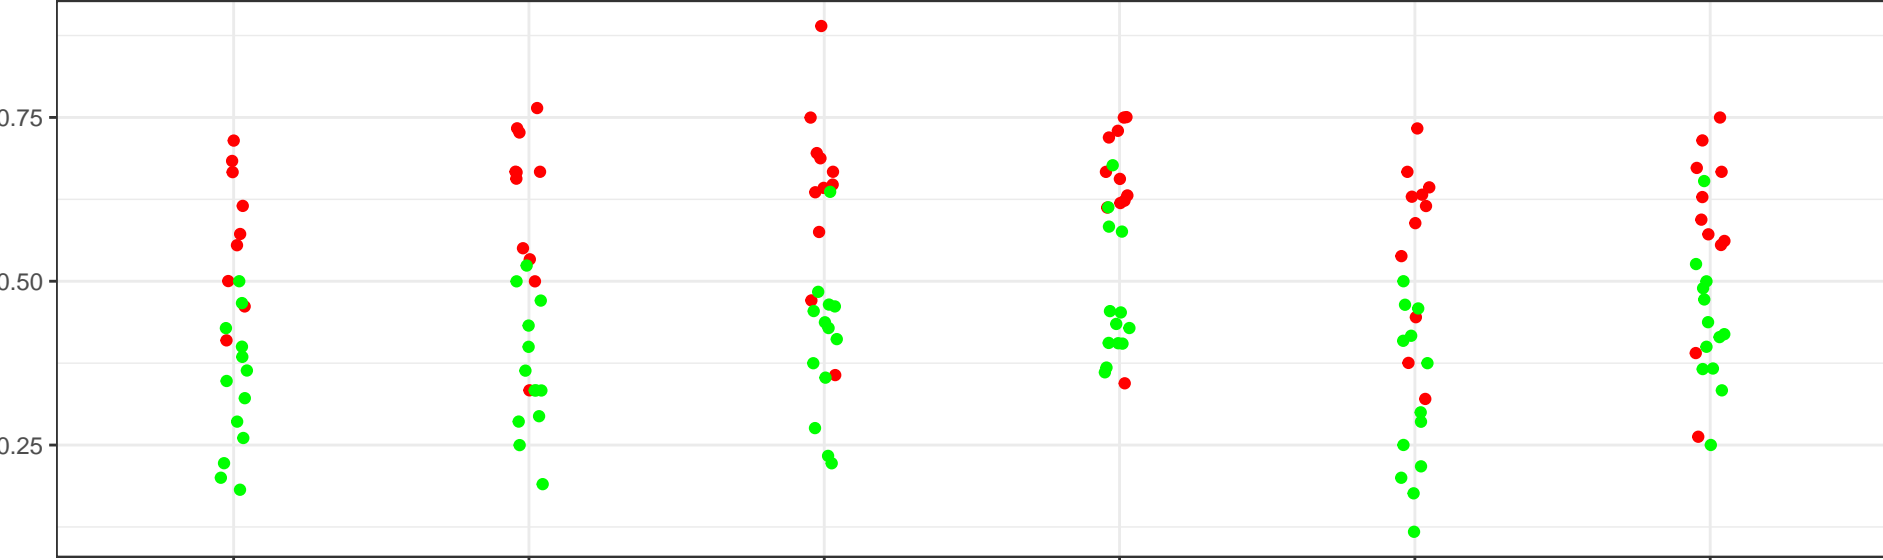

AC008750.1

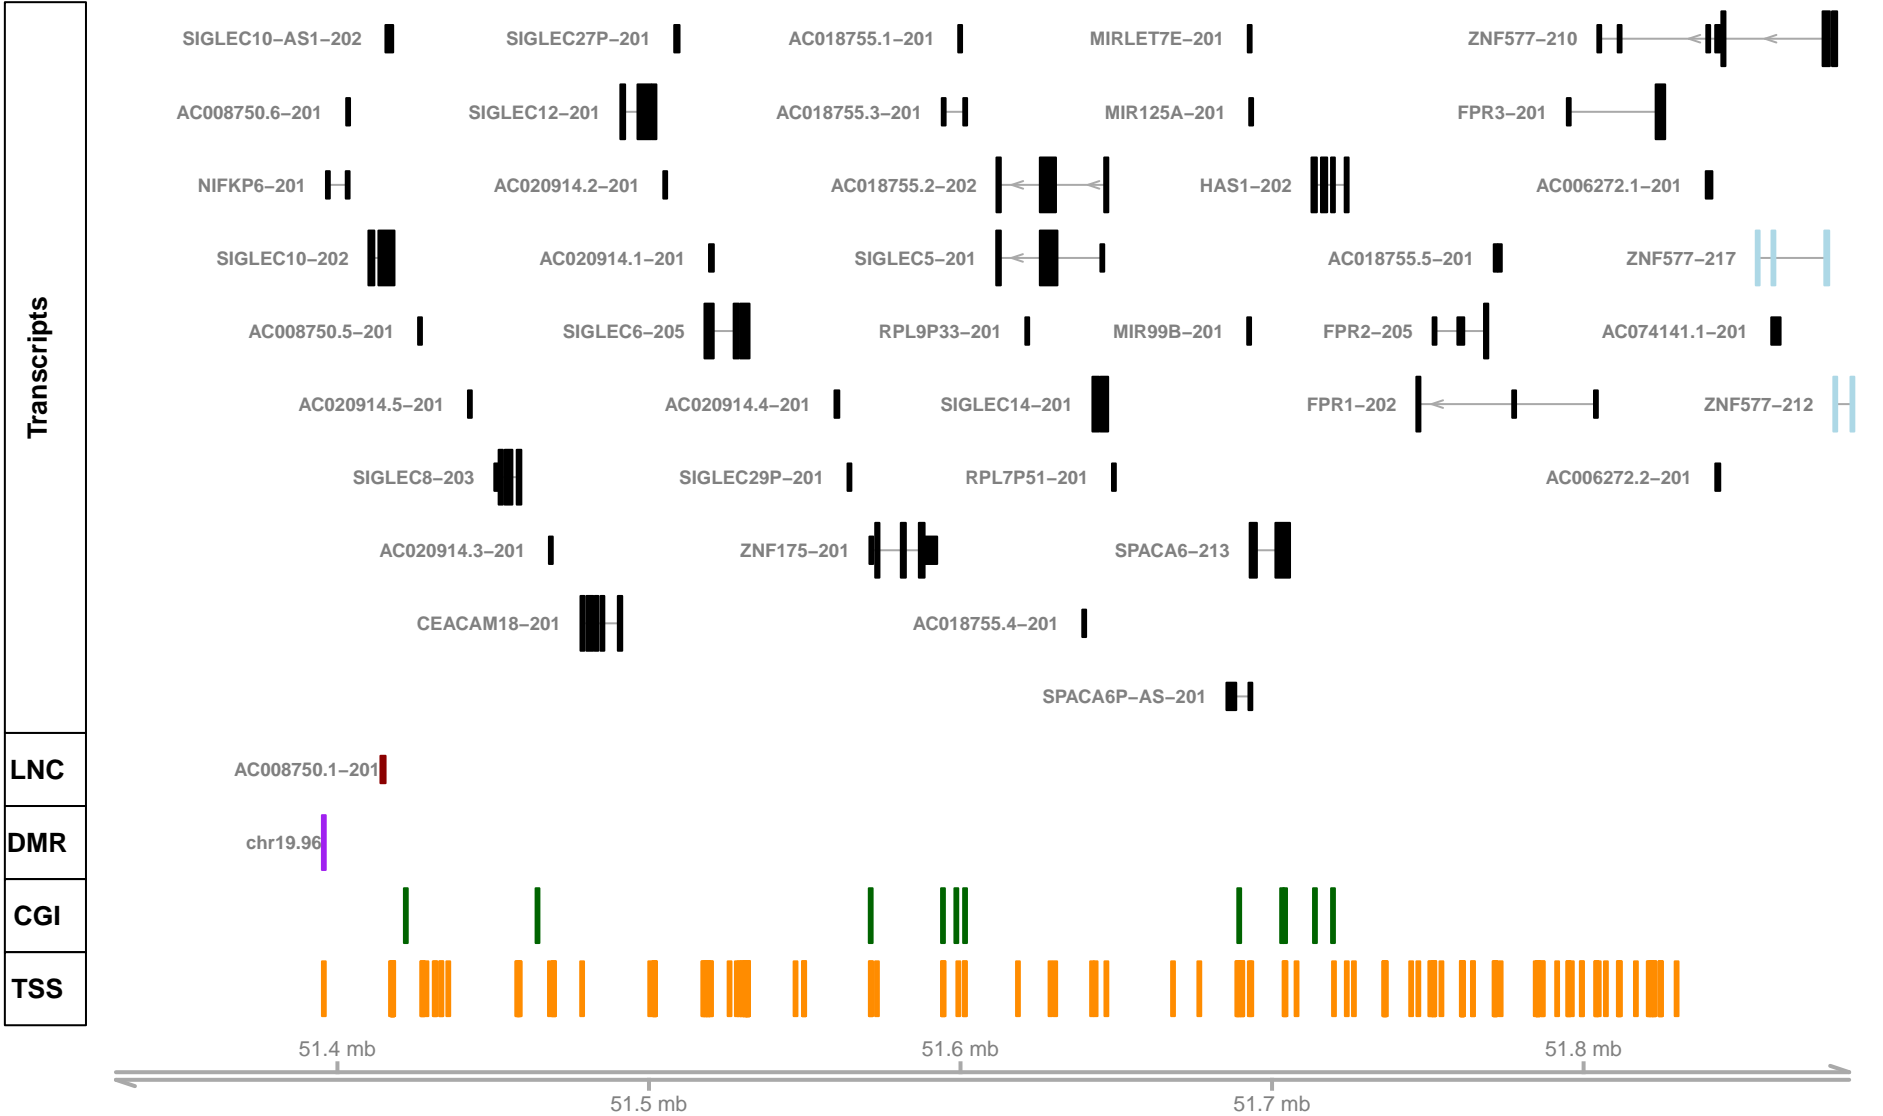

chr19.96

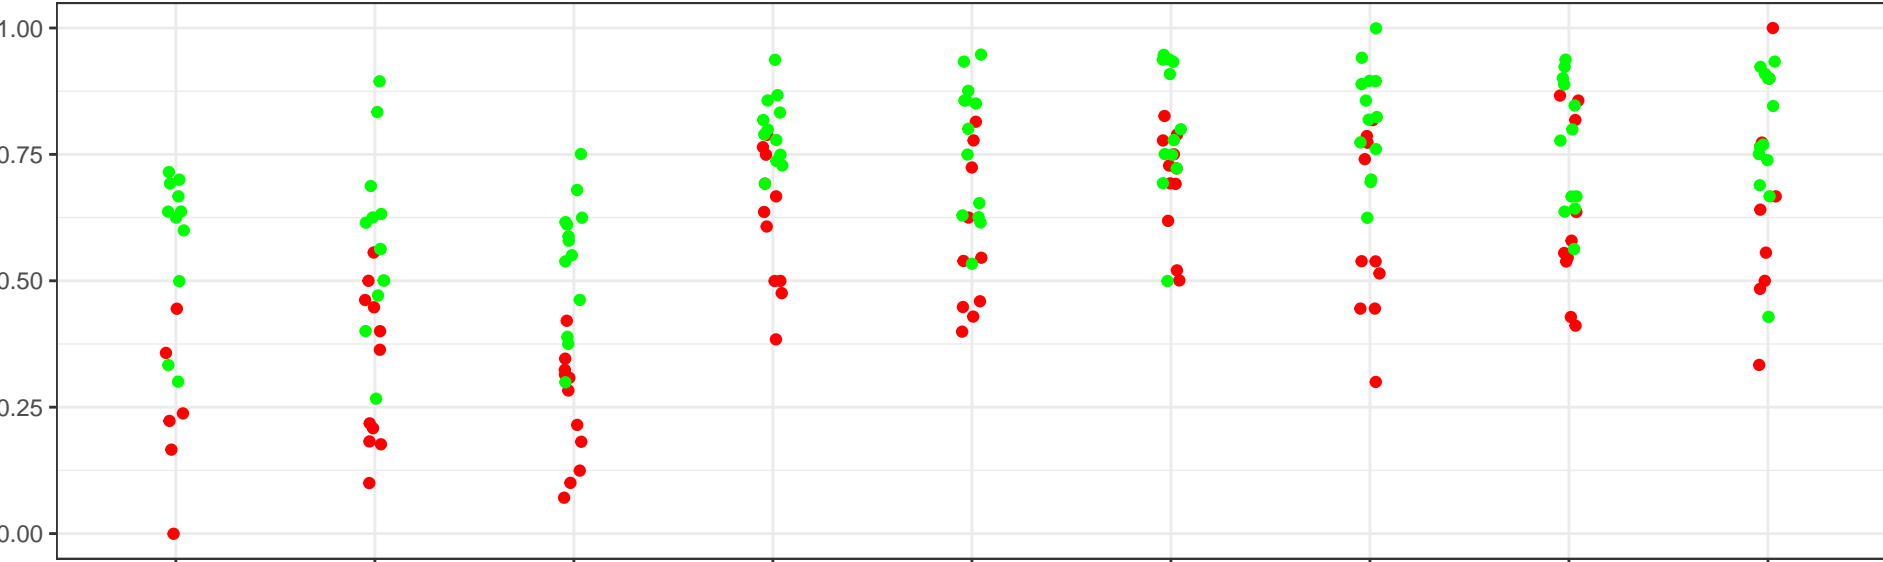

# AC008760.2

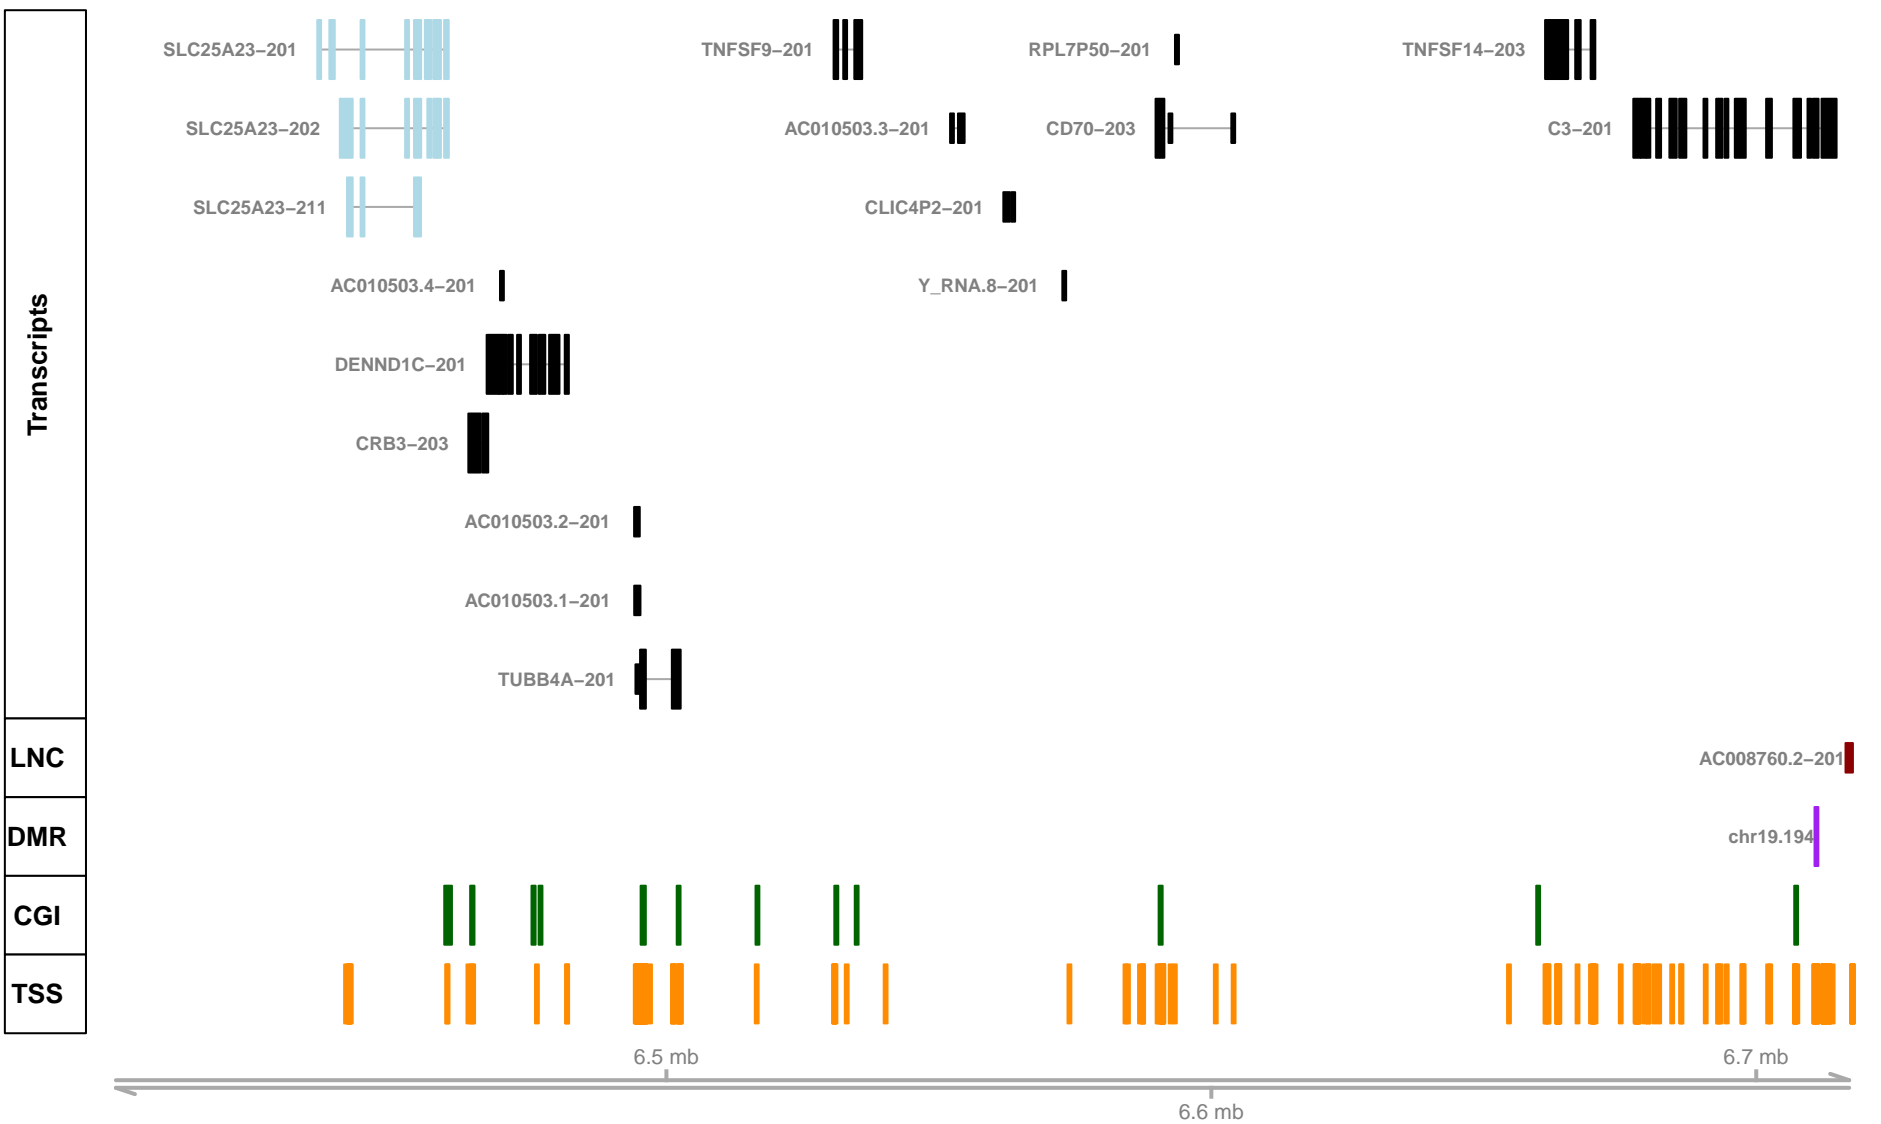

## chr19.194

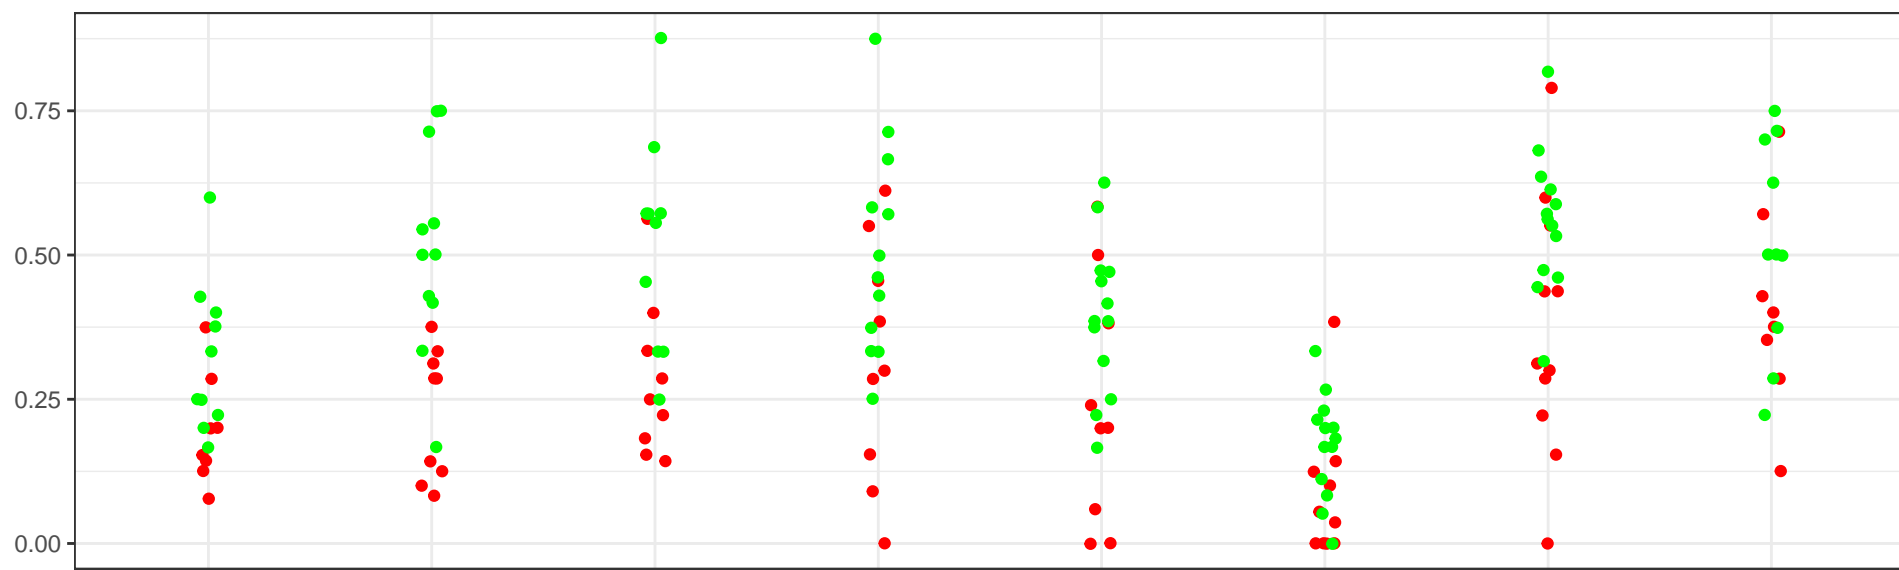

# AC008875.3

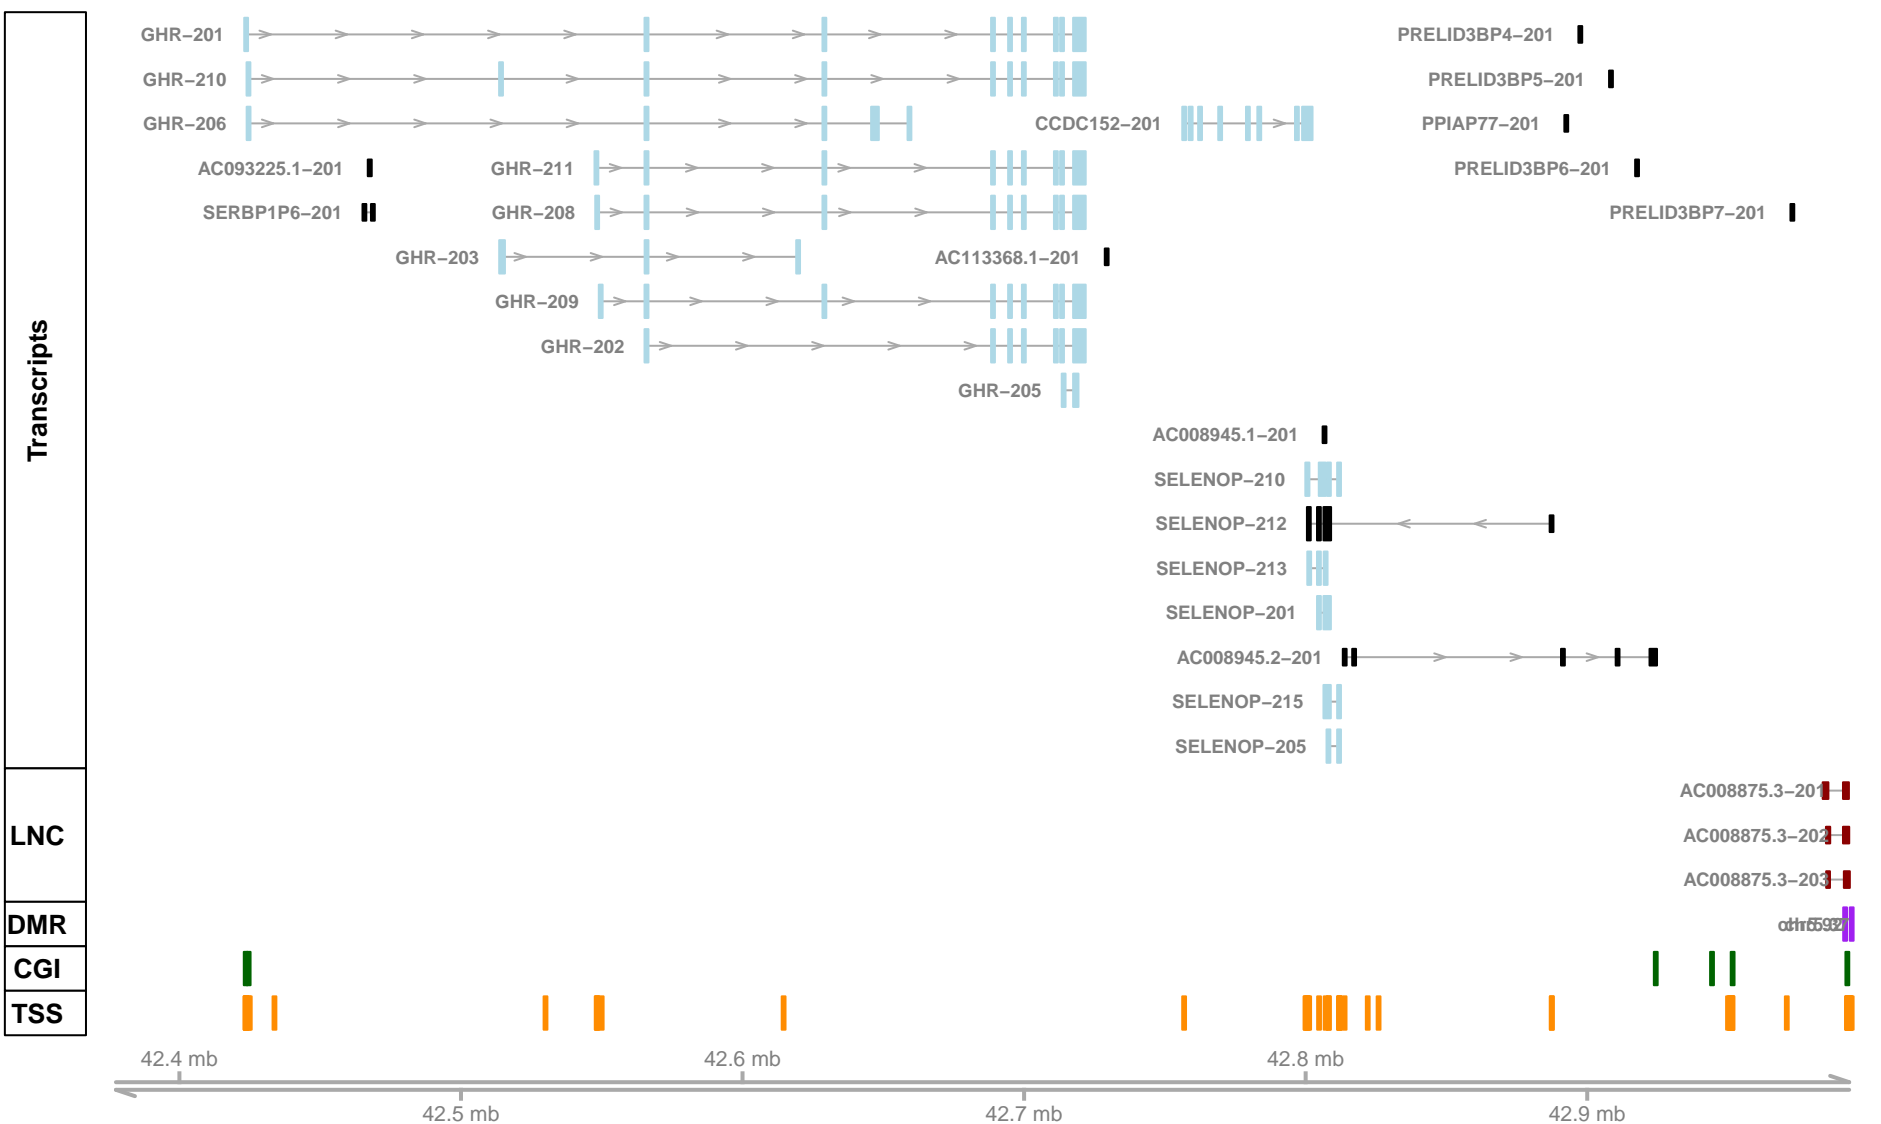

chr5.92

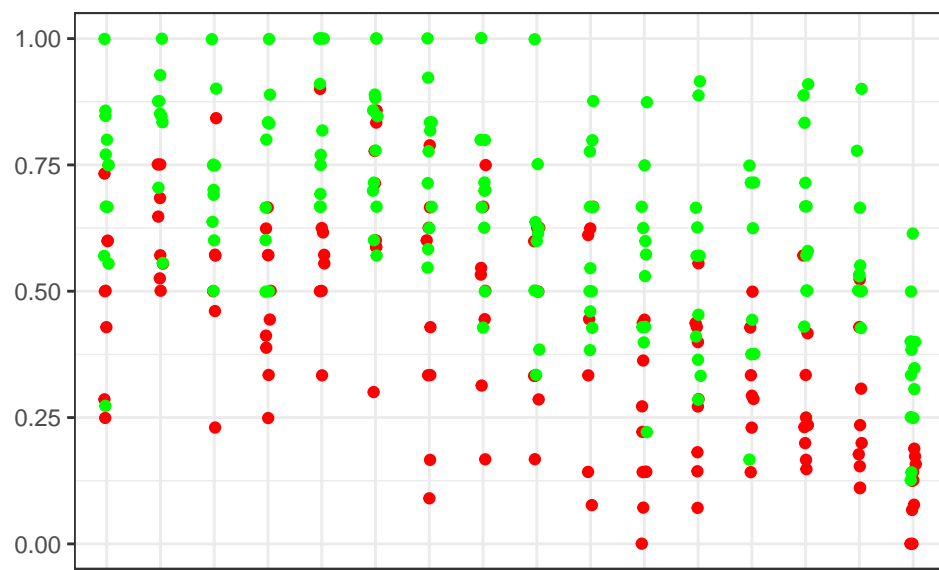

chr5.37

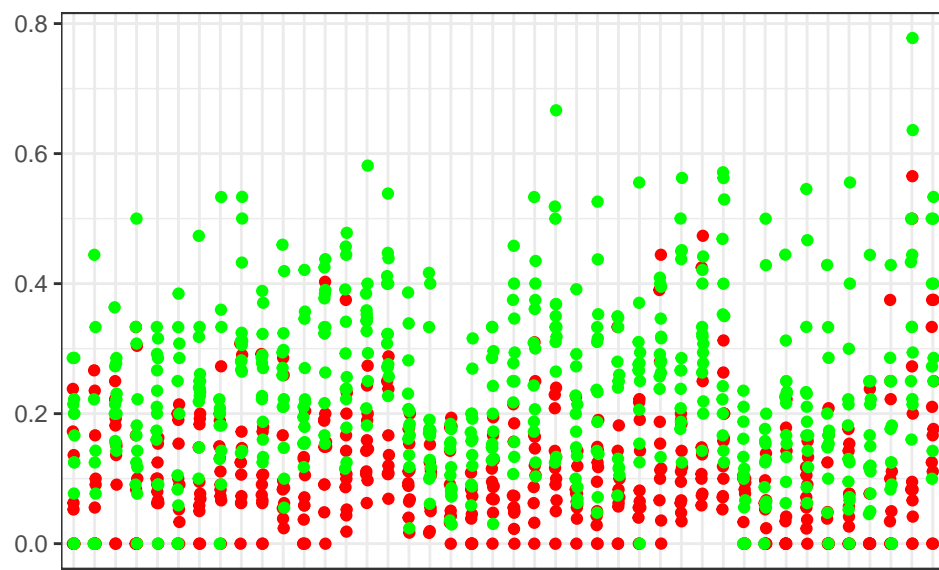

# AC008906.2

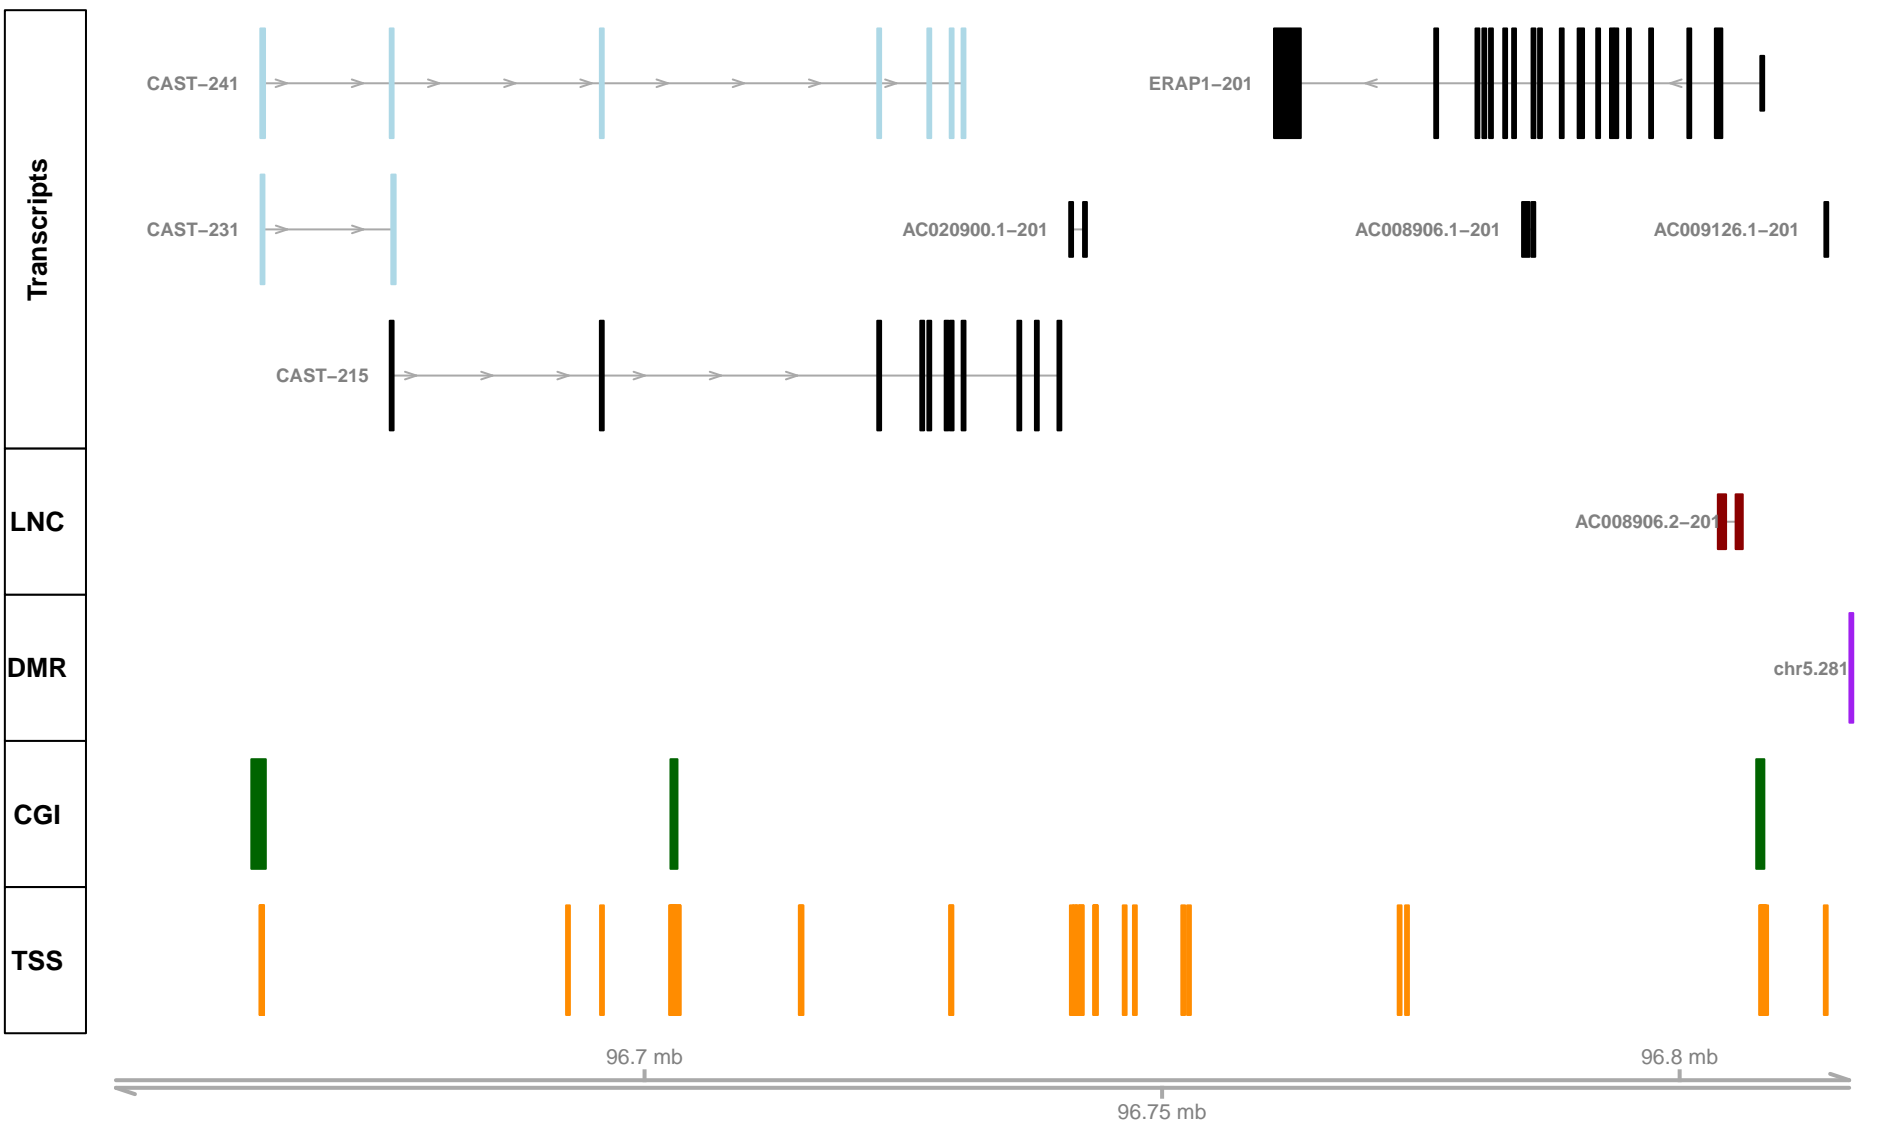

## chr5.281

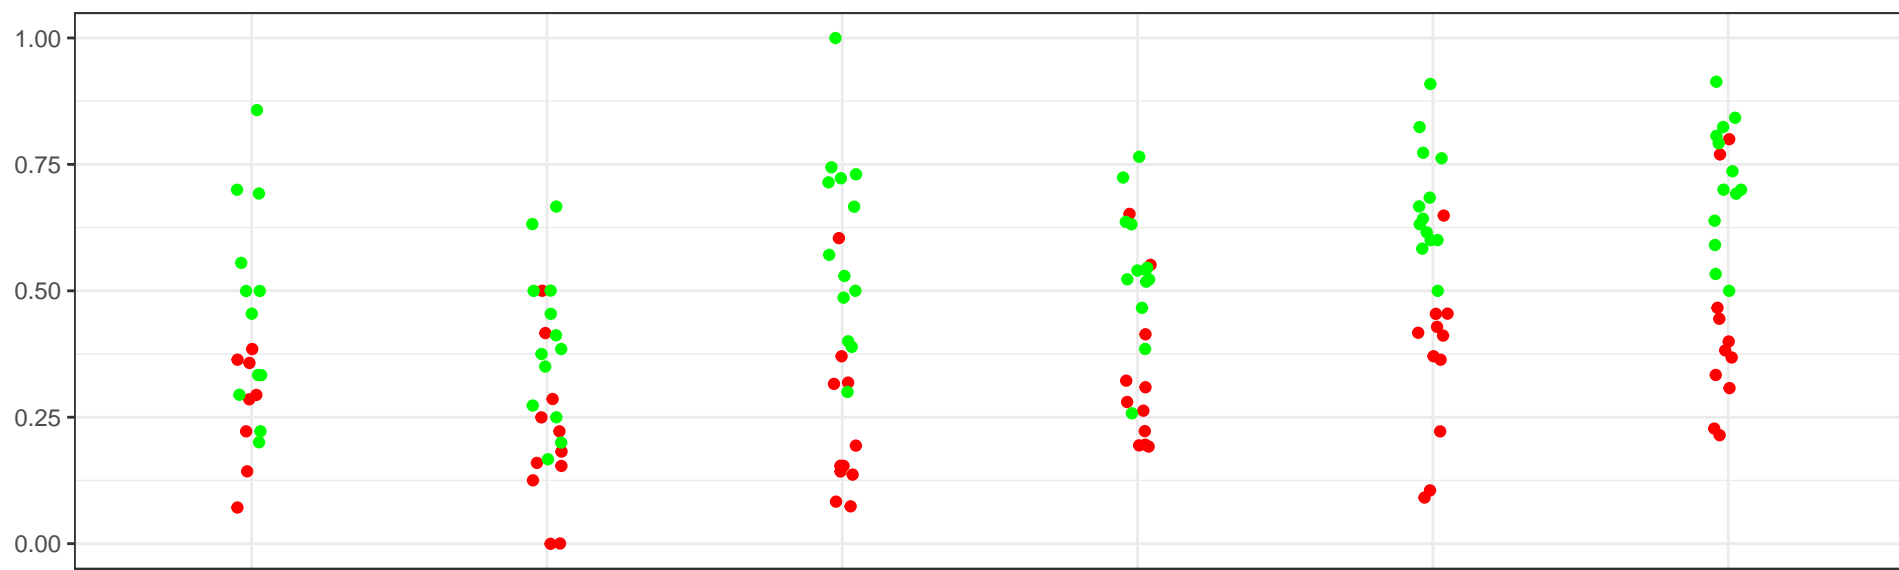

AC009509.4

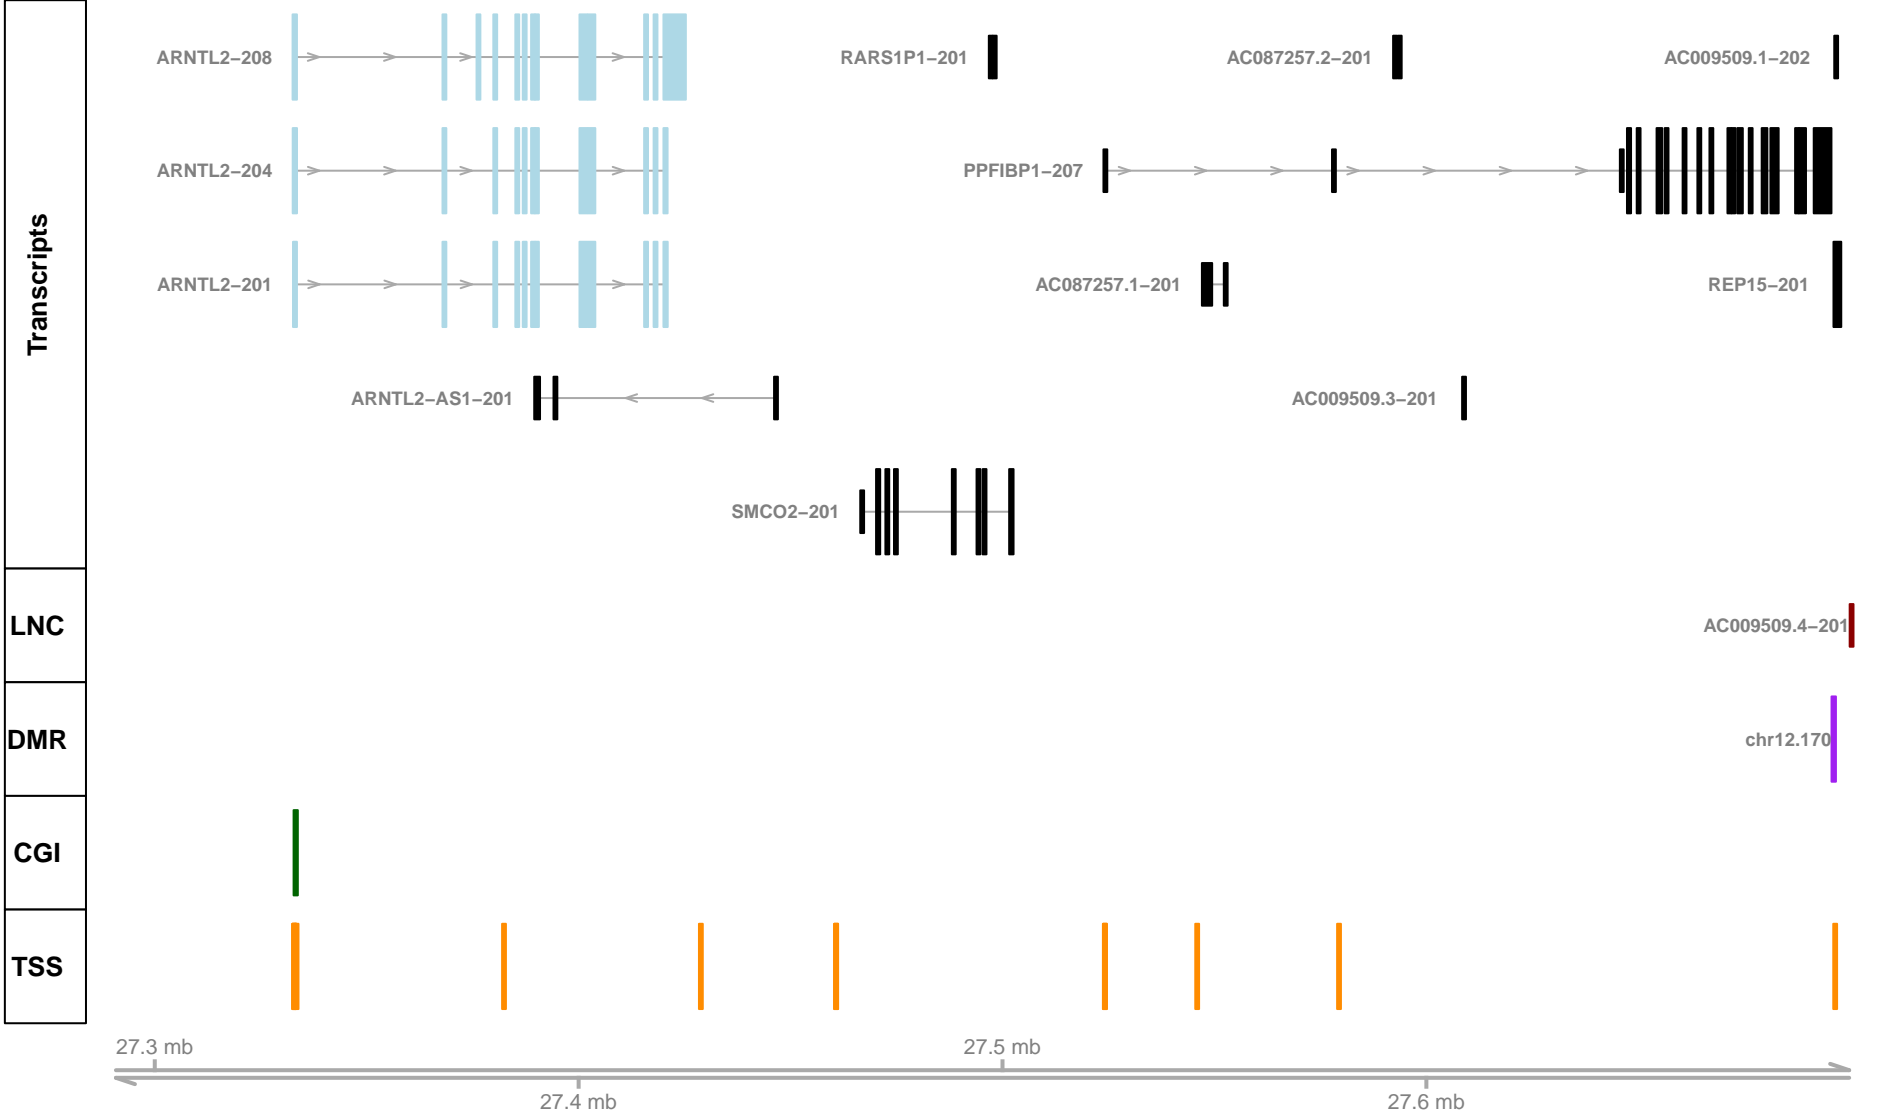

chr12.170

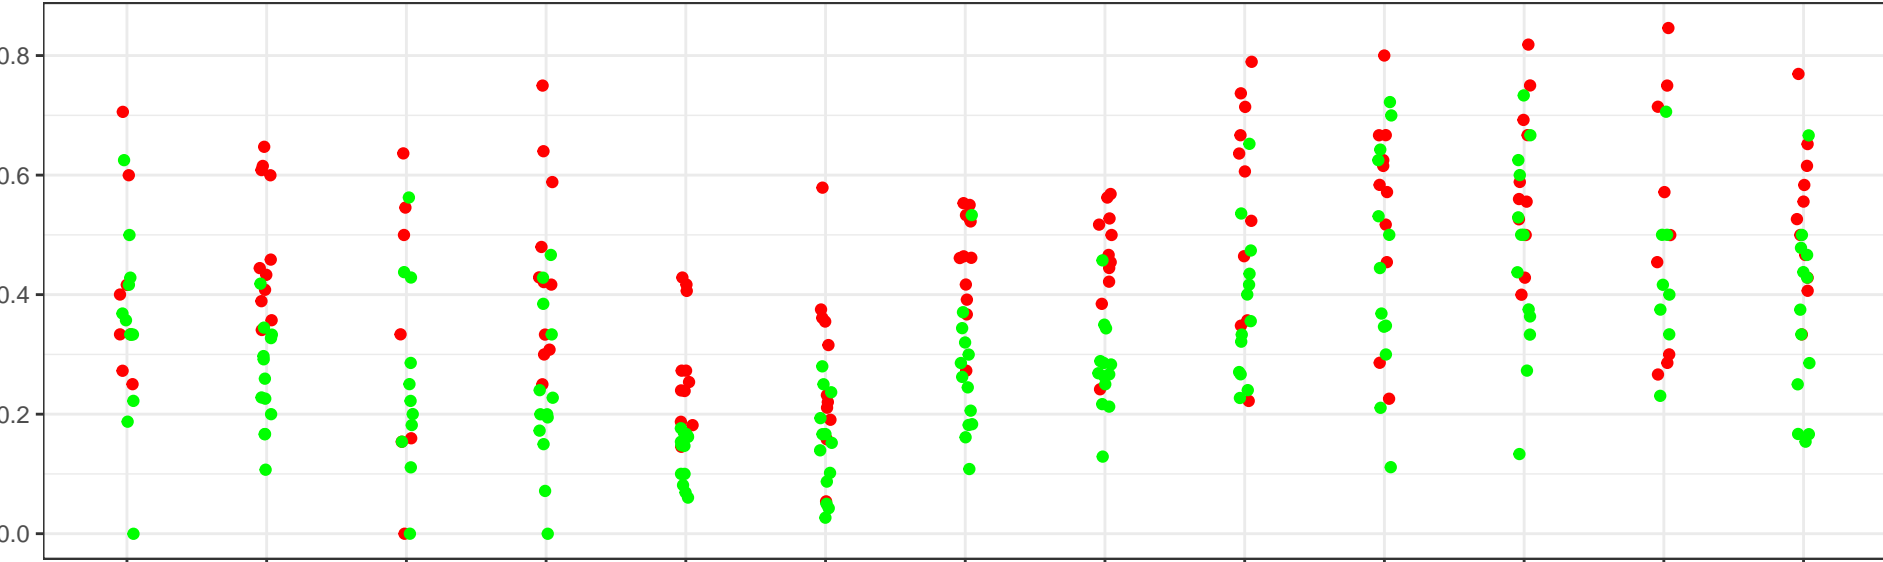

## AC010536.1

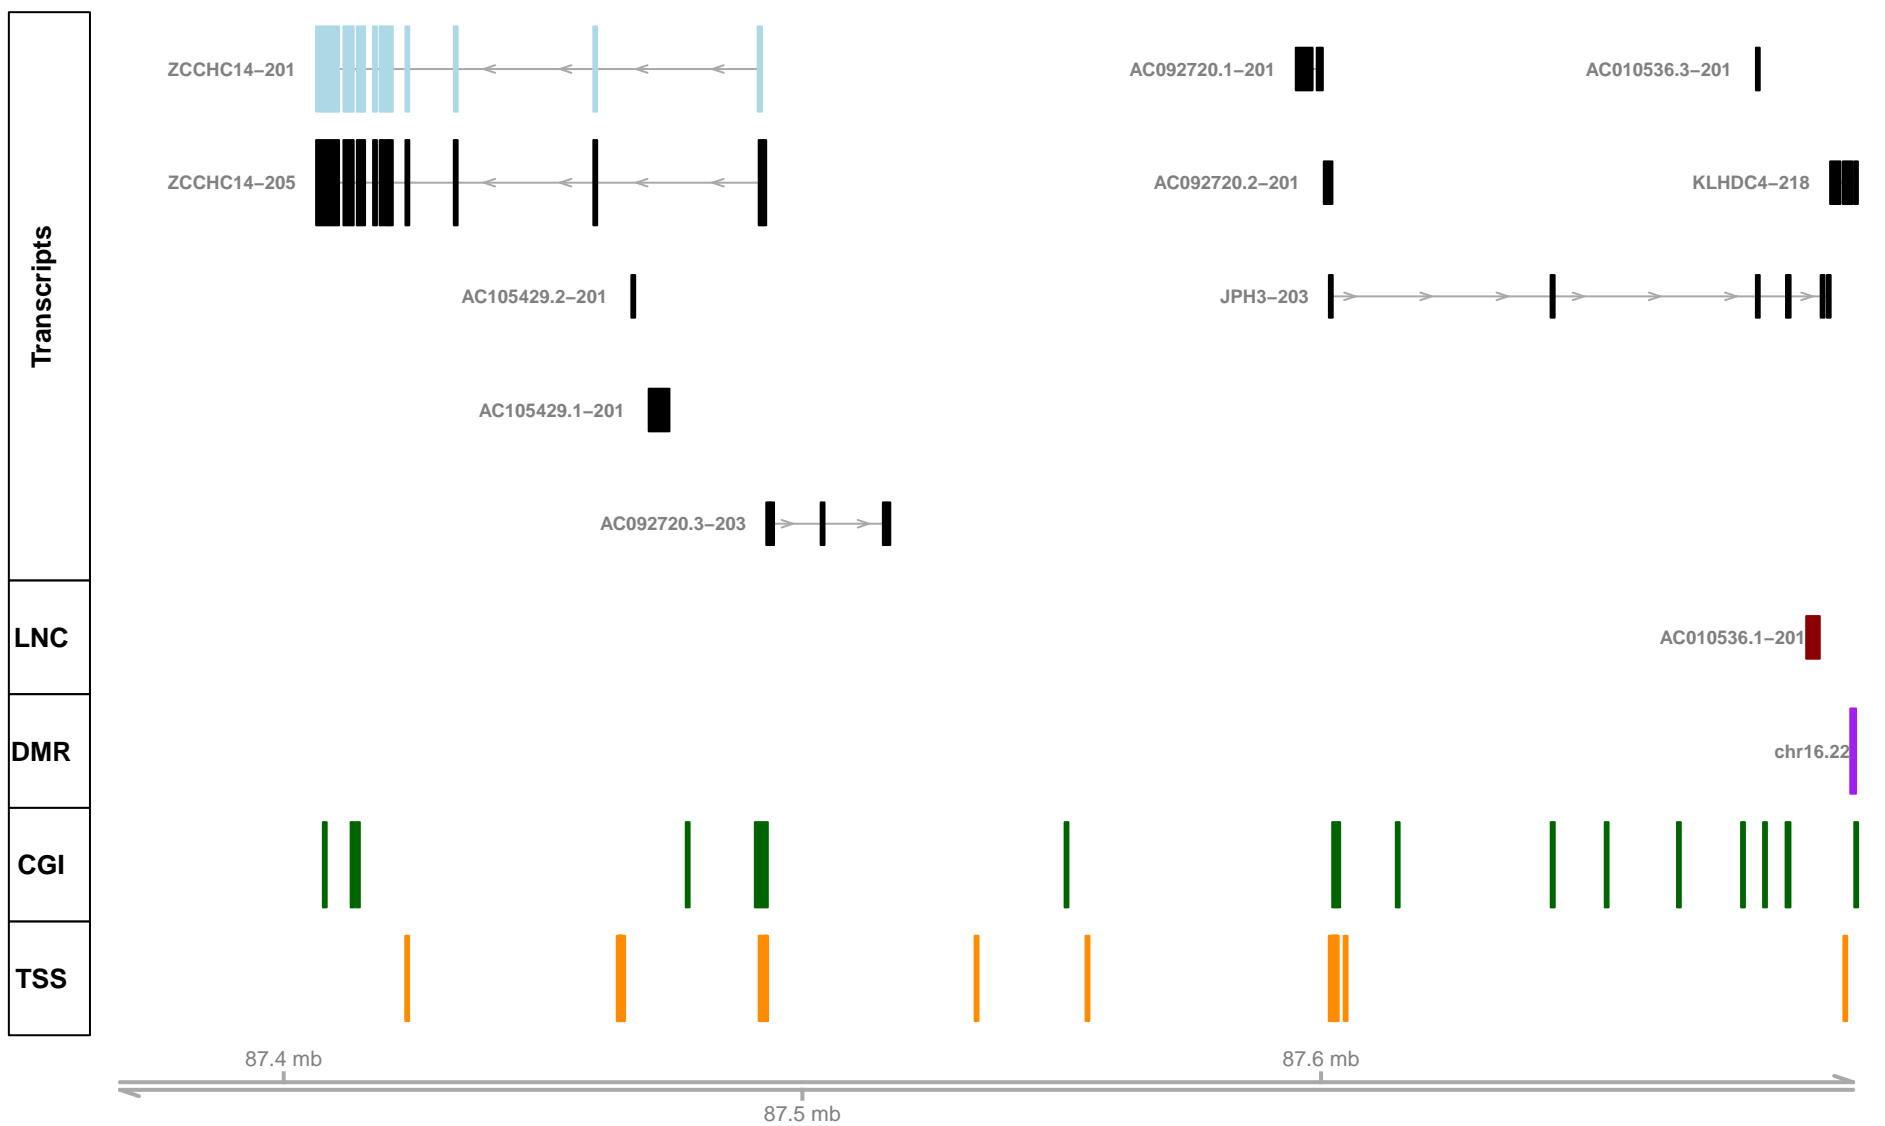

## chr16.22

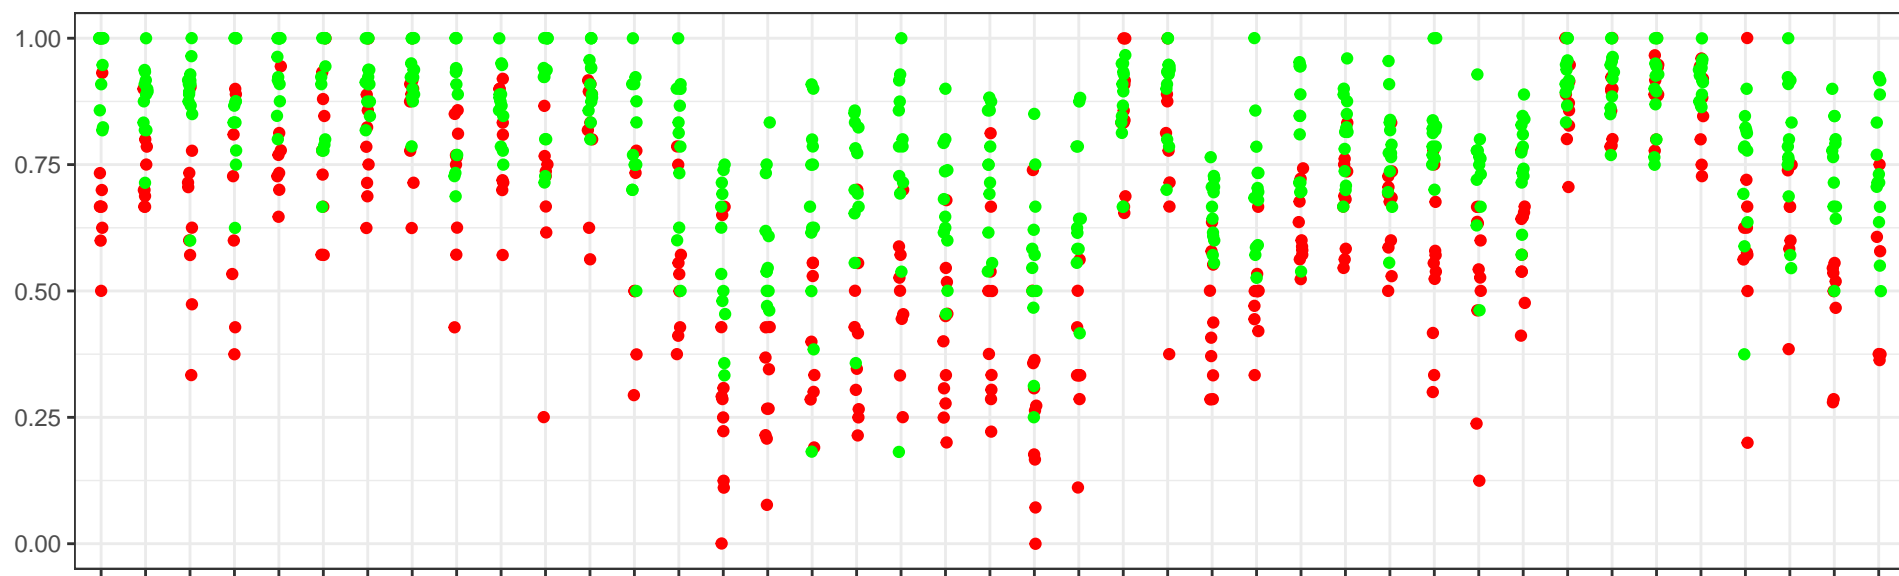

# AC010609.1

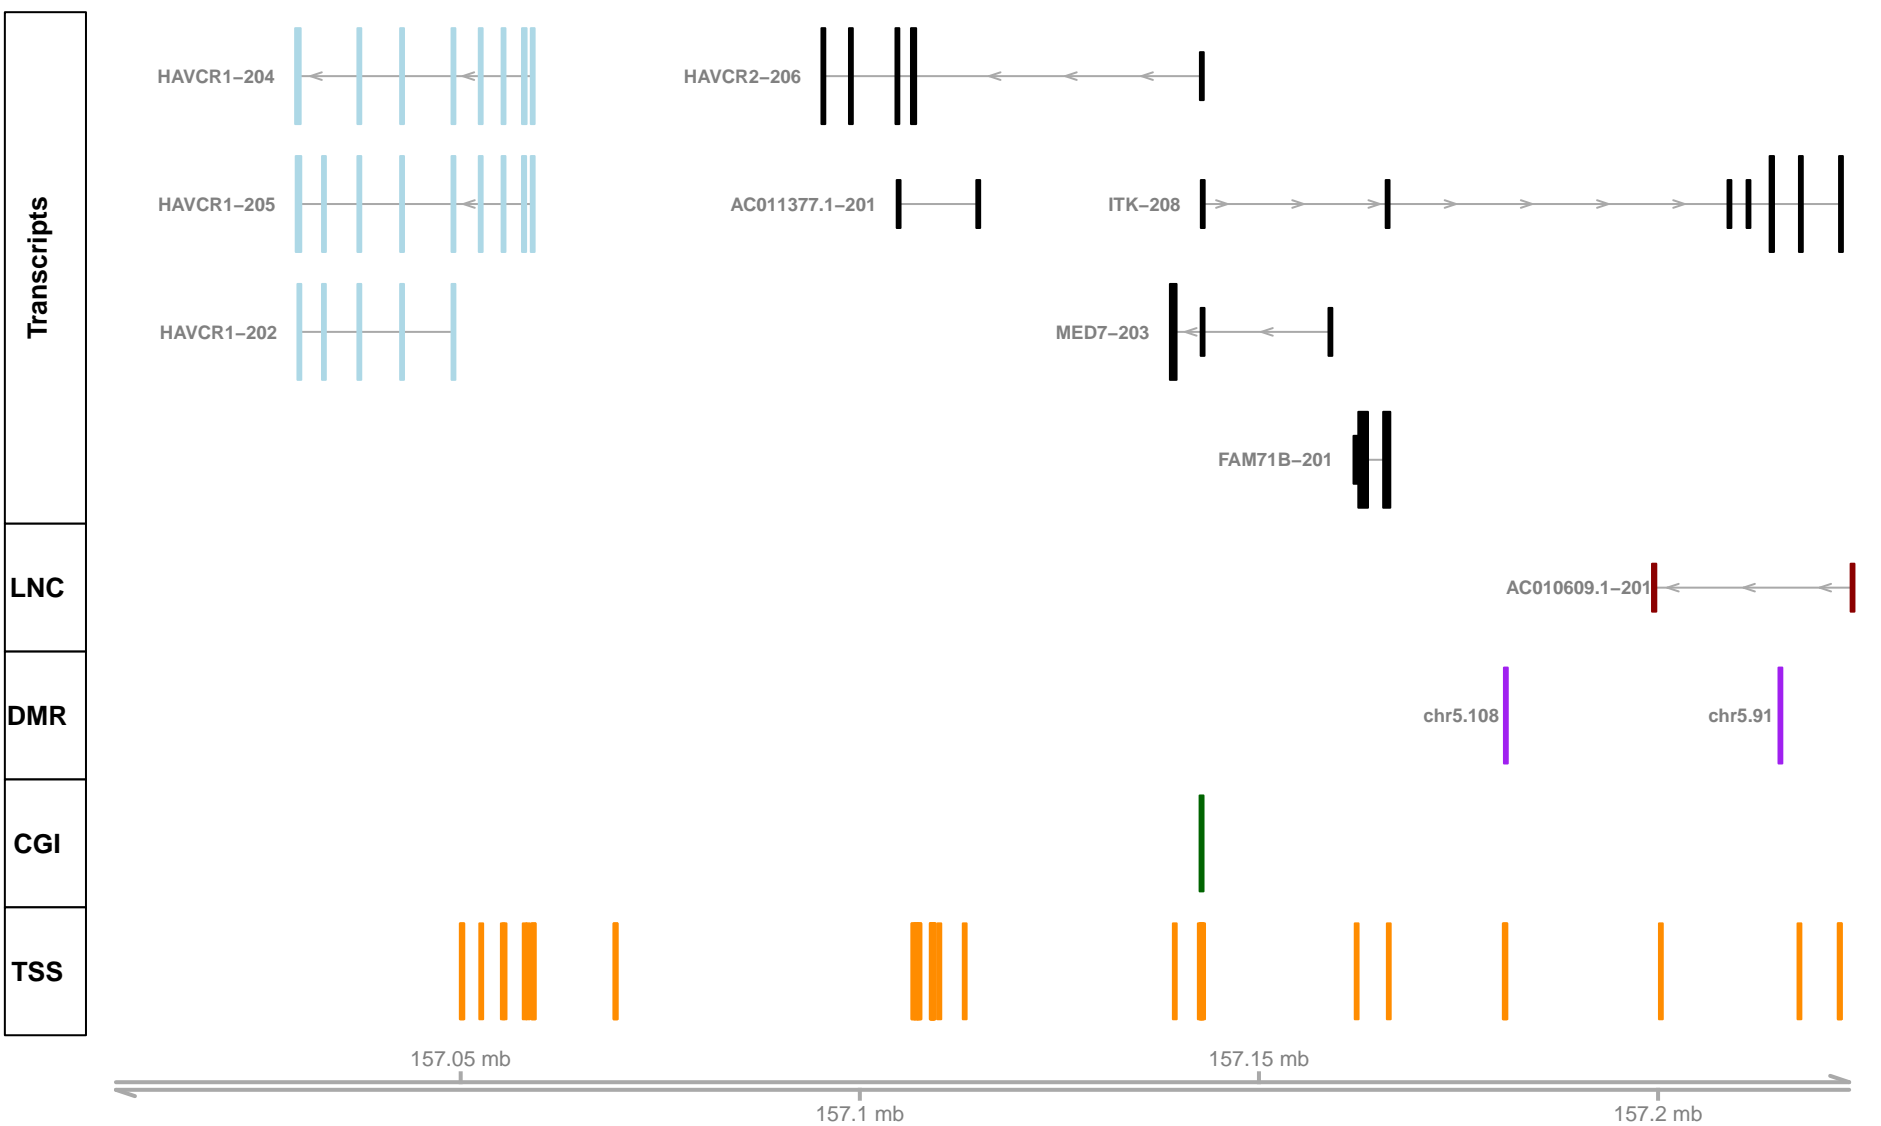

chr5.108

chr5.91

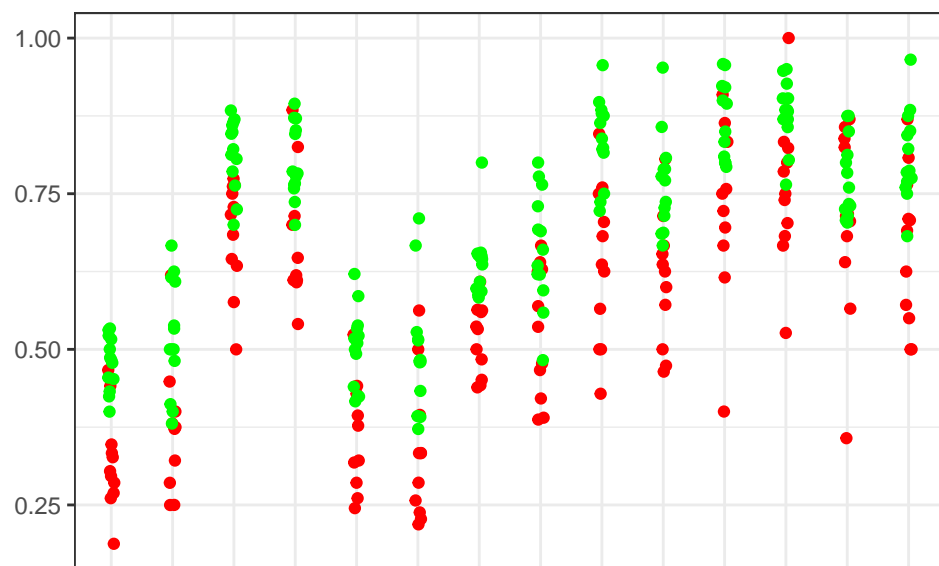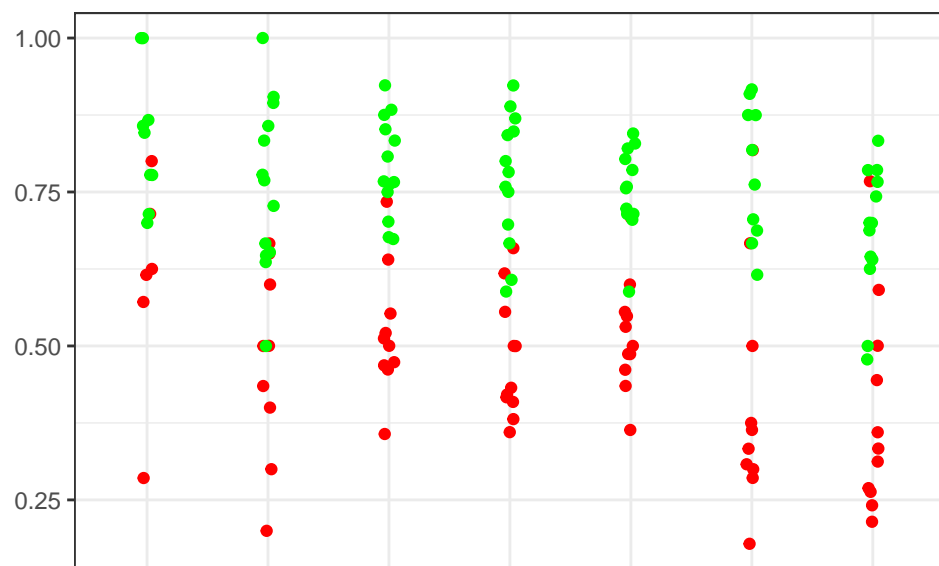

## AC012236.1

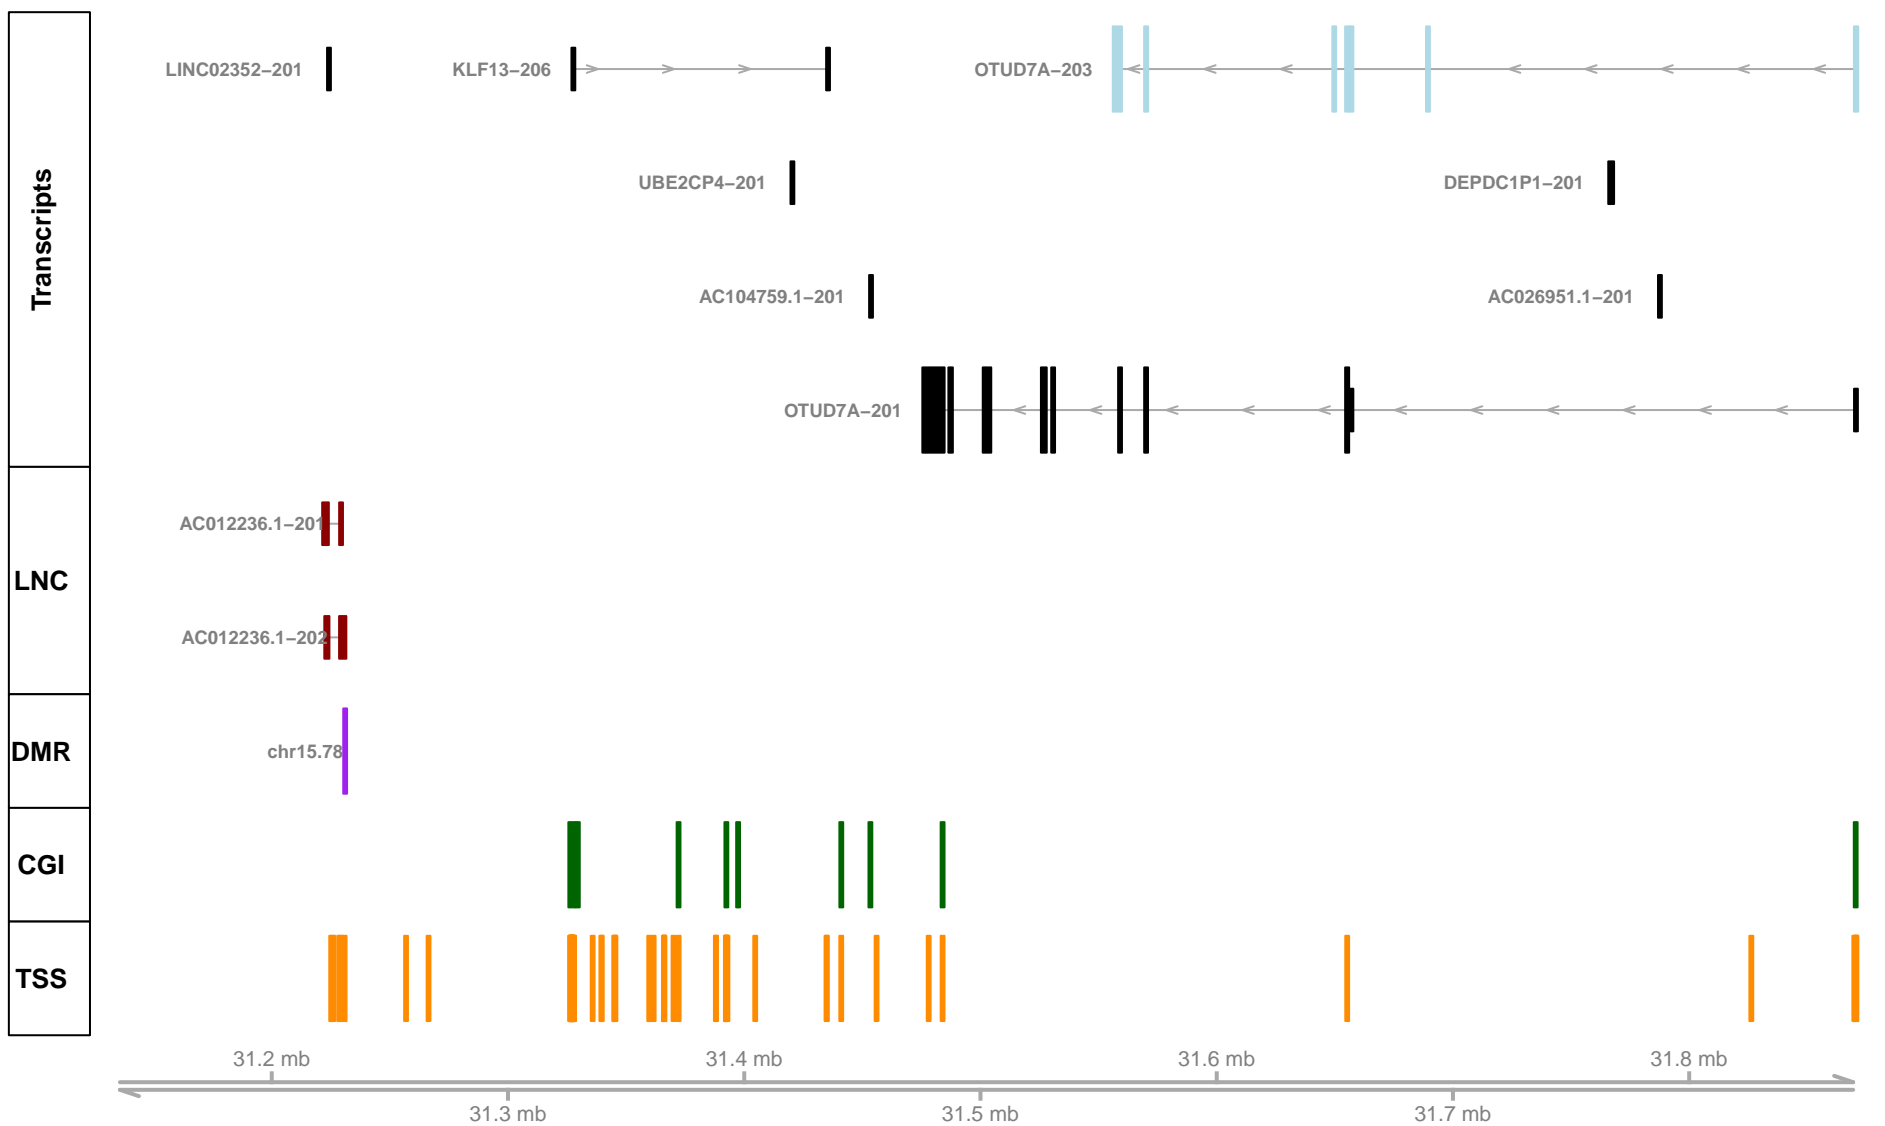

## chr15.78

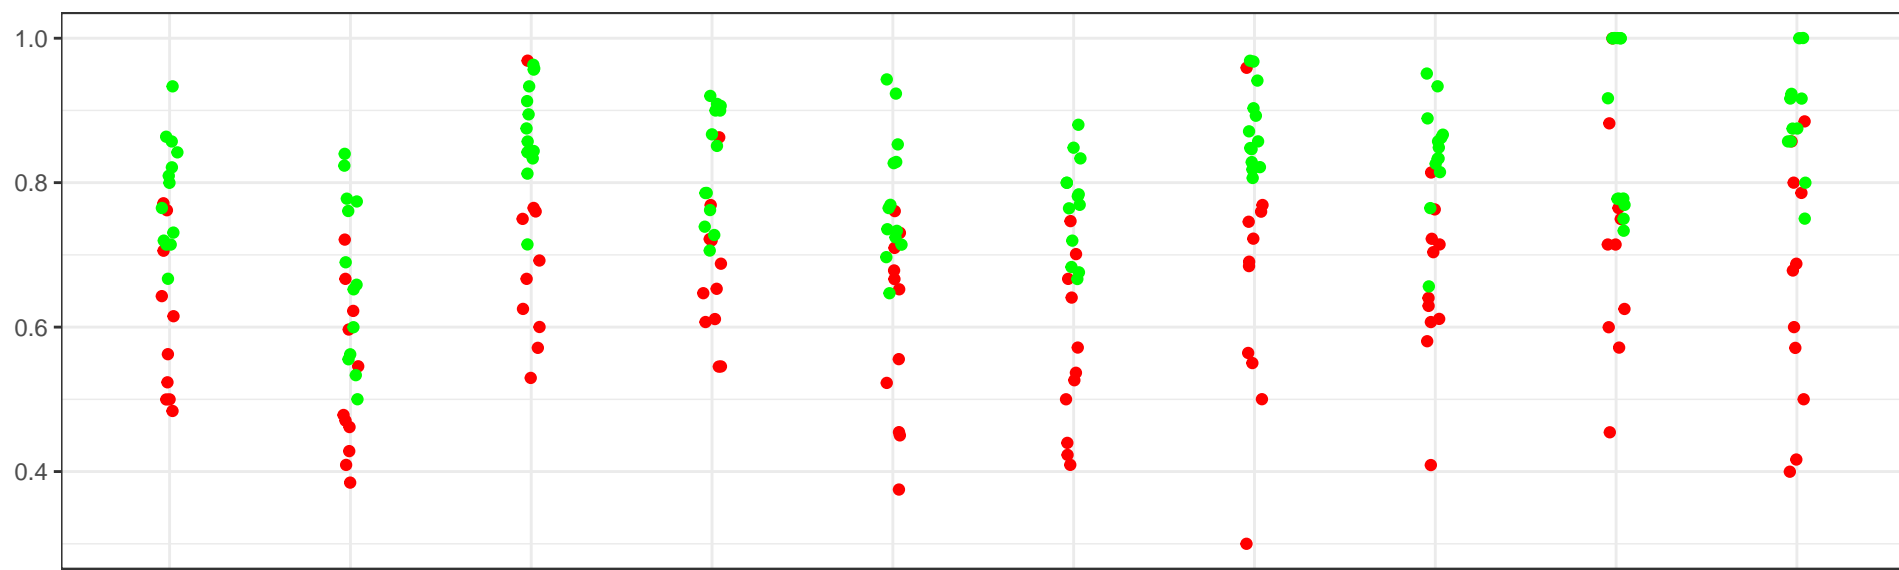

# AC012368.1

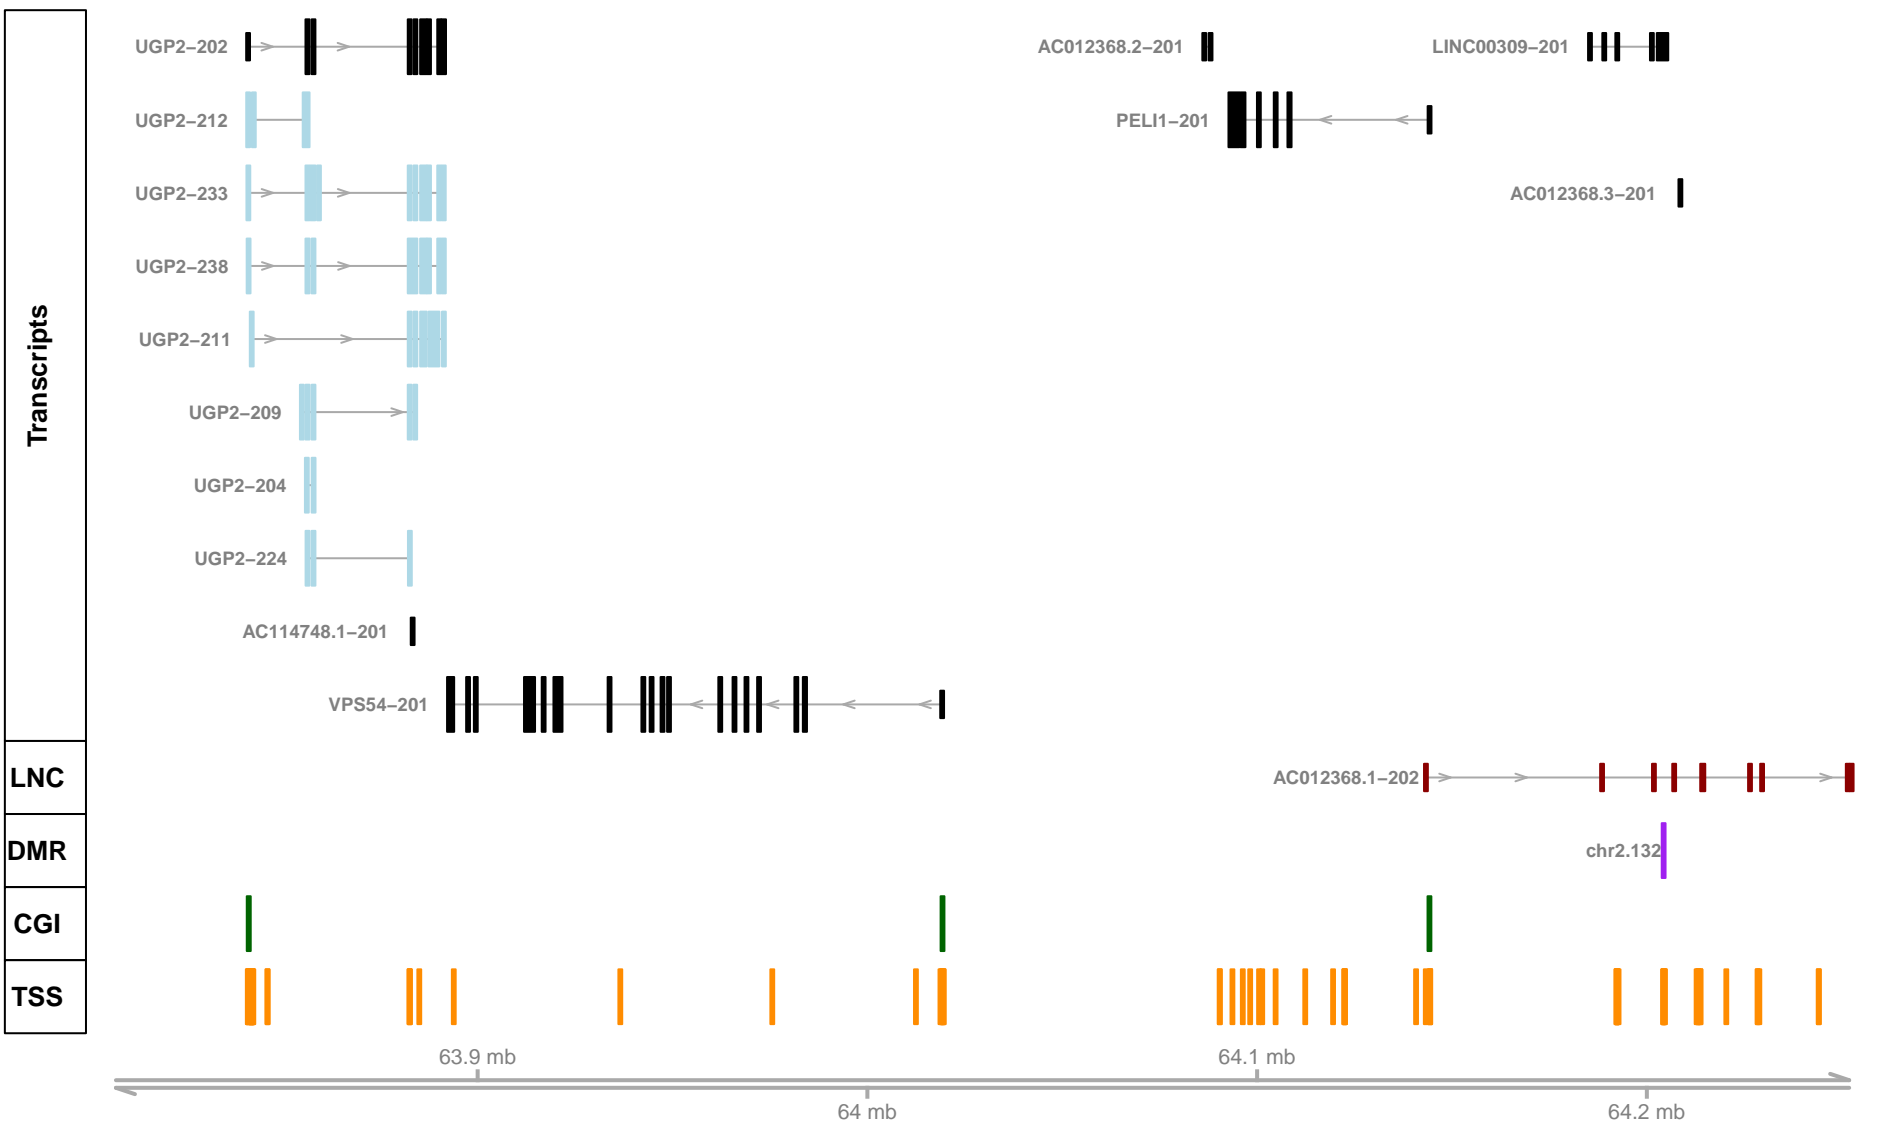

## chr2.132

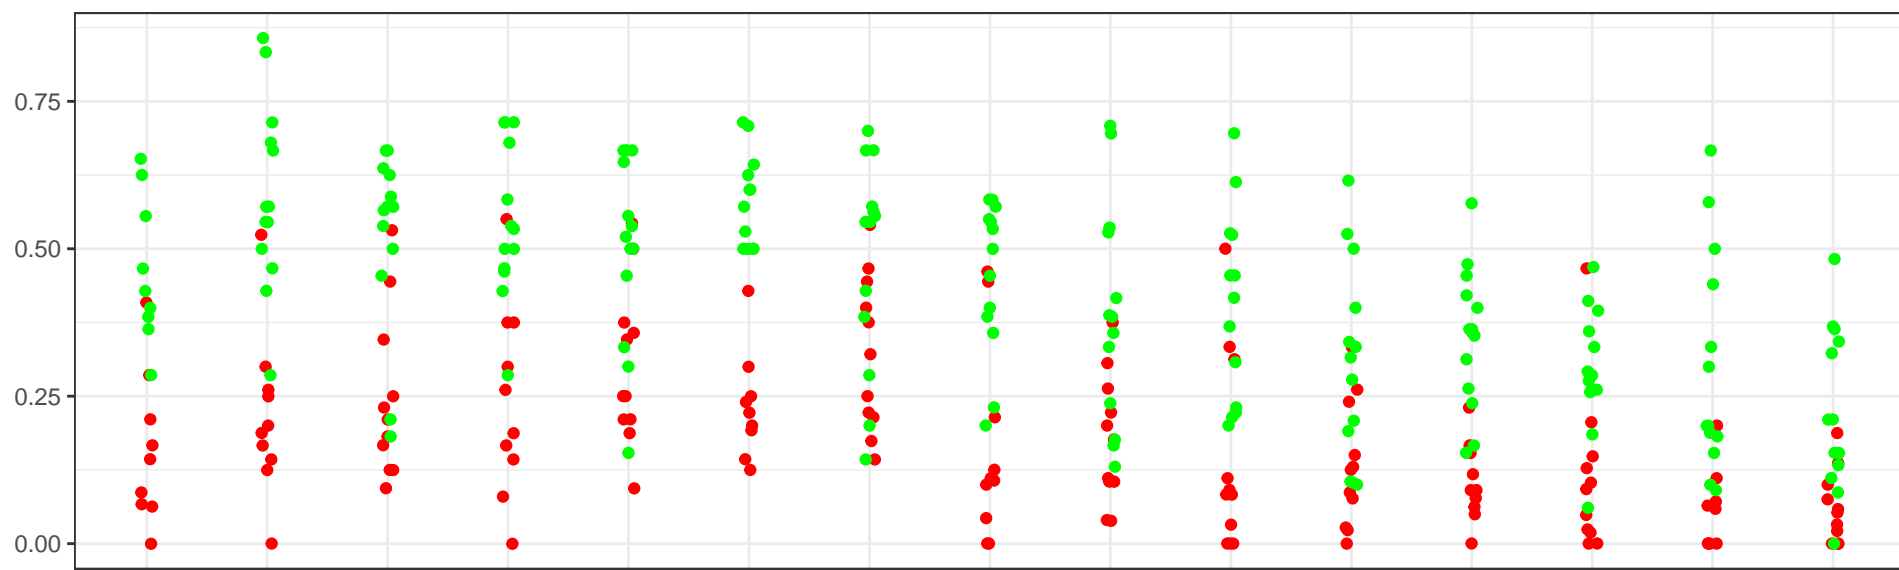

AC013553.3

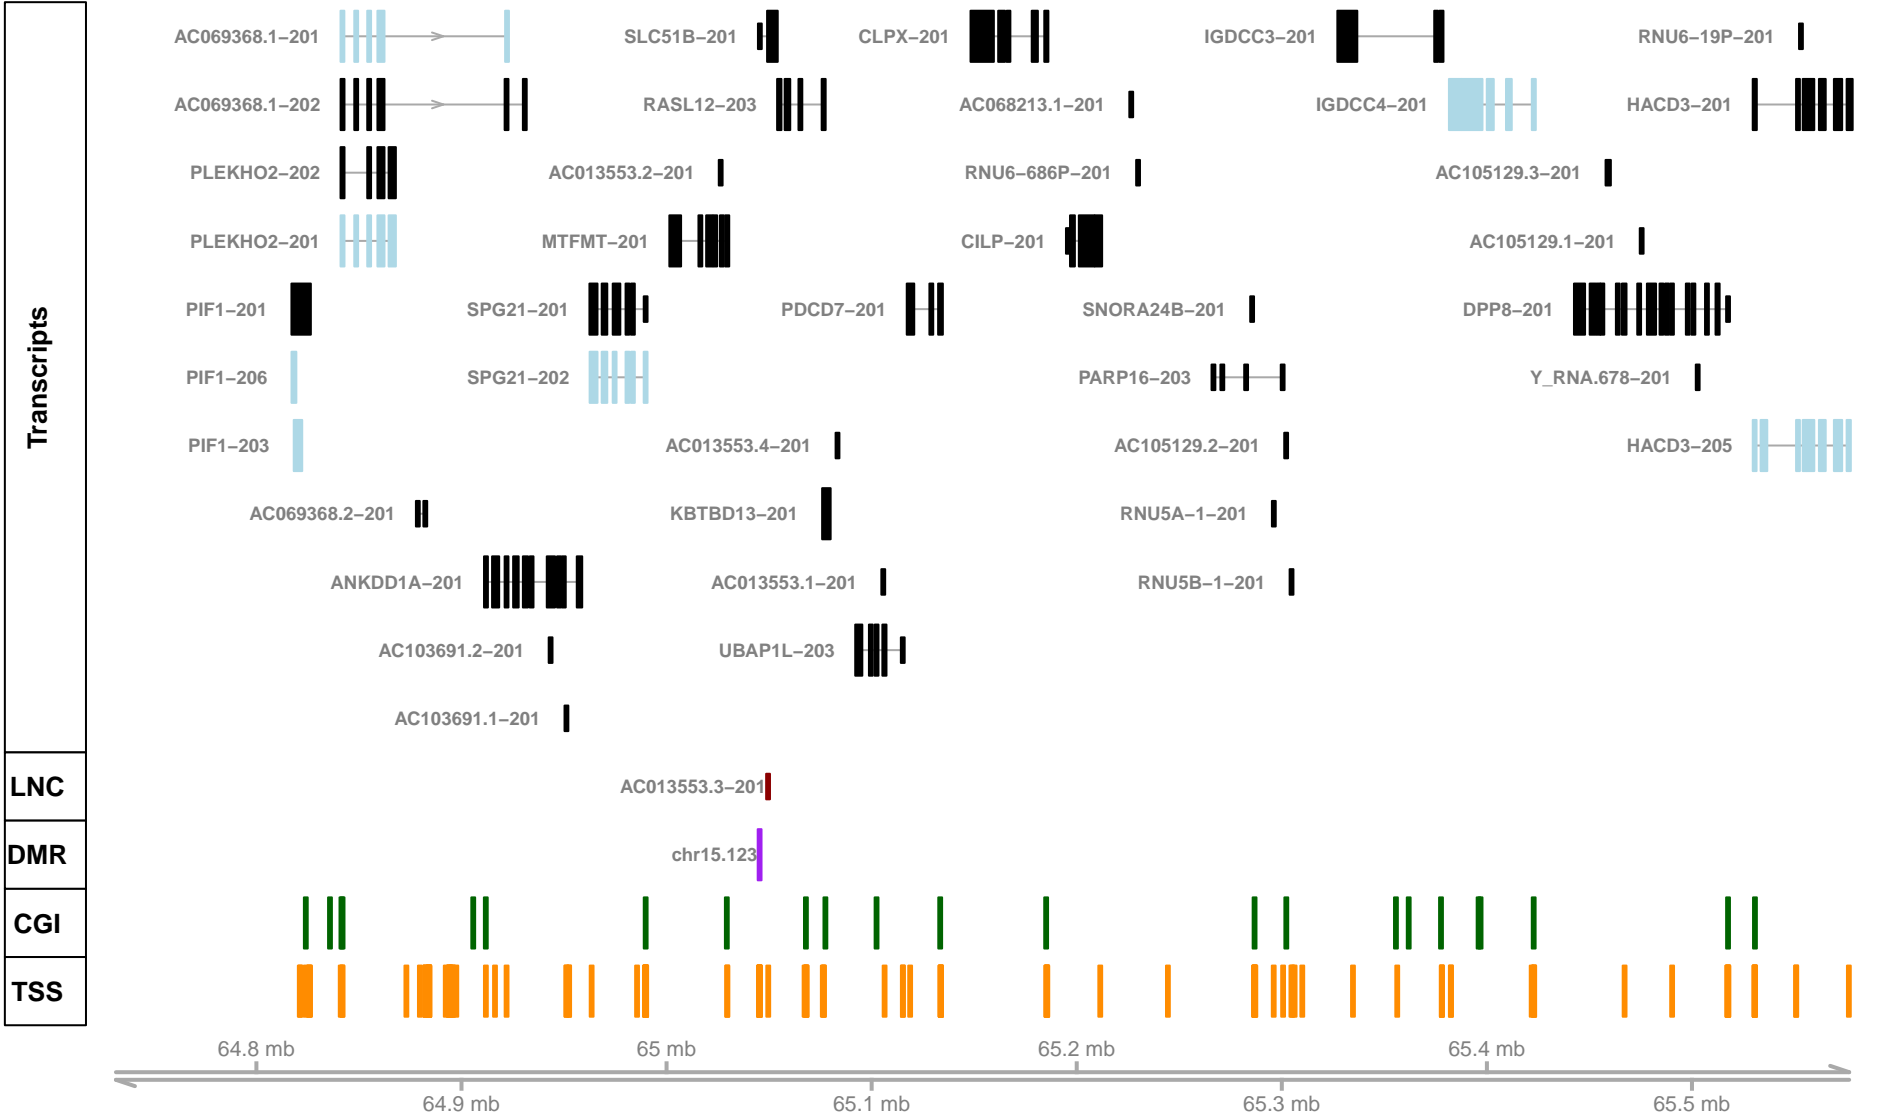

chr15.123

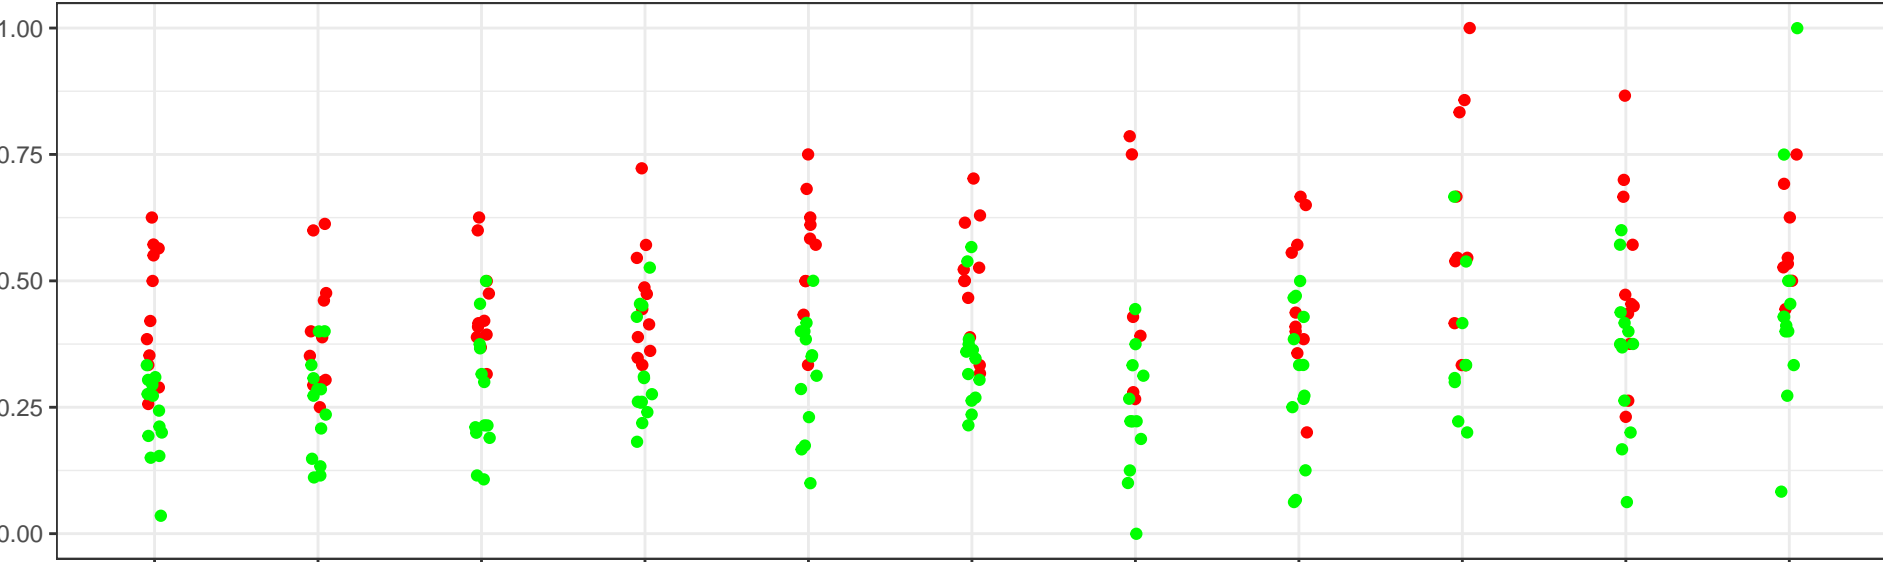

AC016831.6

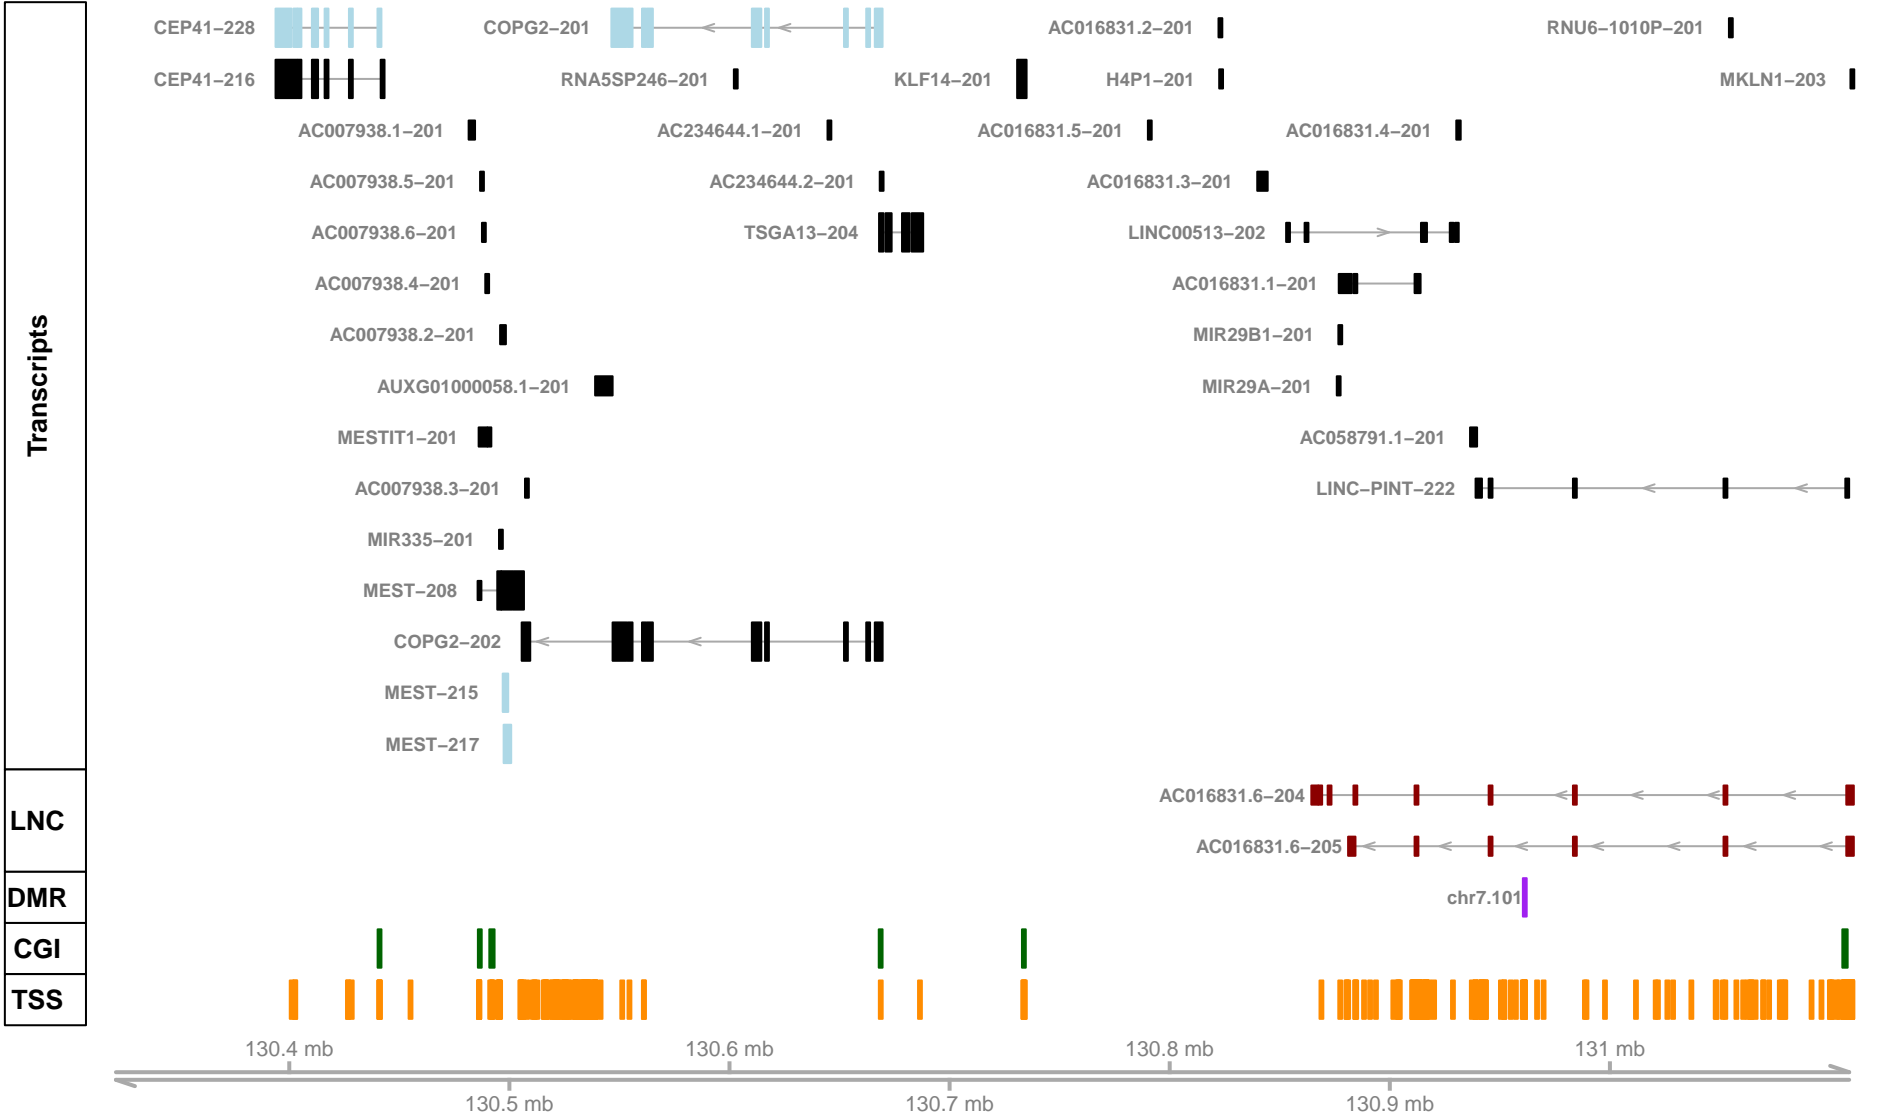

chr7.101

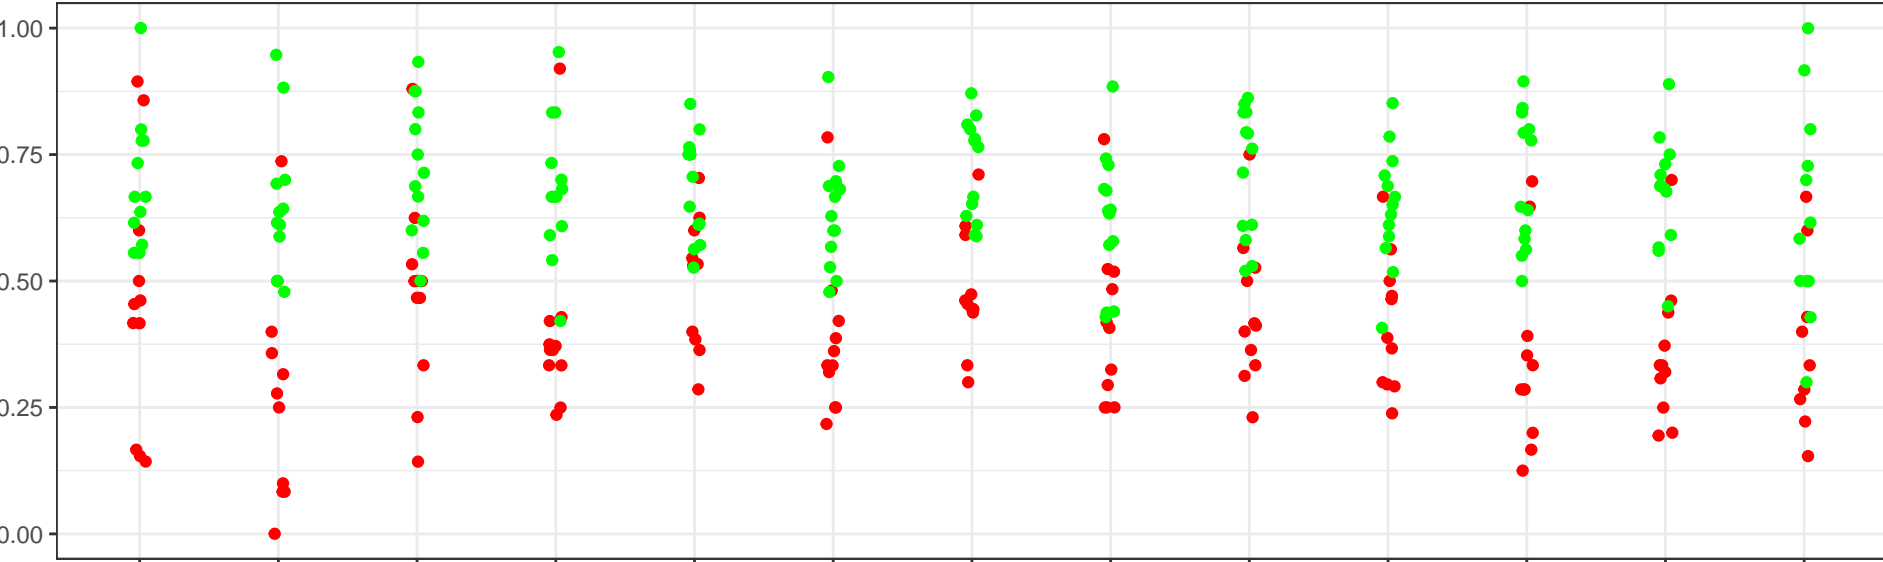

# AC018607.1

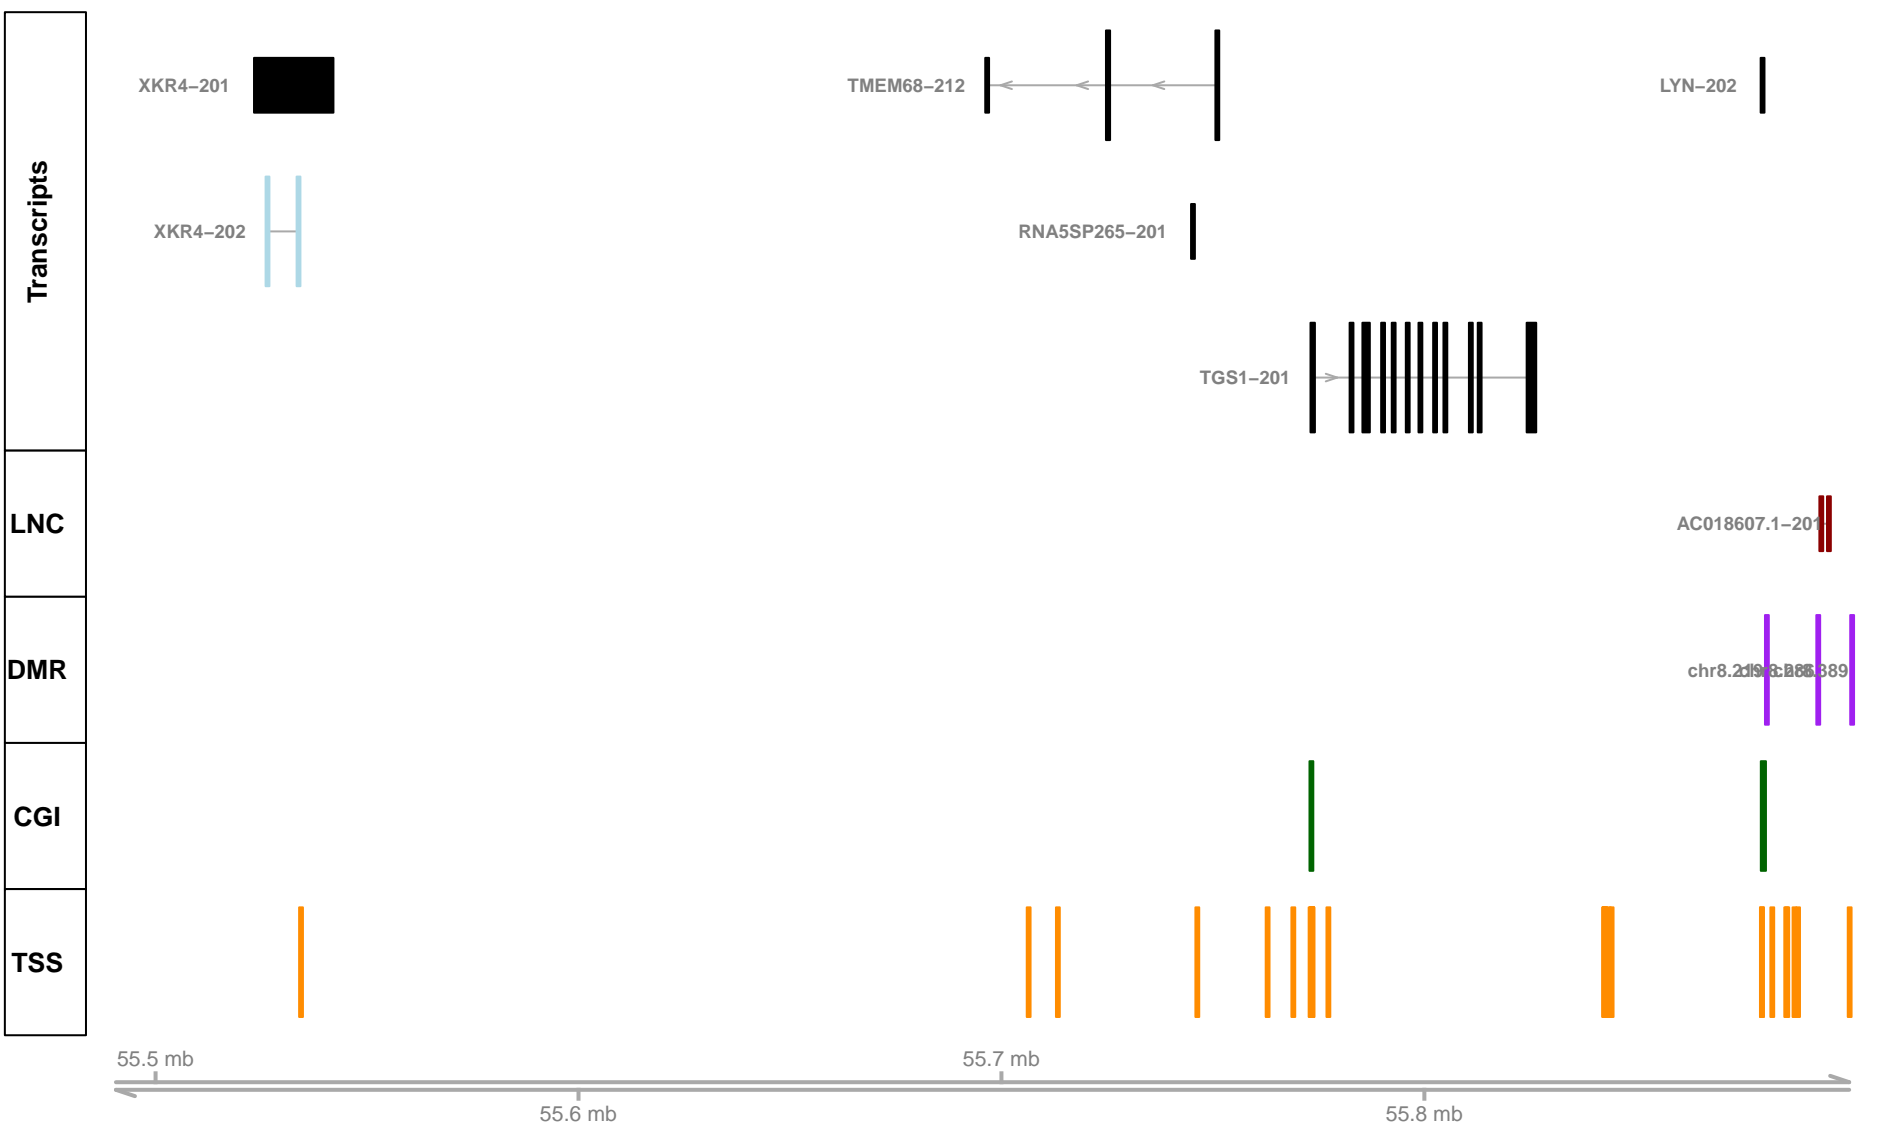

chr8.389

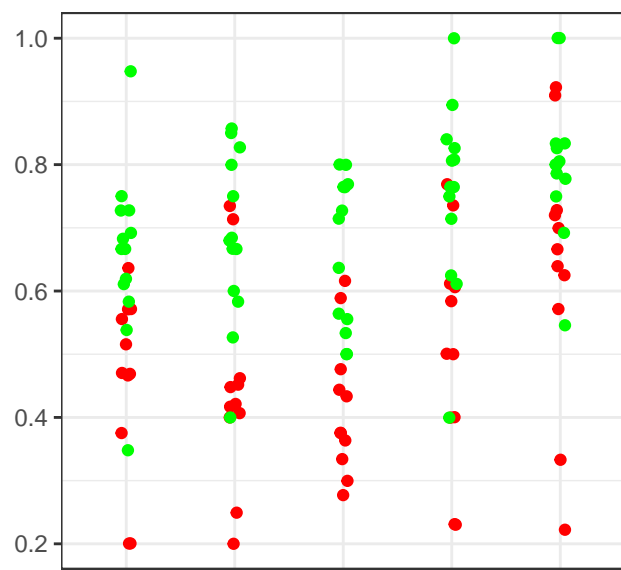

chr8.219

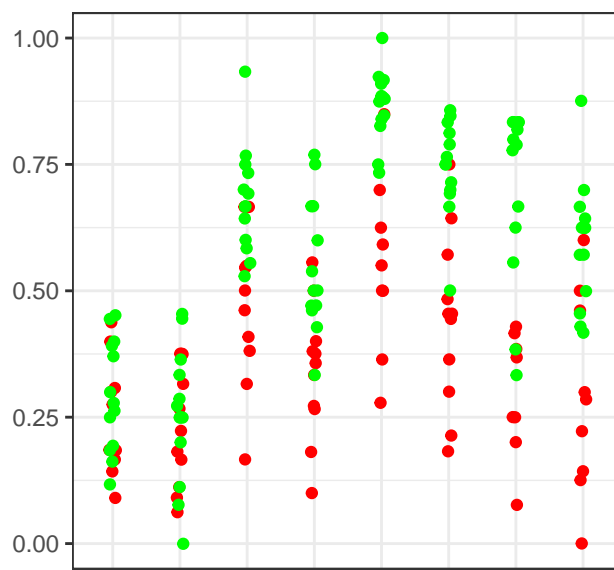

chr8.286

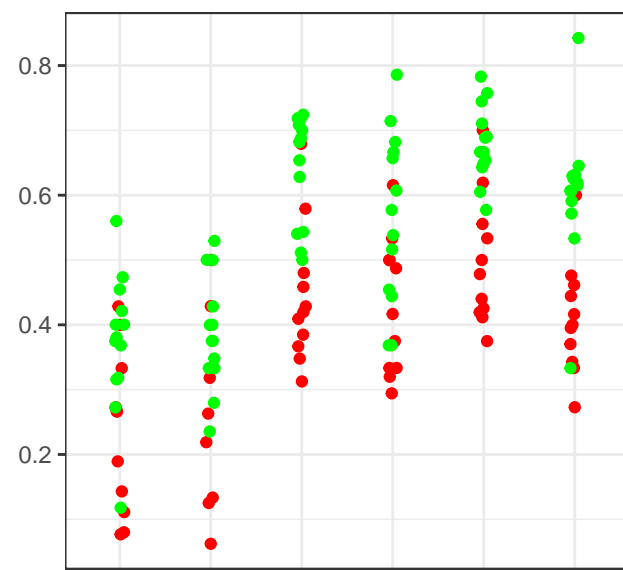

# AC020659.1

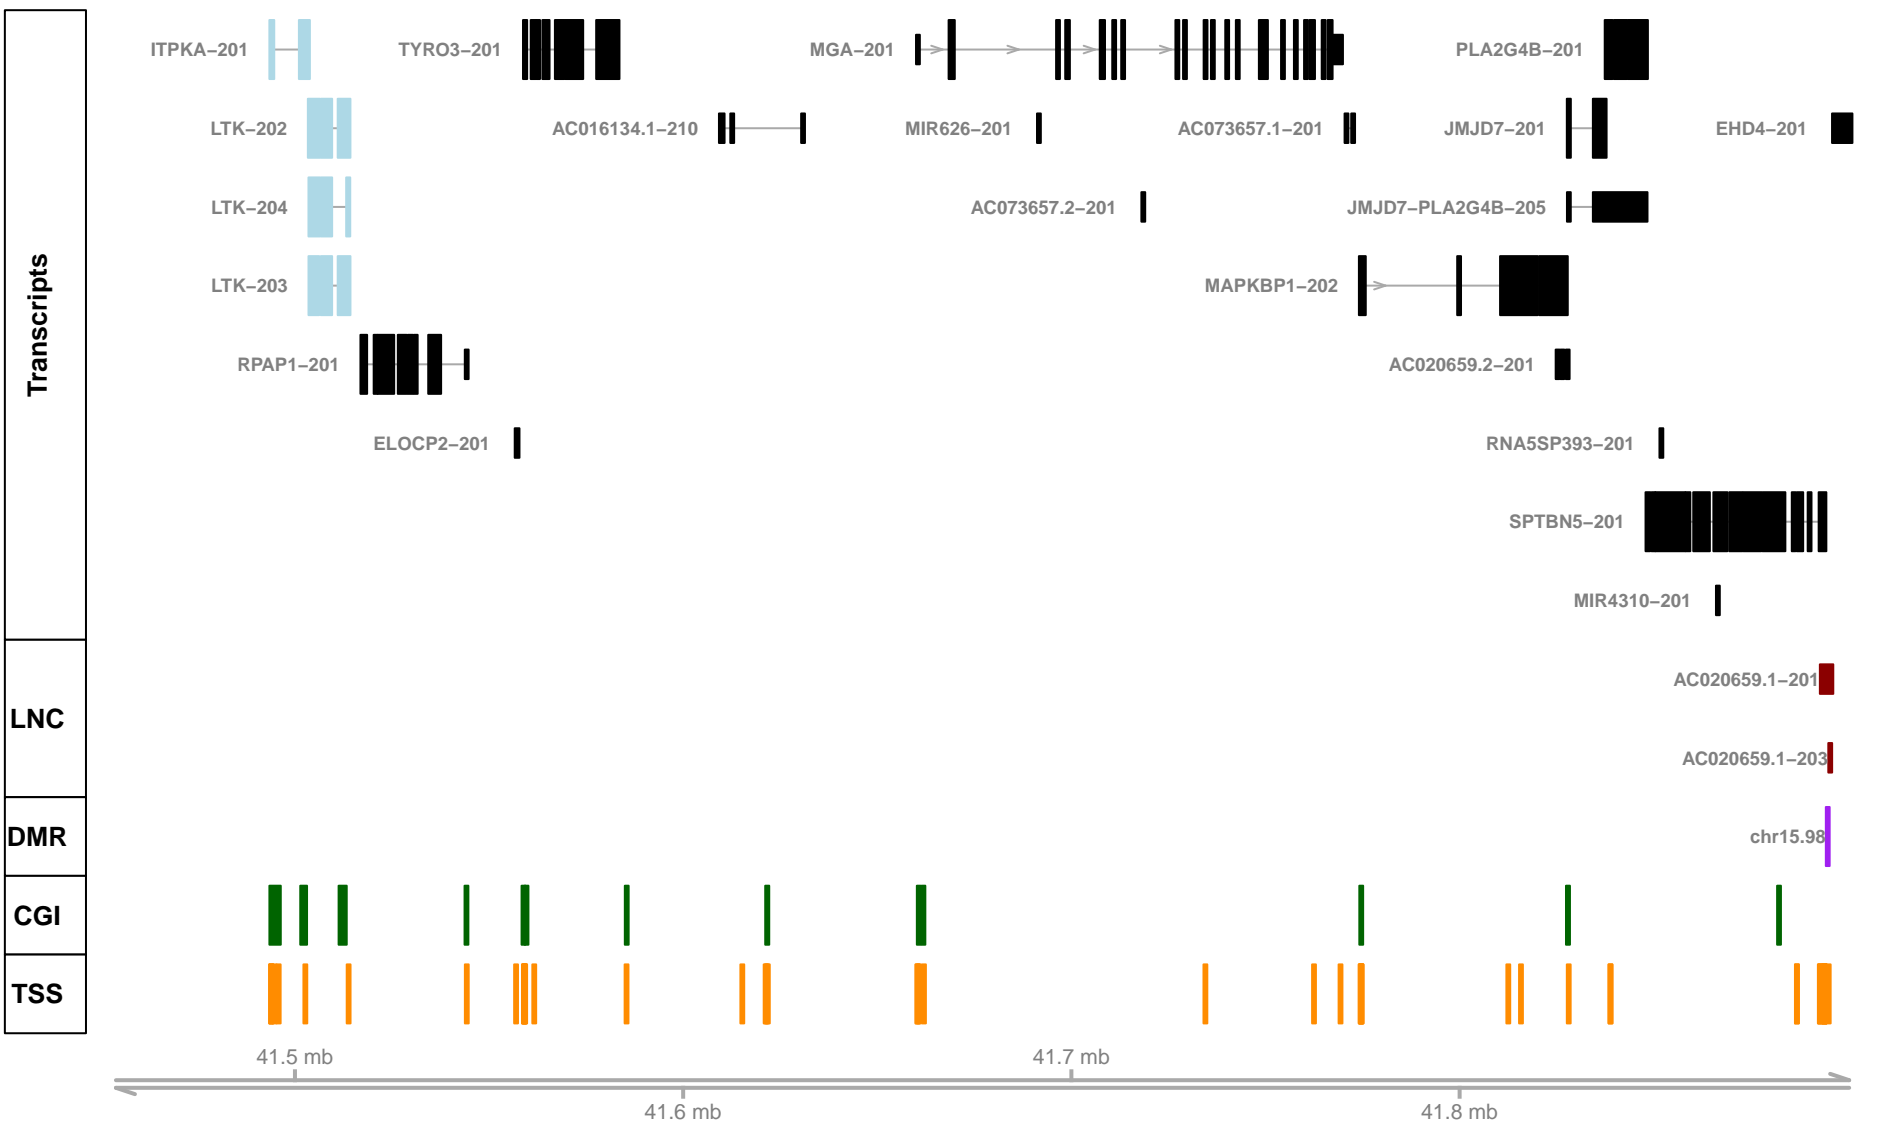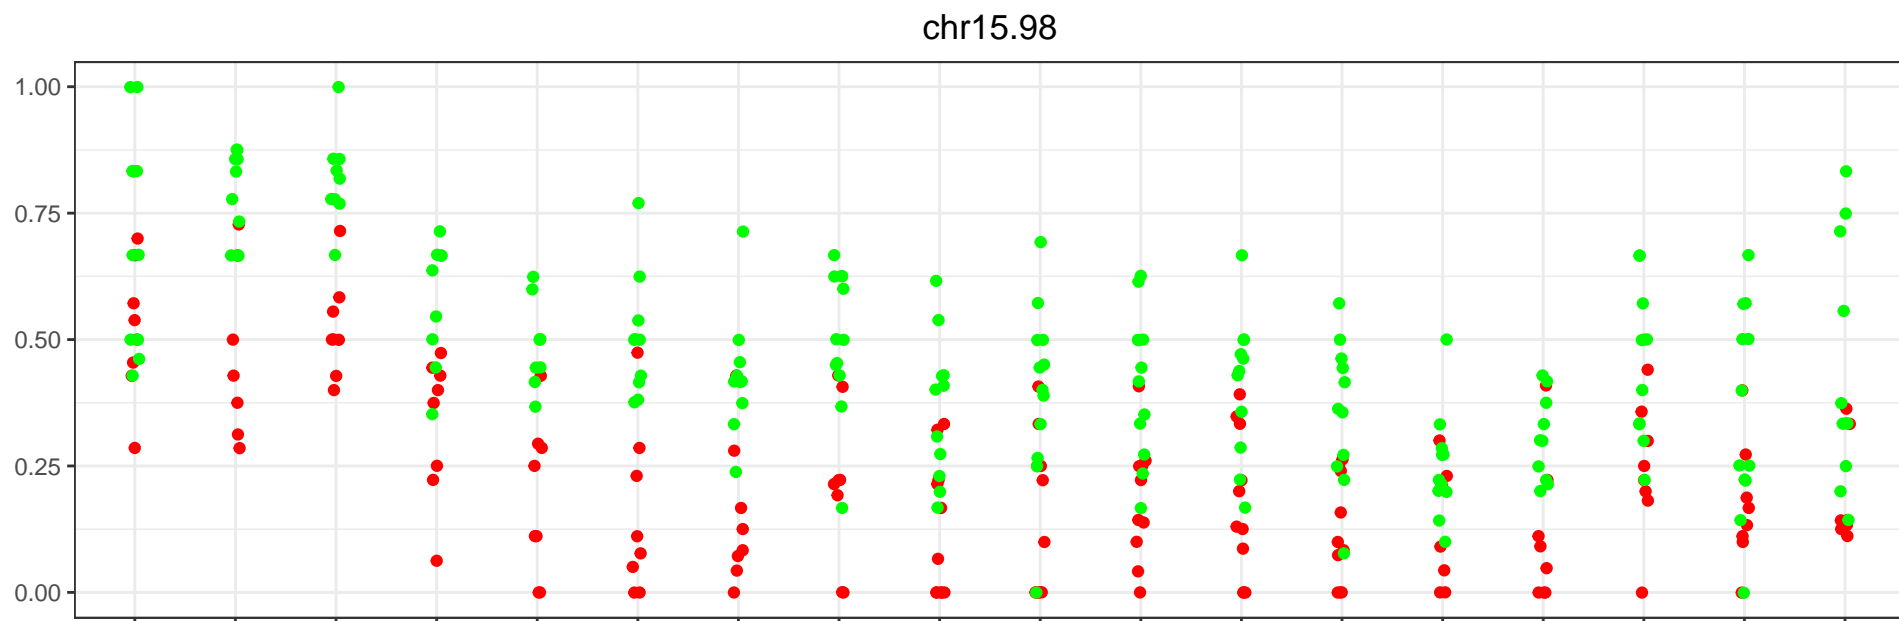

AC020931.1

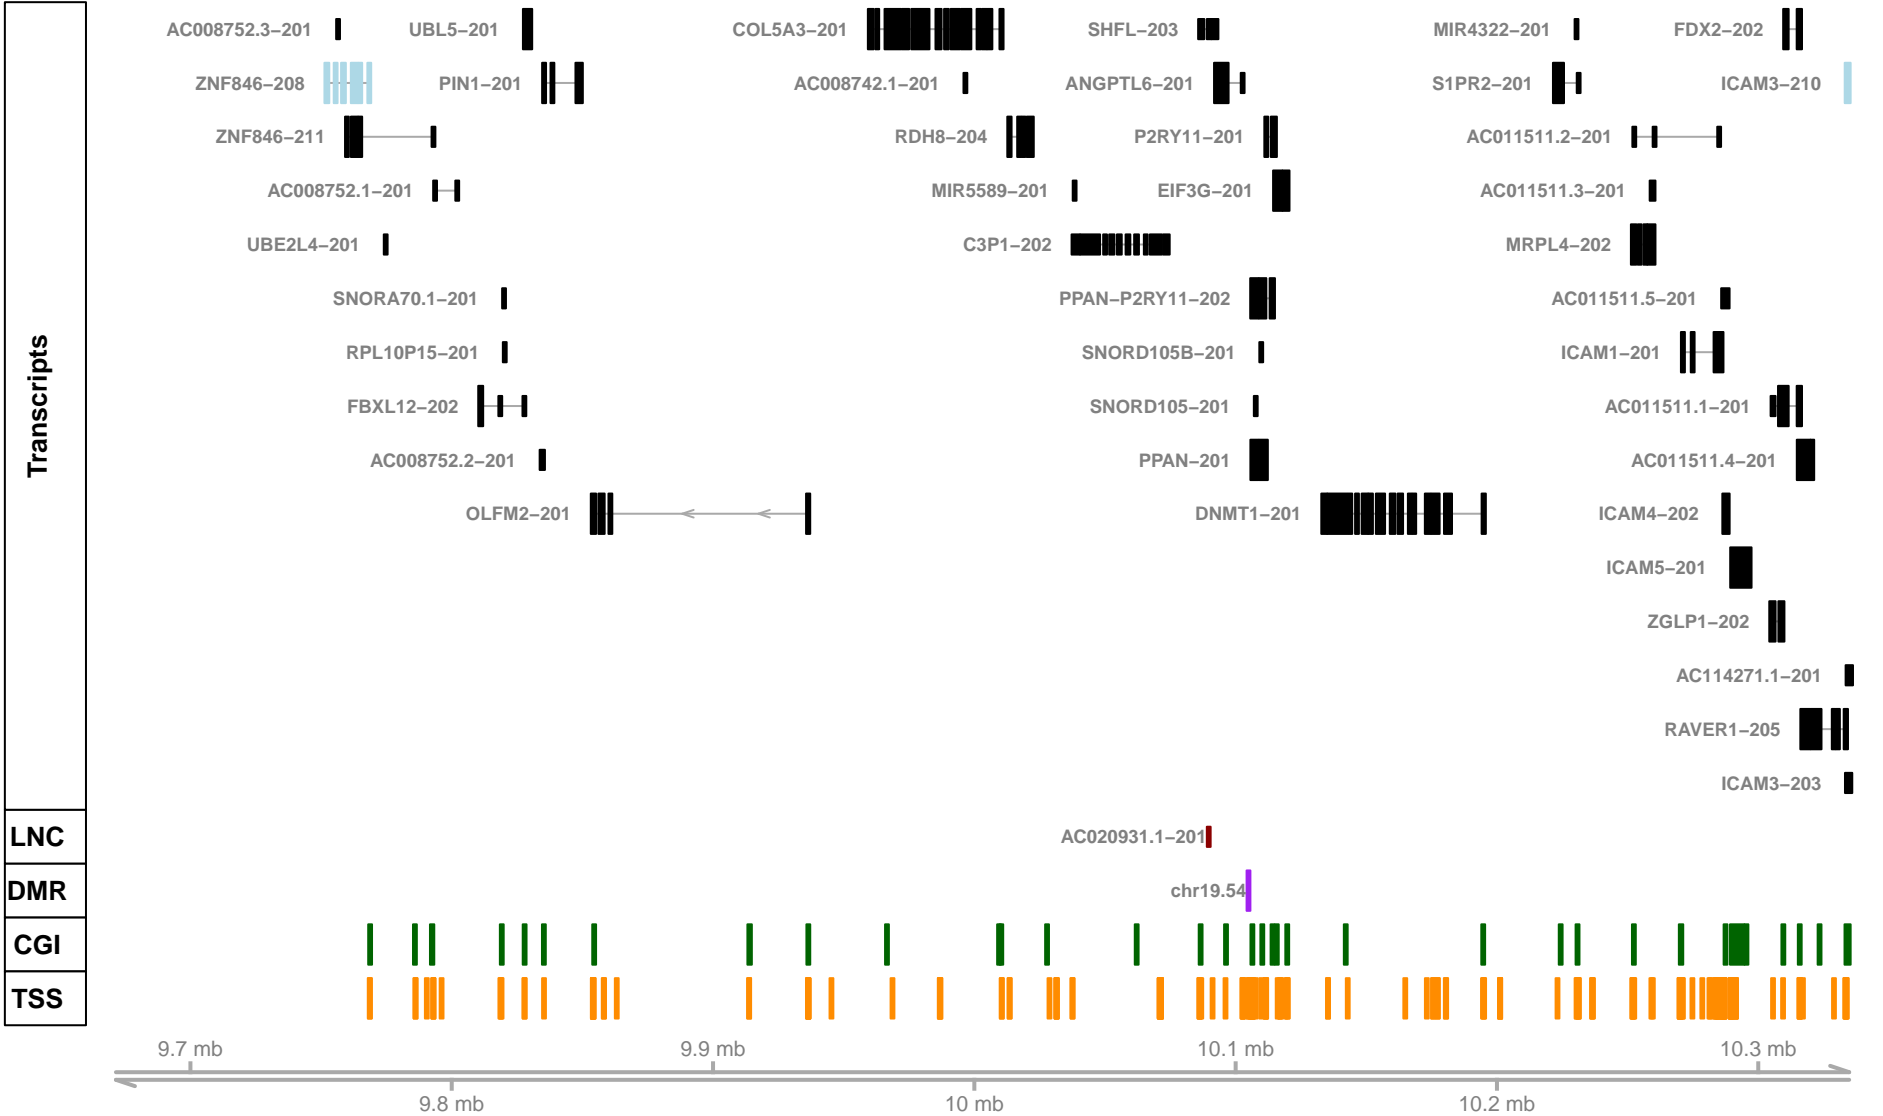

chr19.54

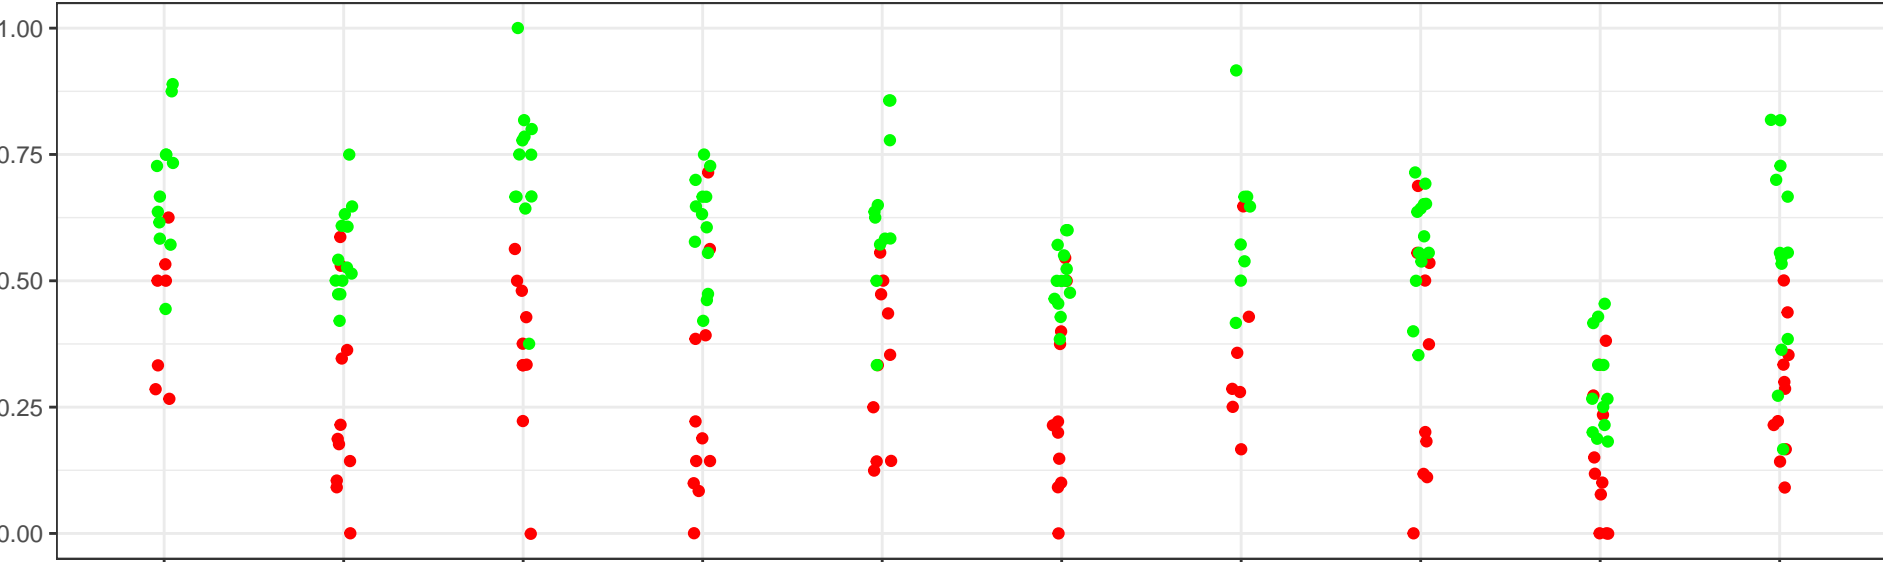

AC025576.2

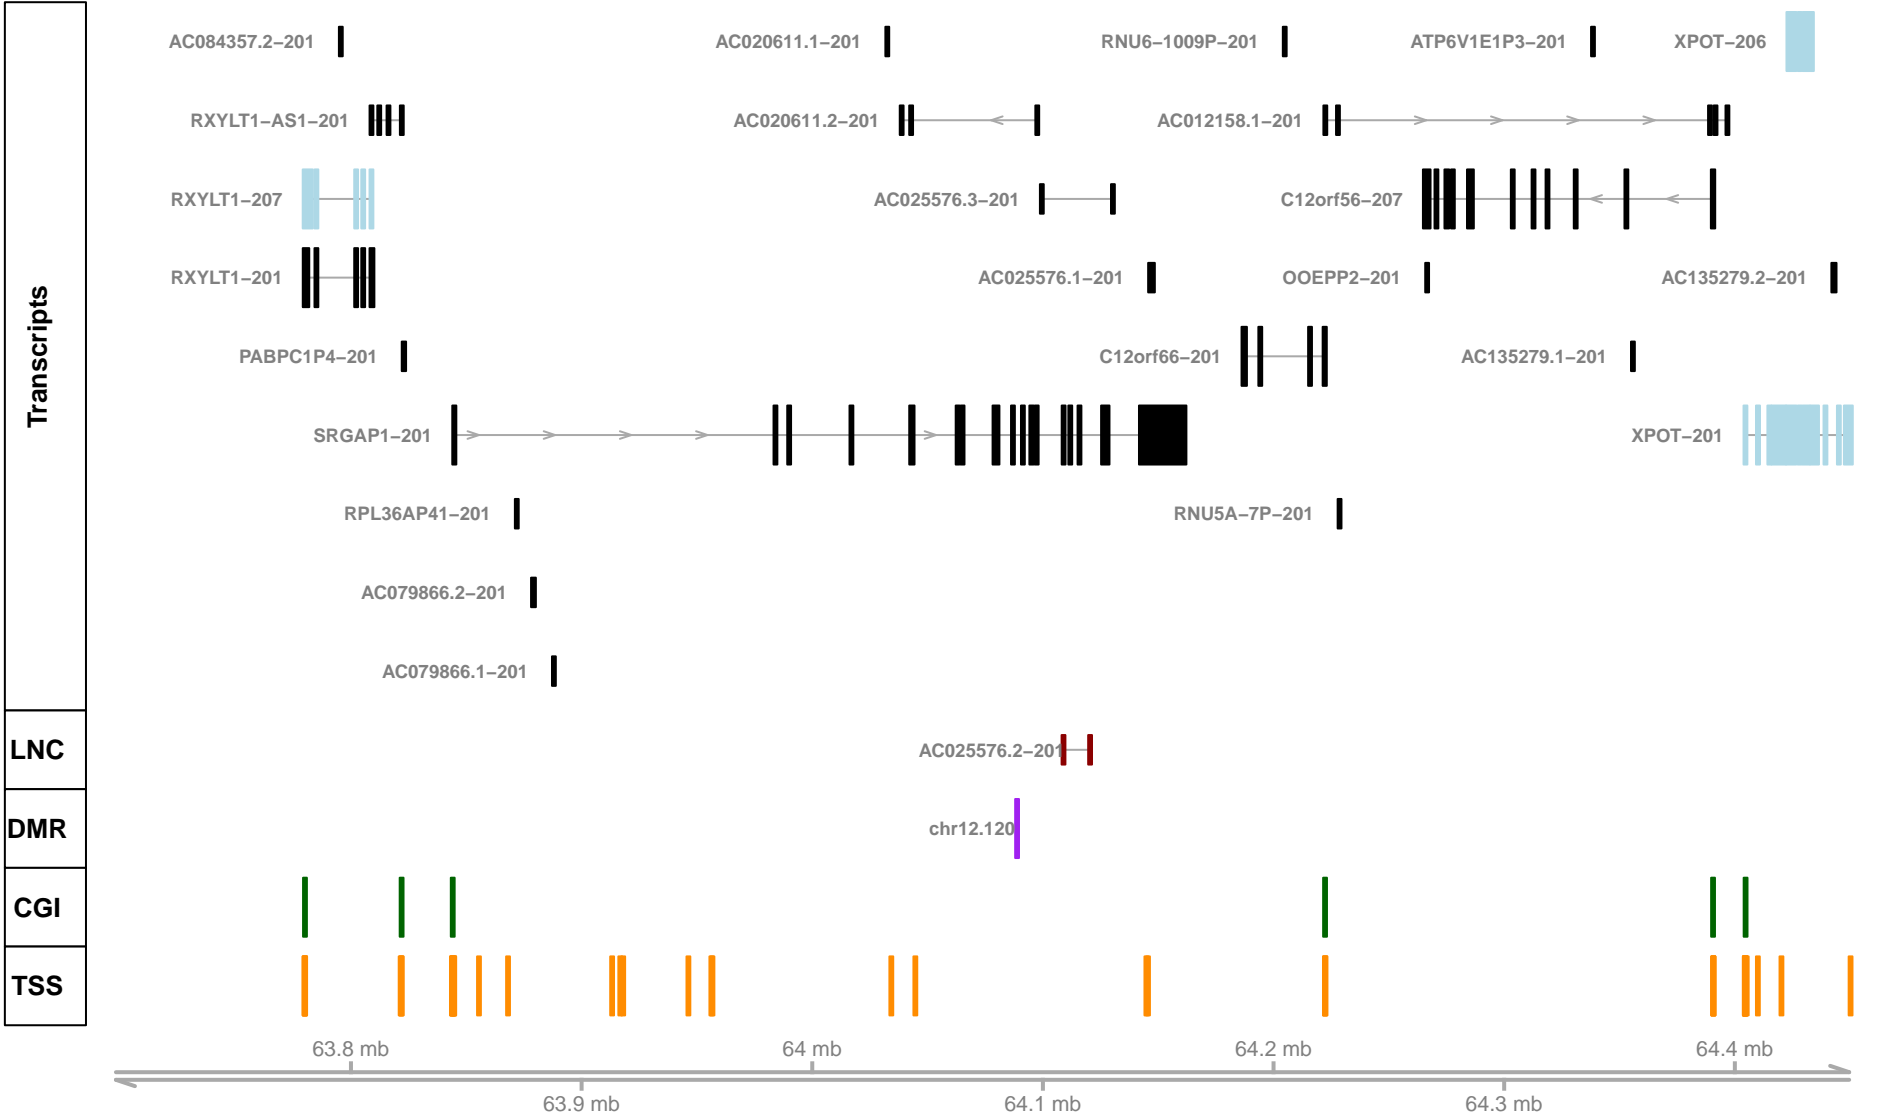

chr12.120

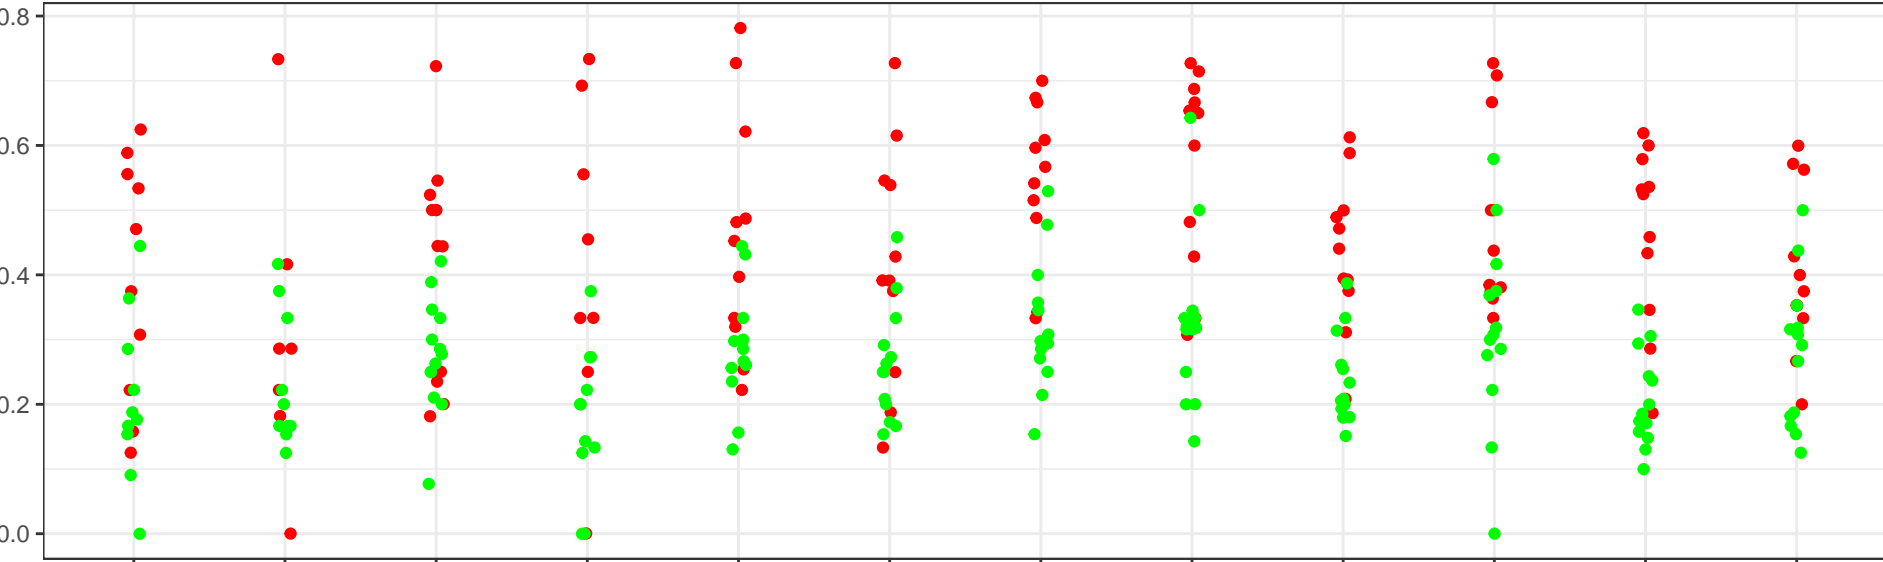

AC044810.2

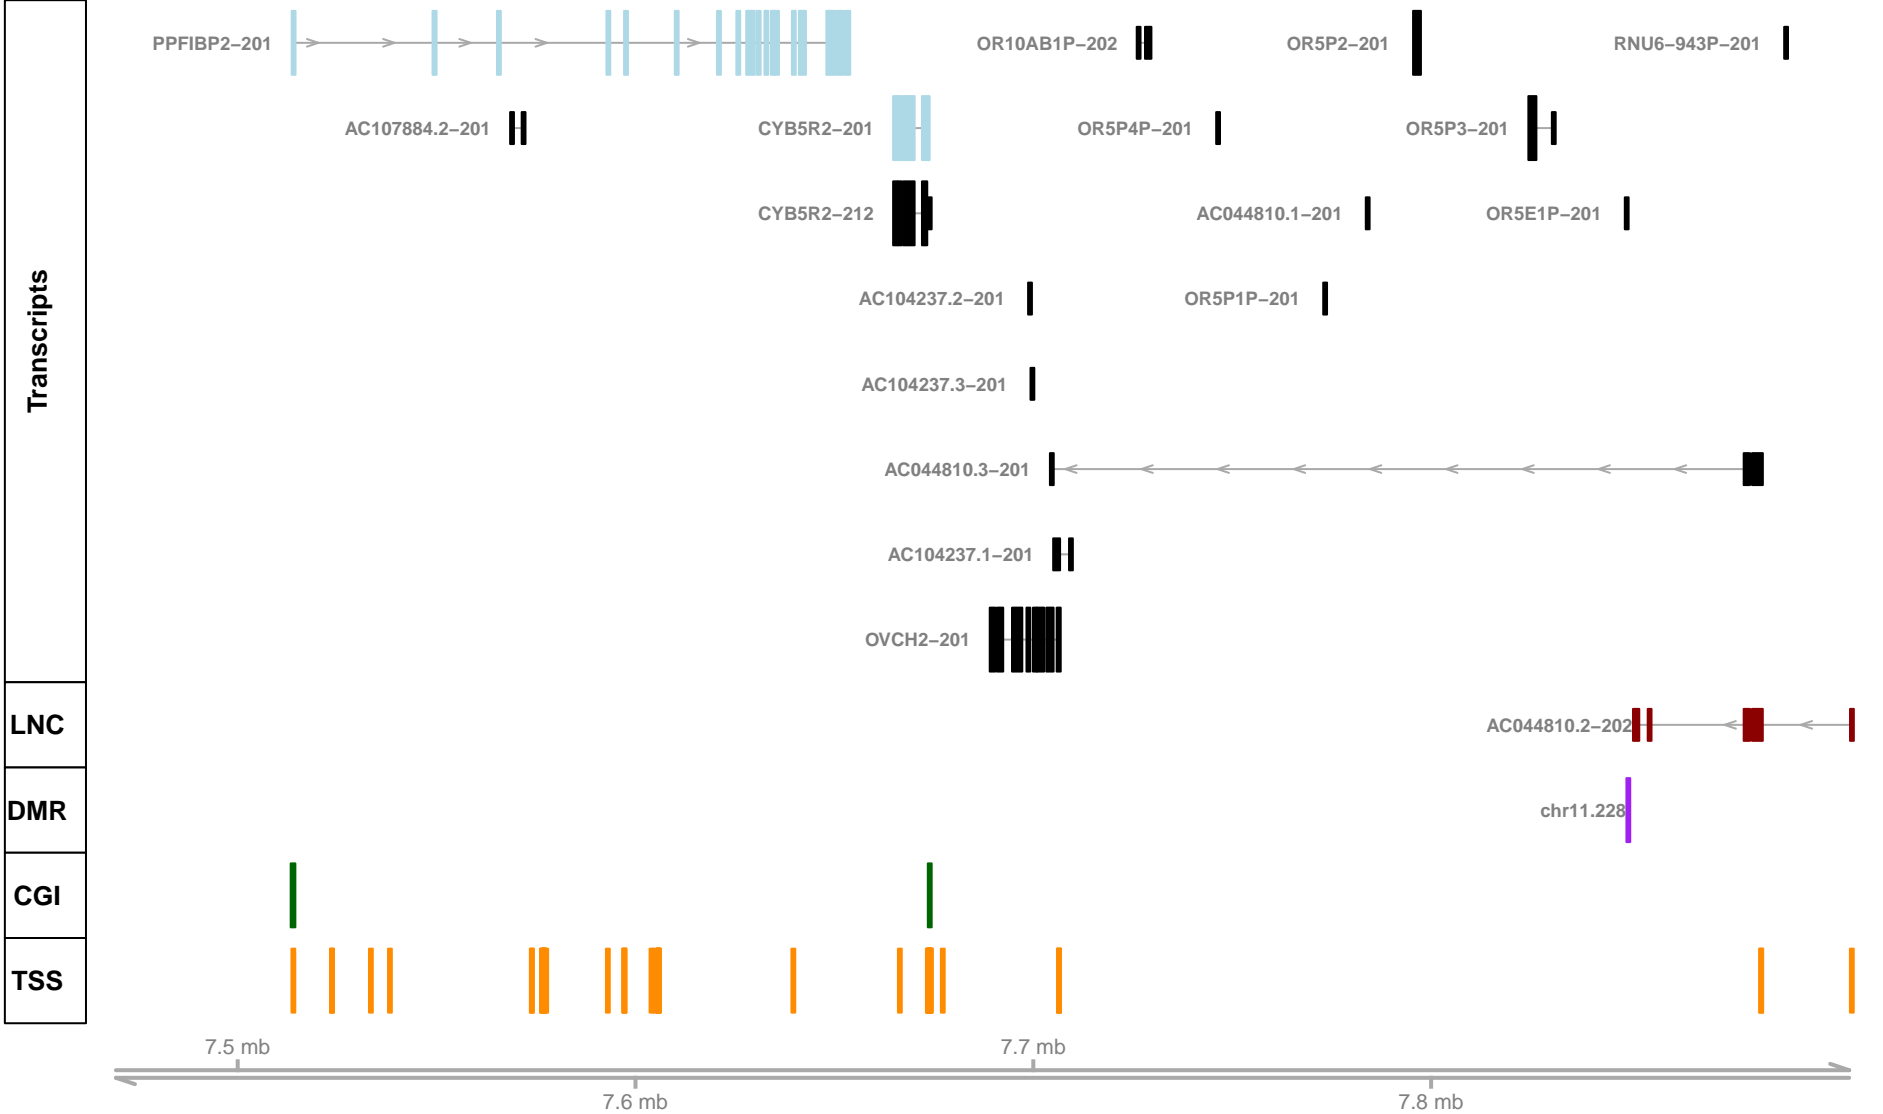

chr11.228

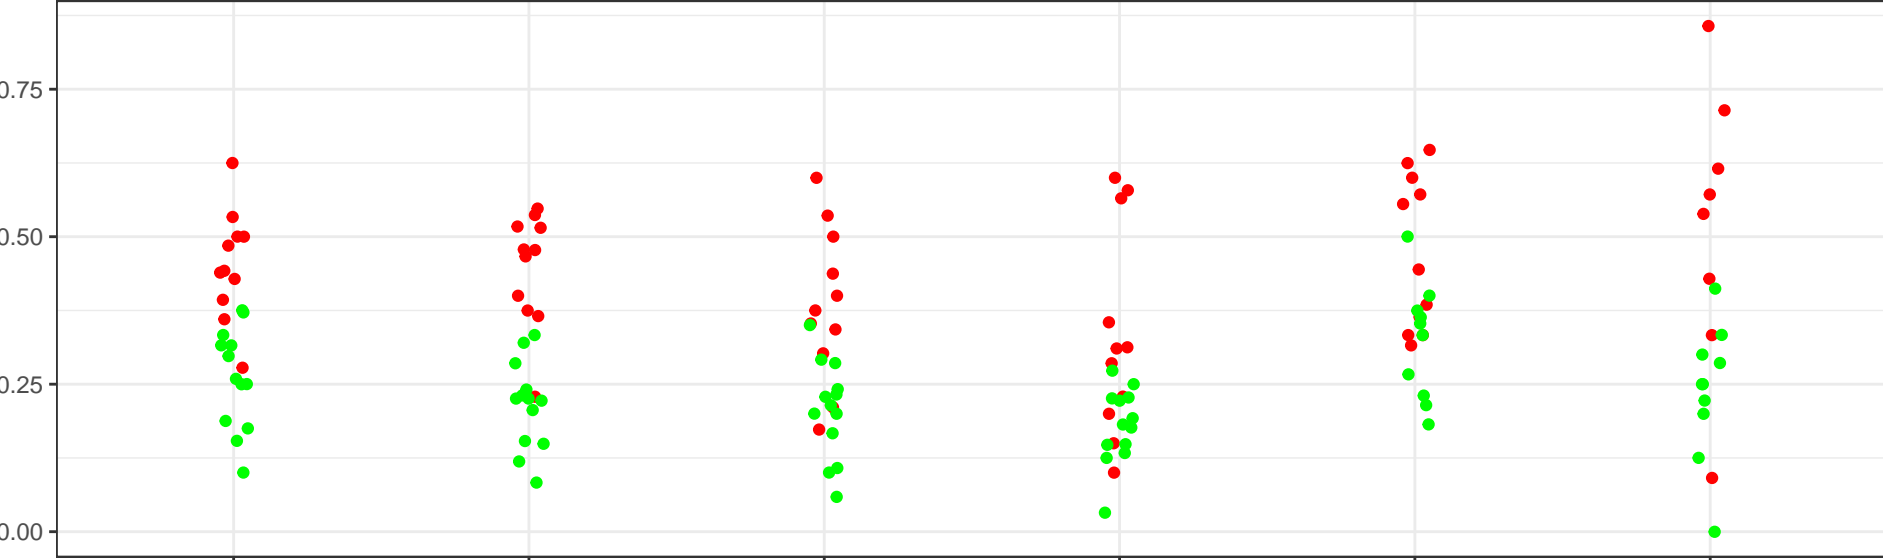

AC073655.2

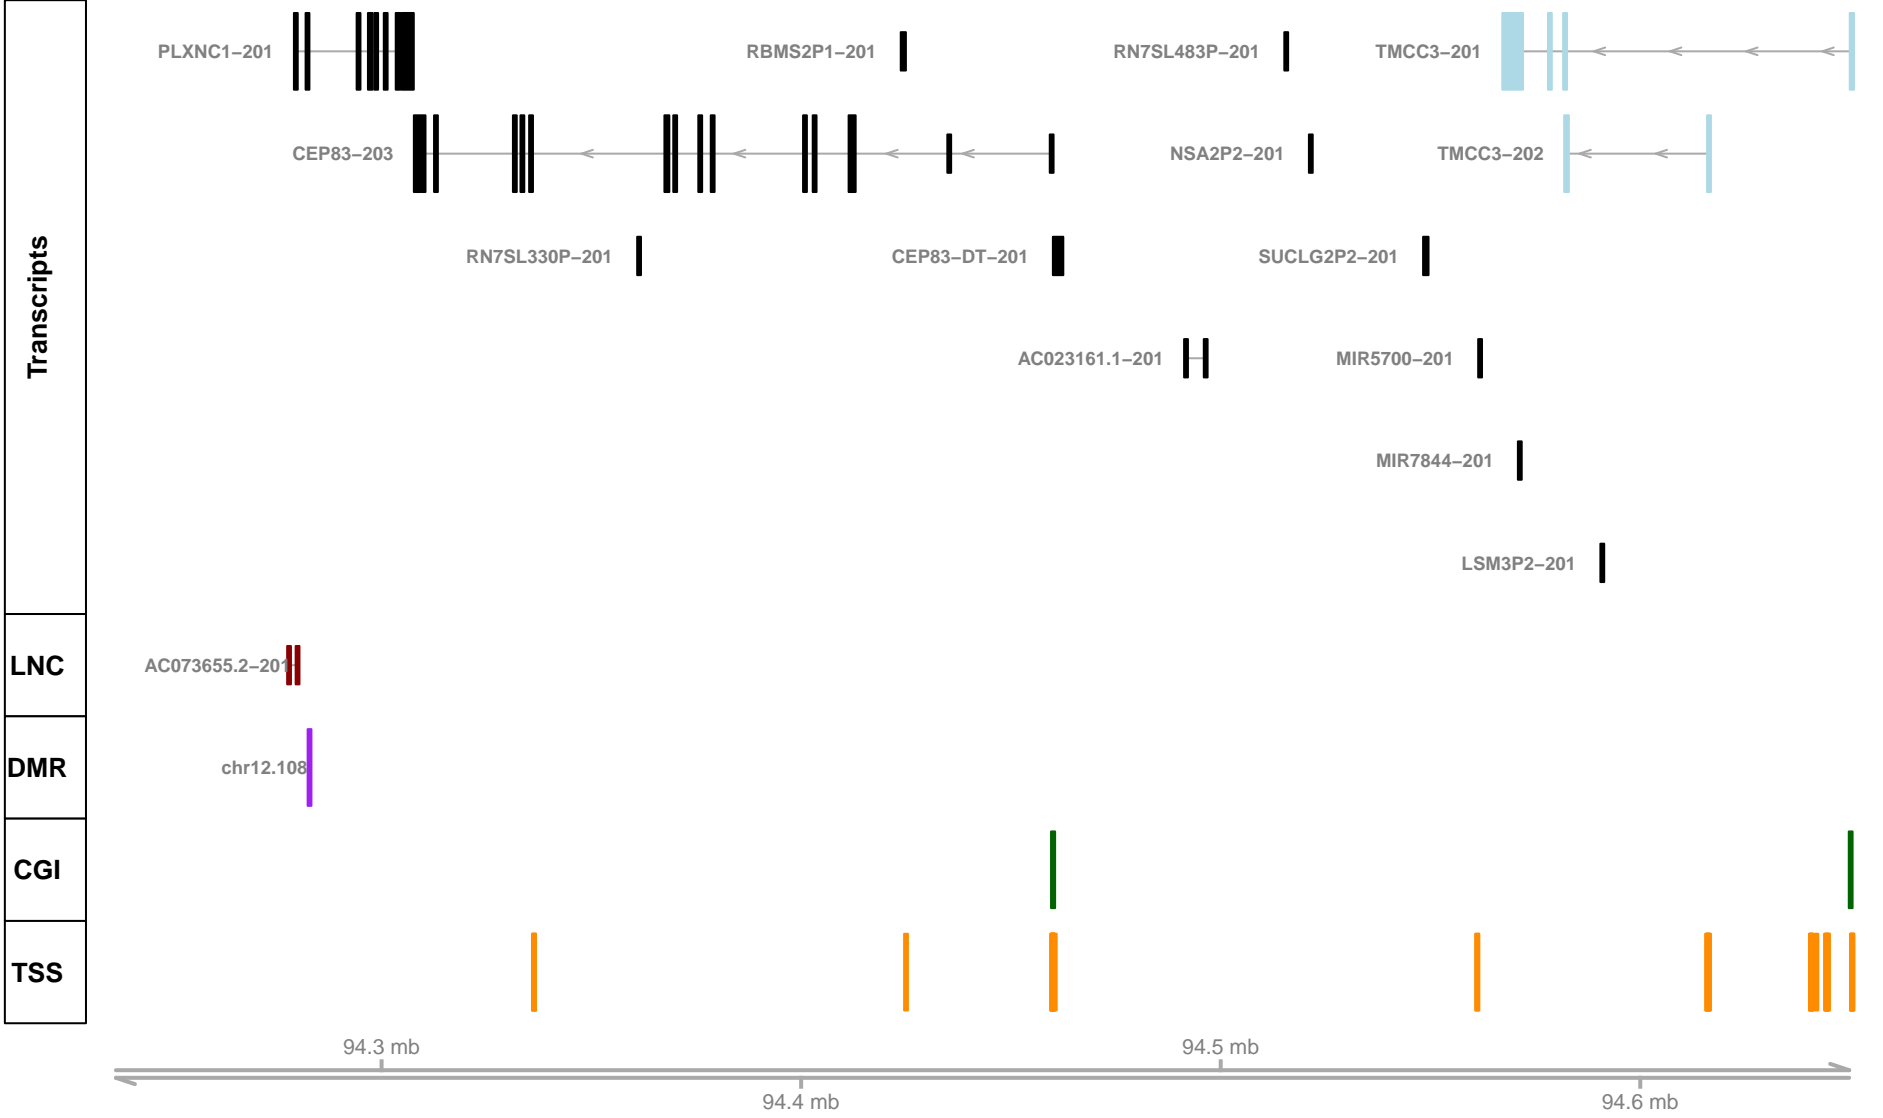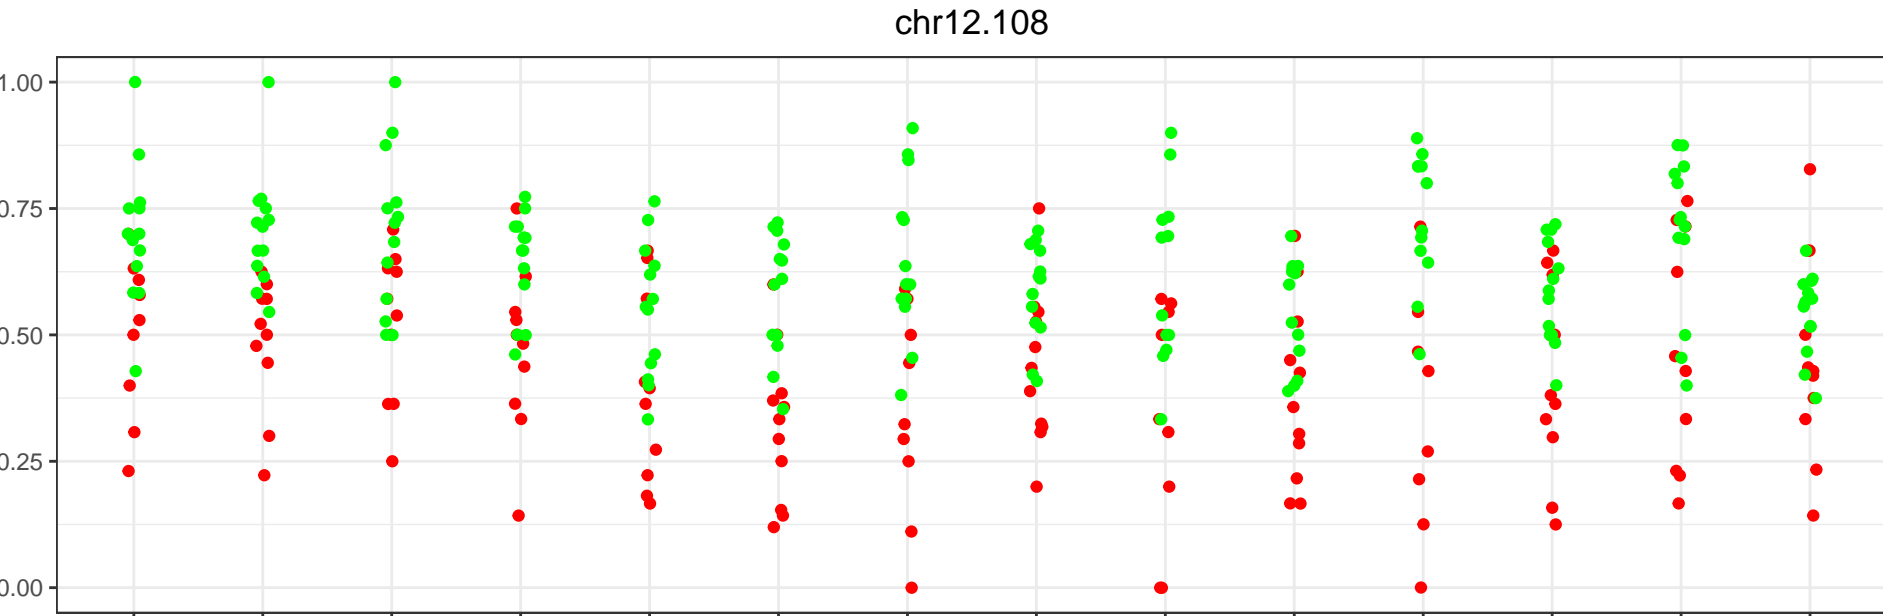

# AC087500.1

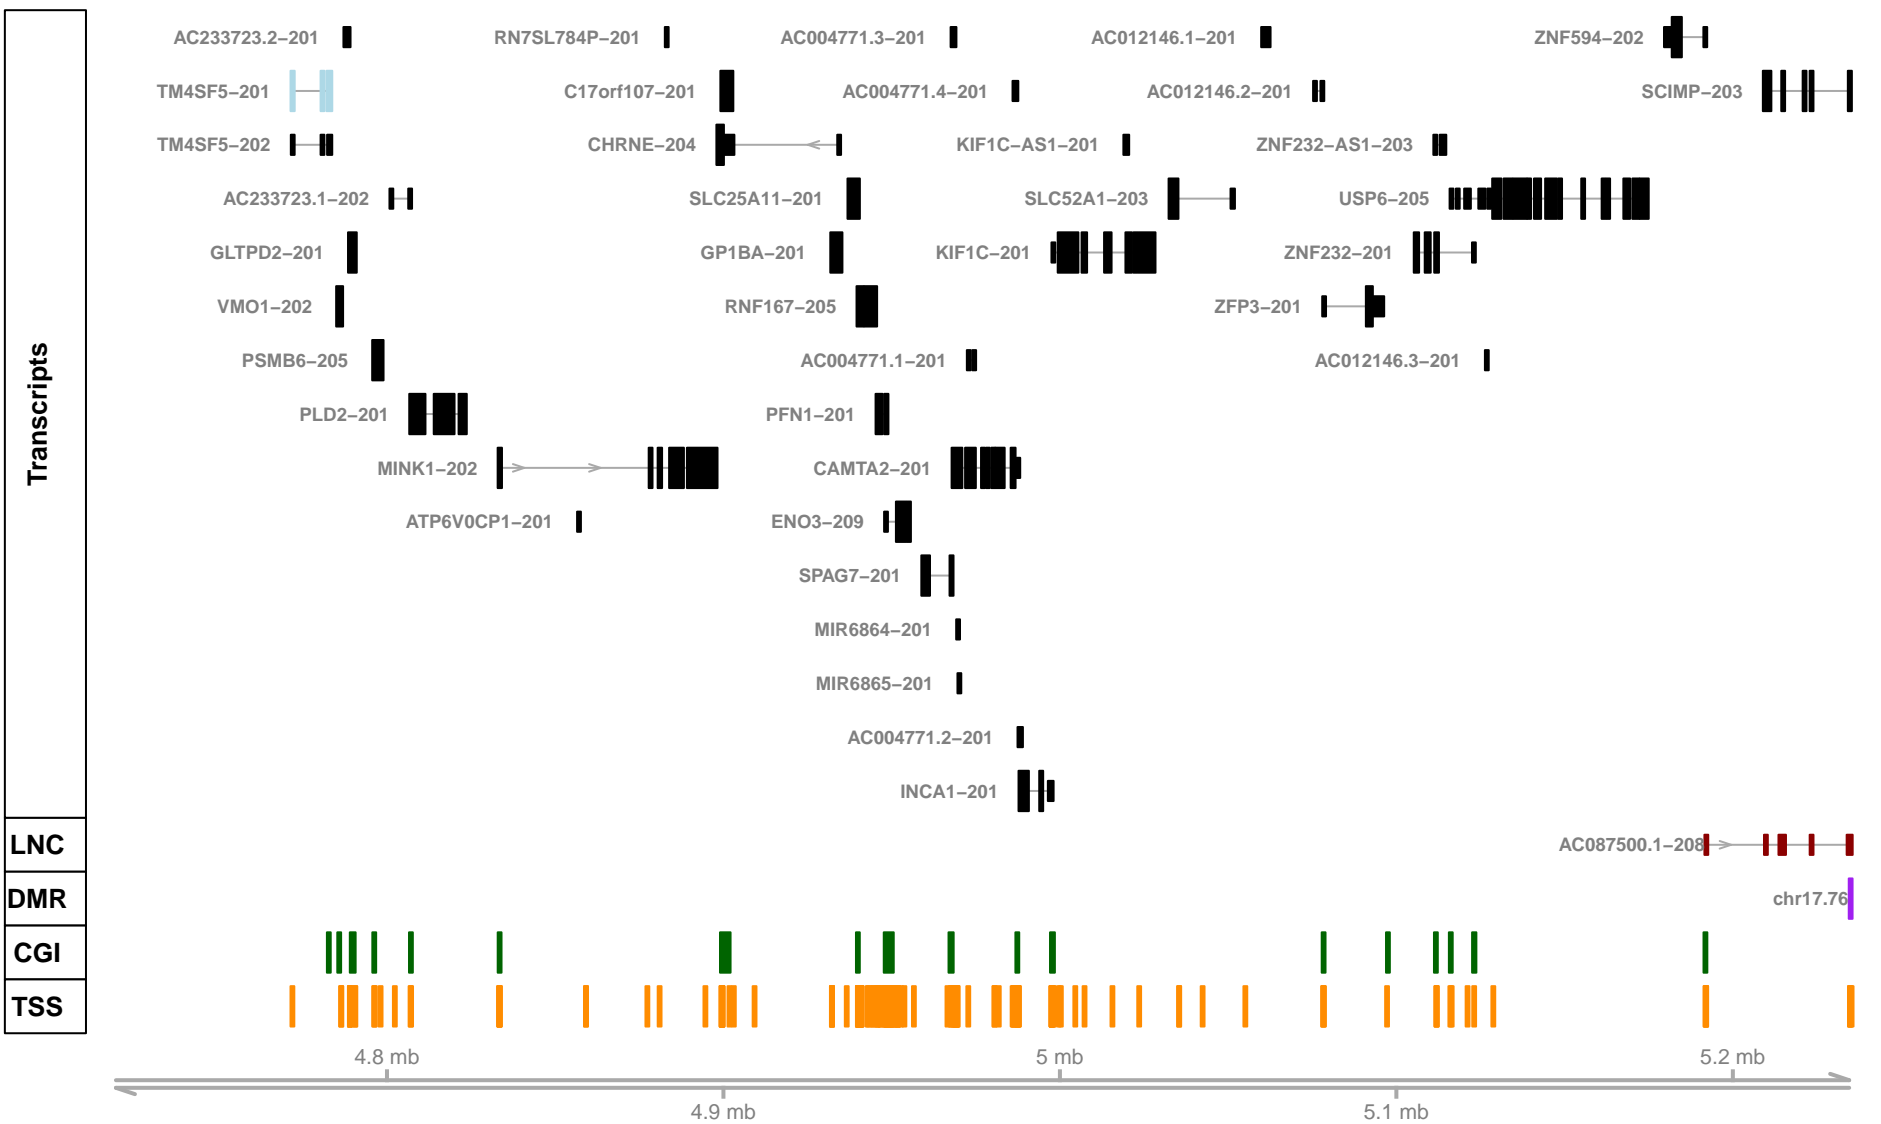

## chr17.76

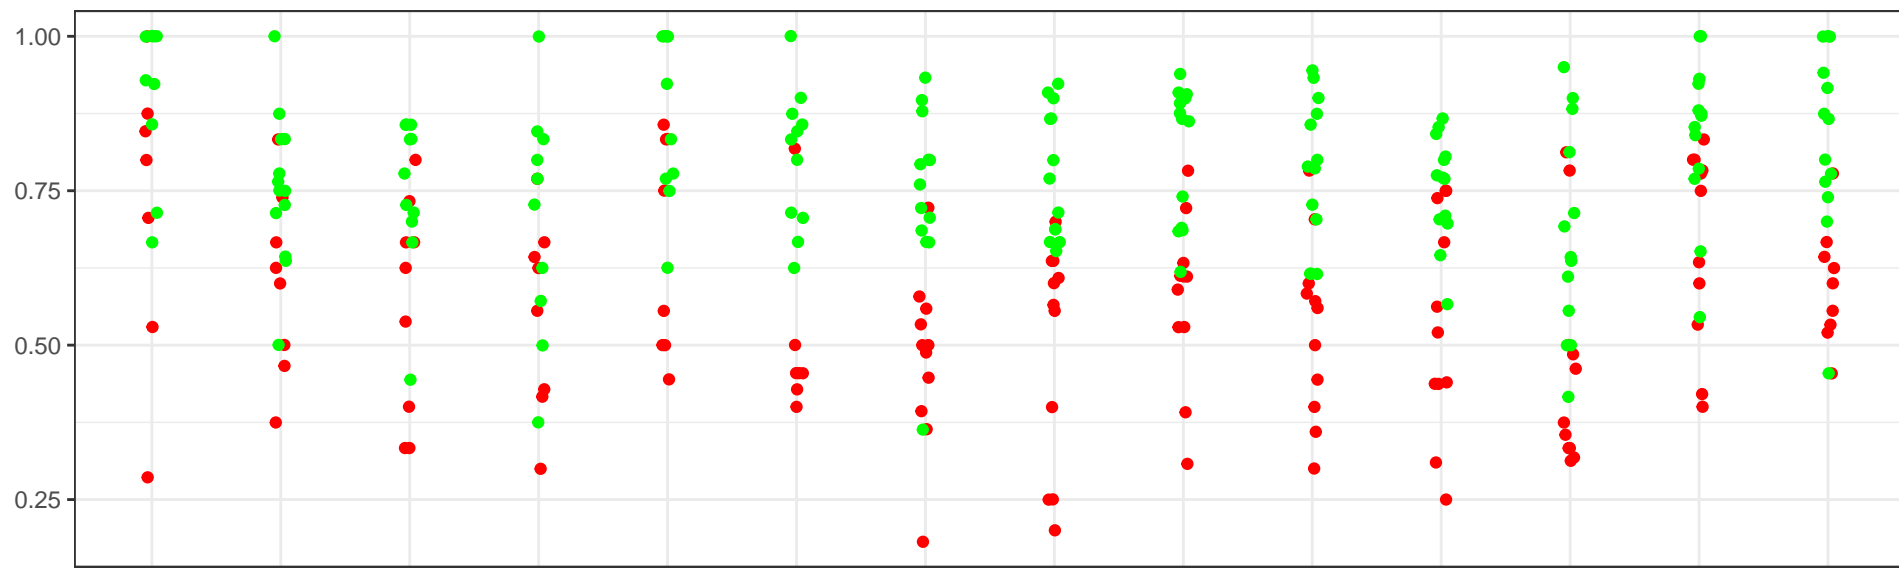

AC090739.1

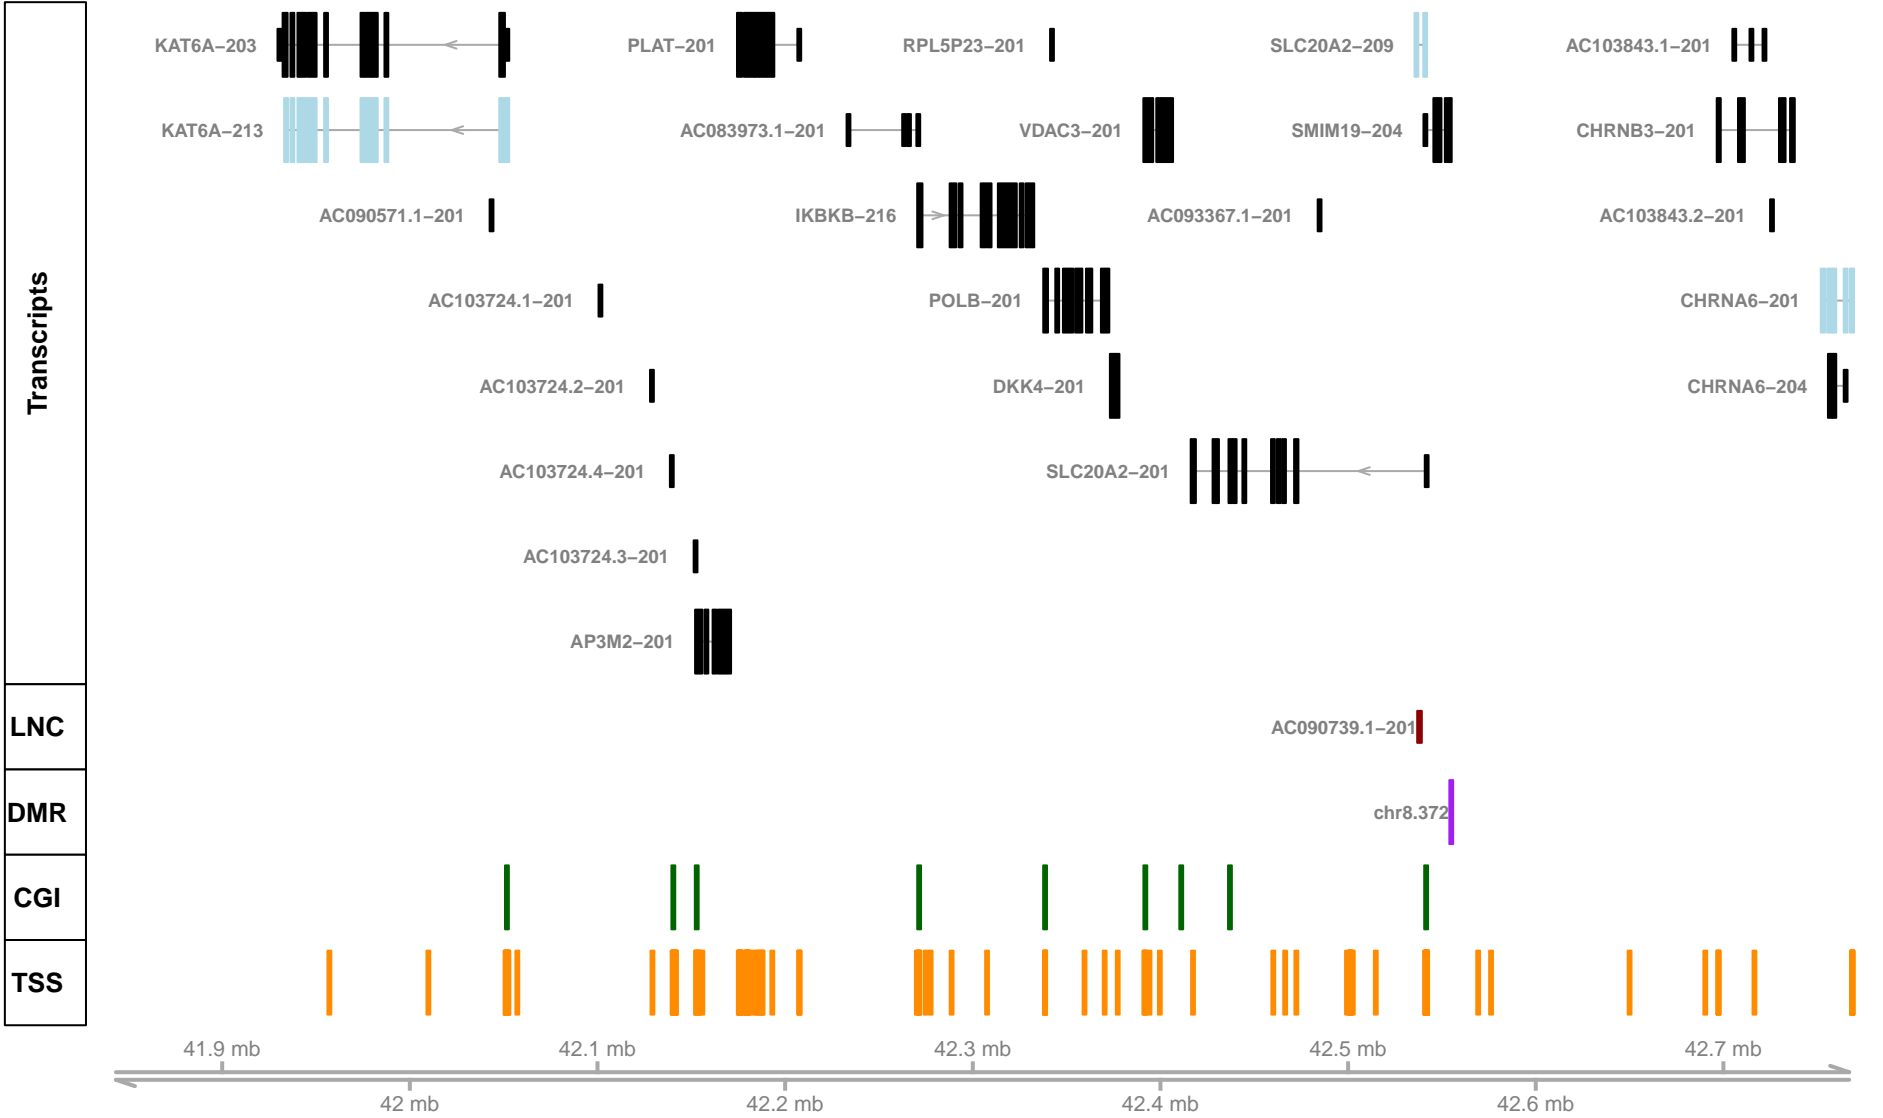

chr8.372

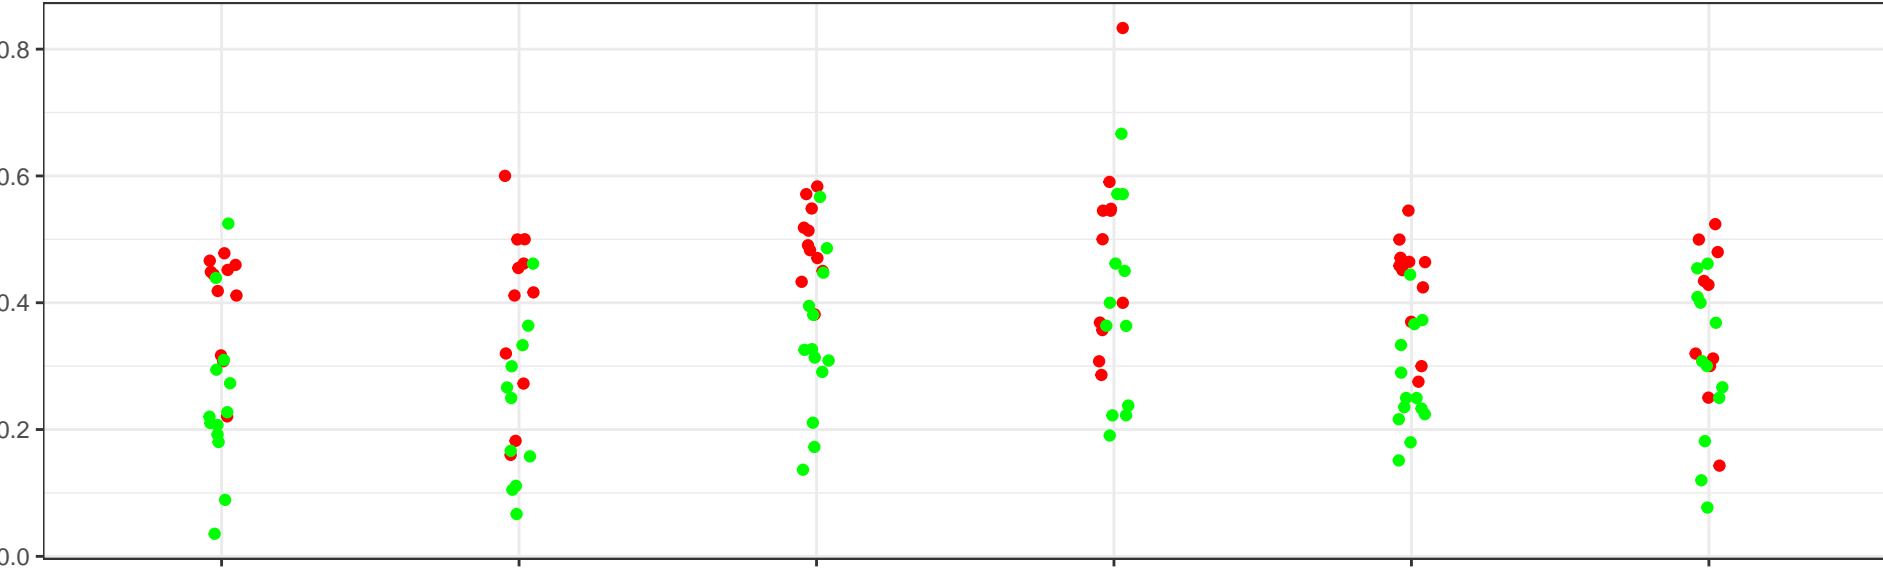

AC092068.1

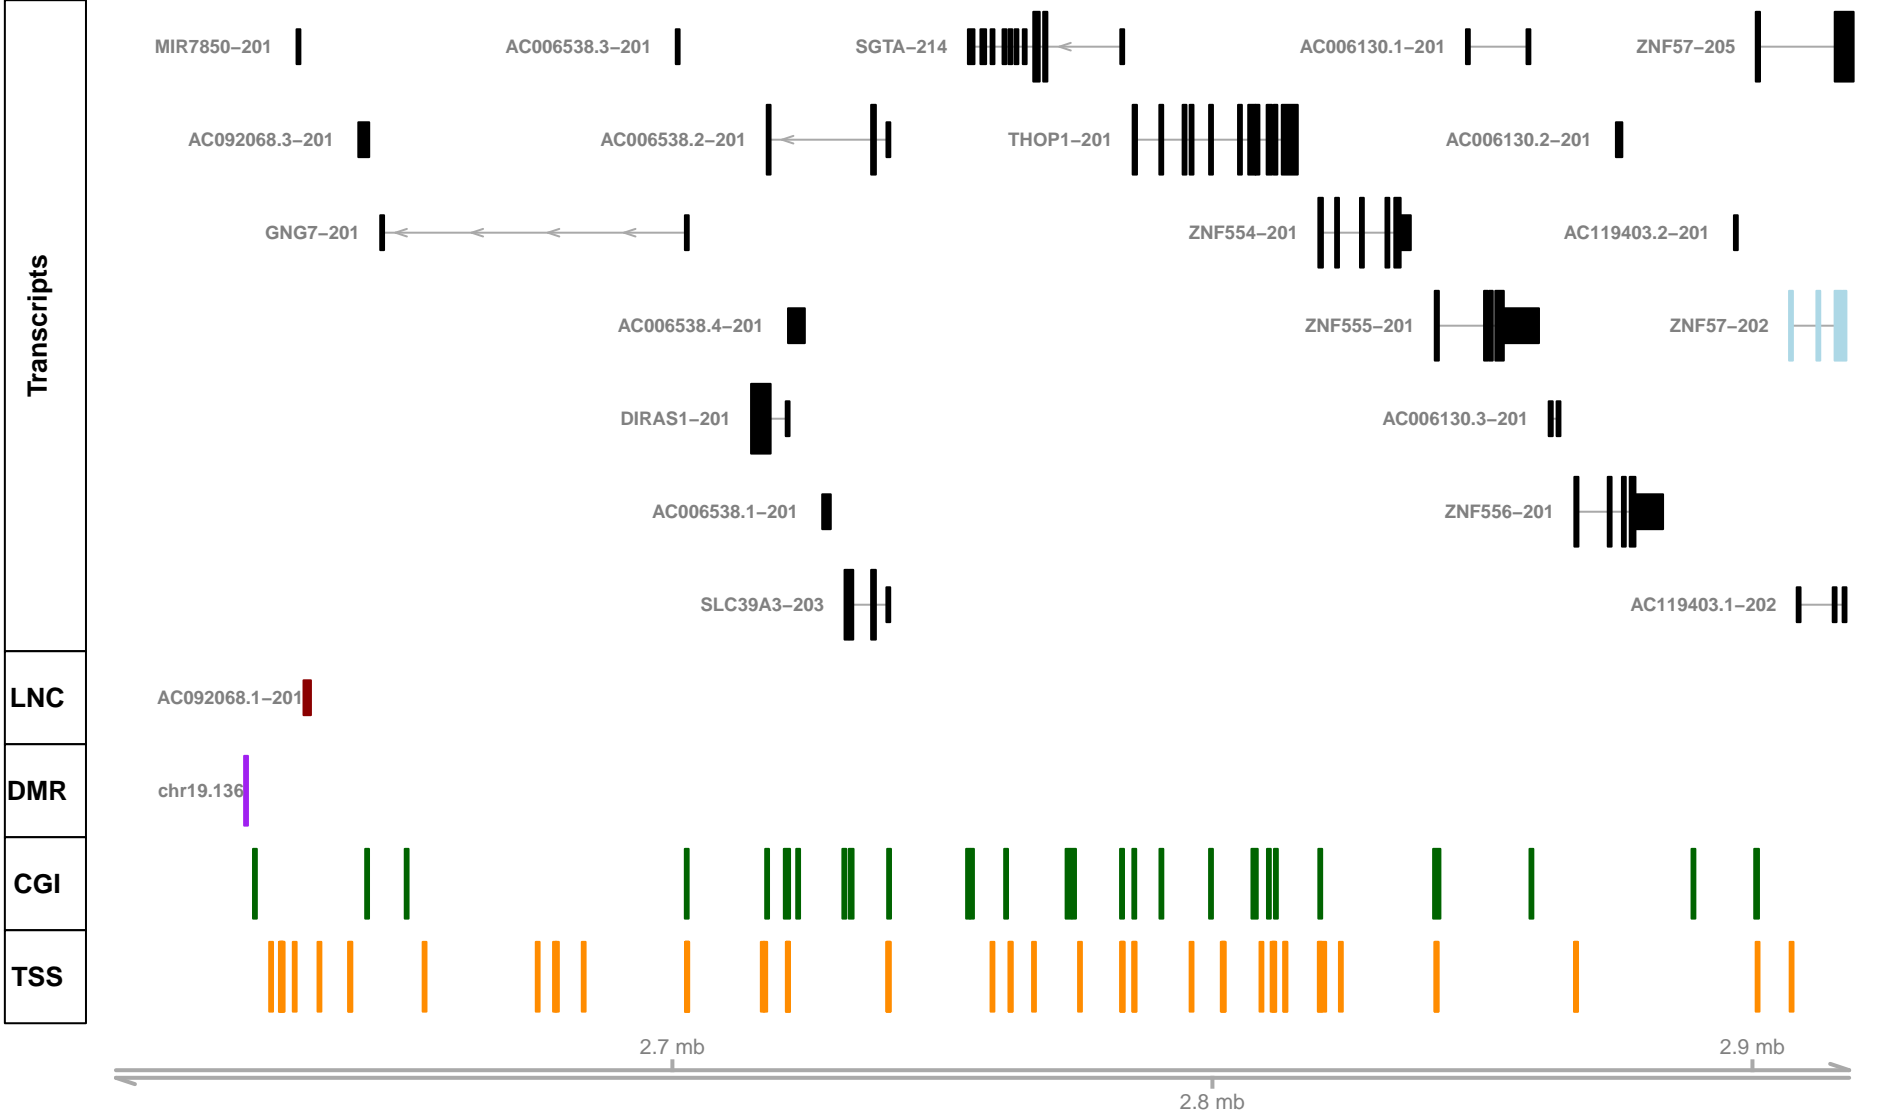

chr19.136

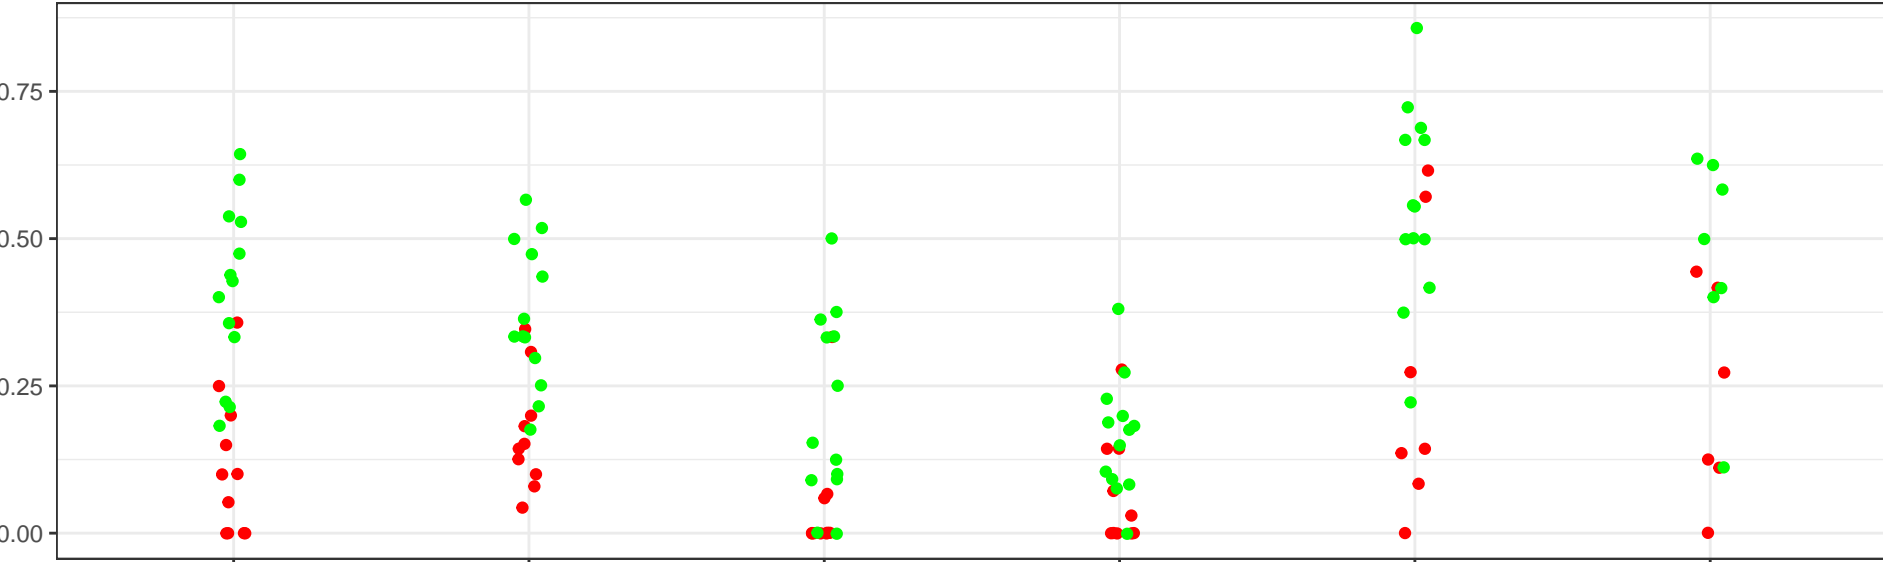

AC092142.1

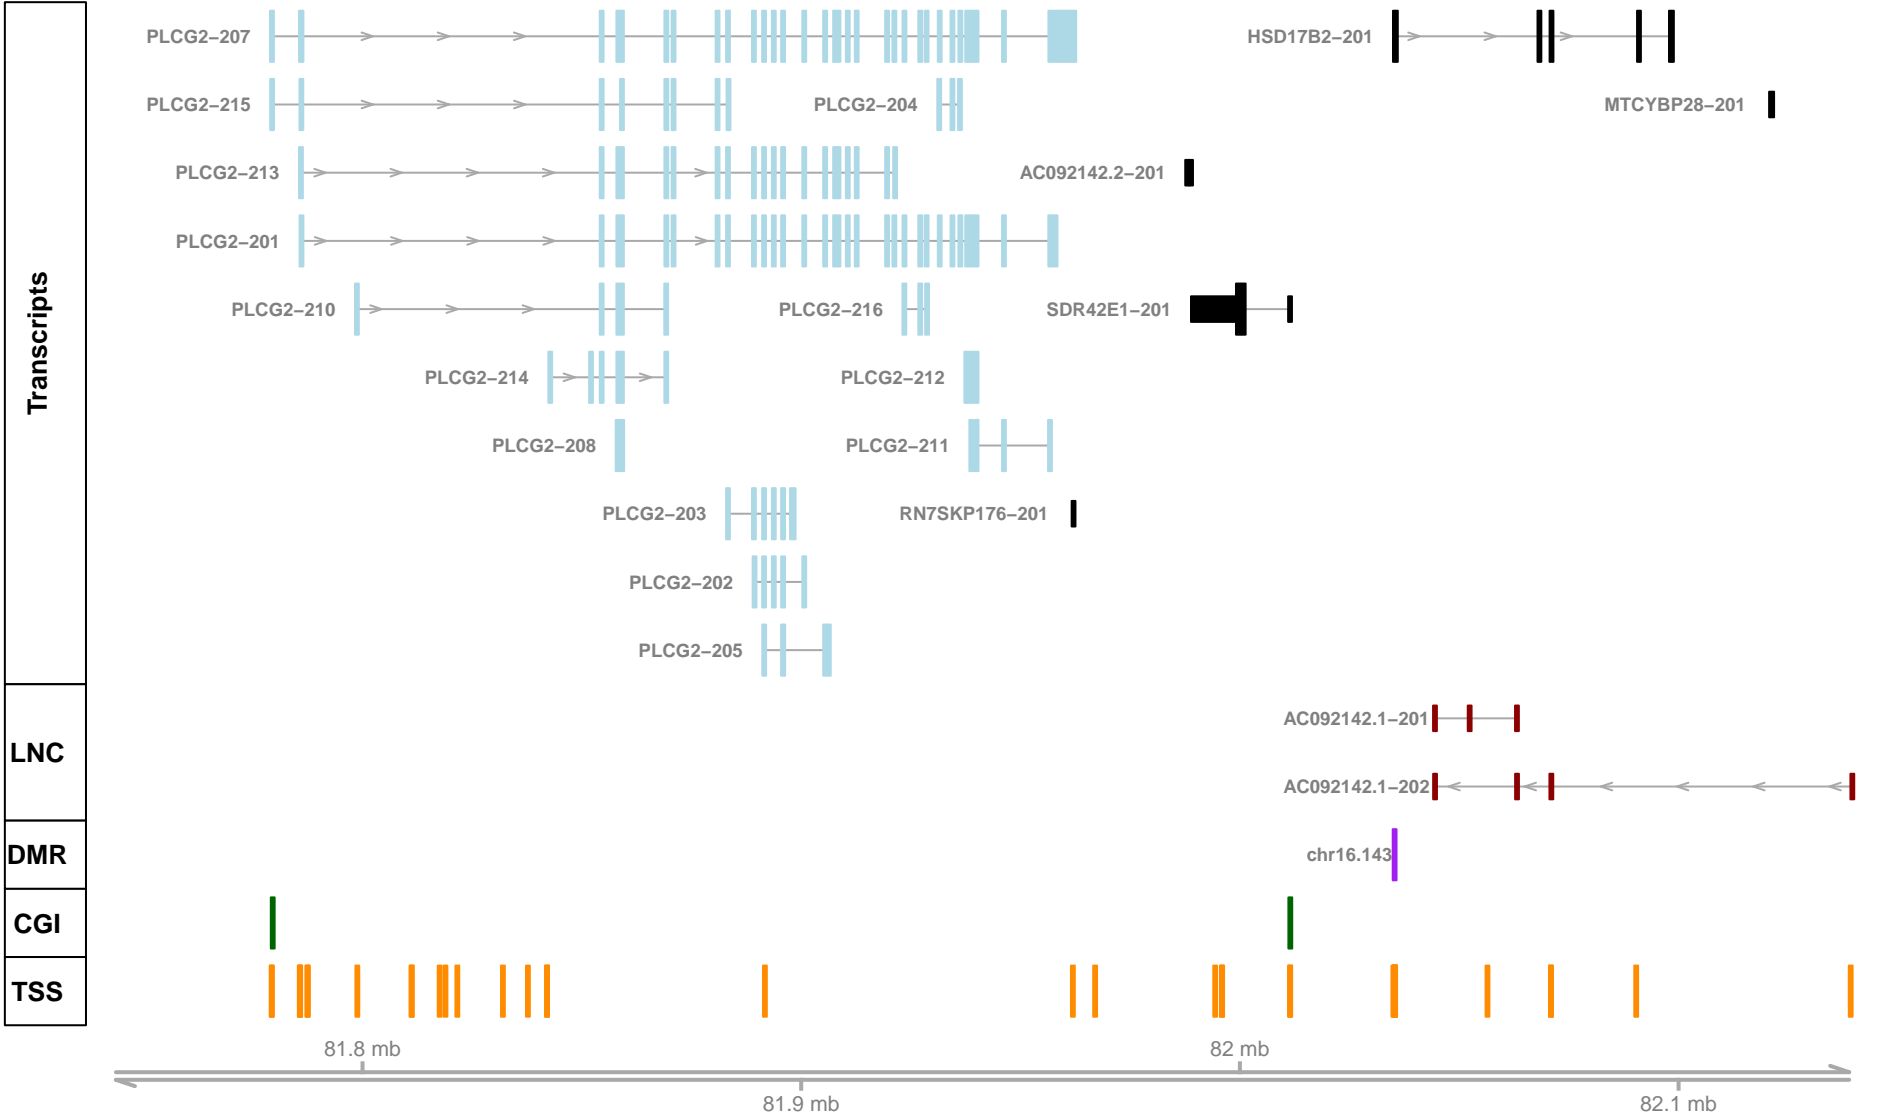

chr16.143

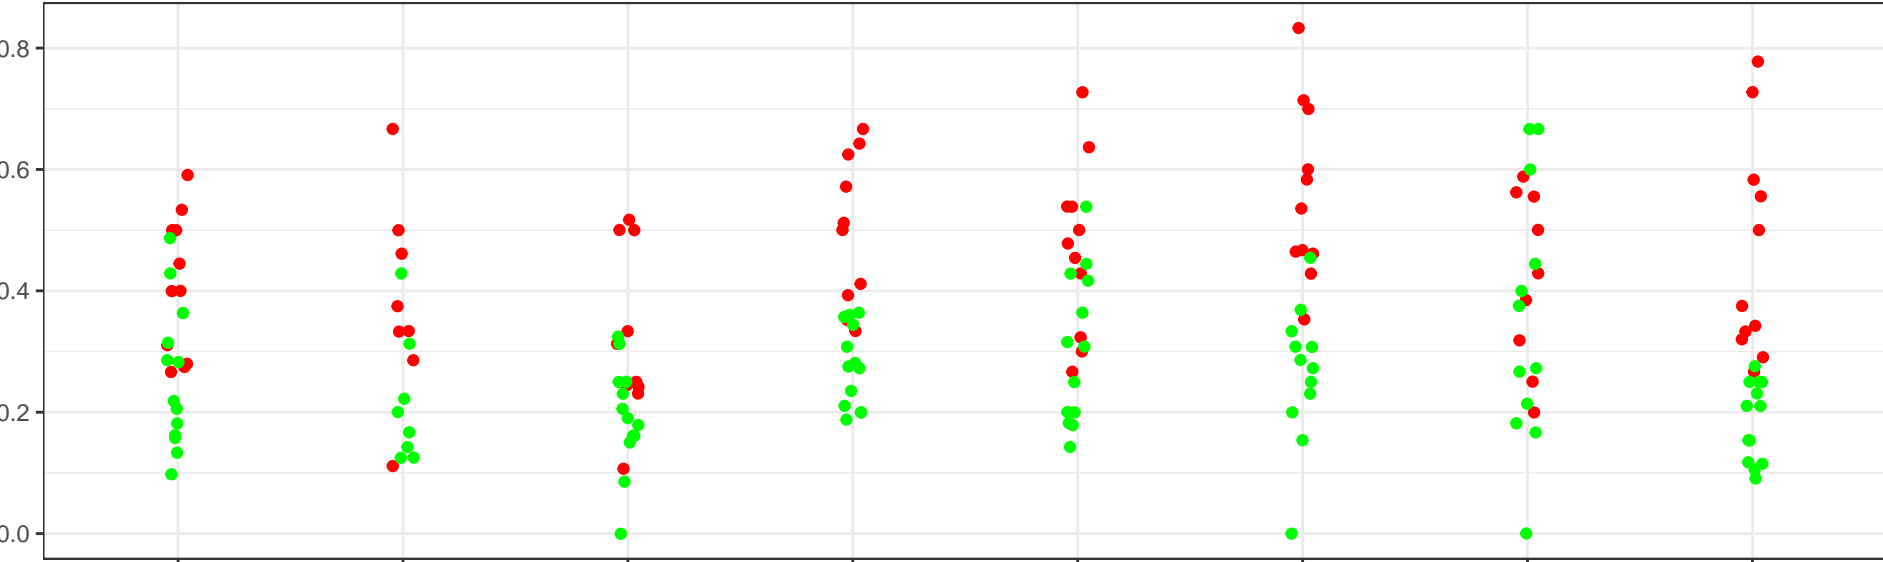

## AC092145.1

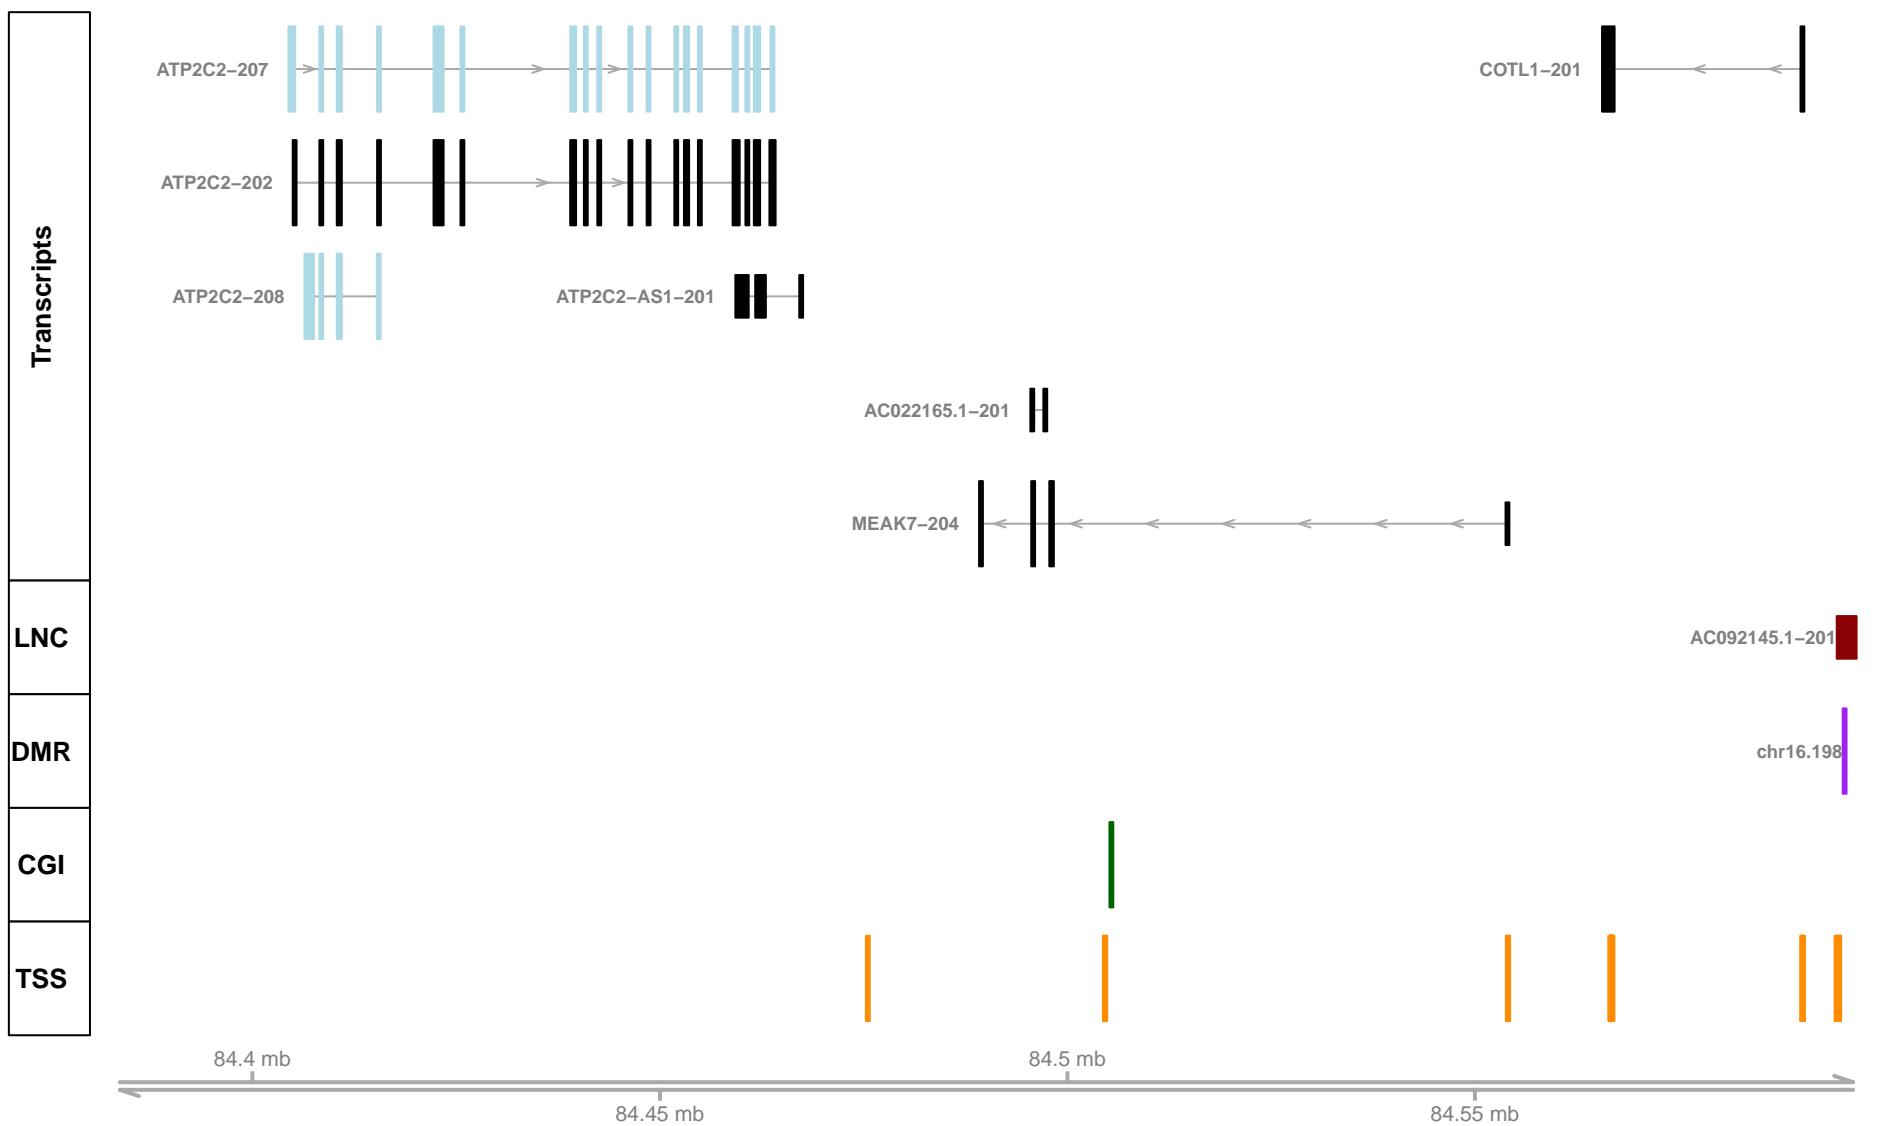

## chr16.198

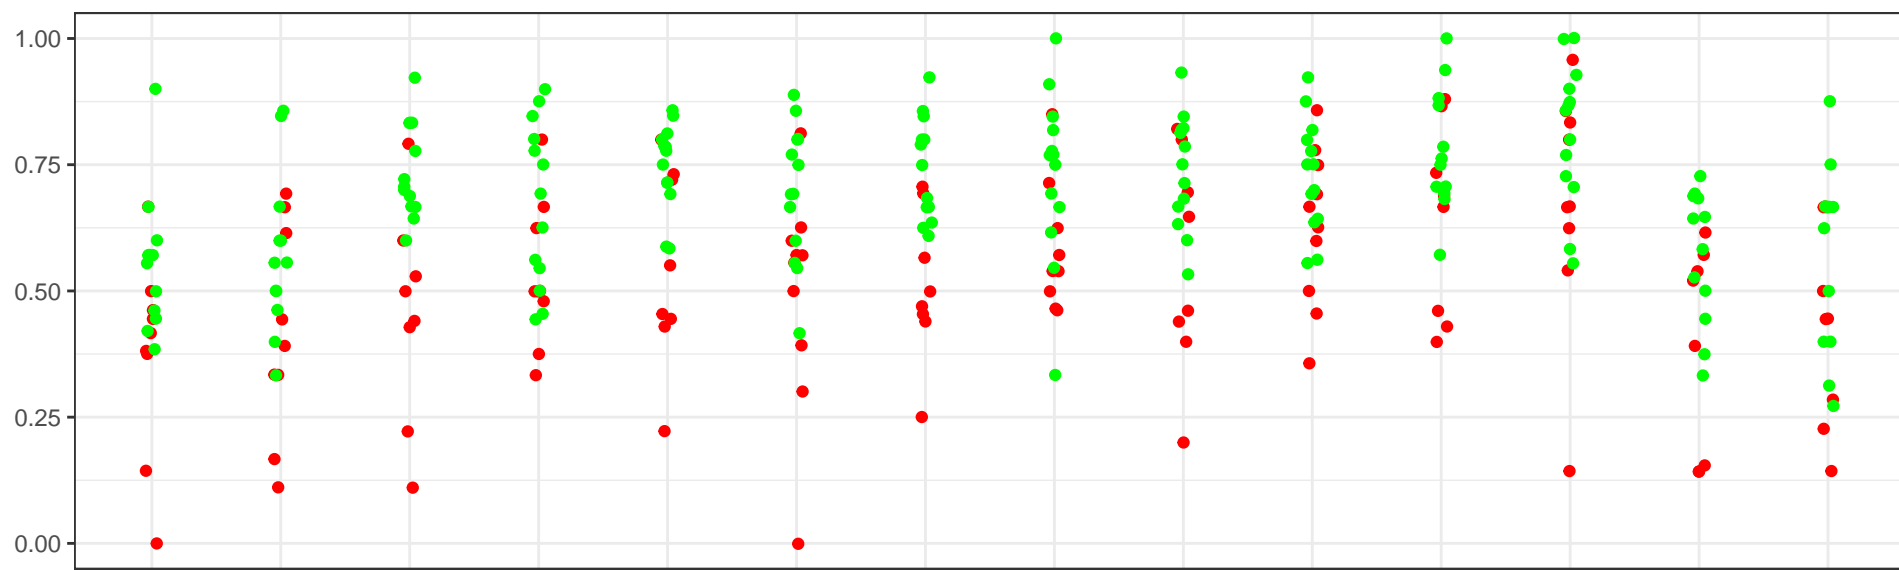

AC092720.3

Transcripts

LNC

DMR

CGI

TSS

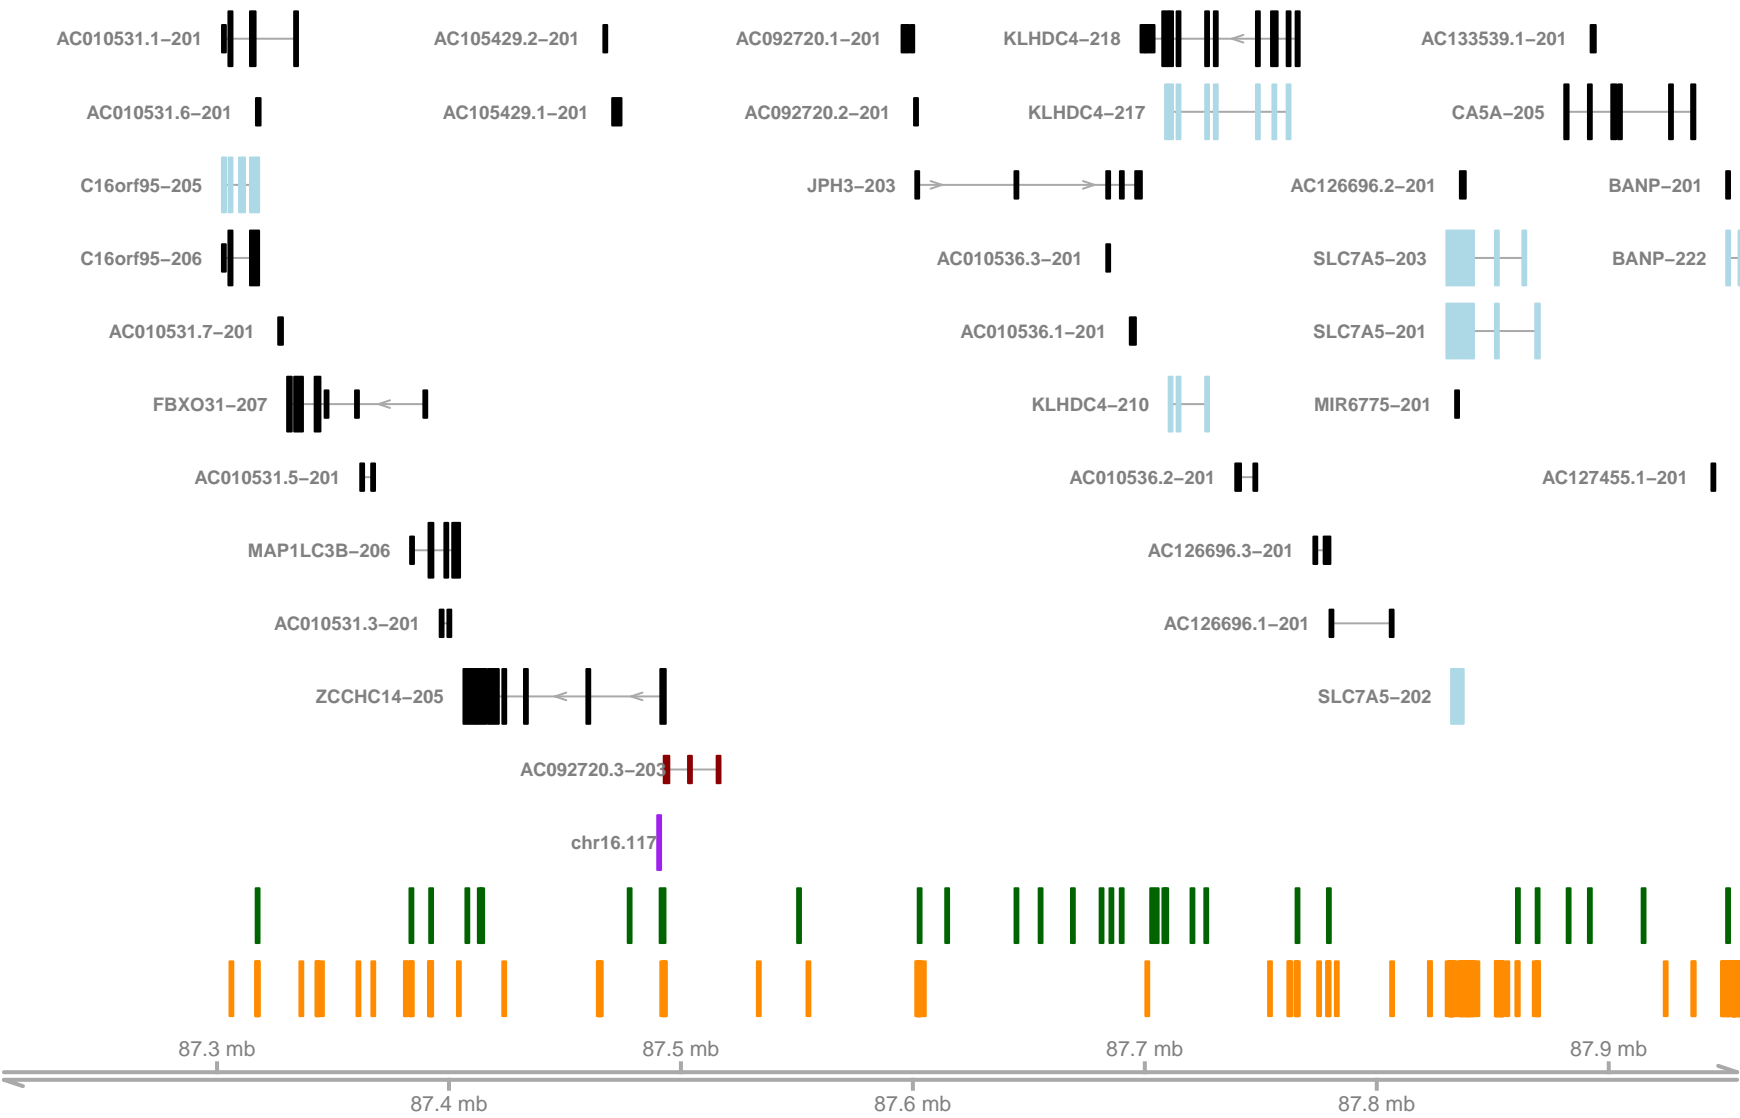

chr16.117

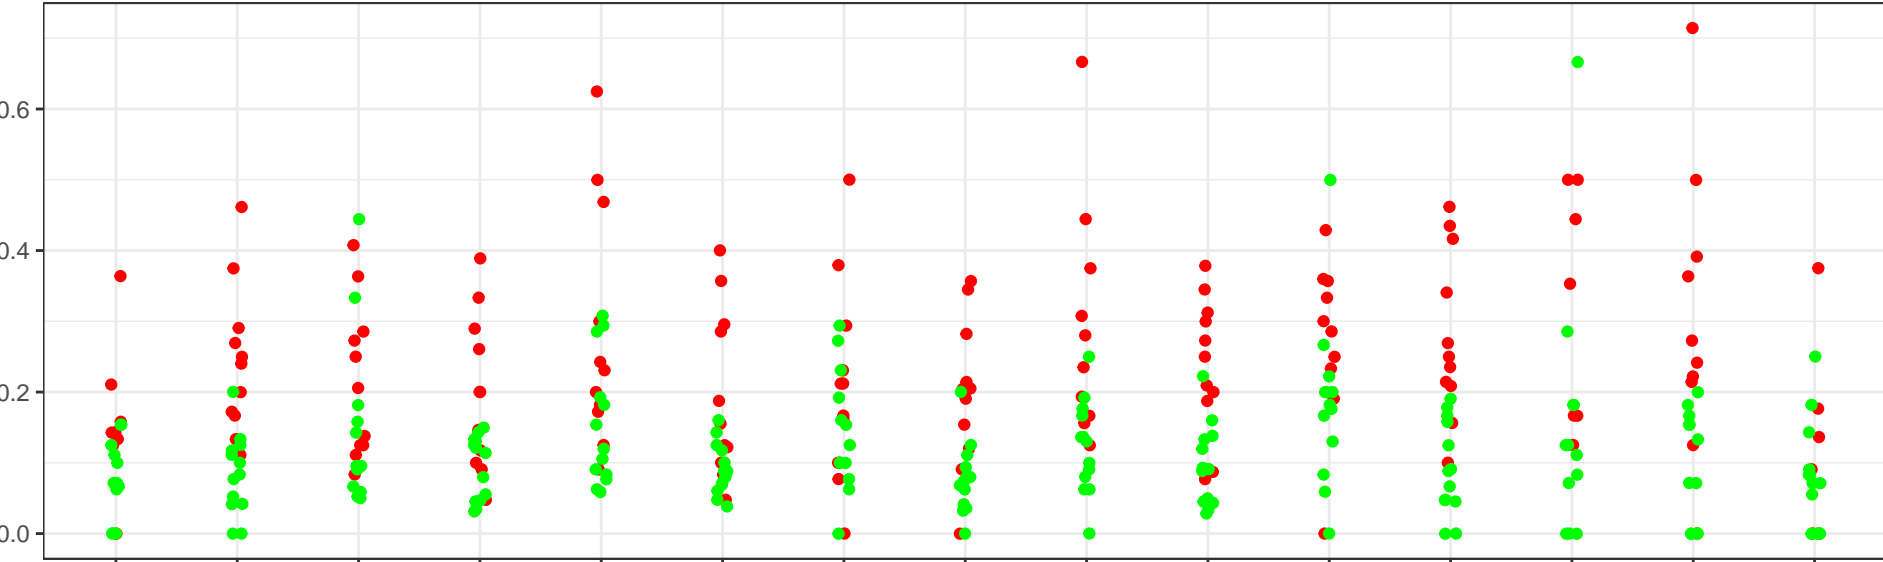

AC093423.2

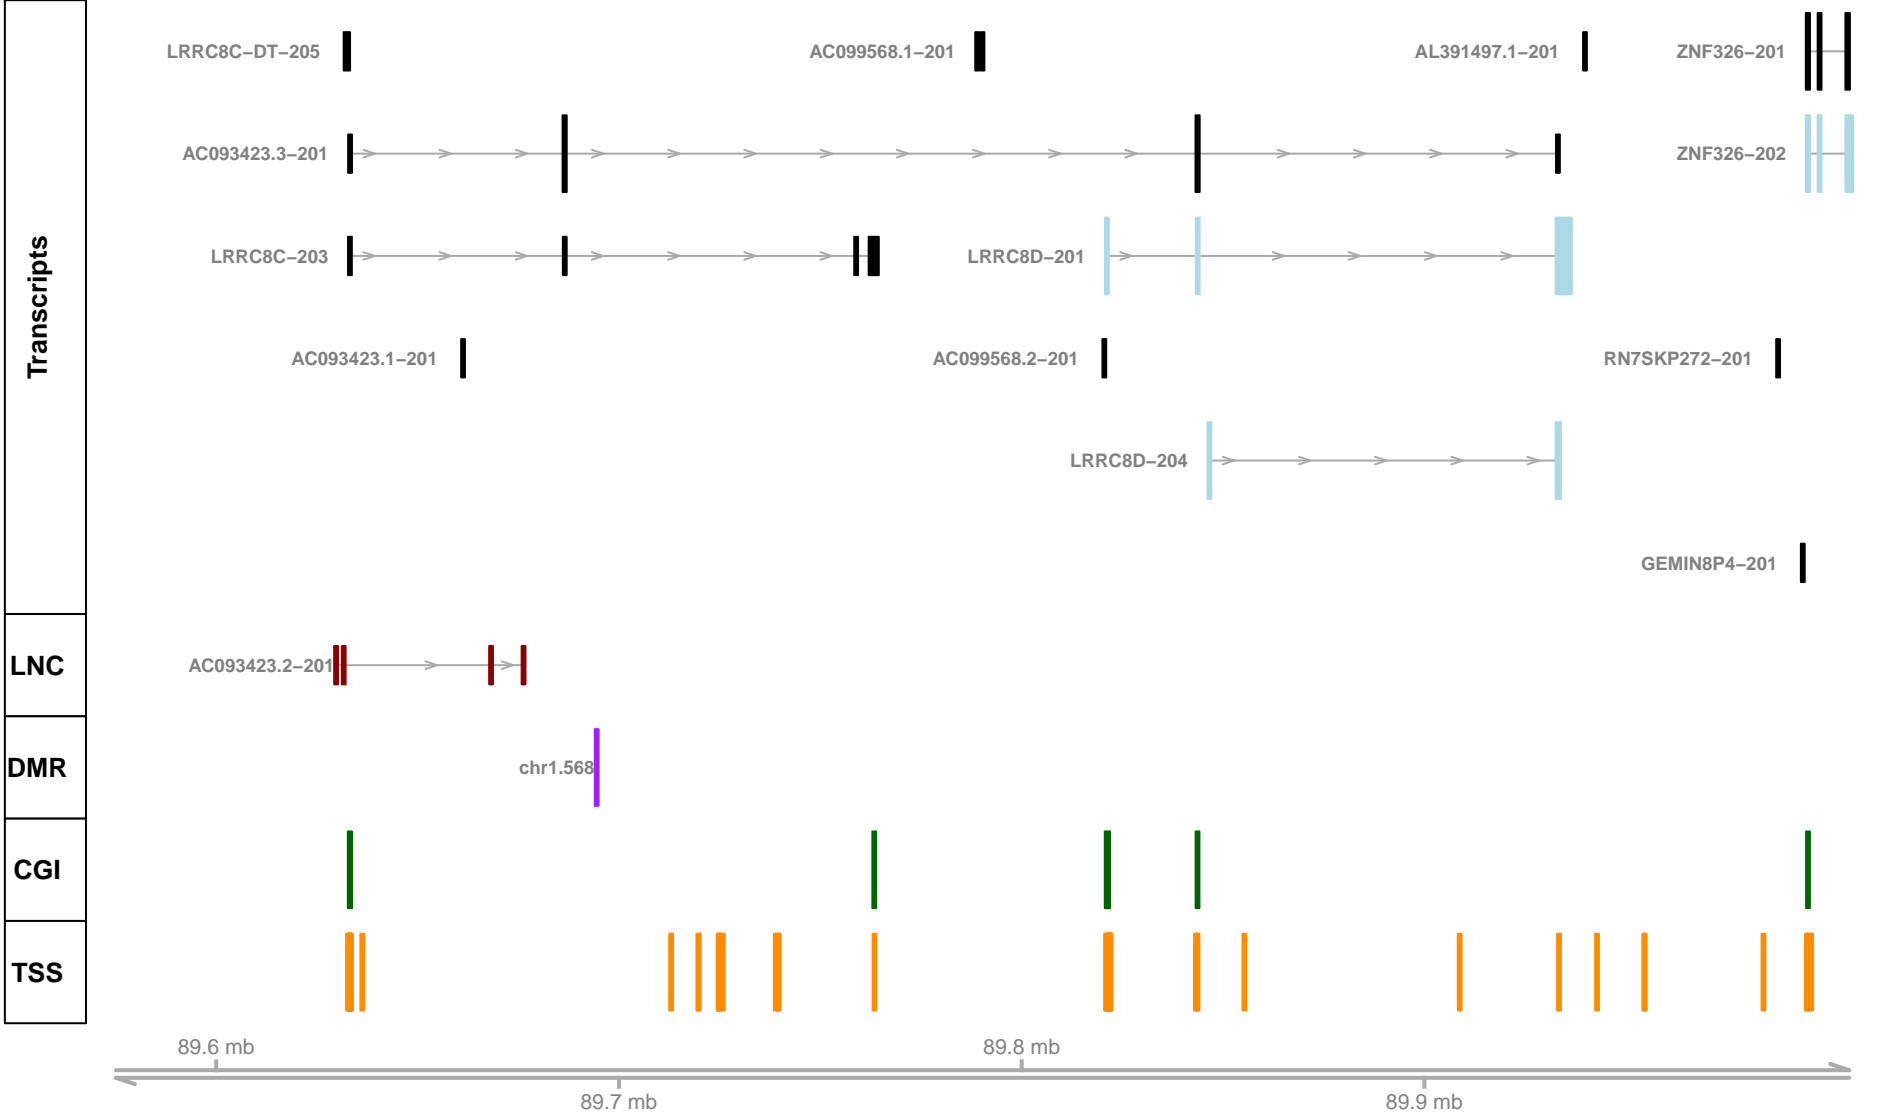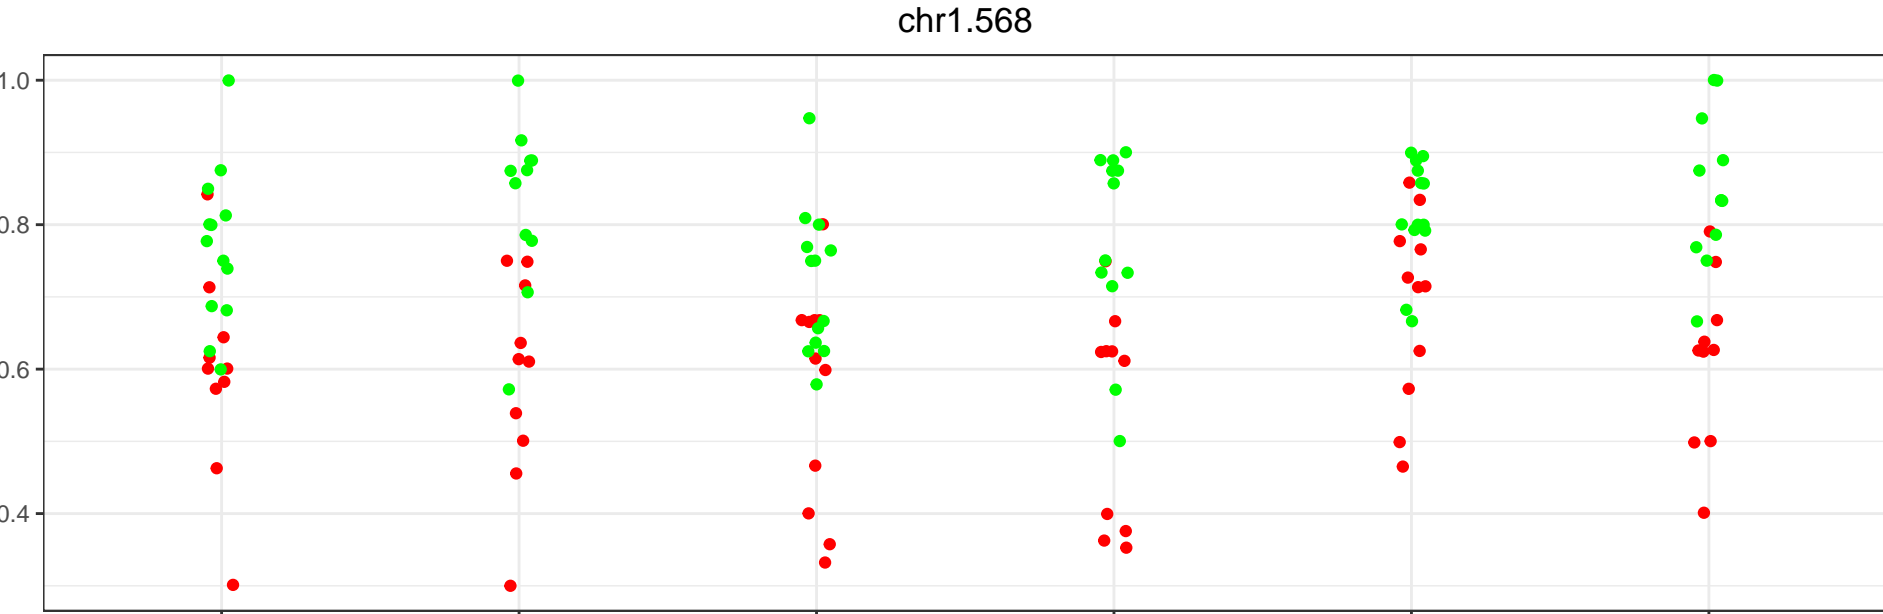

AC093535.1

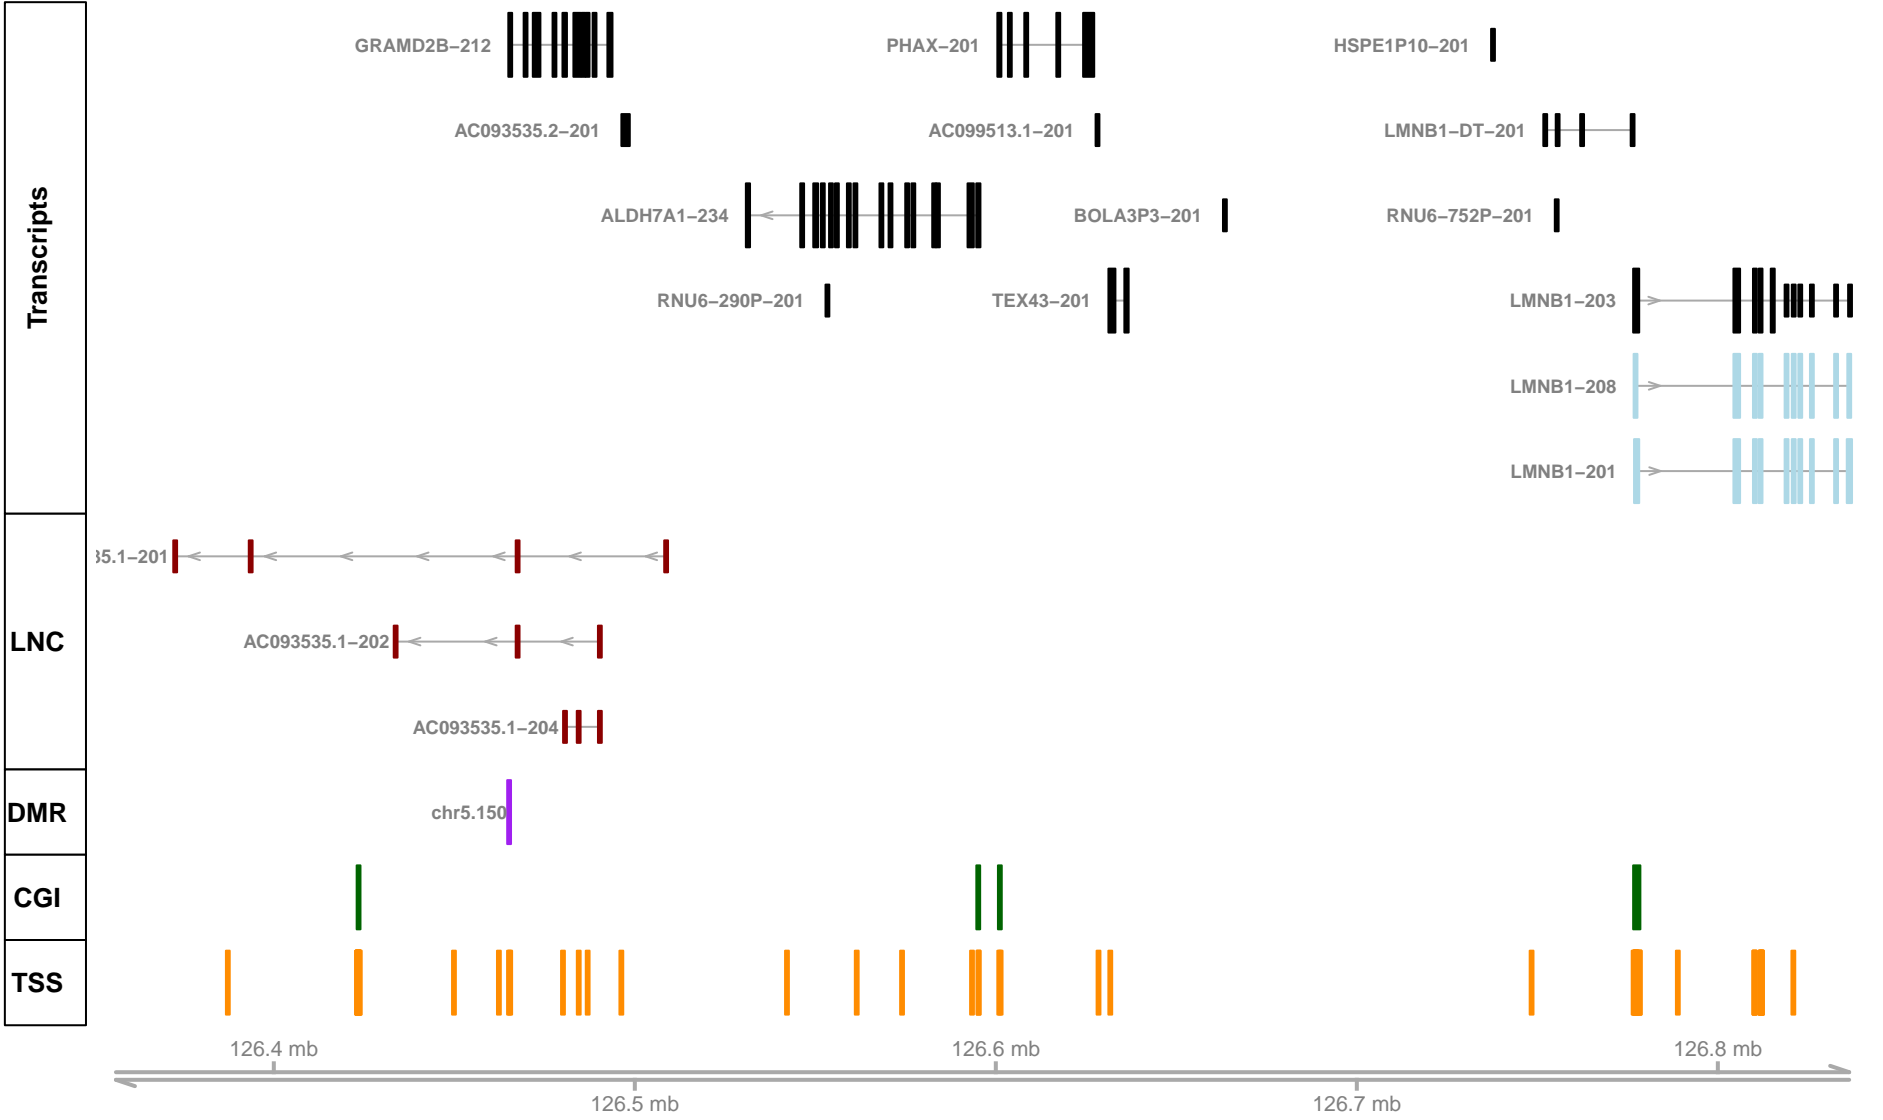

chr5.150

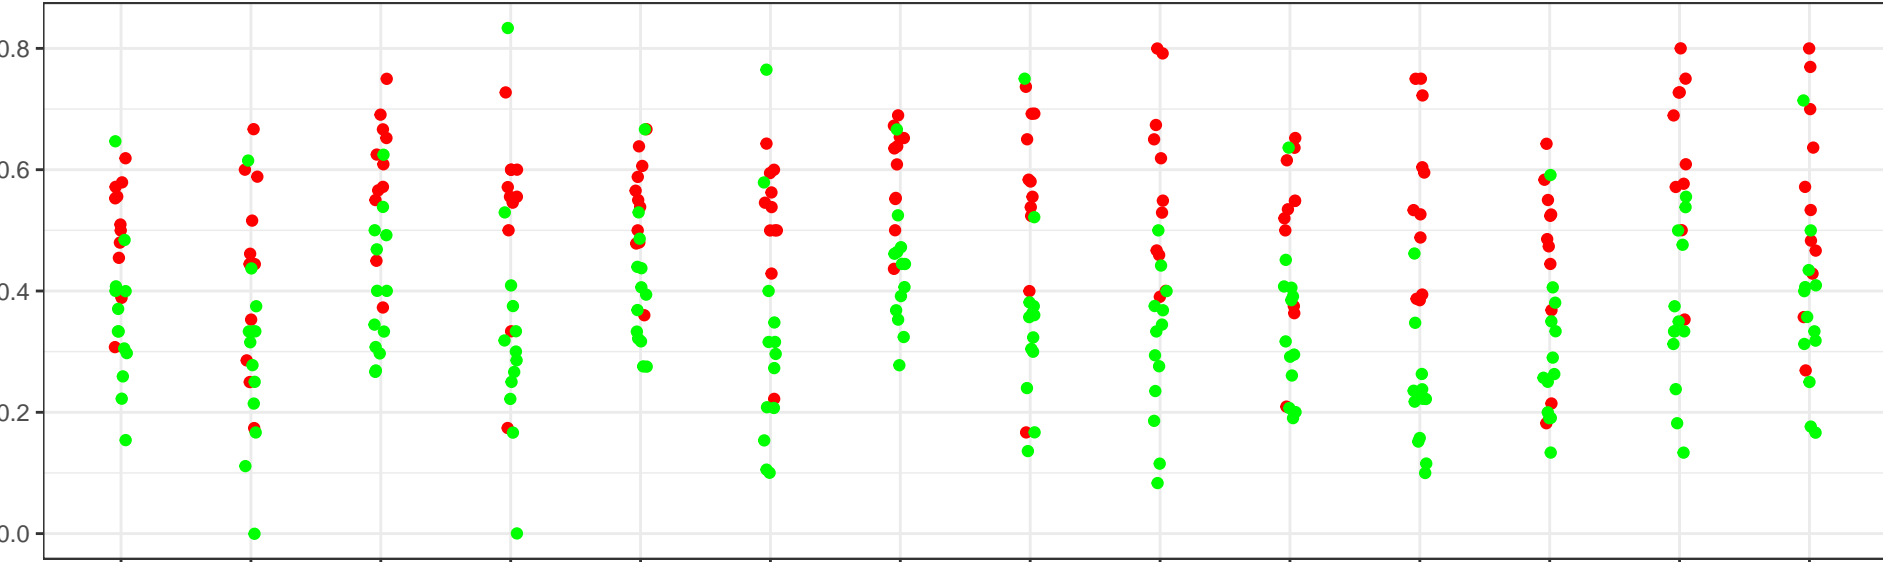

AC093866.1

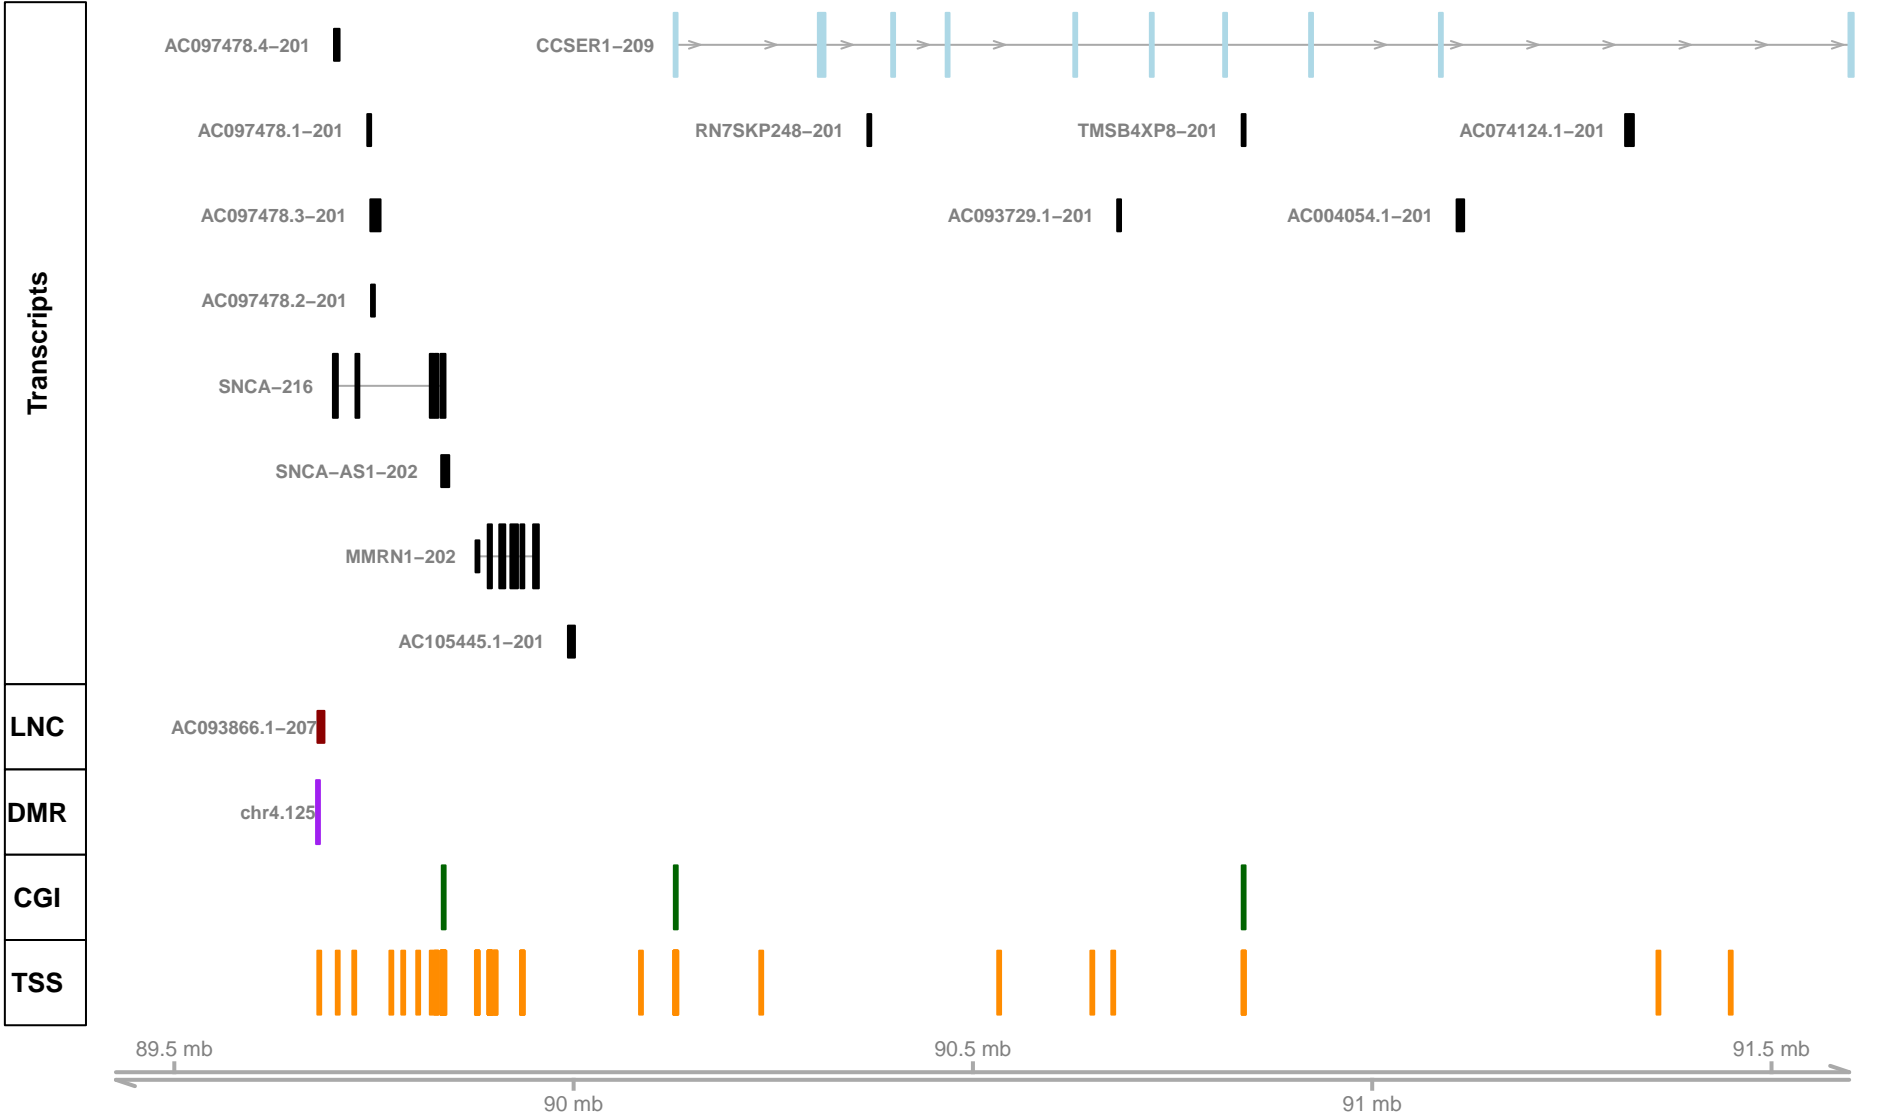

chr4.125

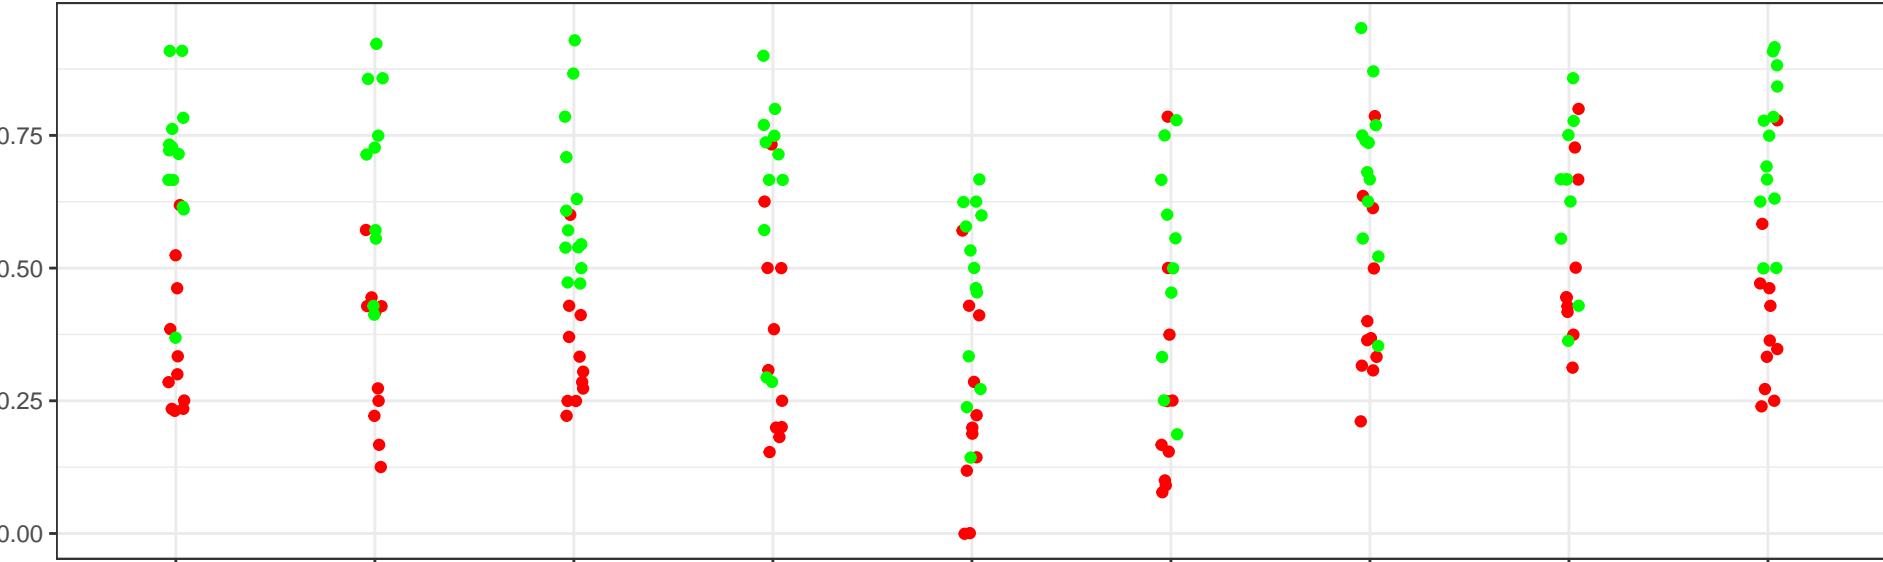

# AC097709.1

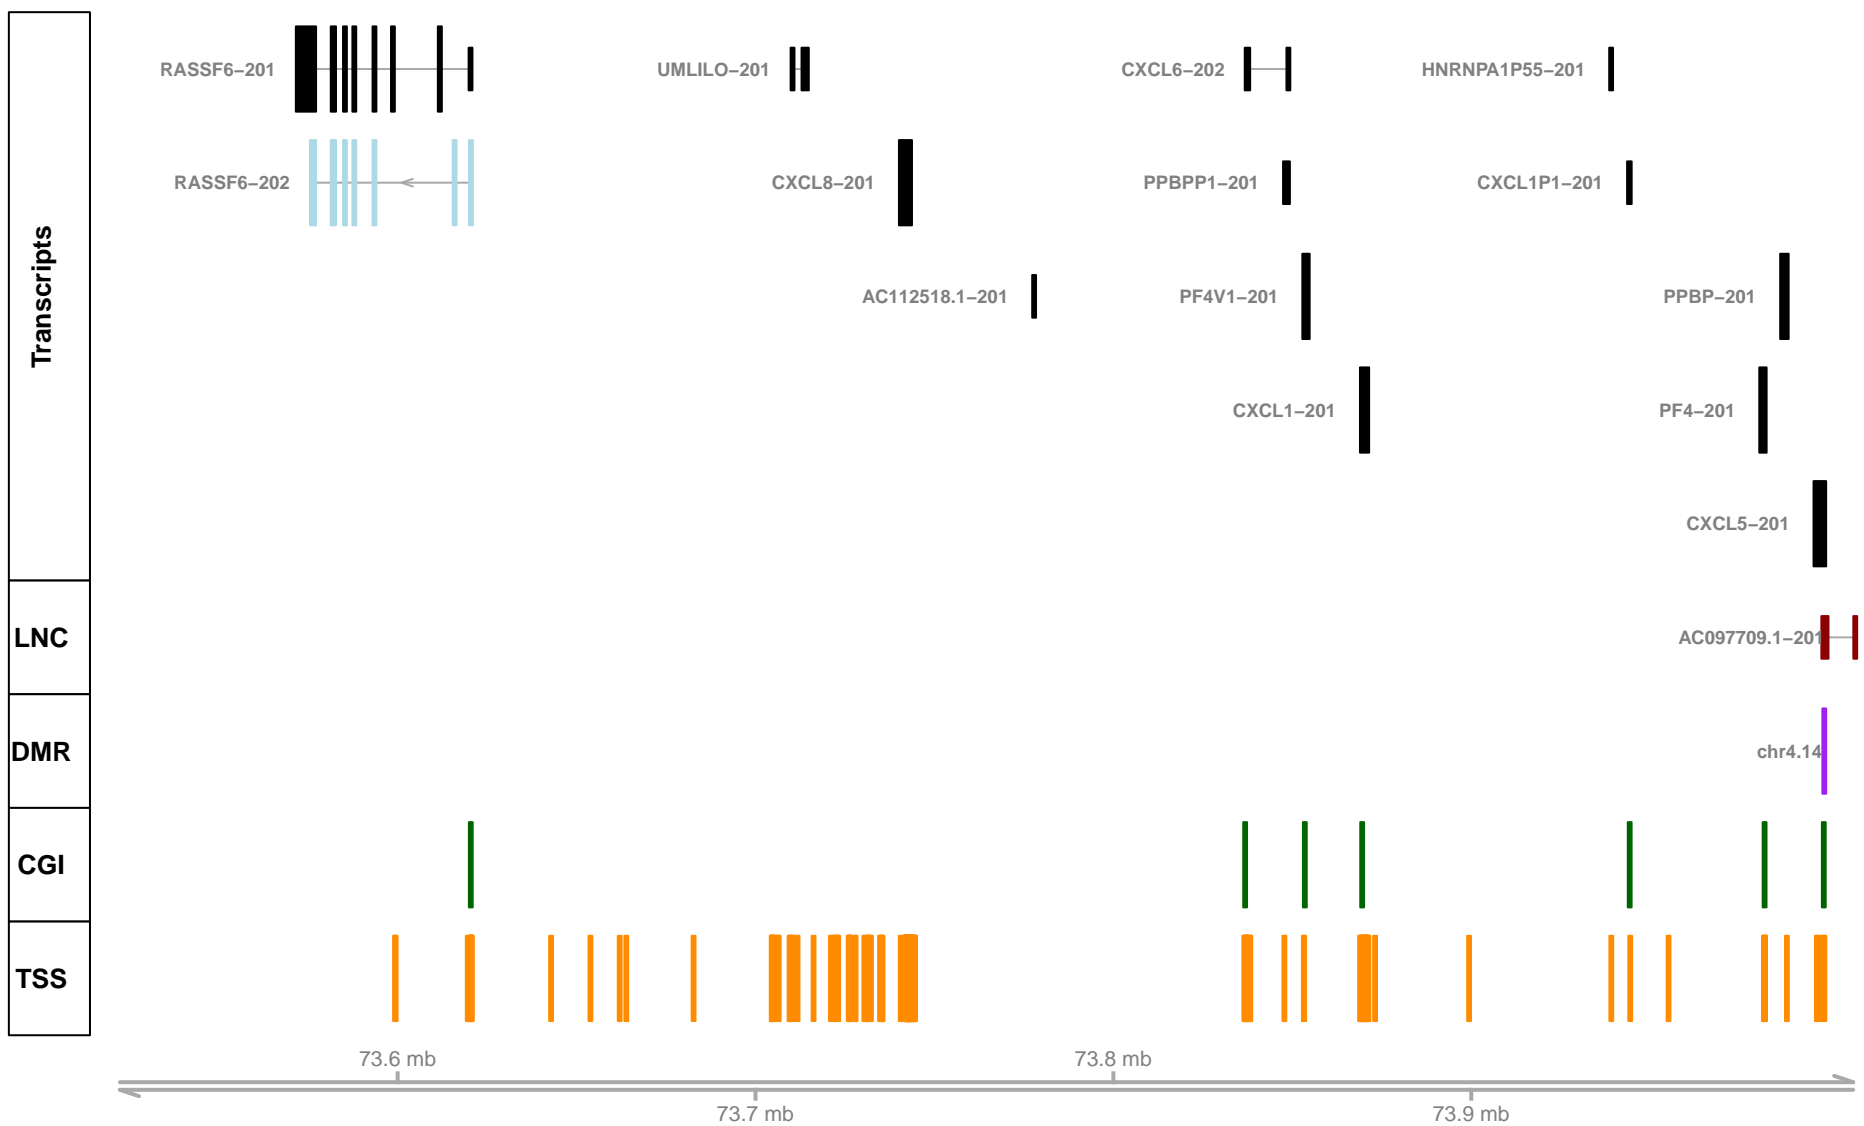

## chr4.14

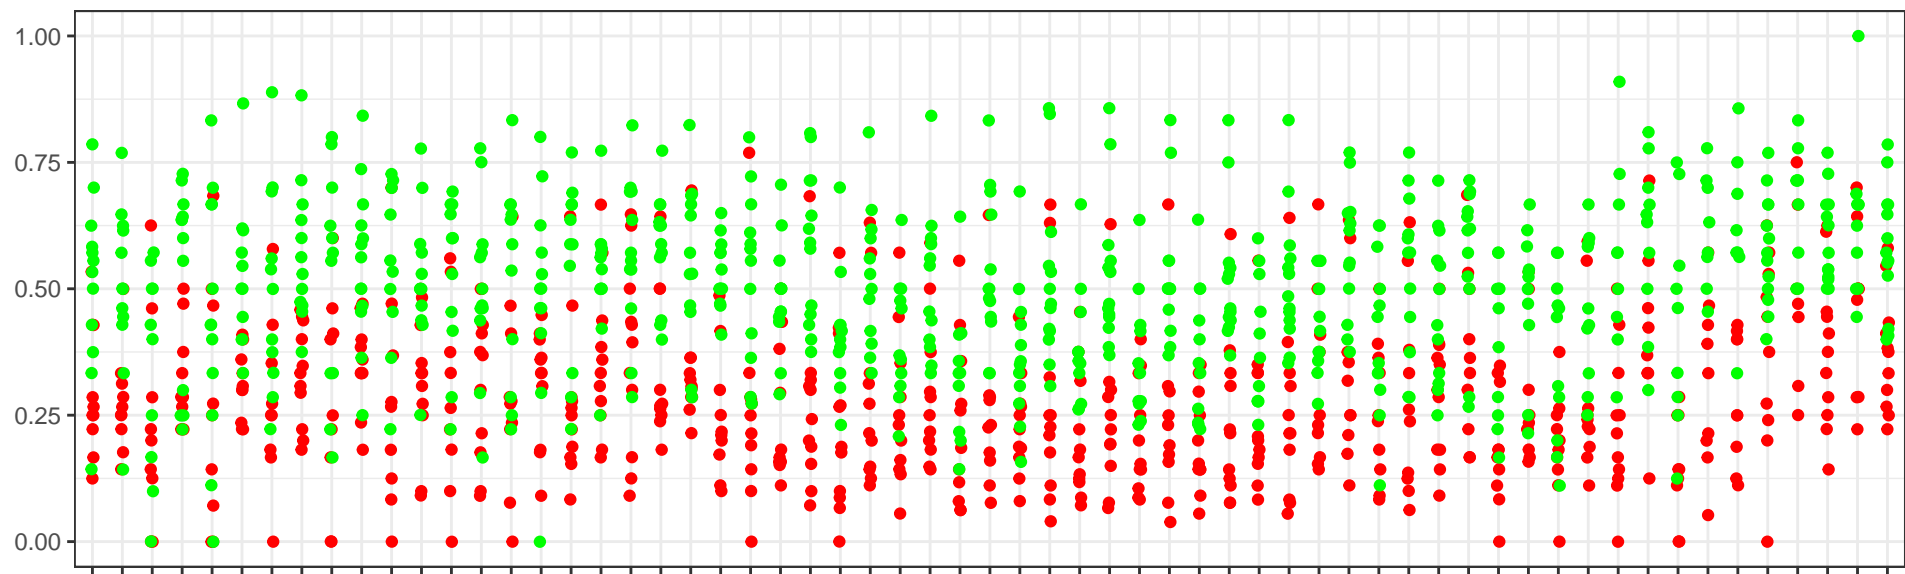

AC107959.4

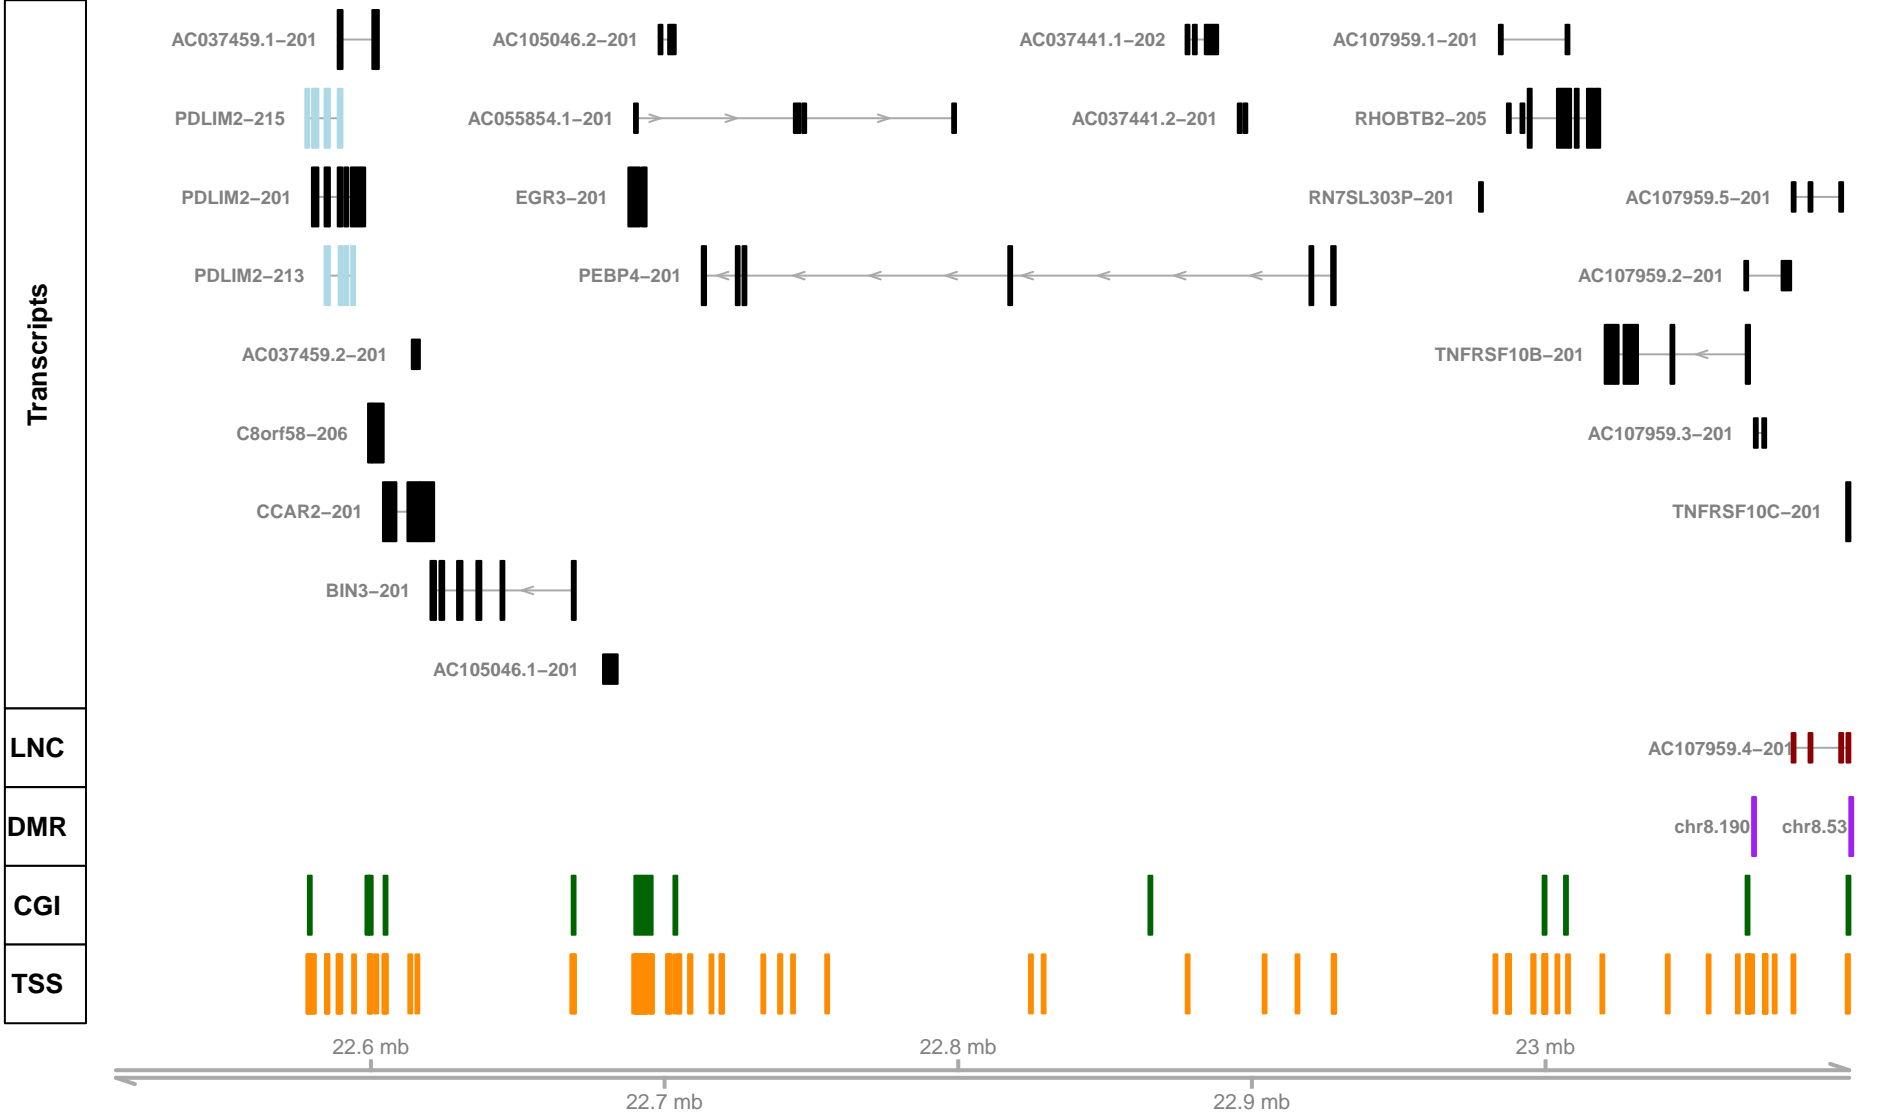

chr8.53

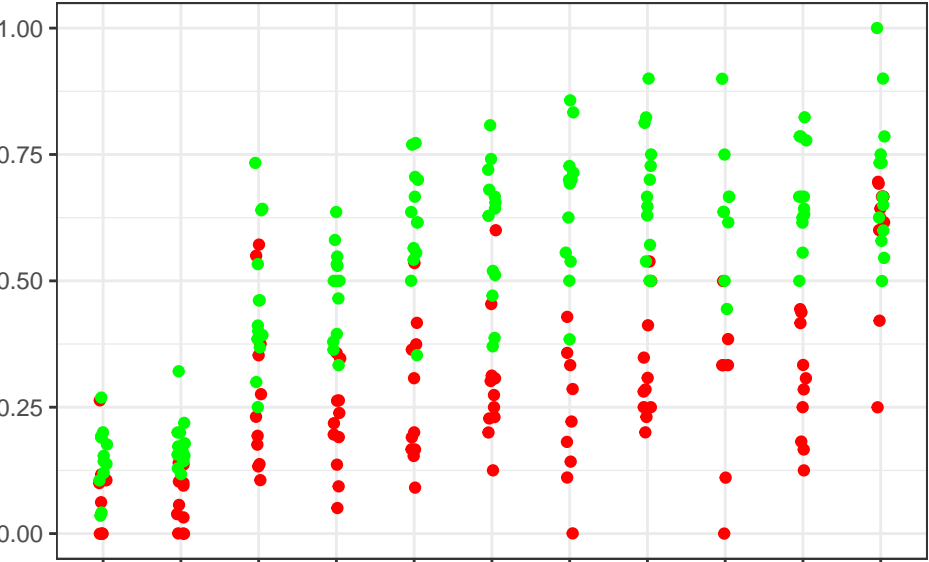

chr8.190

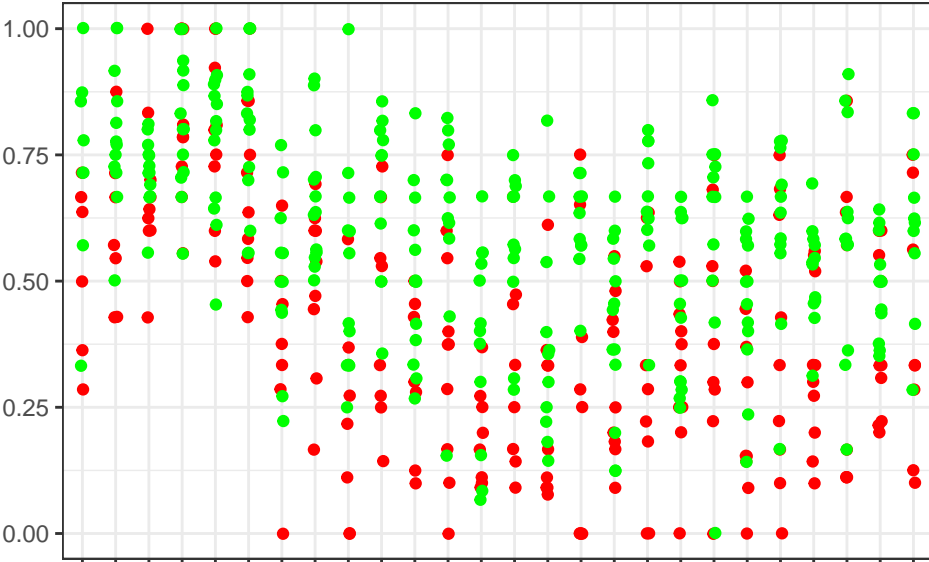

# AC112721.1

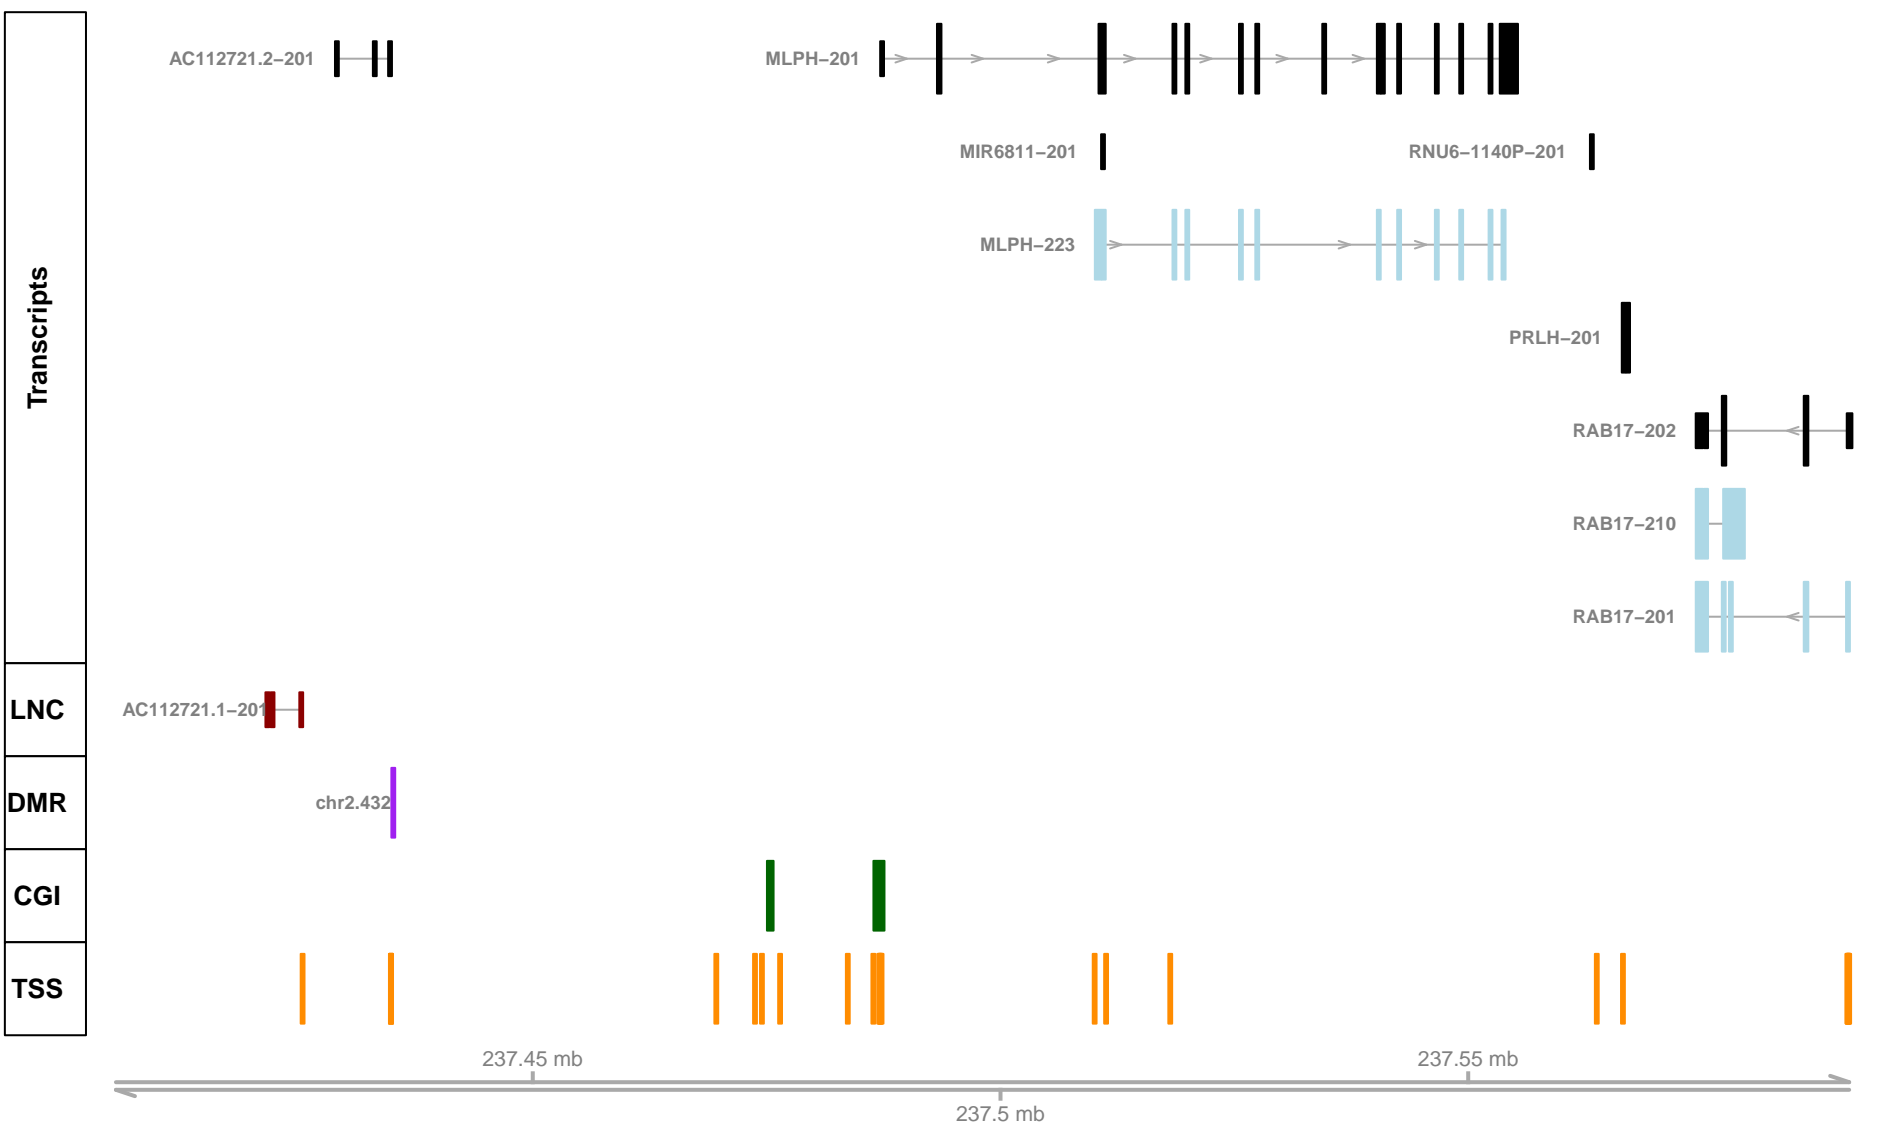

## chr2.432

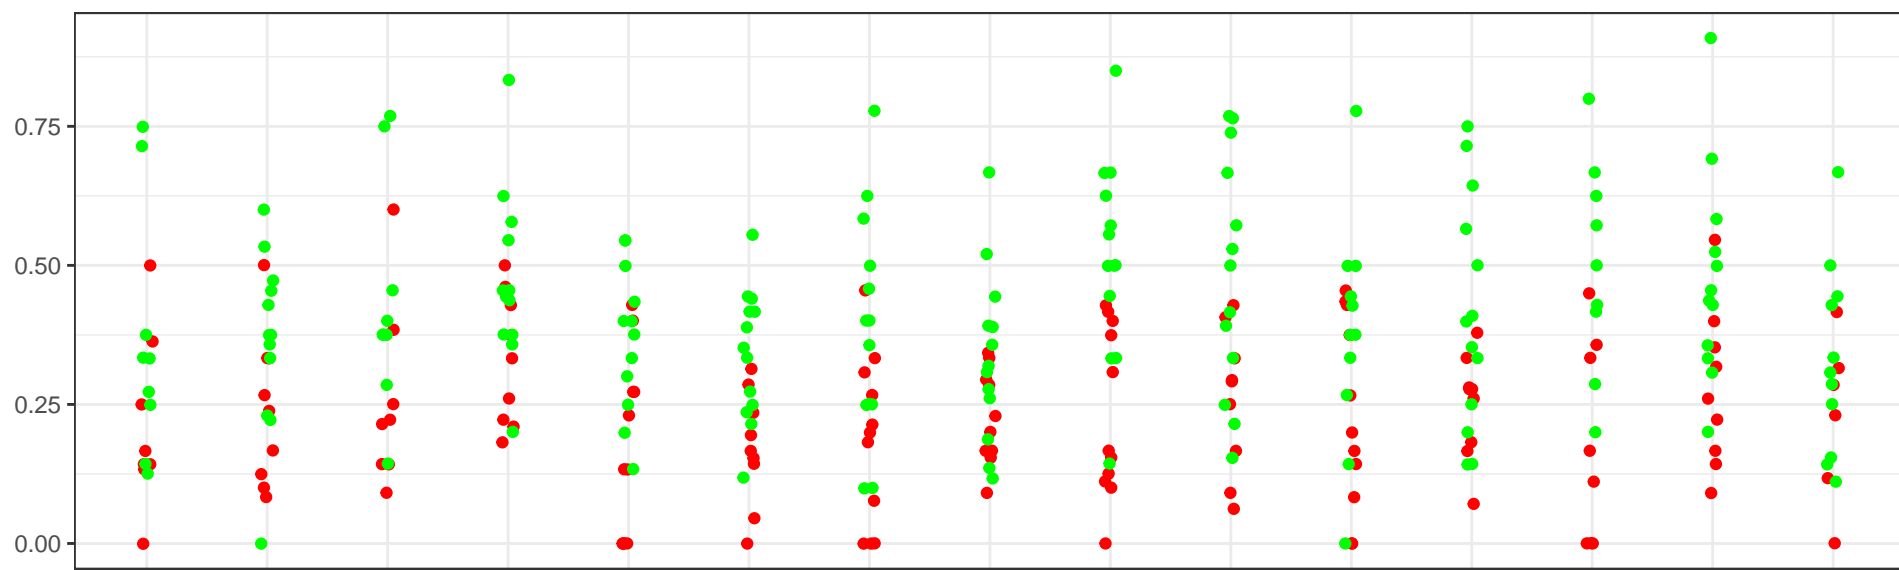

## AC112721.2

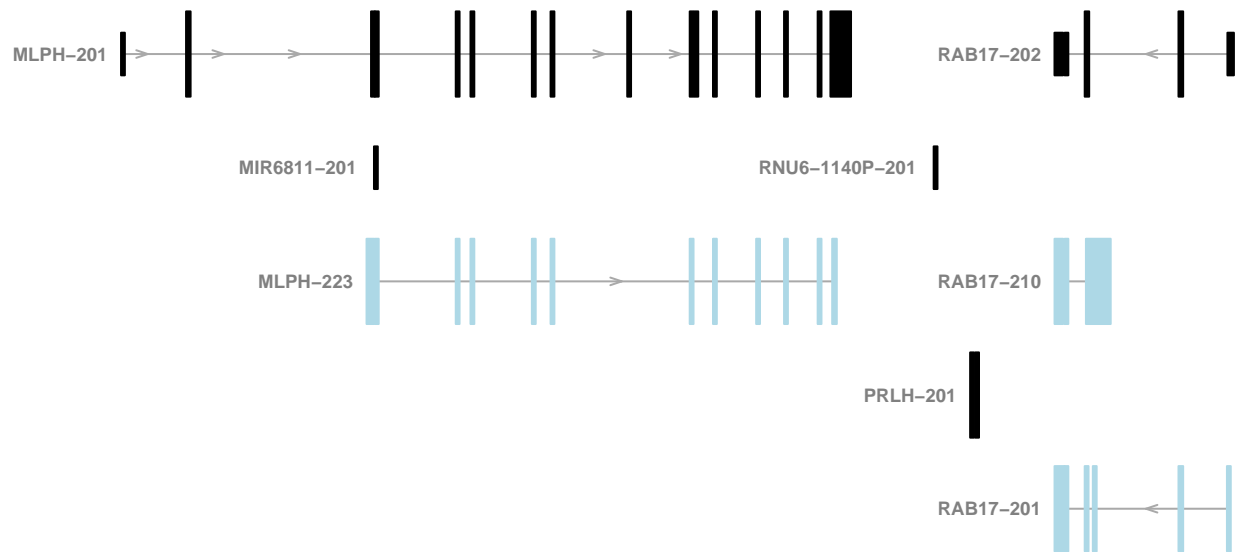

Transcripts

LNC

DMR

CGI

TSS

chr2.432

237.45 mb

237.5 mb

237.55 mb

## chr2.432

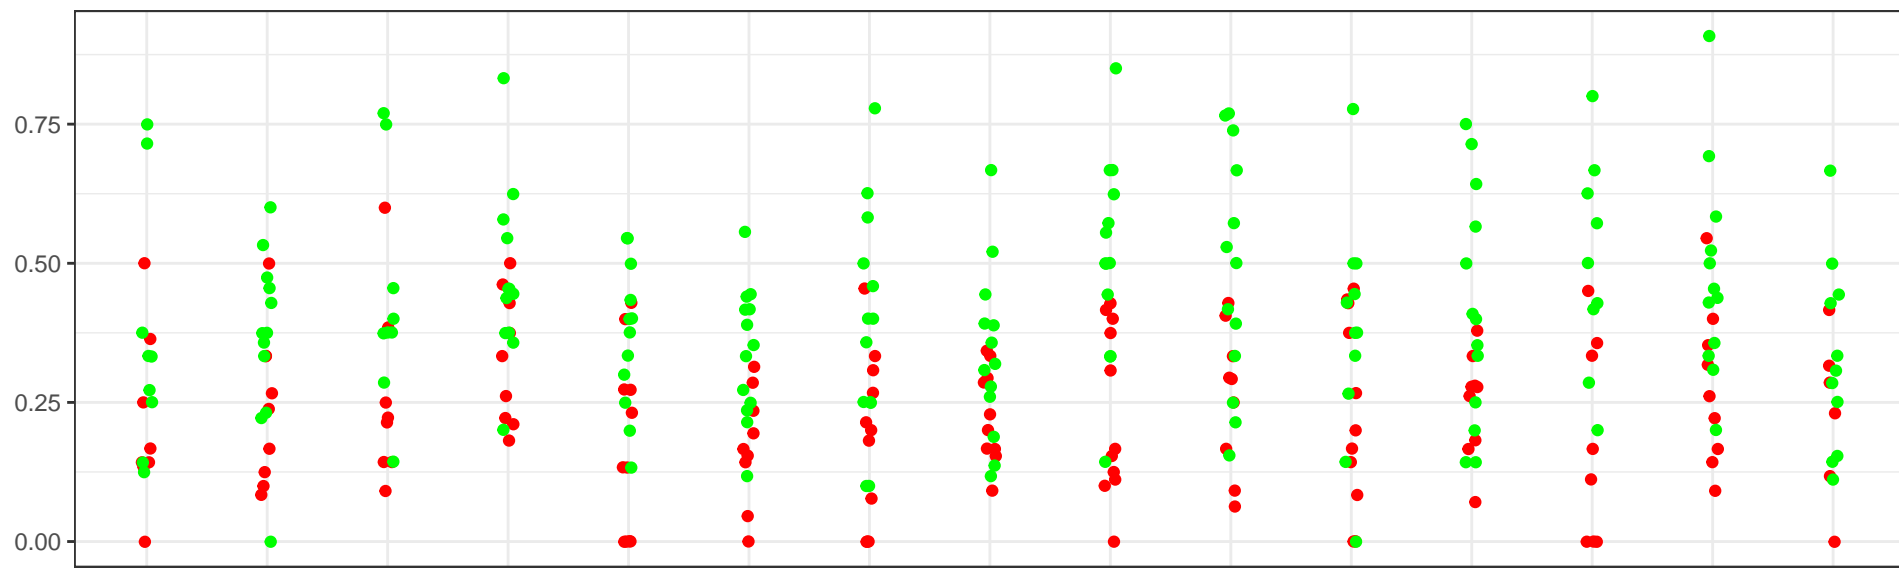

AC114812.2

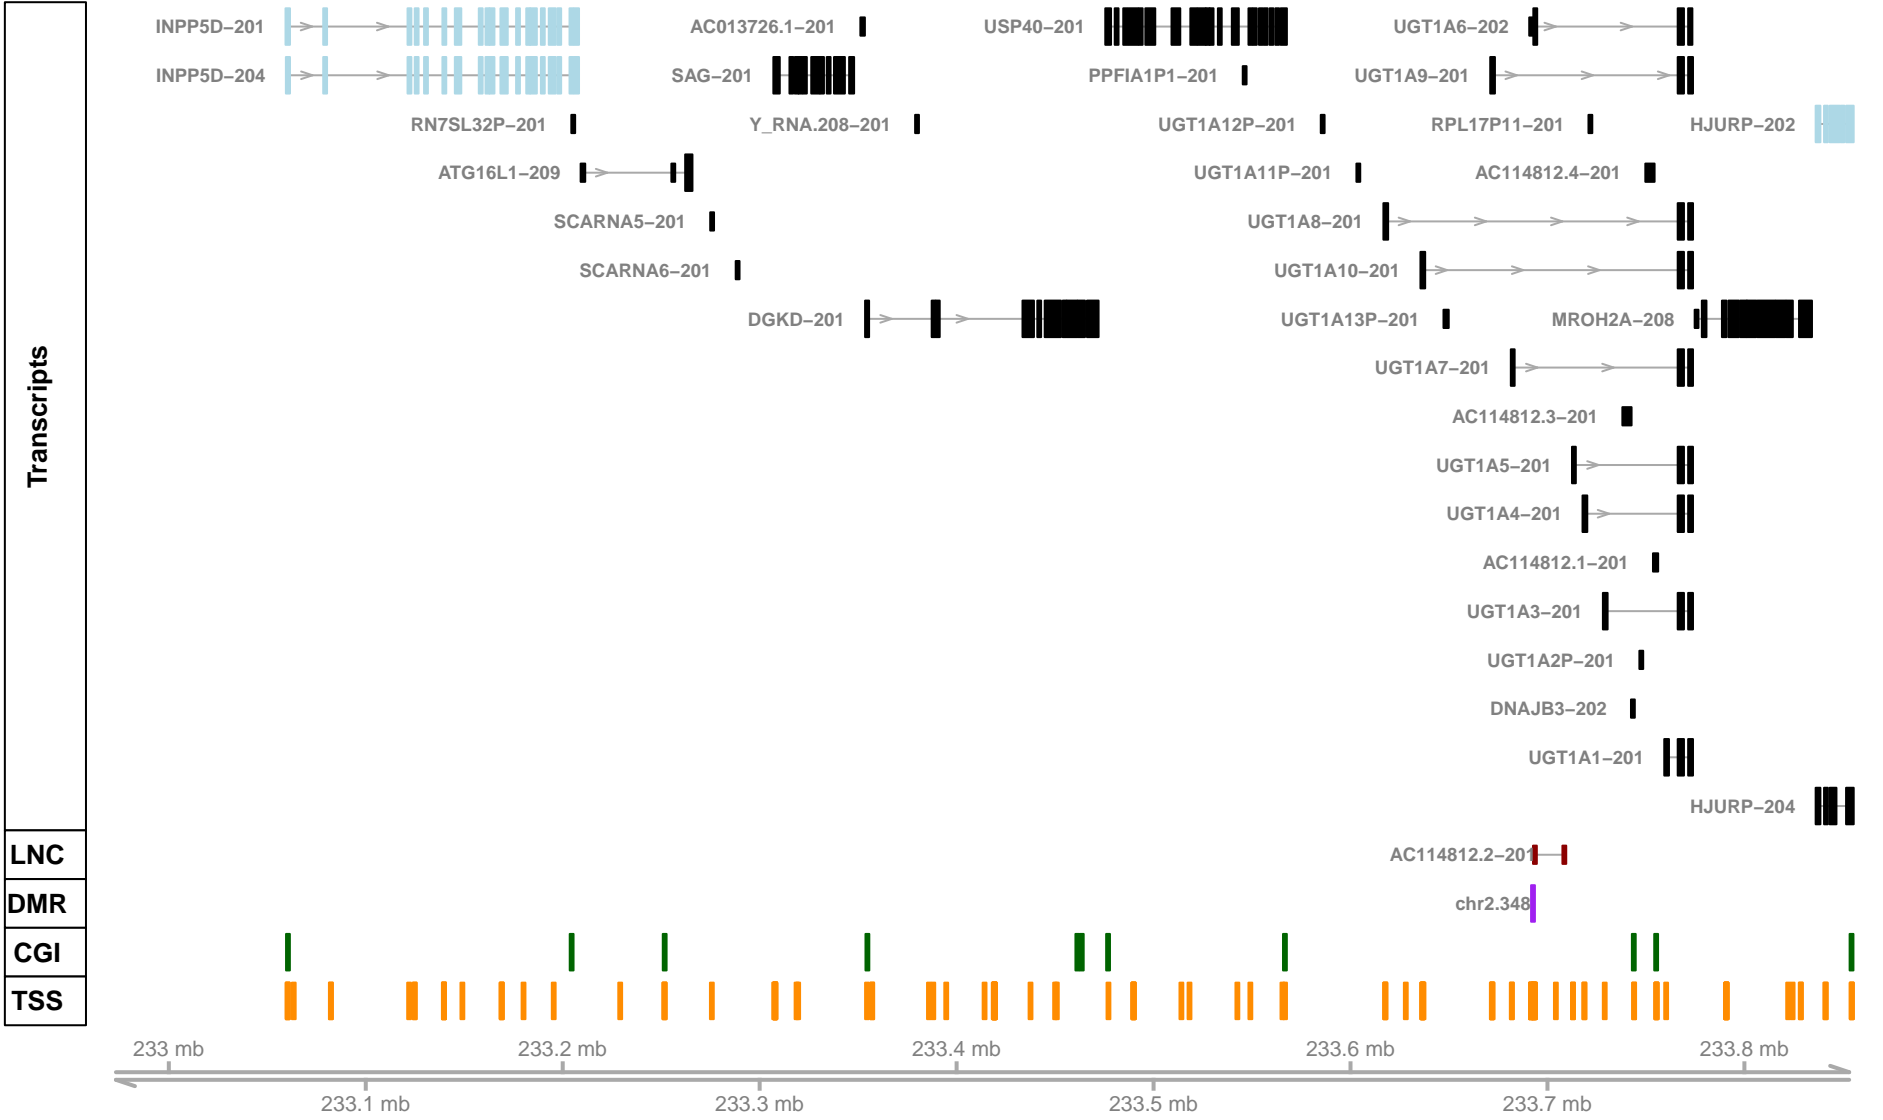

chr2.348

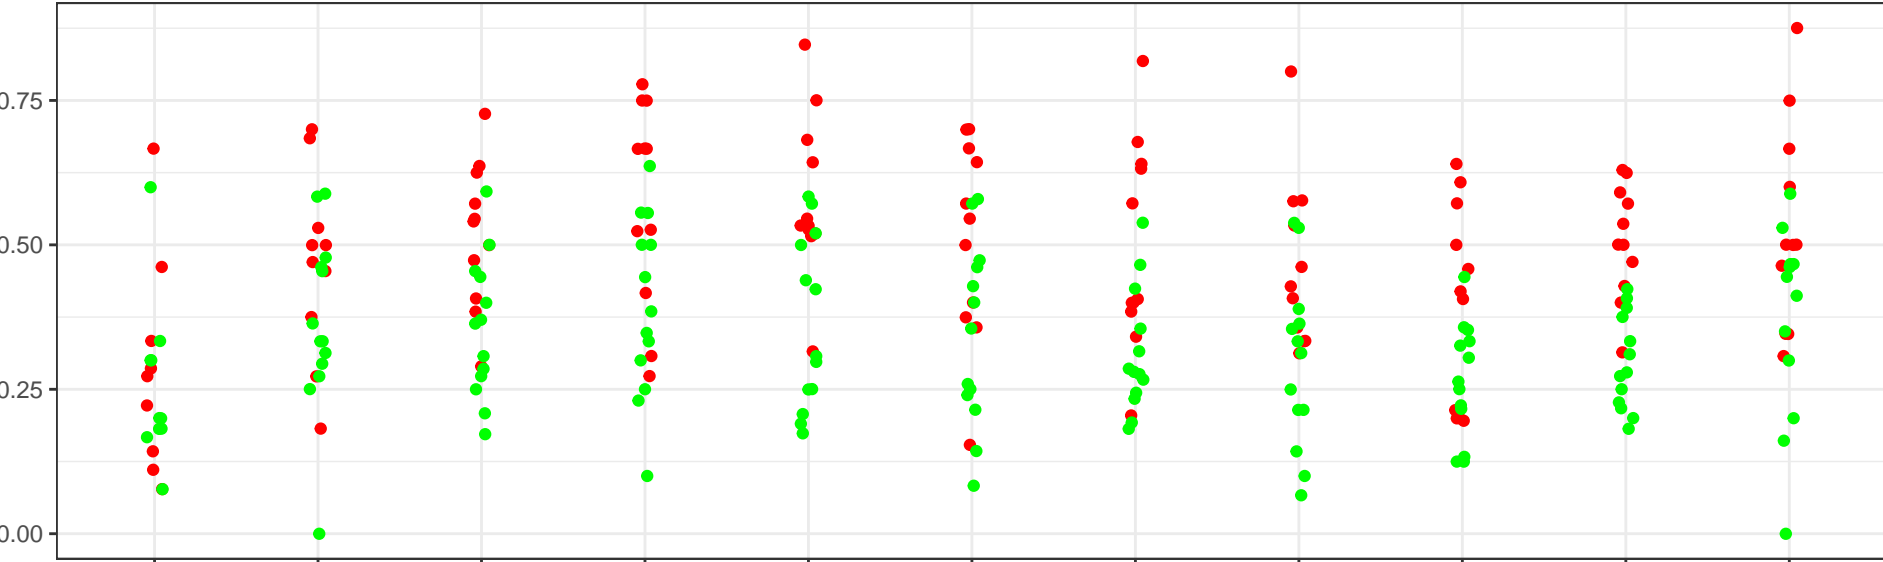

AC116366.1

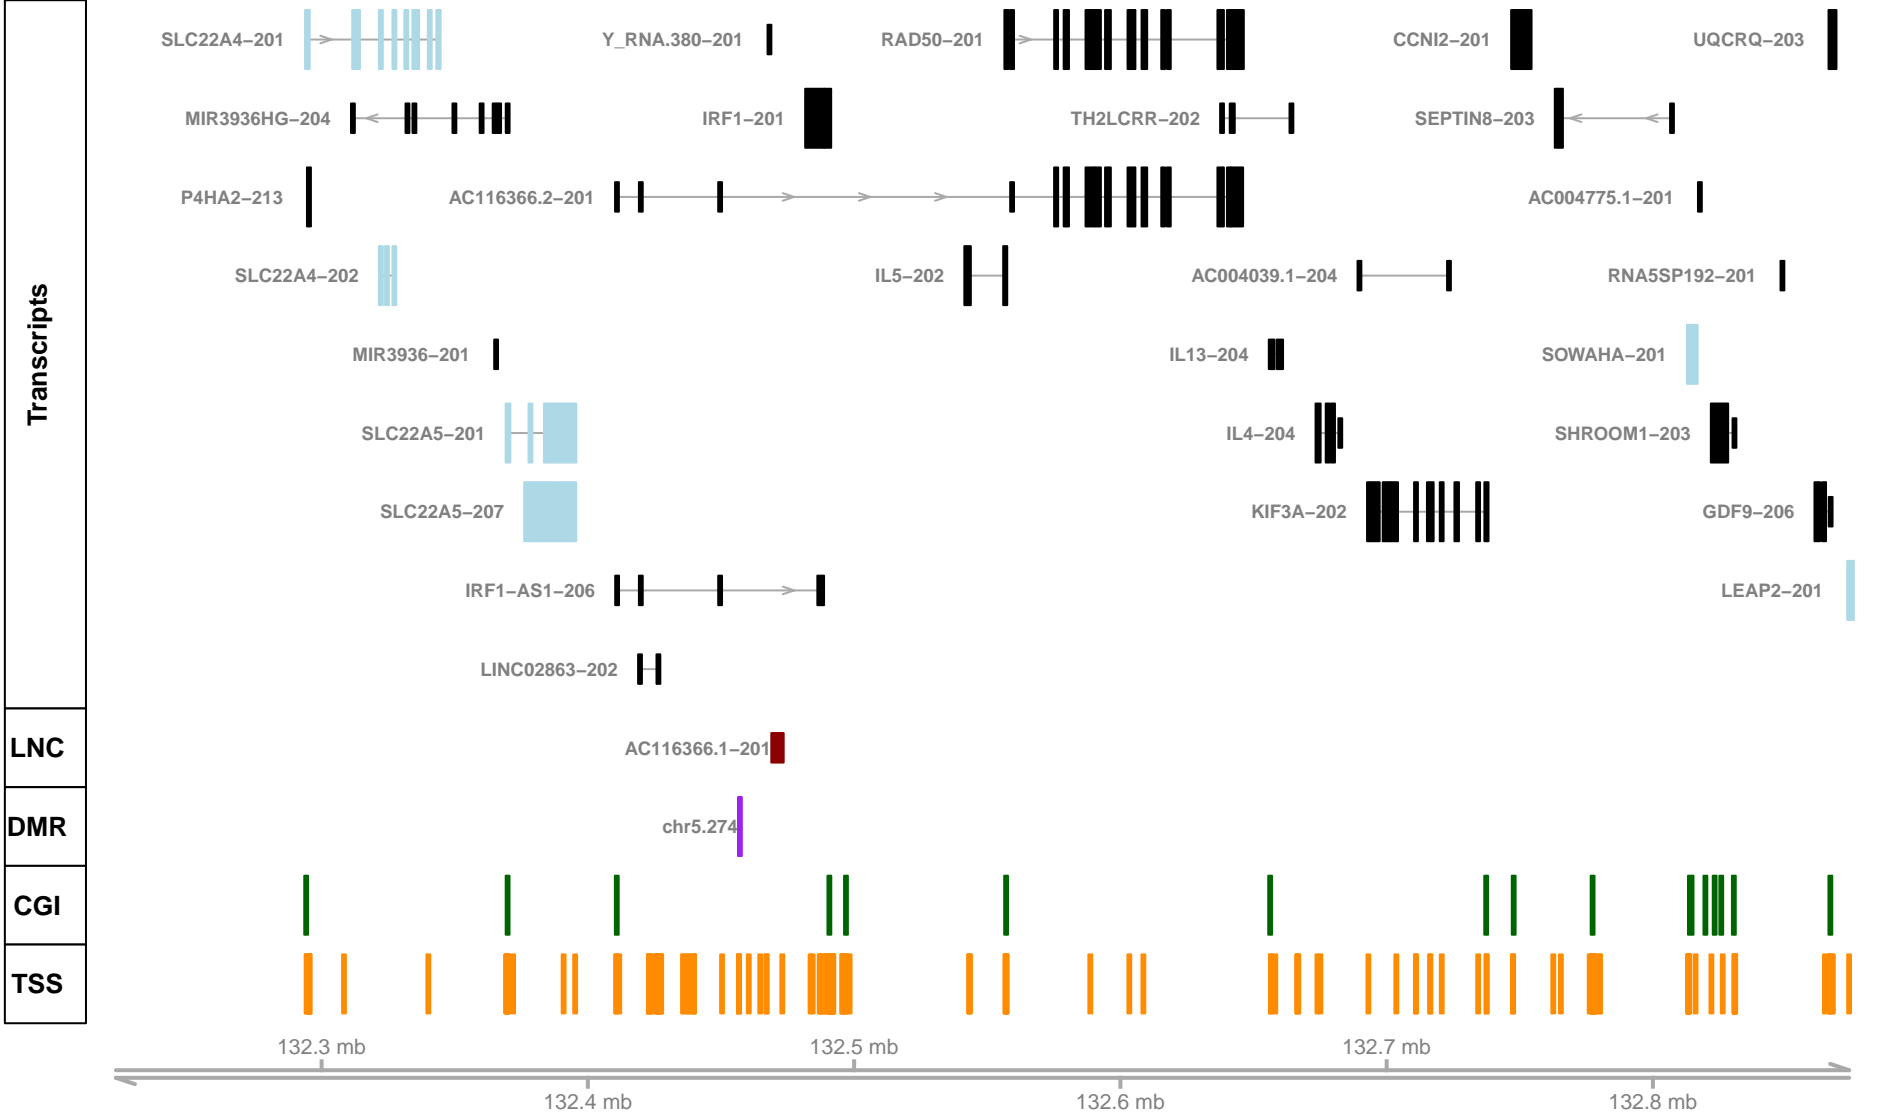

chr5.274

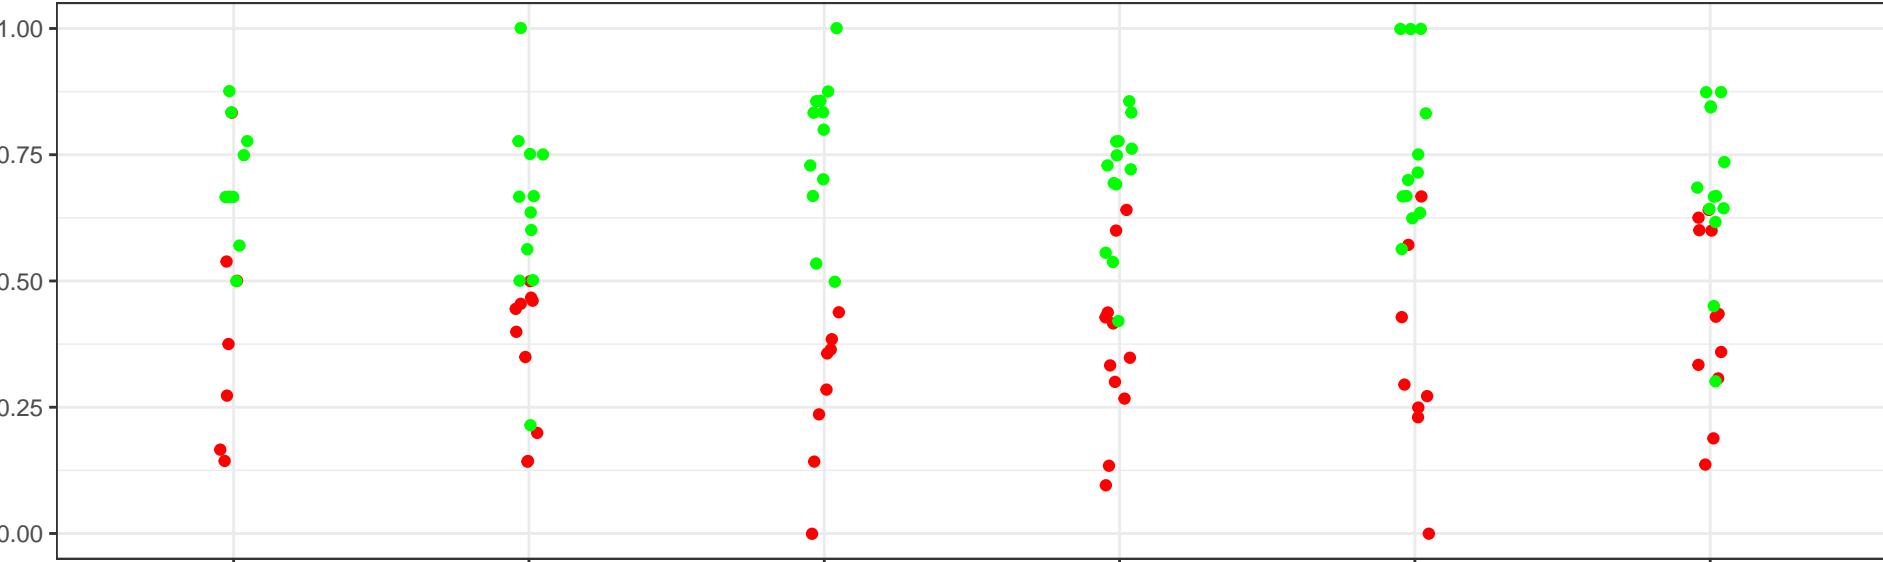

AC123567.2

Transcripts

LNC

DMR

CGI

TSS

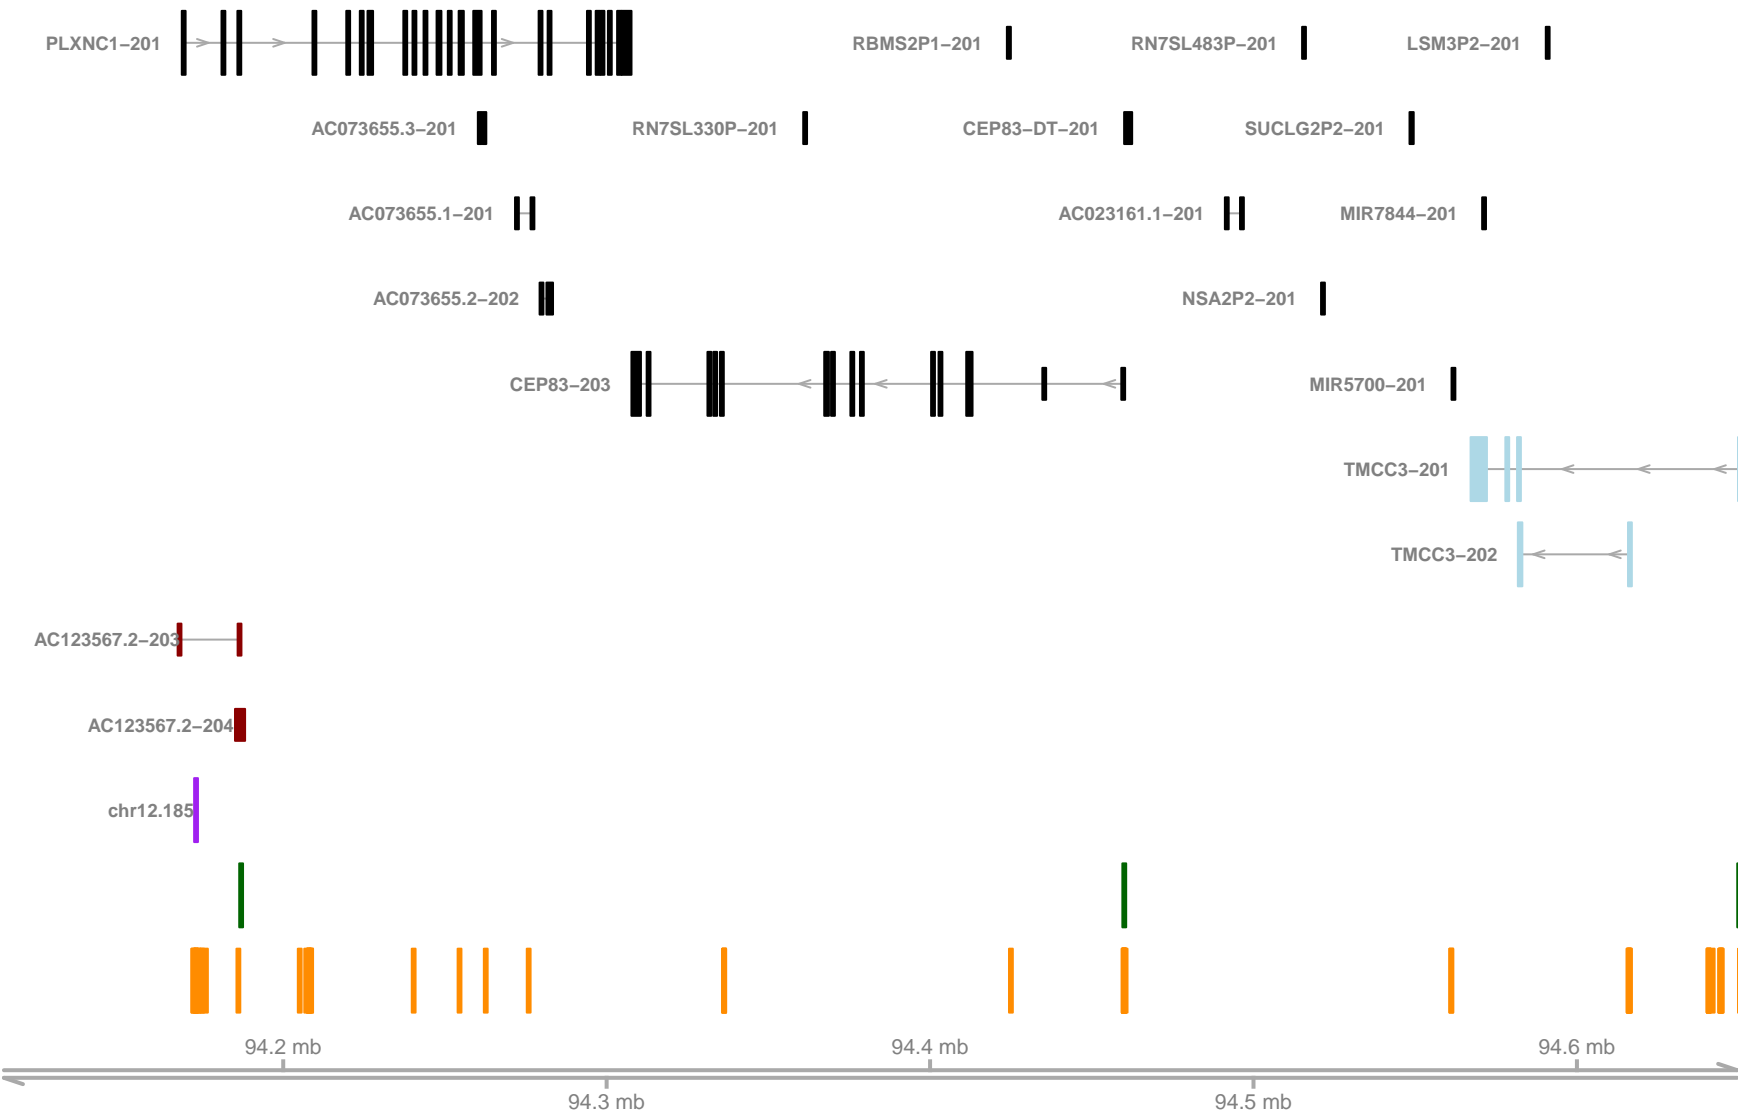

chr12.185

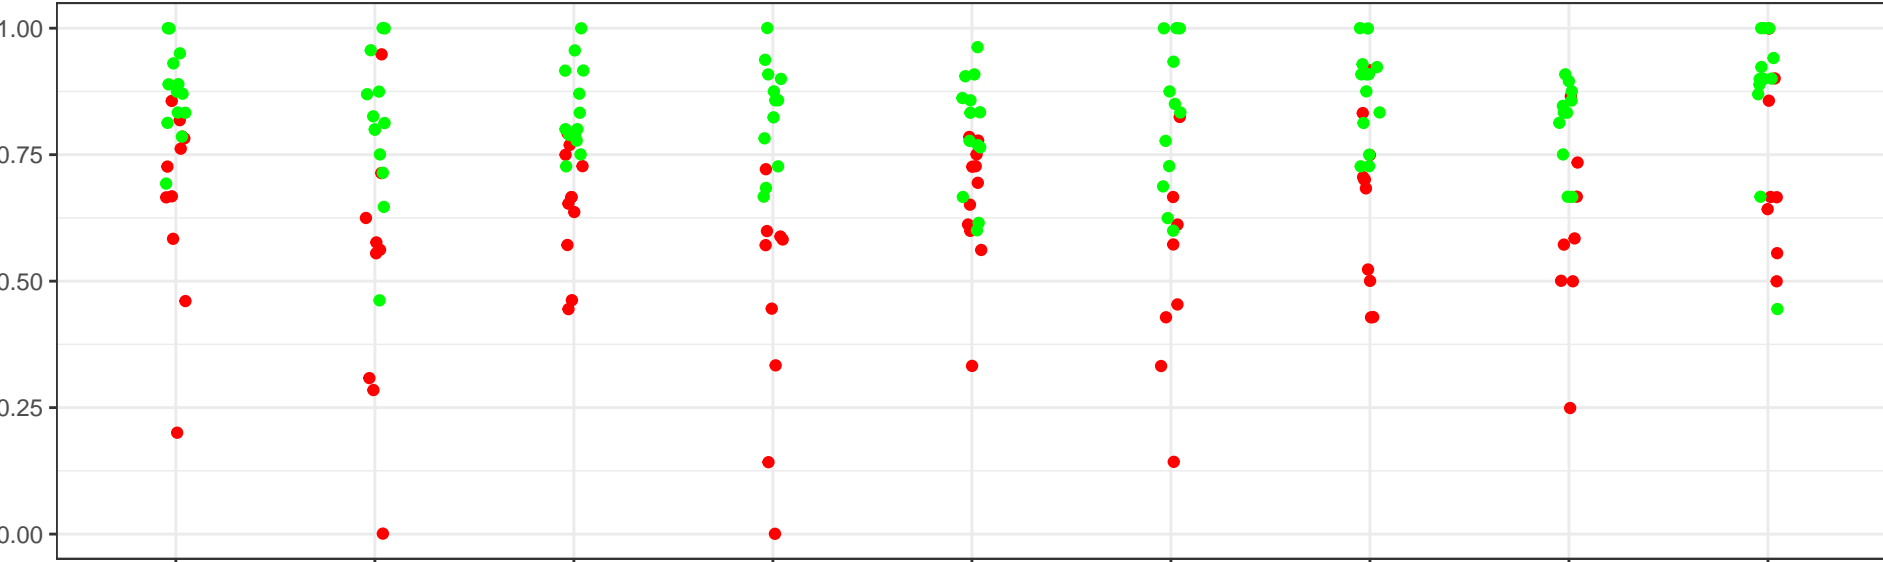

# AC127526.2

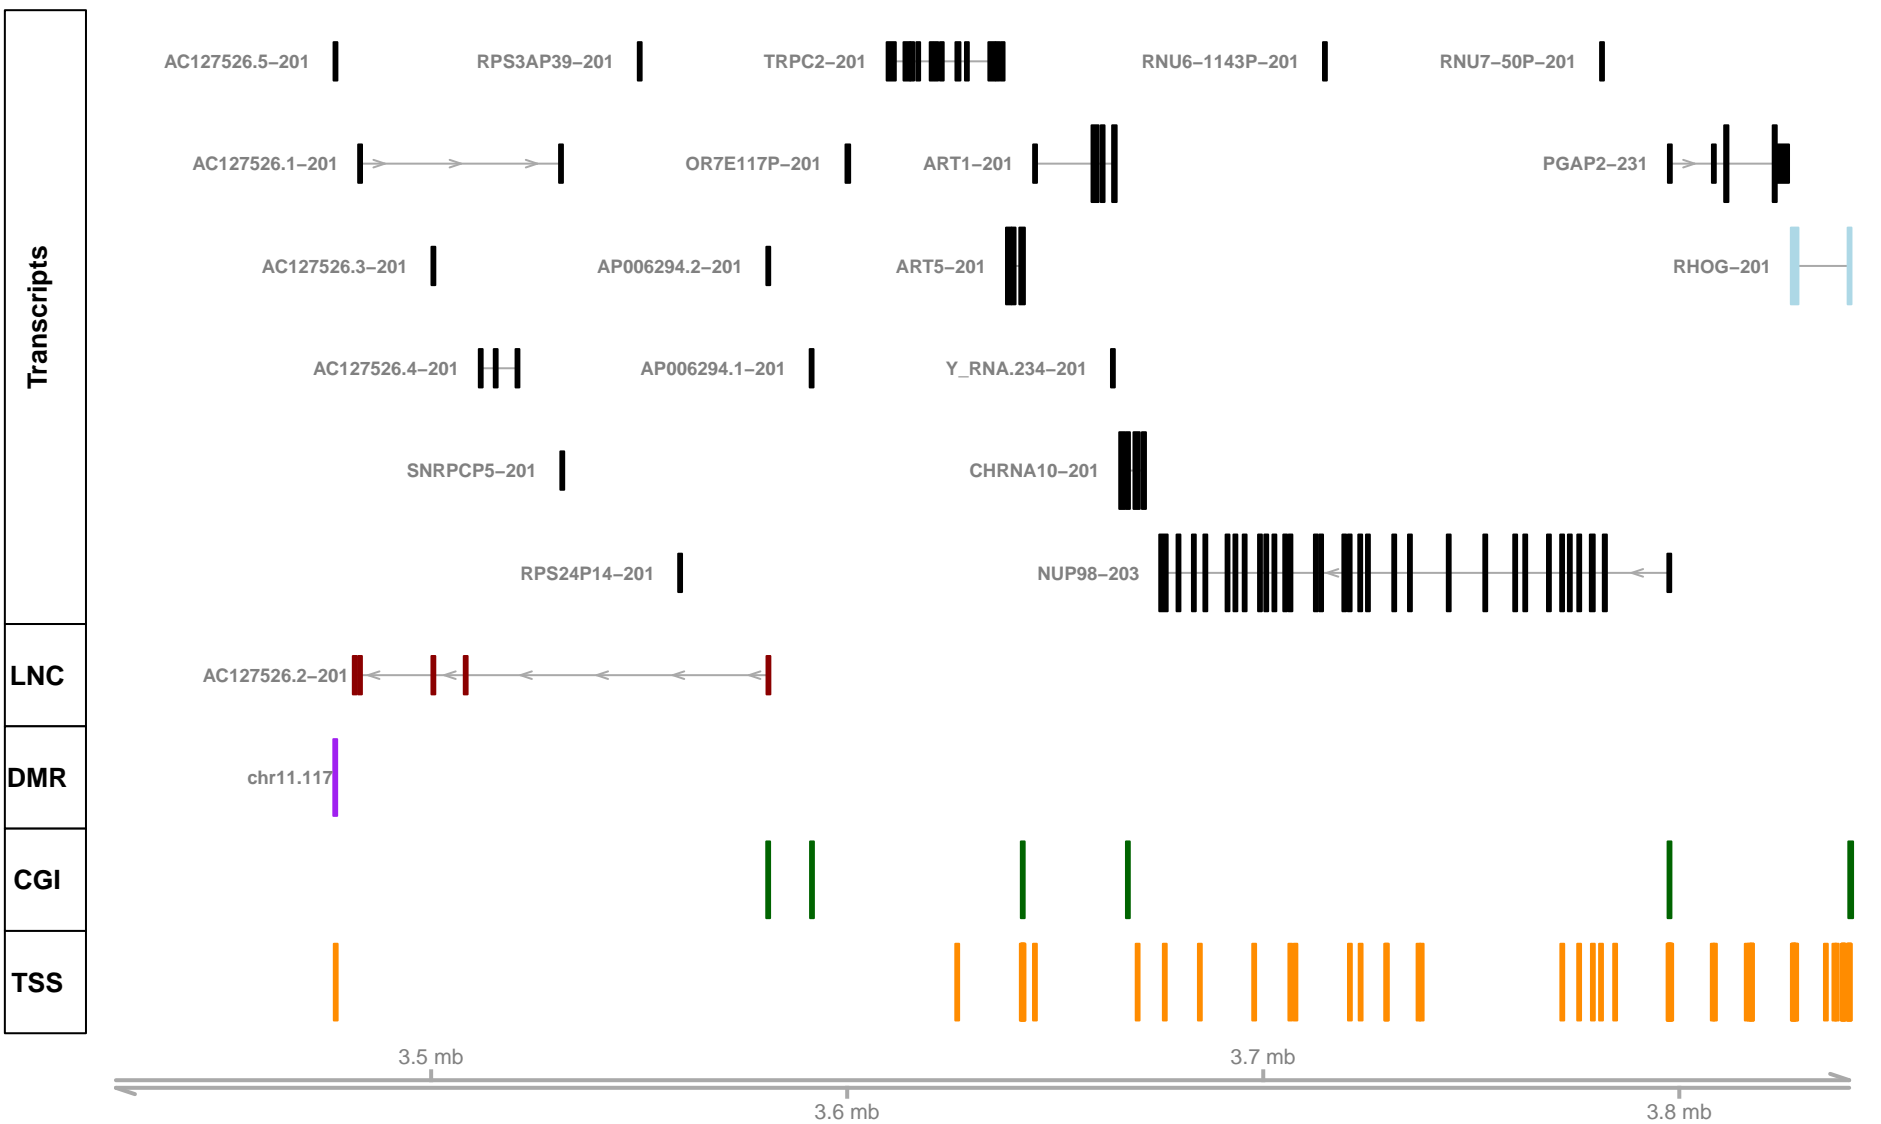

## chr11.117

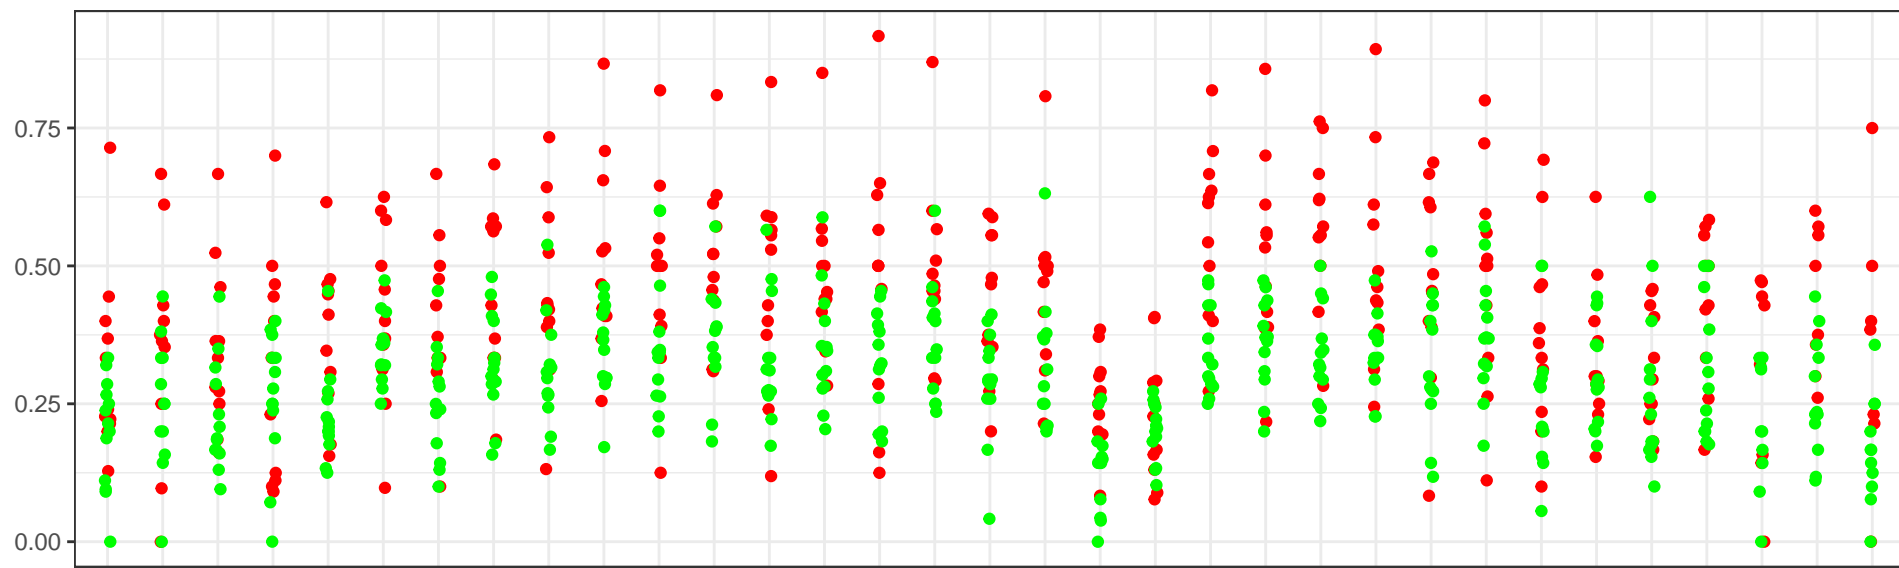

AC133644.2

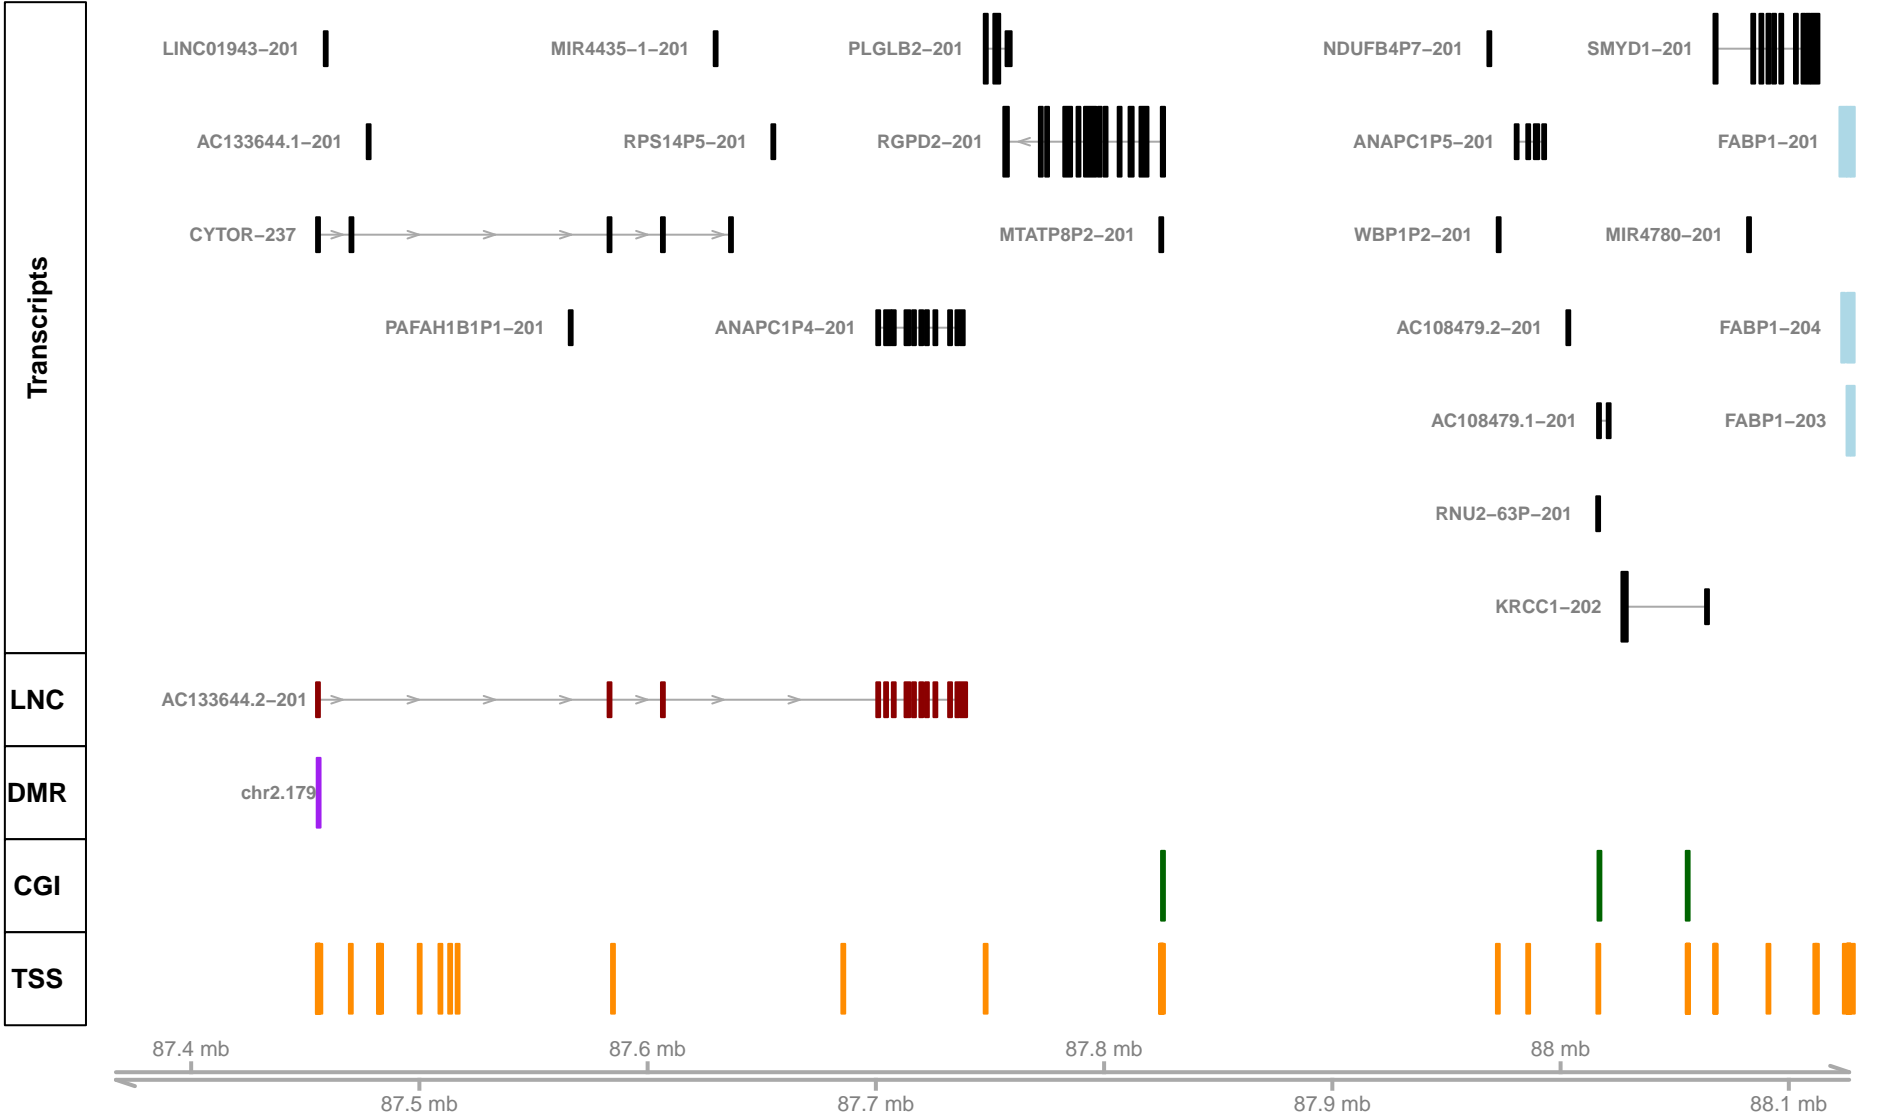

chr2.179

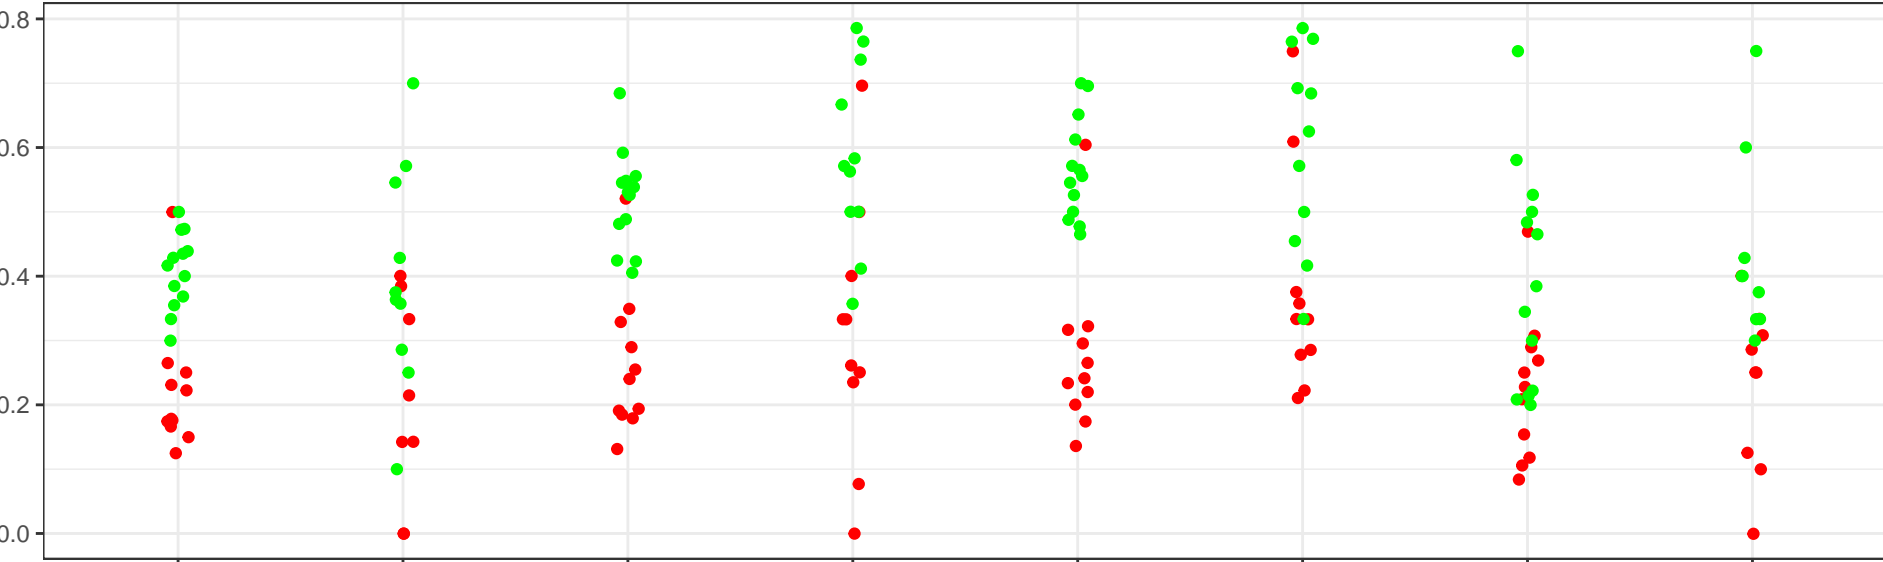

AC136475.1

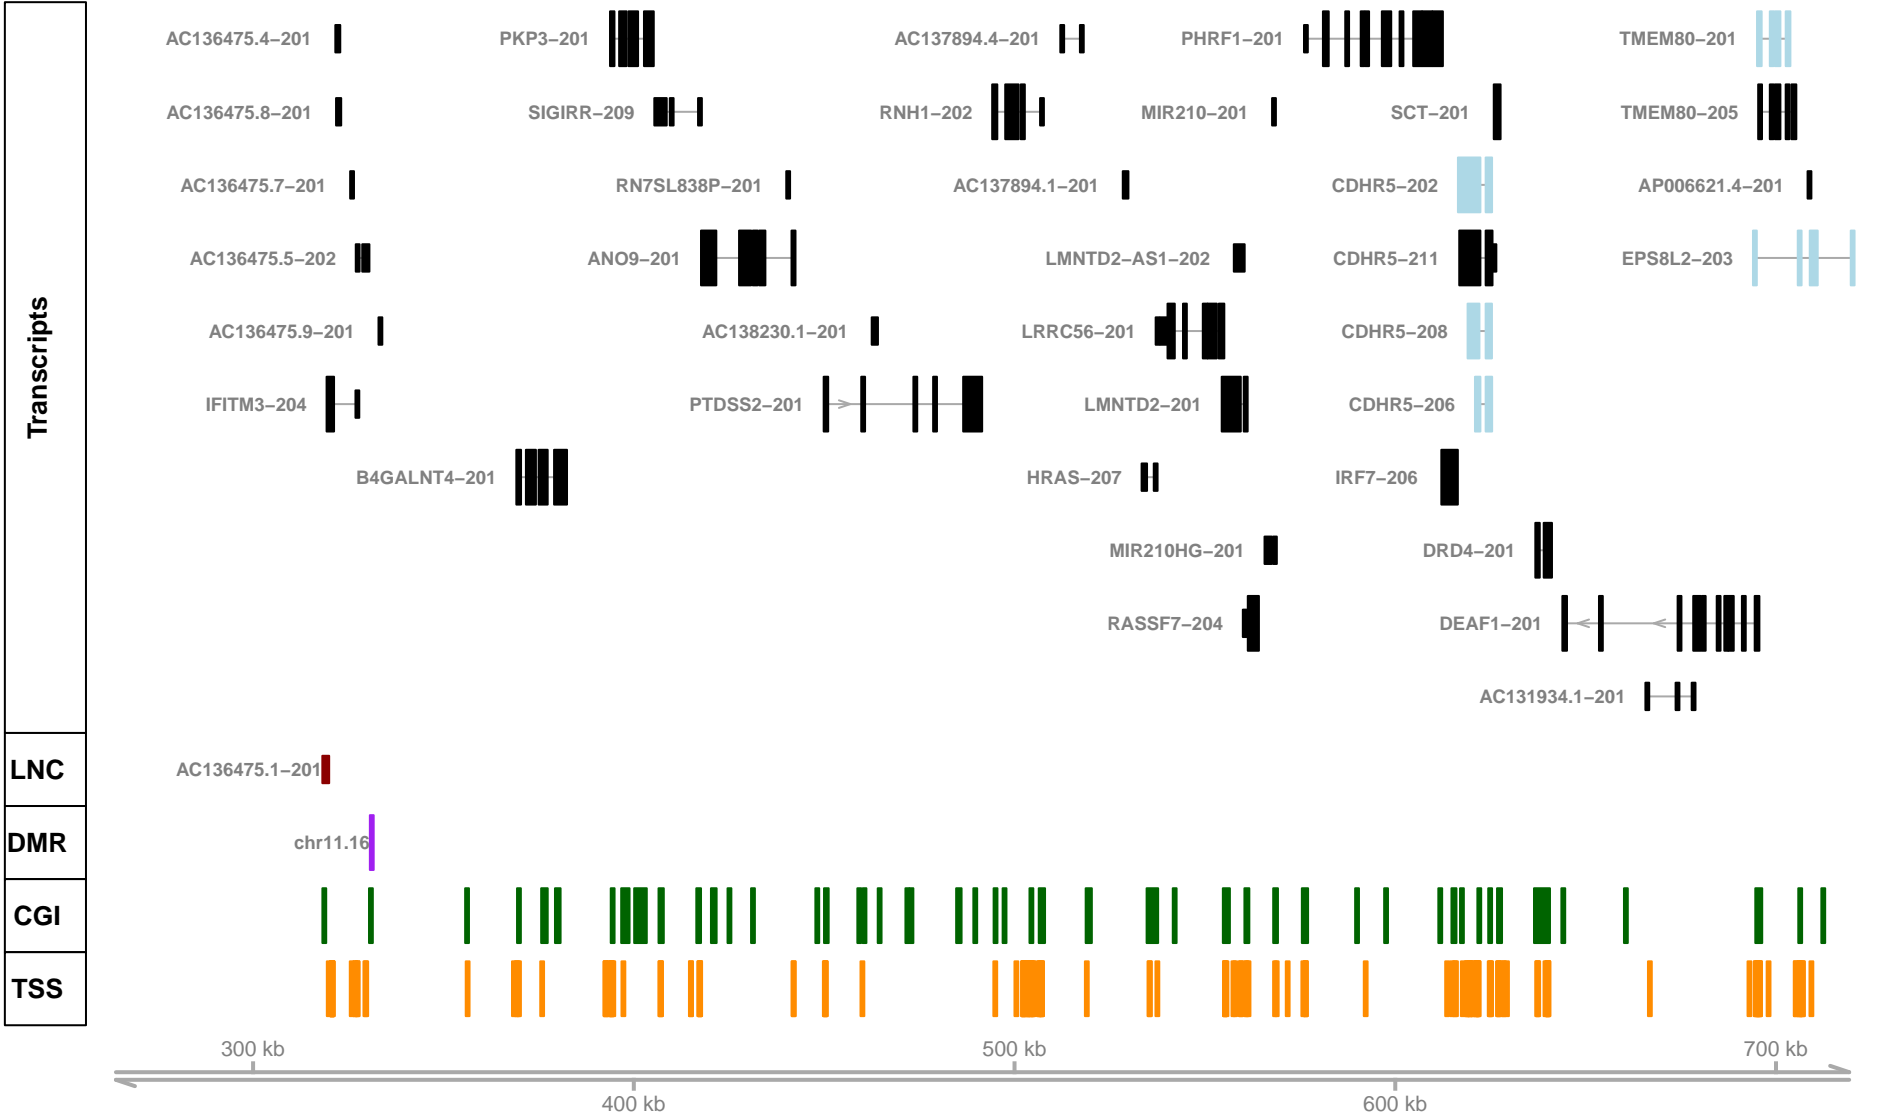

chr11.16

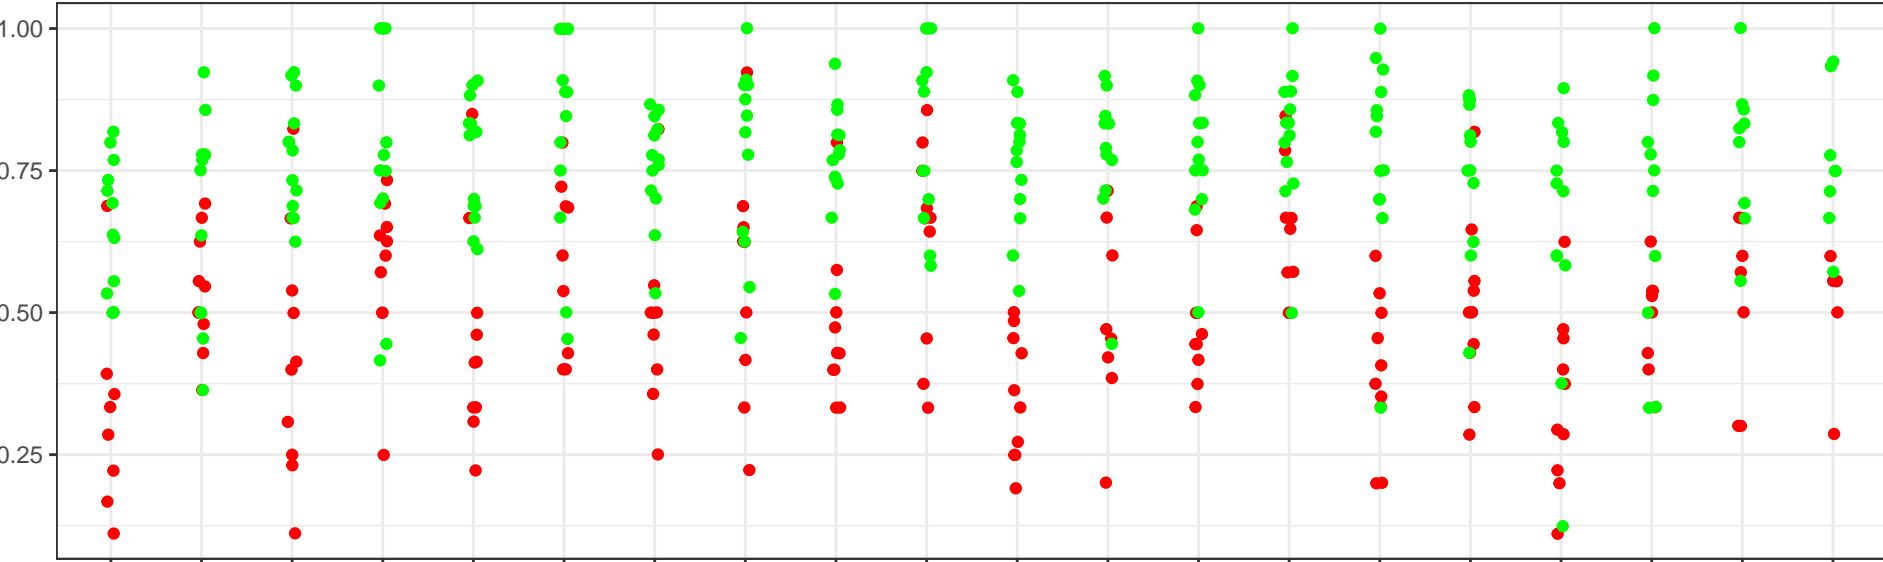

AC136475.2

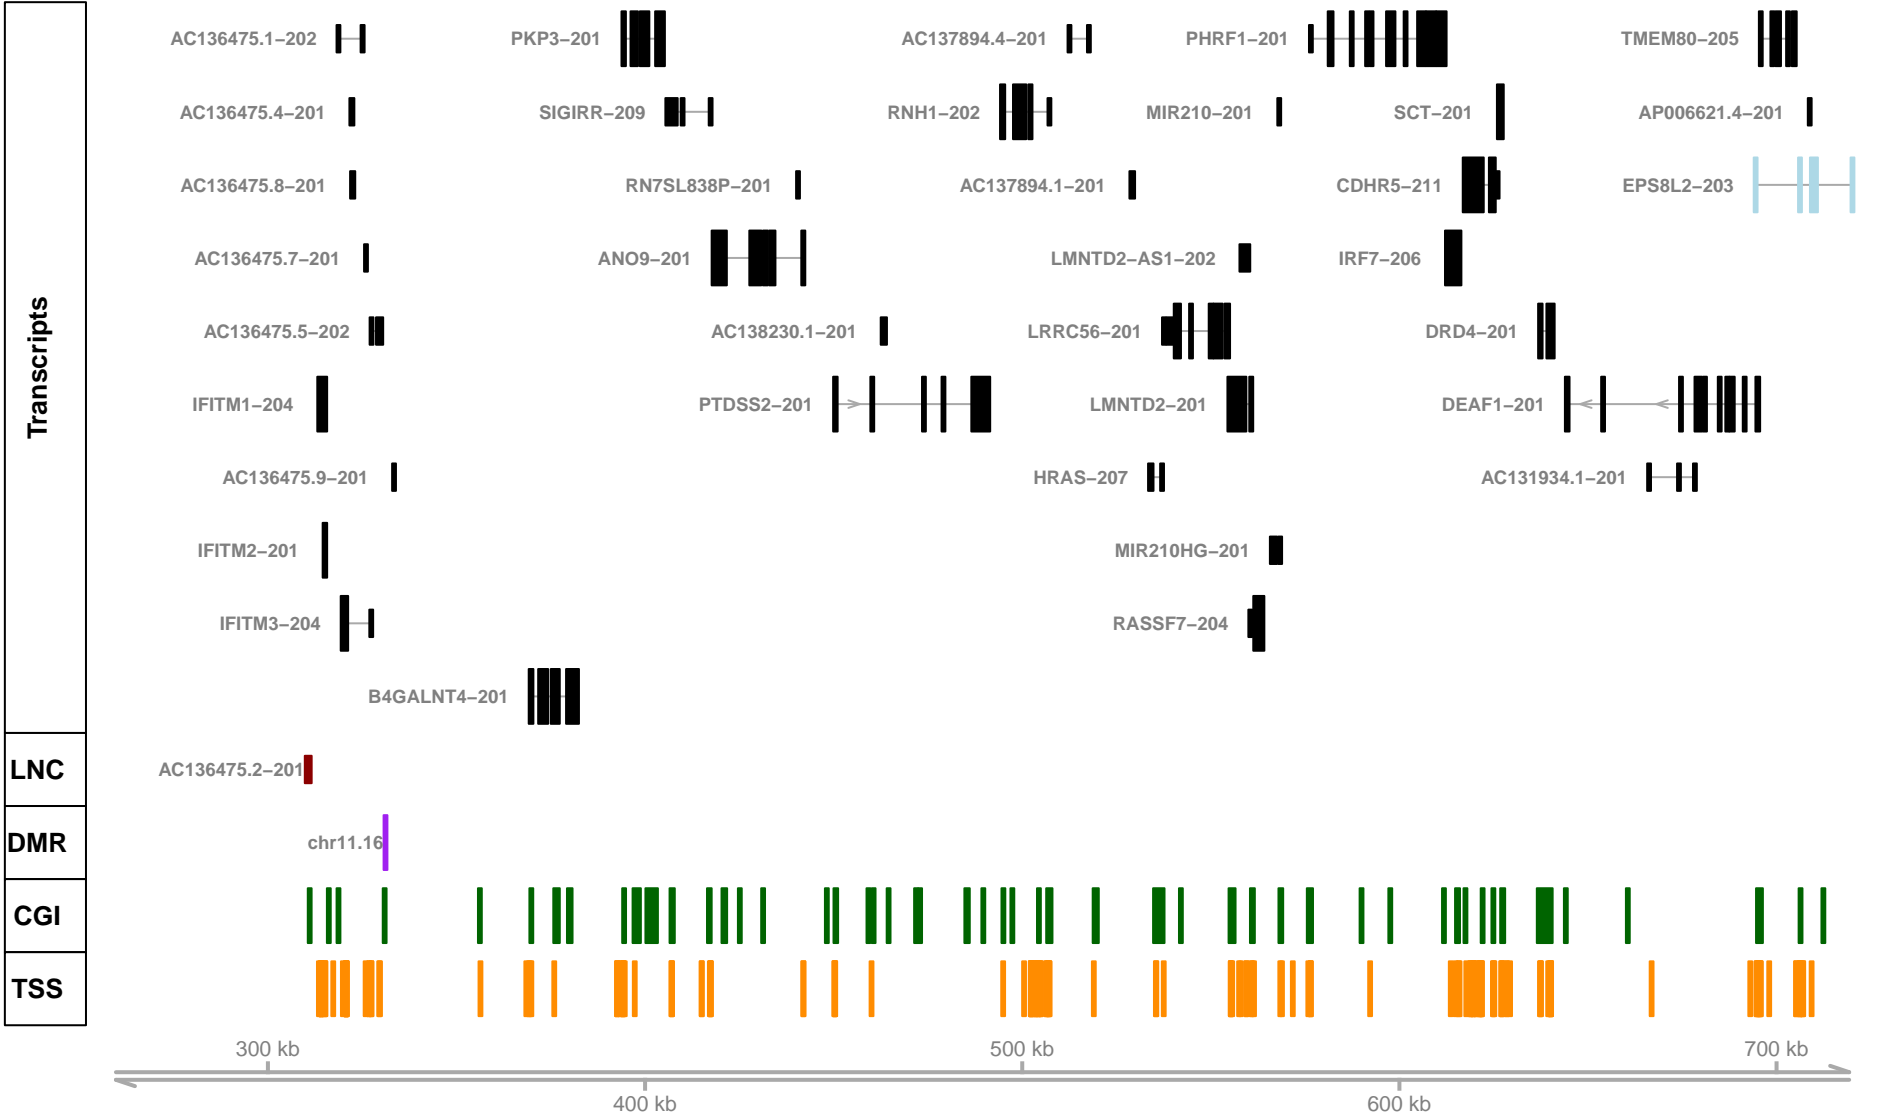

chr11.16

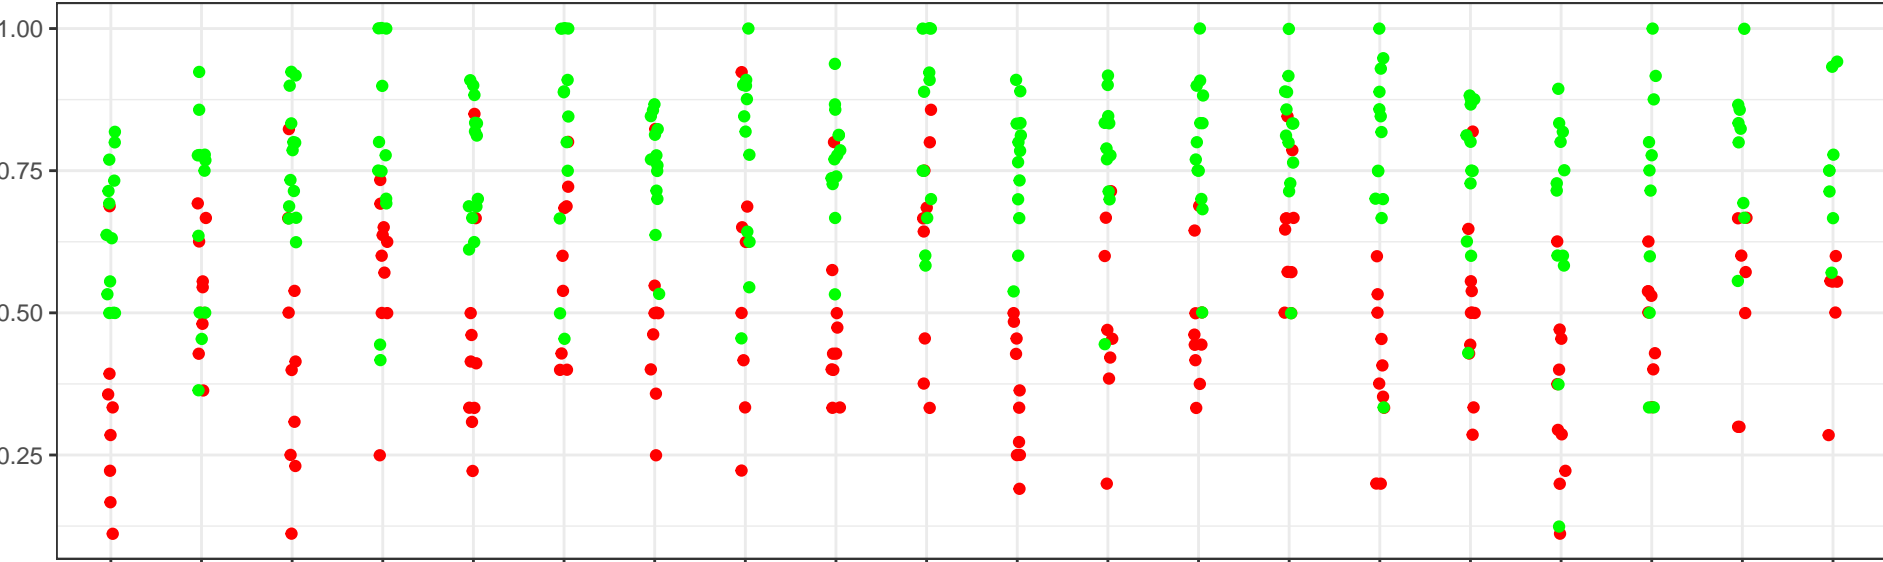

AC136475.3

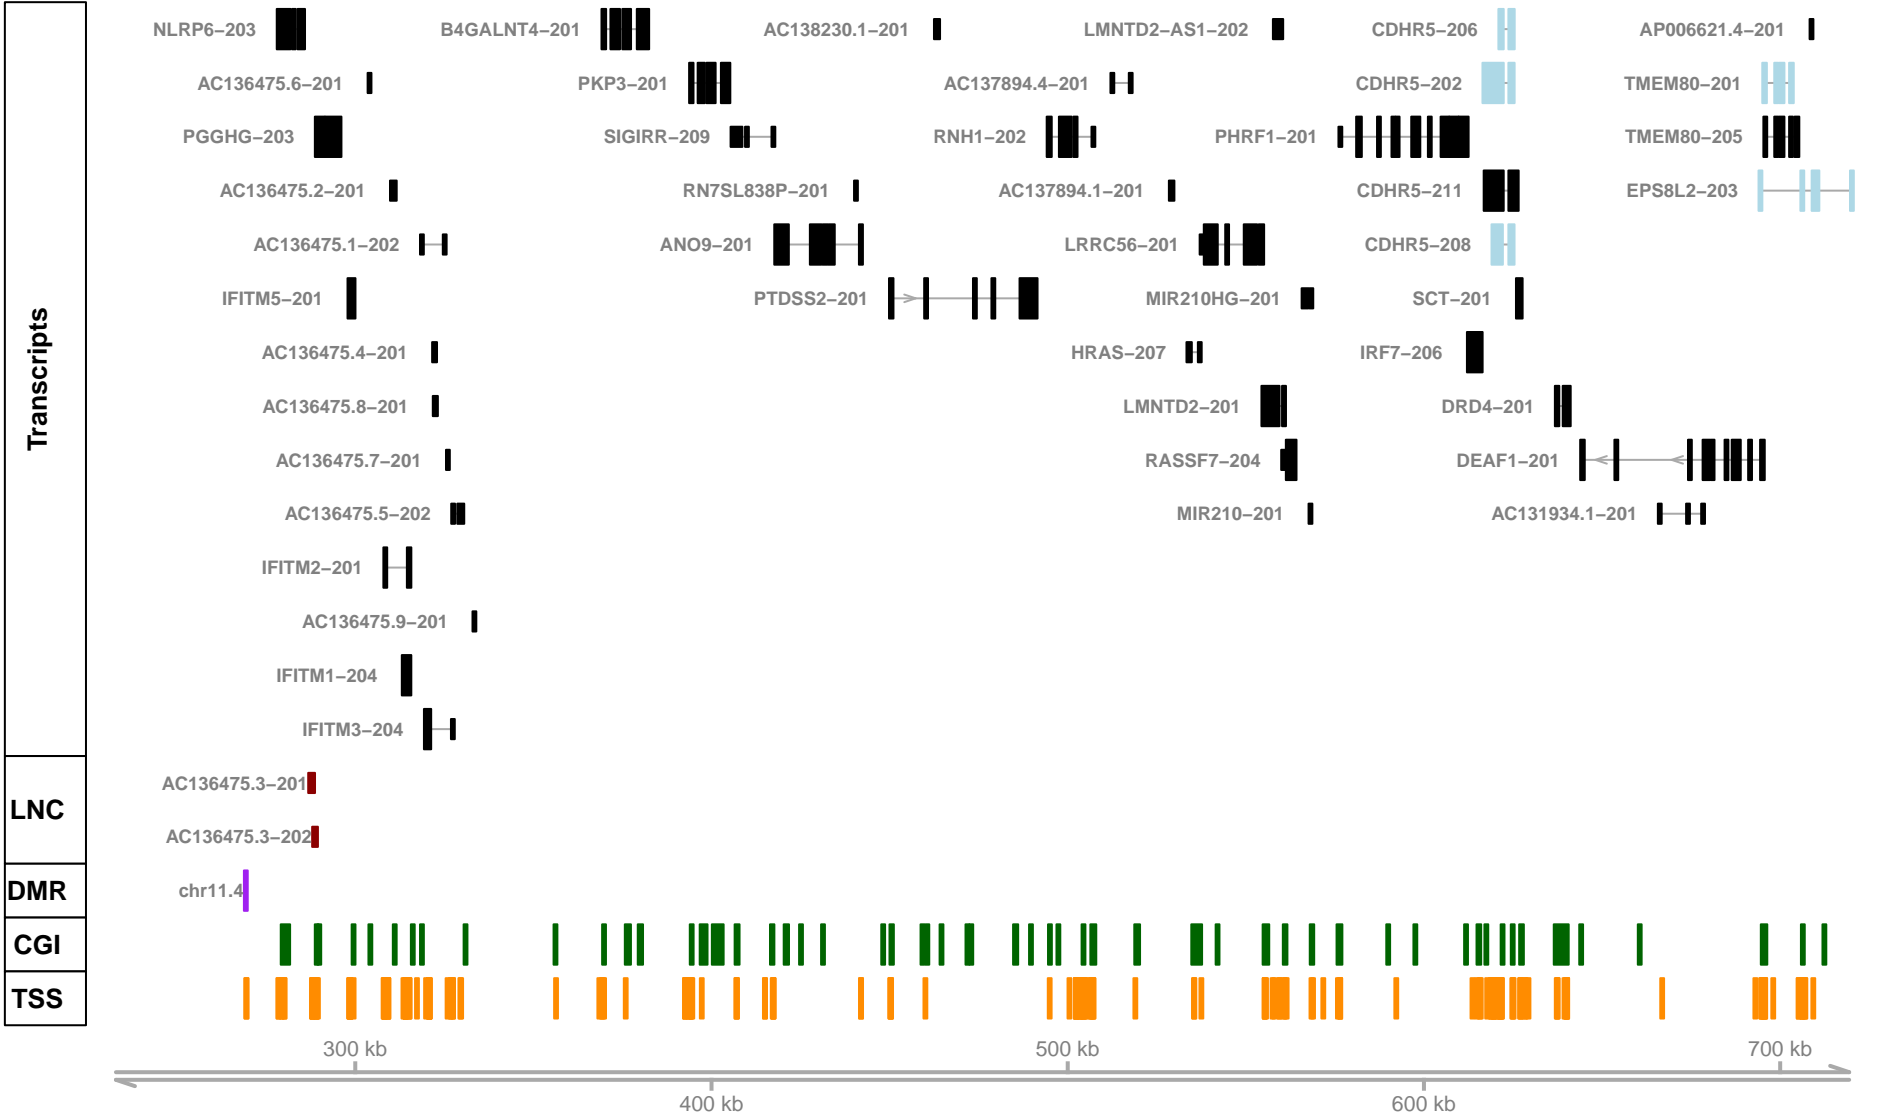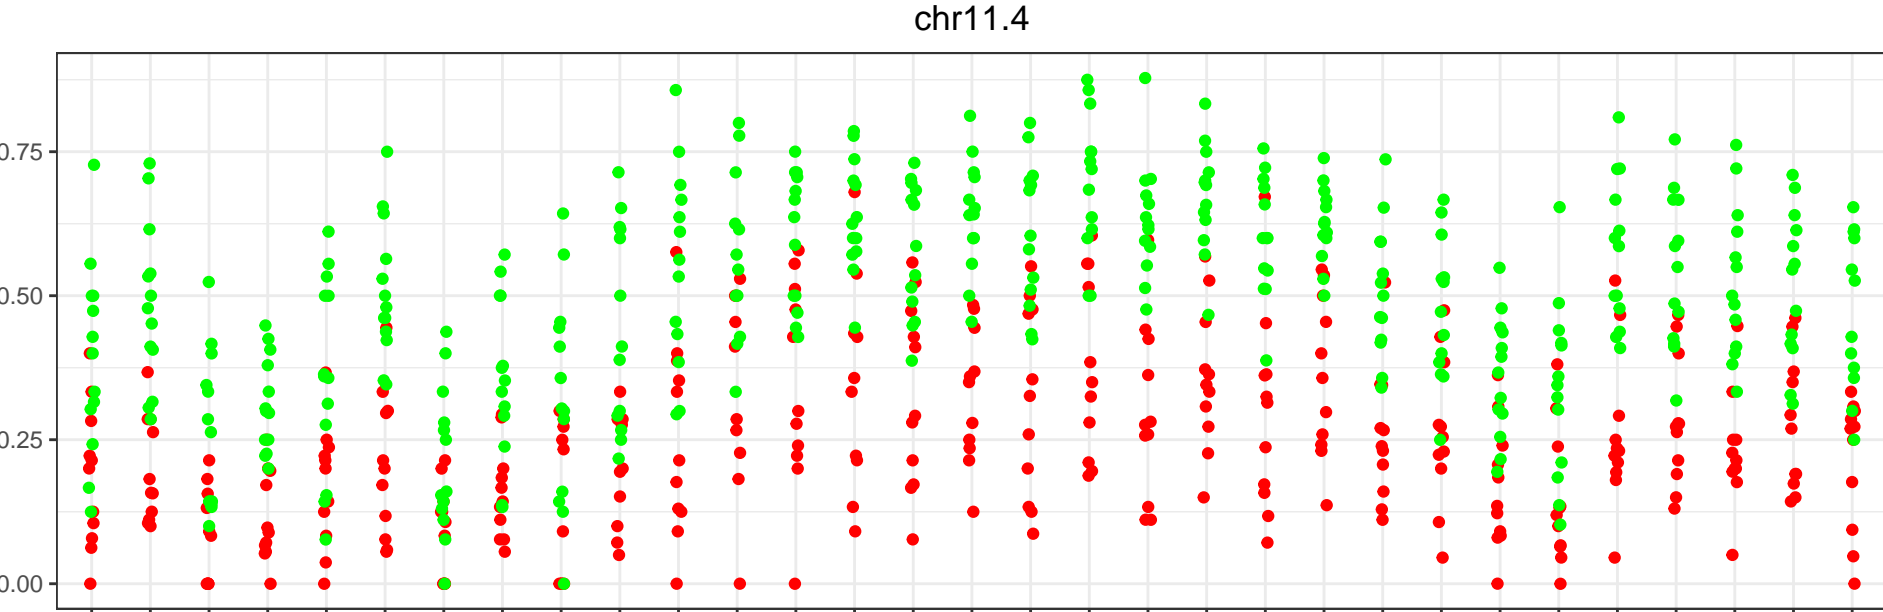

## AC136475.9

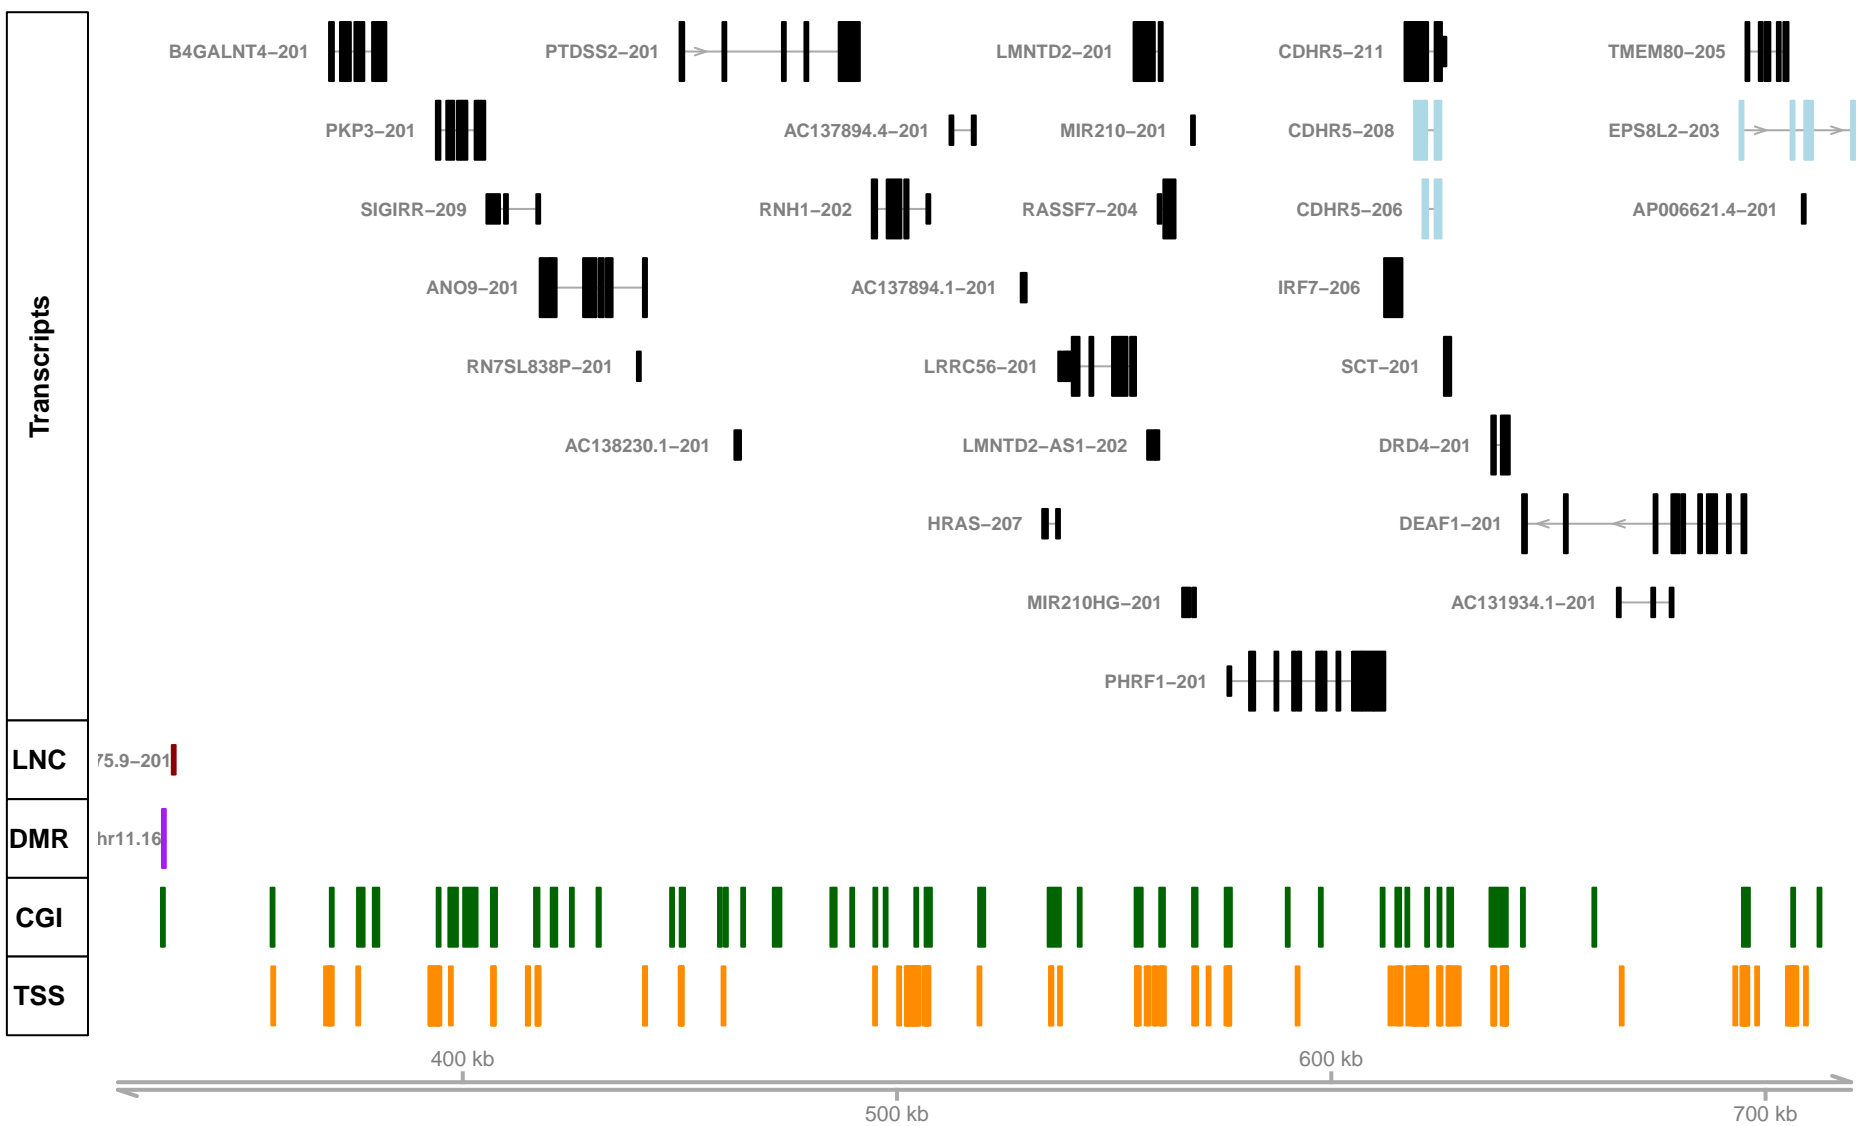

## chr11.16

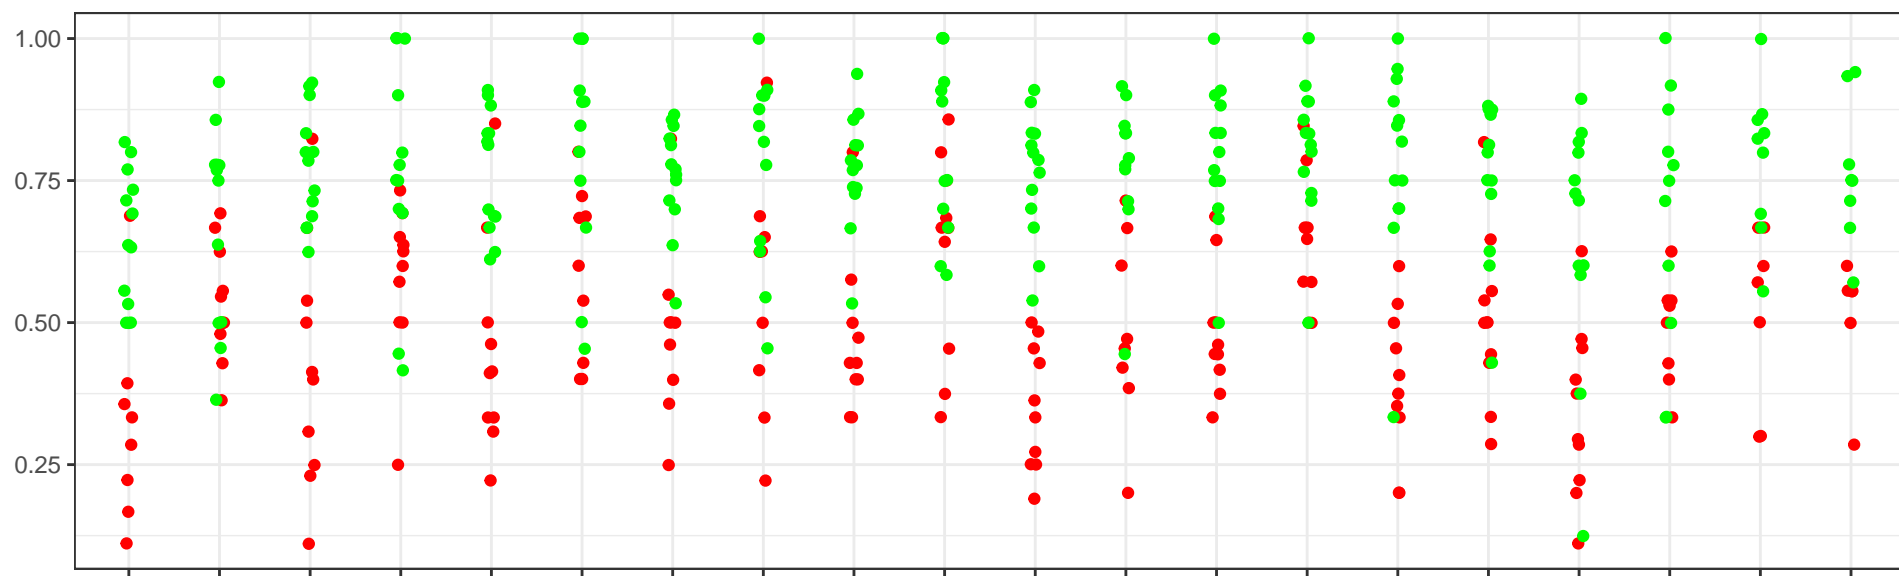

AC144652.1

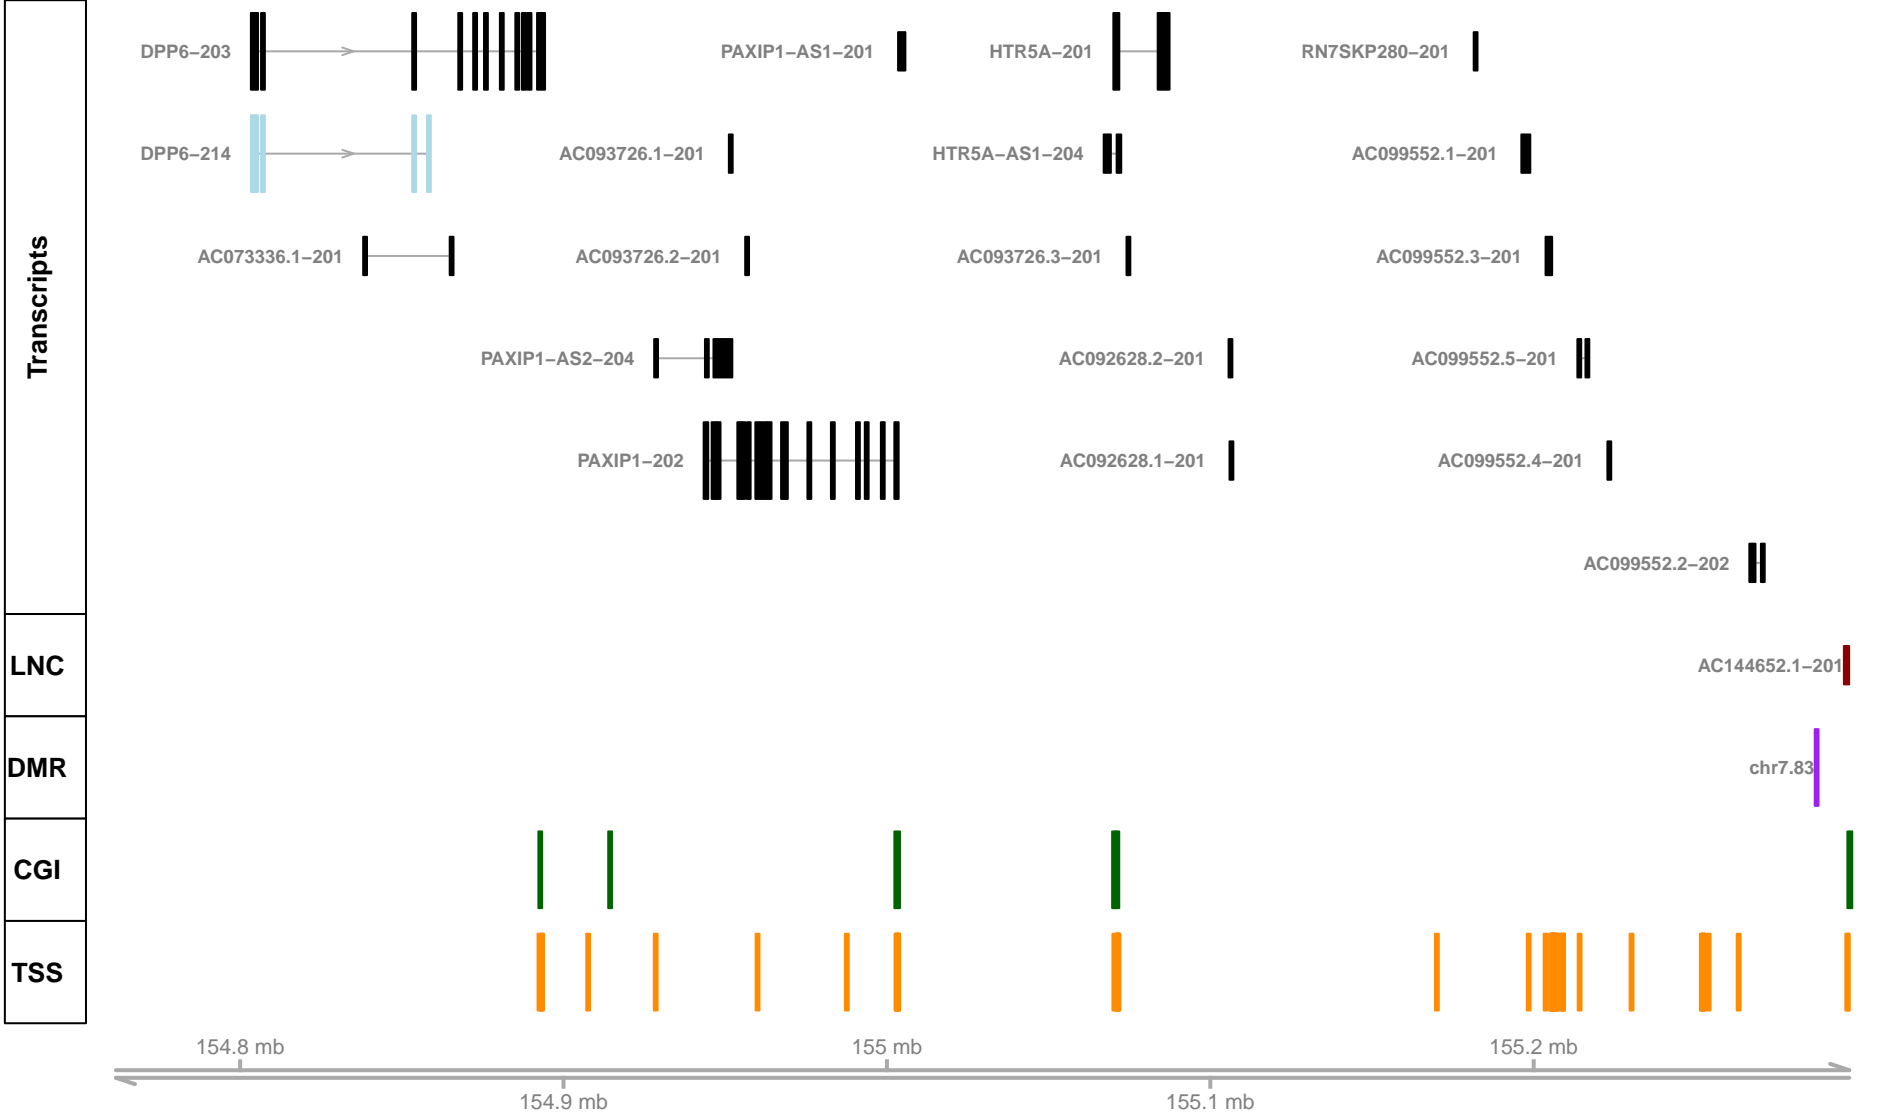

chr7.83

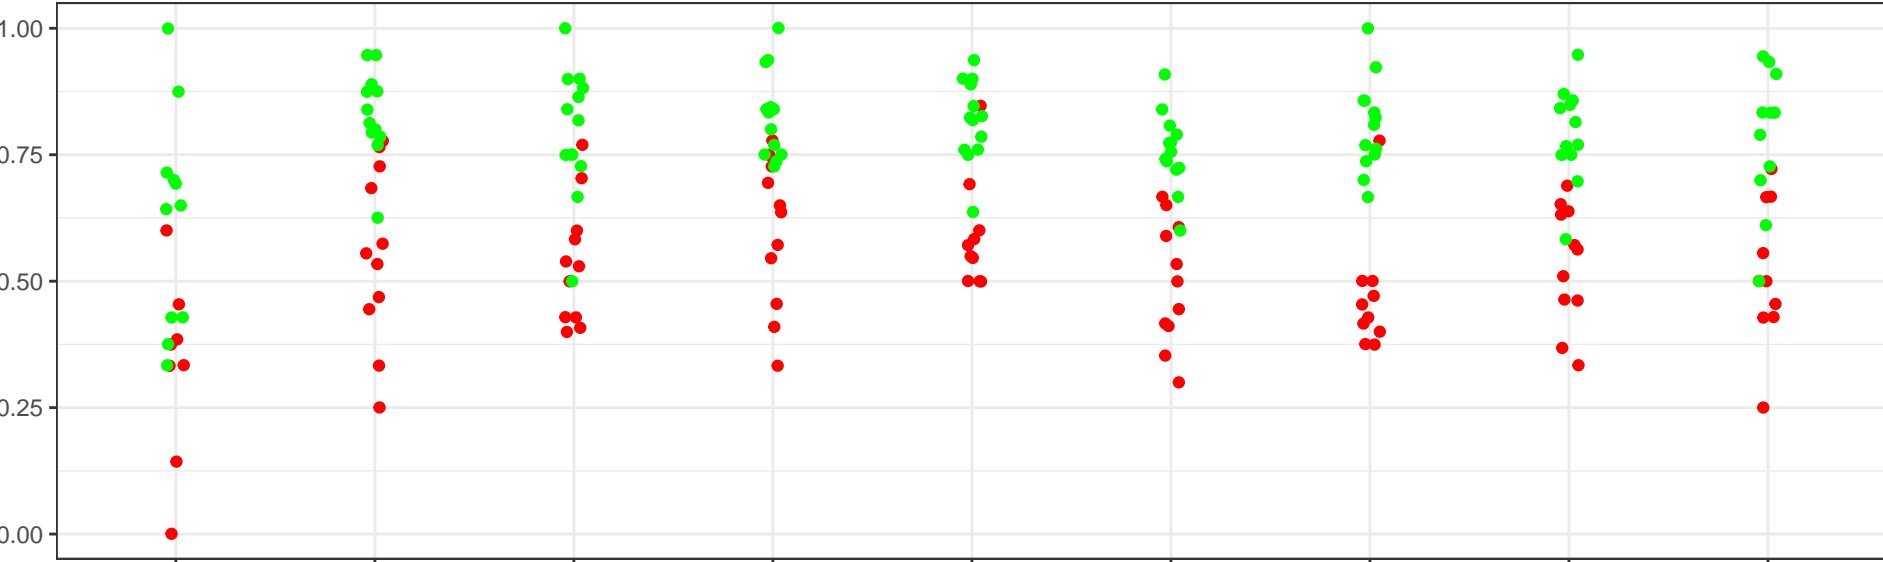

AC145146.1

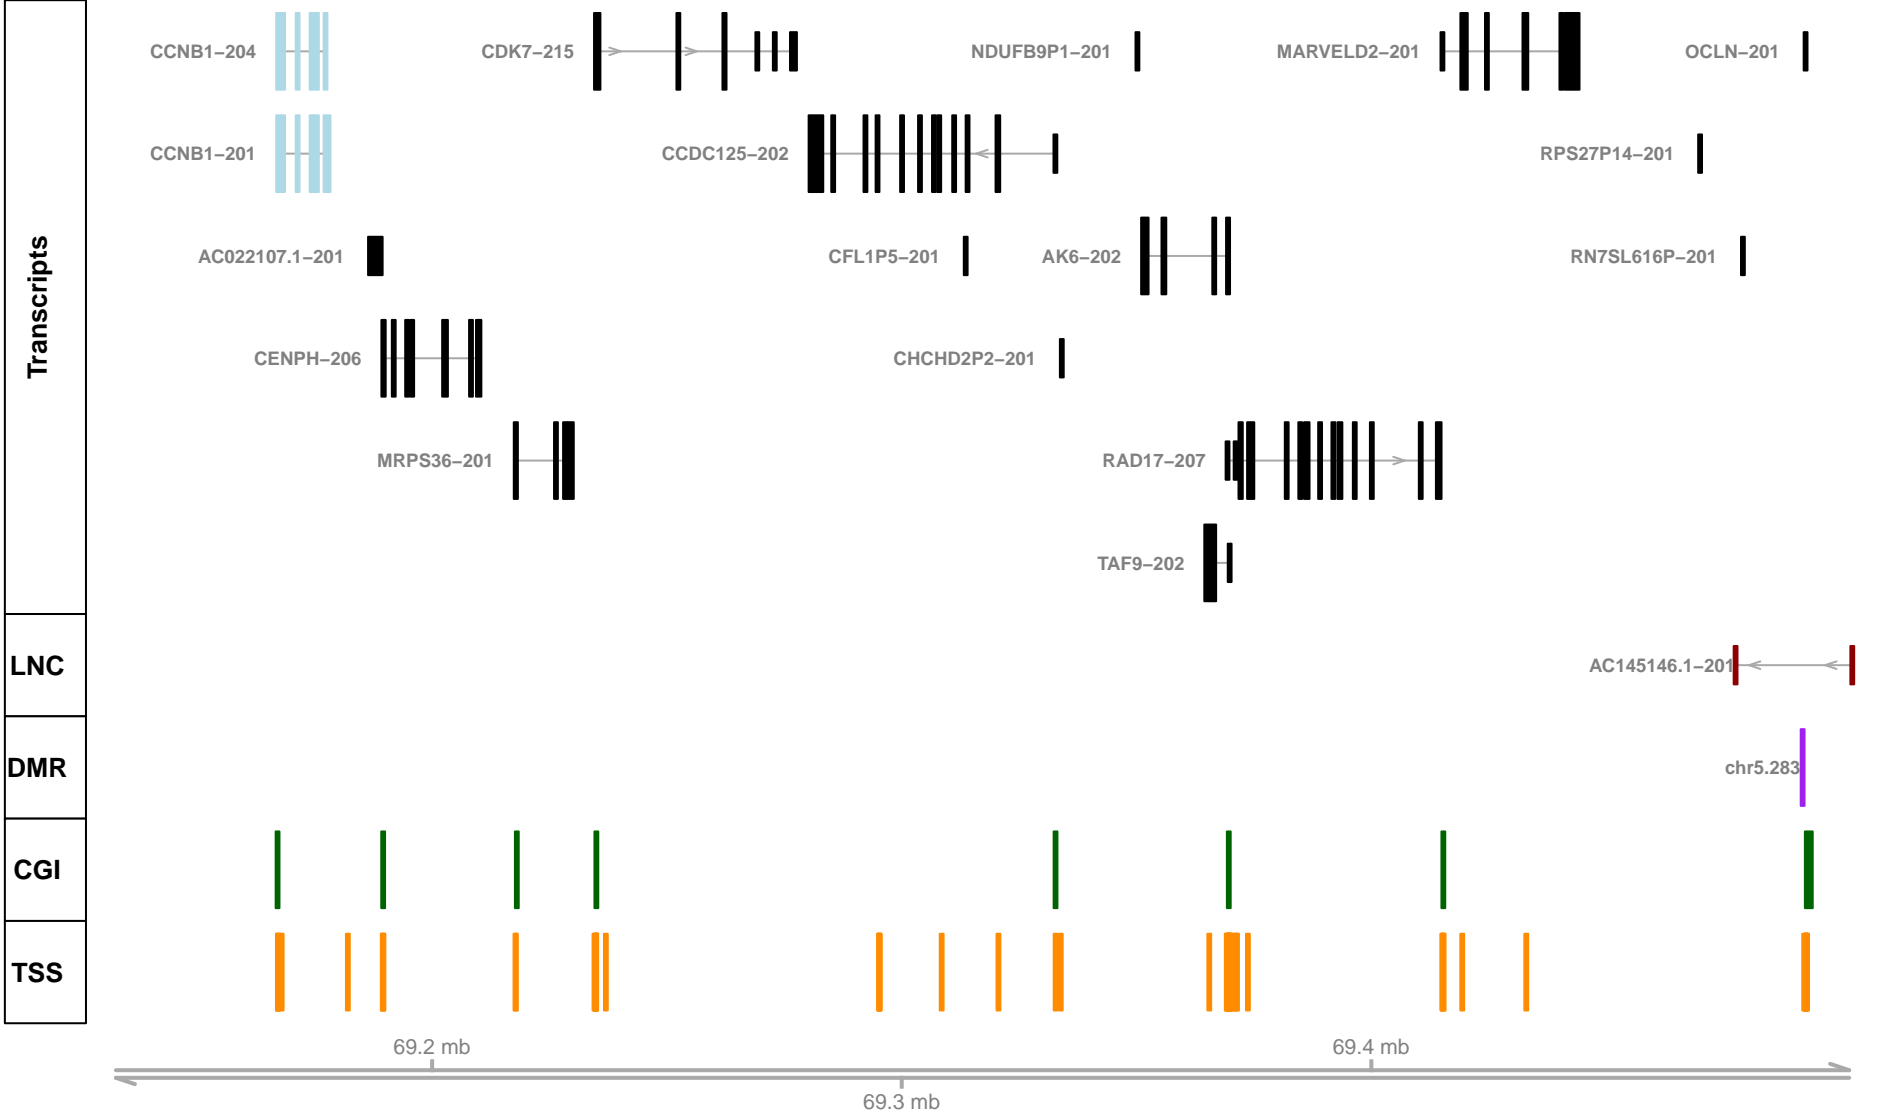

chr5.283

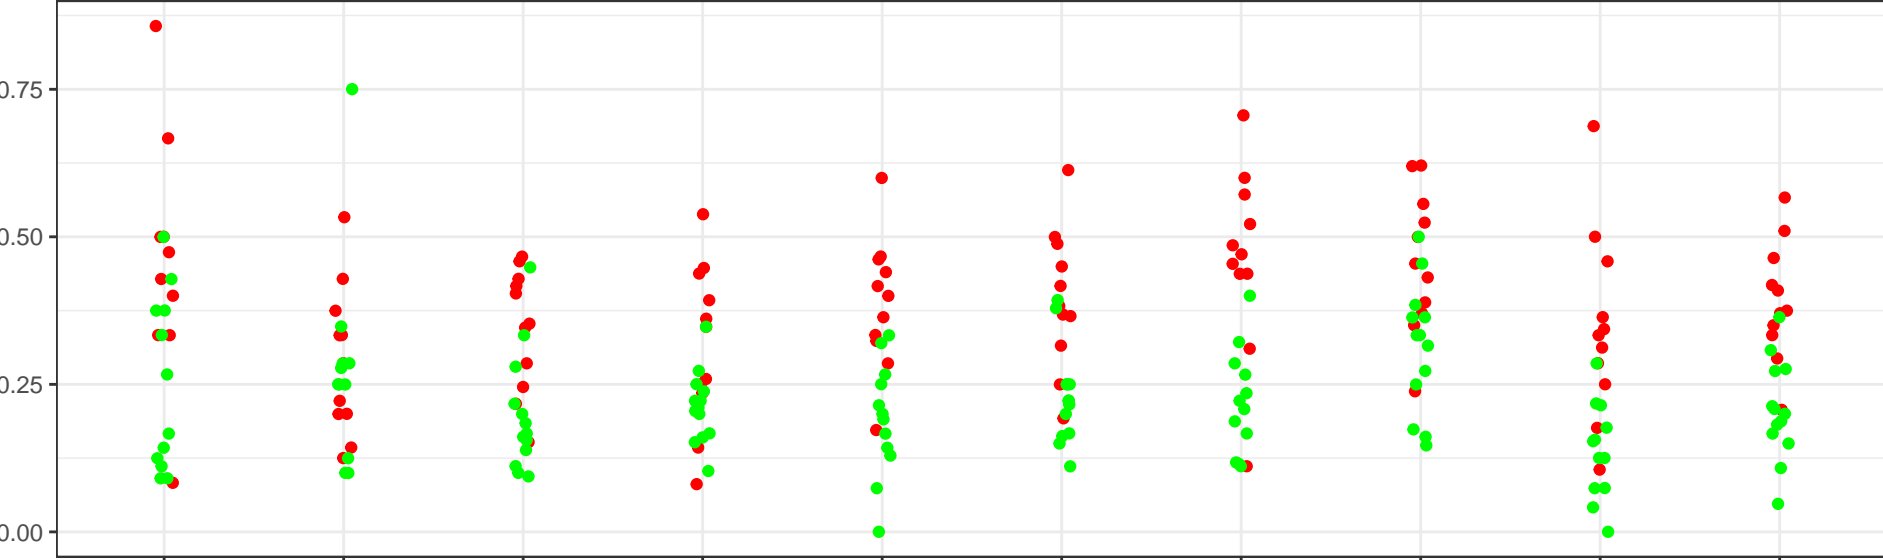

AC243829.4

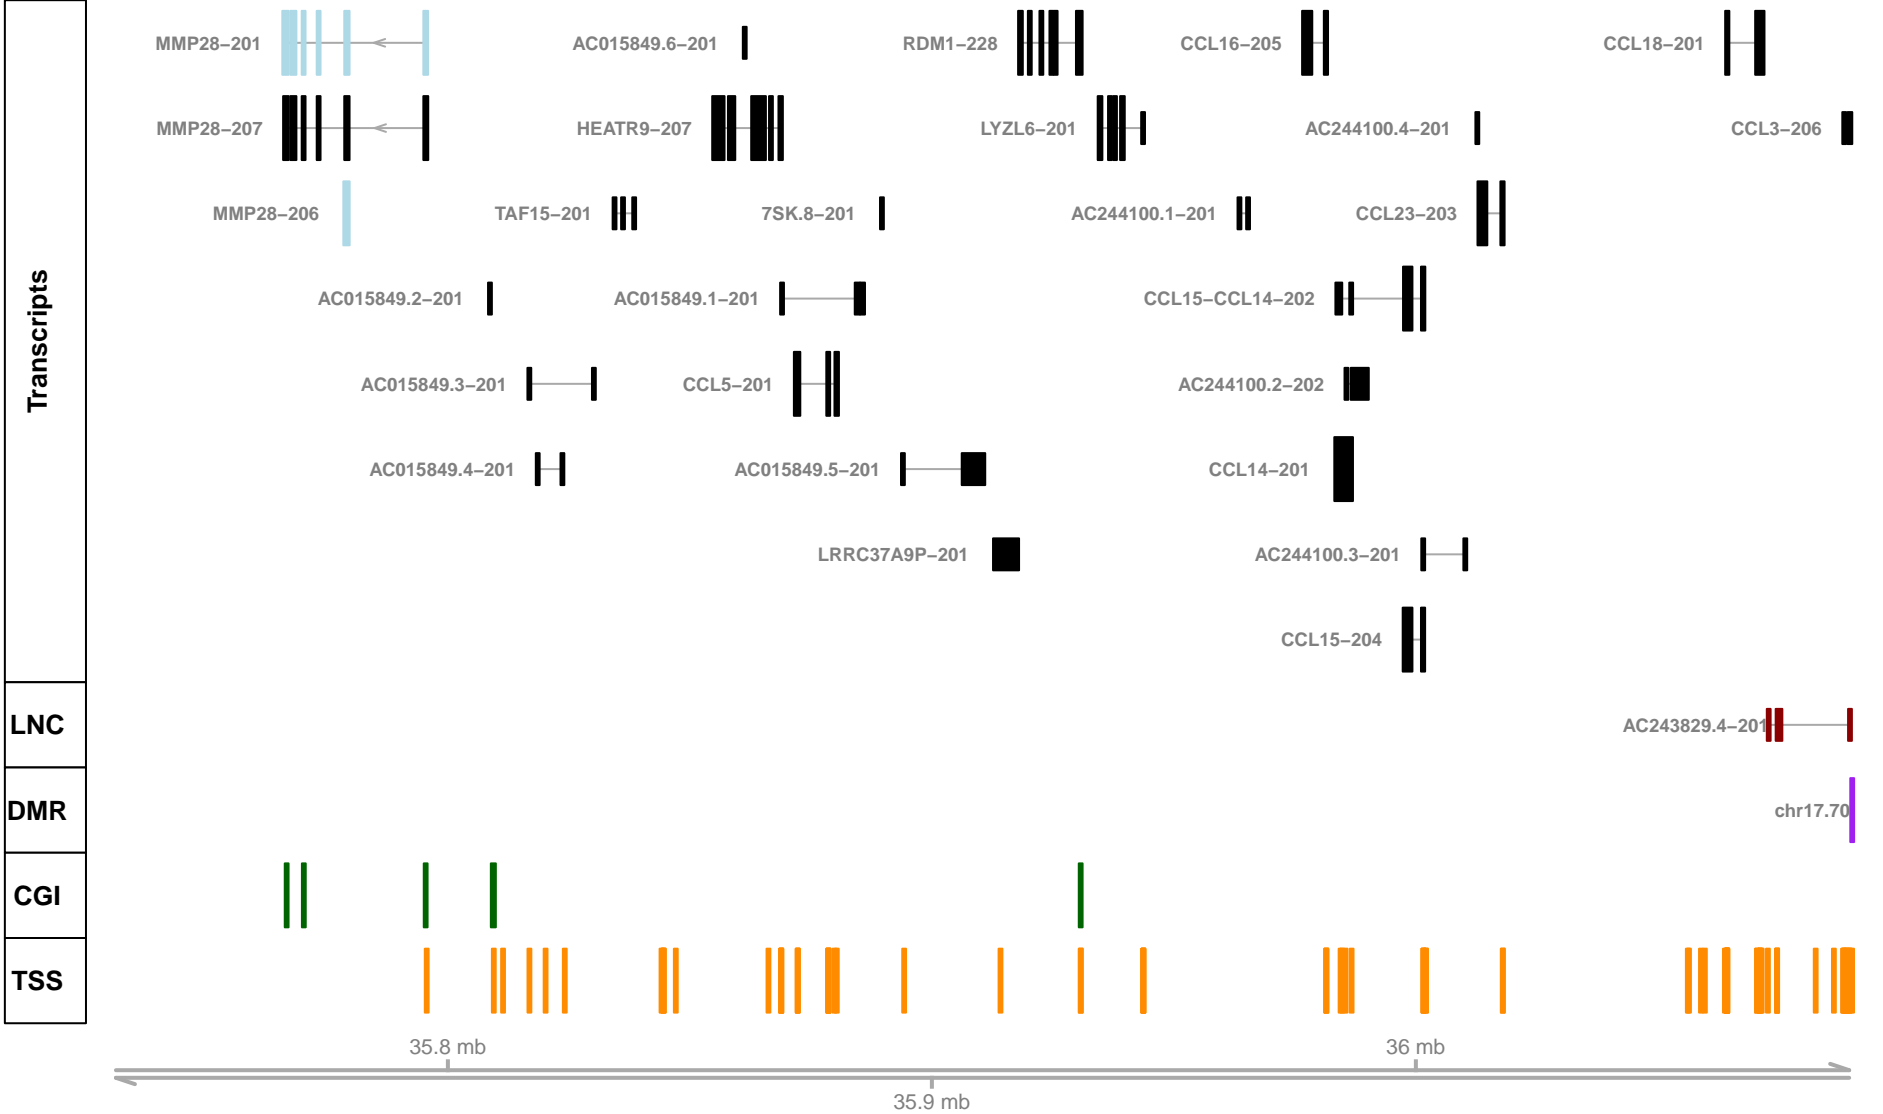

chr17.70

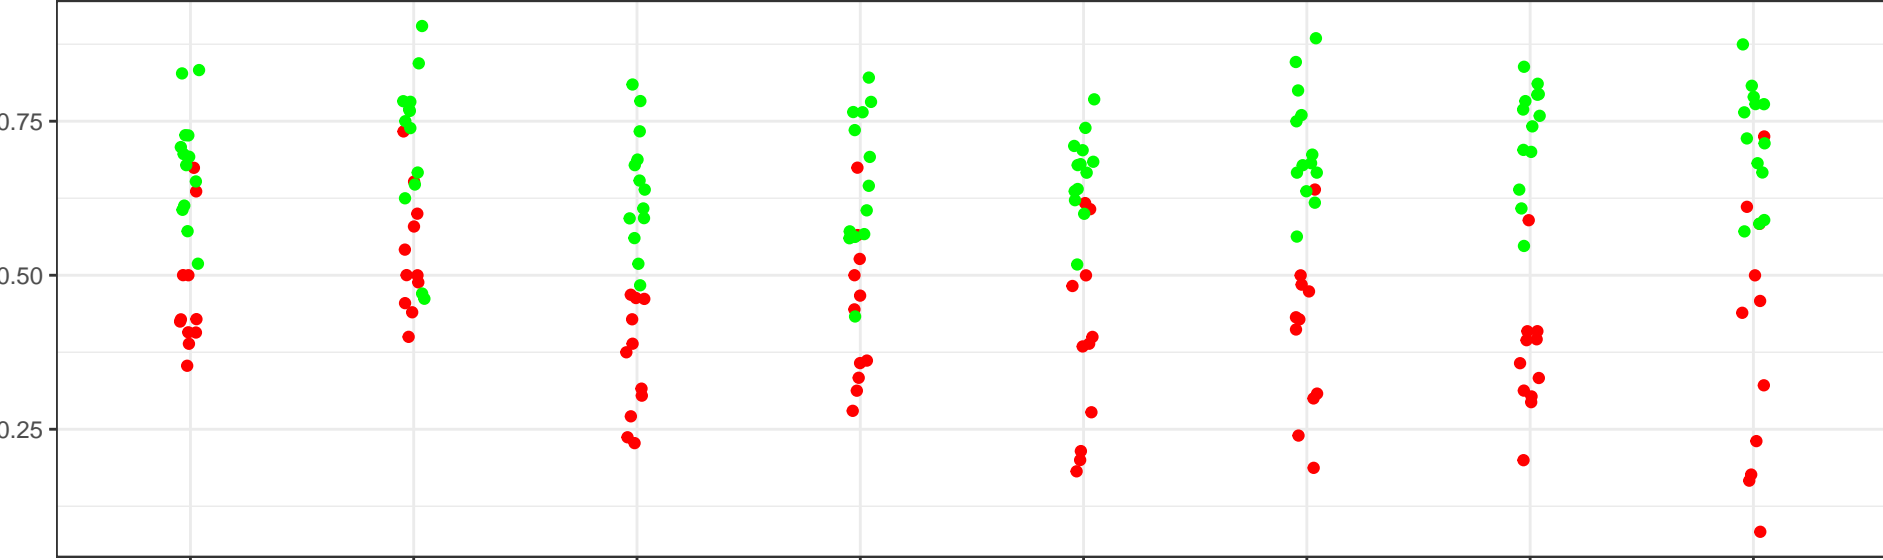

# AC243967.2

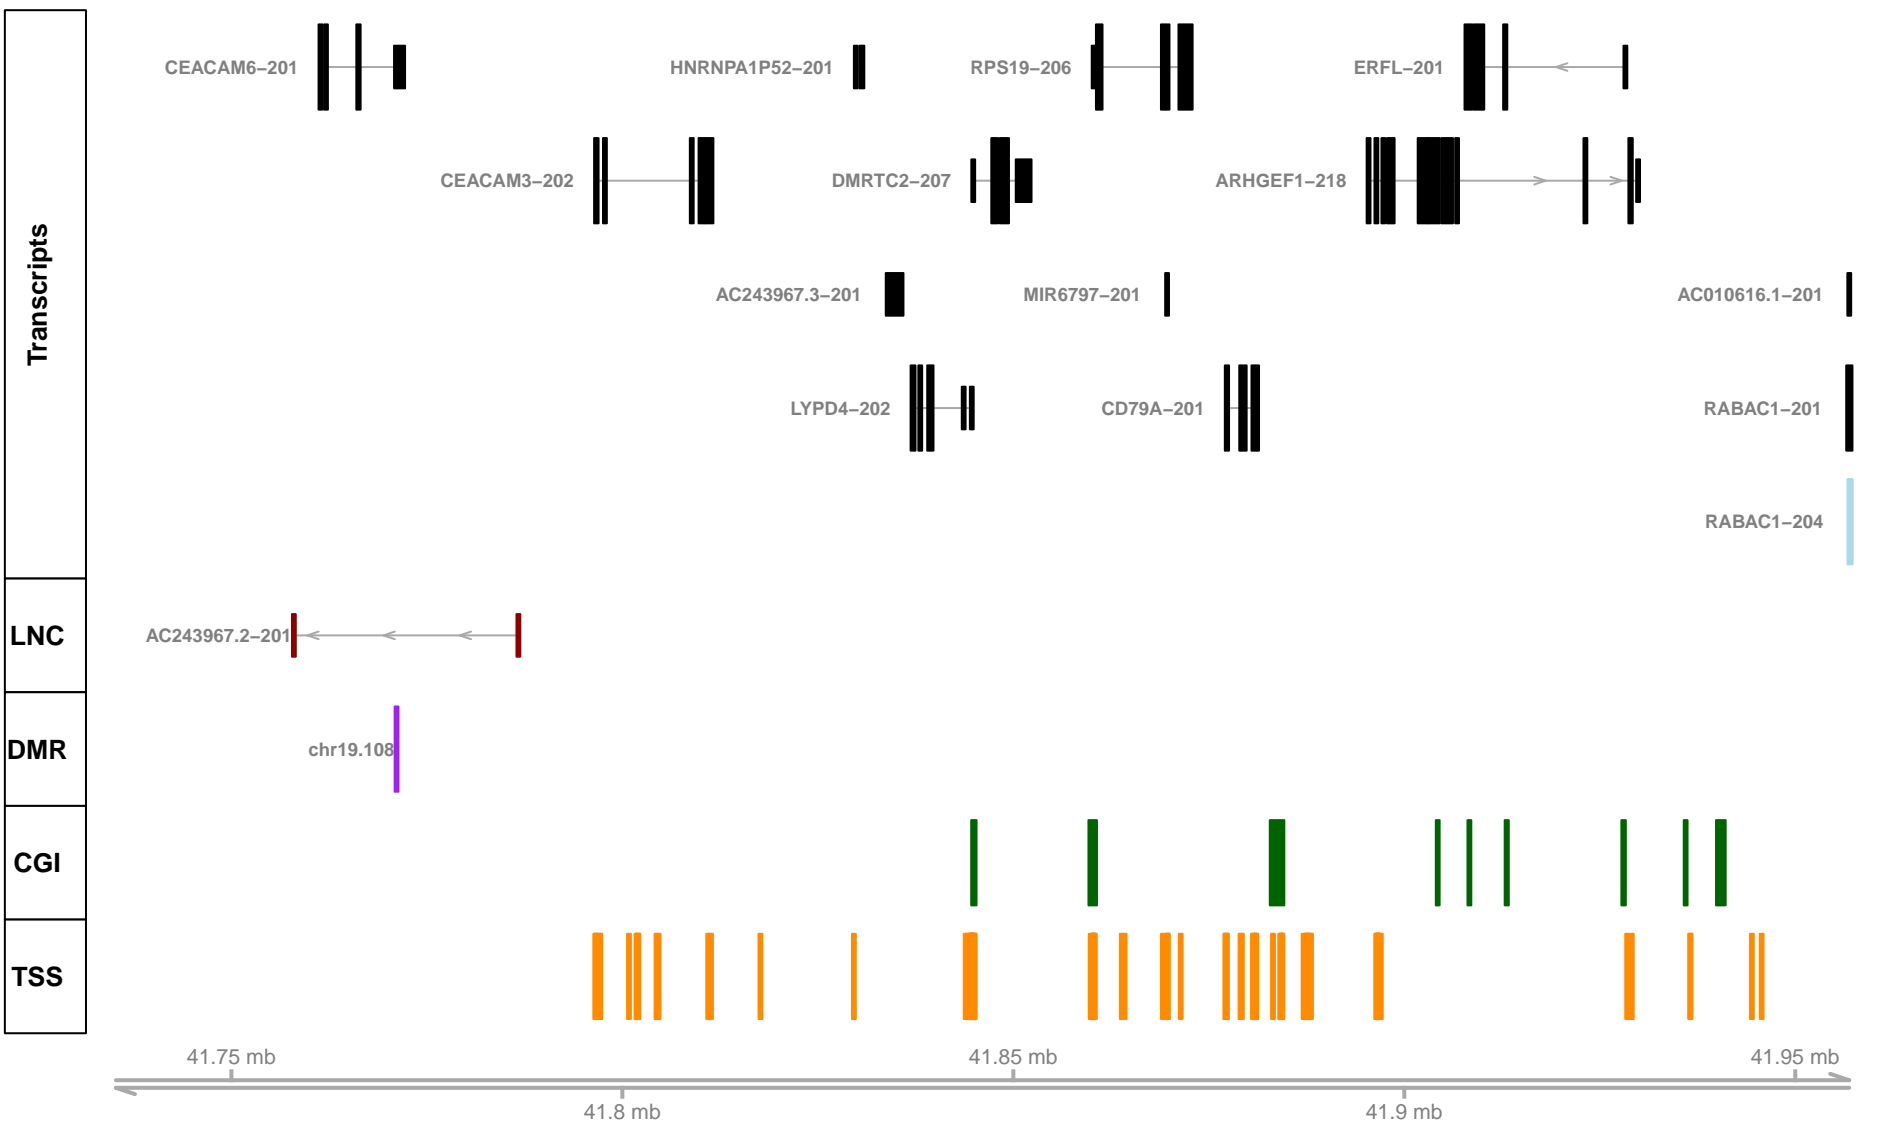

## chr19.108

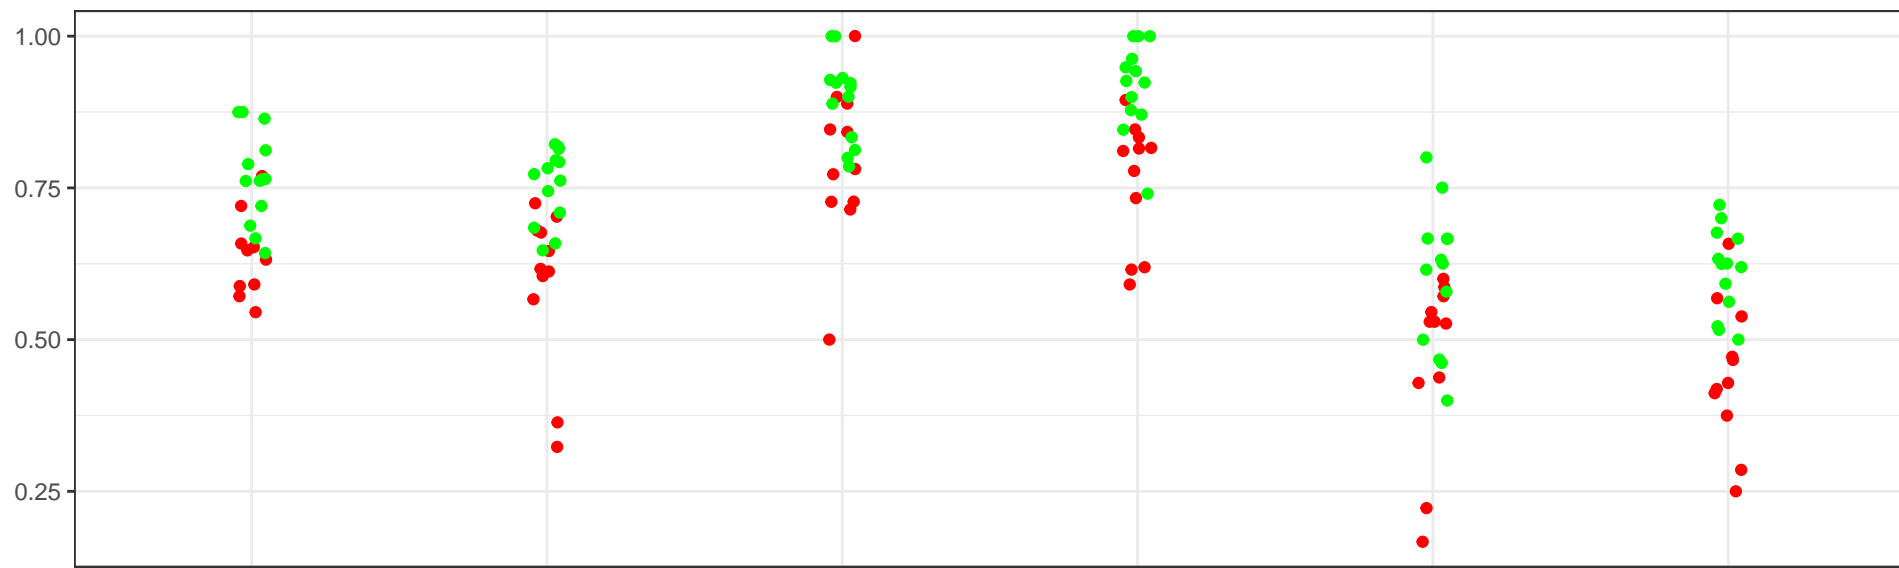

AC244100.2

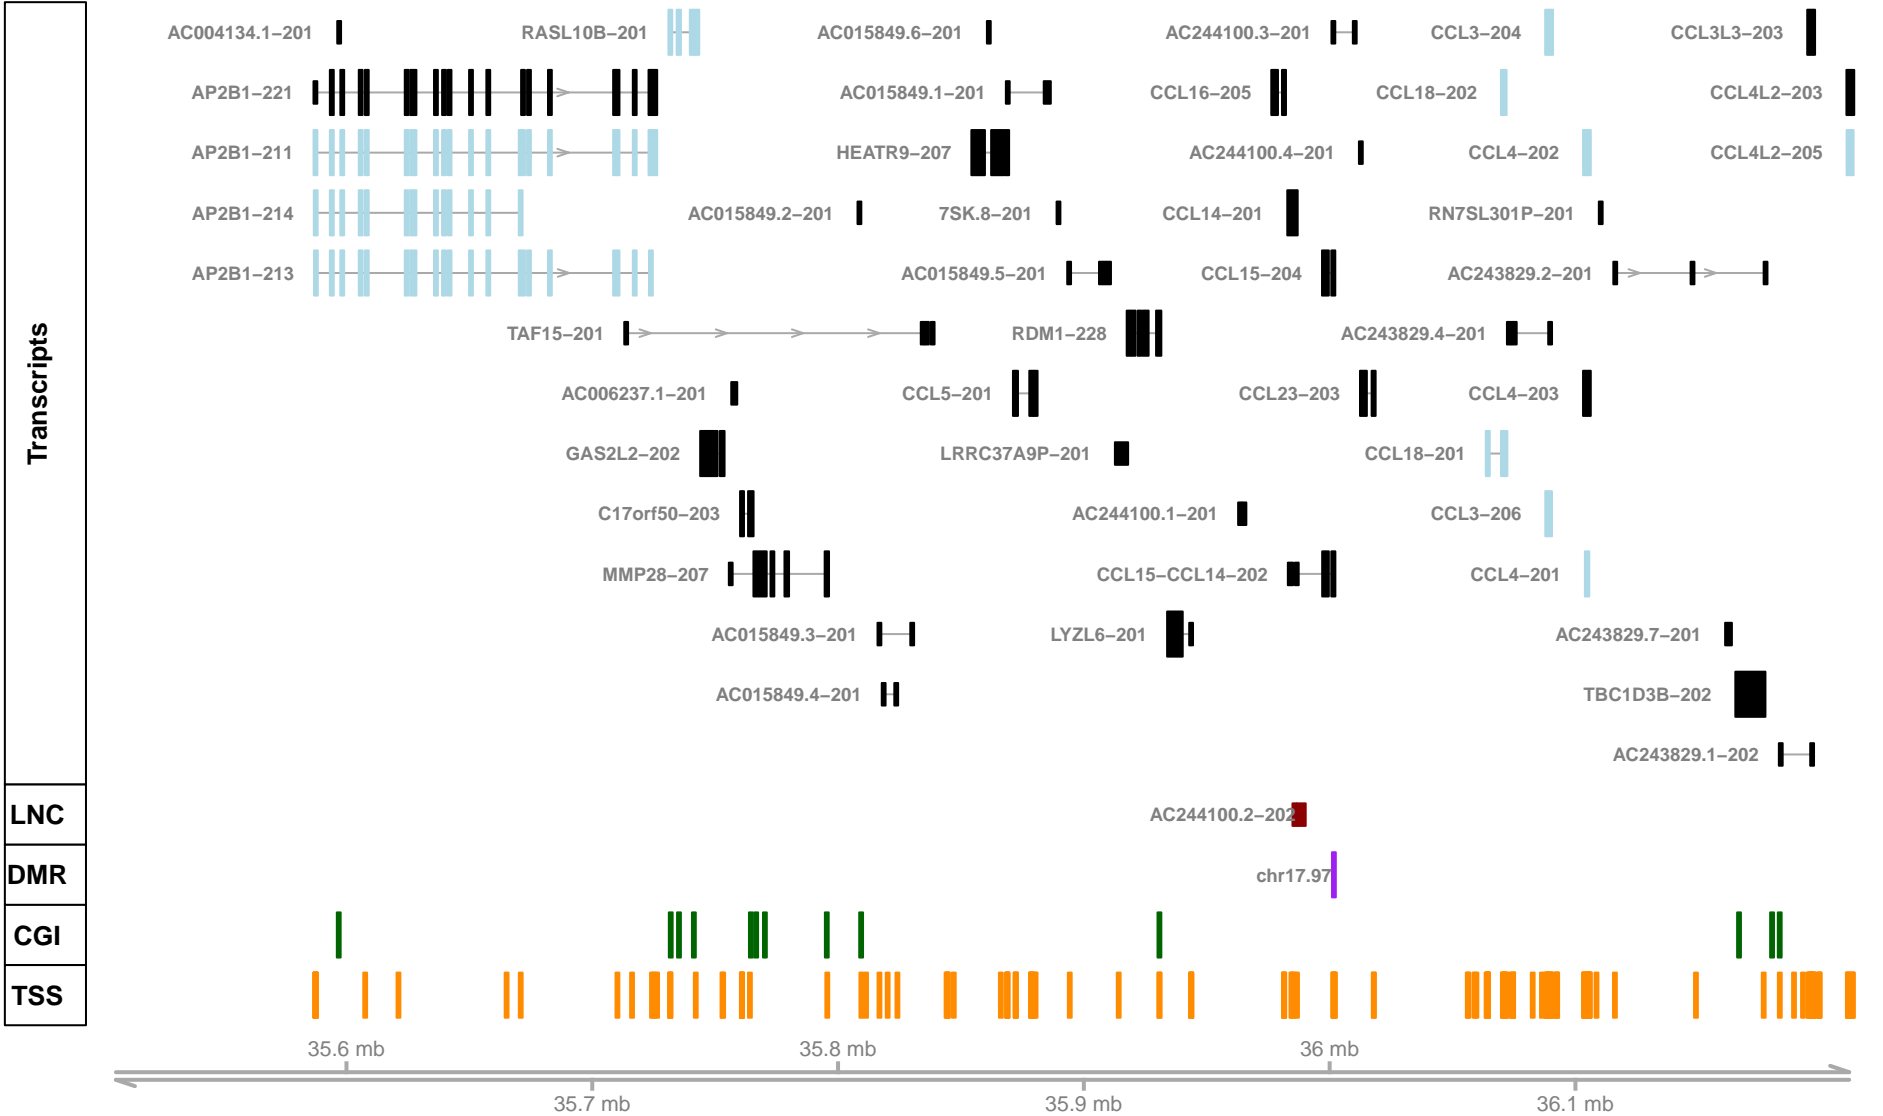

chr17.97

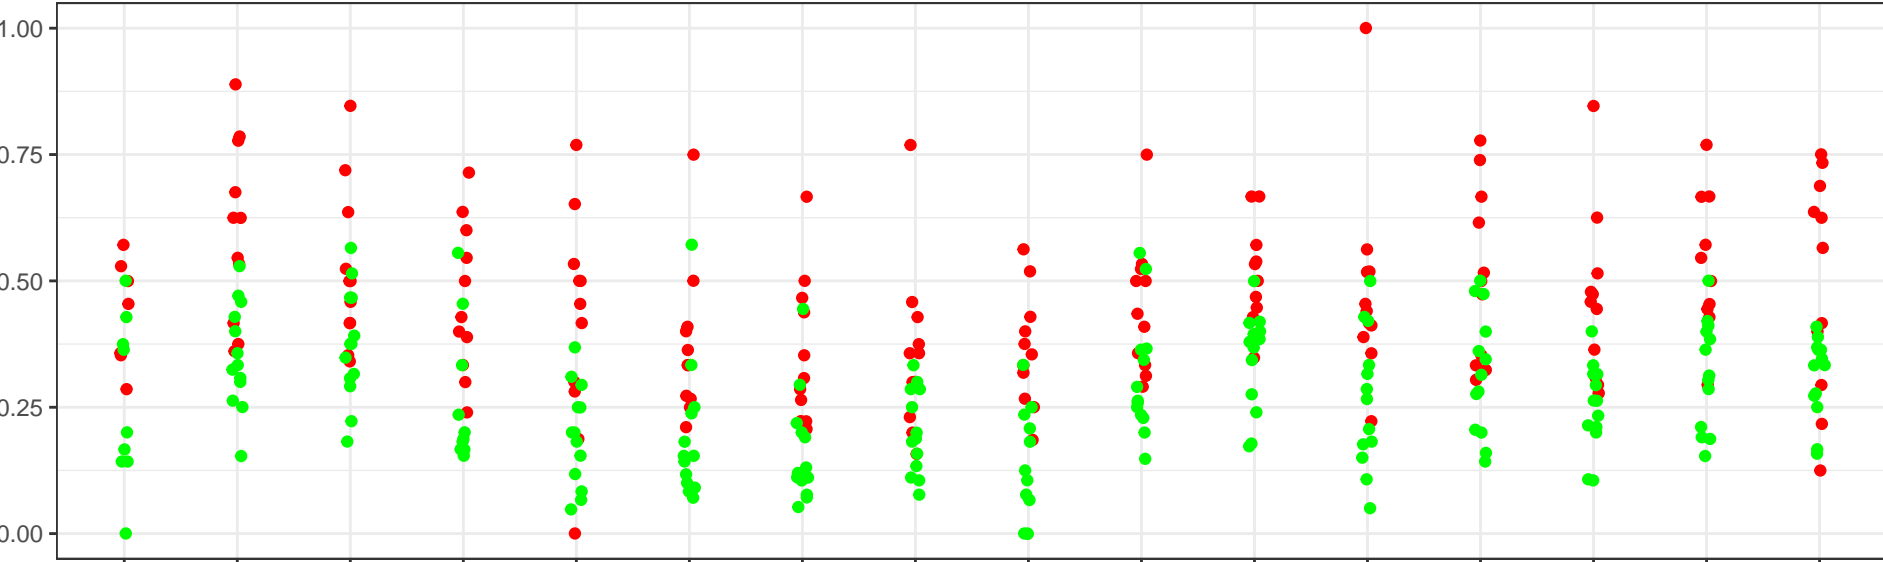

AC244100.3

|             |
|-------------|
| Transcripts |
| LNC         |
| DMR         |
| CGI         |
| TSS         |

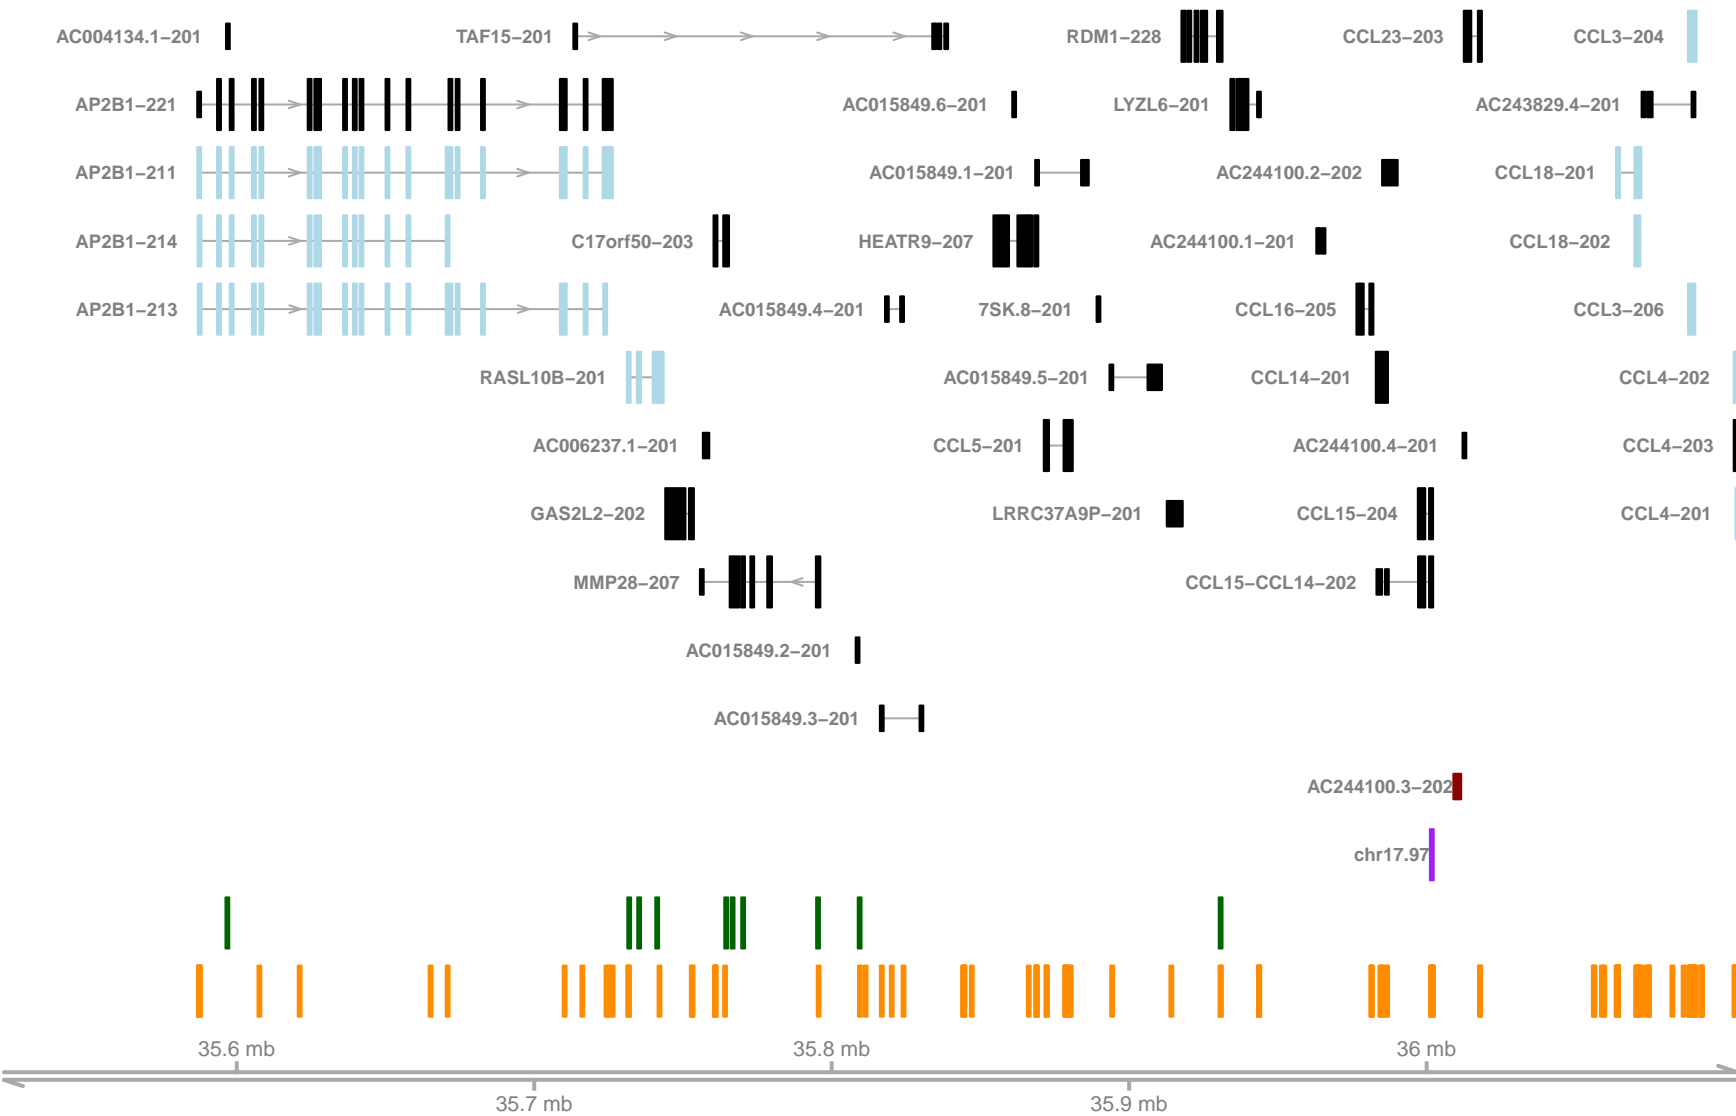

chr17.97

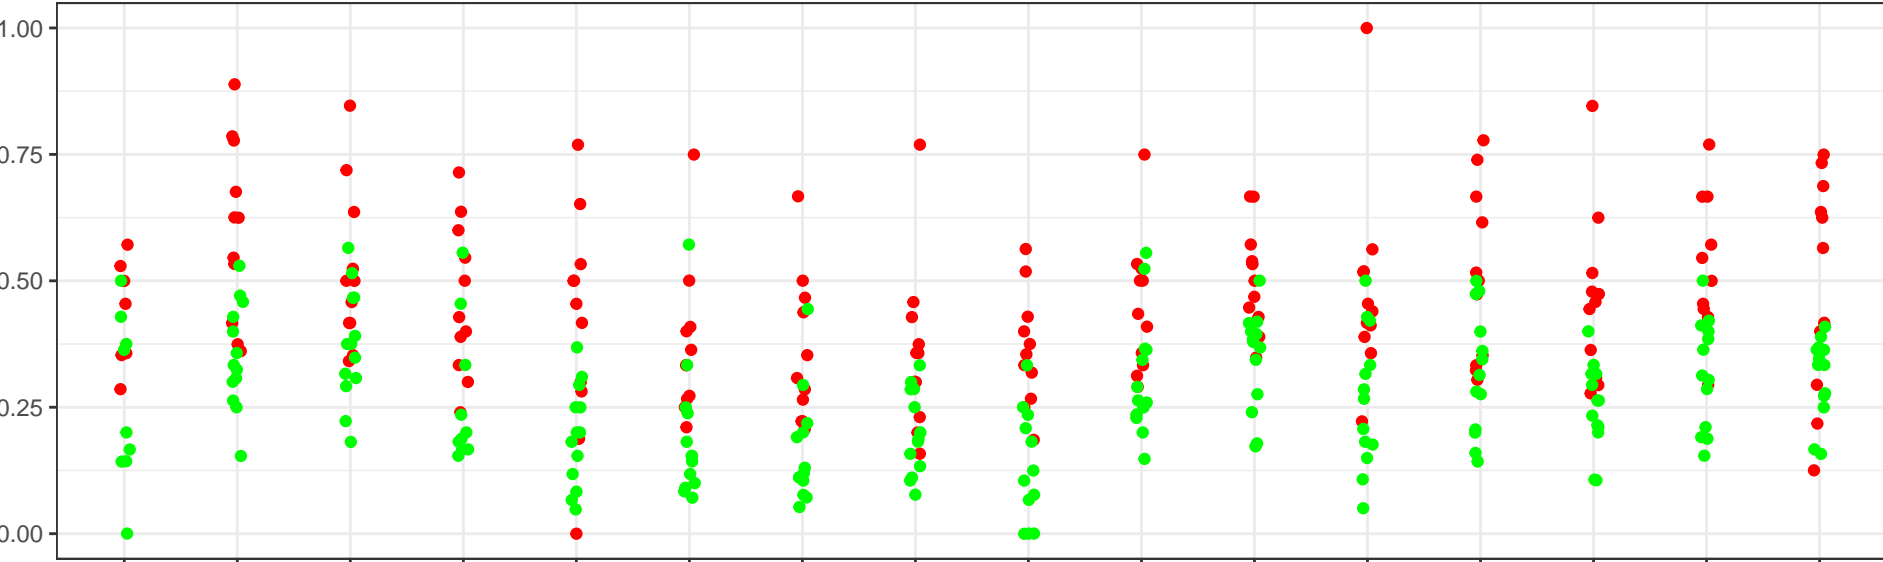

# ADD3-AS1

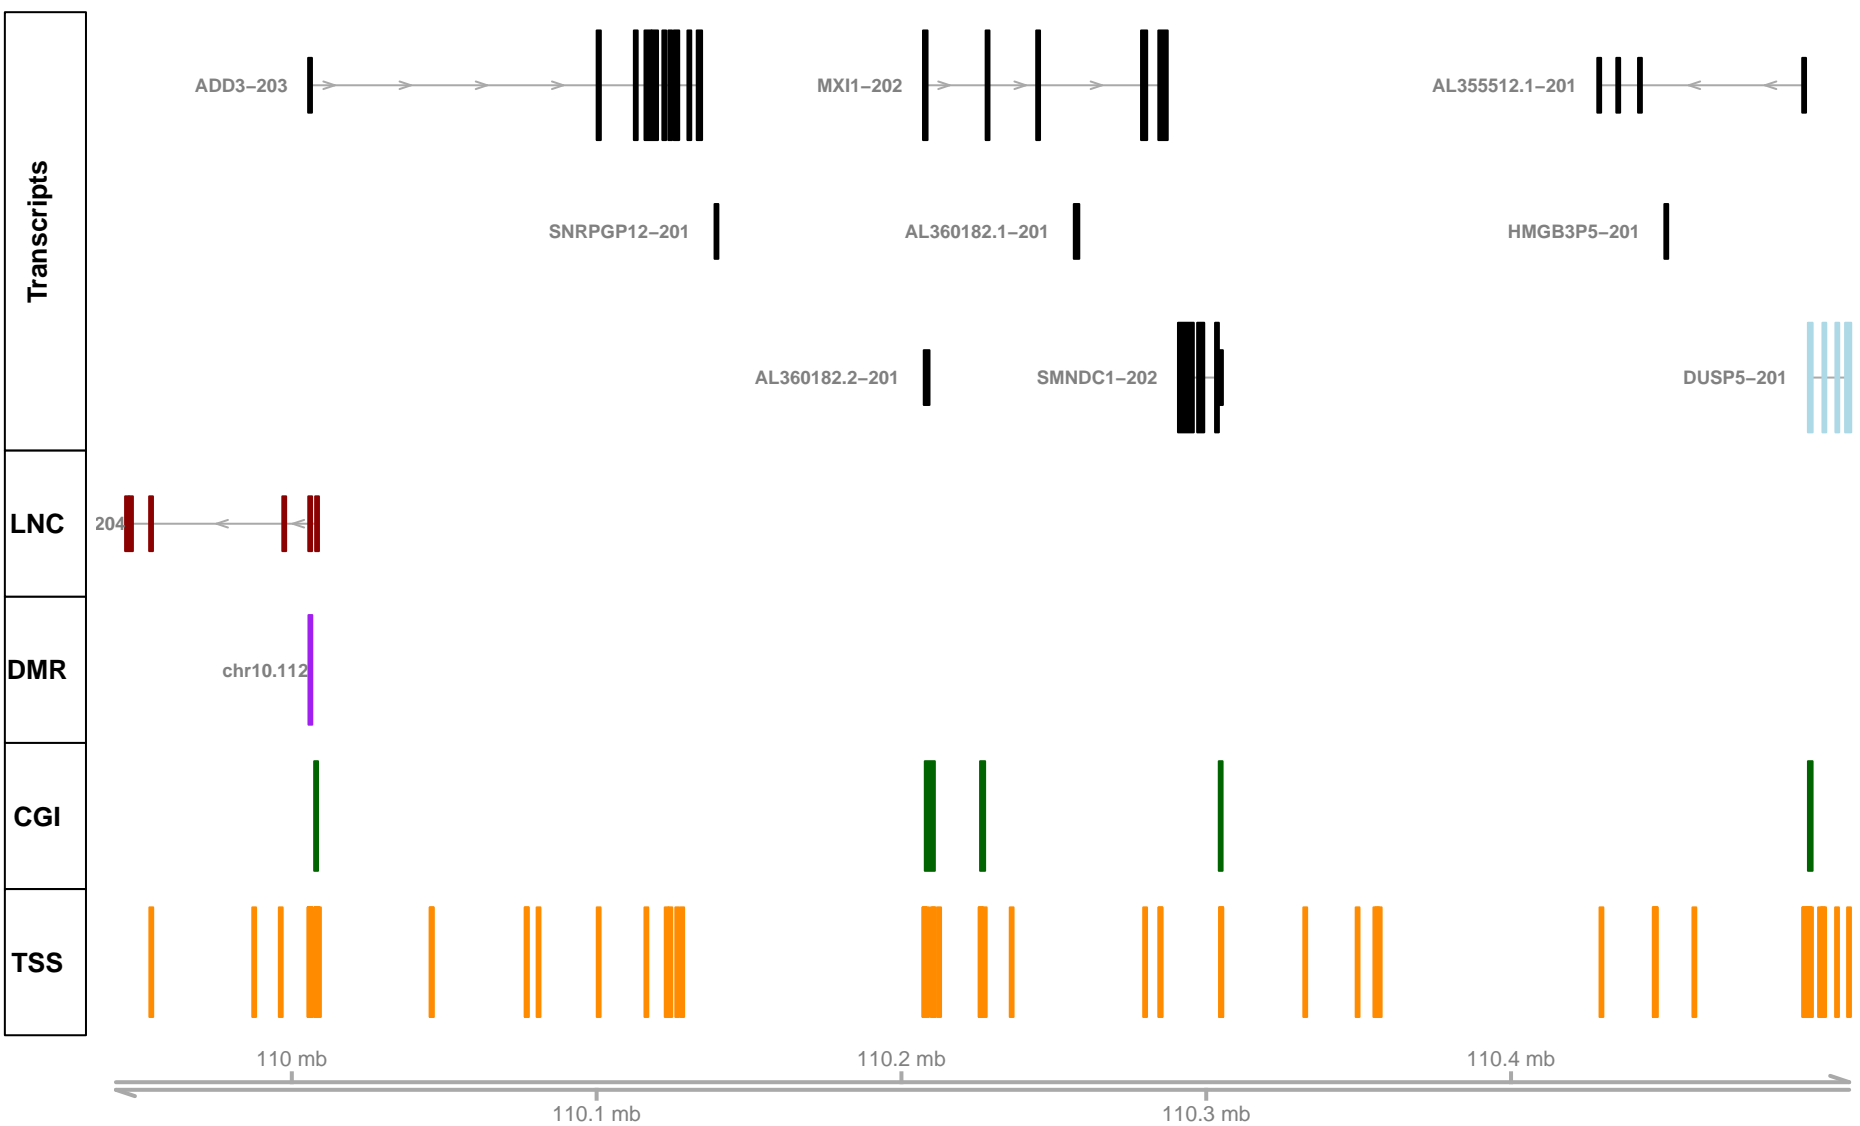

## chr10.112

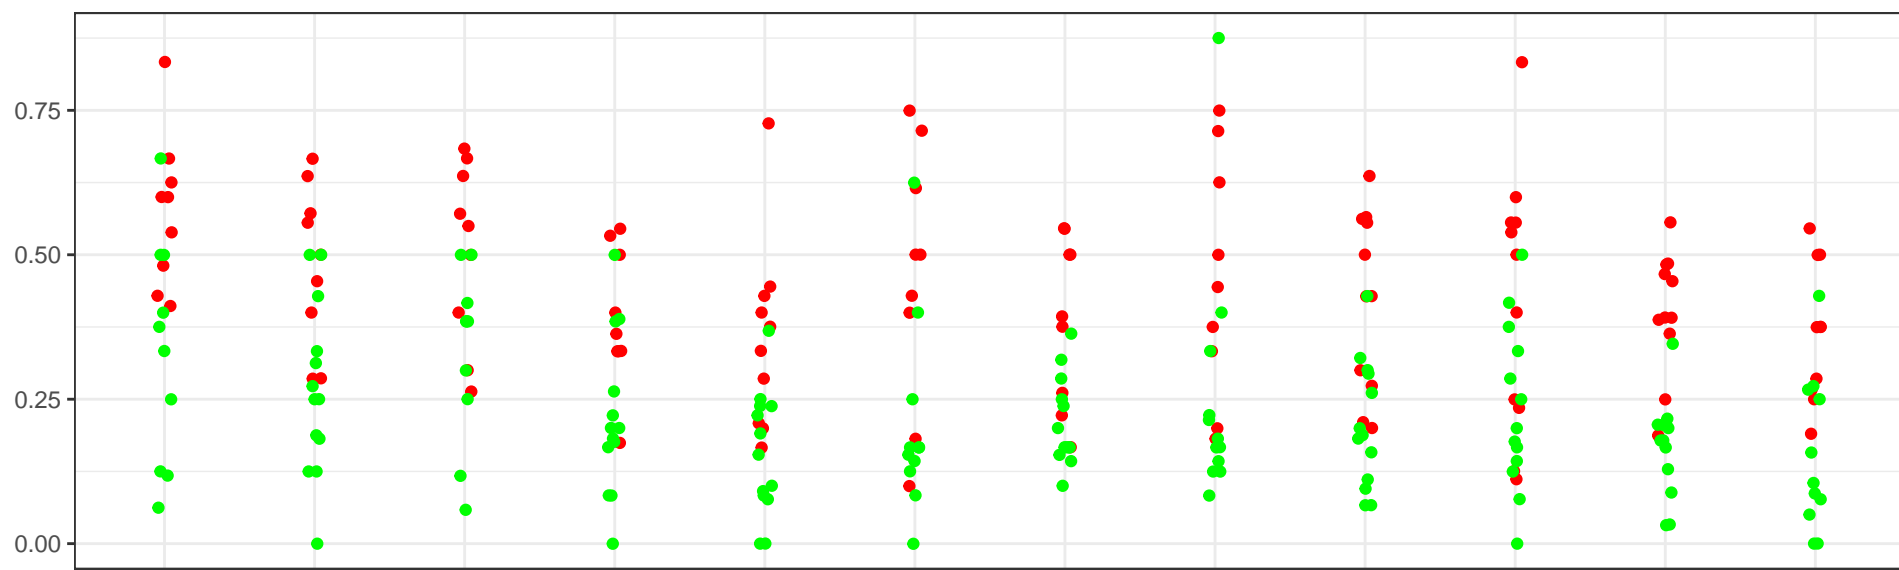

ADORA2A-AS1

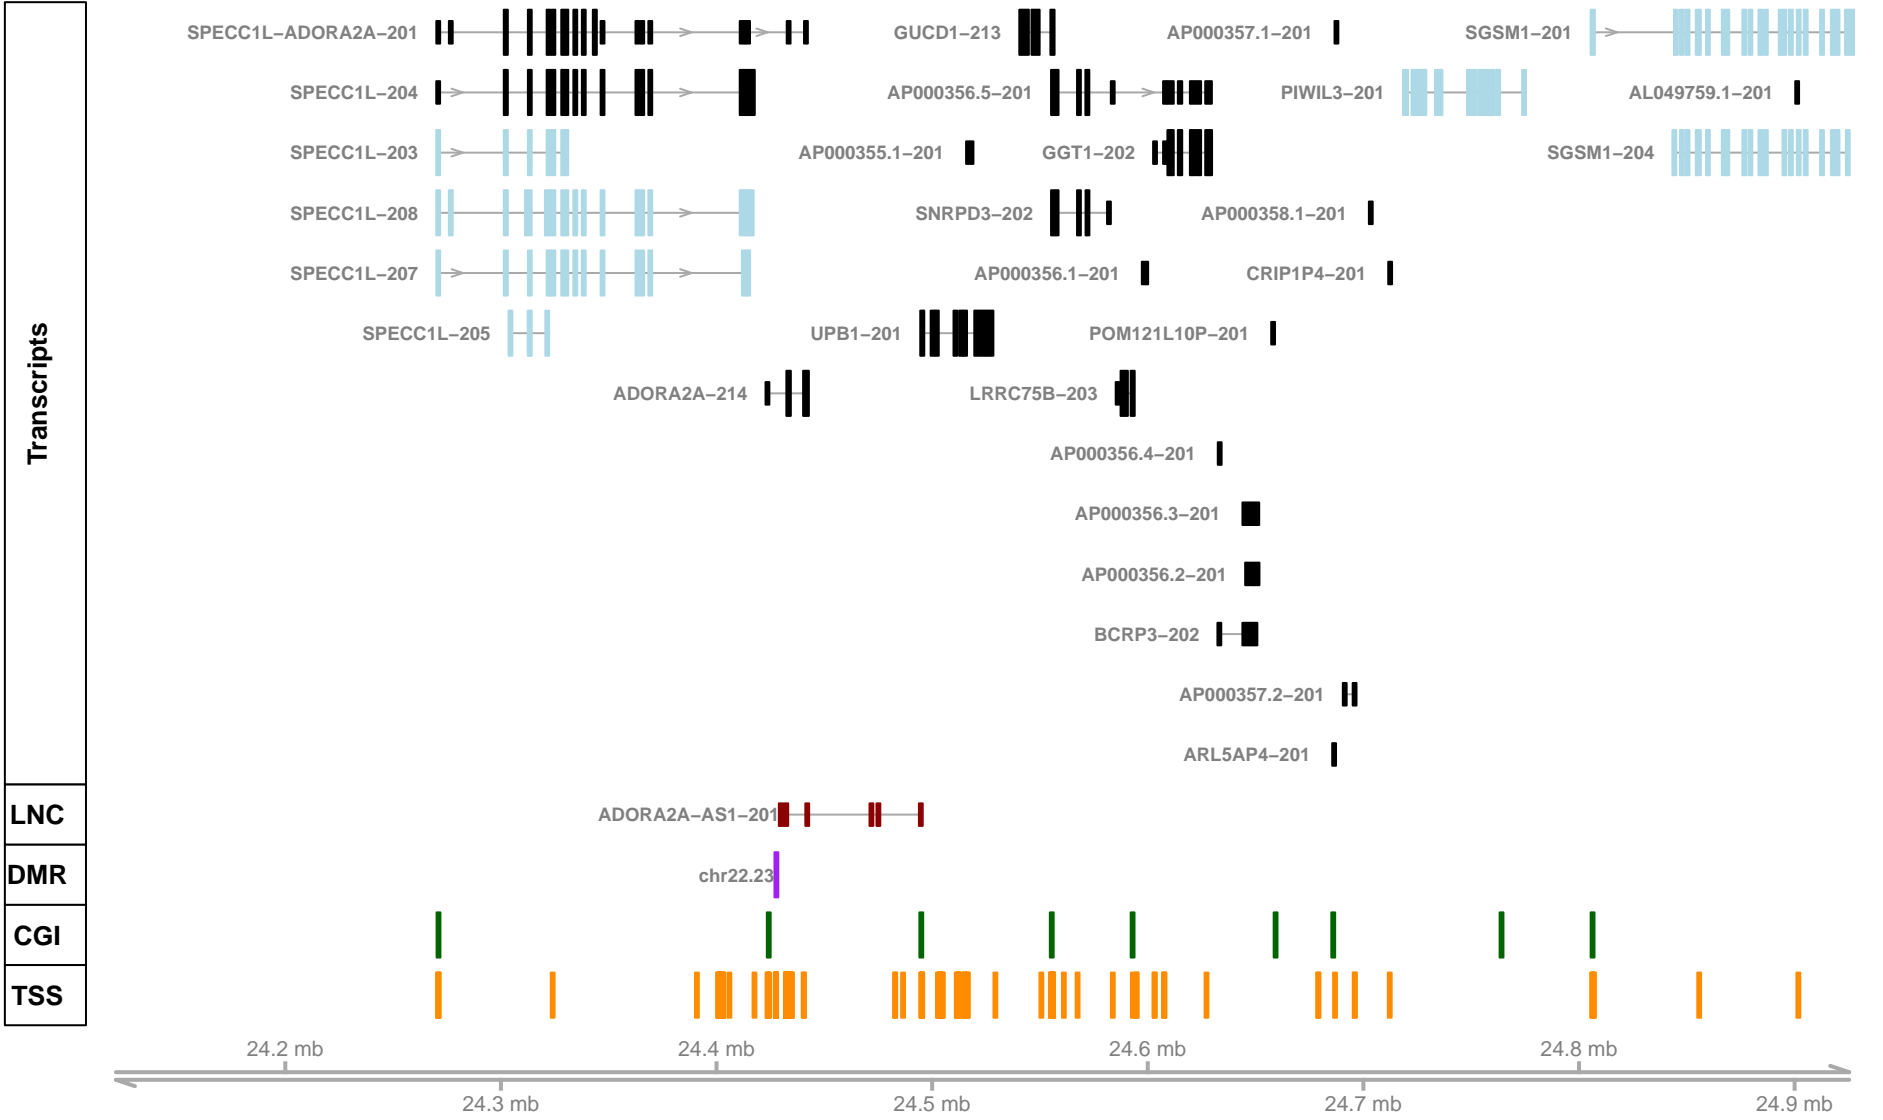

chr22.23

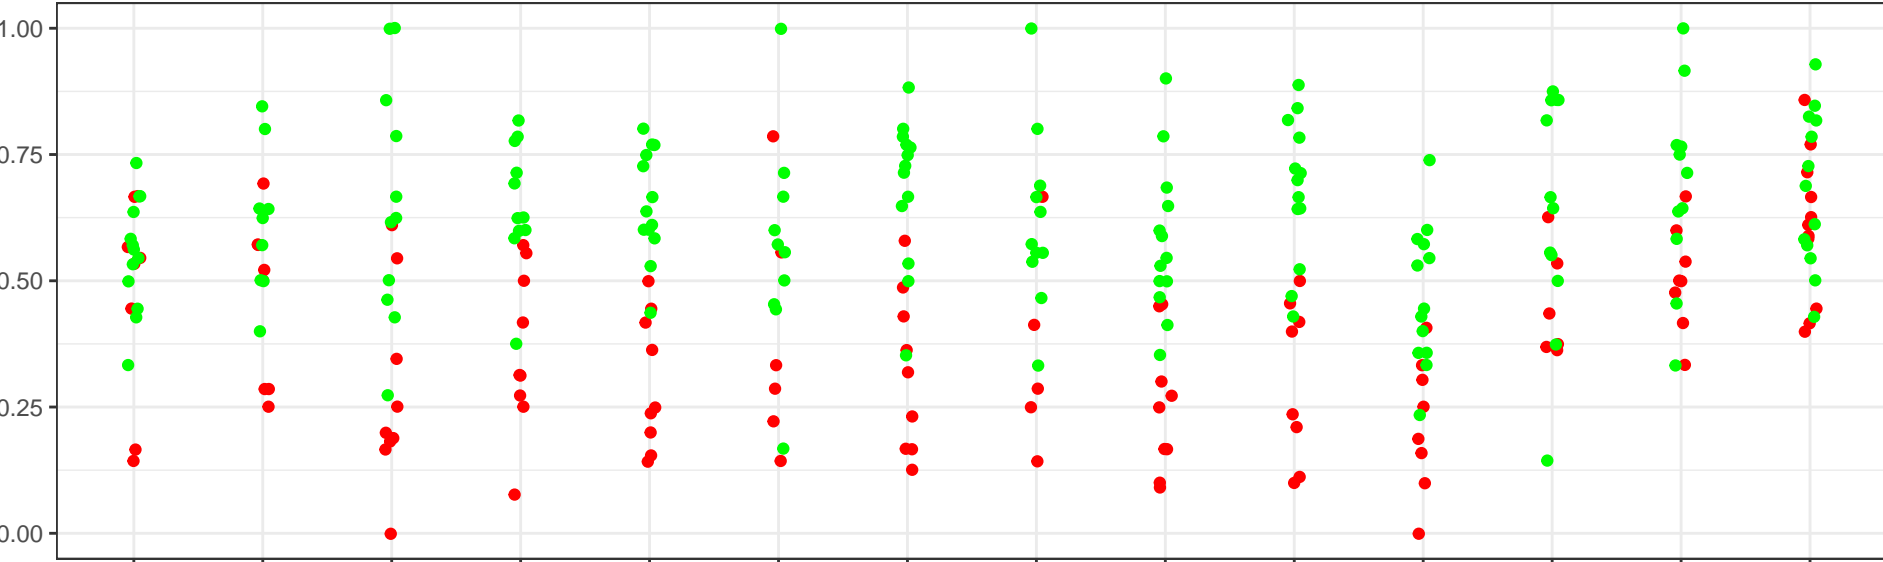

# AGAP2-AS1

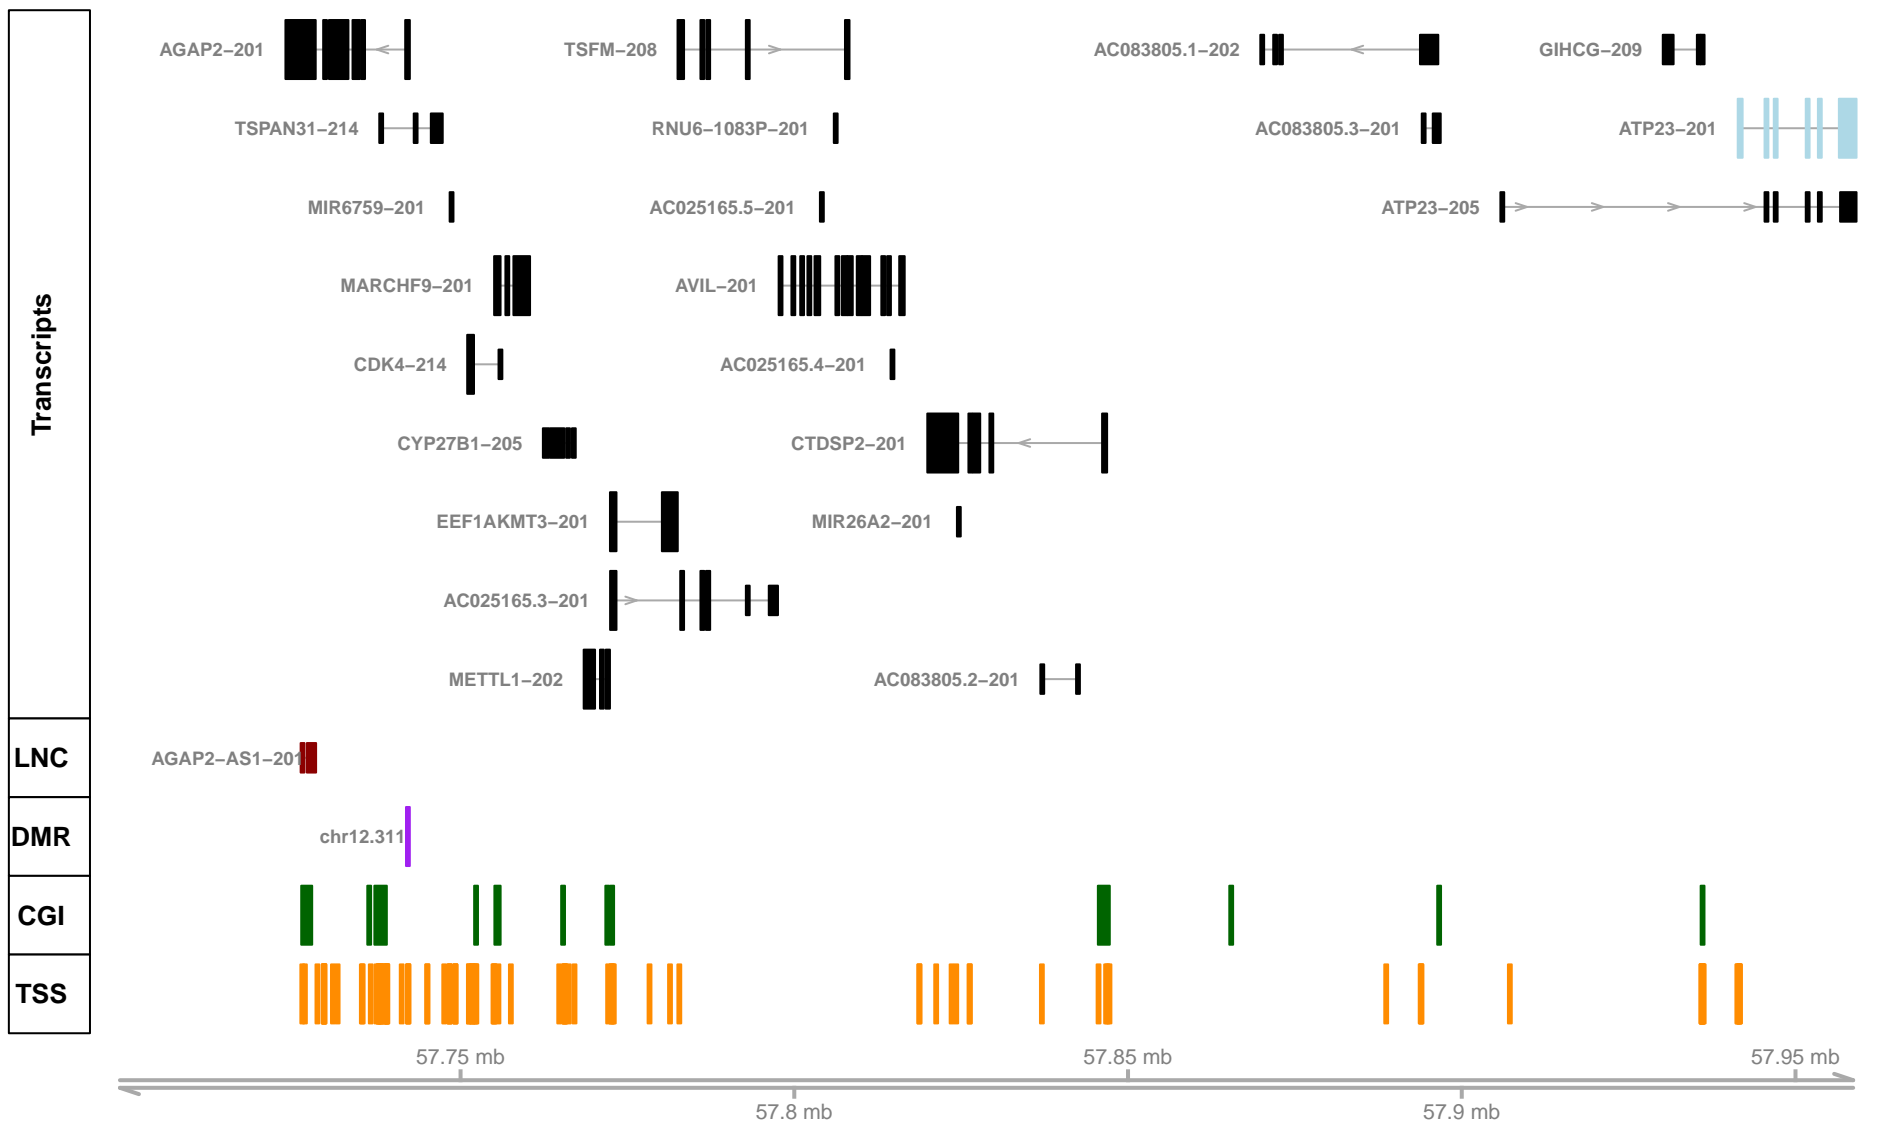

## chr12.311

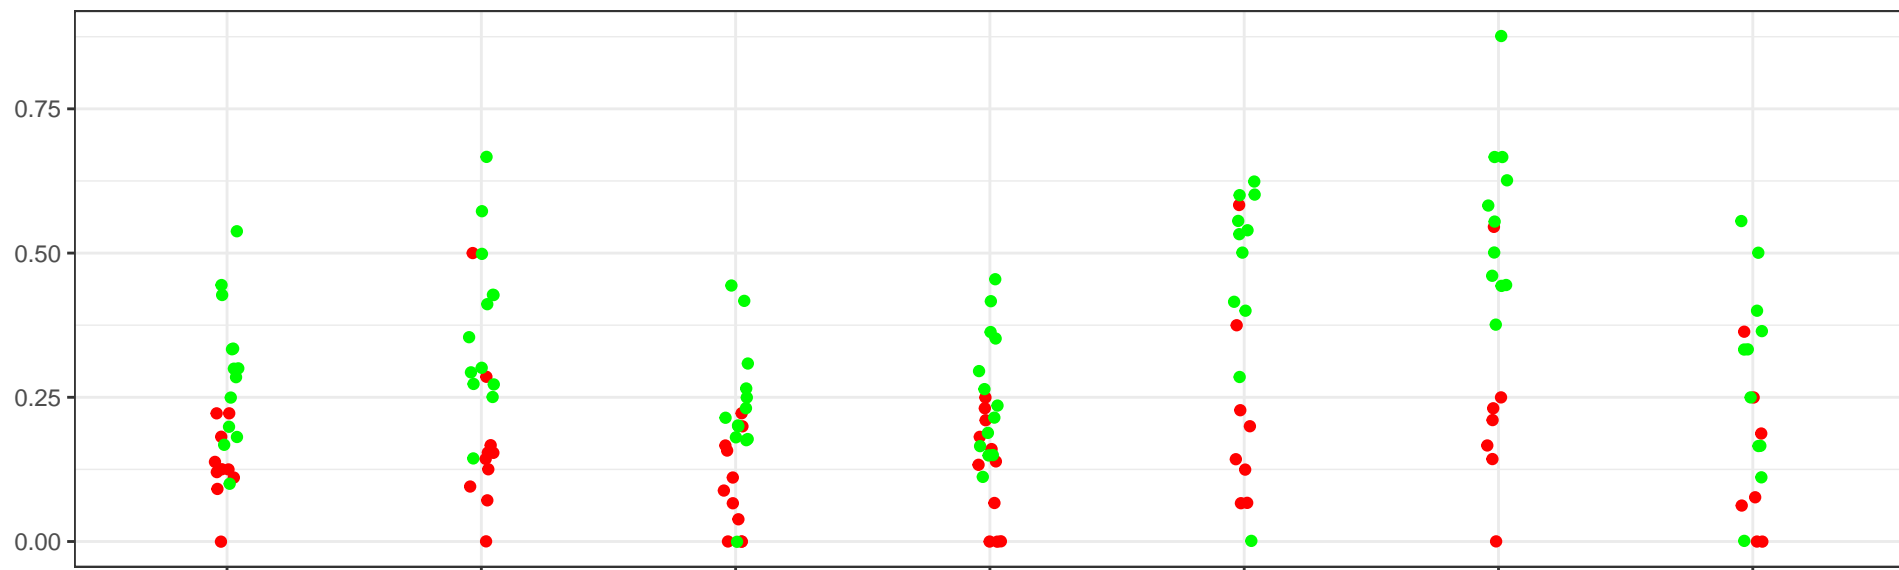

# AL008729.2

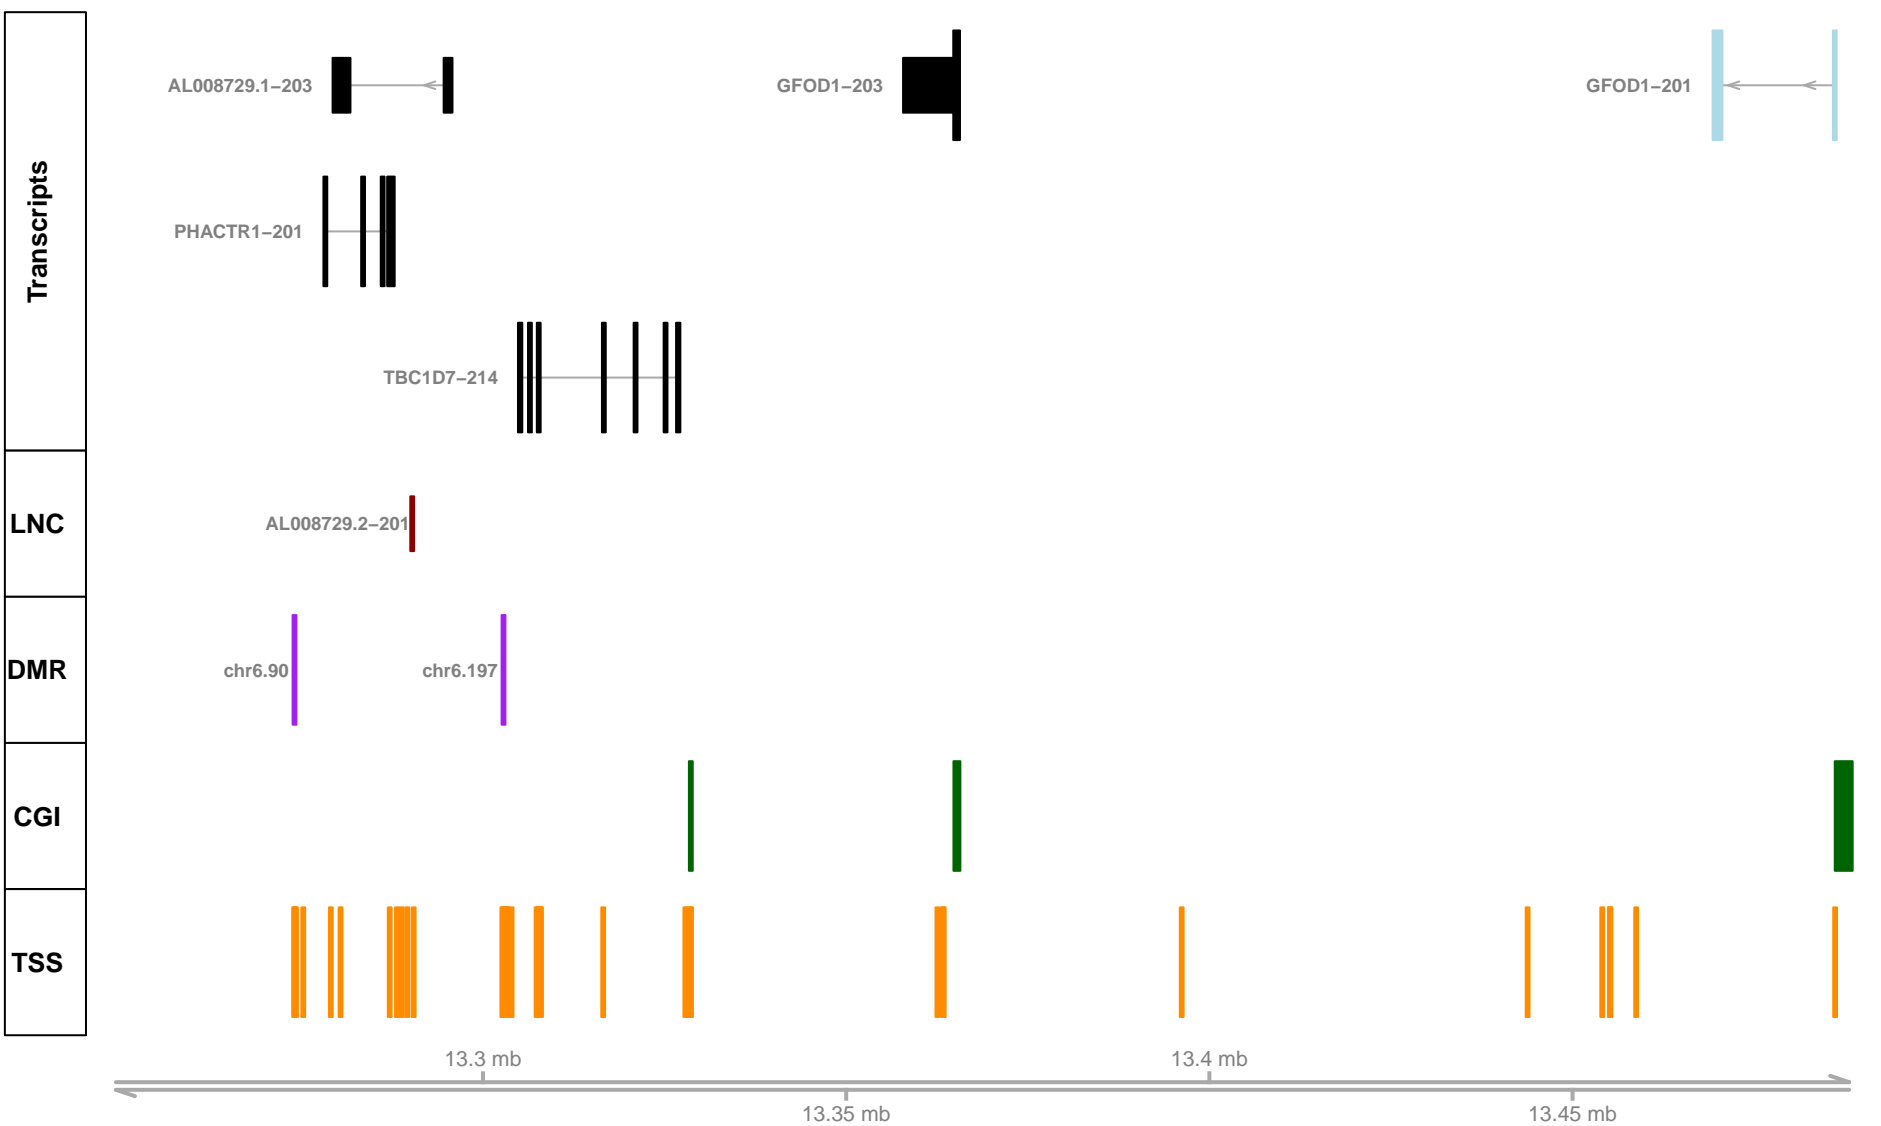

## chr6.197

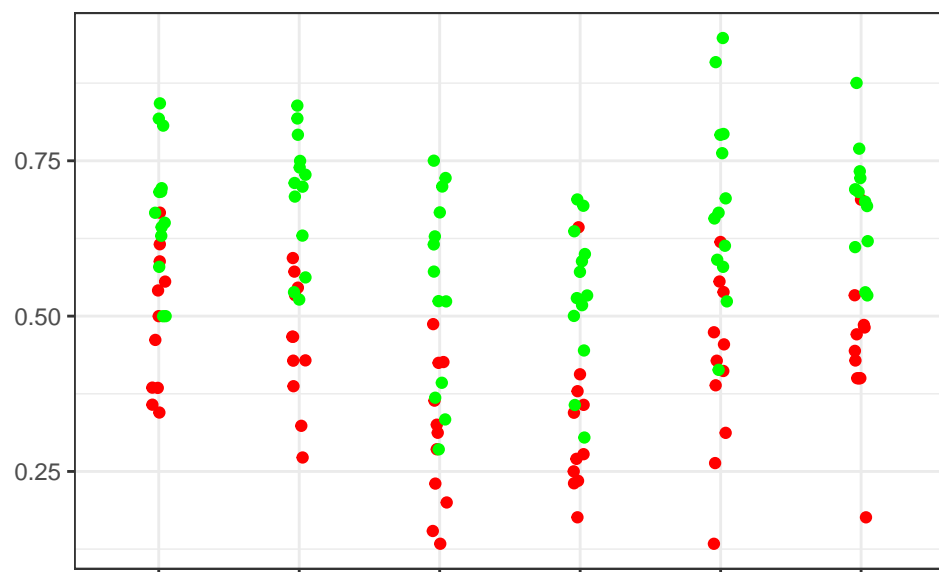

## chr6.90

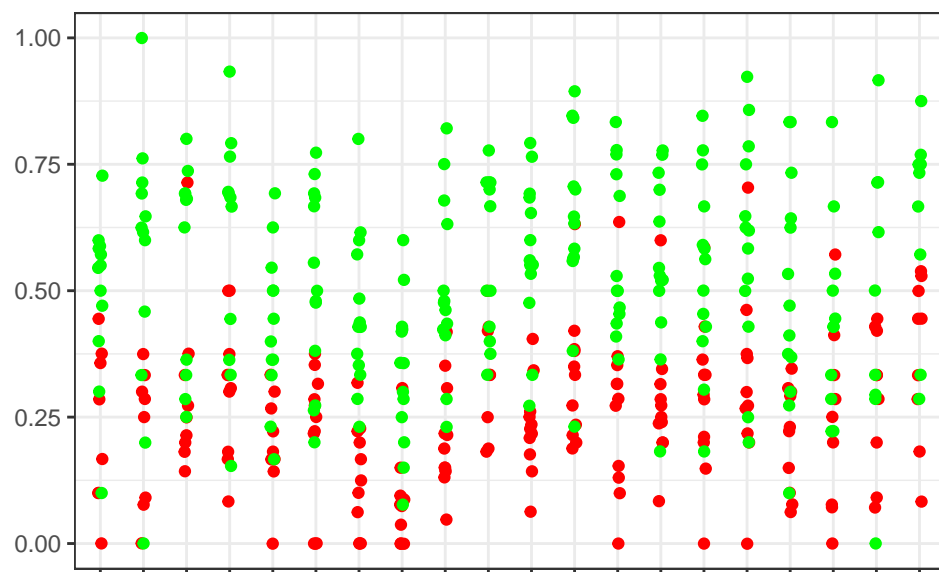

AL022067.1

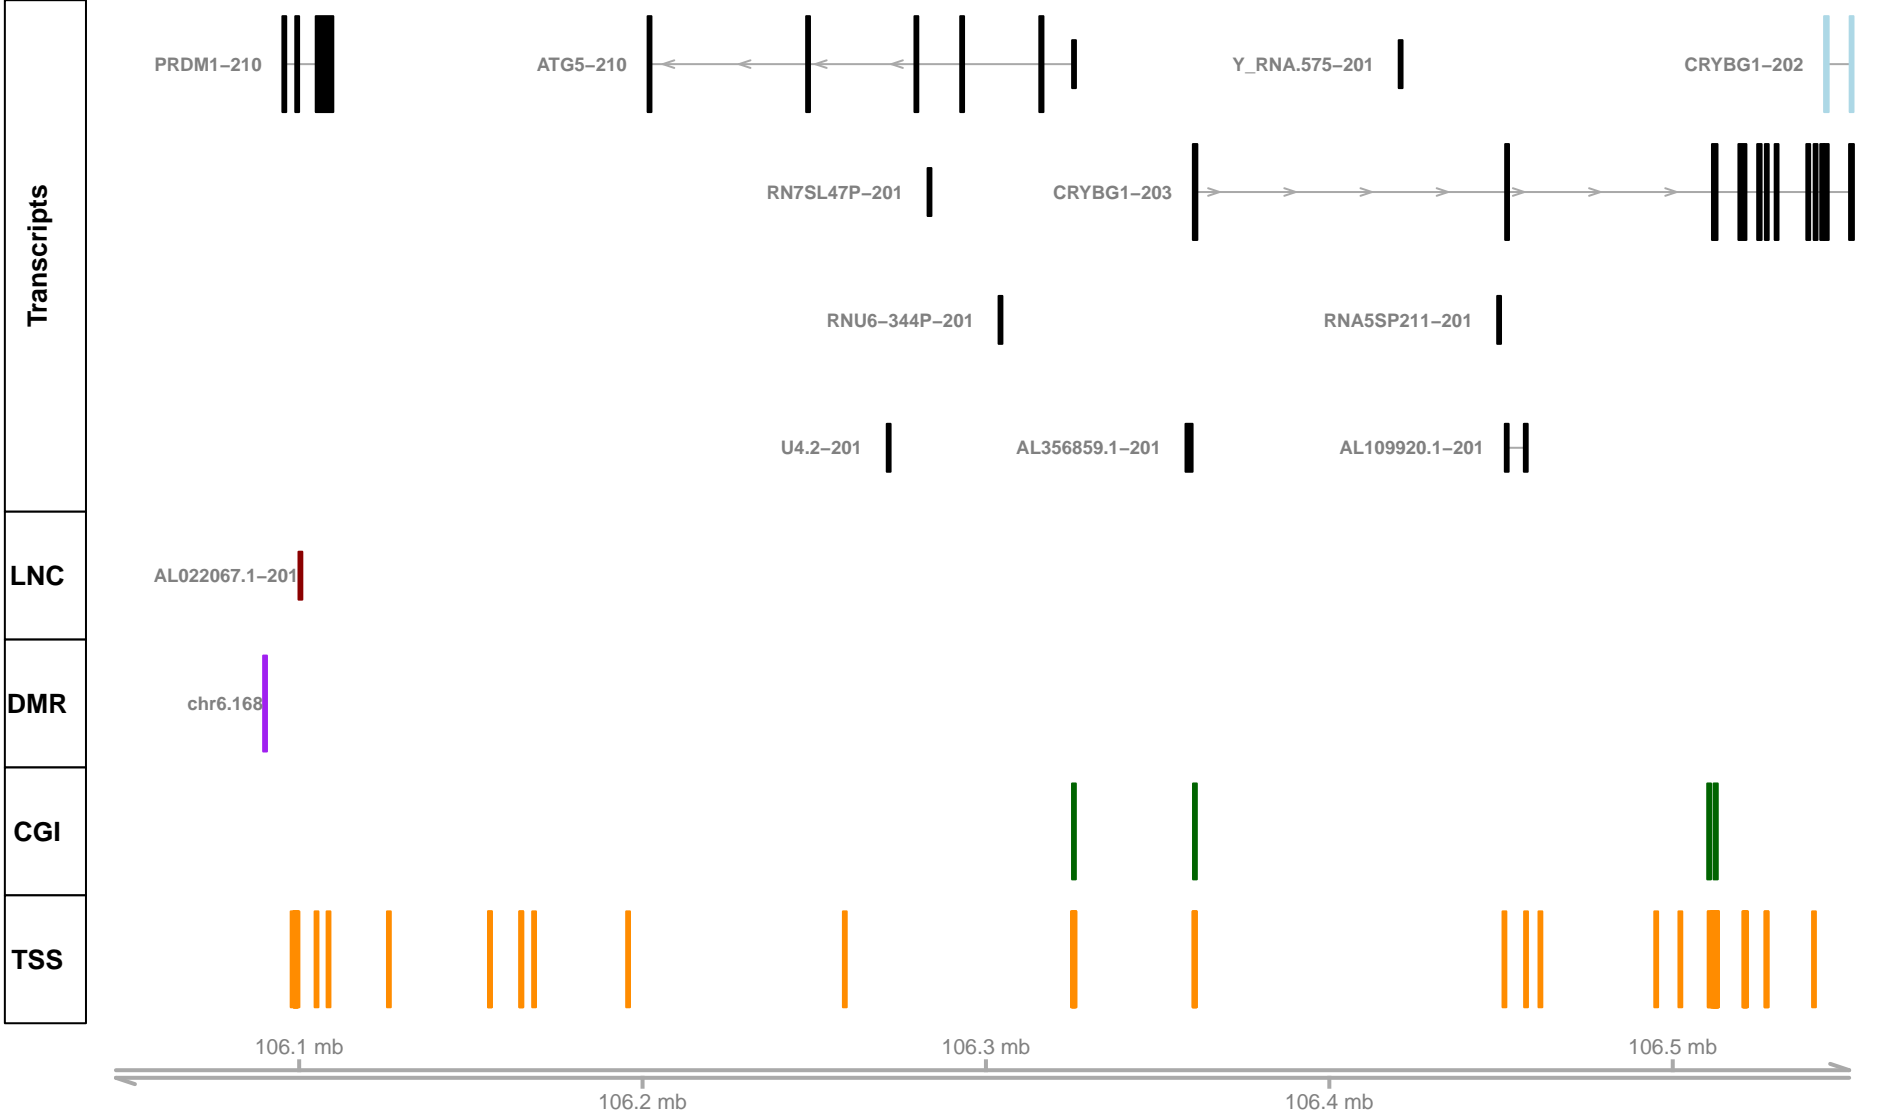

chr6.168

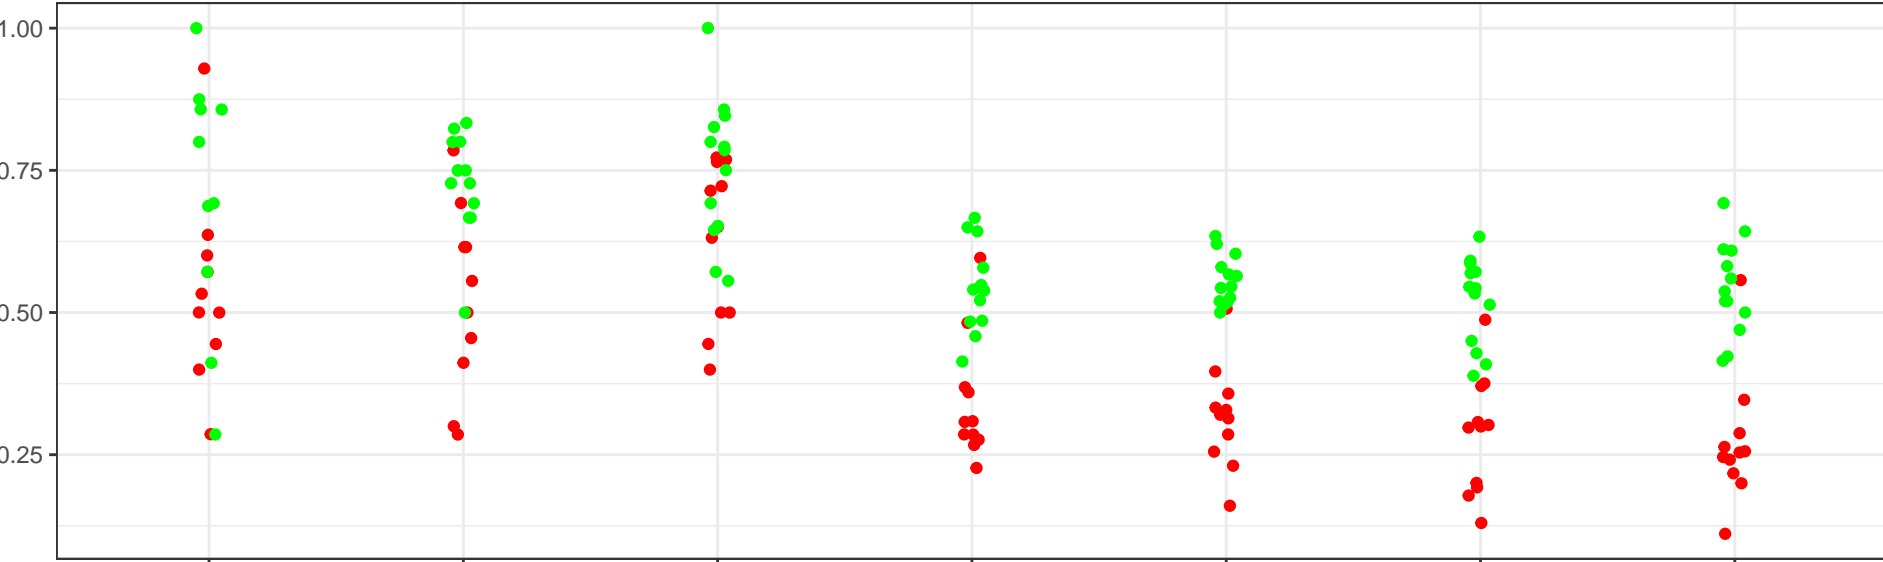

AL022318.1

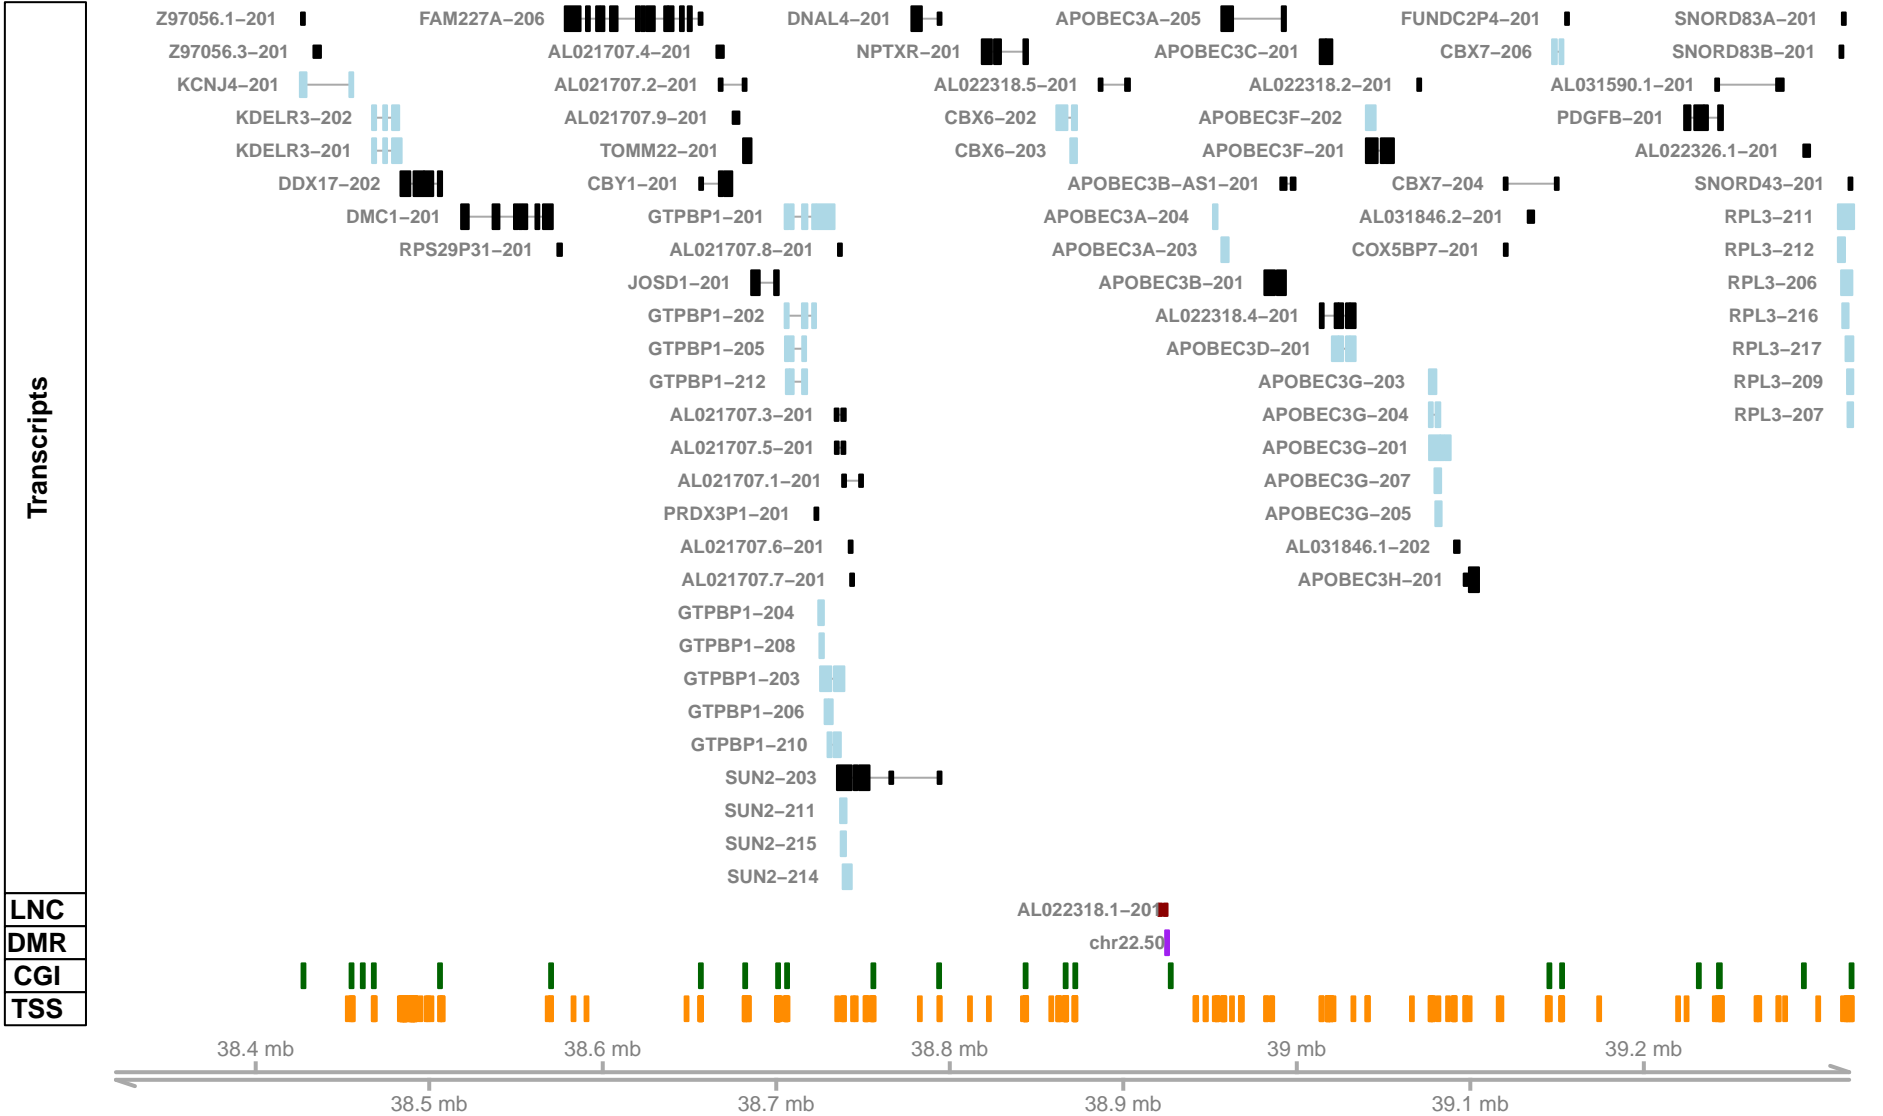

chr22.50

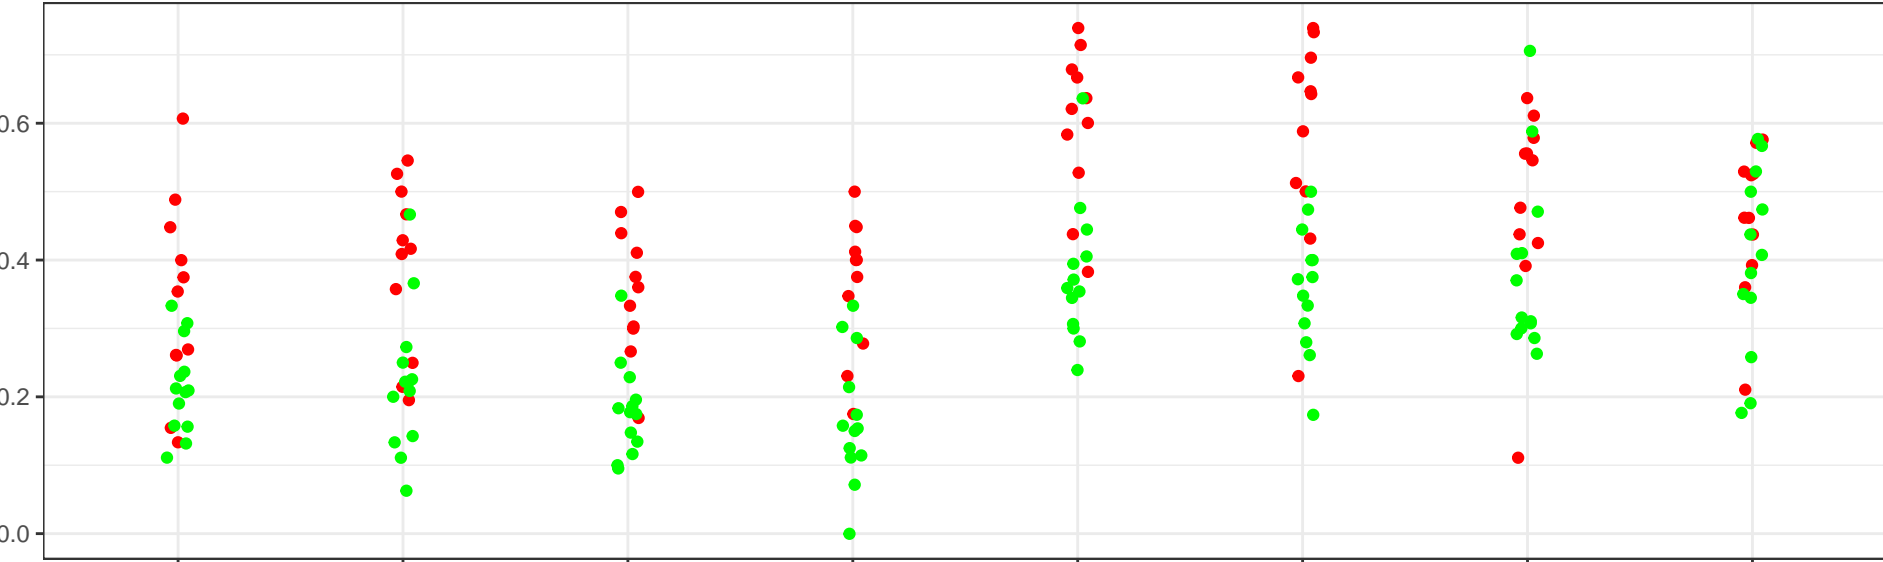

# AL023653.1

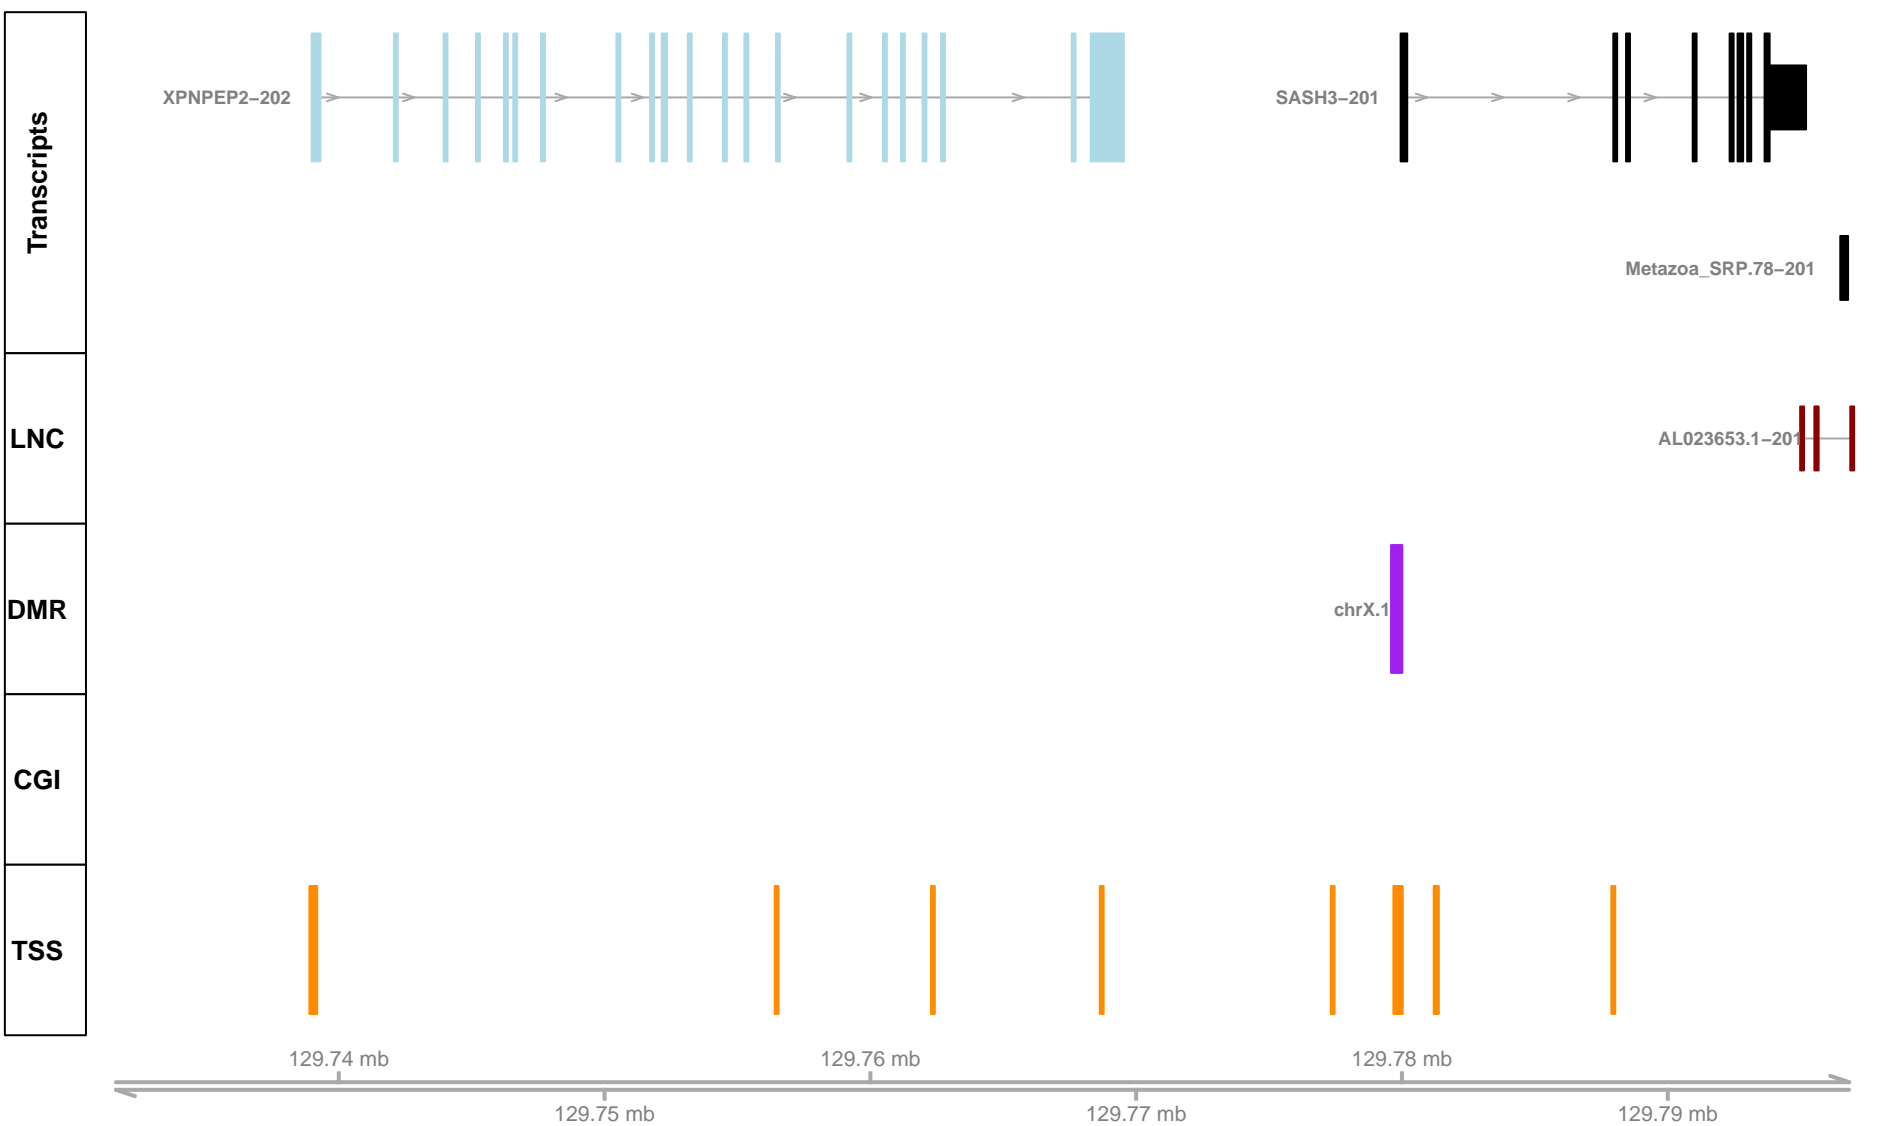

## chrX.1

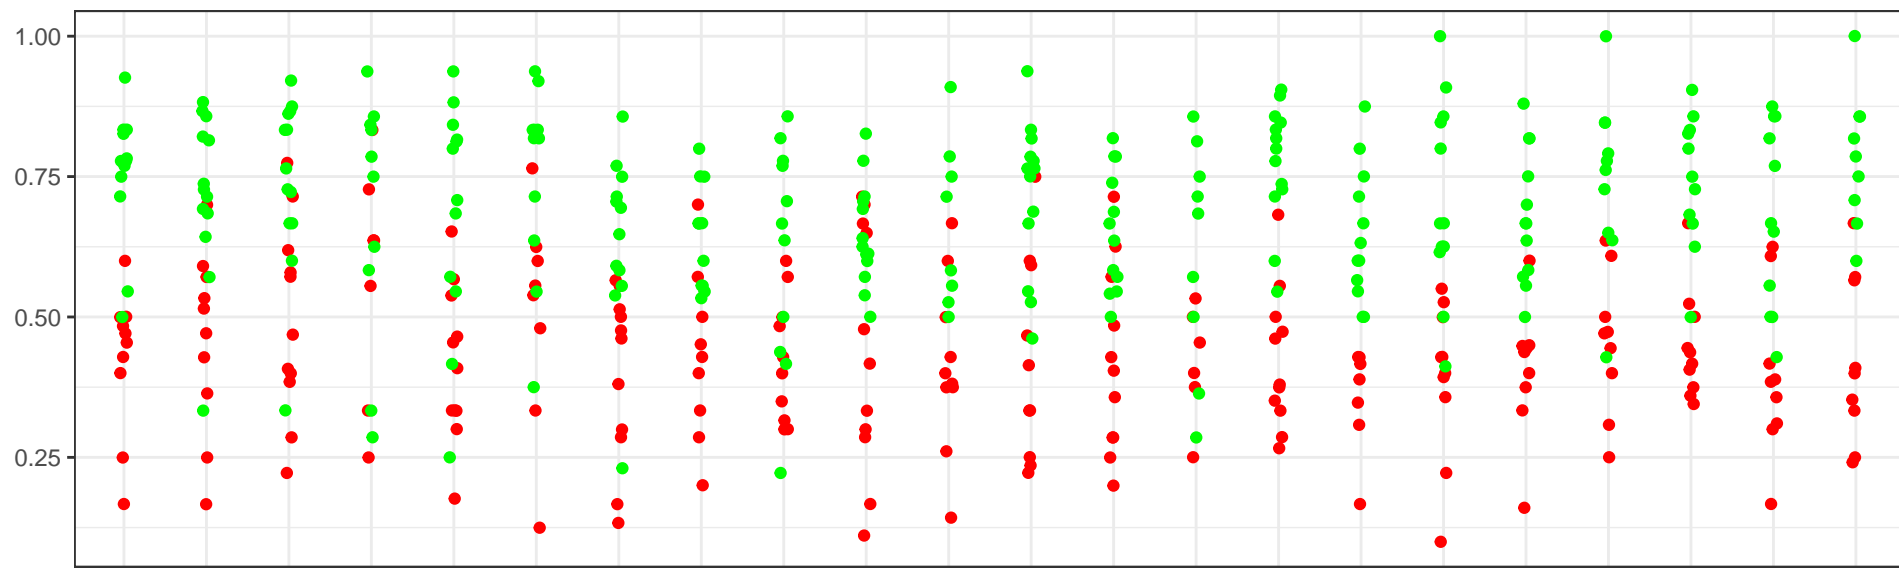

AL031600.1

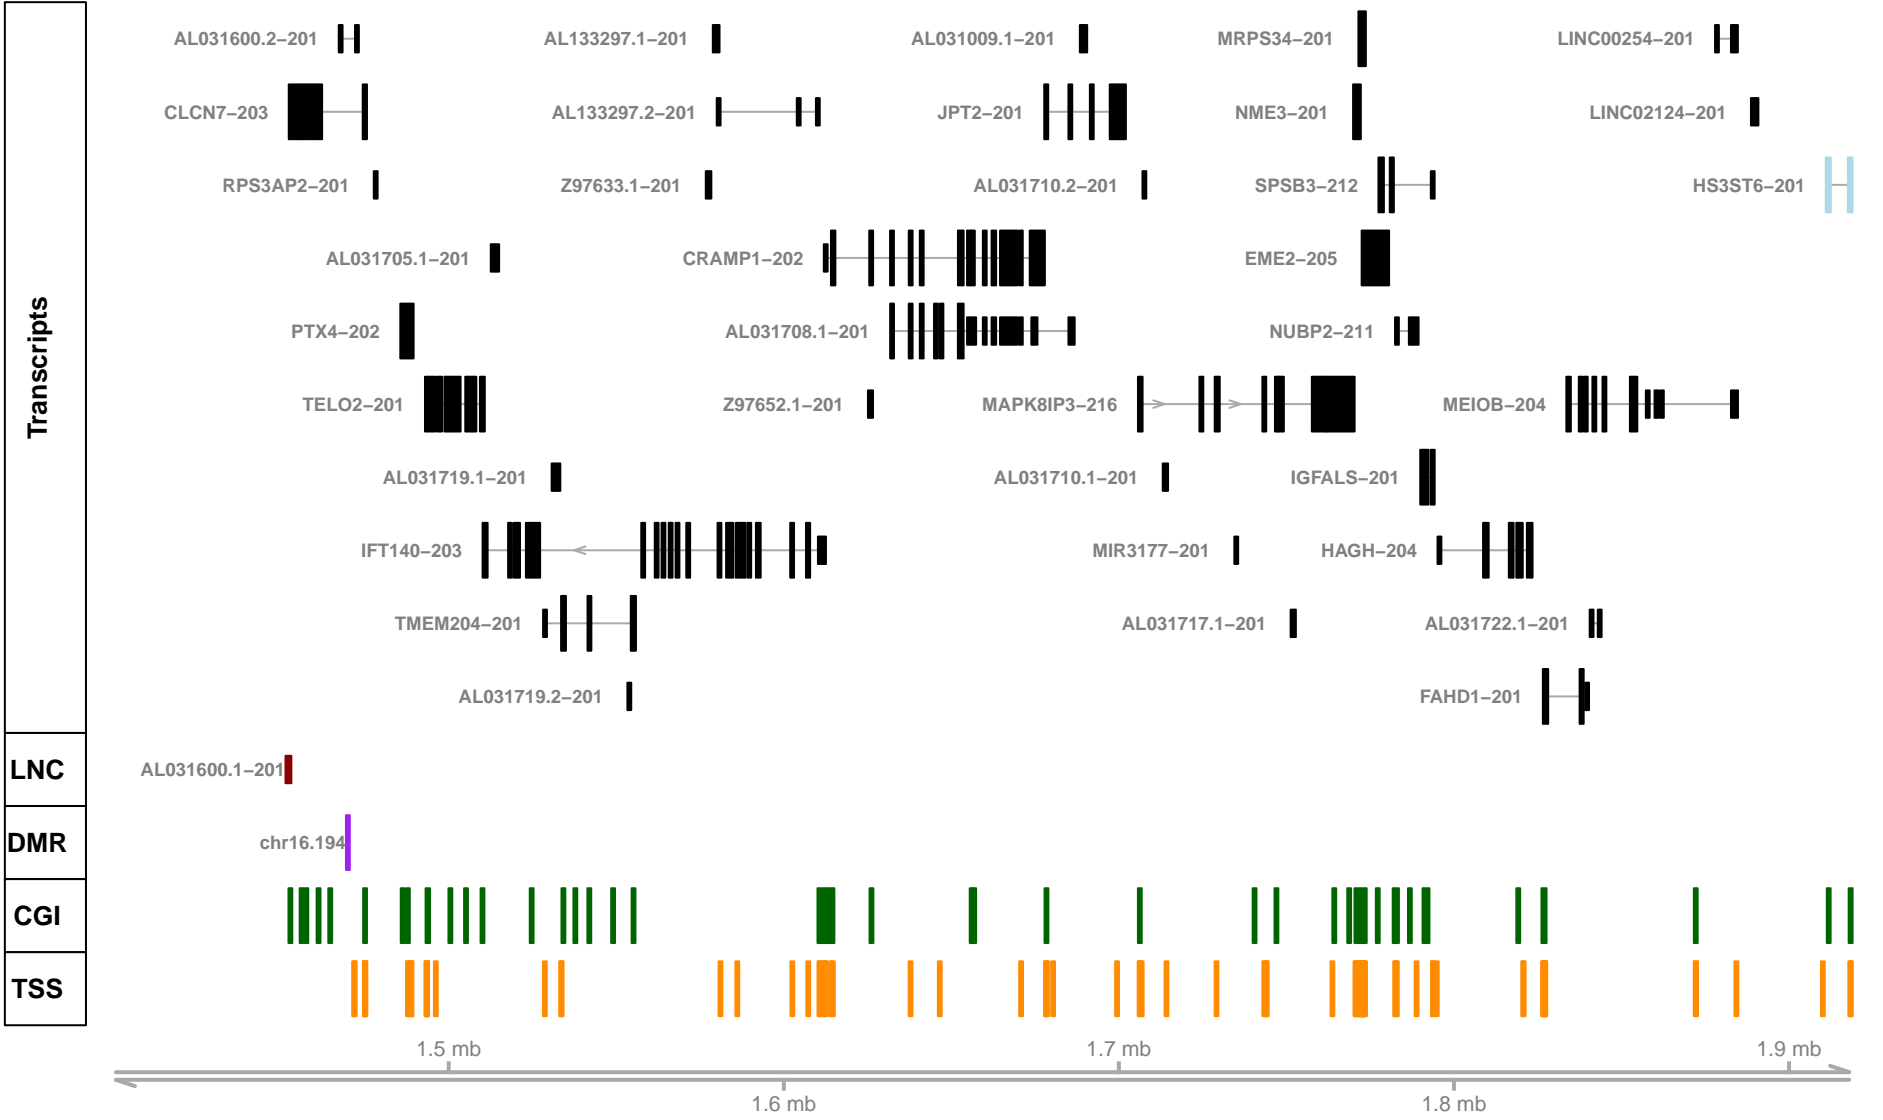

chr16.194

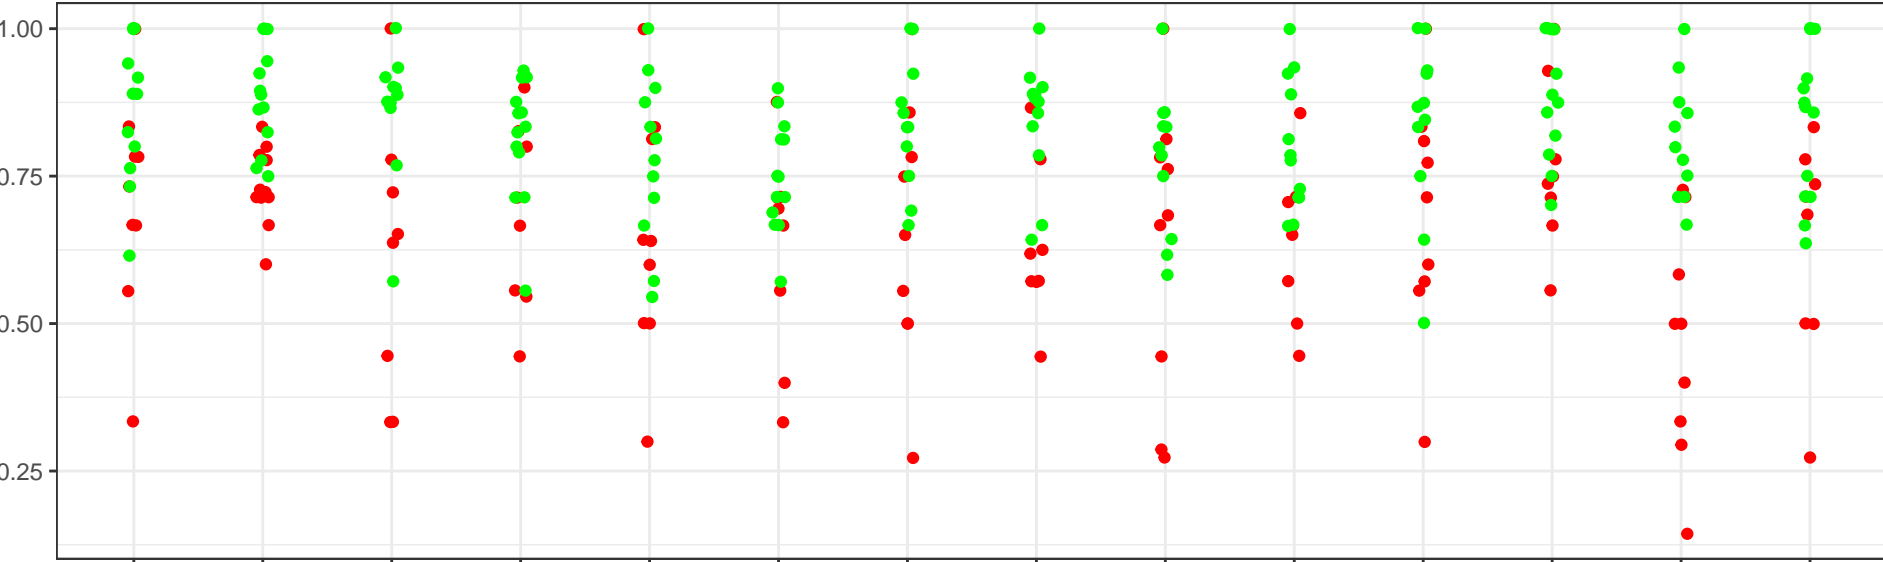

AL031733.2

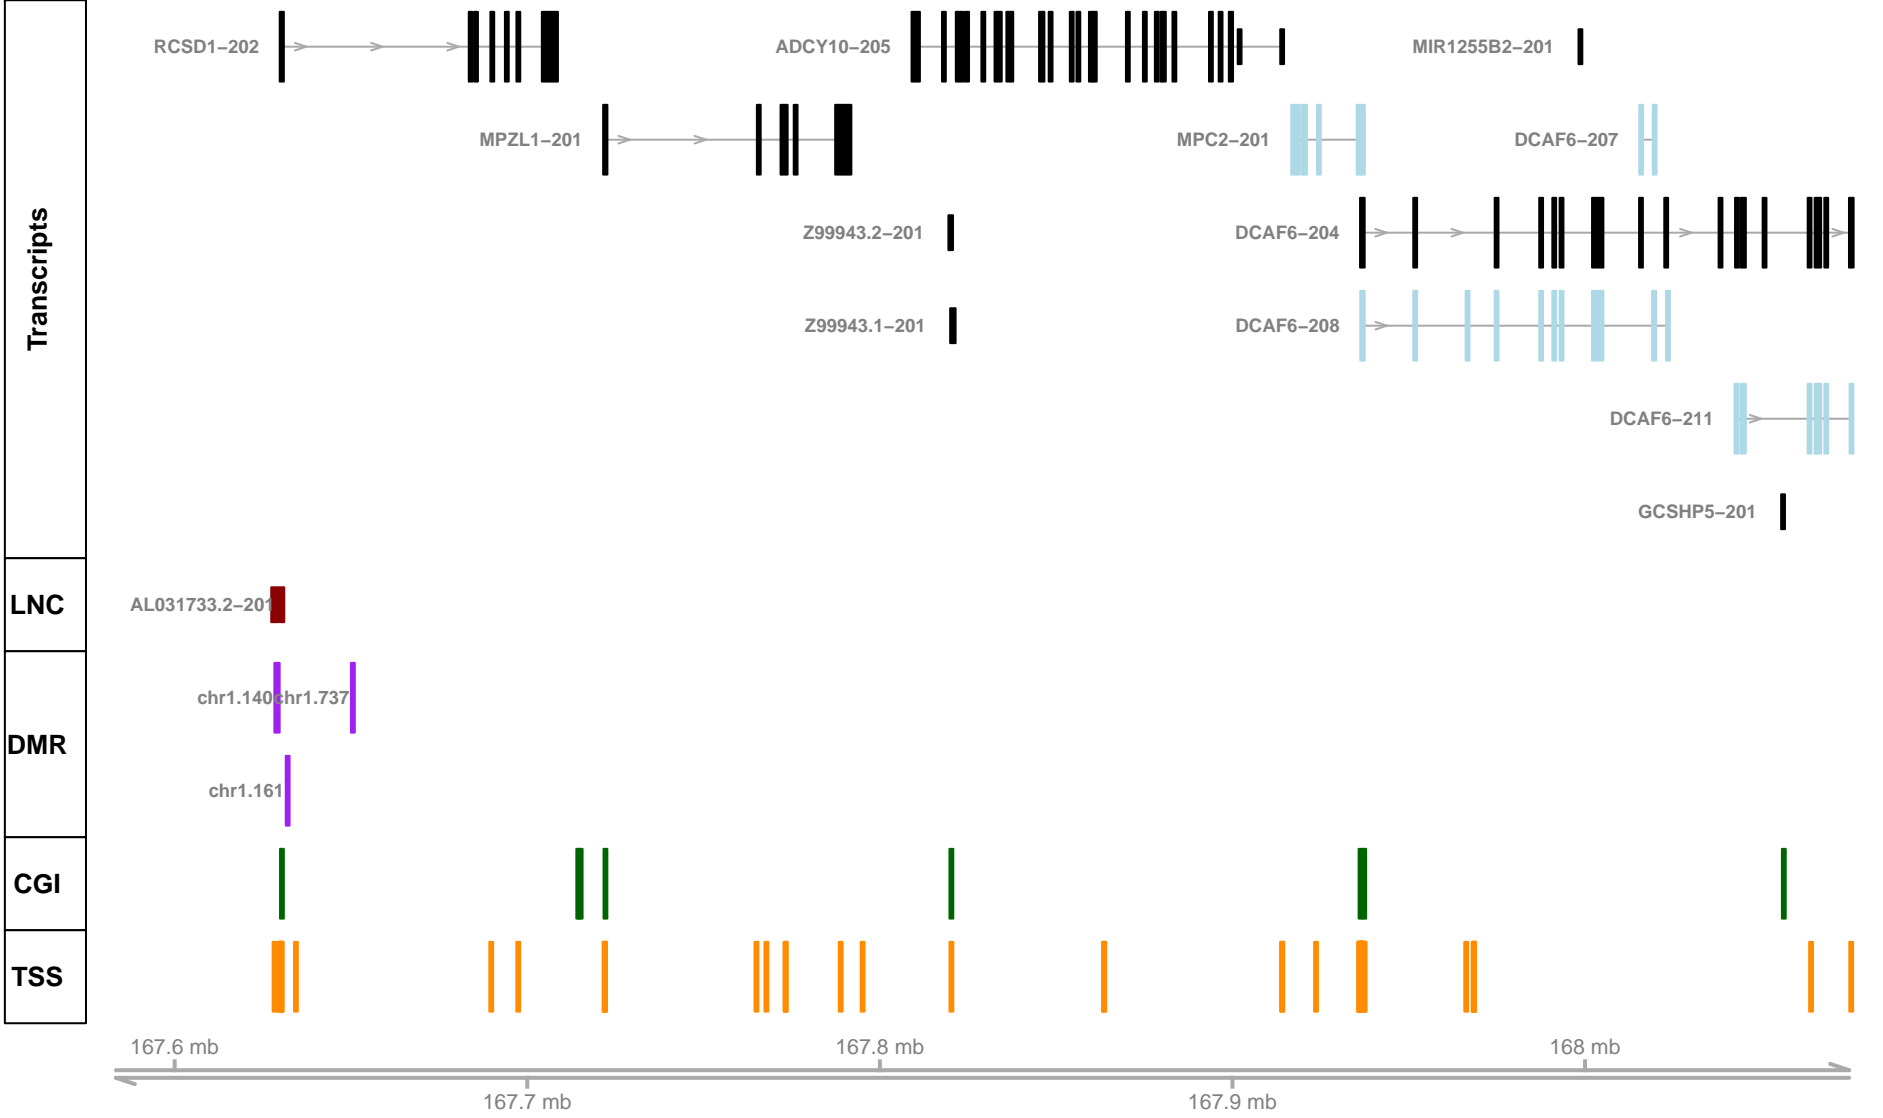

chr1.737

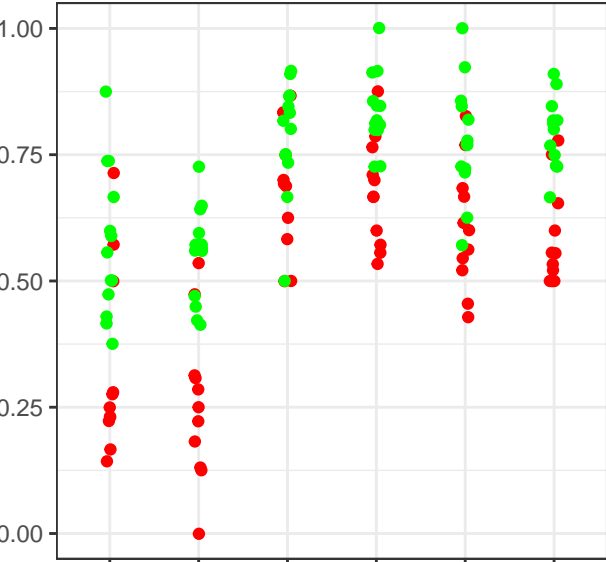

chr1.161

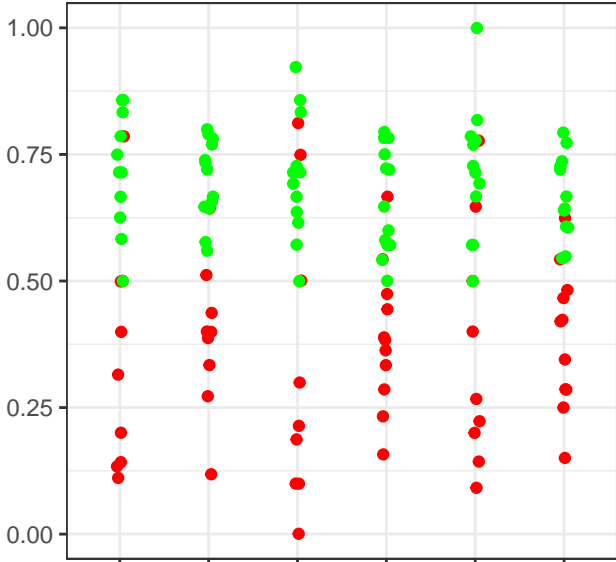

chr1.140

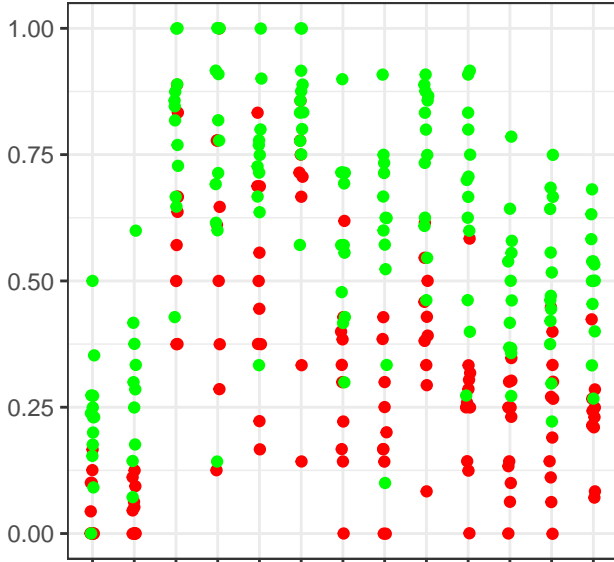

# AL035530.2

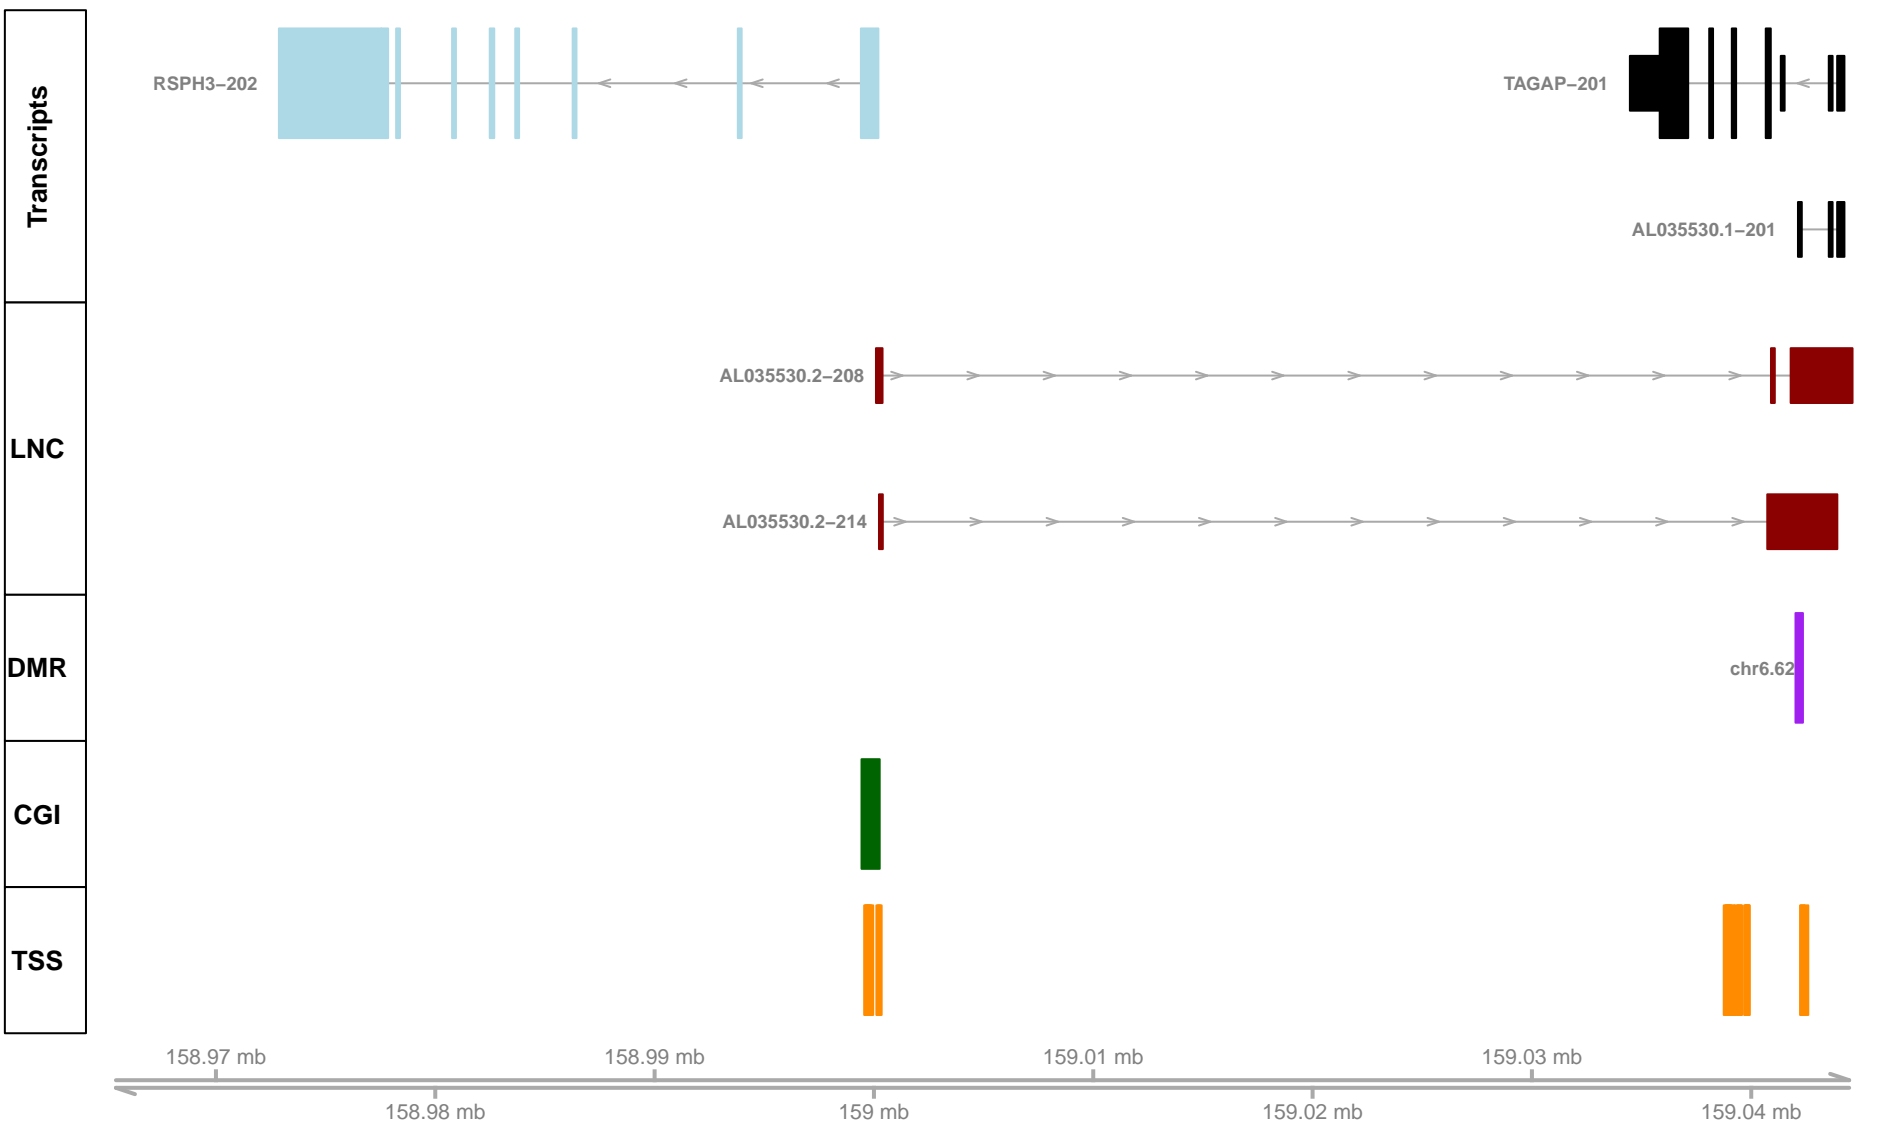

## chr6.62

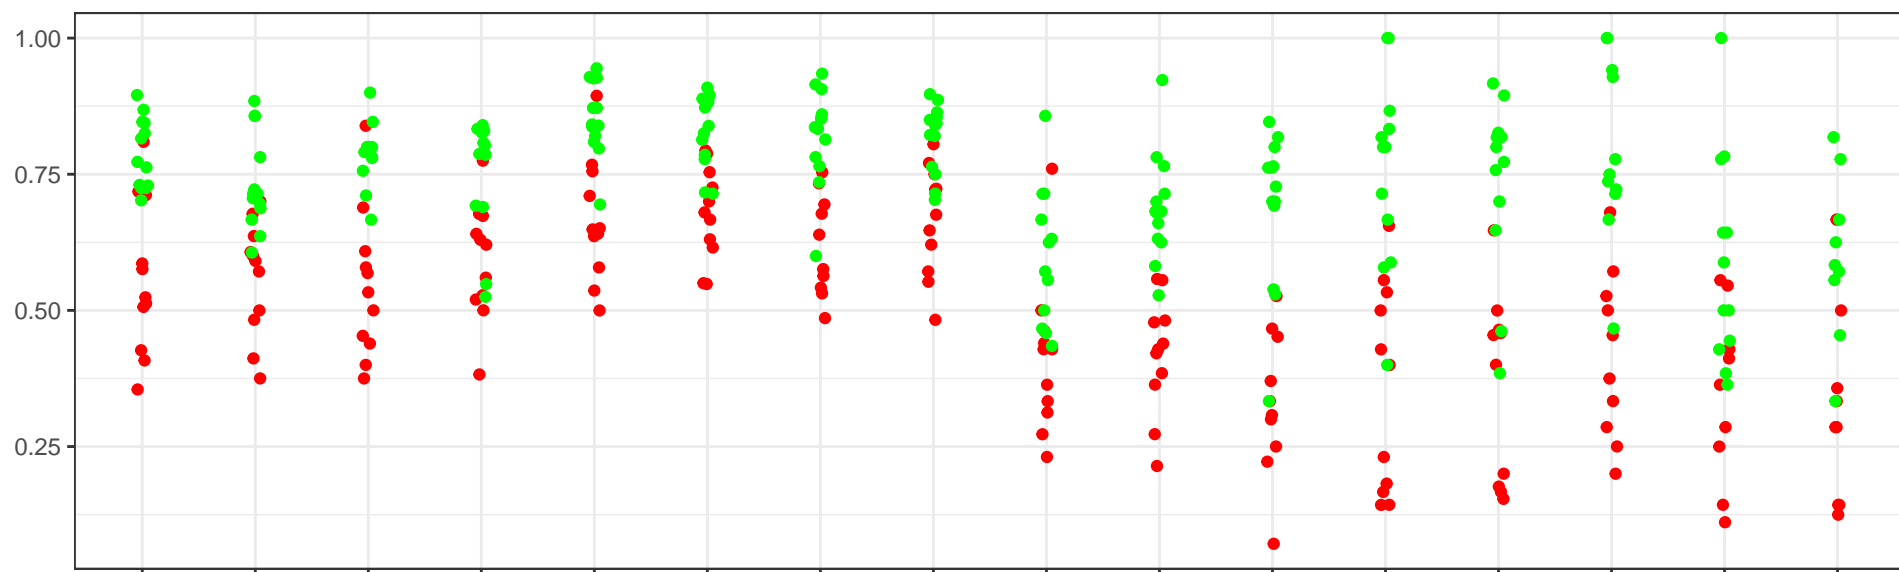

AL121672.1

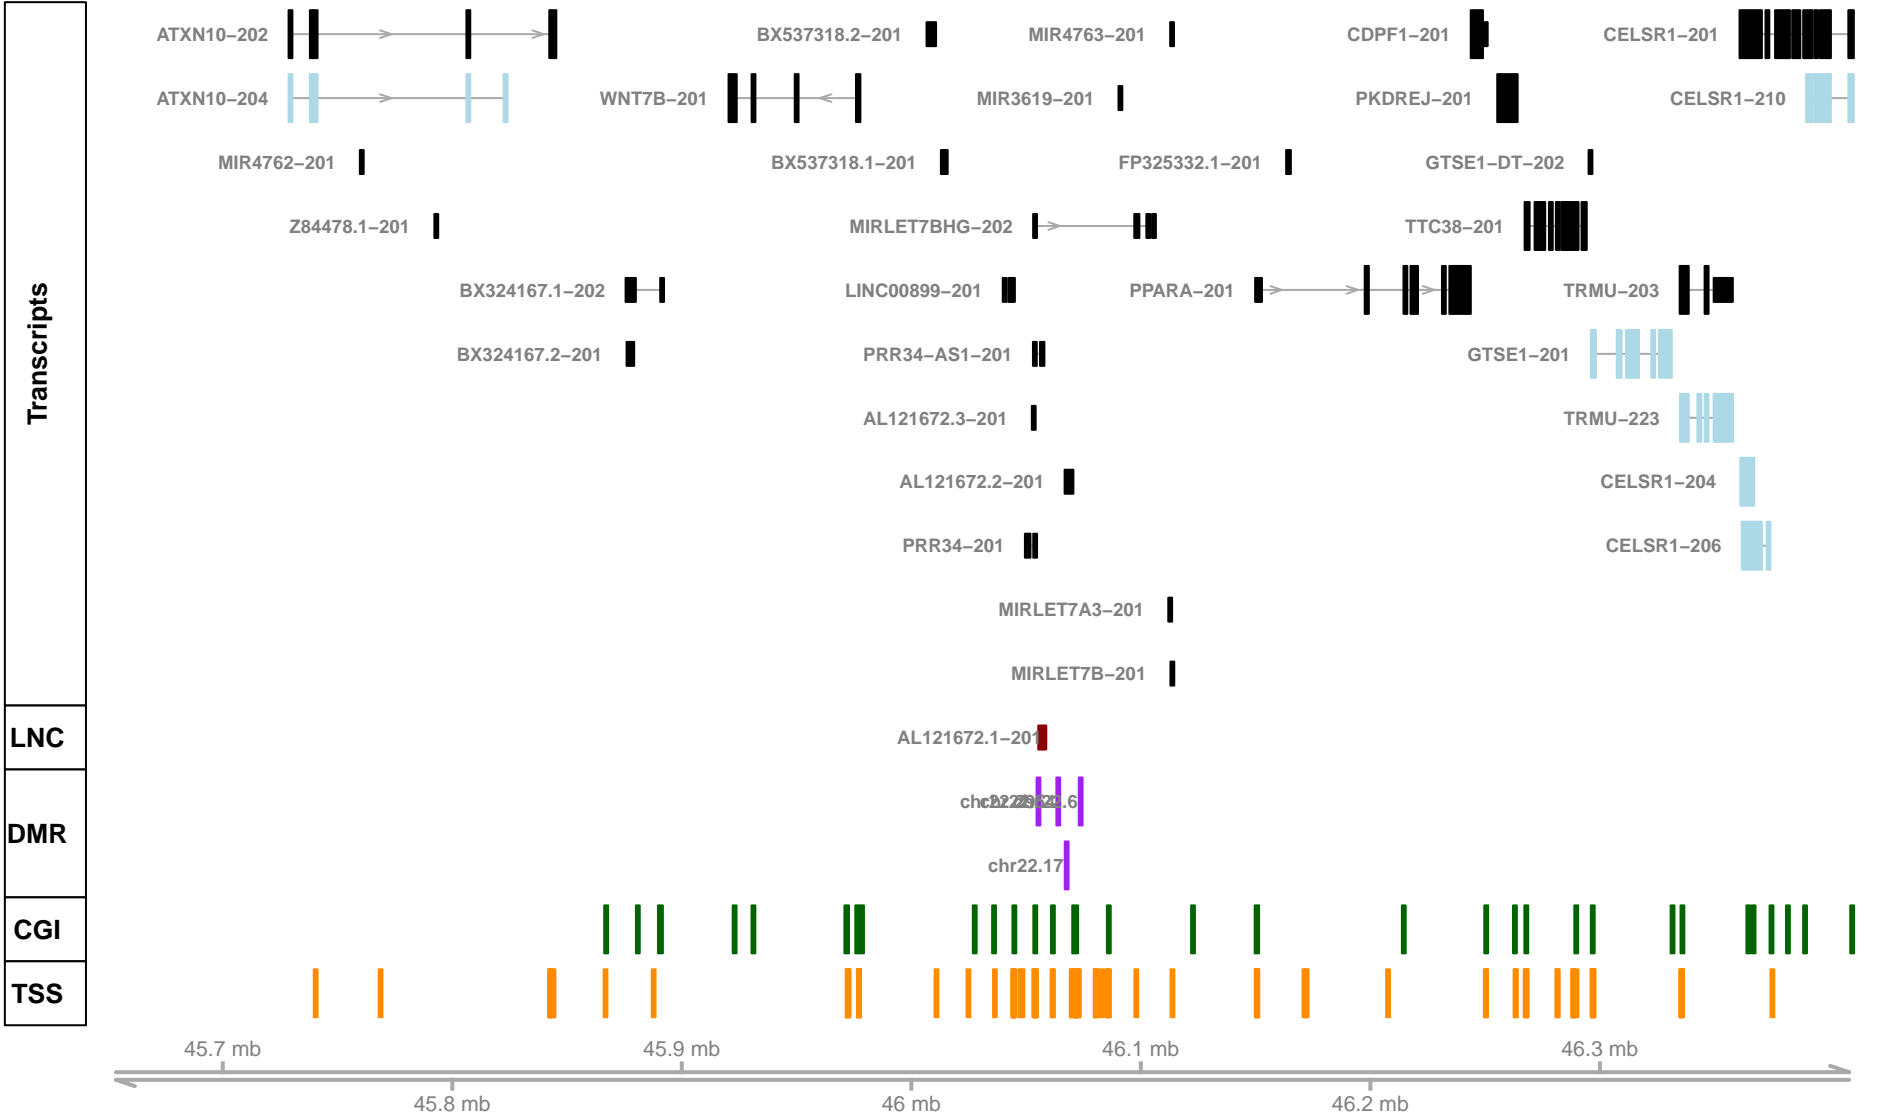

chr22.54

chr22.17

chr22.6

chr22.29

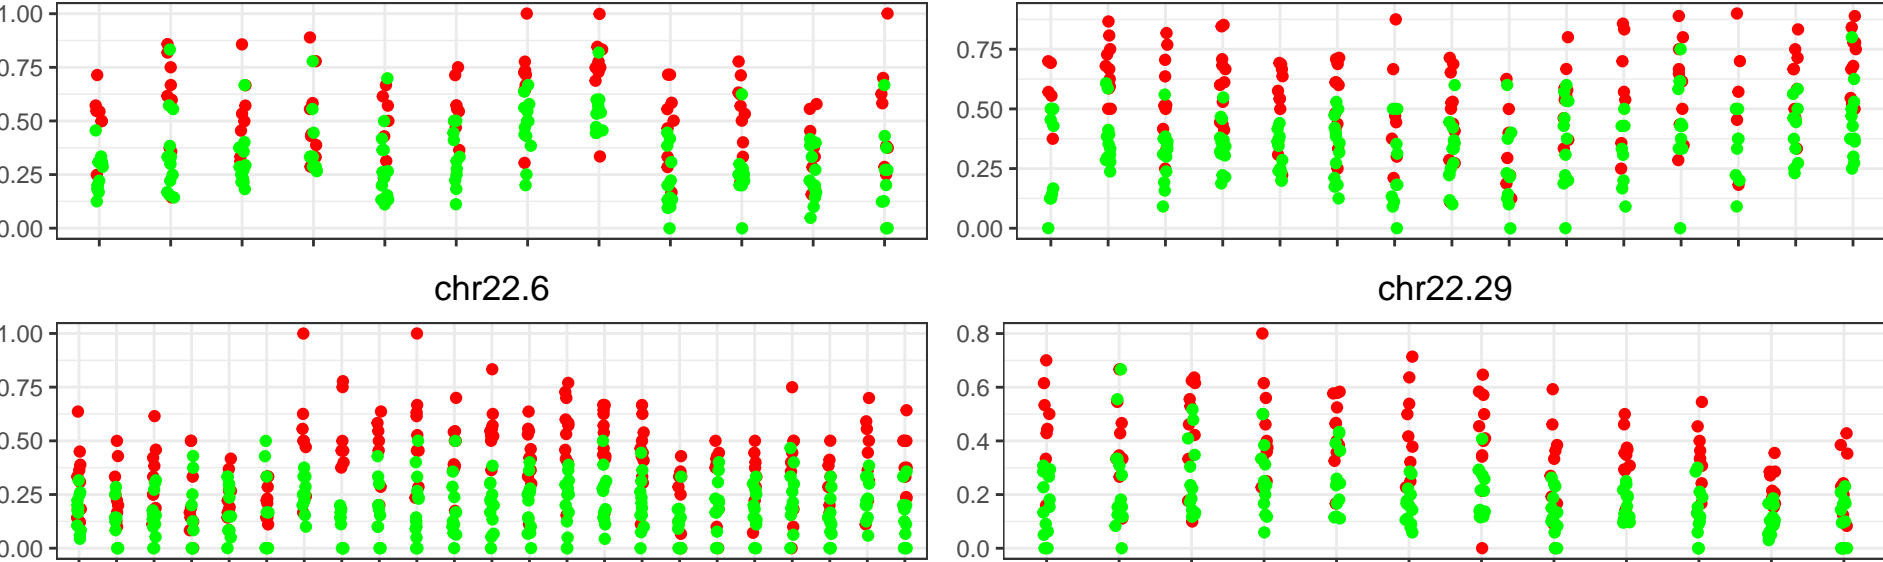

# AL121985.1

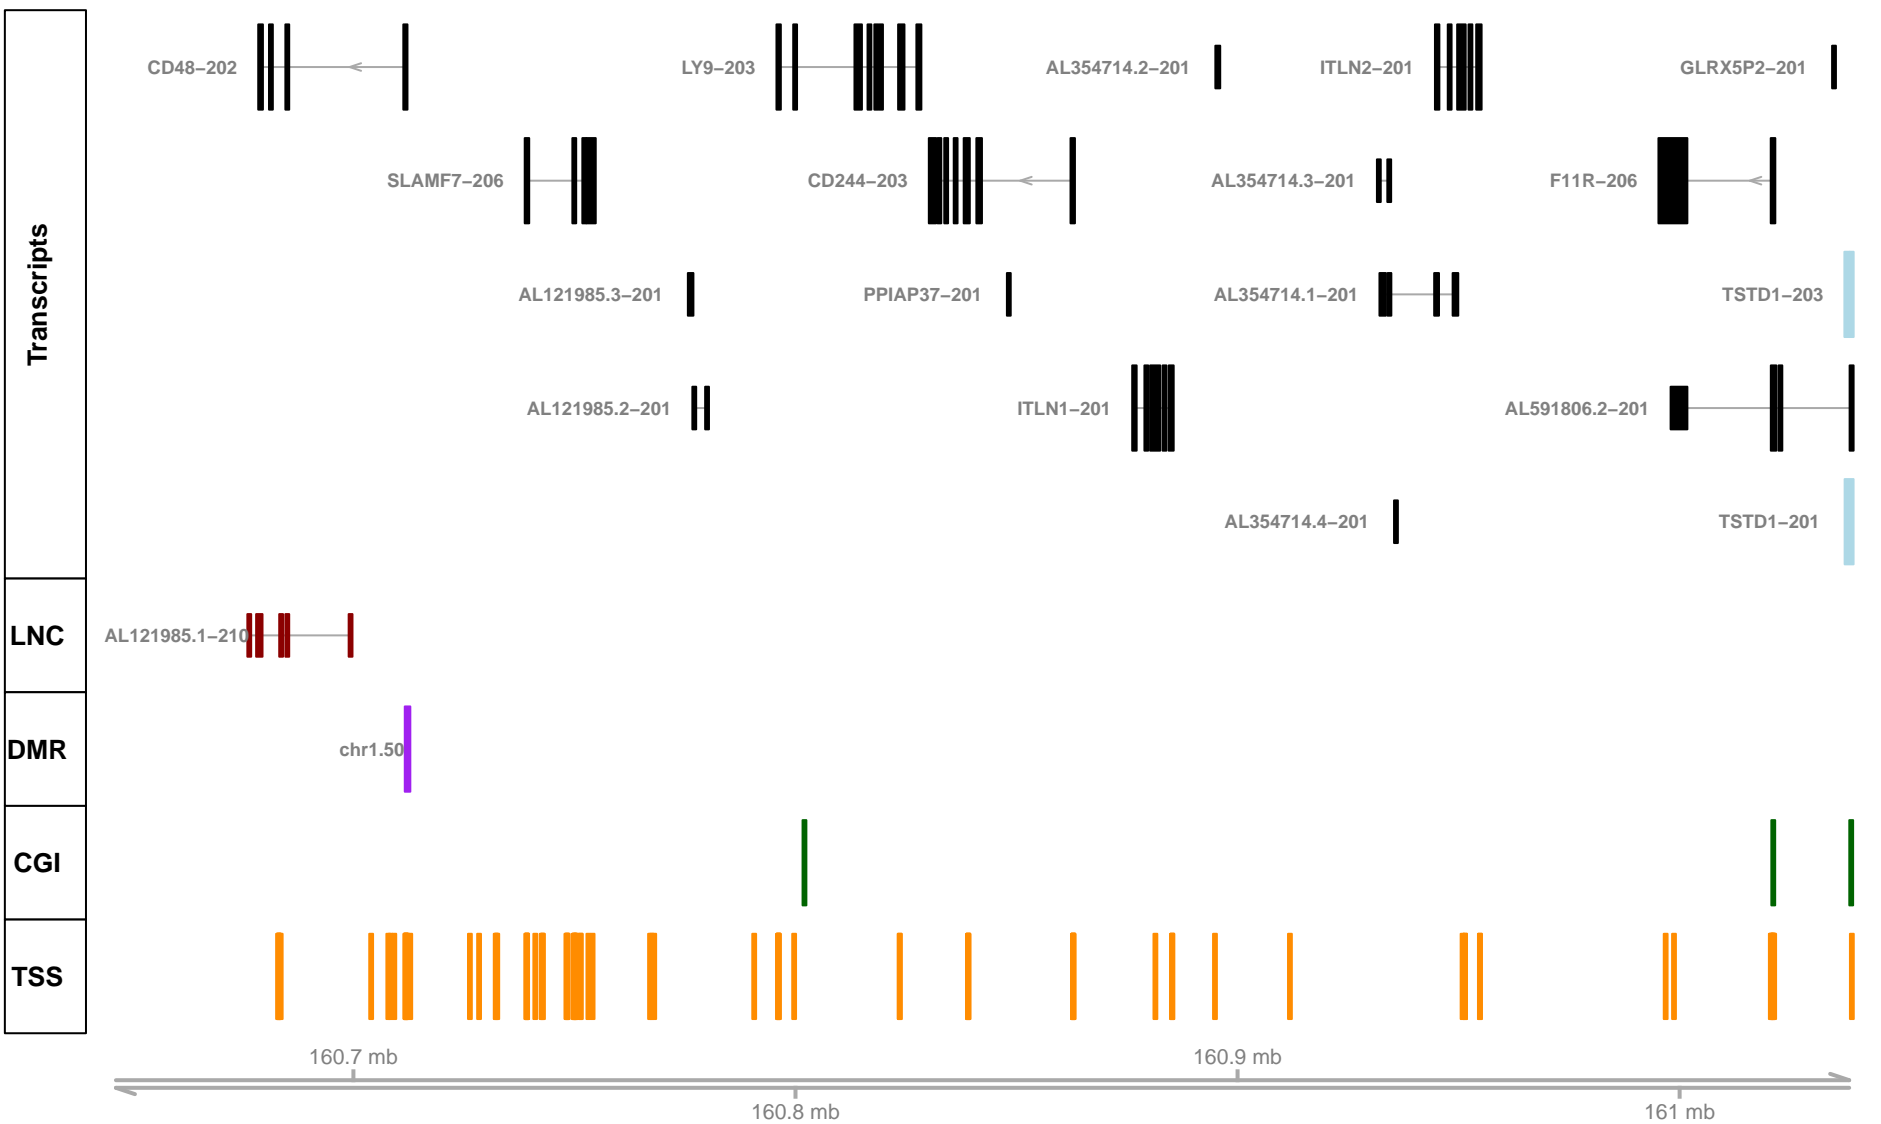

## chr1.50

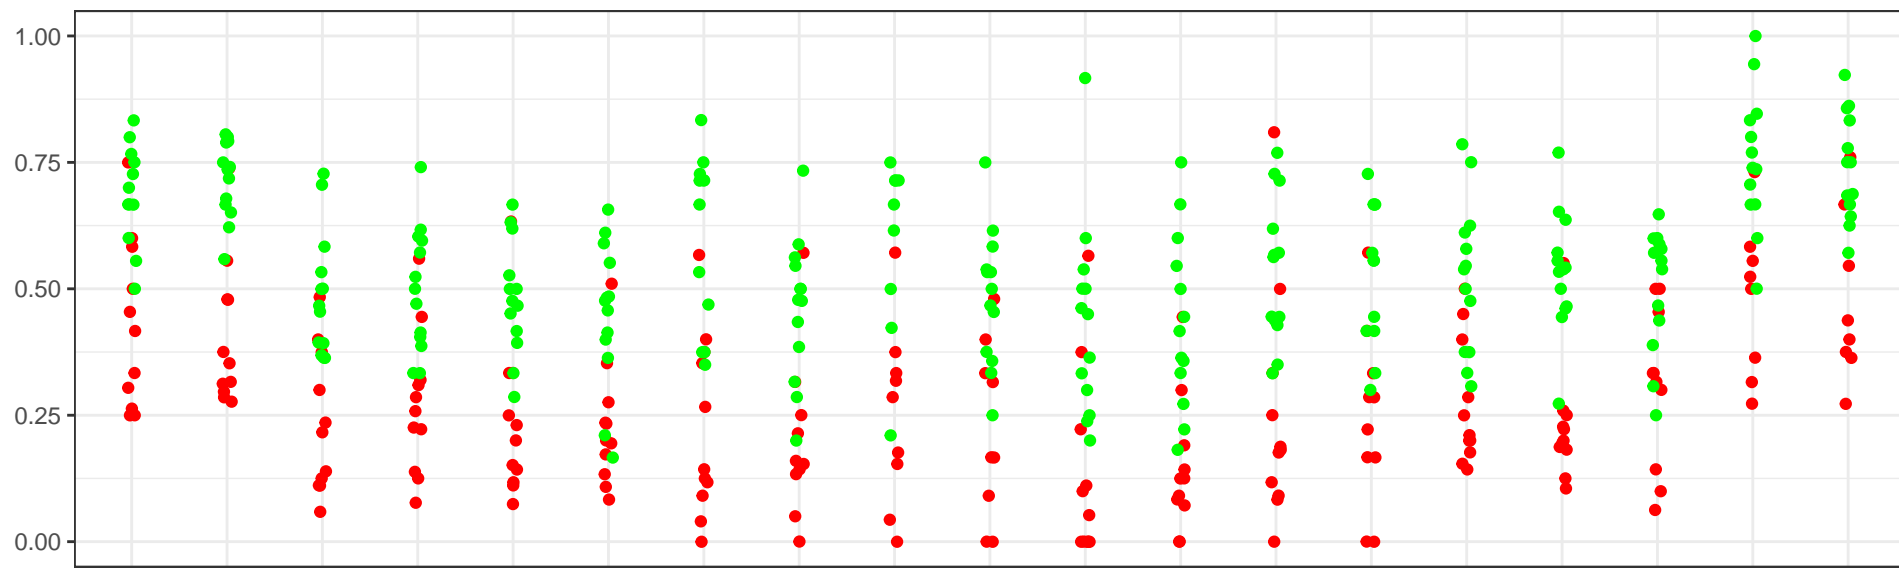

AL135926.1

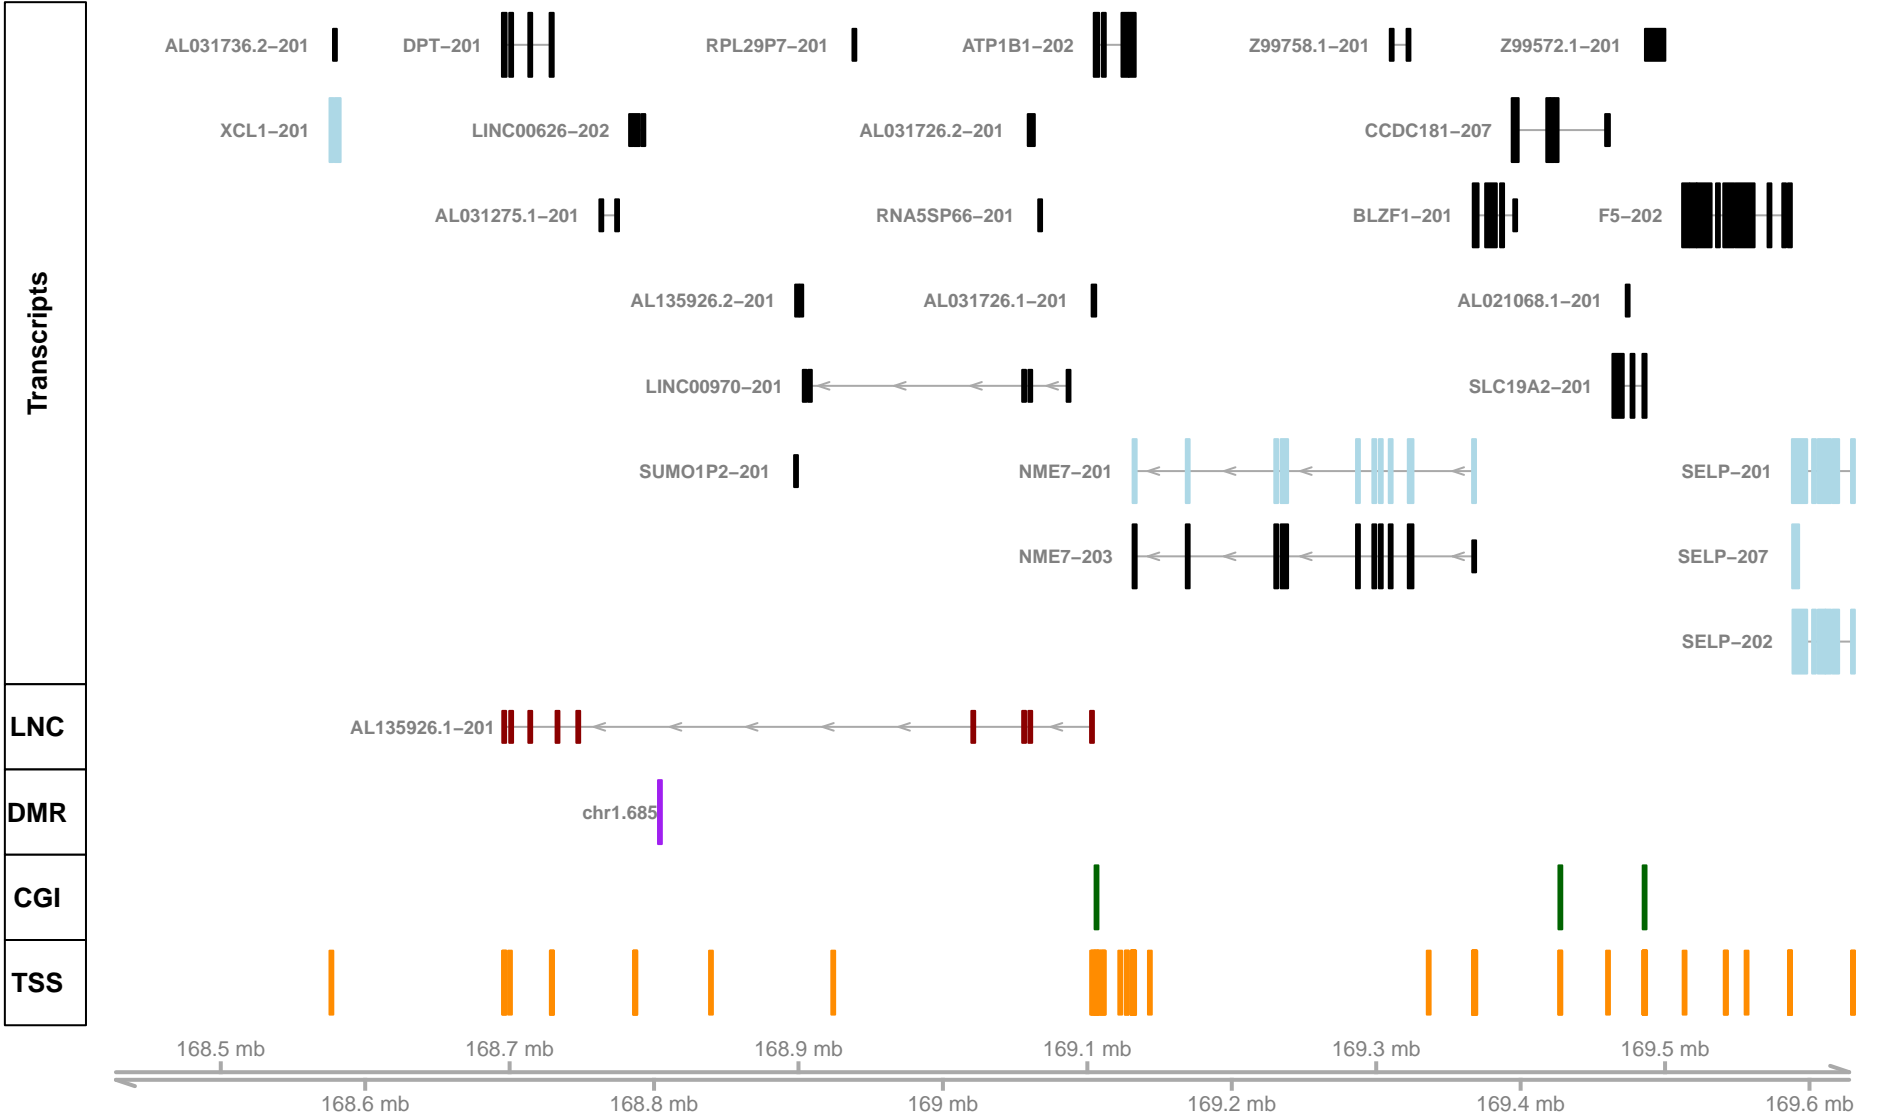

chr1.685

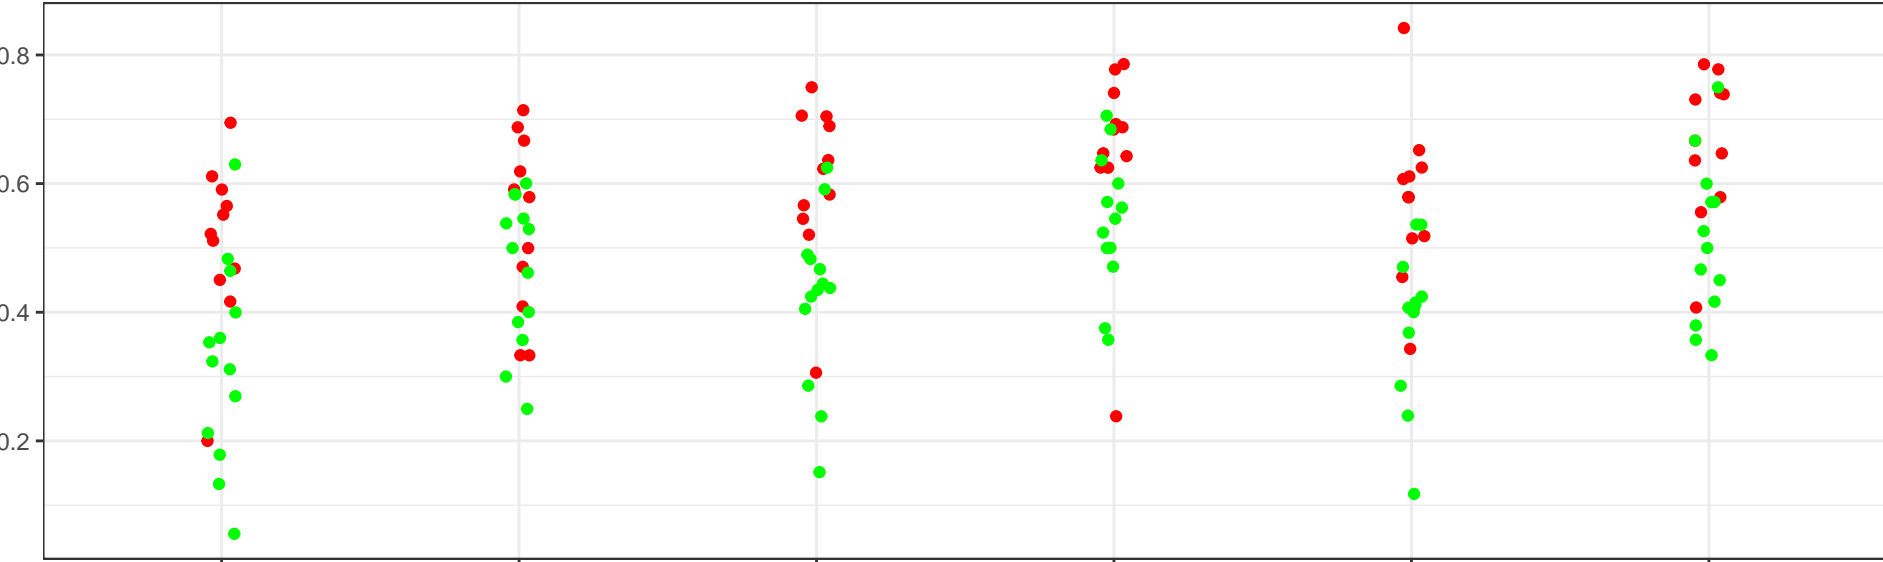

AL138930.1

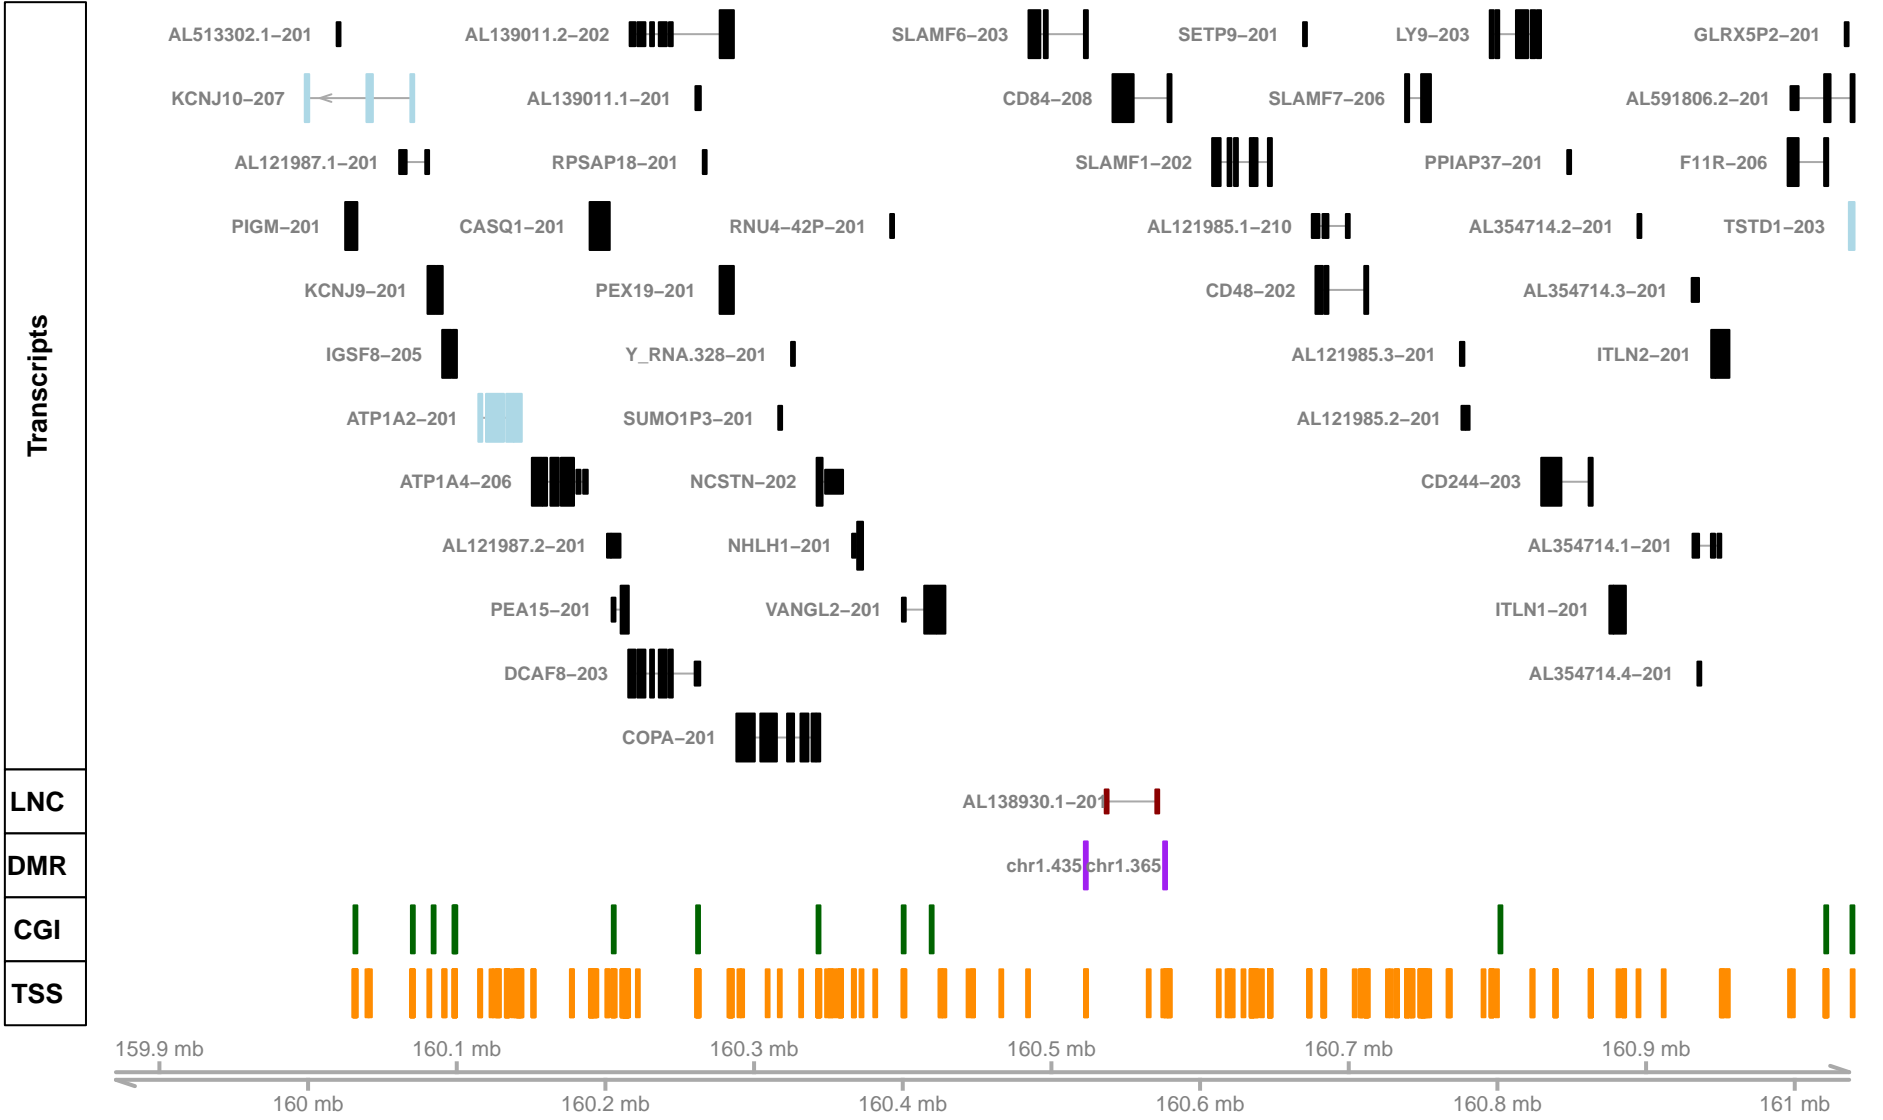

chr1.435

chr1.365

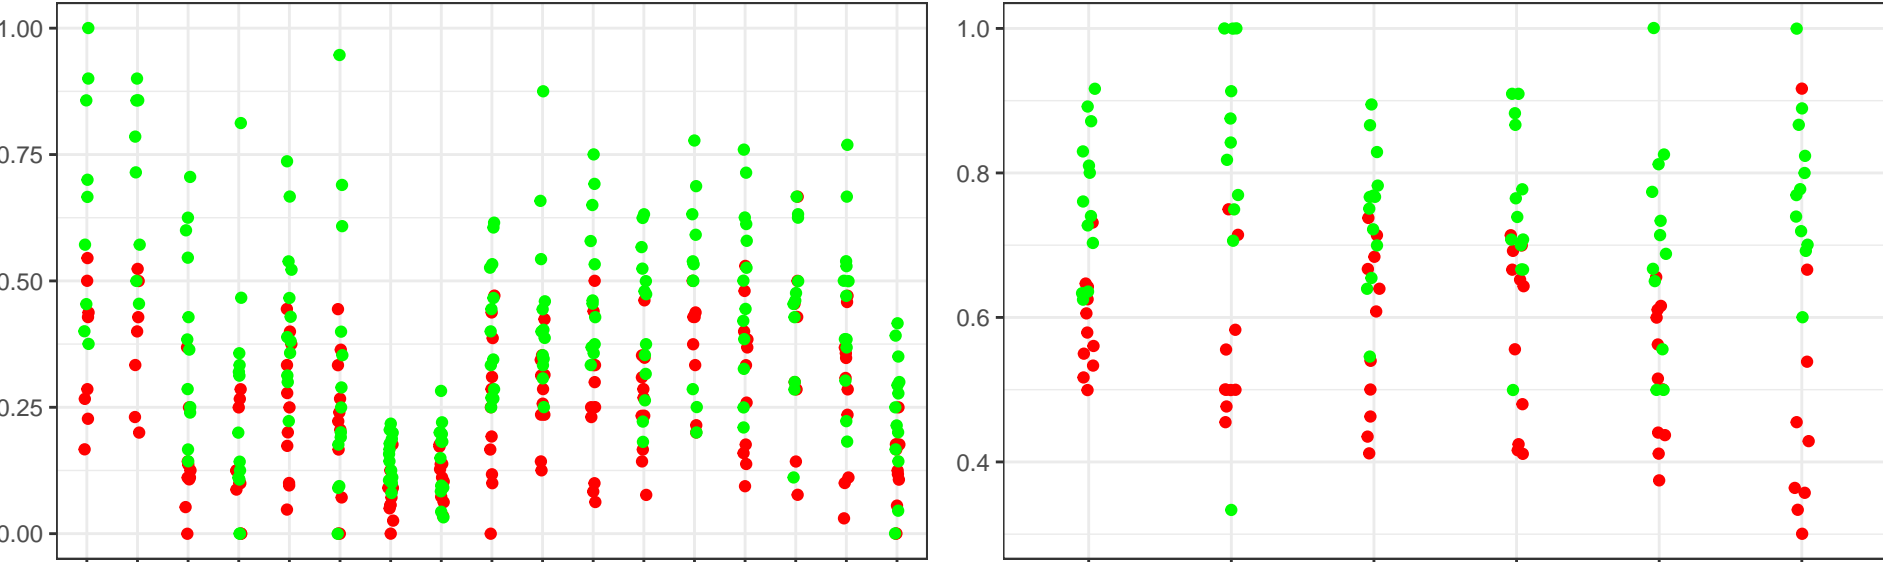

AL157402.2

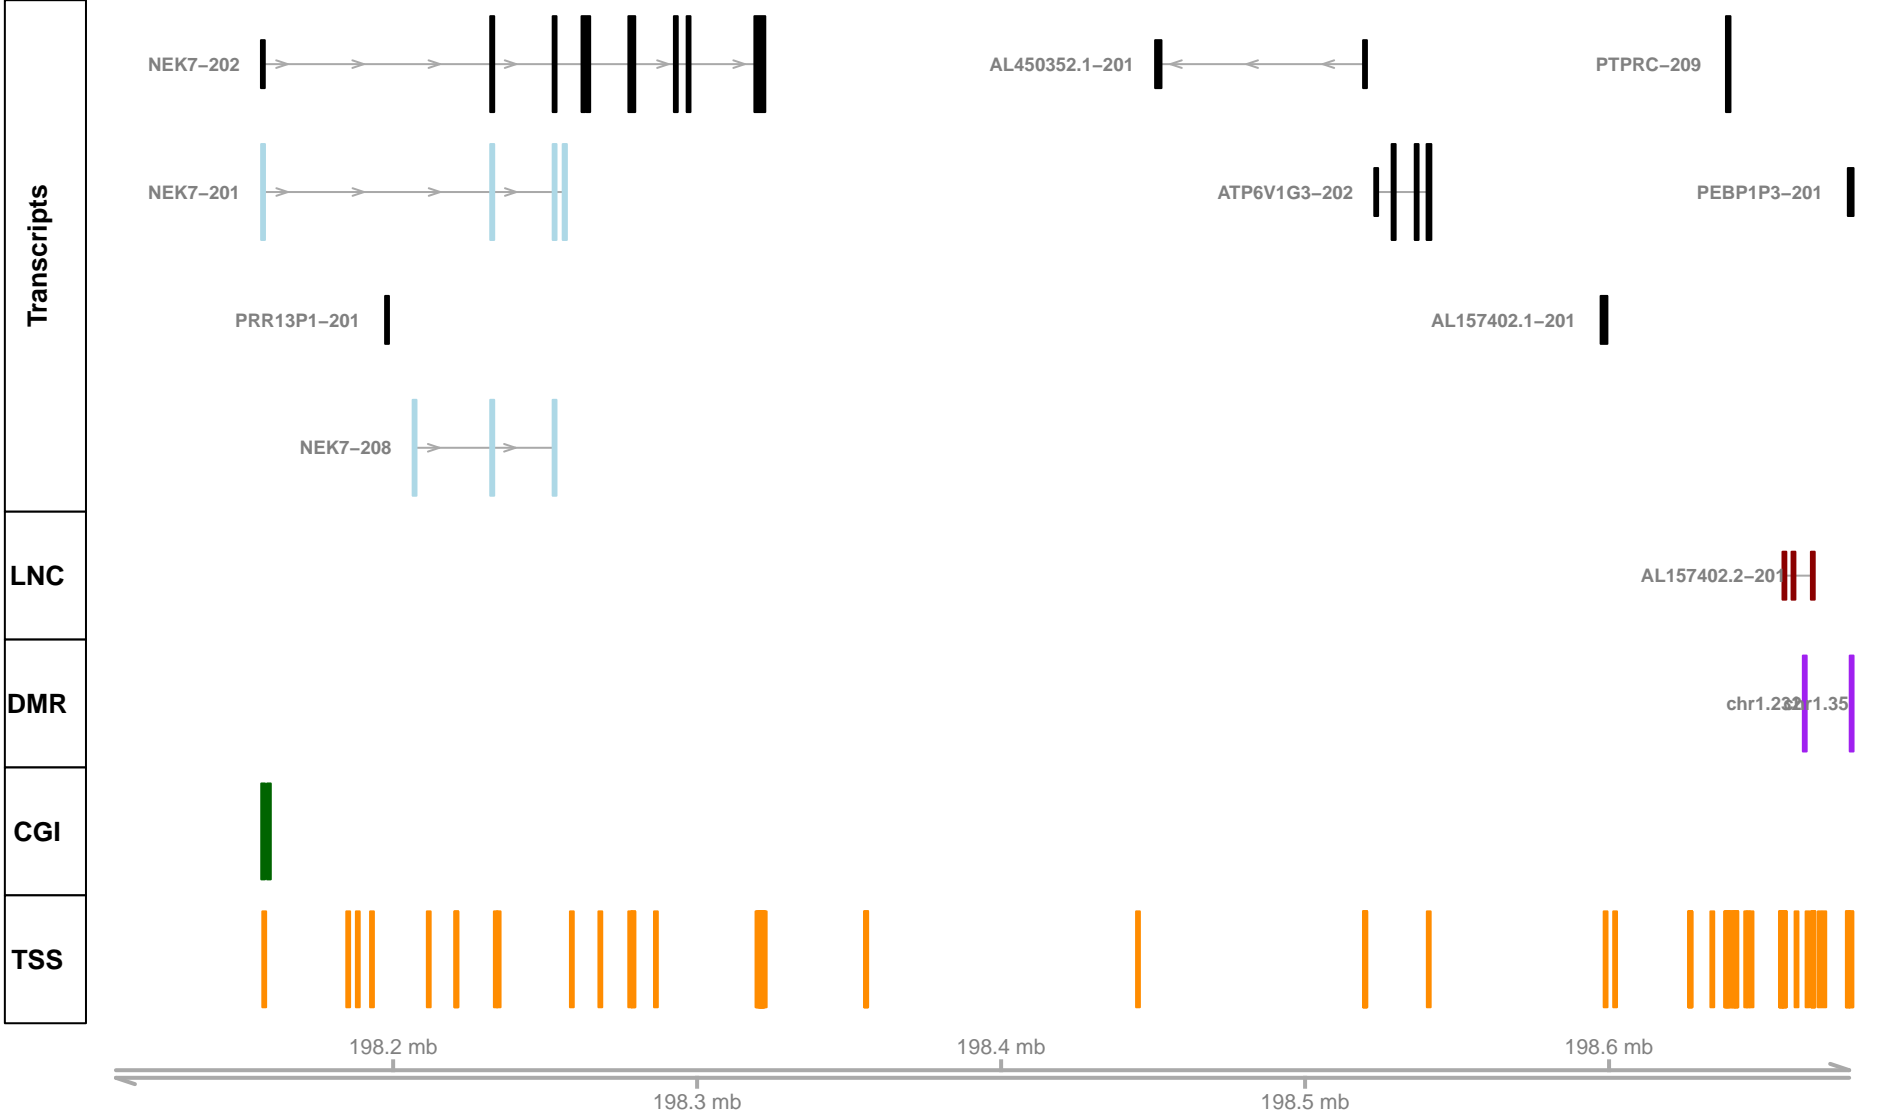

chr1.232

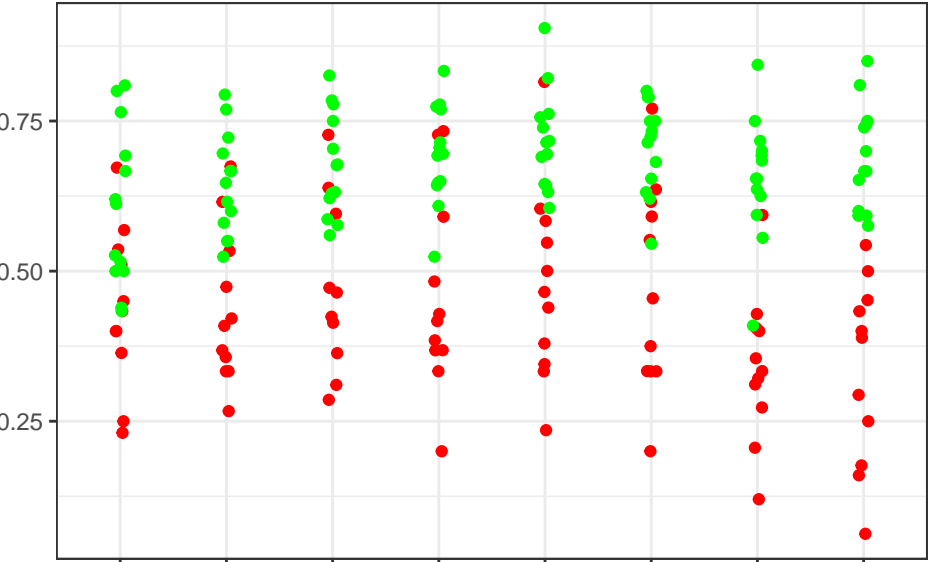

chr1.35

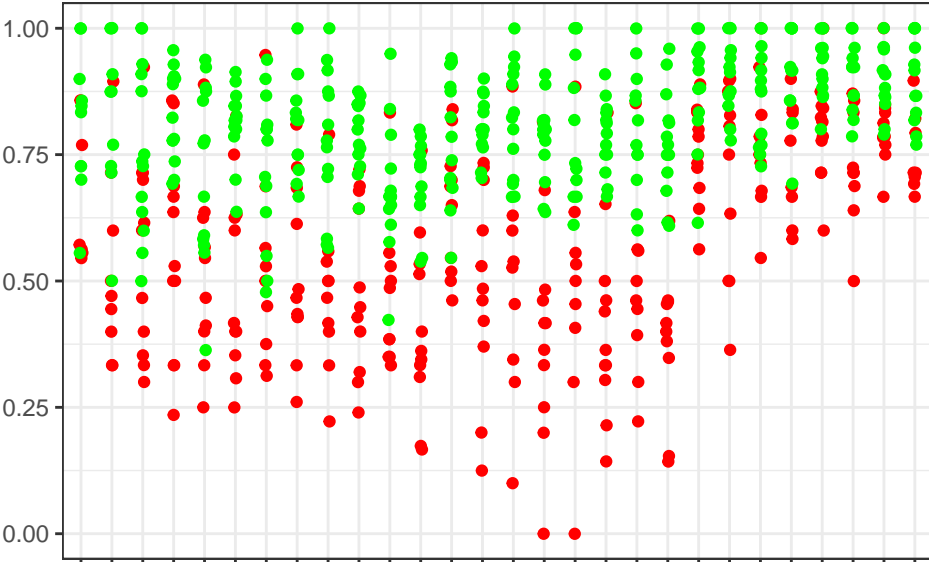

AL157955.1

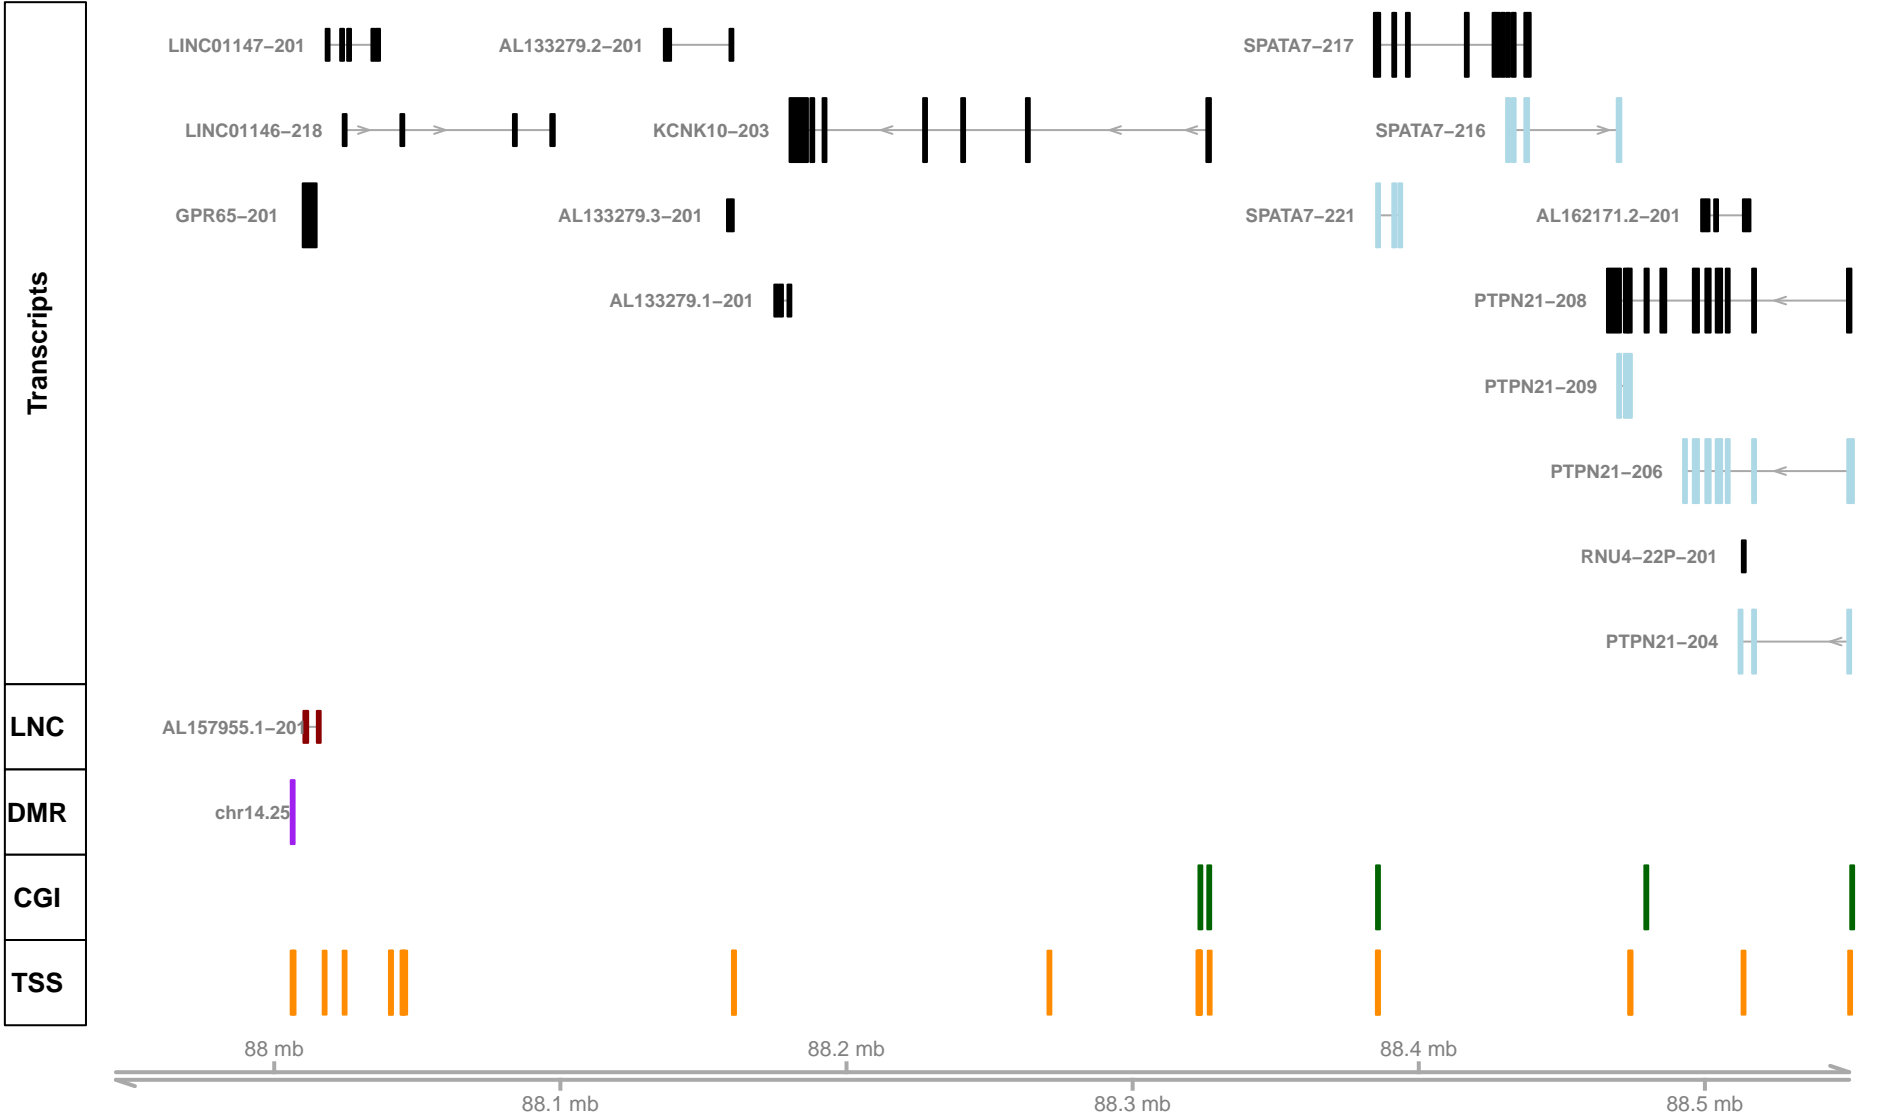

chr14.25

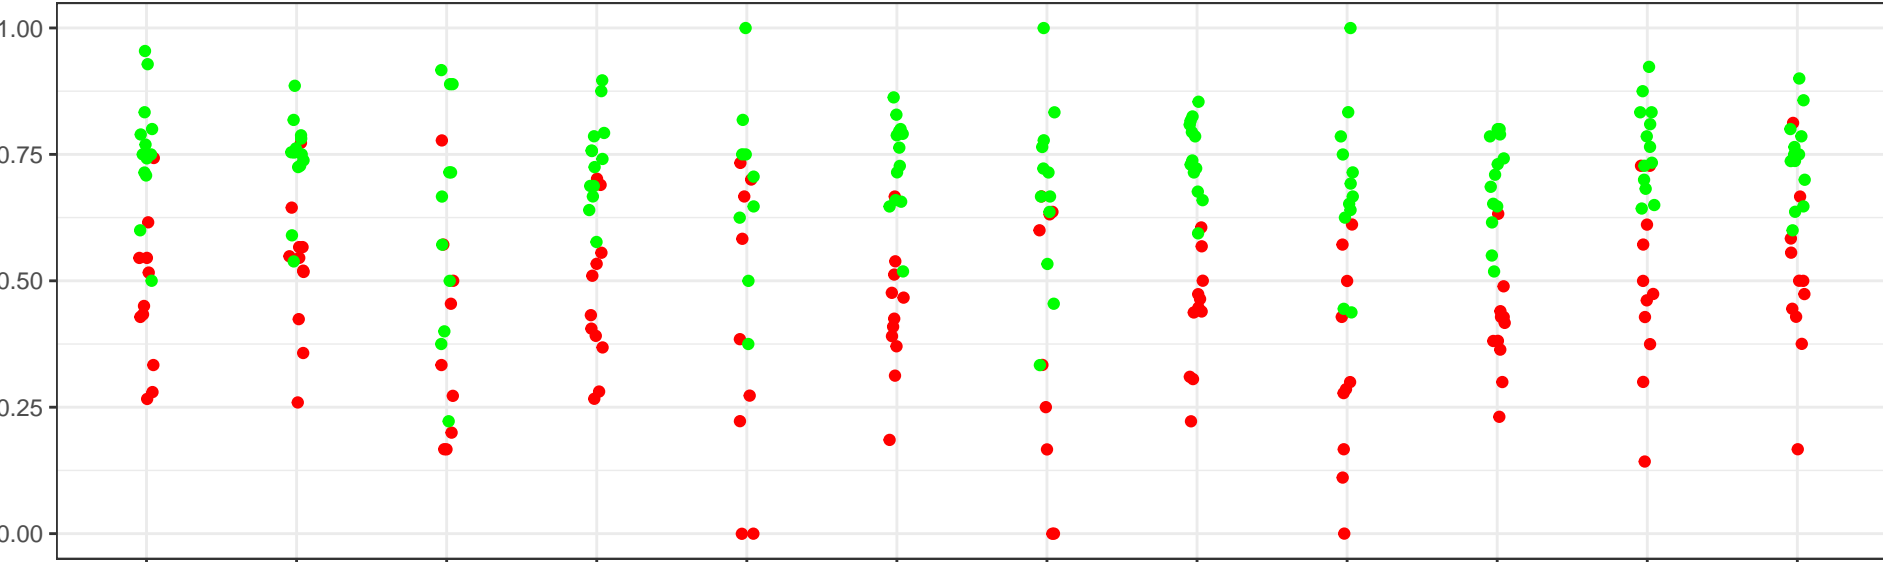

AL160400.1

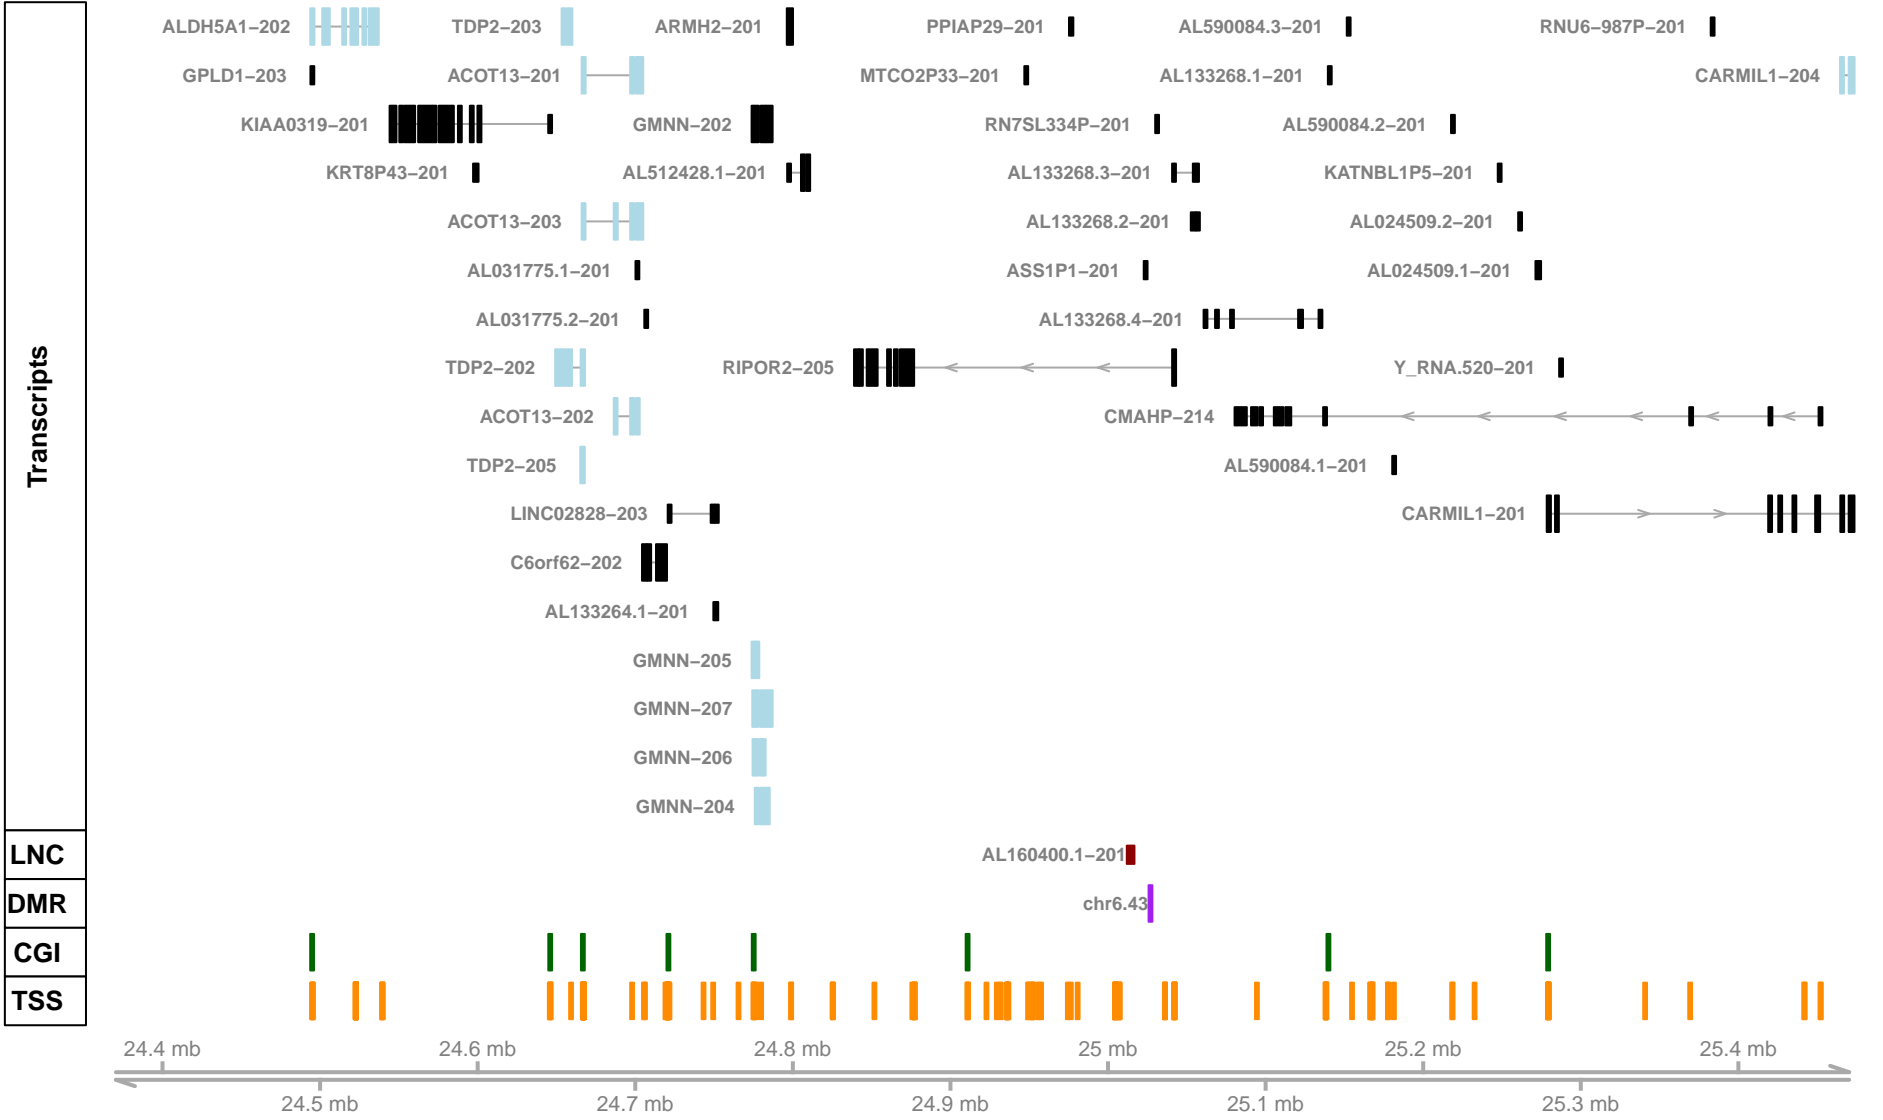

chr6.43

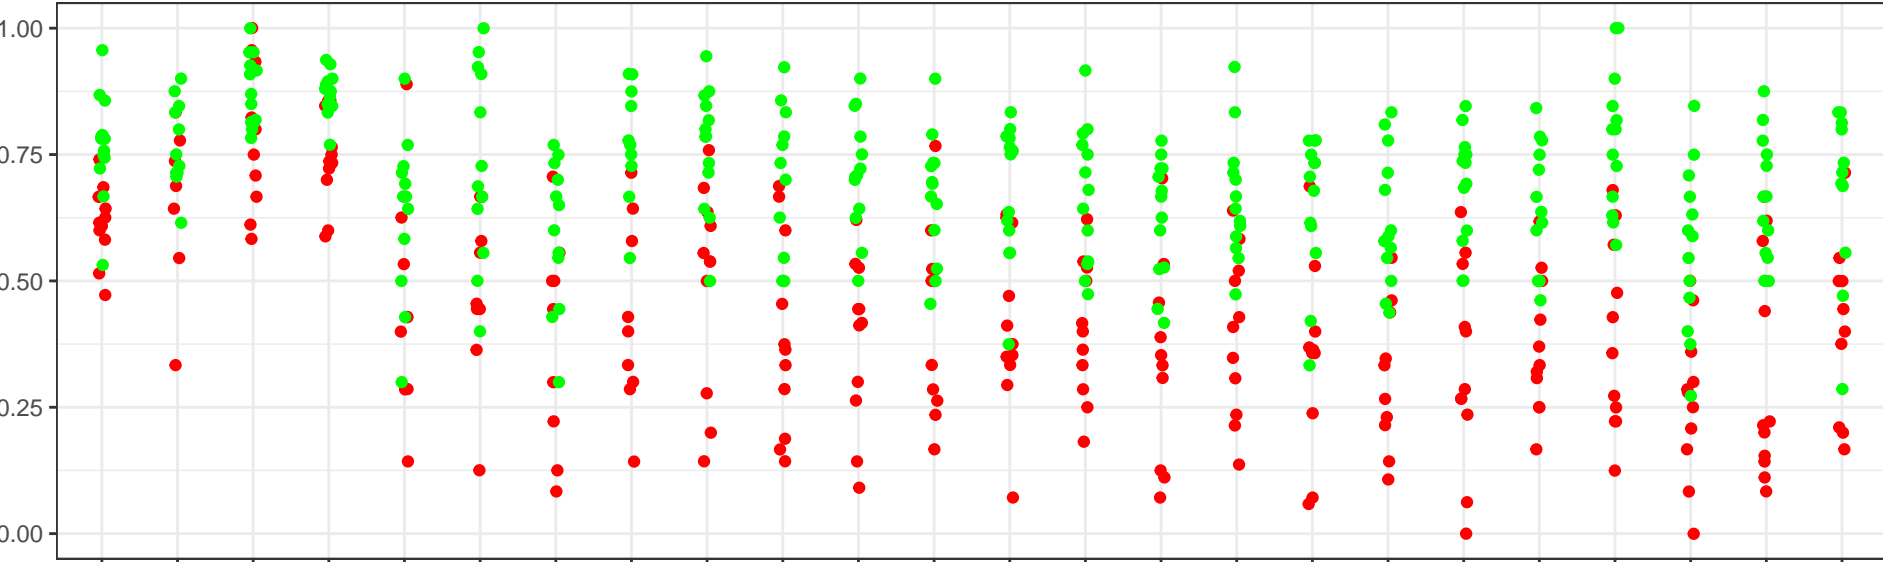

# AL161668.3

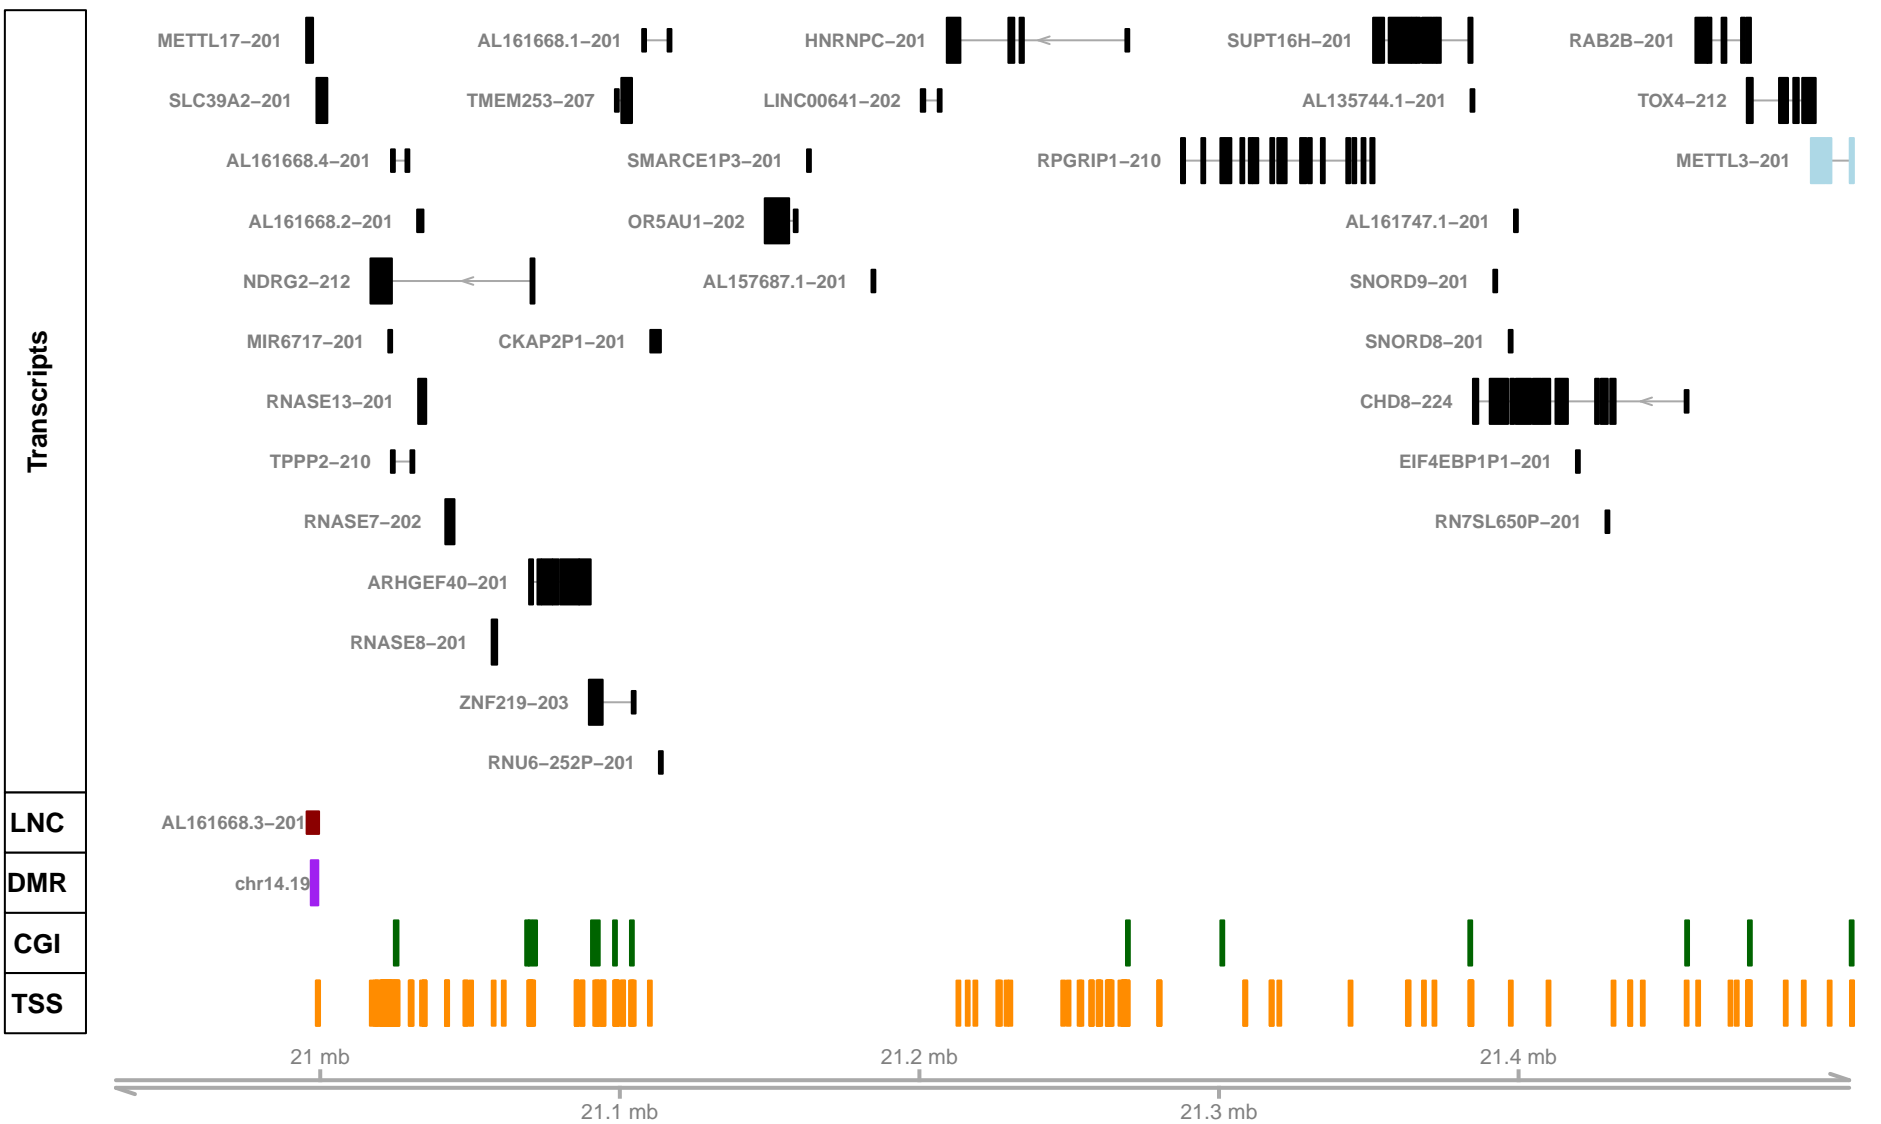

## chr14.19

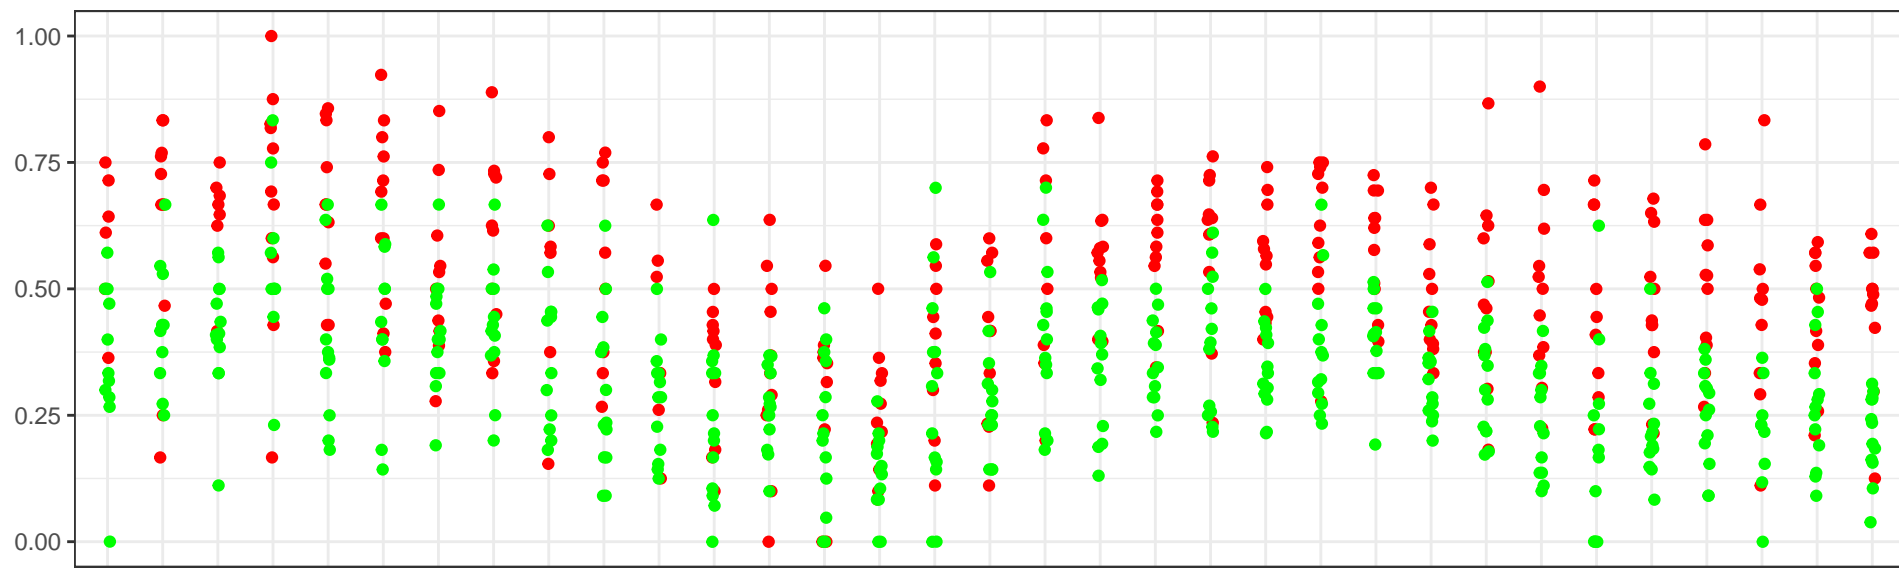

AL355388.2

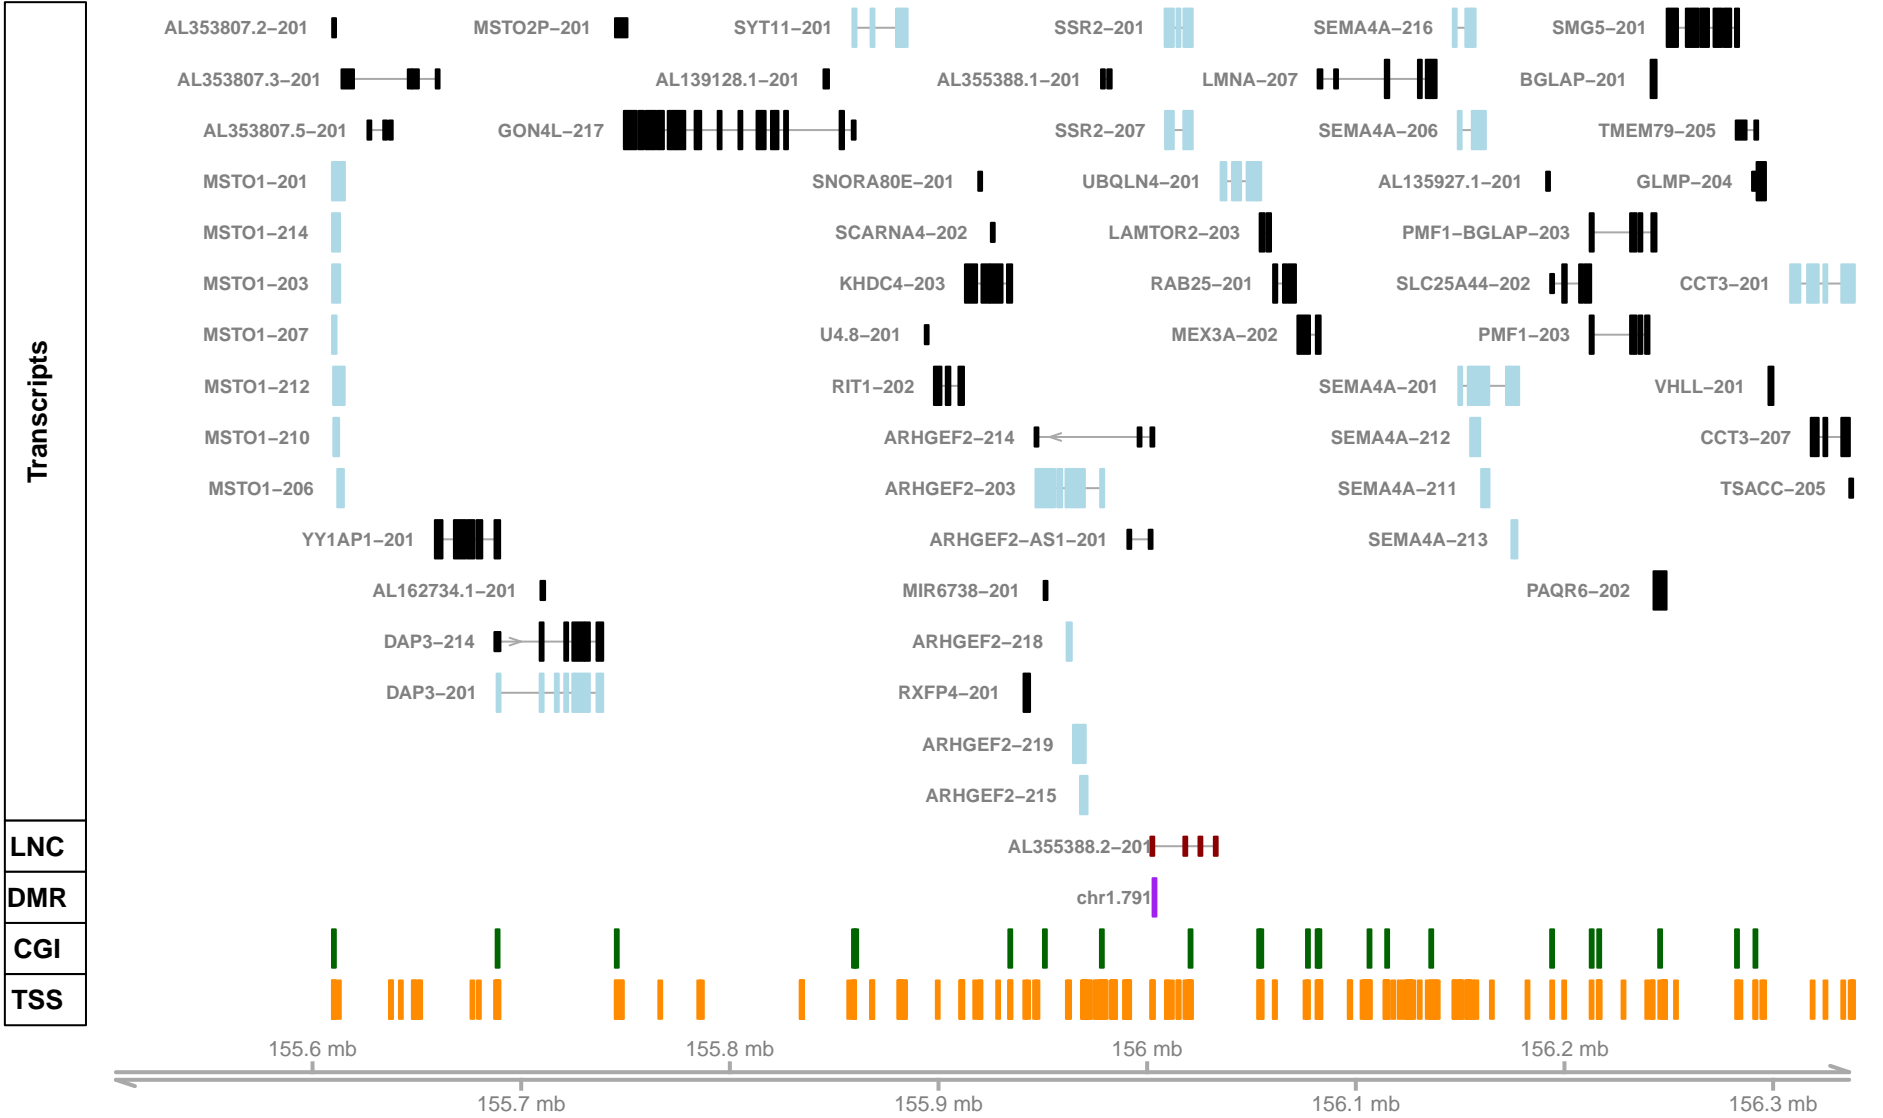

chr1.791

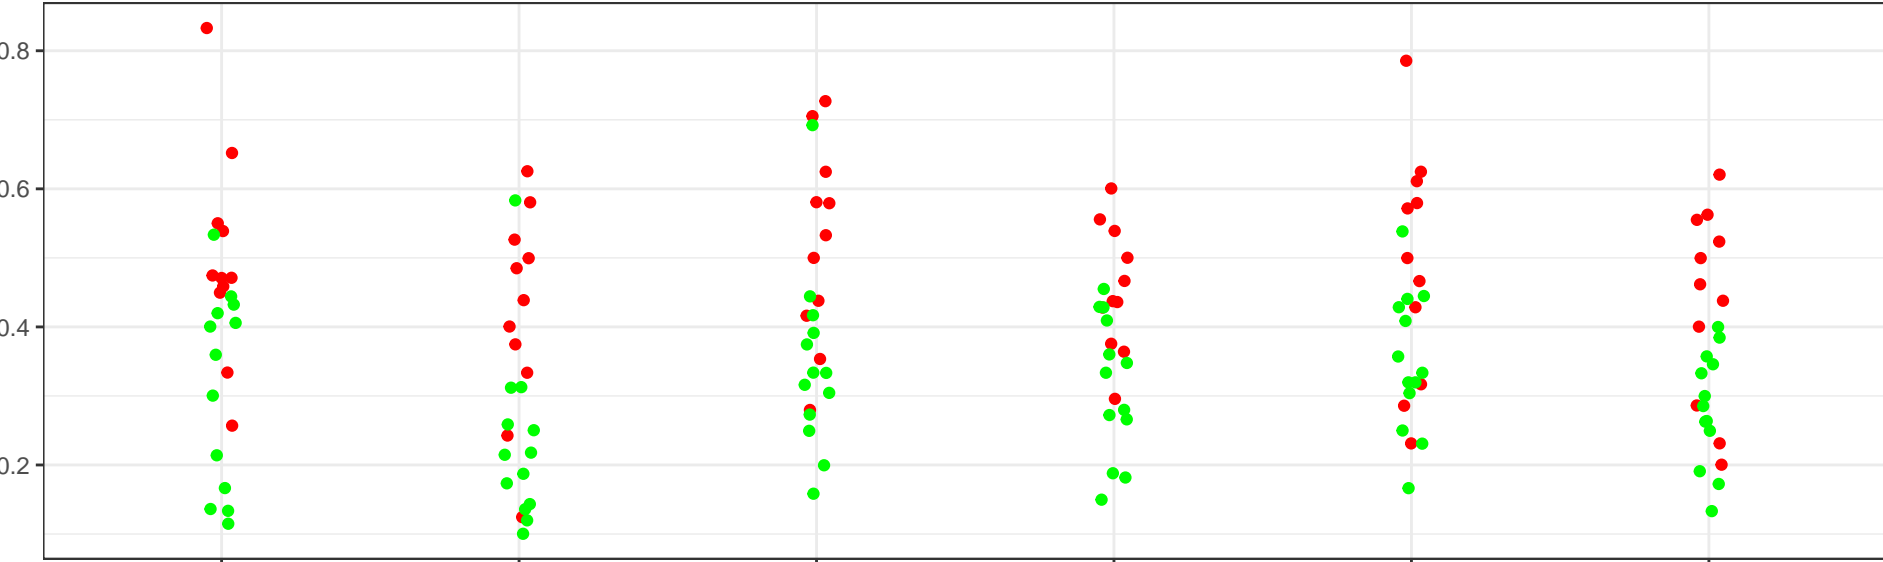

AL357033.2

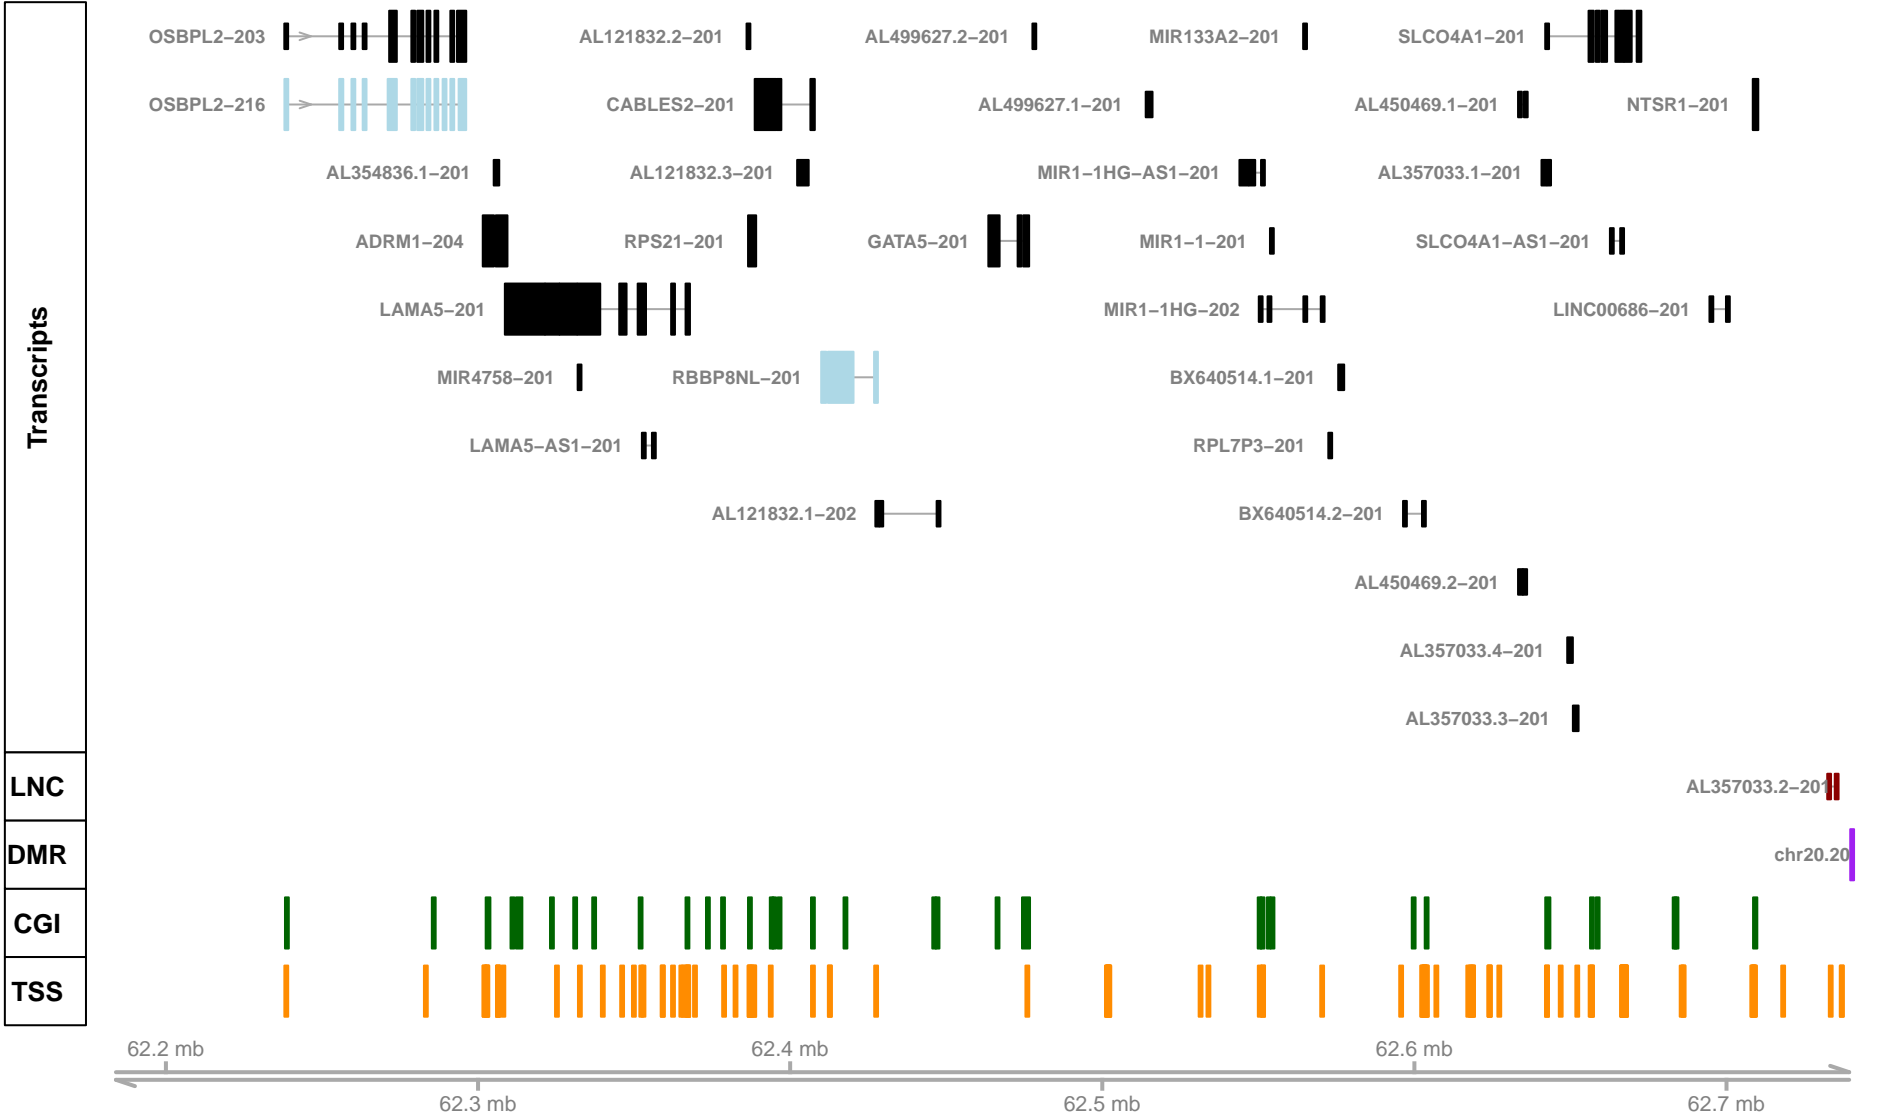

chr20.20

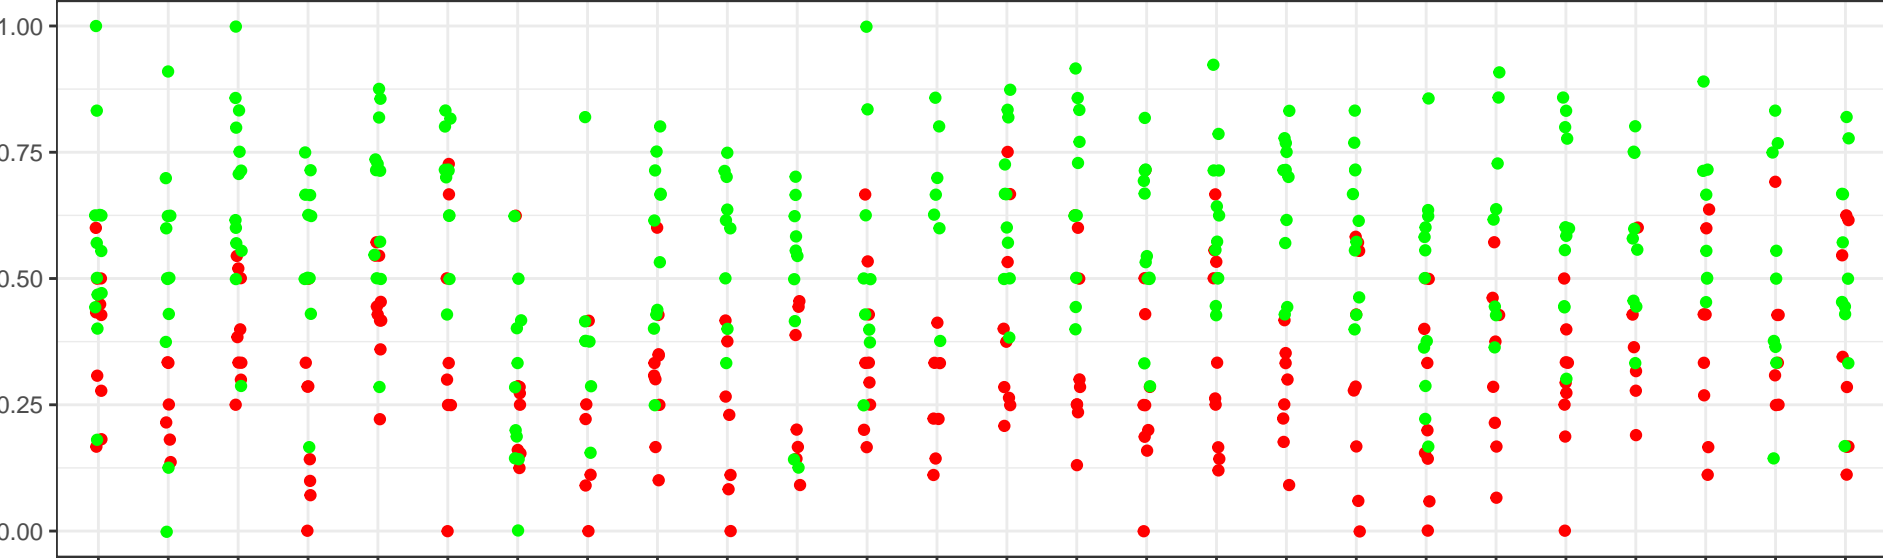

AL359962.3

Transcripts

LNC

DMR

CGI

TSS

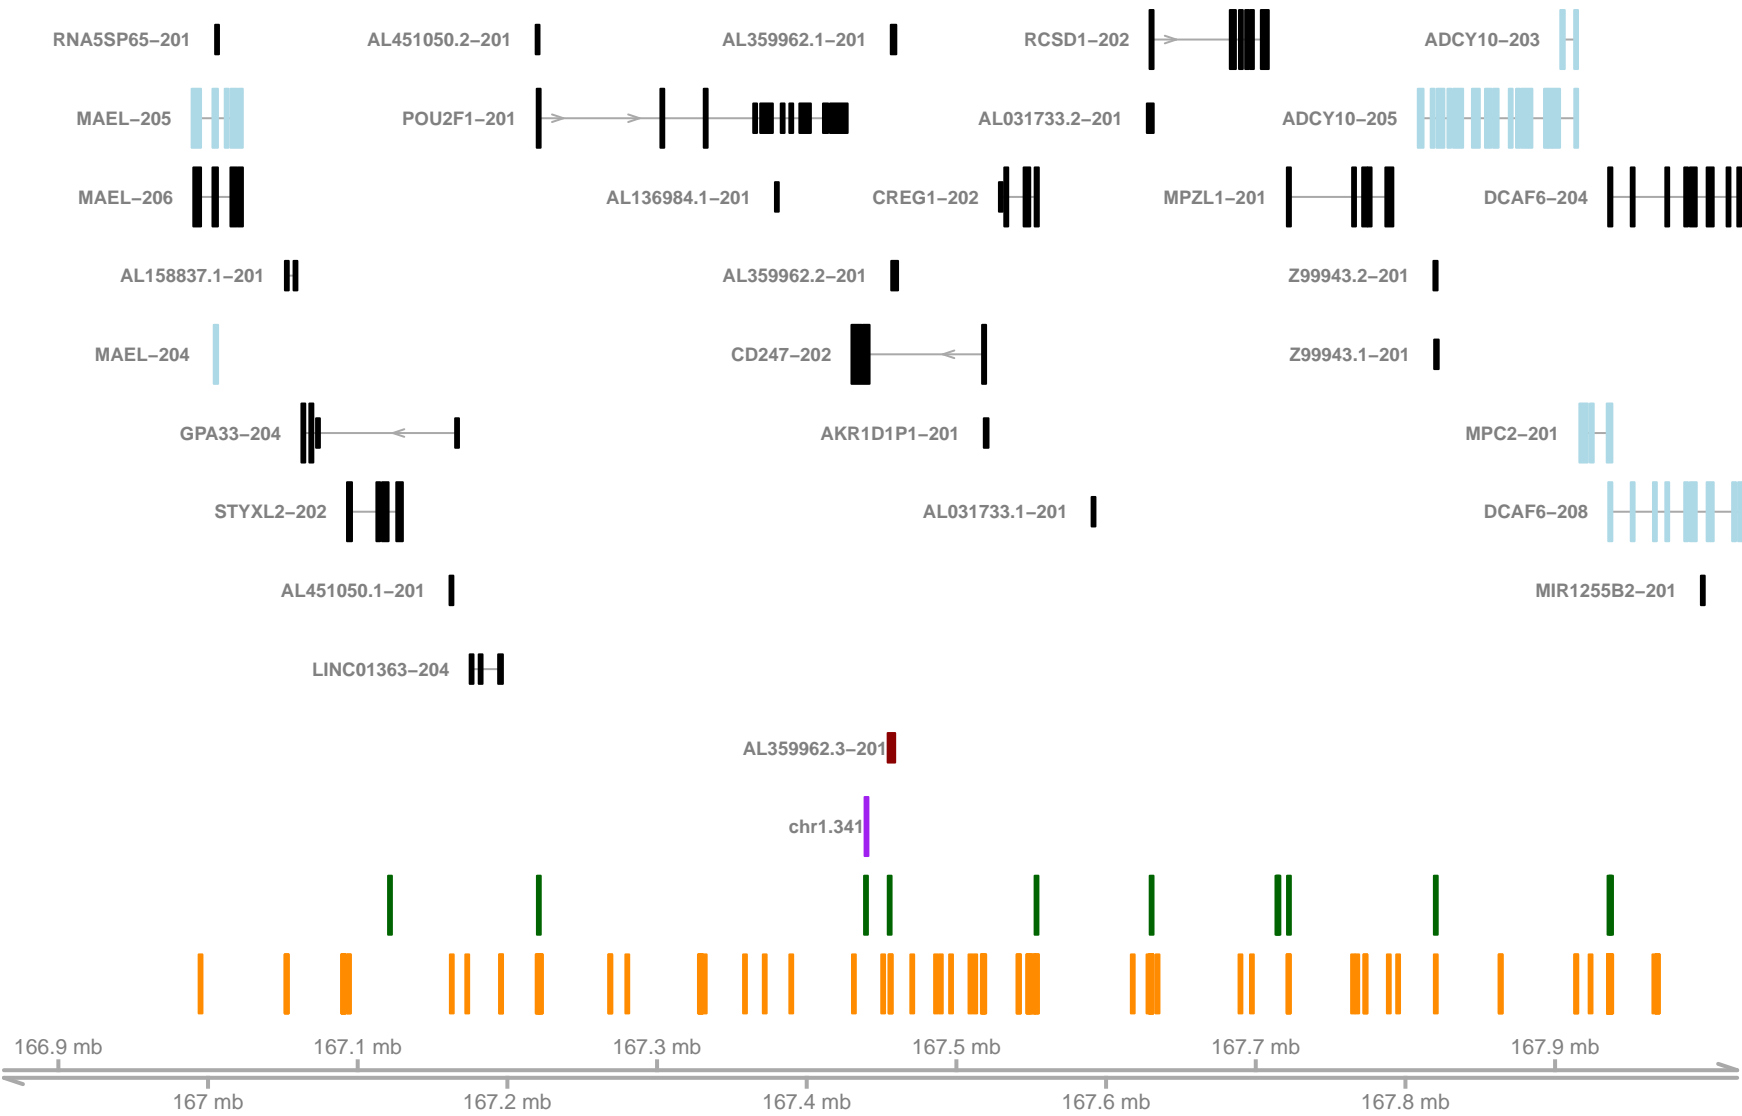

chr1.341

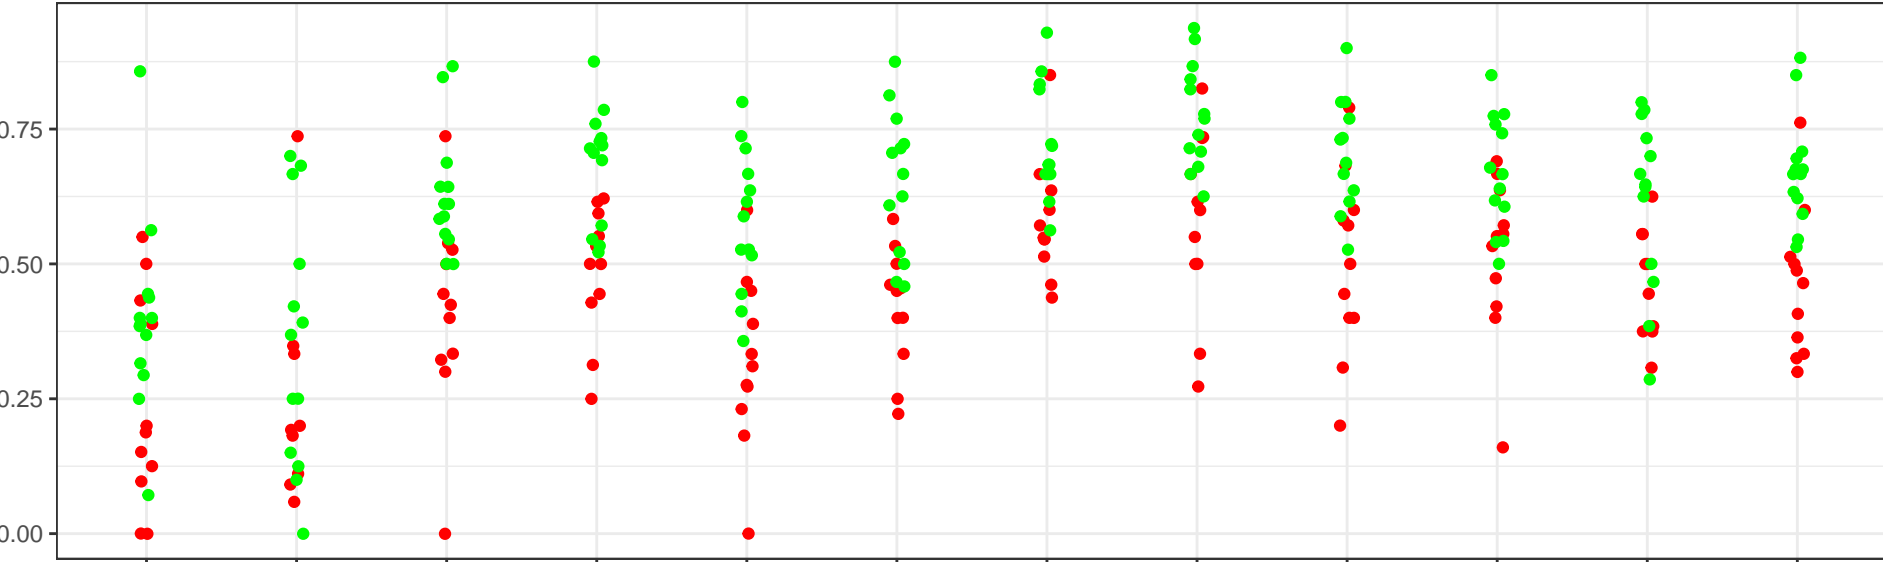

# AL365361.1

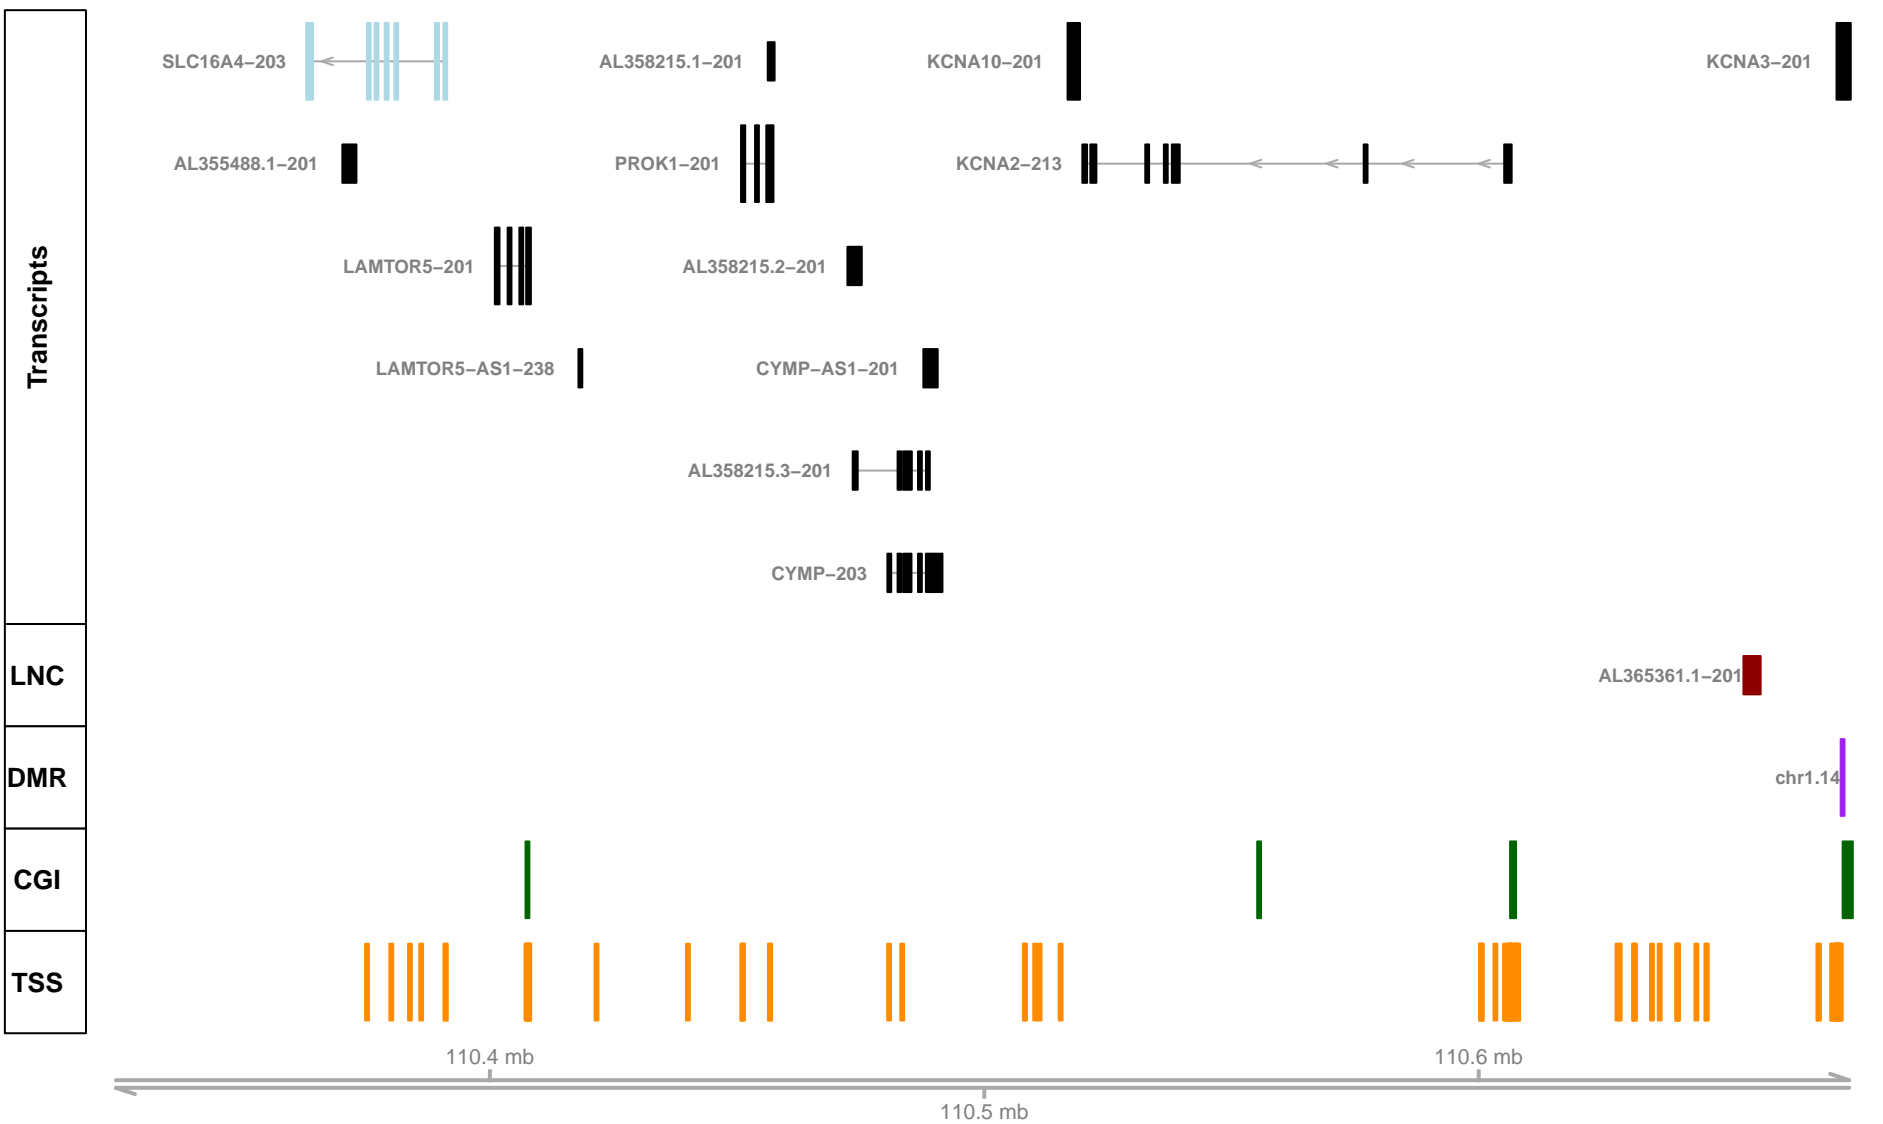

## chr1.14

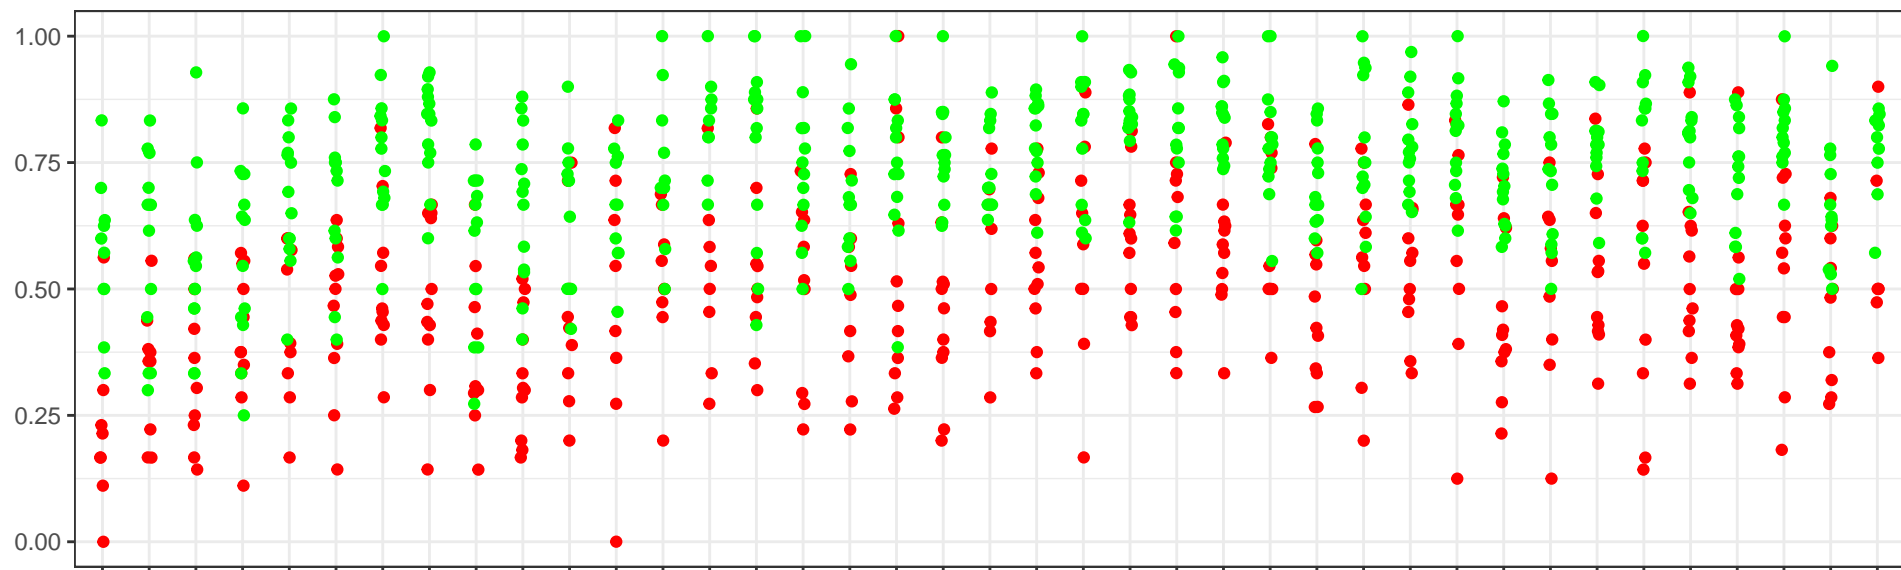

AL390208.1

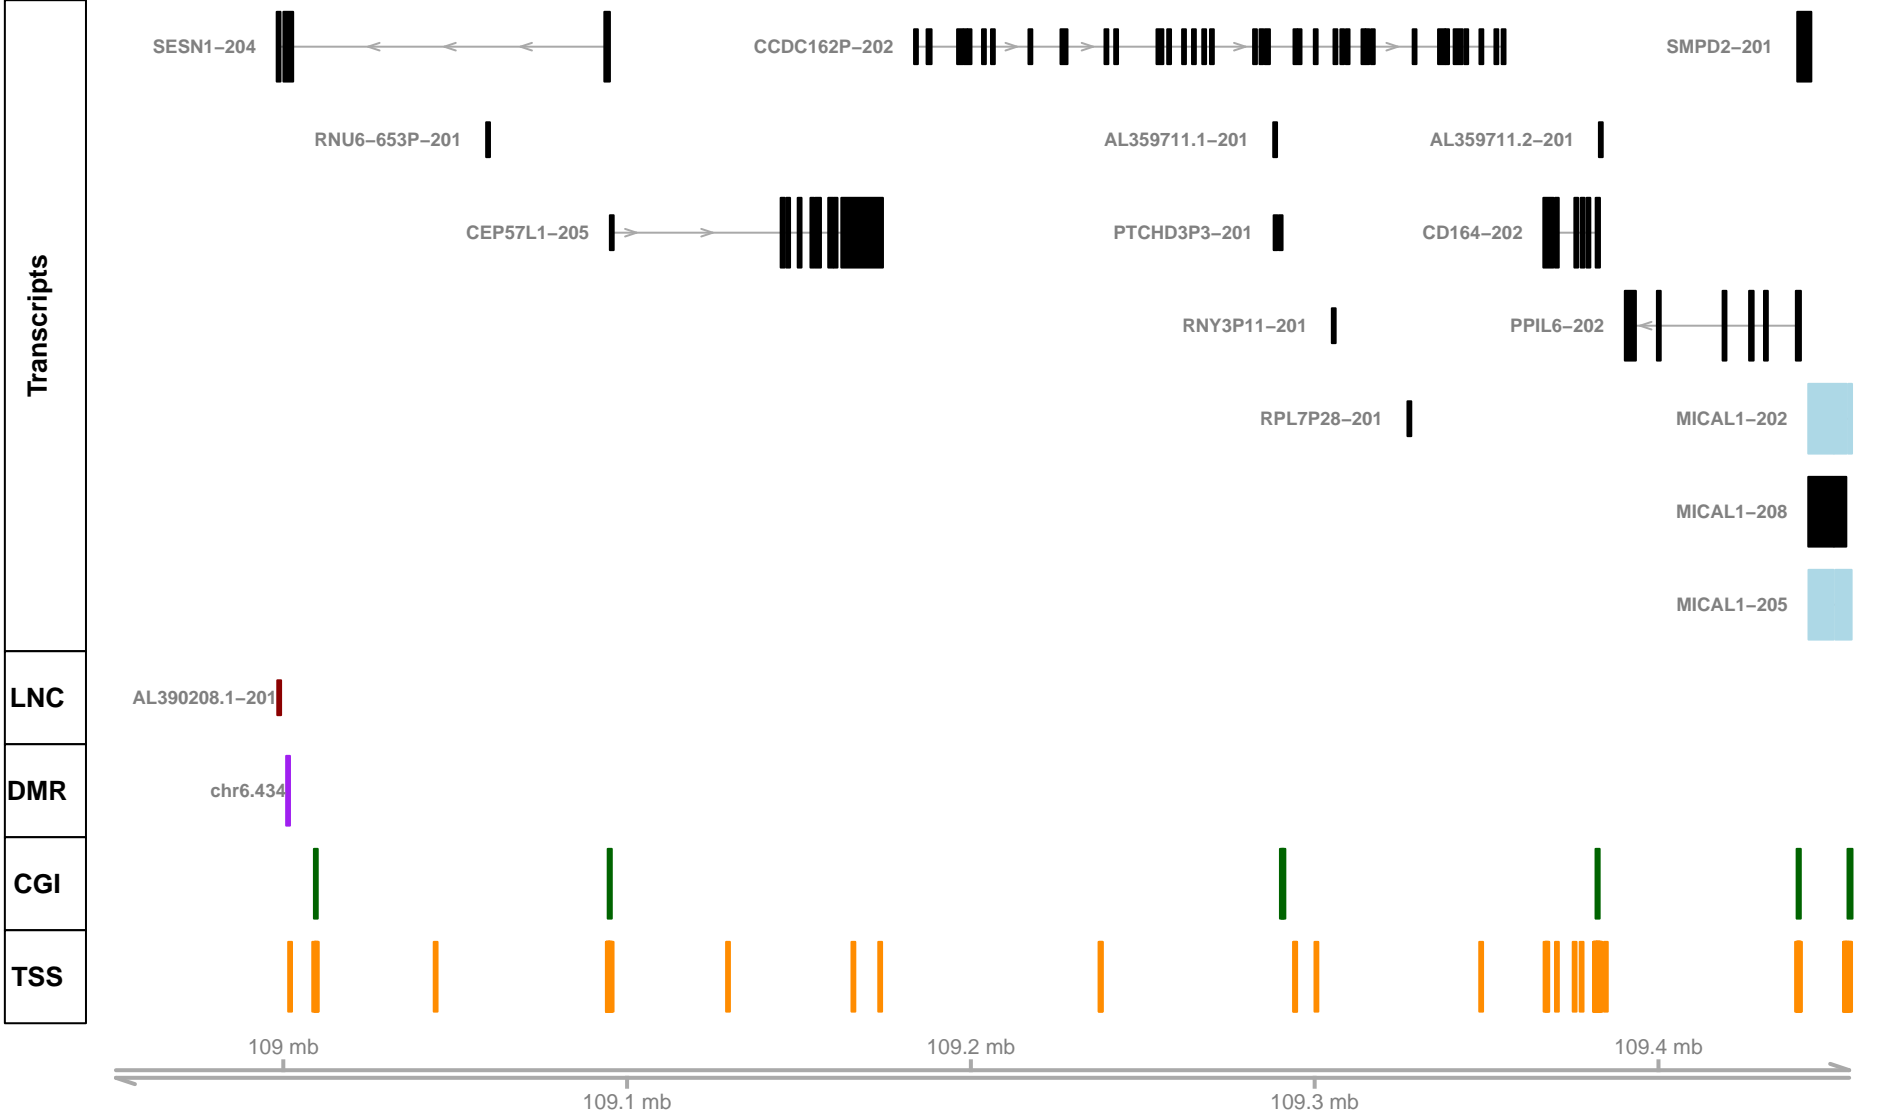

chr6.434

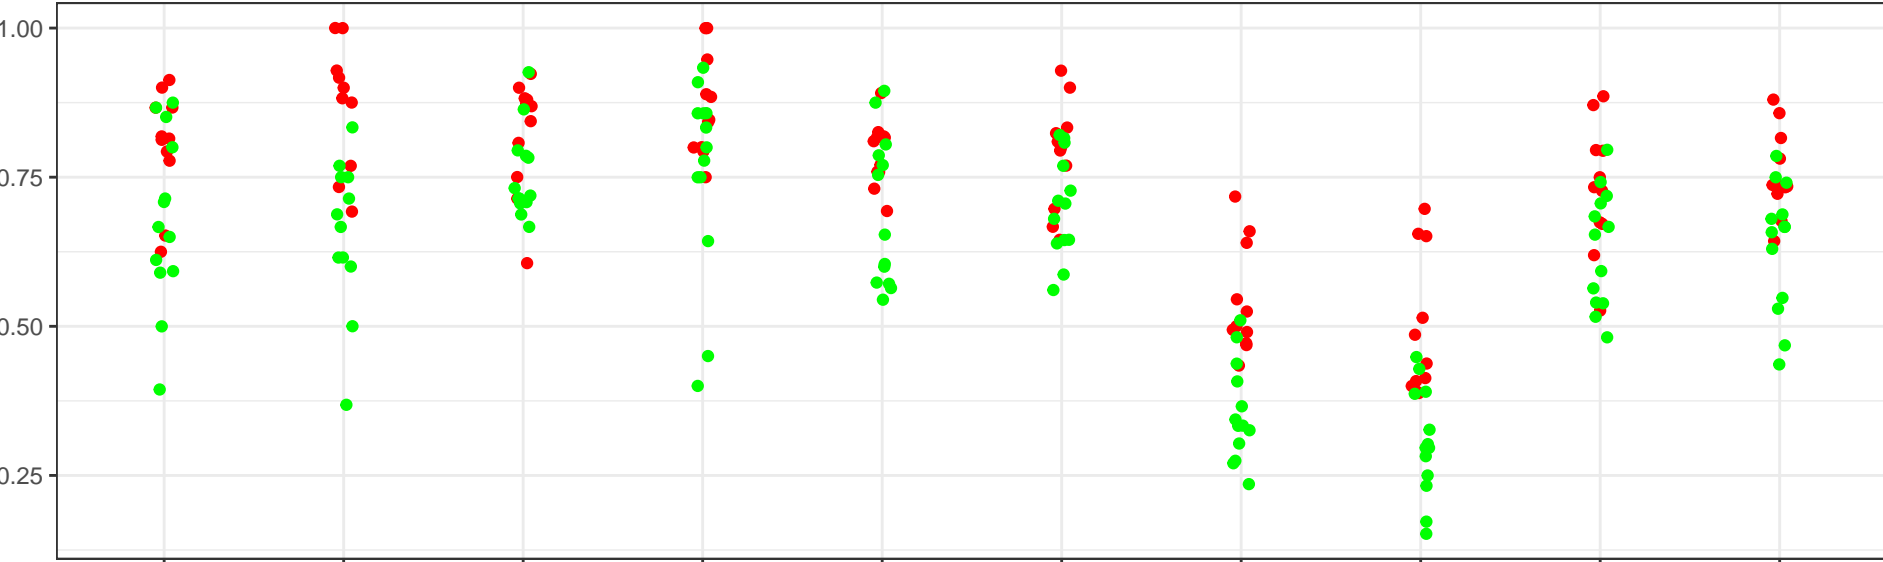

AL391832.3

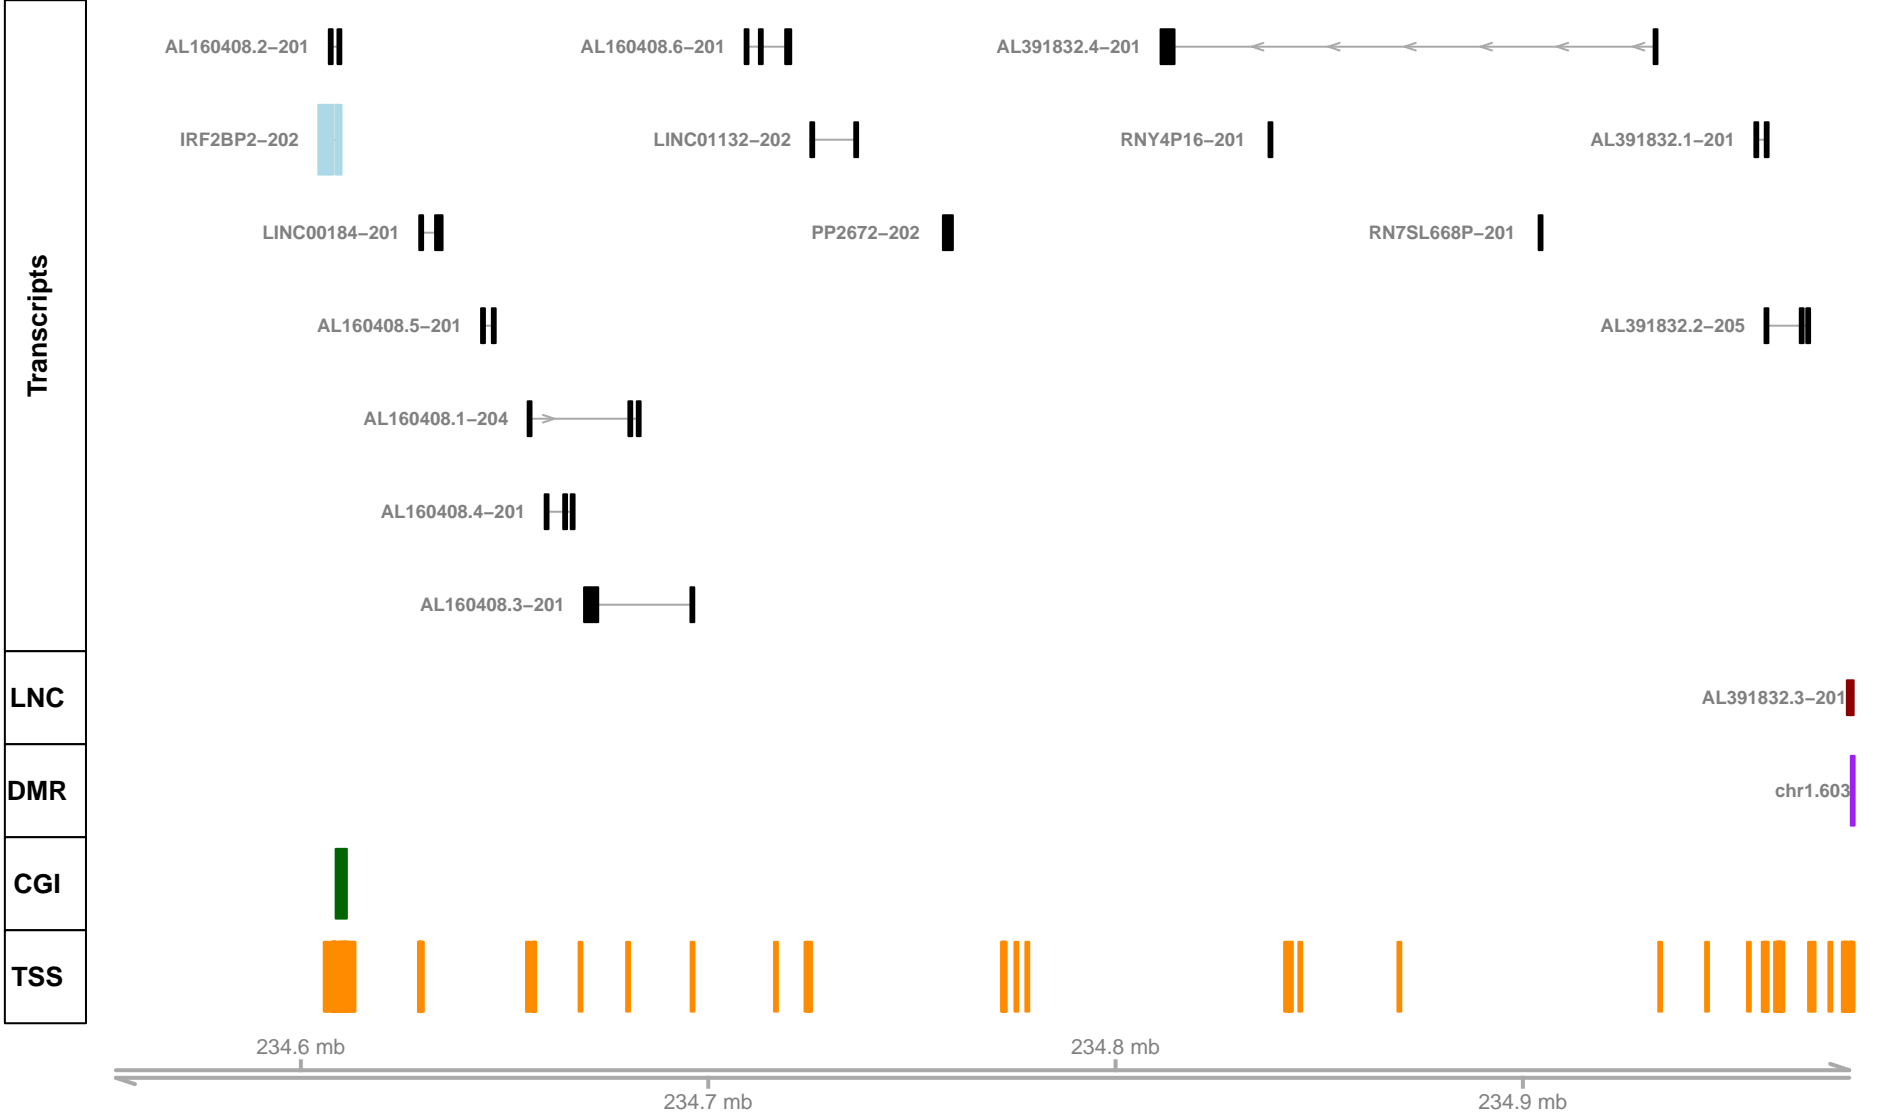

chr1.603

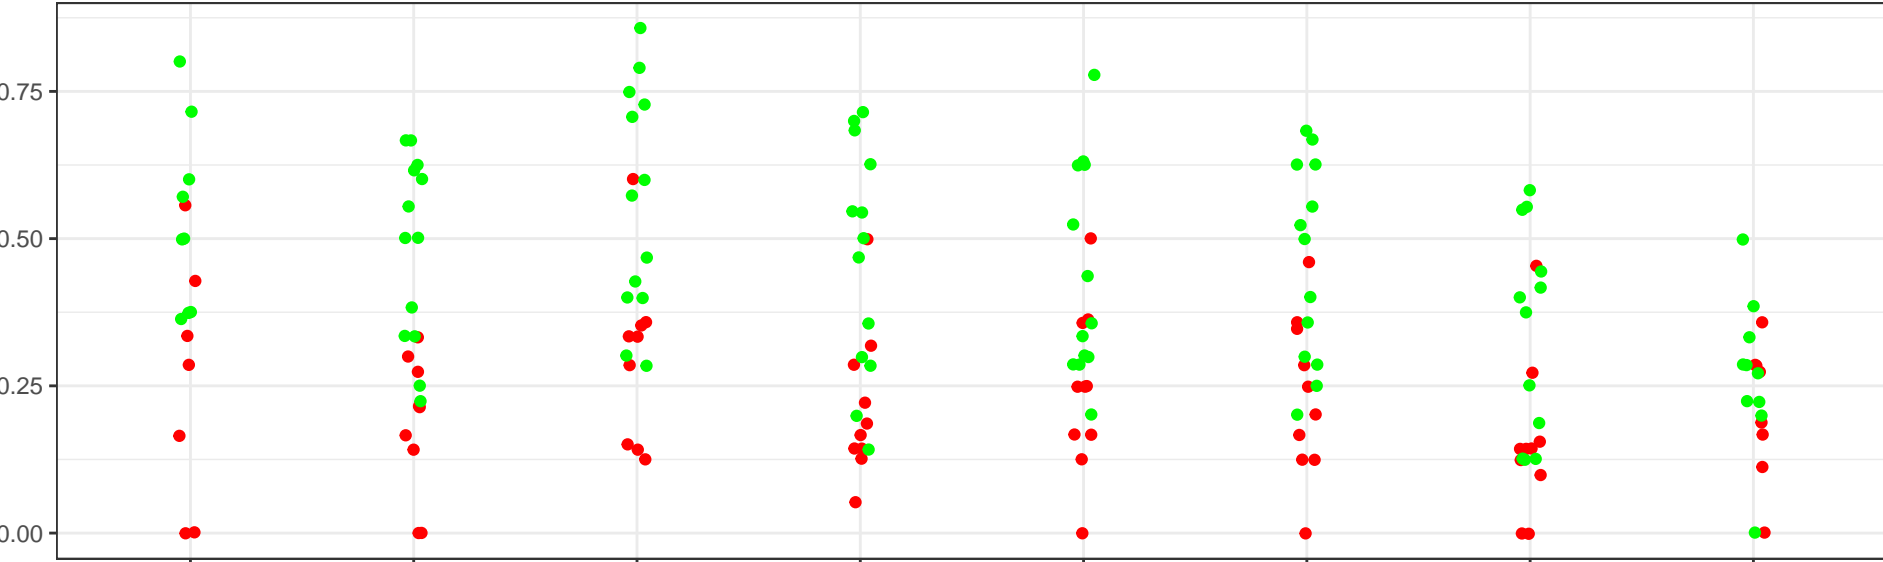

AL450352.1

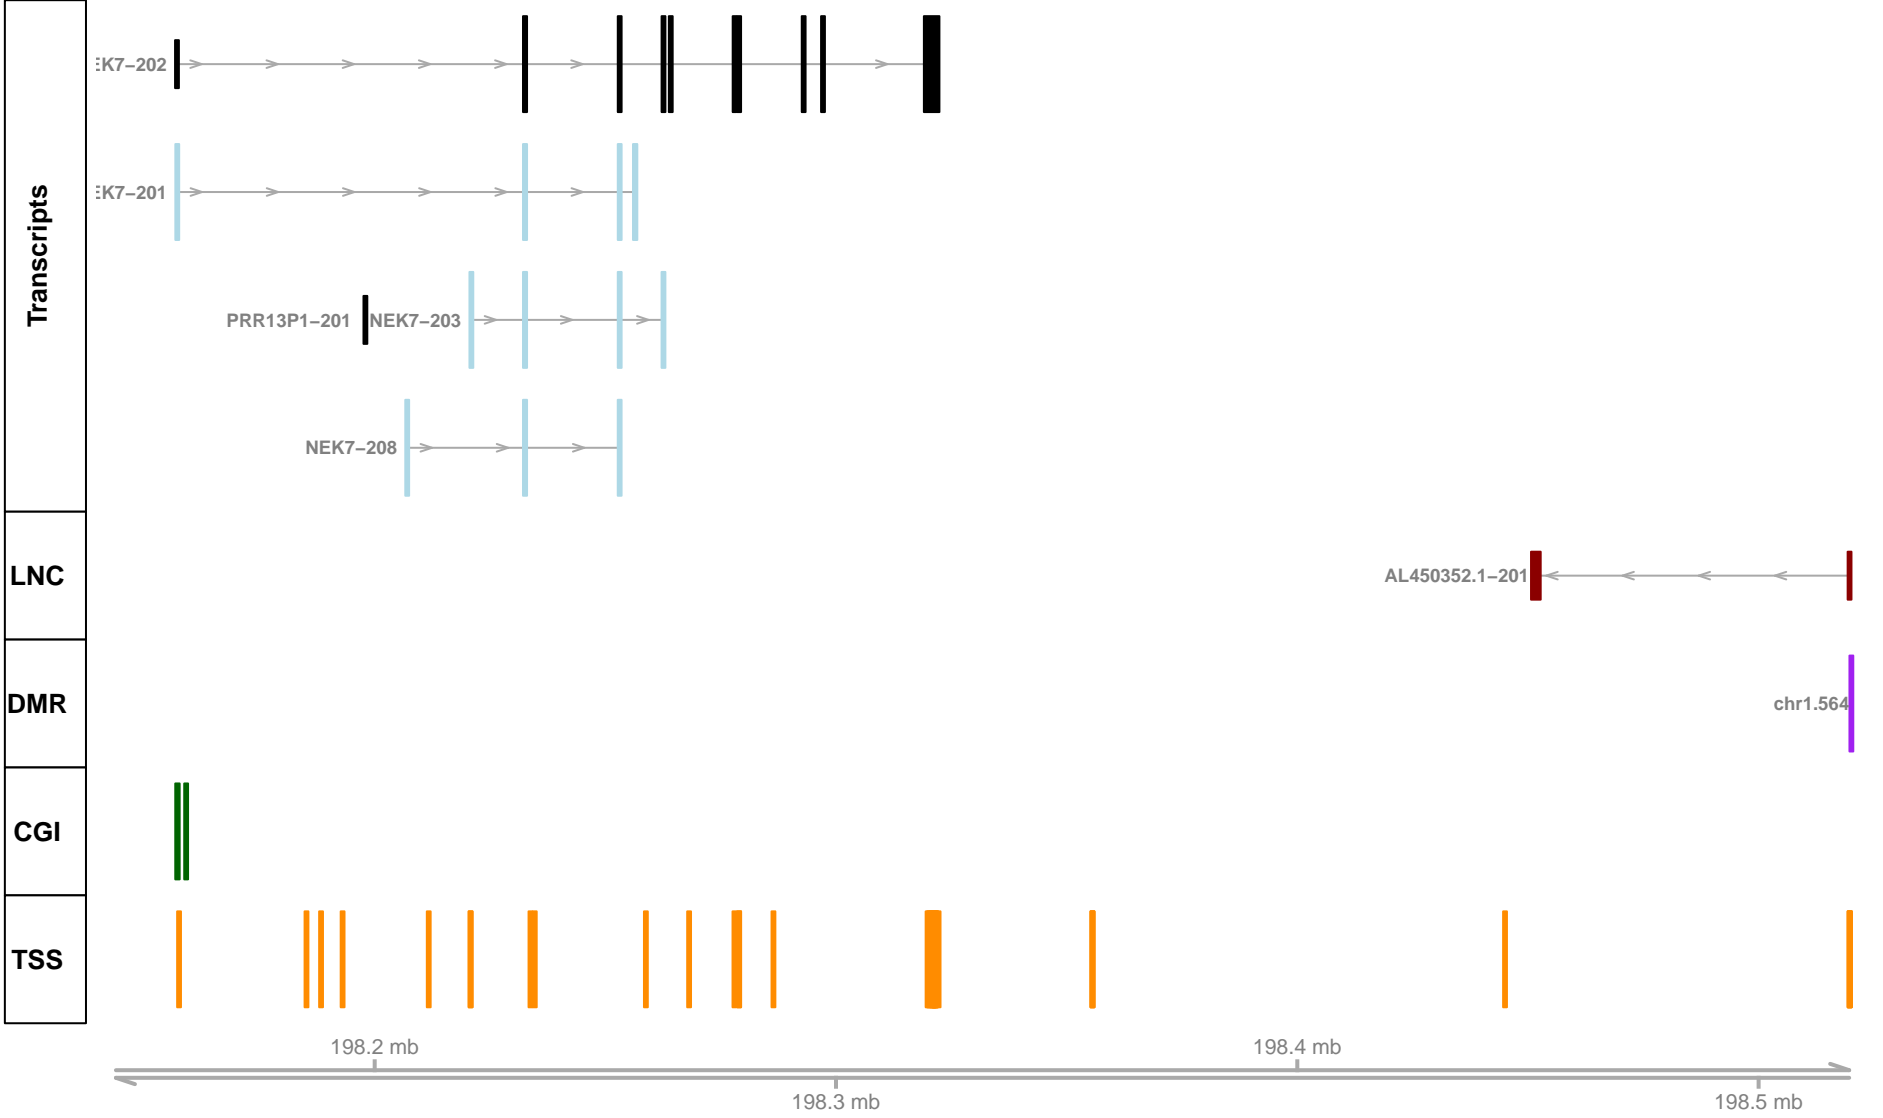

chr1.564

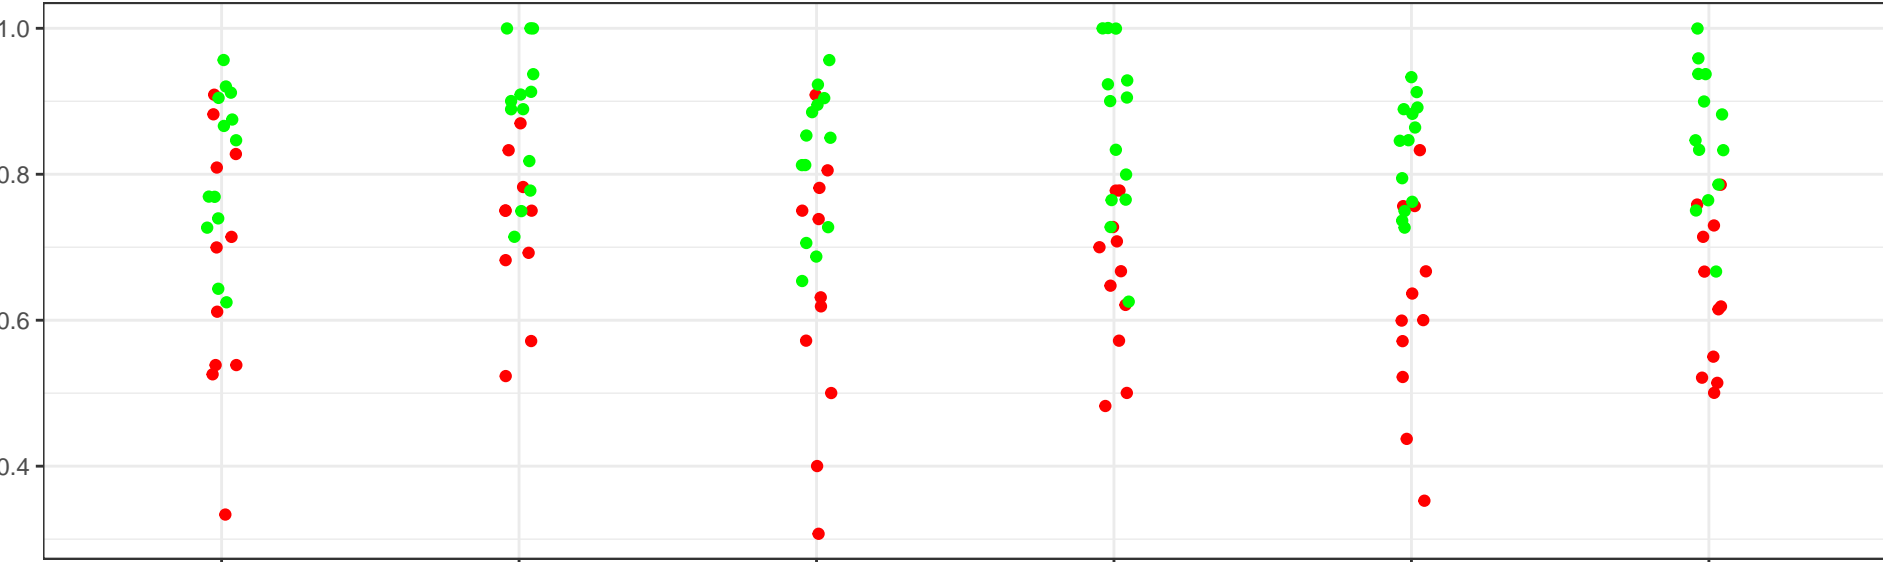

AL591518.1

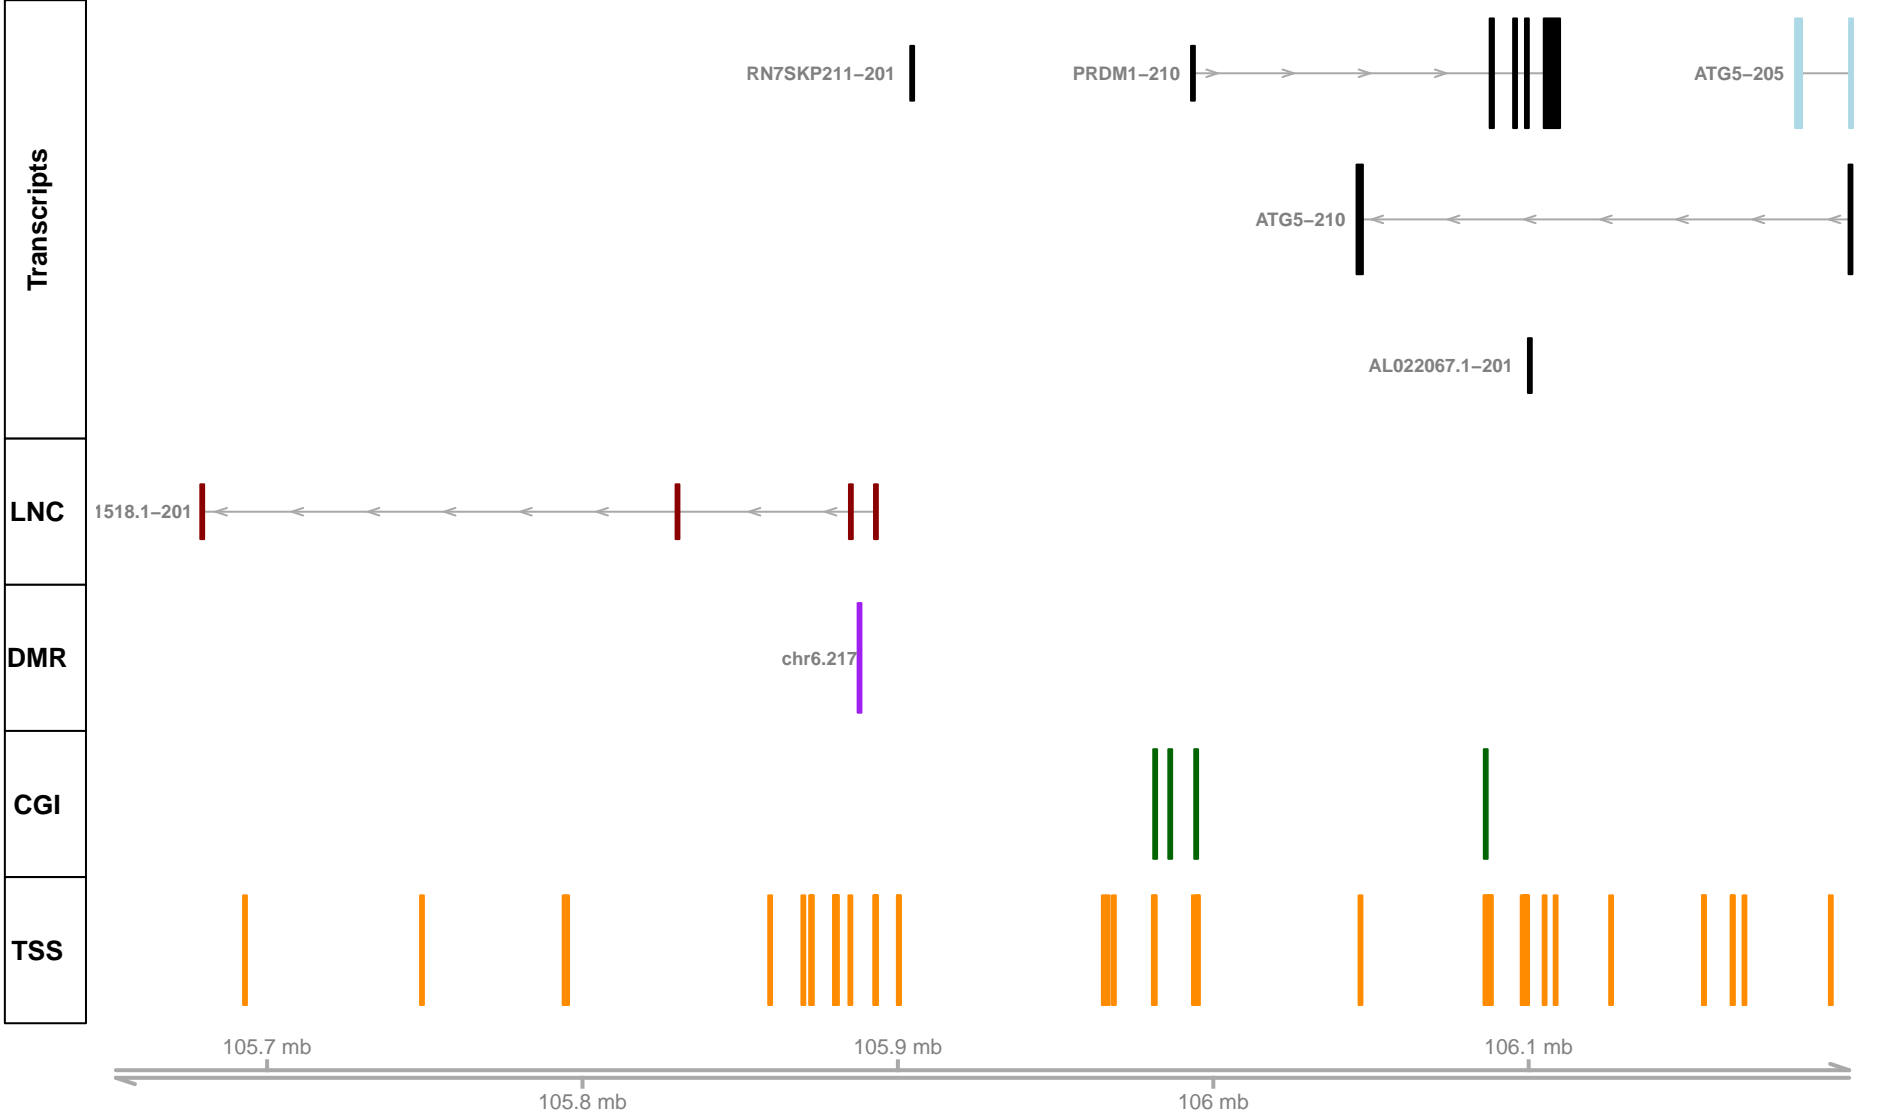

chr6.217

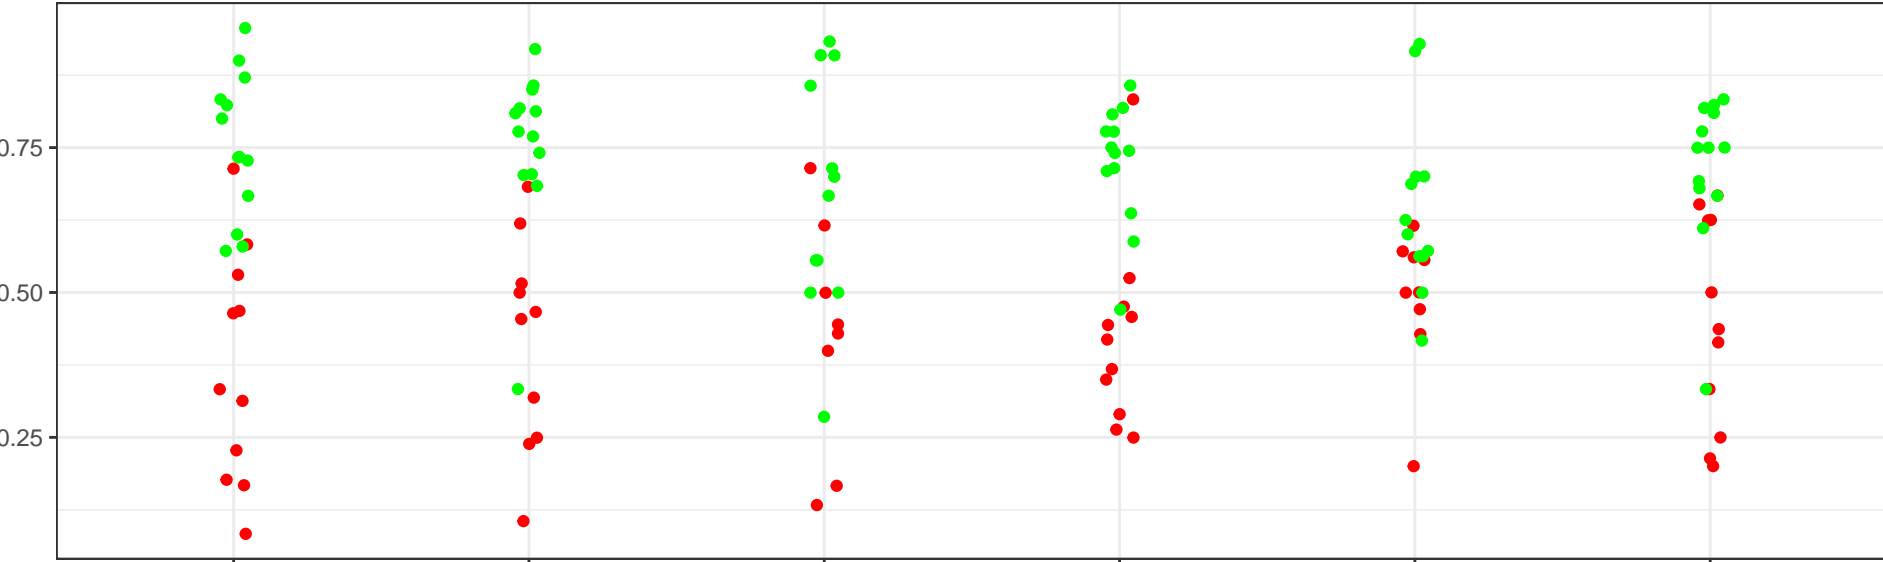

AL592295.4

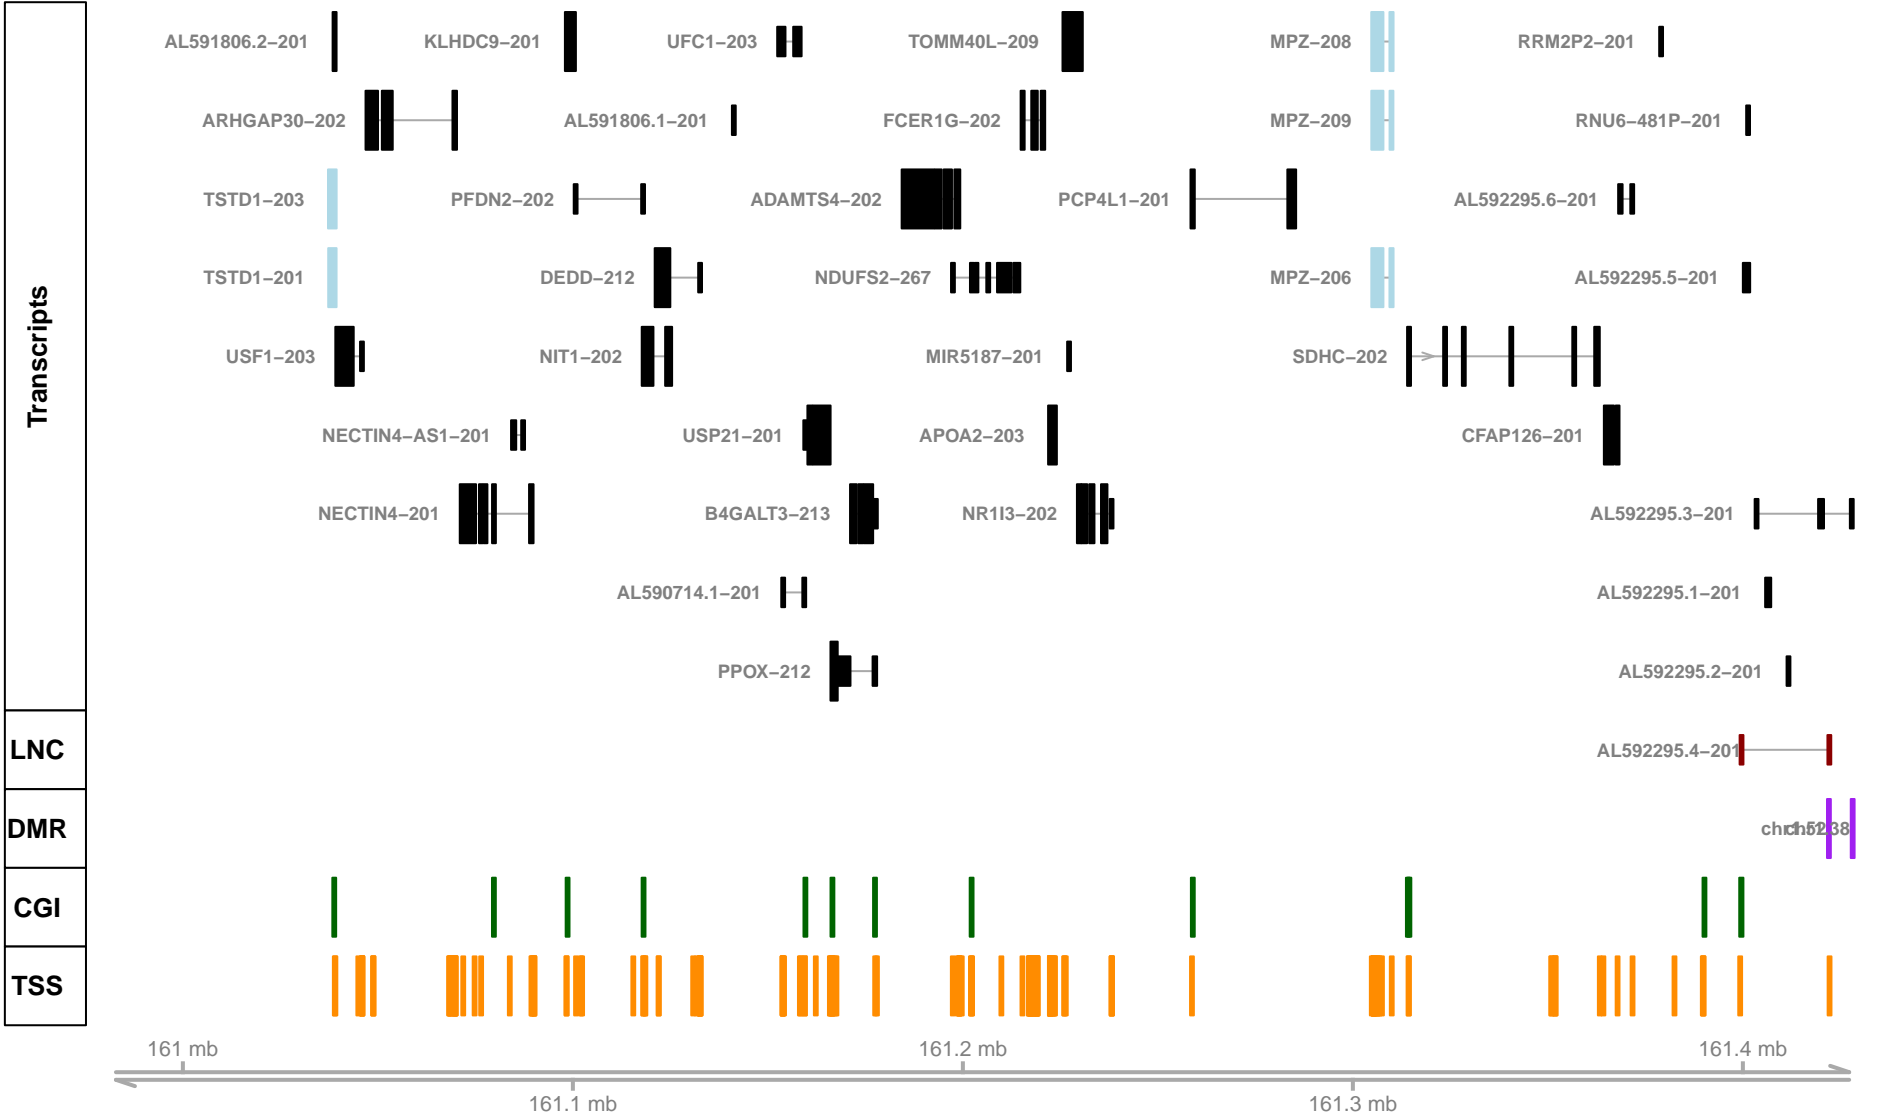

chr1.52

chr1.38

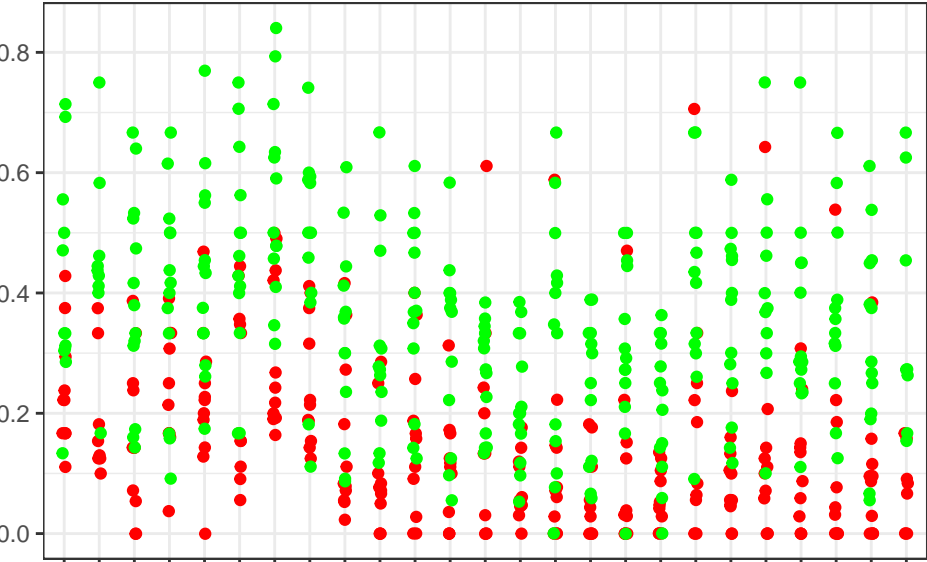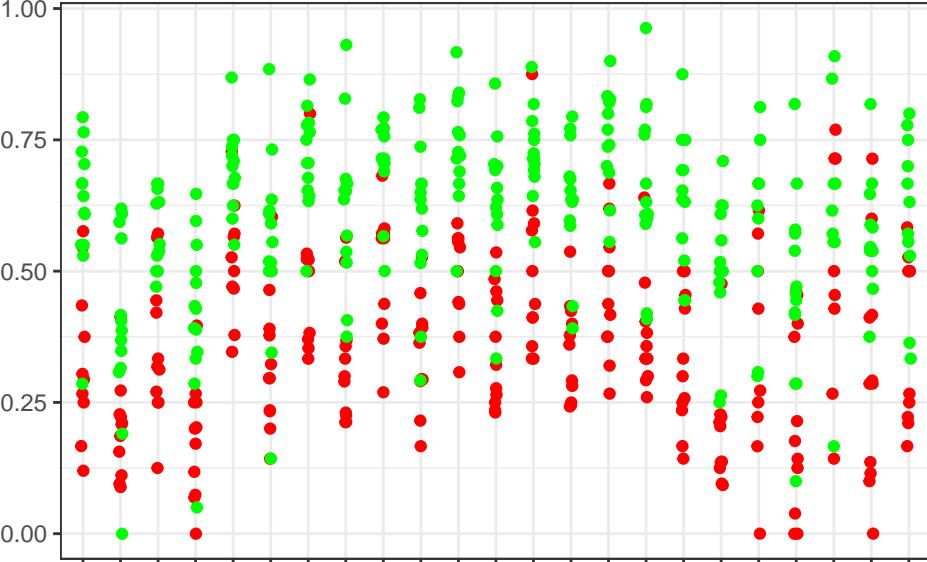

AL596188.1

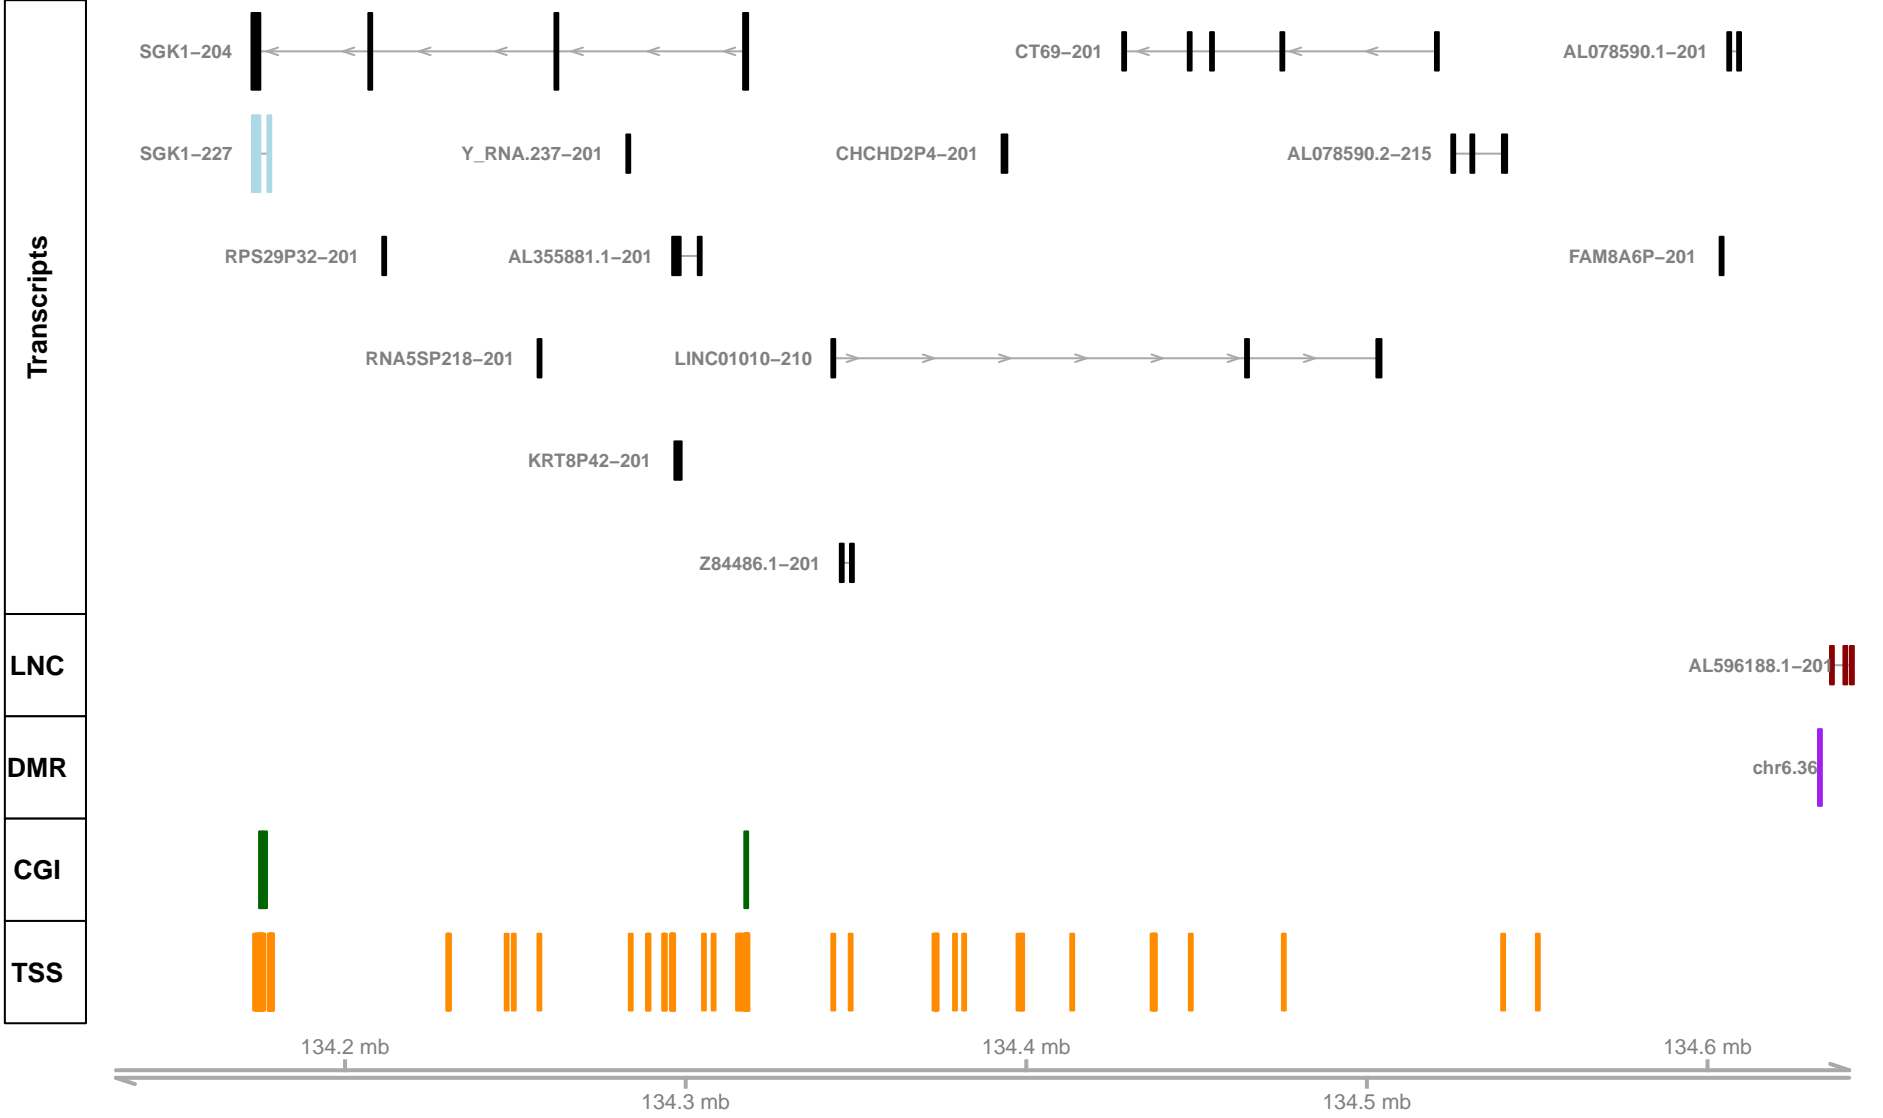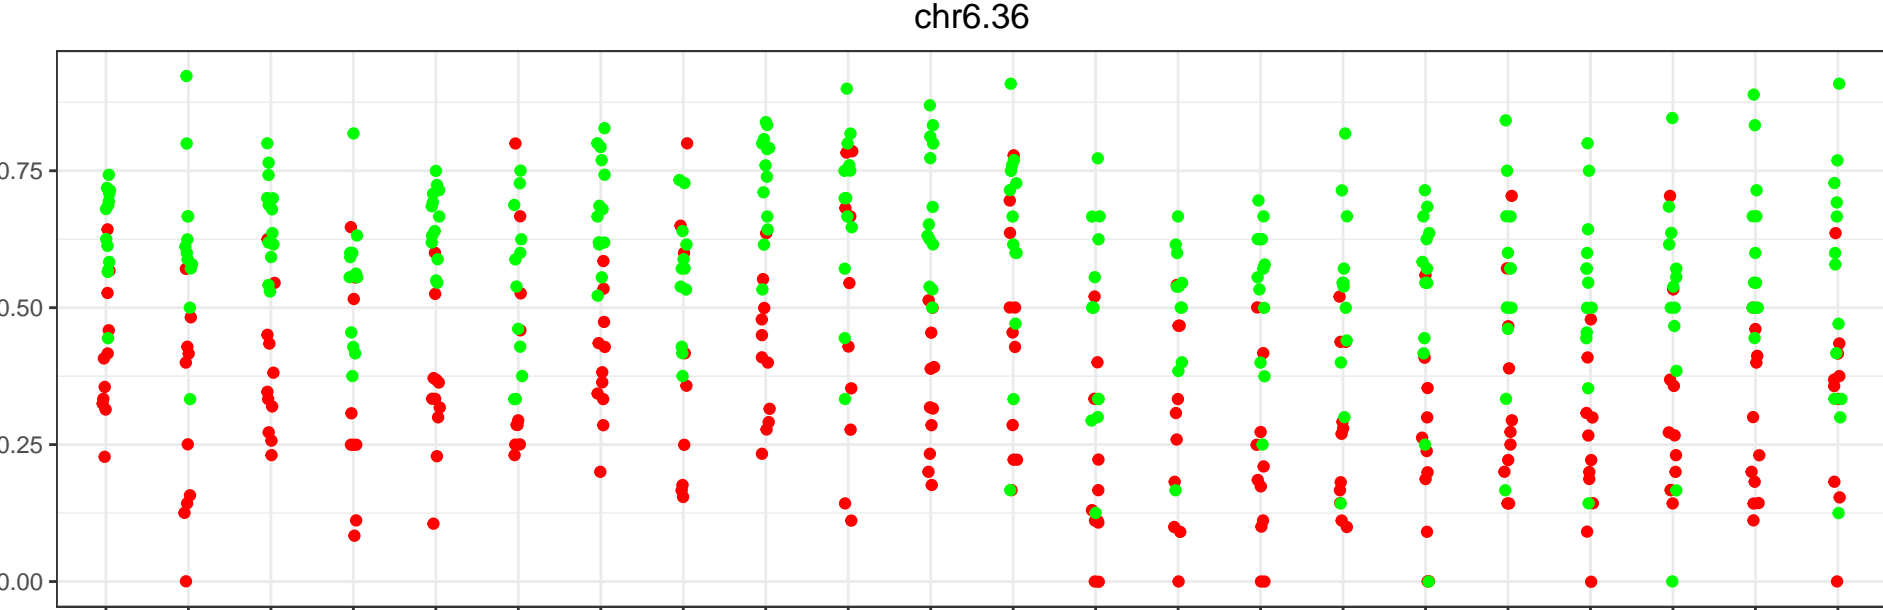

# AL603783.1

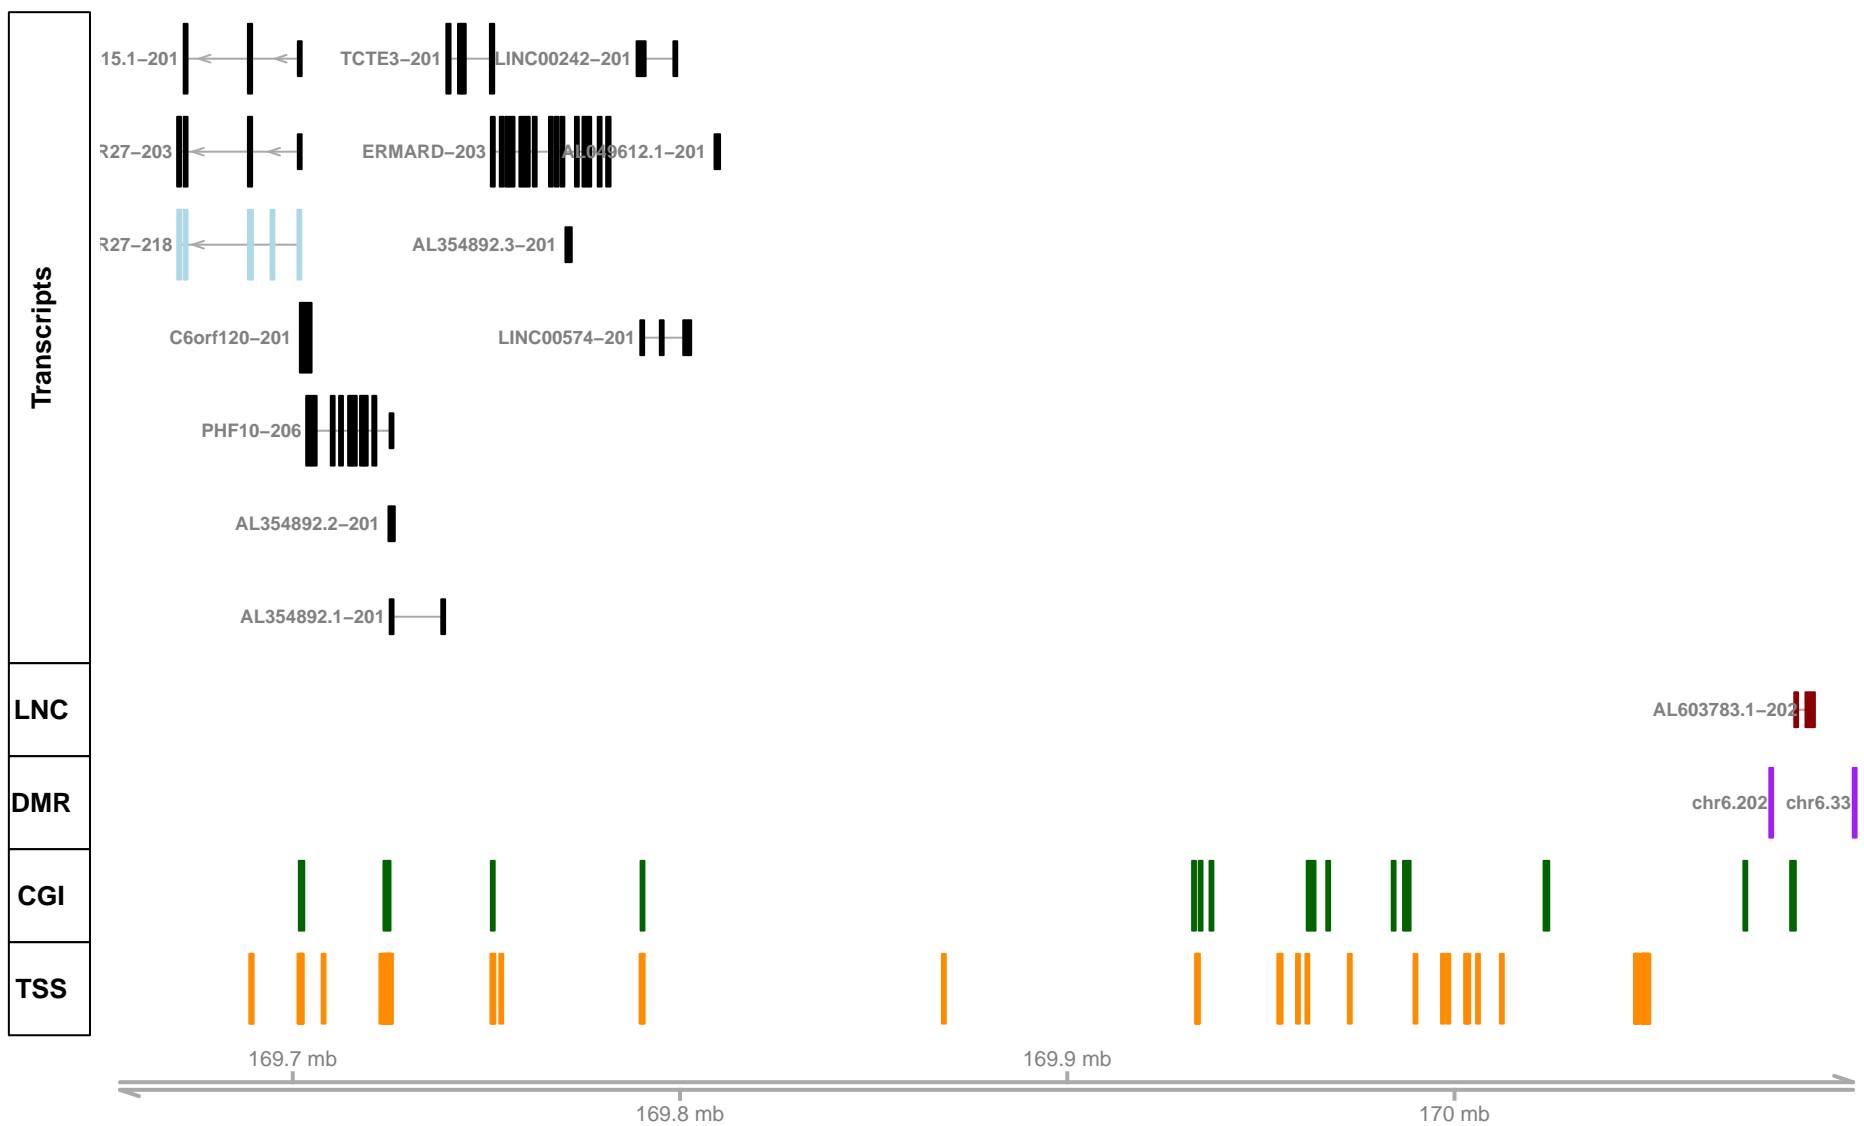

chr6.33

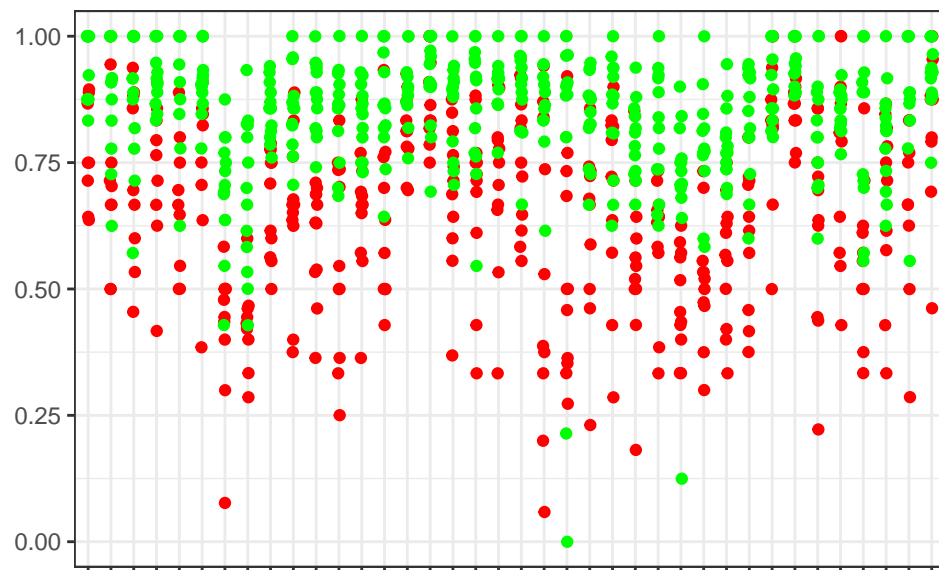

chr6.202

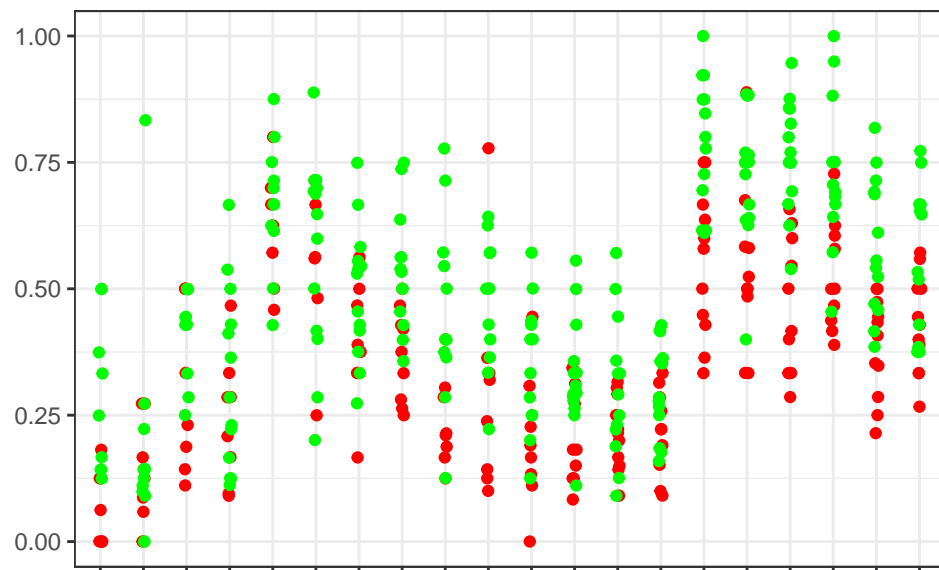

# AL662797.1

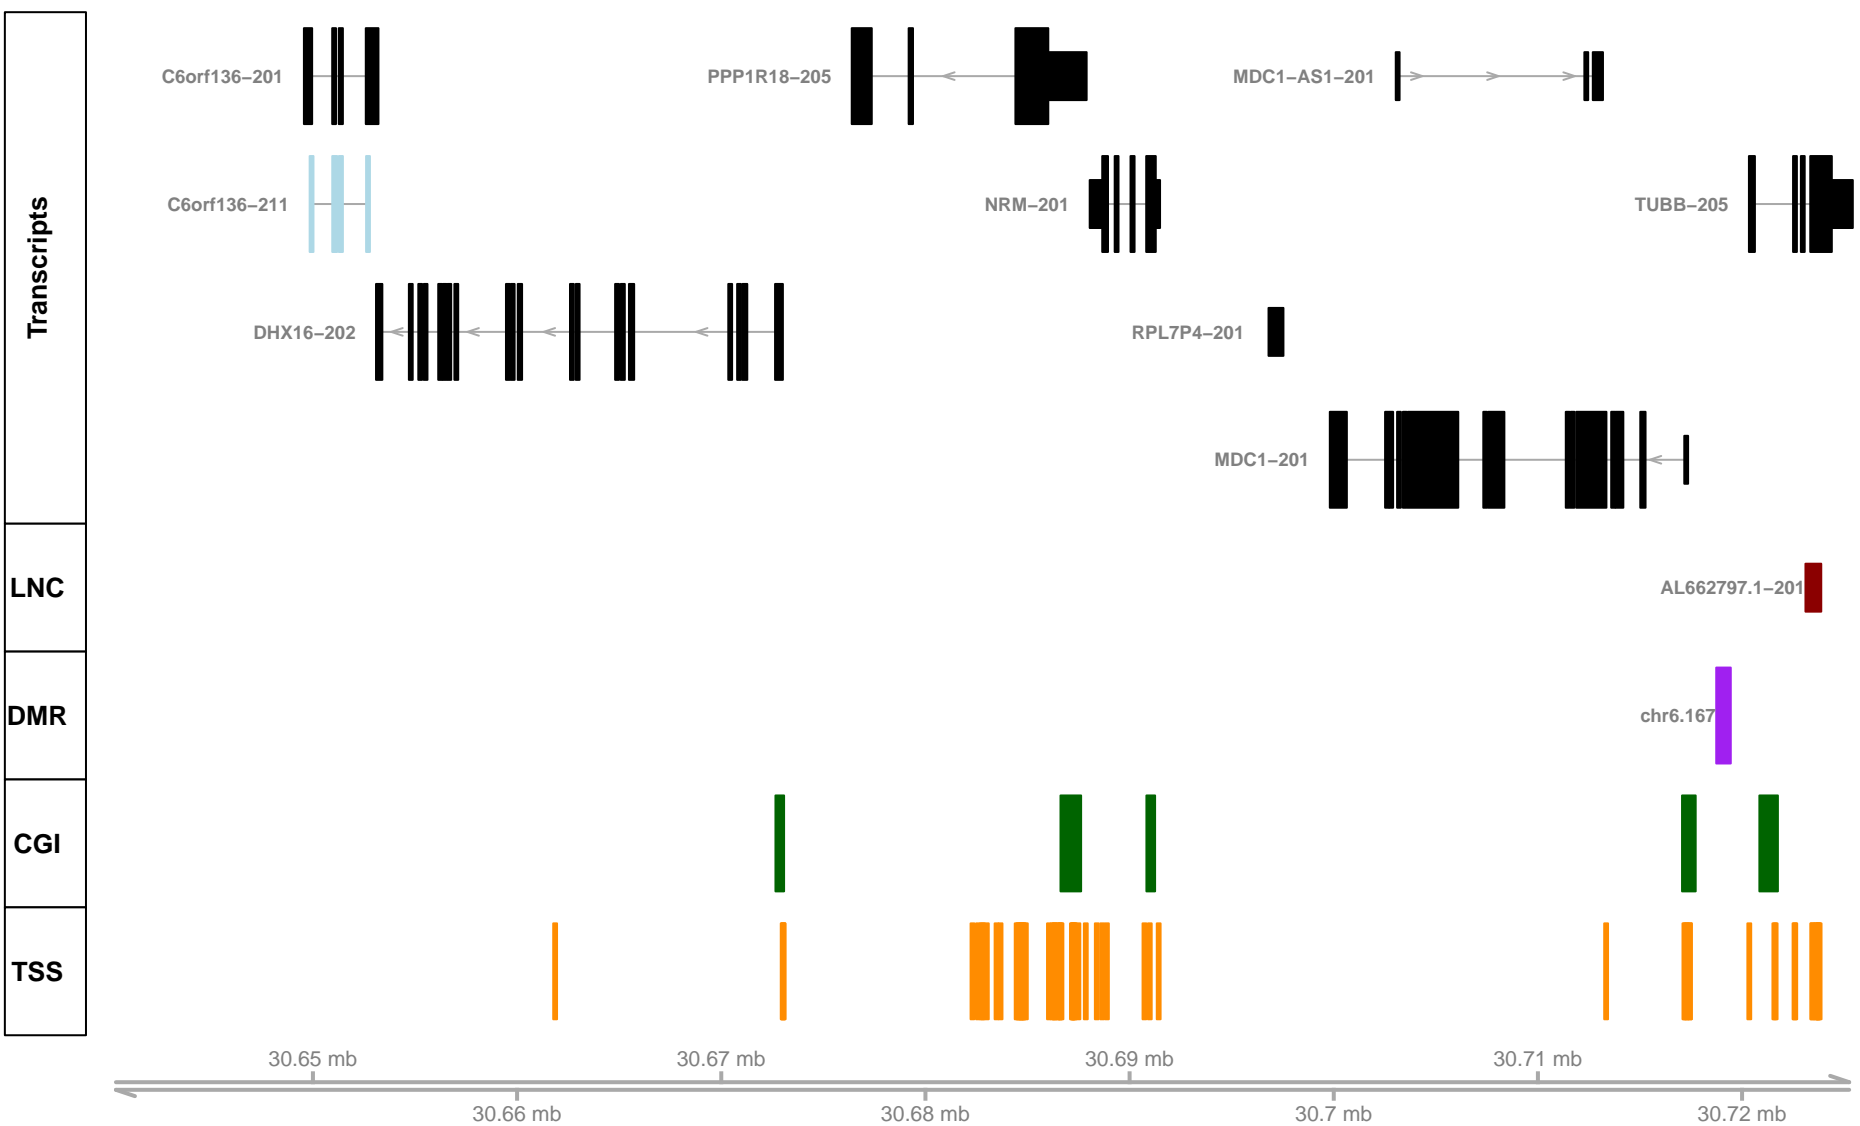

## chr6.167

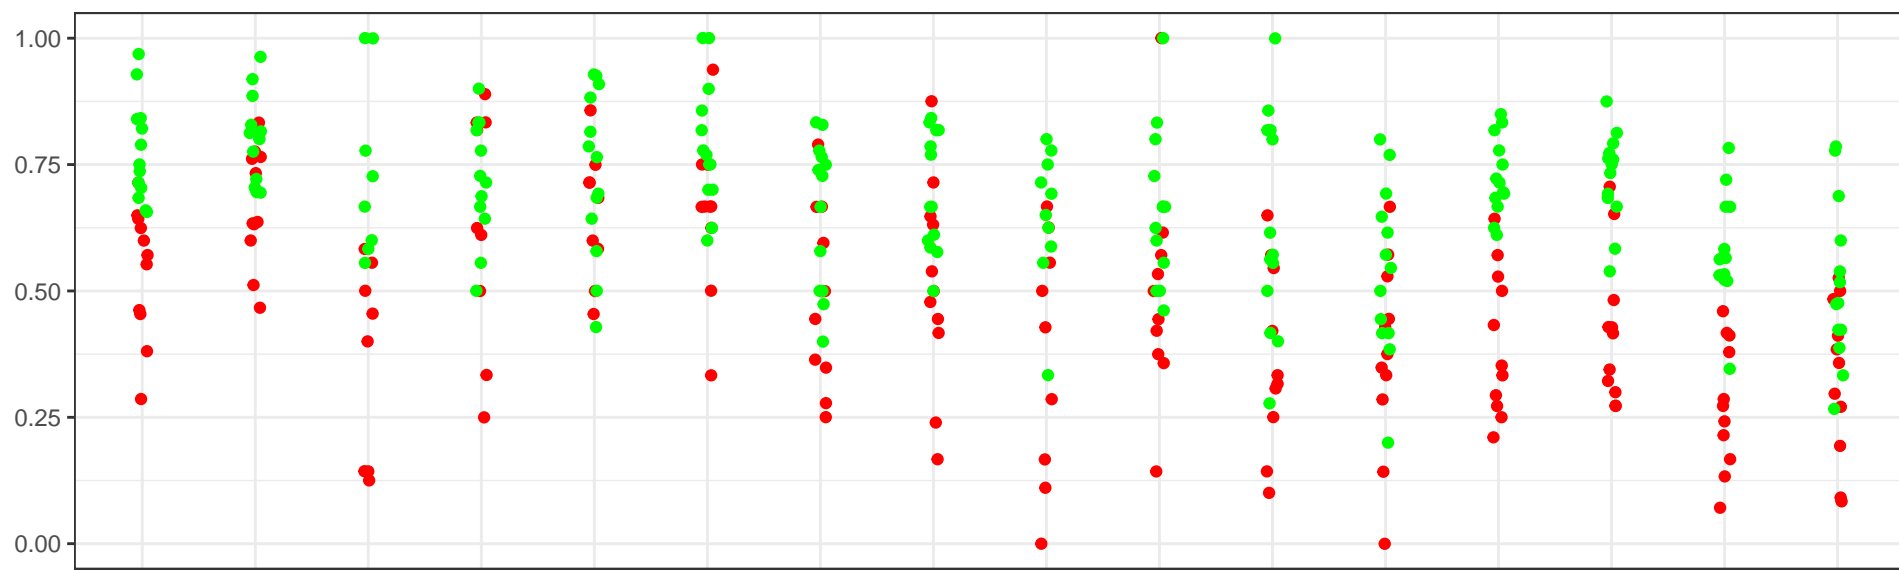

# ANKRD44-AS1

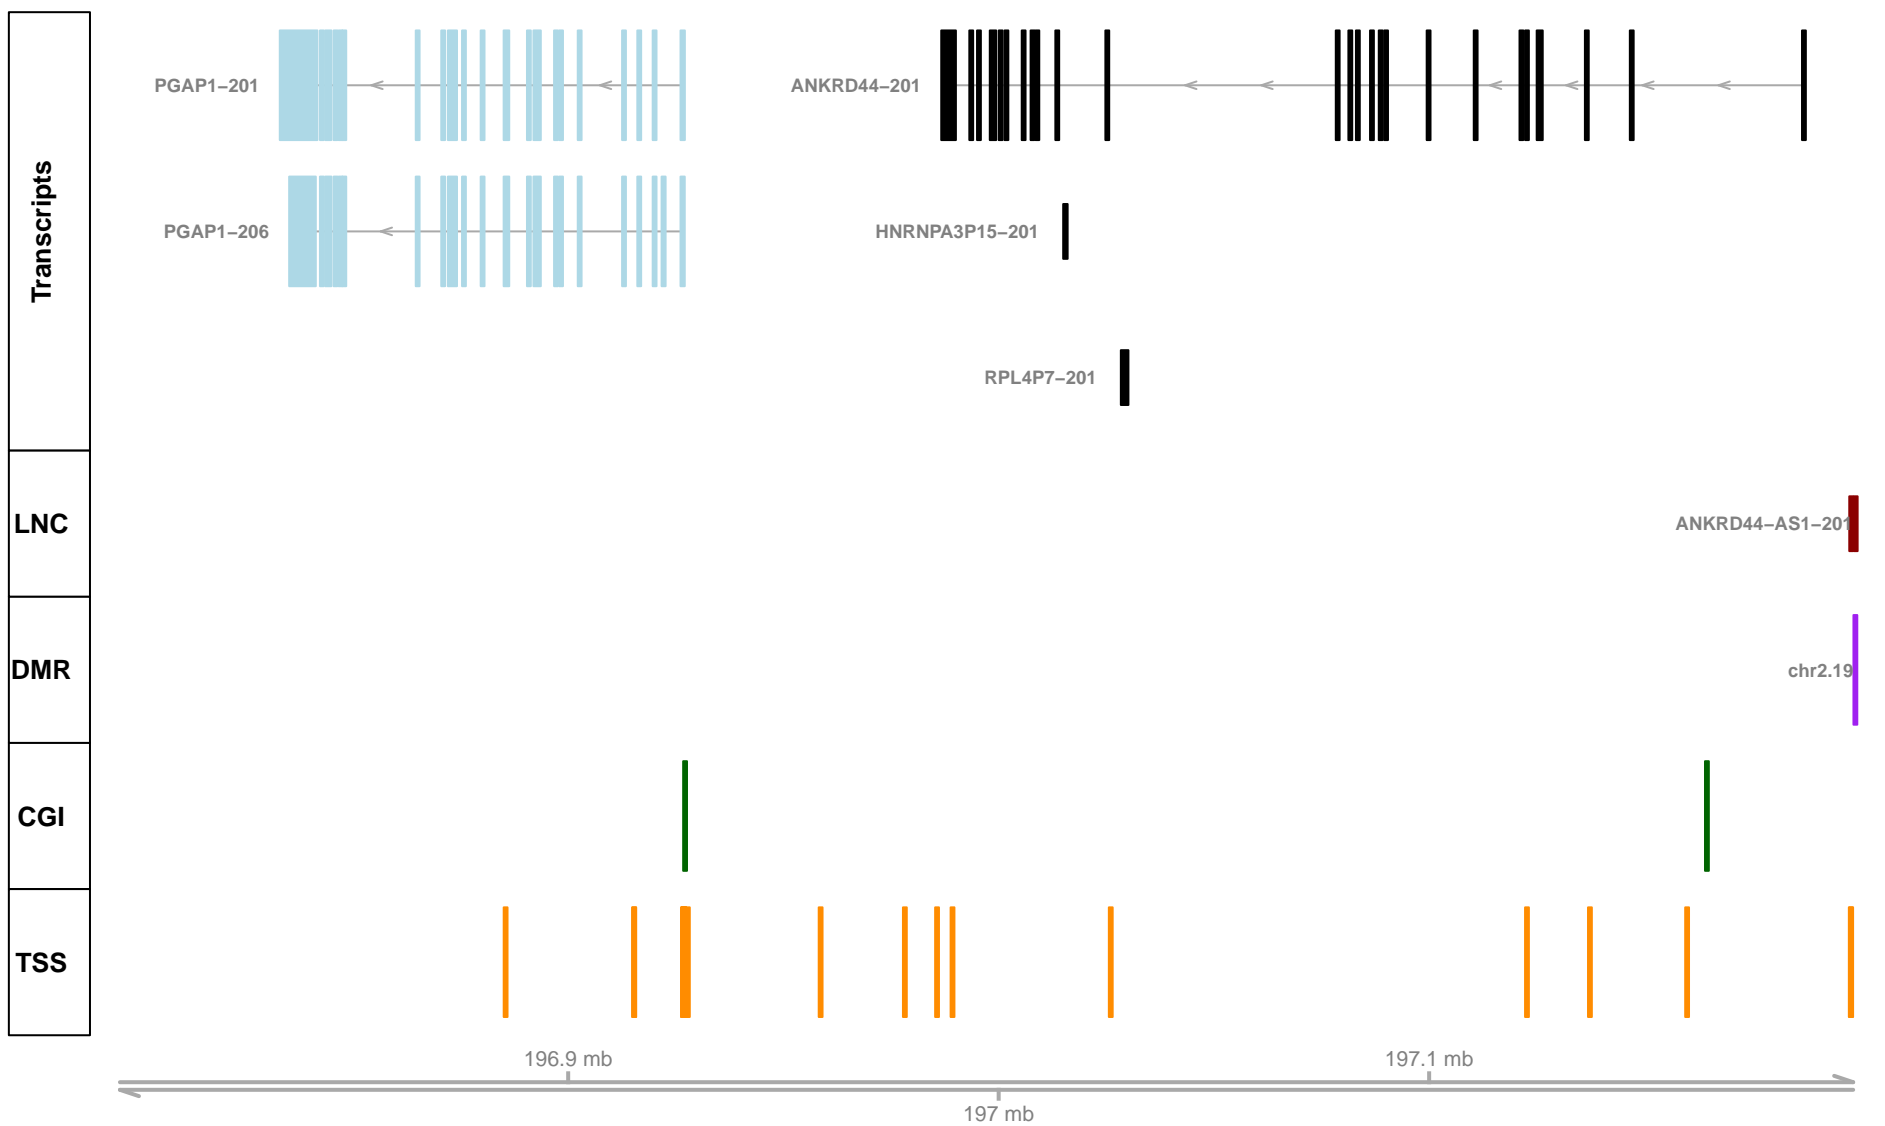

## chr2.19

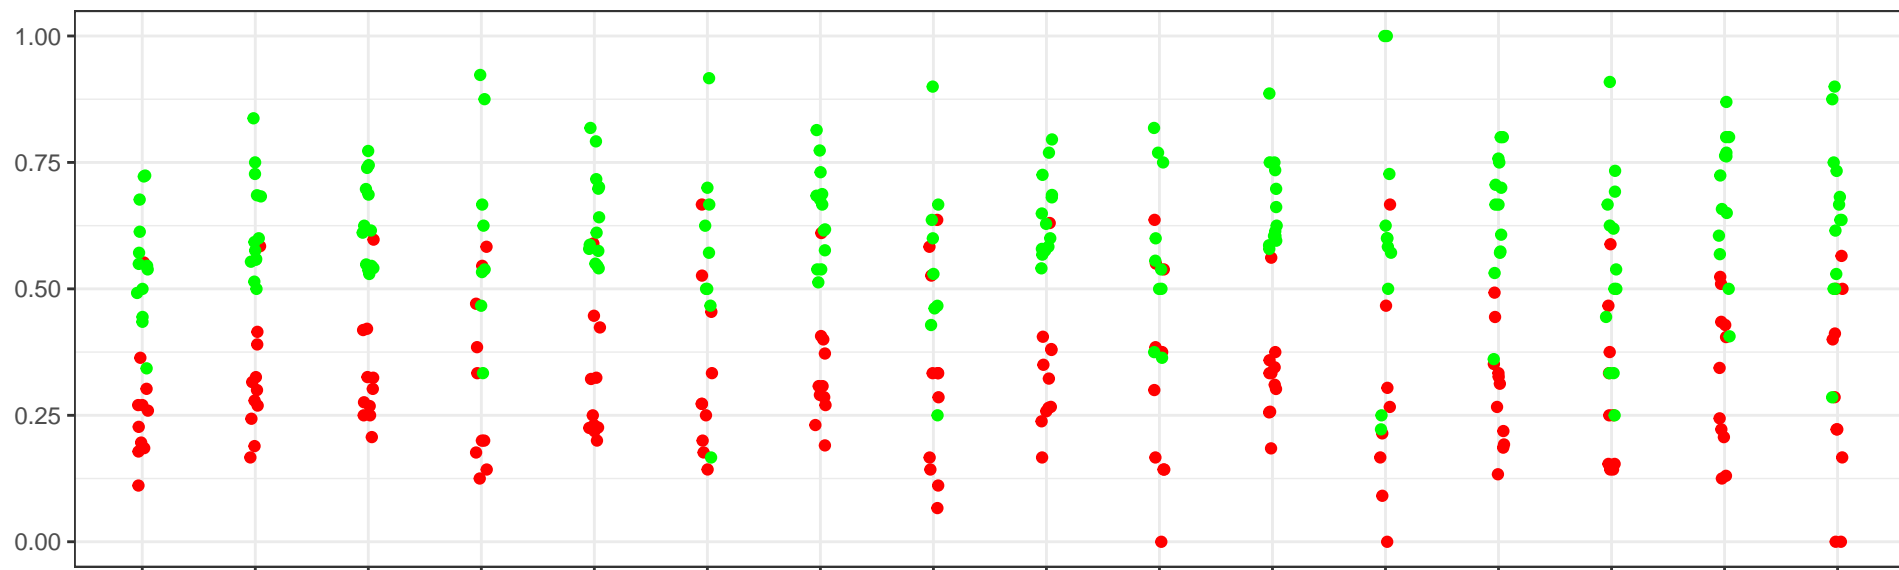

# ANKRD44-IT1

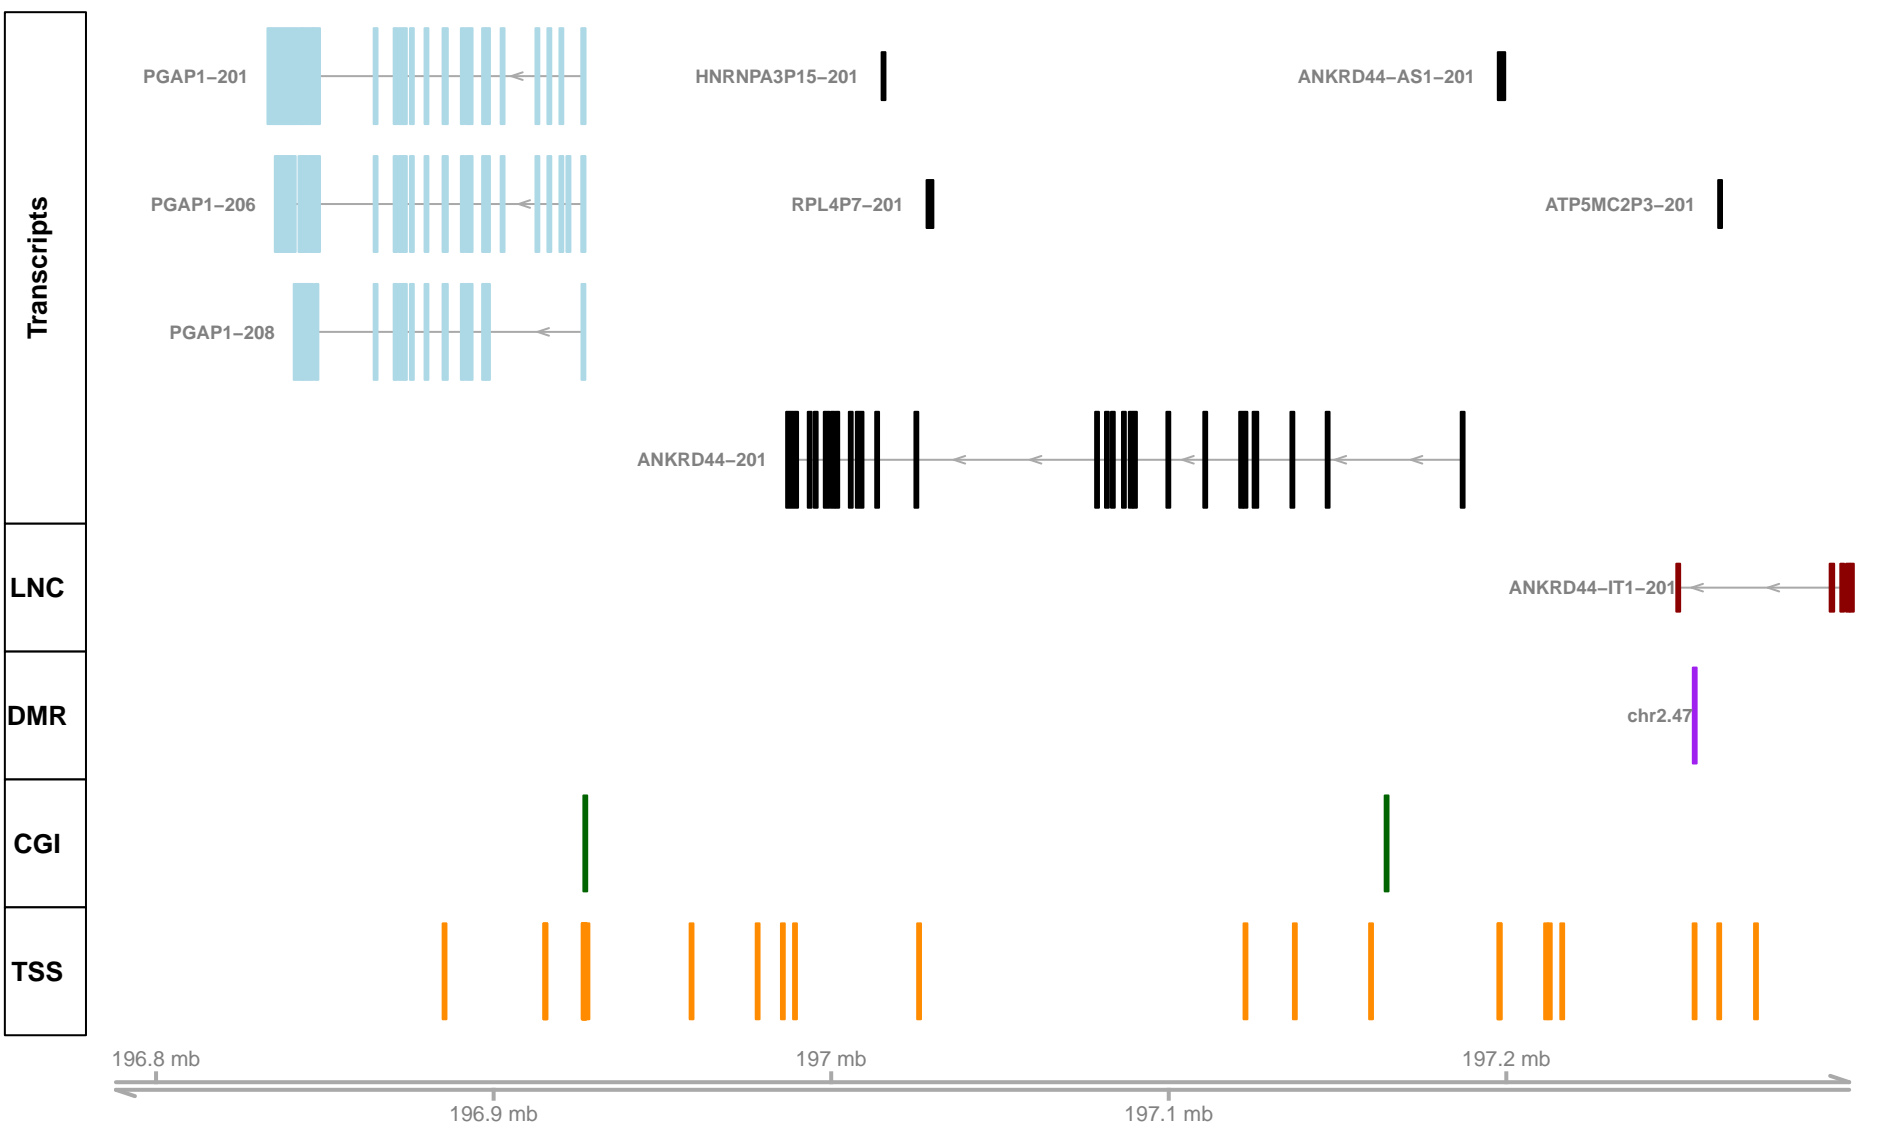

## chr2.47

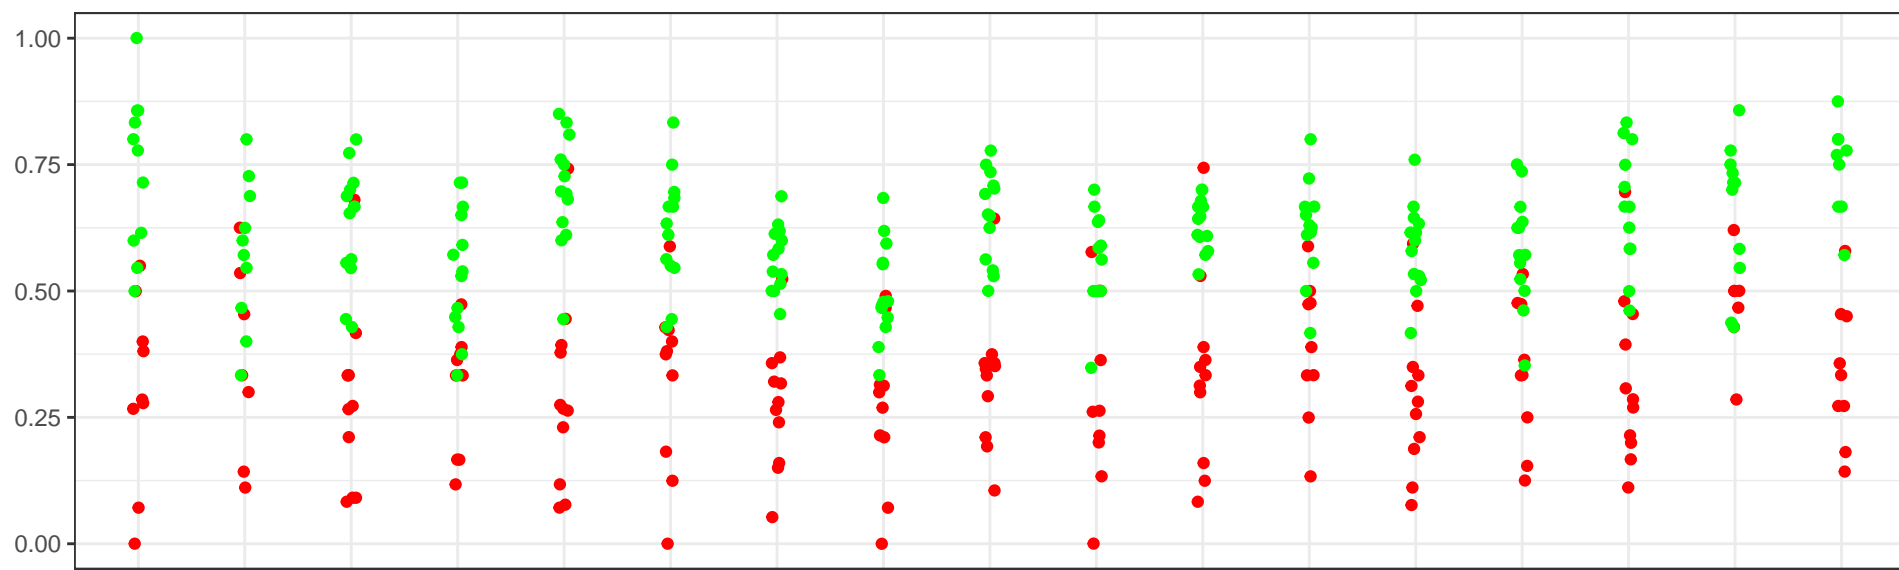

AP003721.2

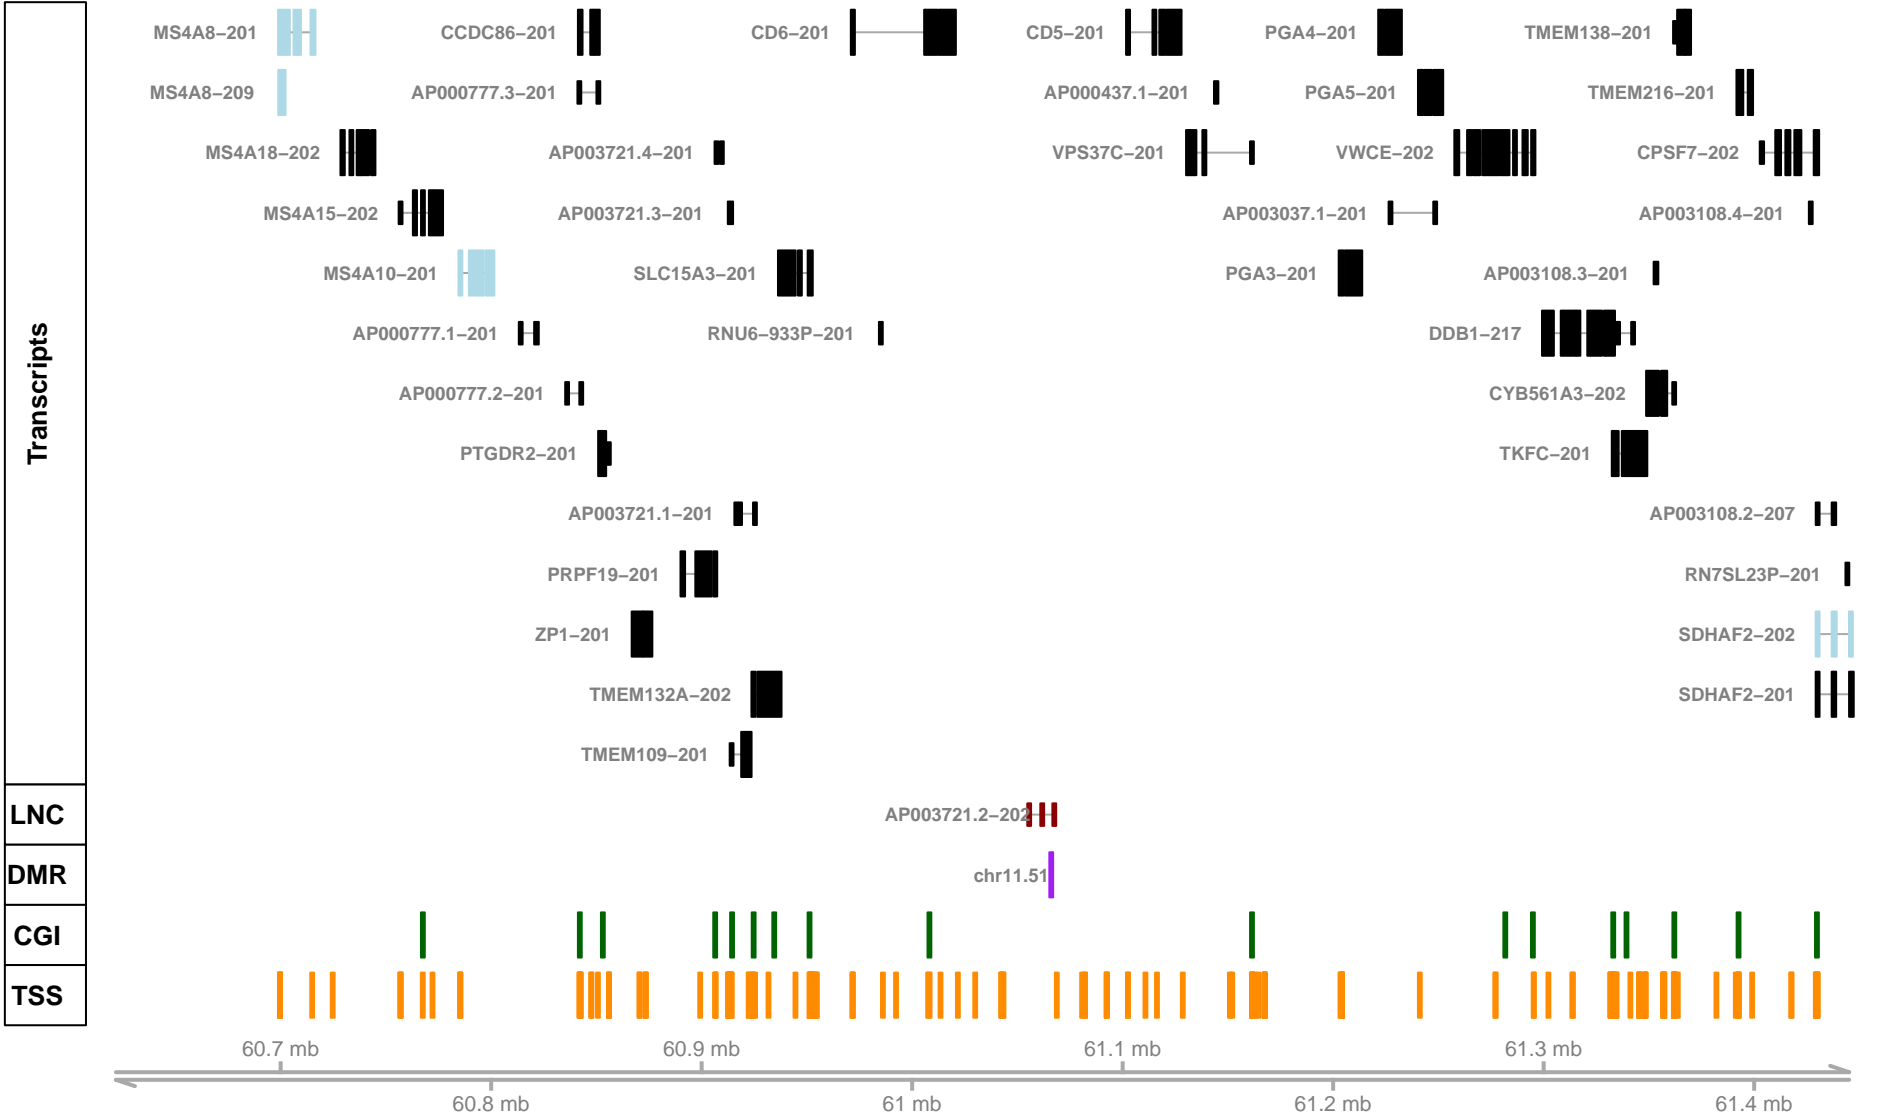

chr11.51

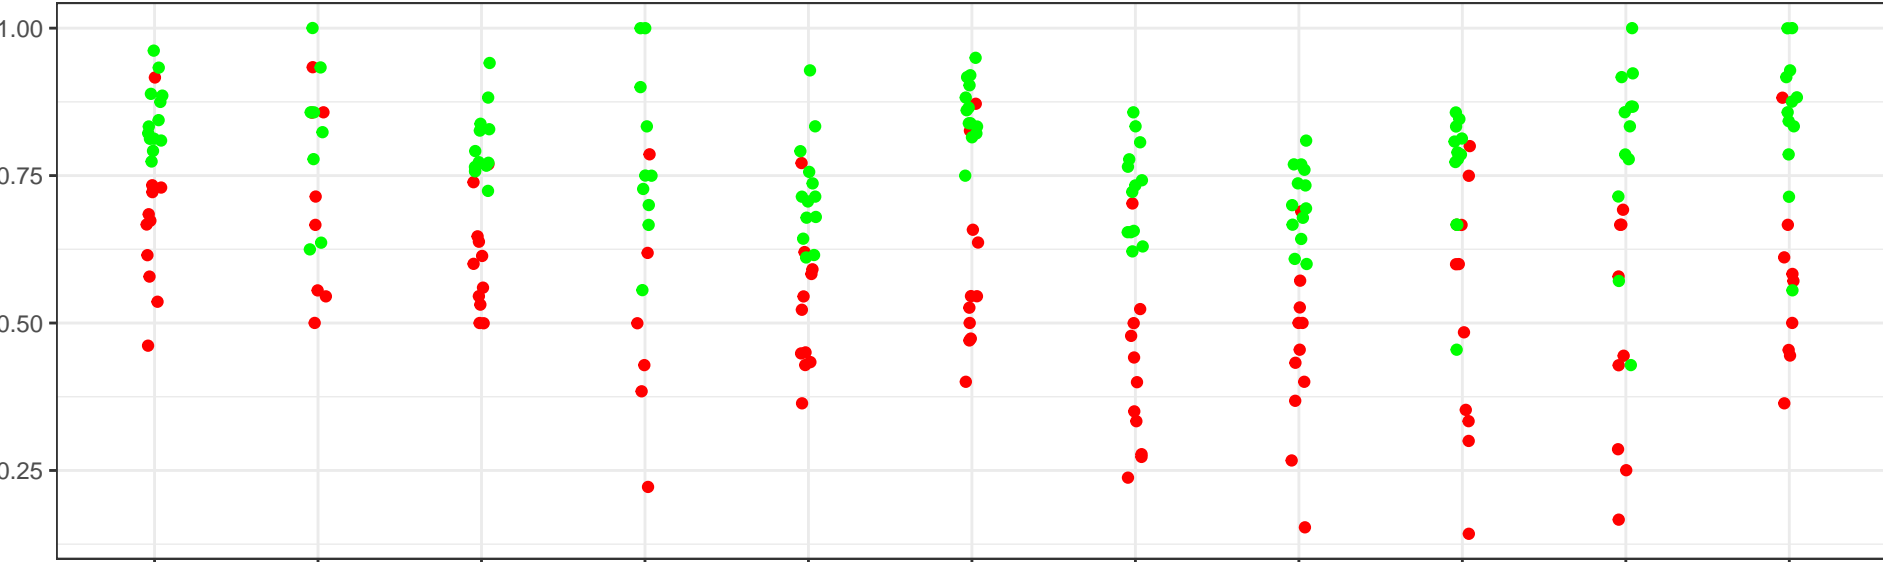

AP004609.1

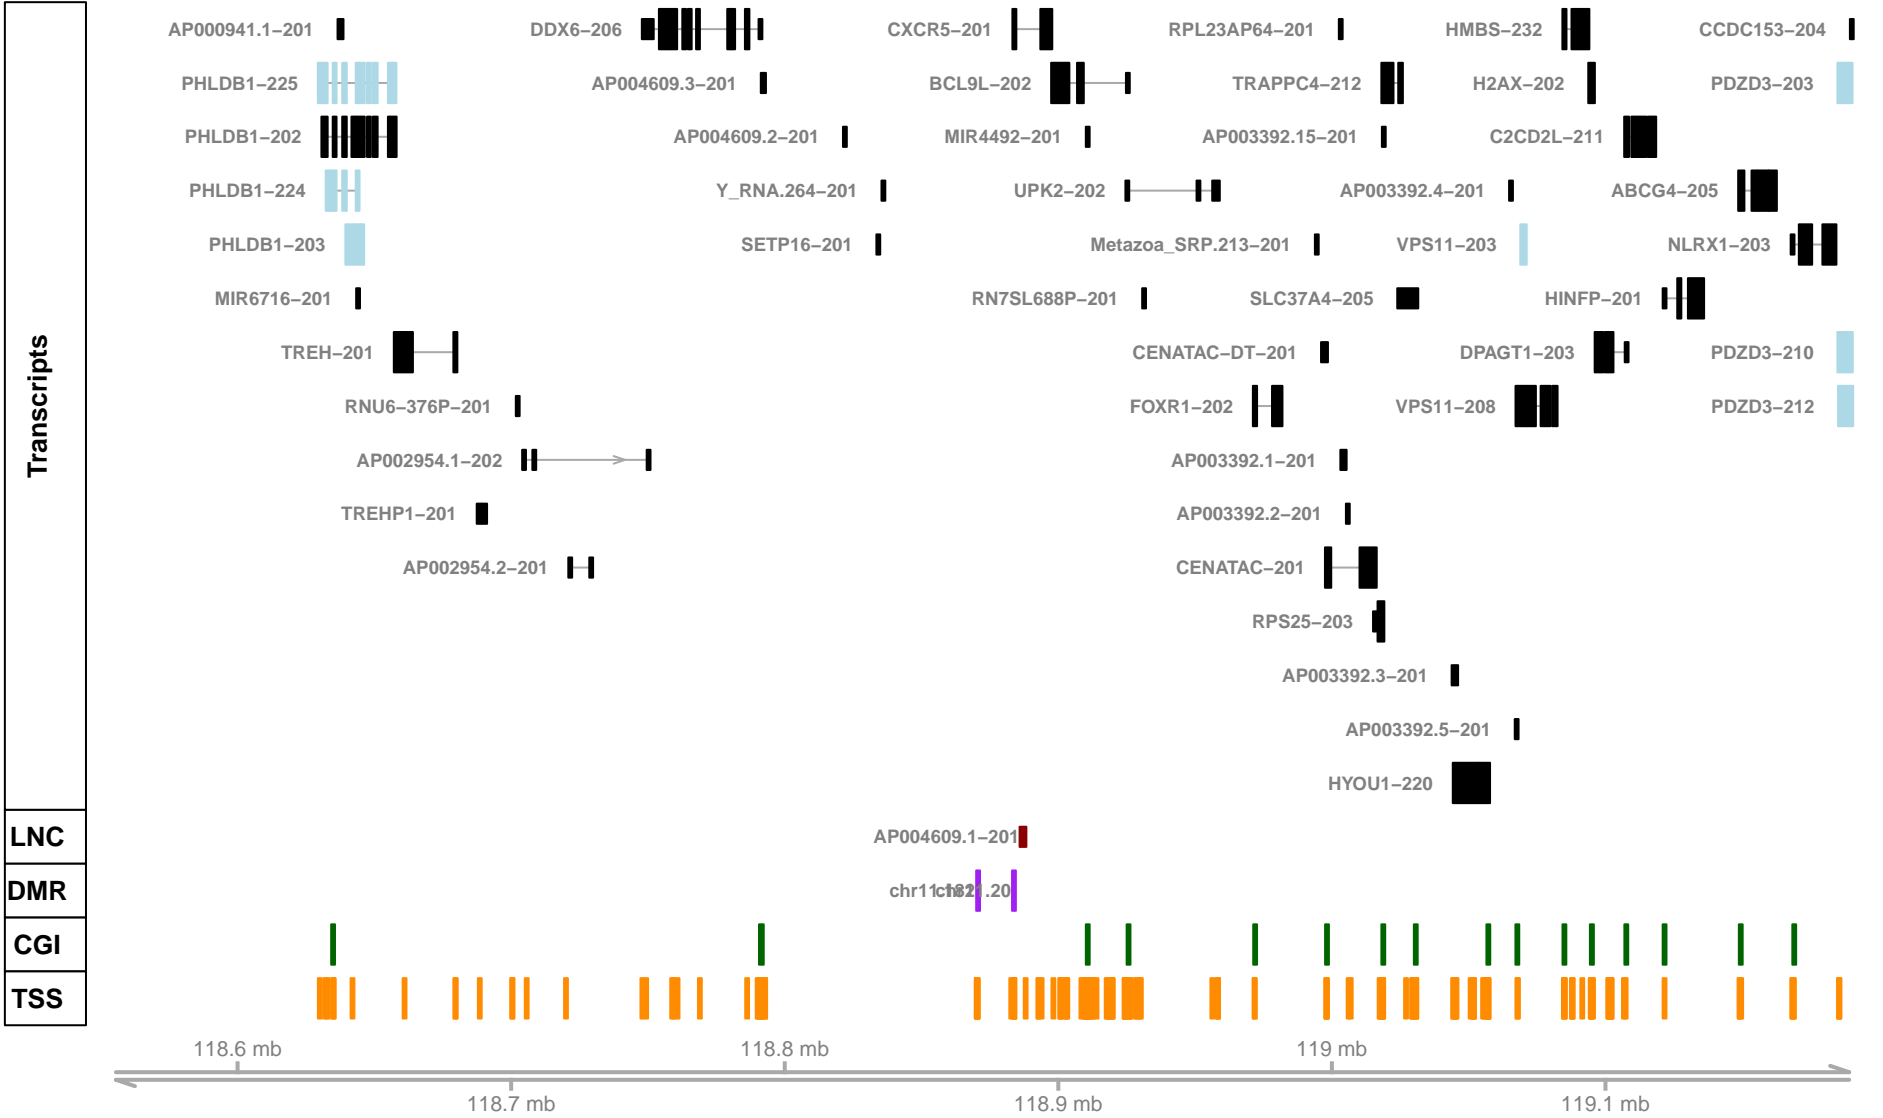

chr11.20

chr11.182

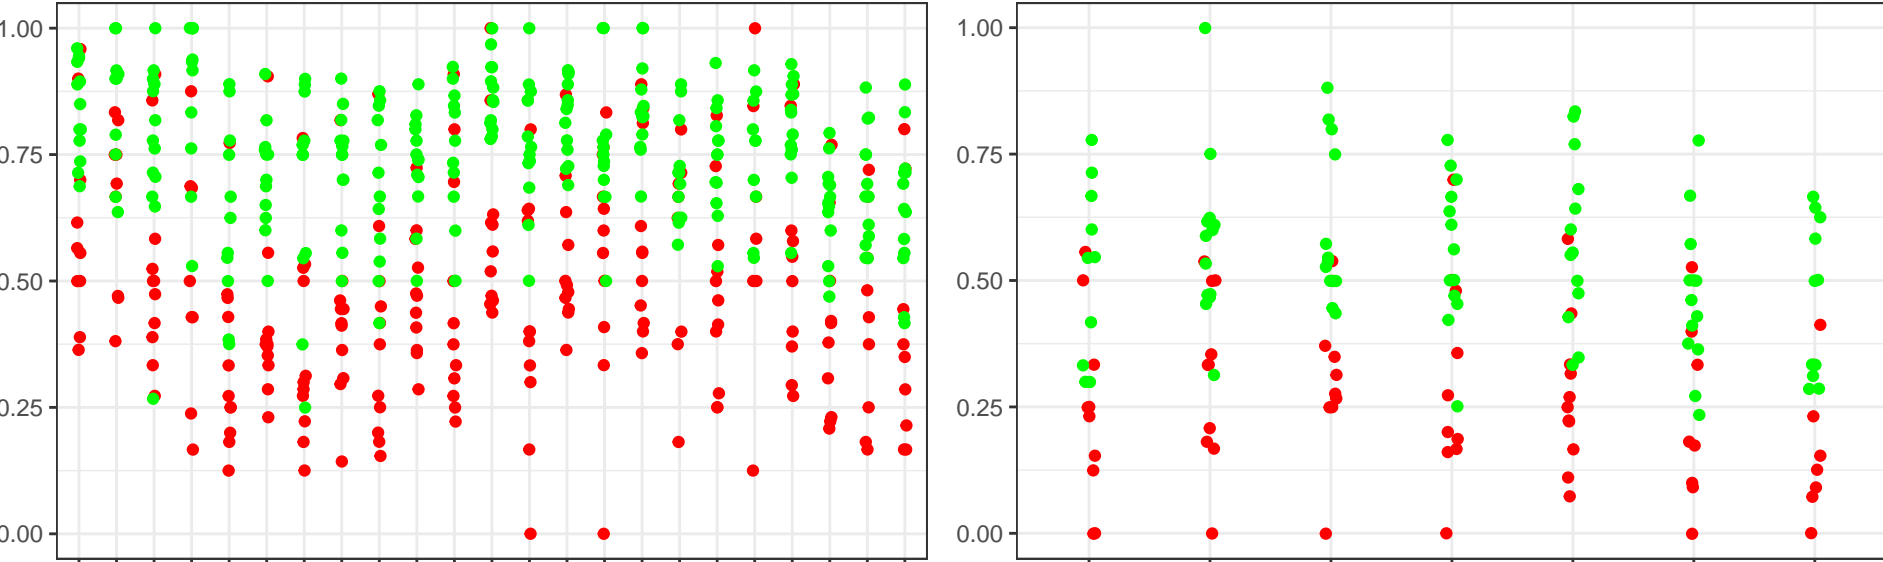

# ARHGEF2-AS1

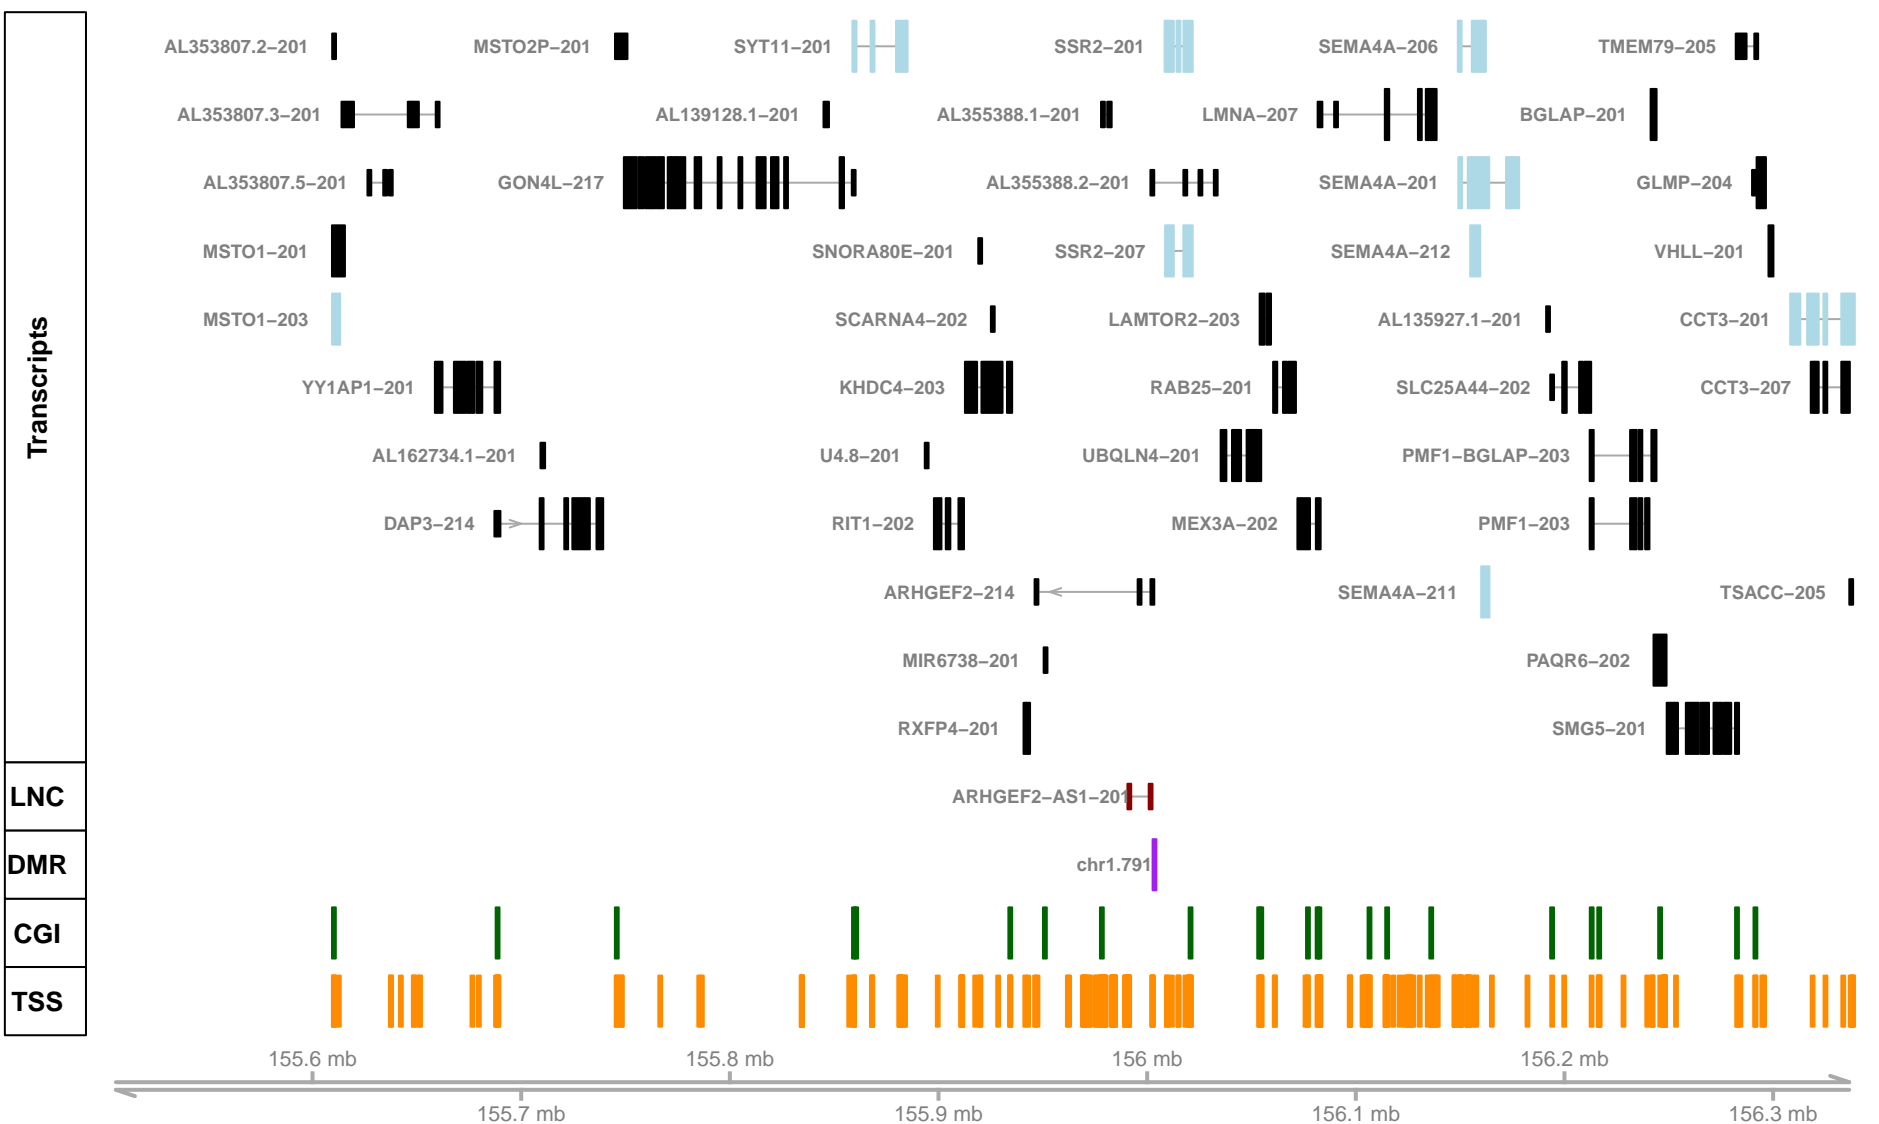

chr1.791

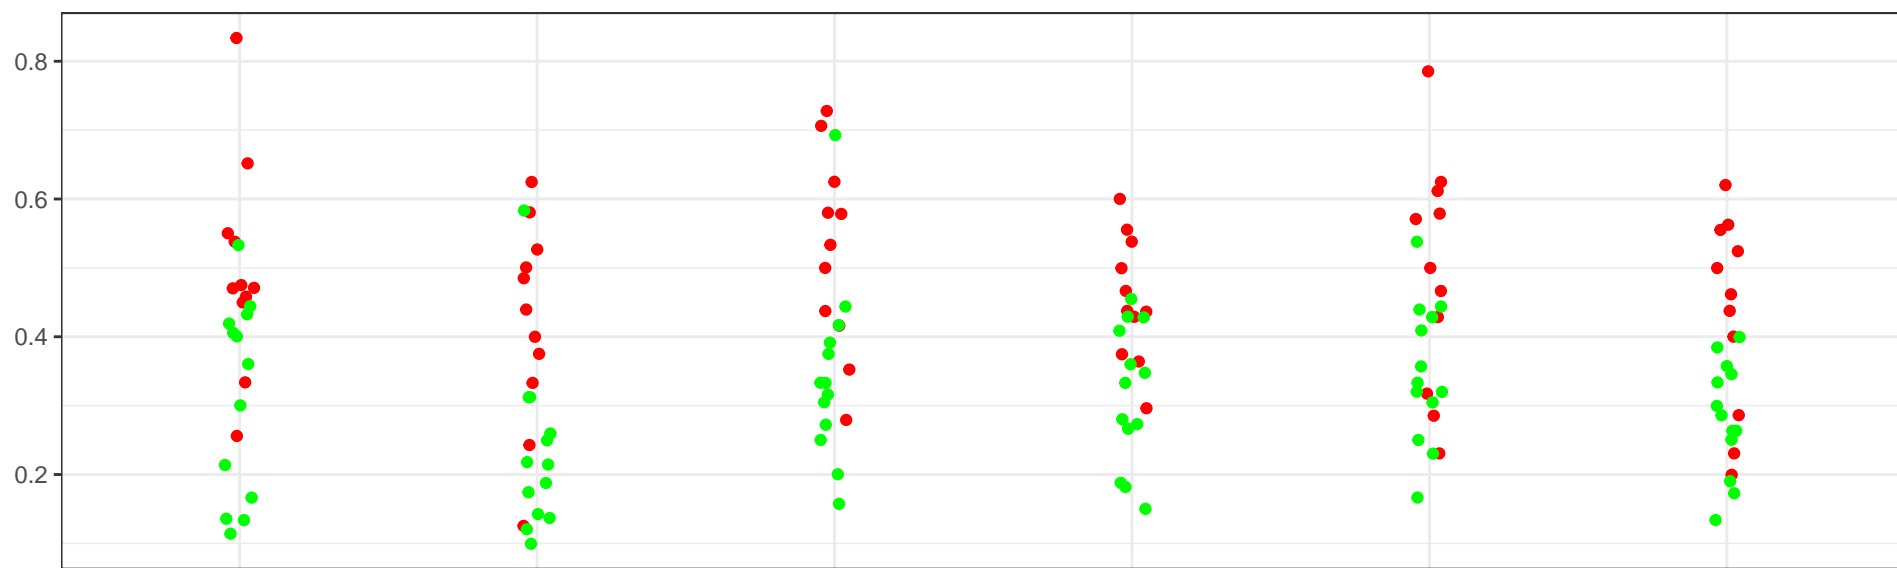

# ARNTL2-AS1

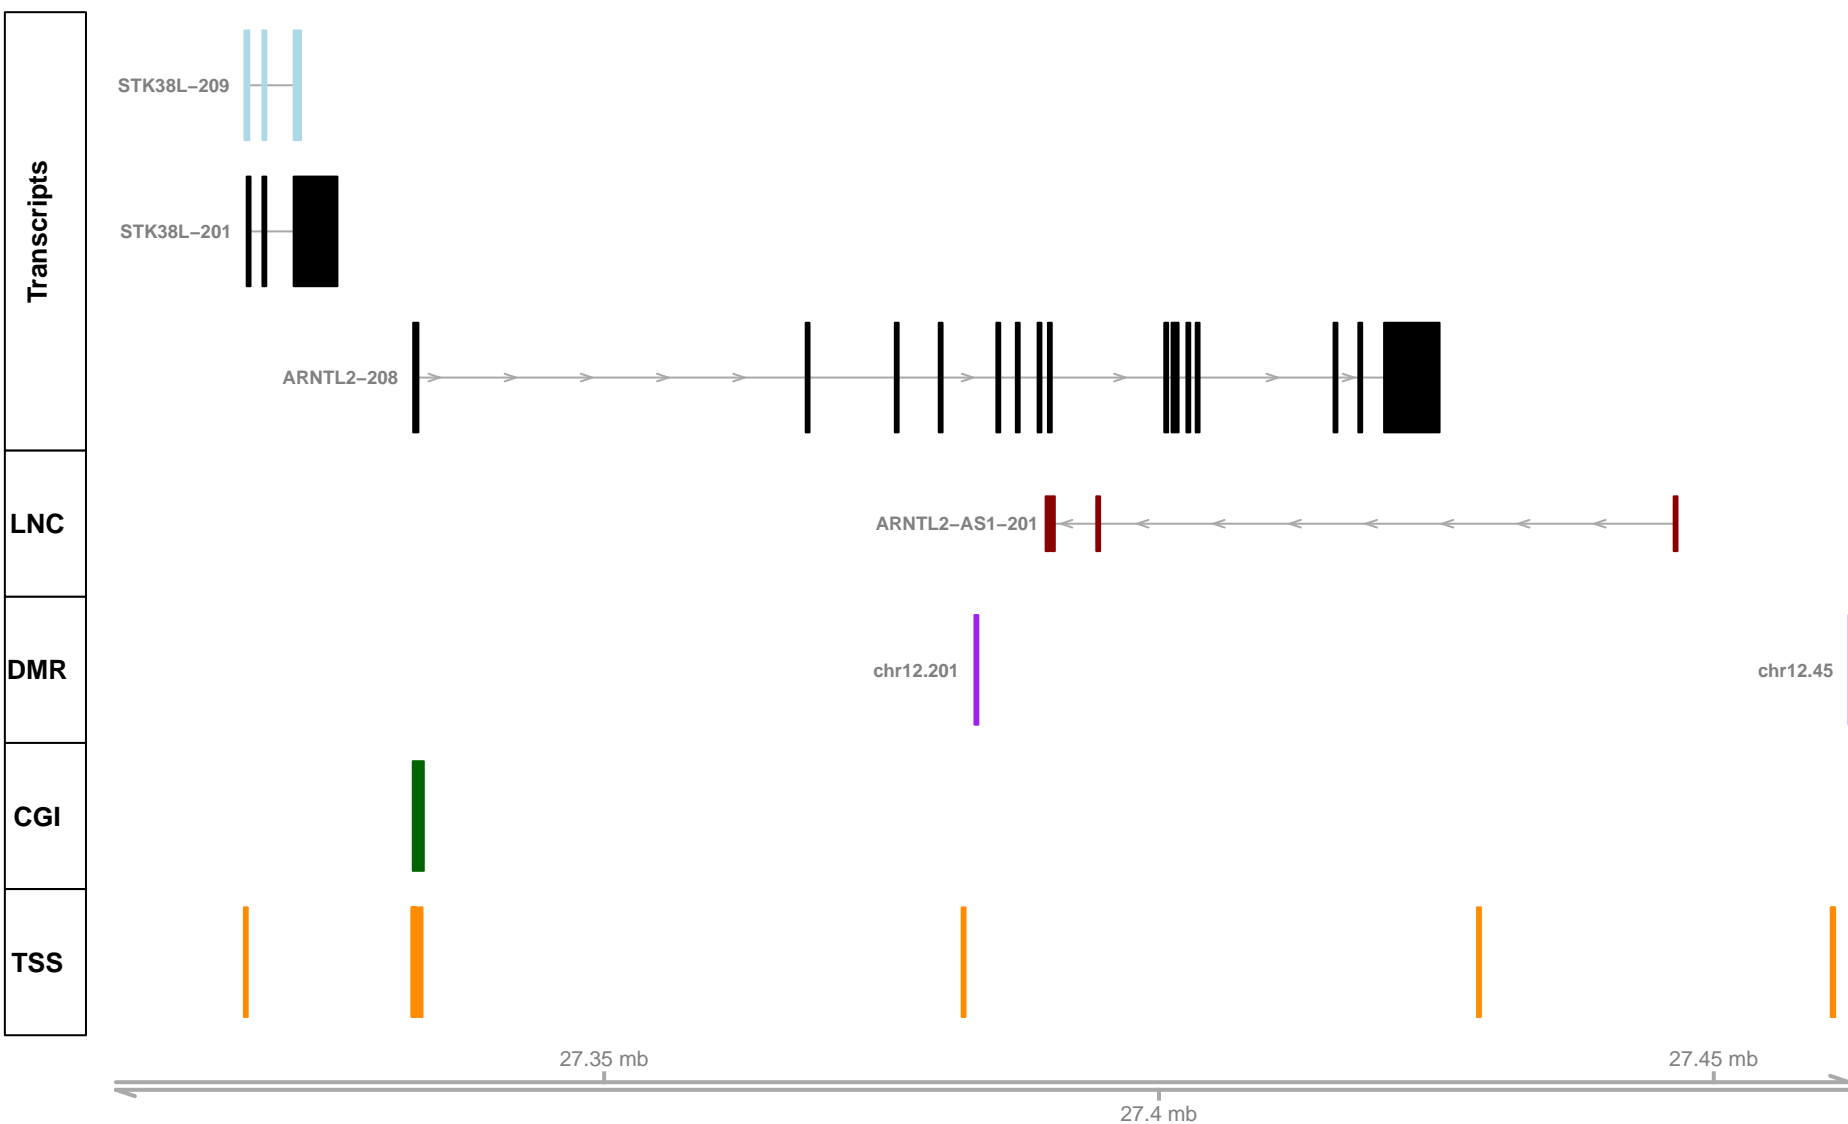

chr12.45

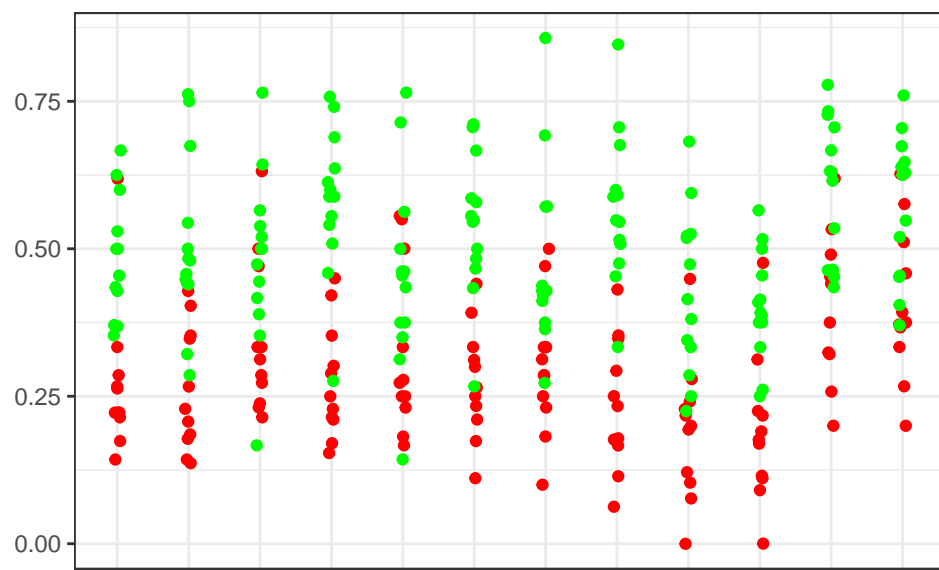

chr12.201

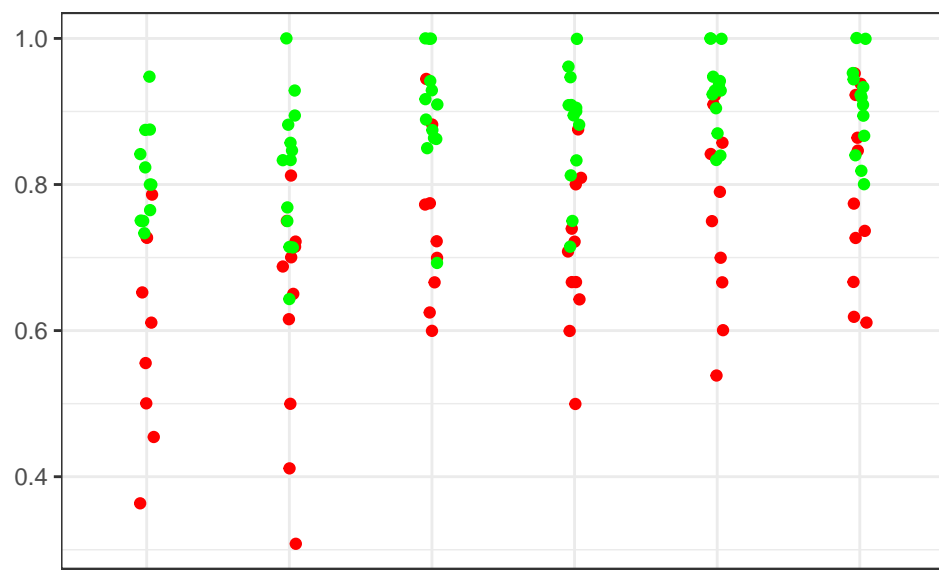

BX640514.2

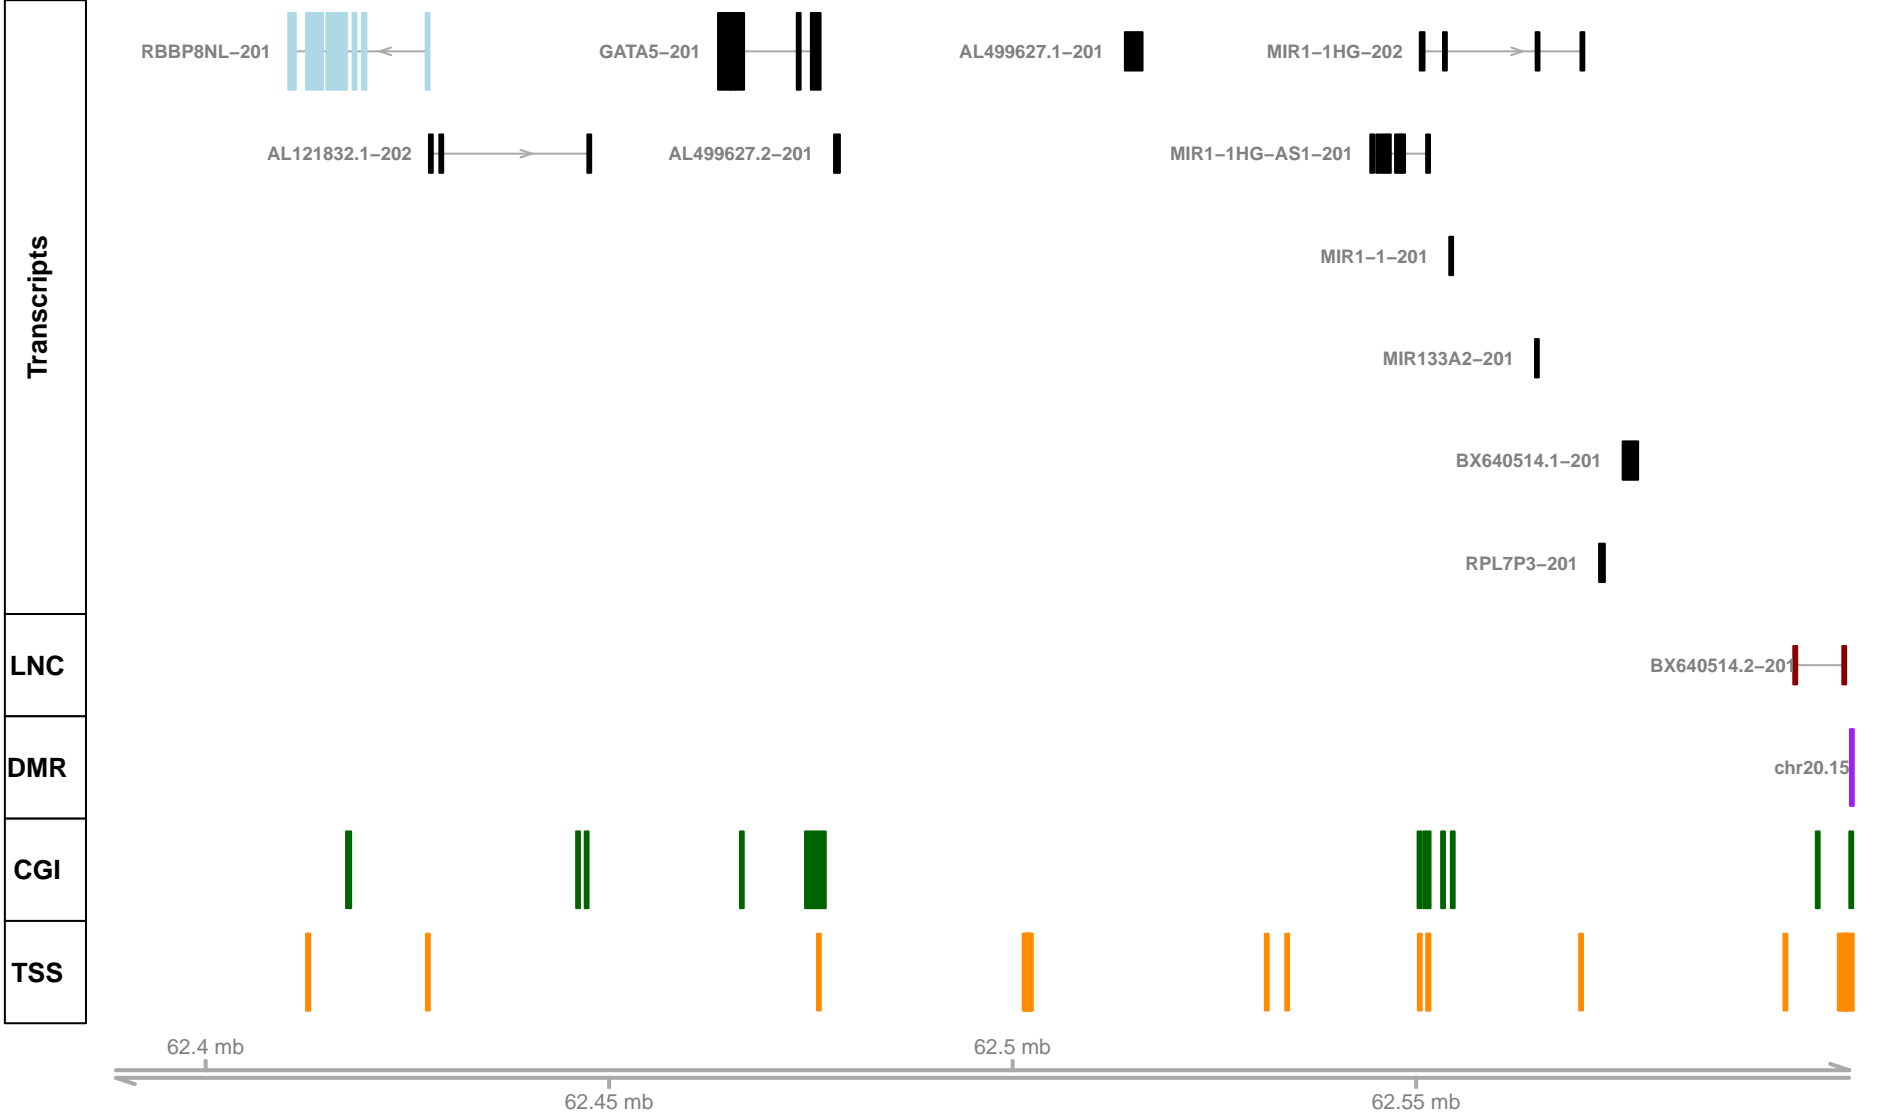

chr20.15

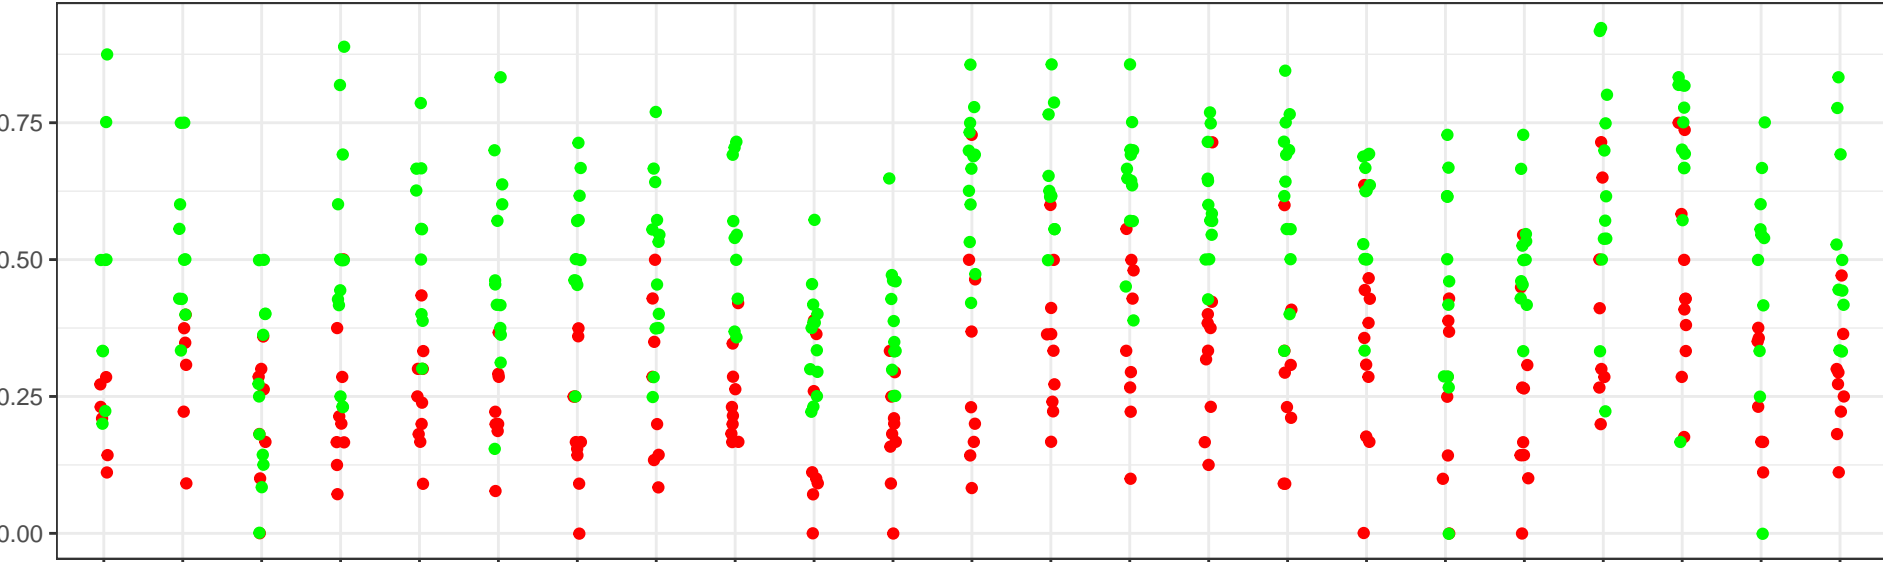

# CARD8-AS1

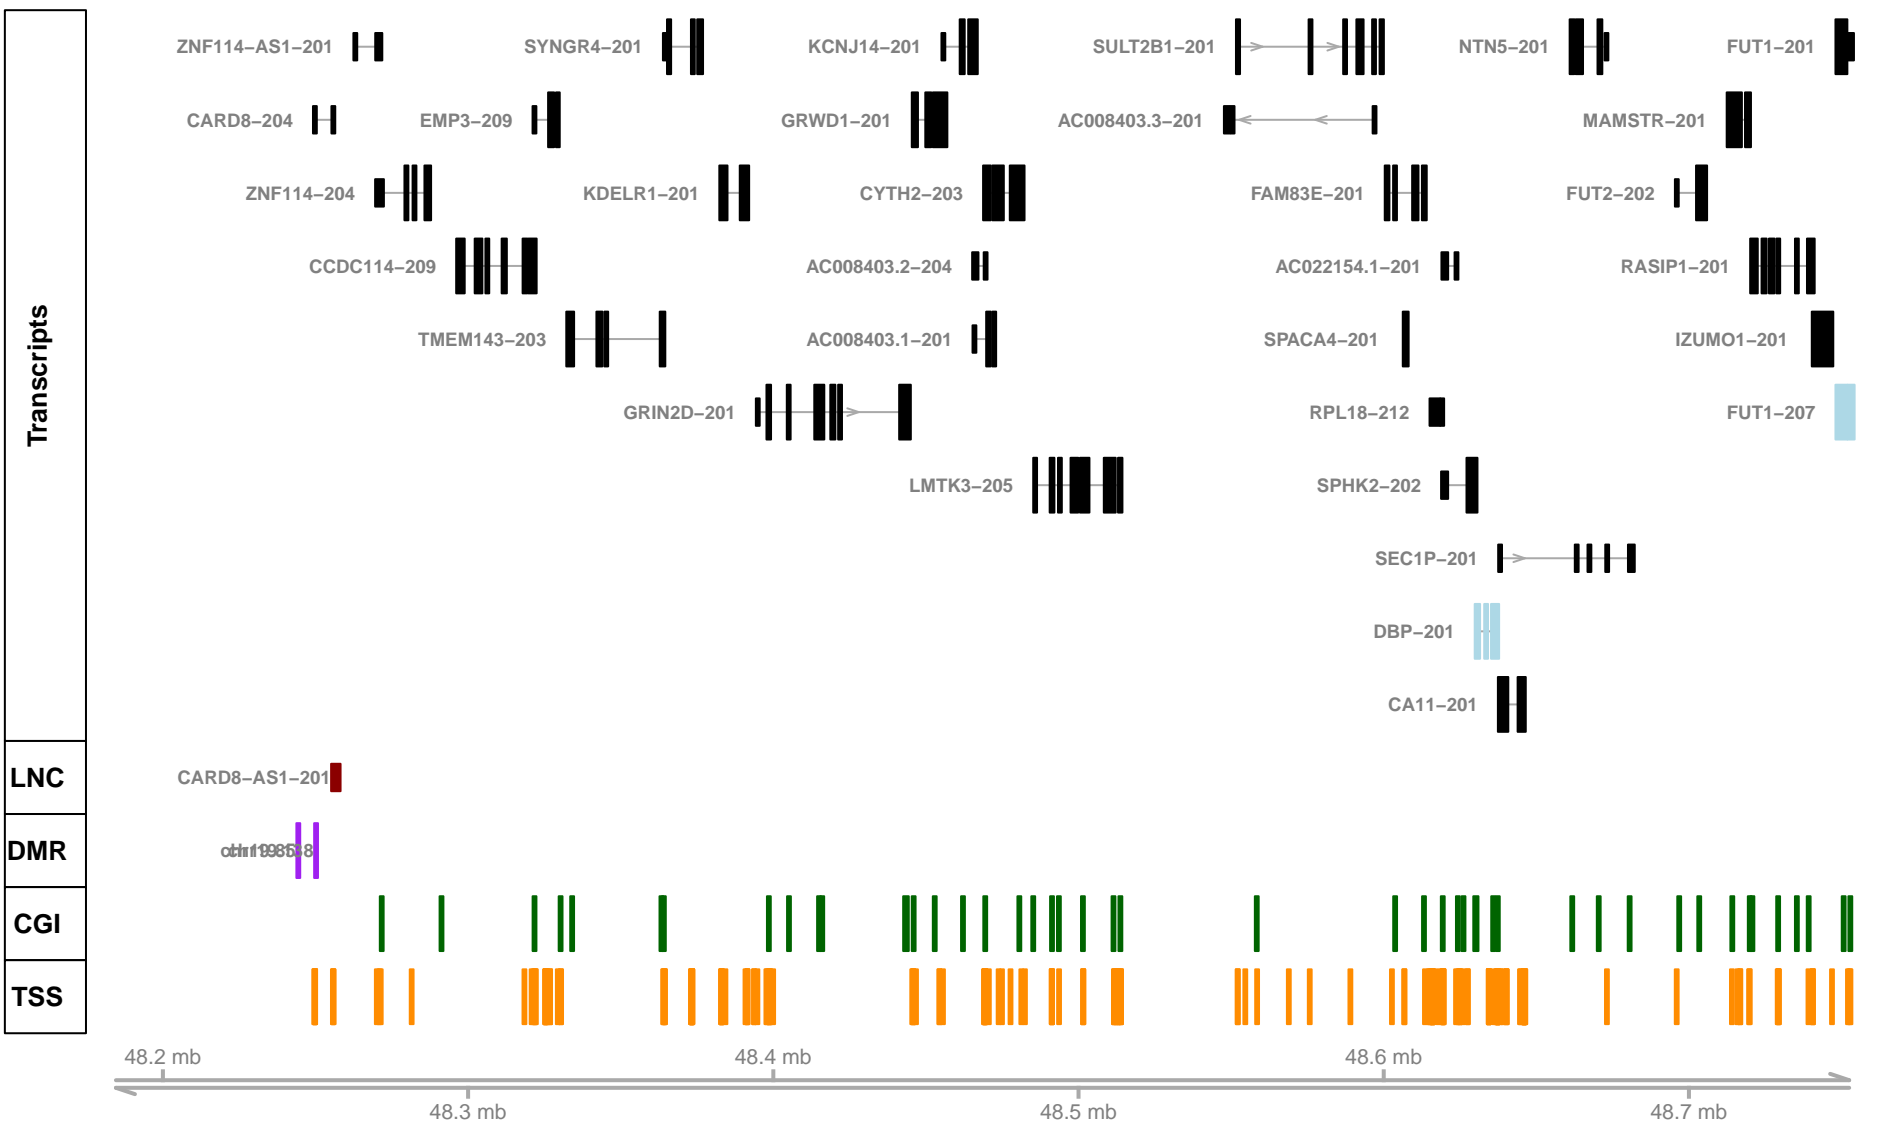

chr19.85

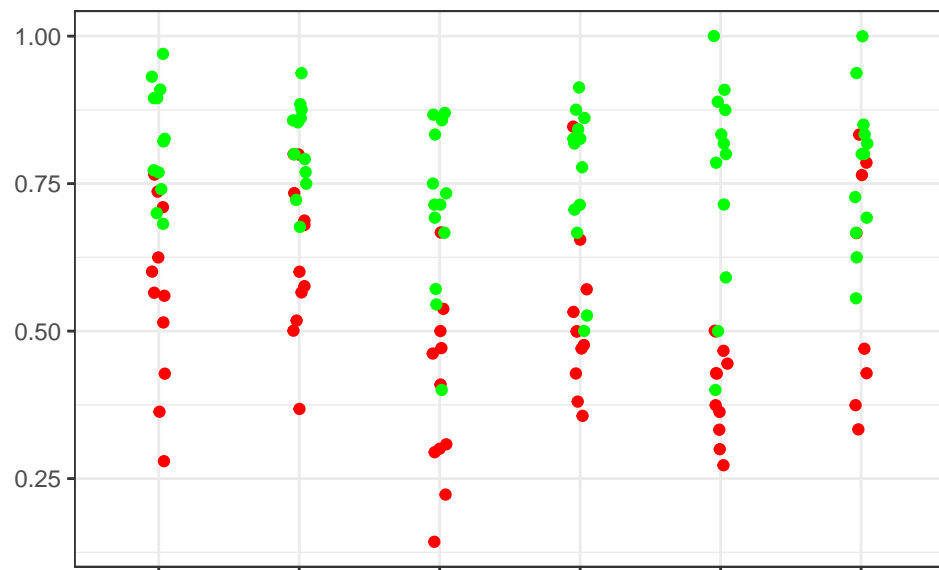

chr19.138

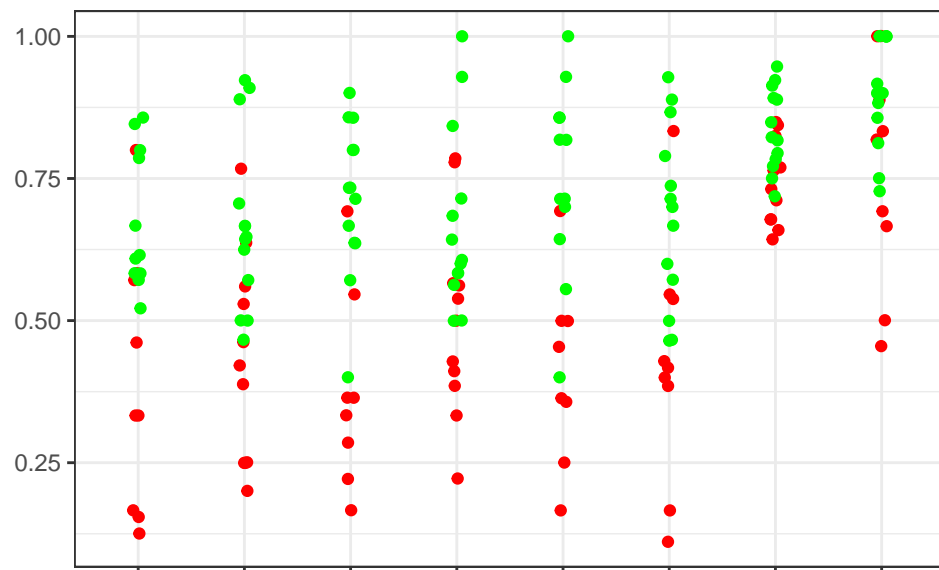

# CD27-AS1

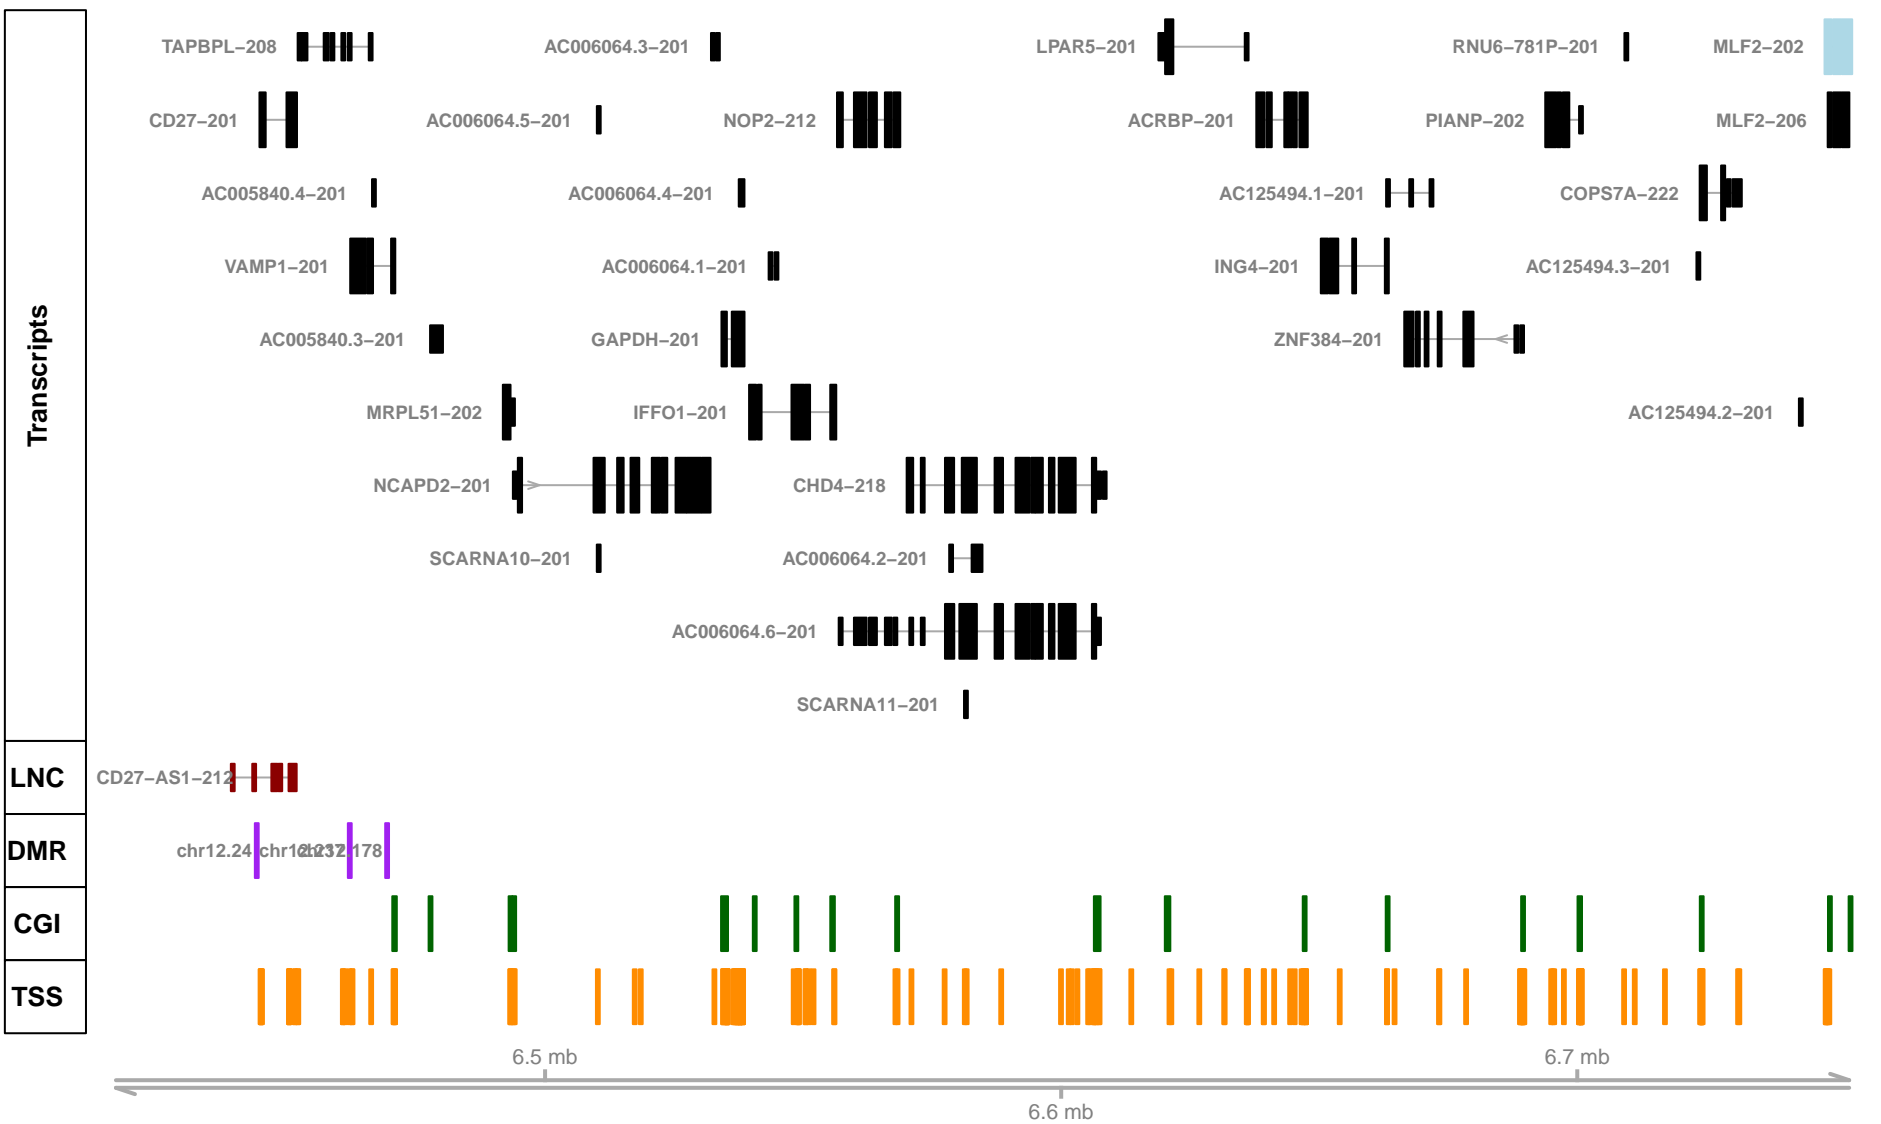

chr12.237

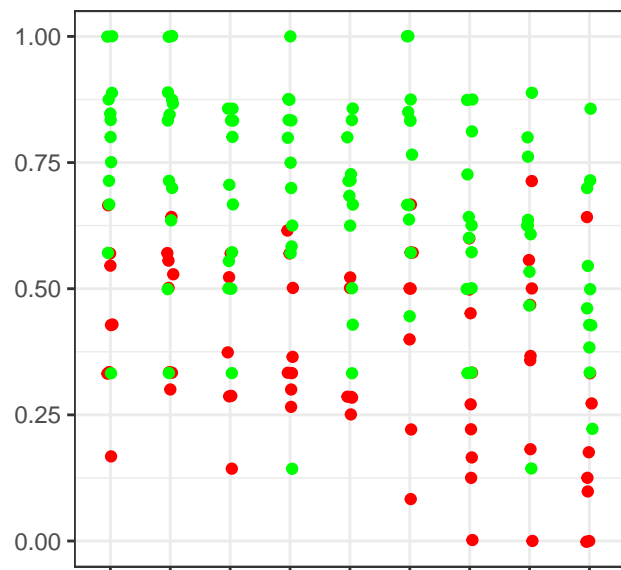

chr12.24

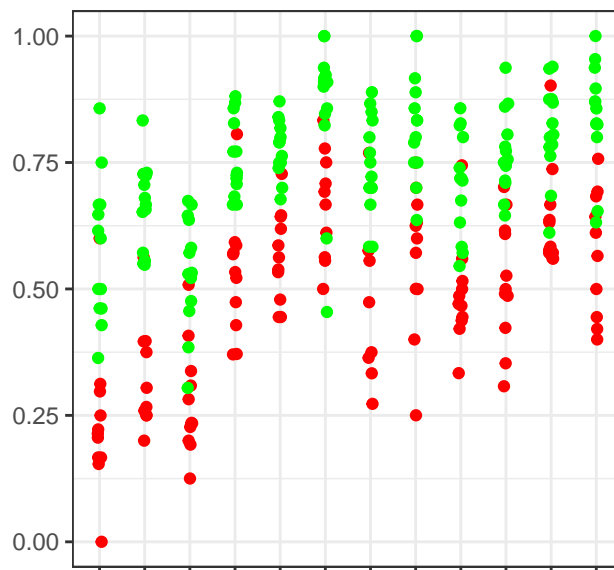

chr12.178

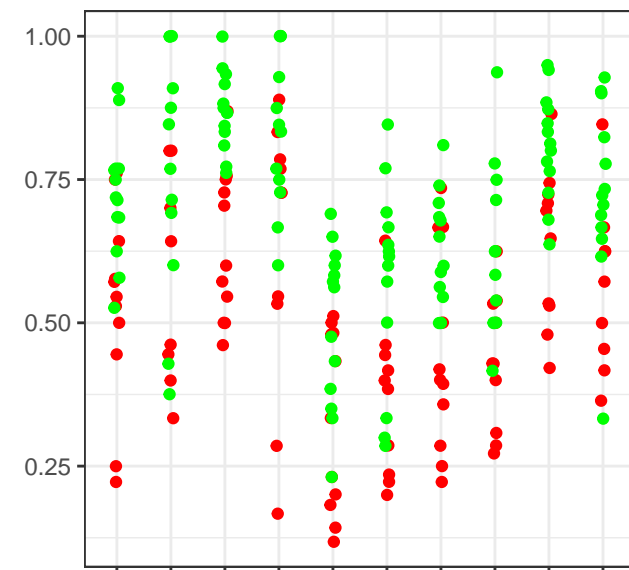

# CYP2U1-AS1

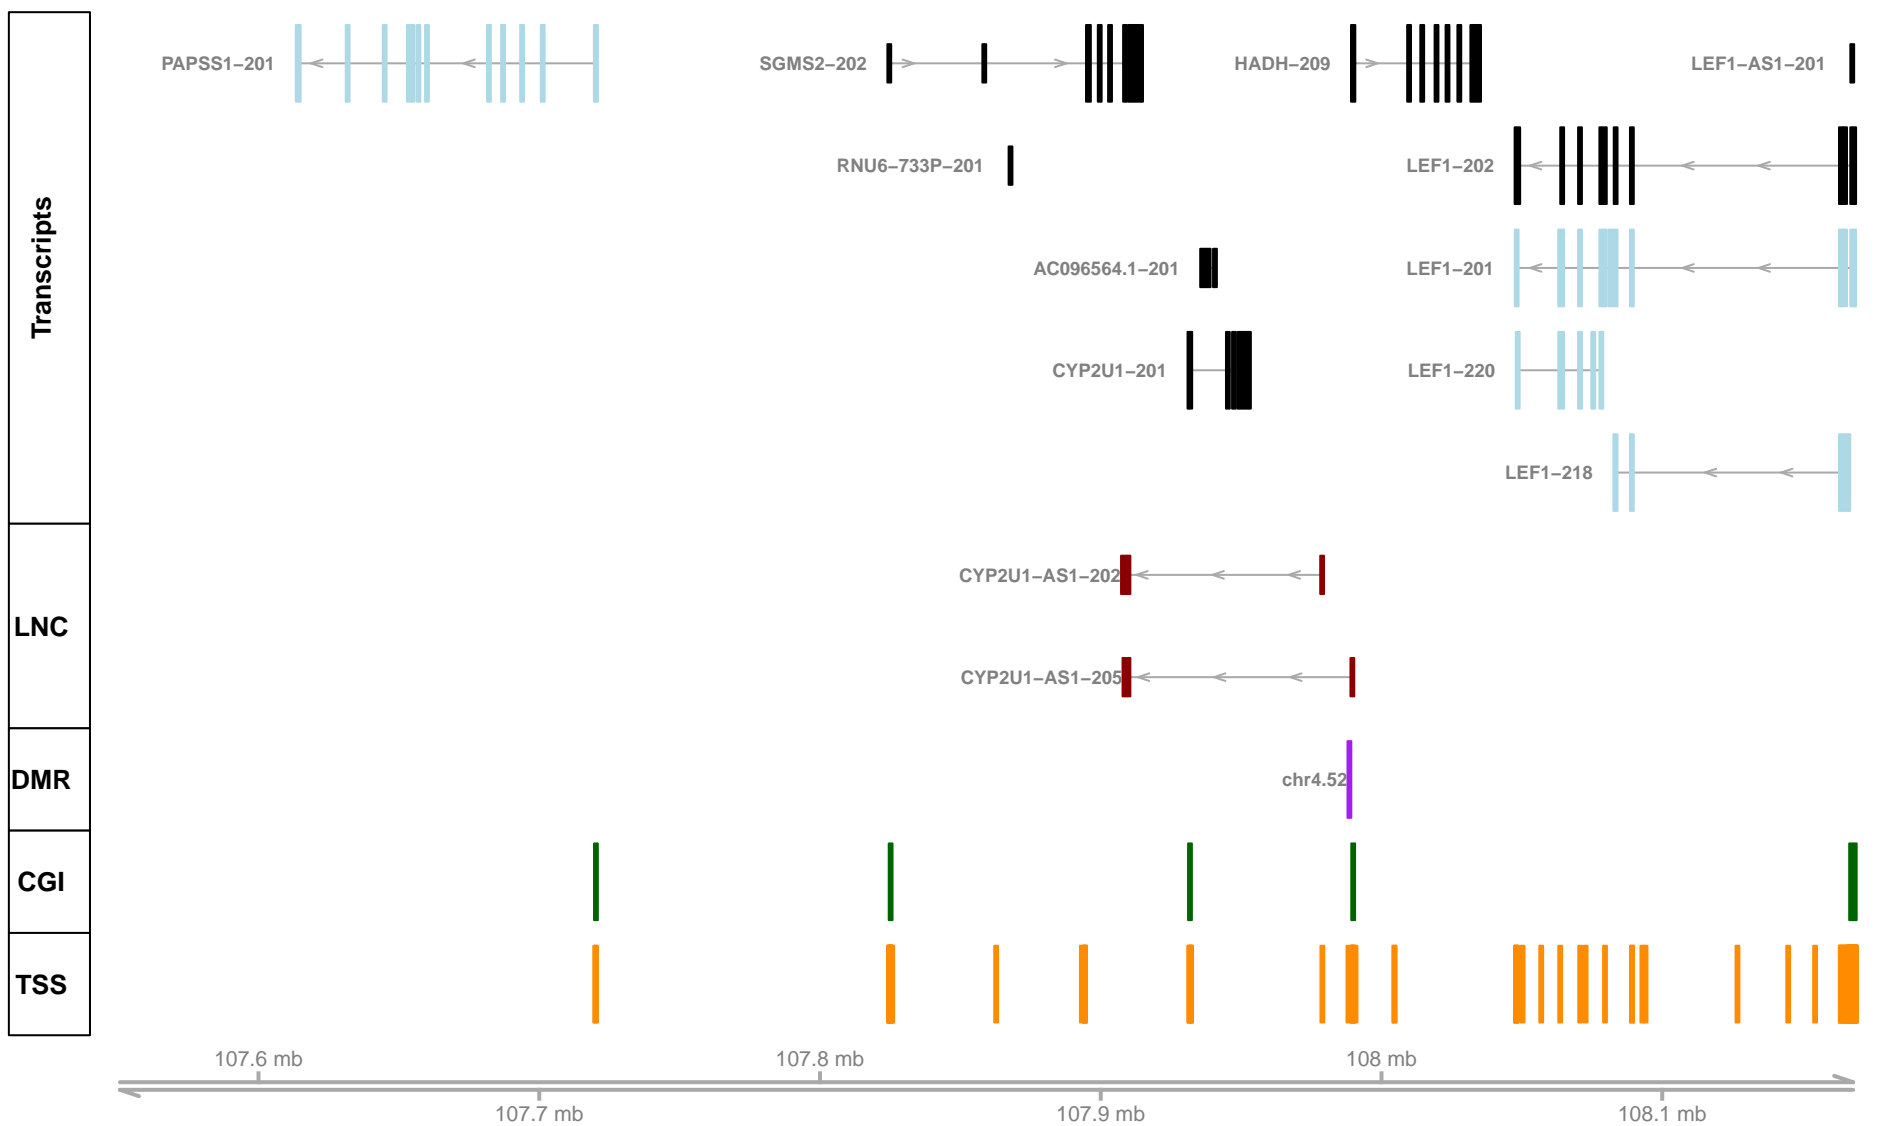

## chr4.52

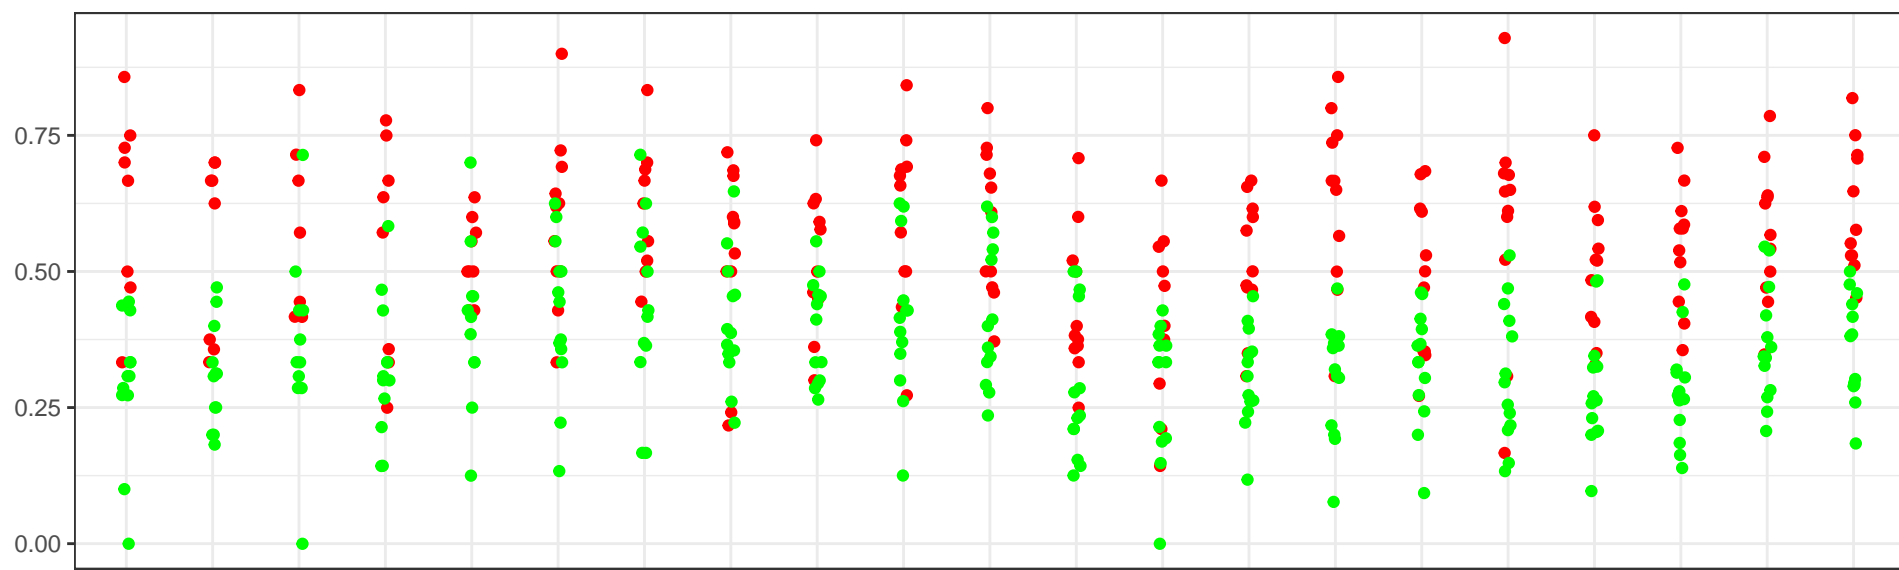

# CYTOR

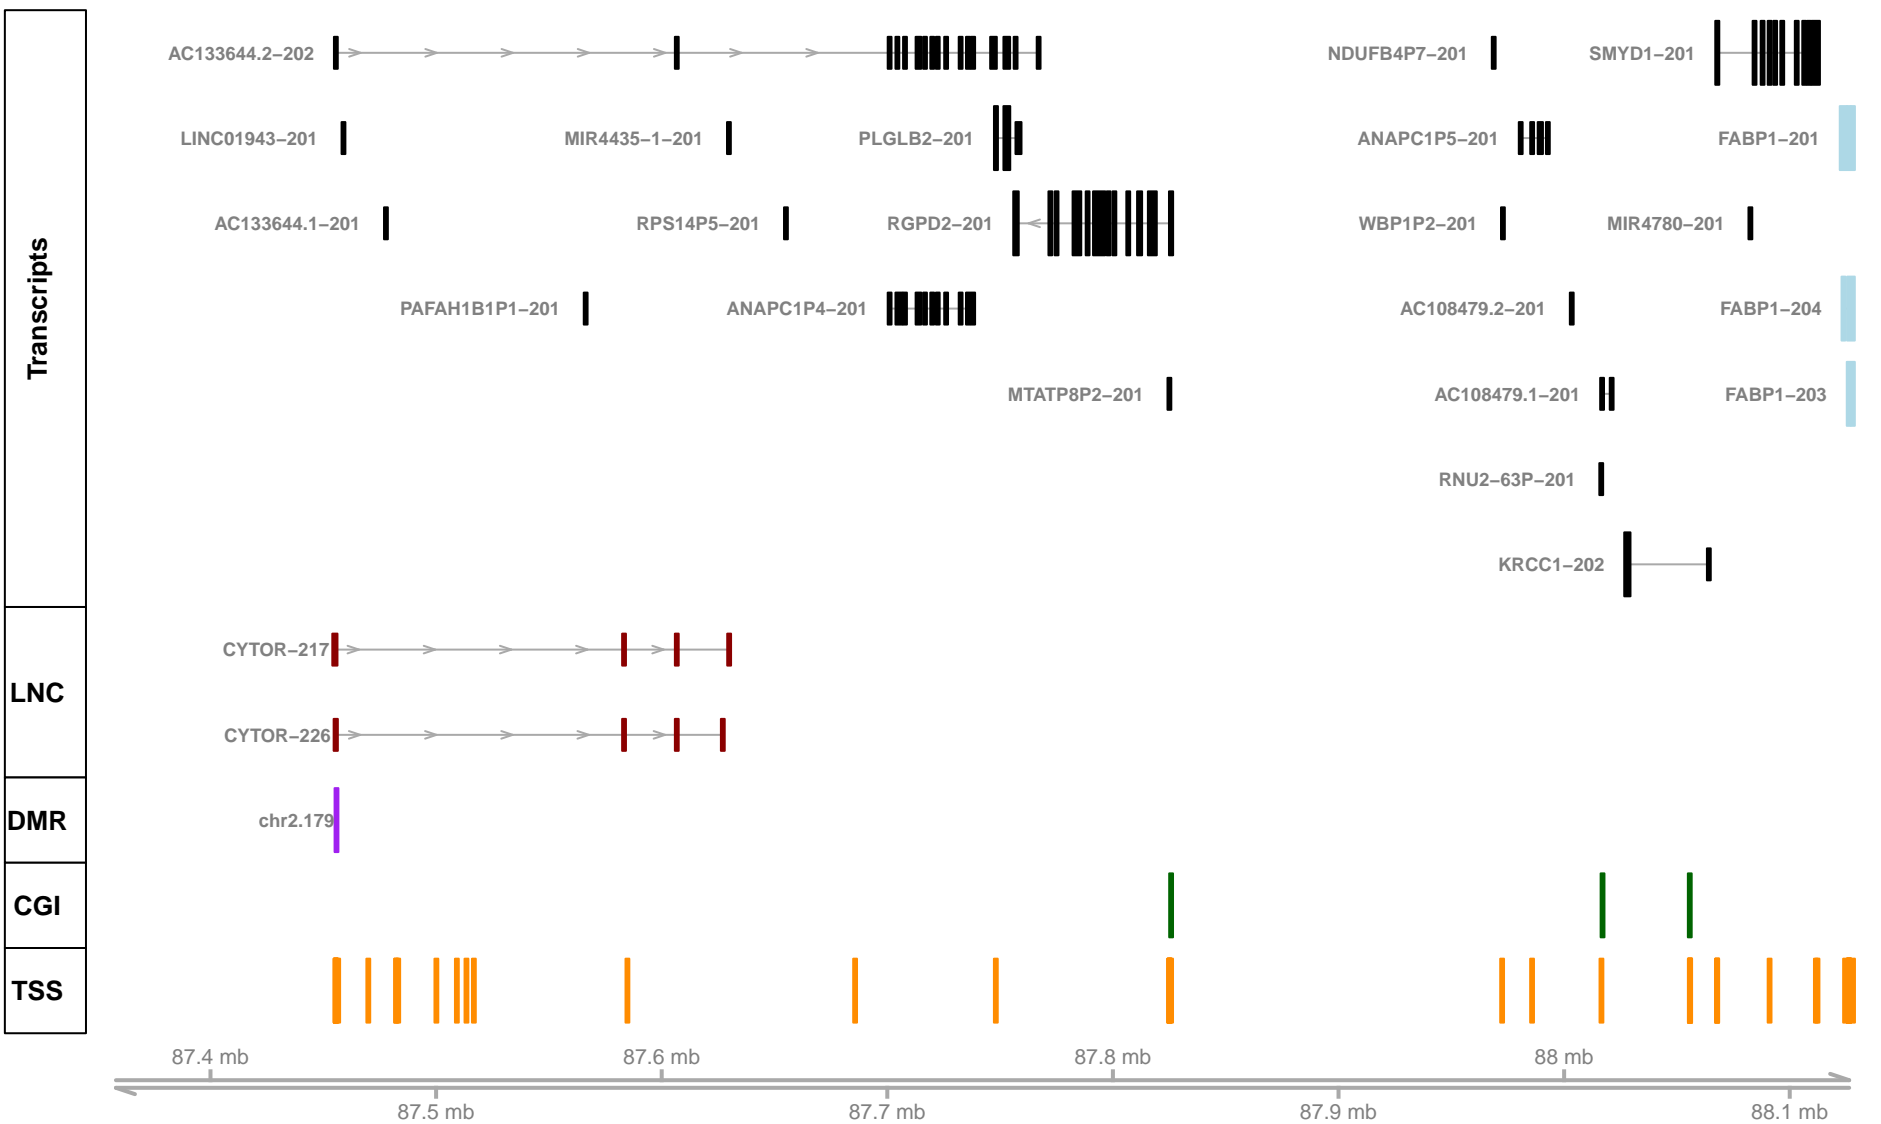

## chr2.179

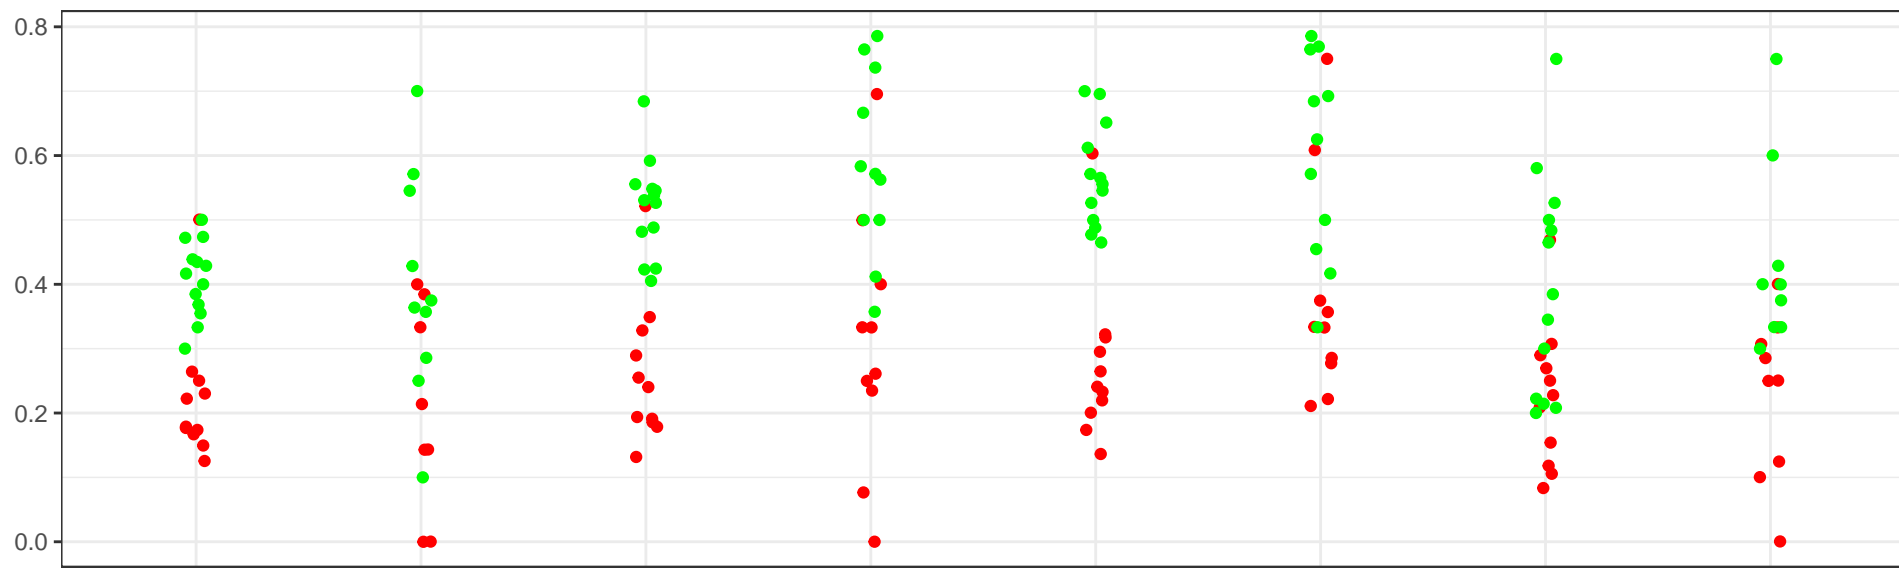

# DELEC1

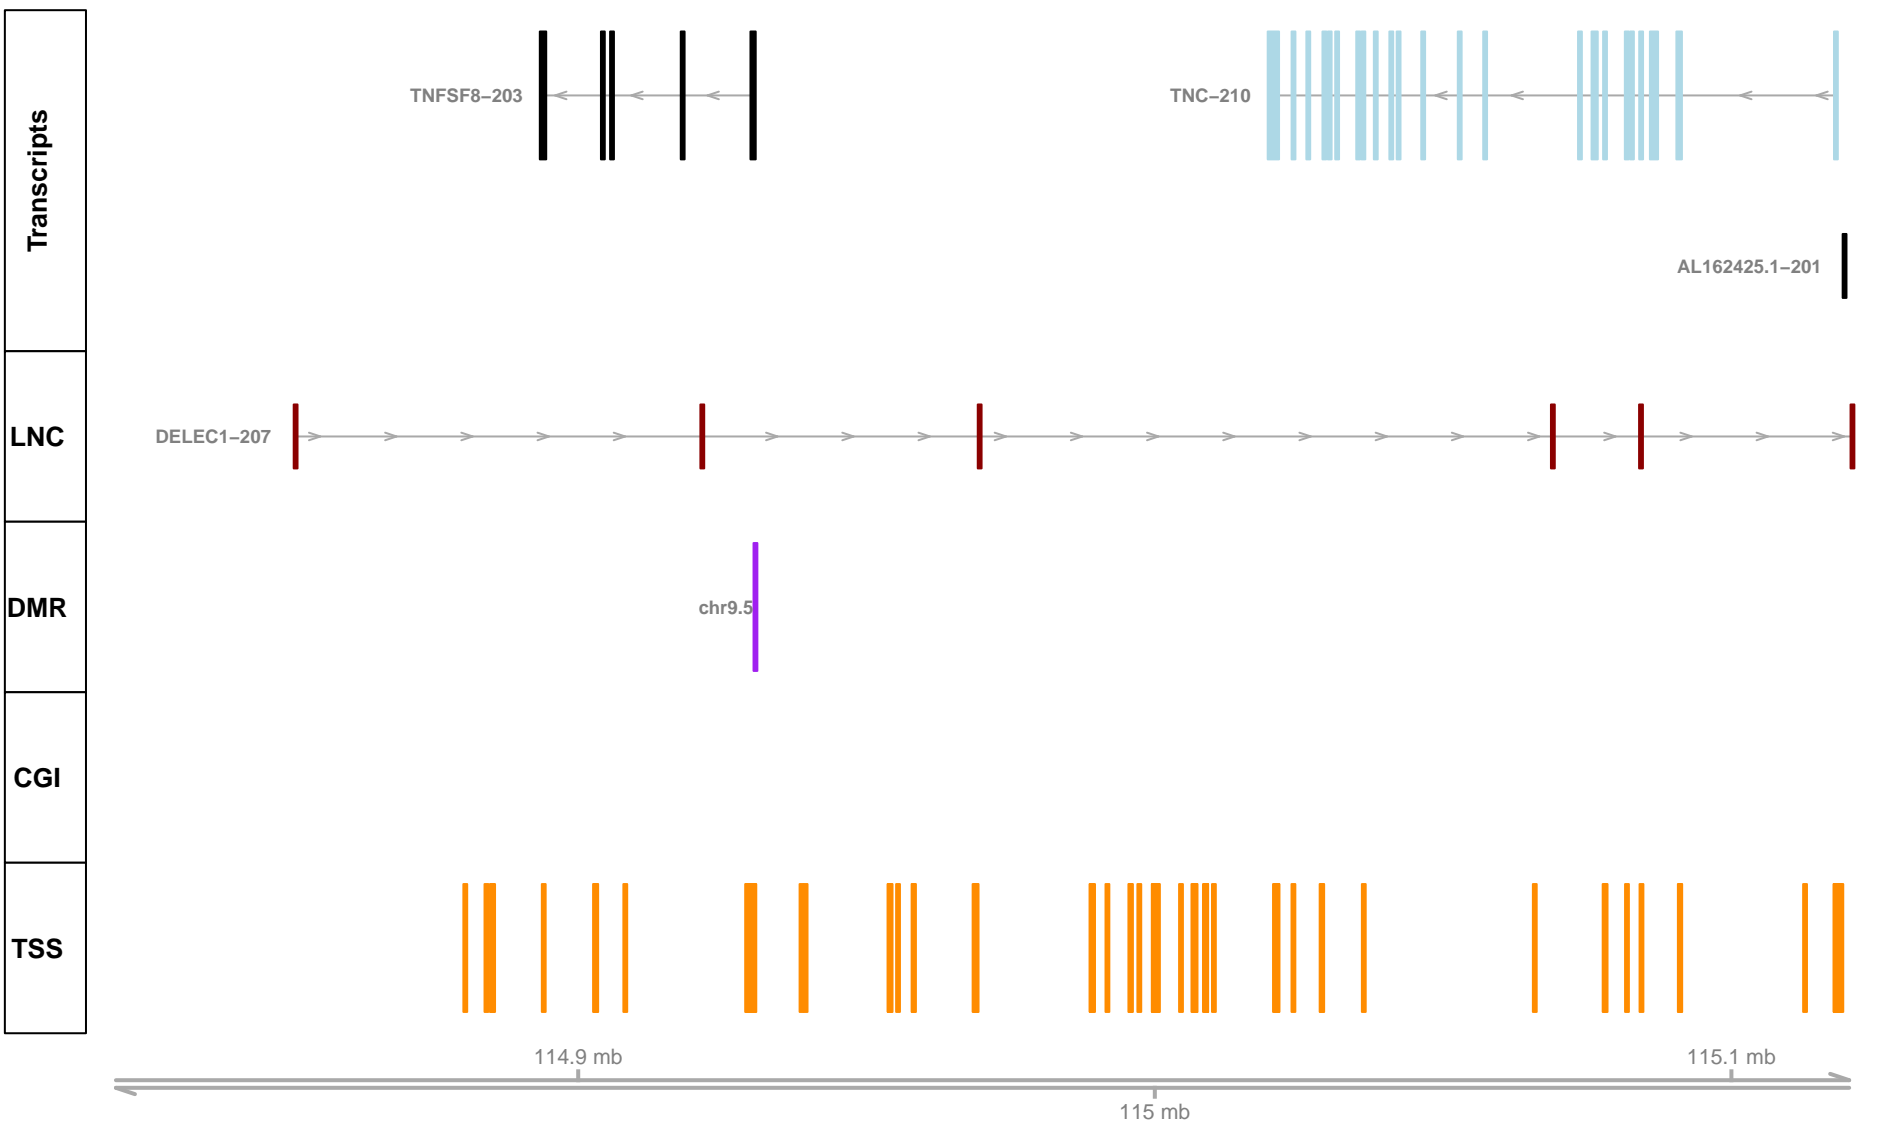

## chr9.5

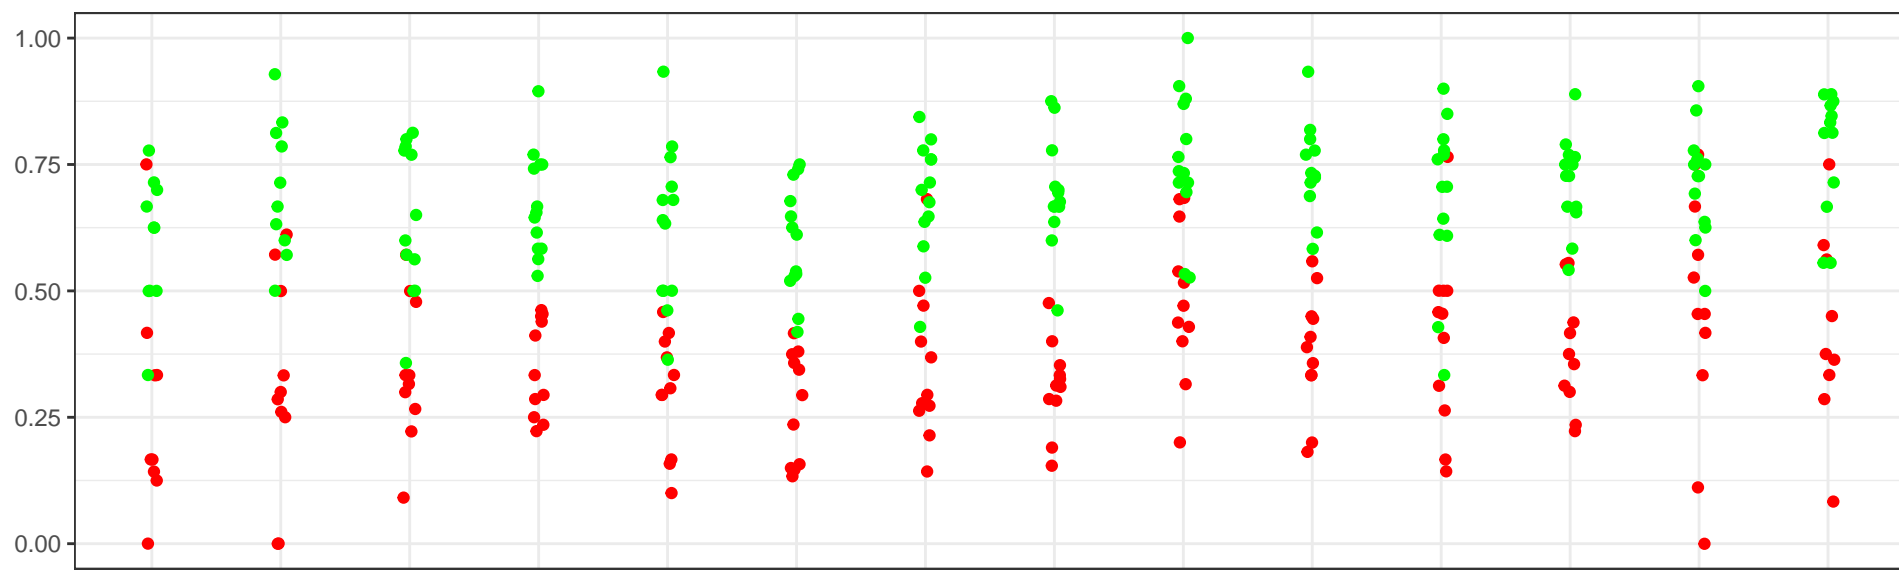

# DRAIC

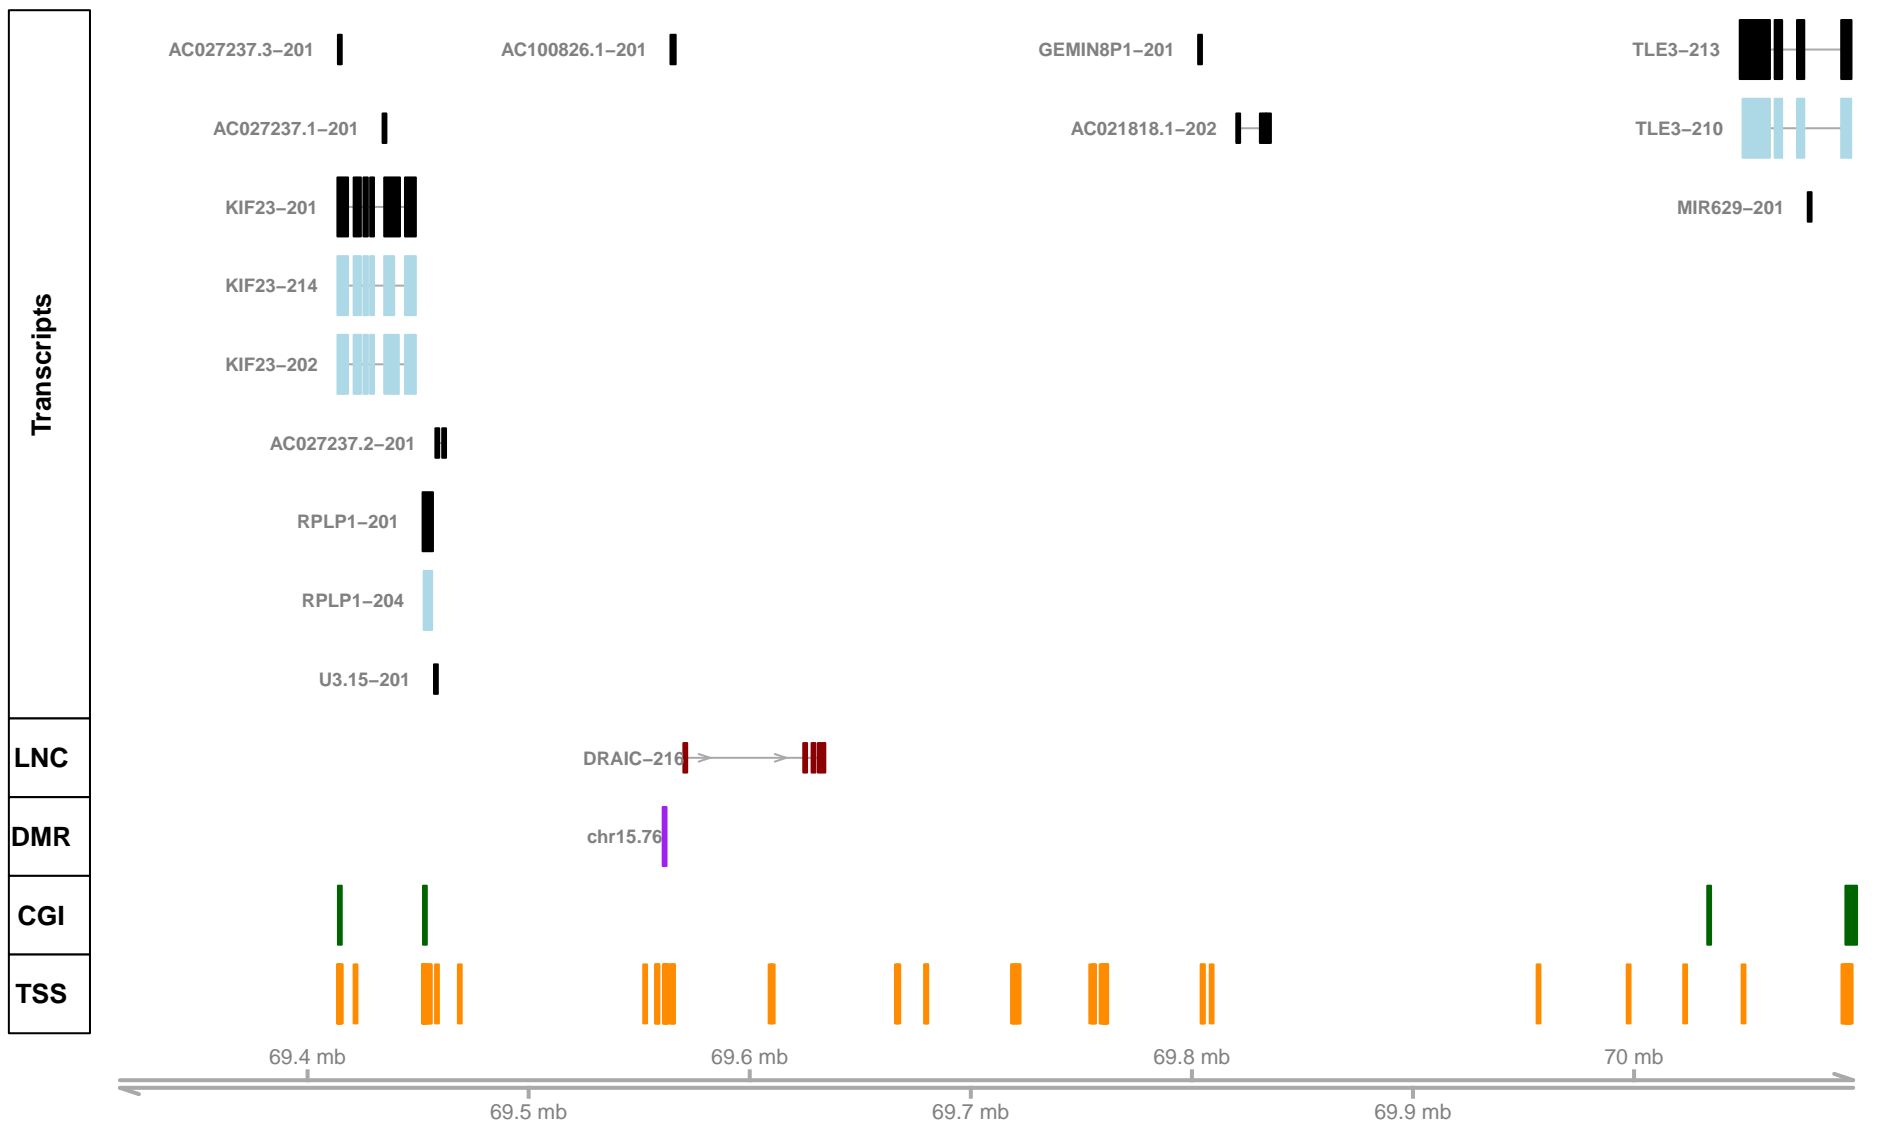

## chr15.76

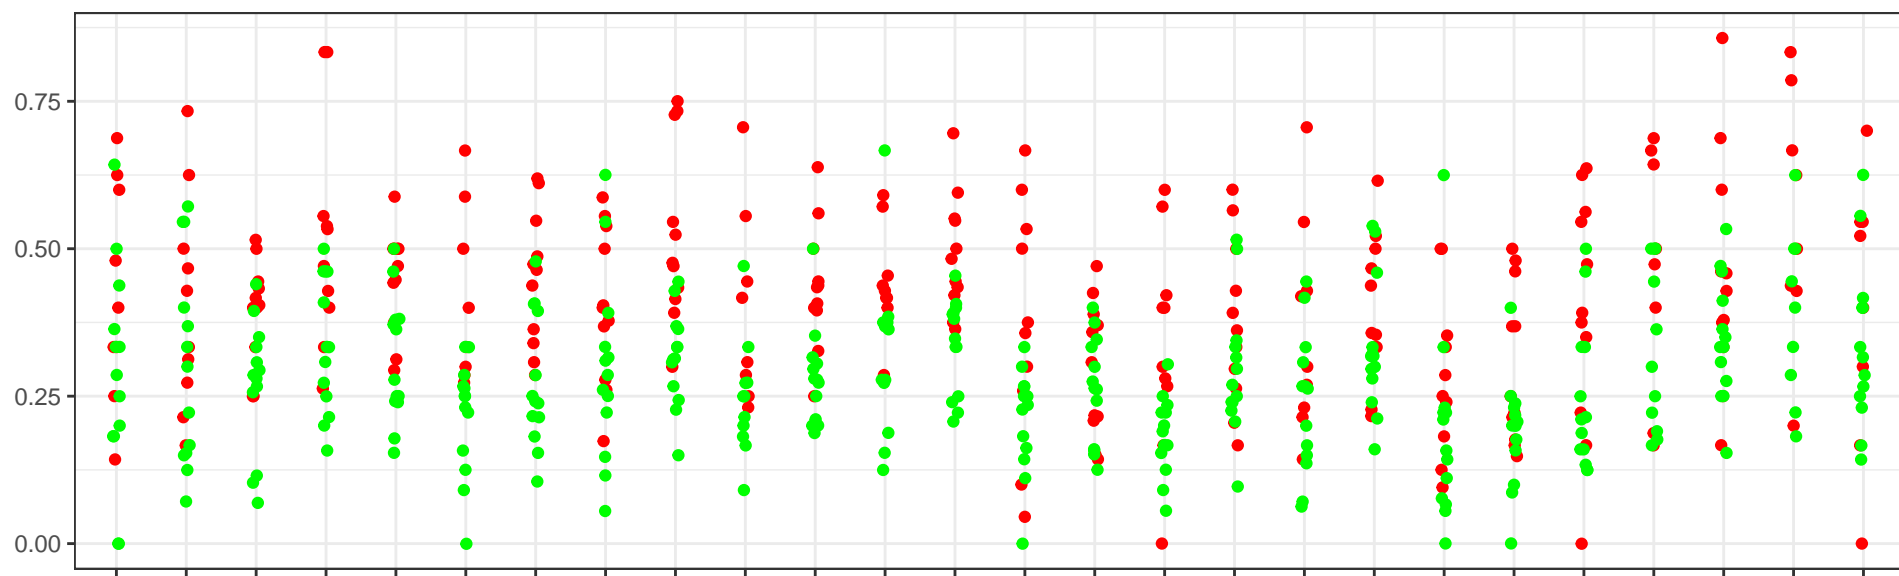

# EPCAM-DT

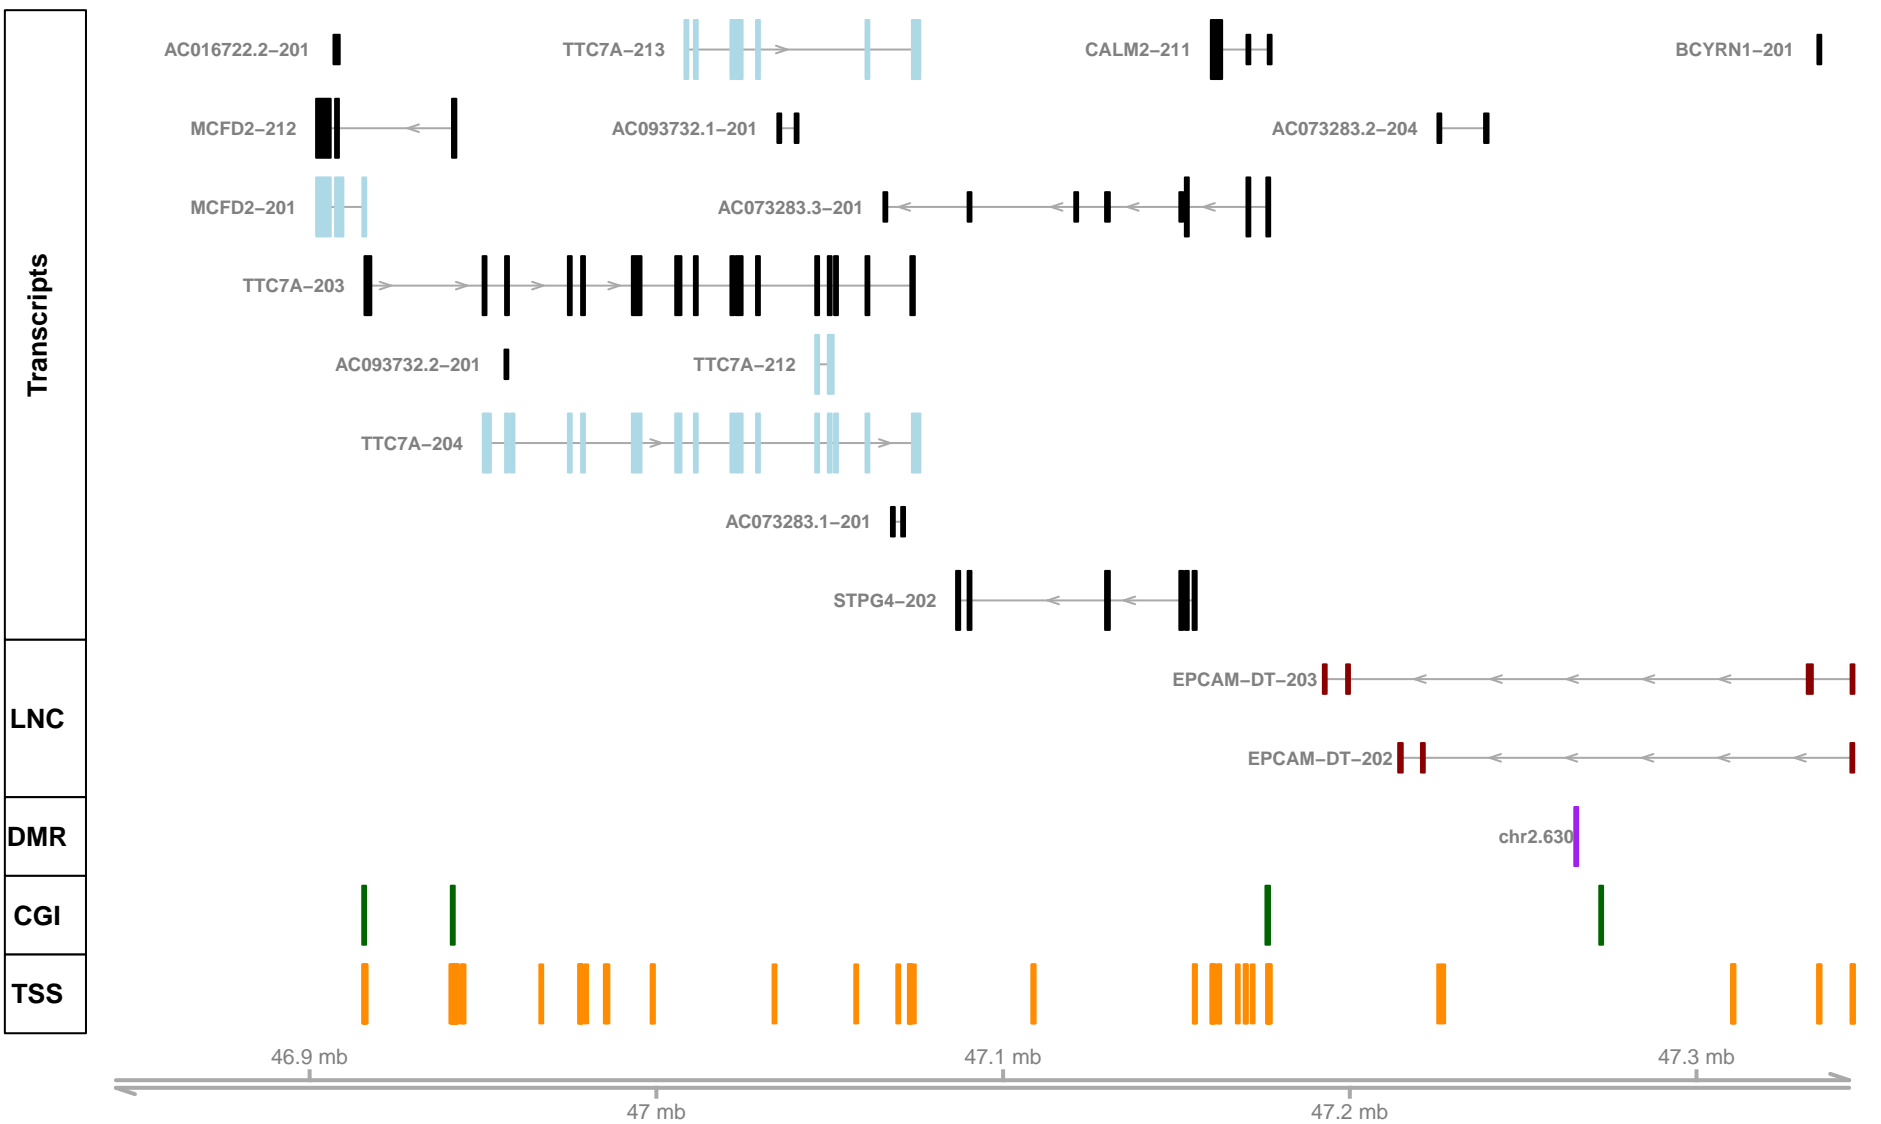

chr2.630

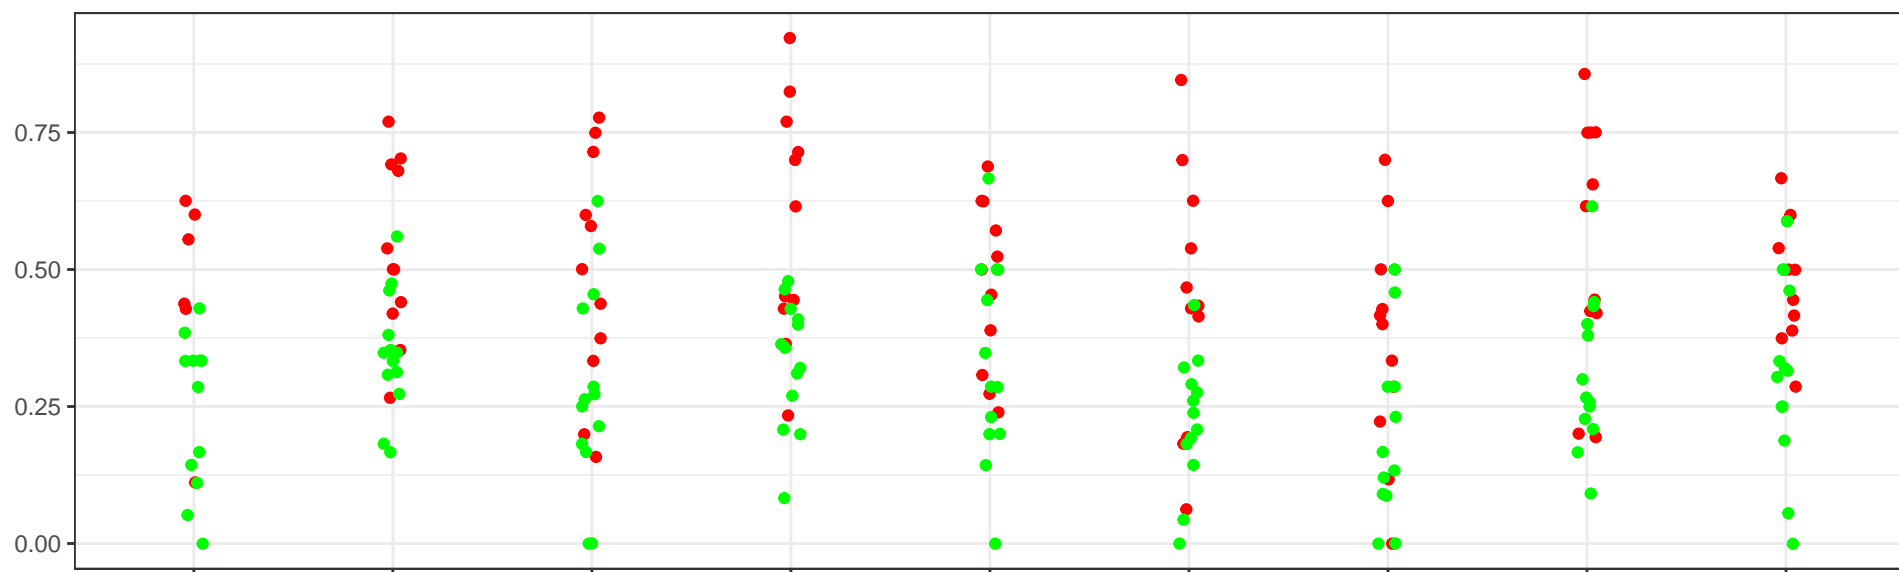

FOXD2-AS1

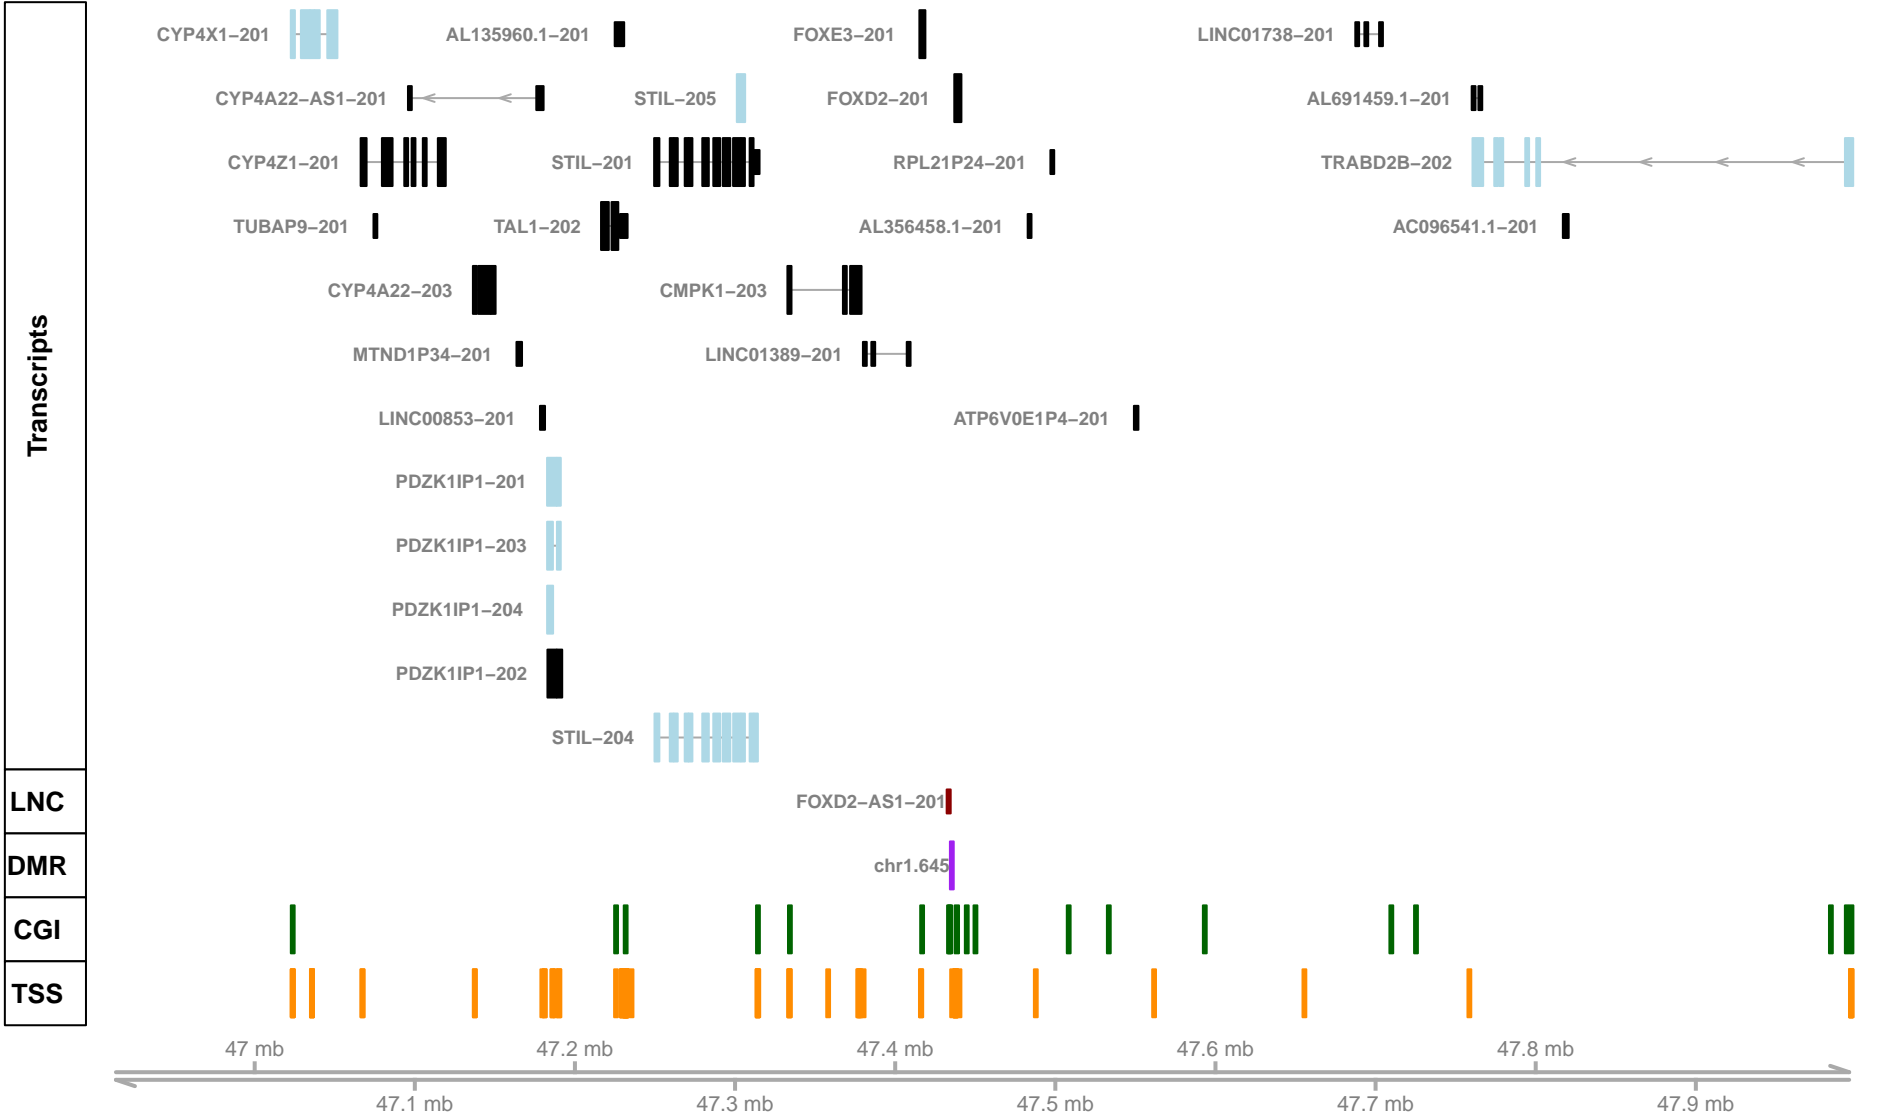

chr1.645

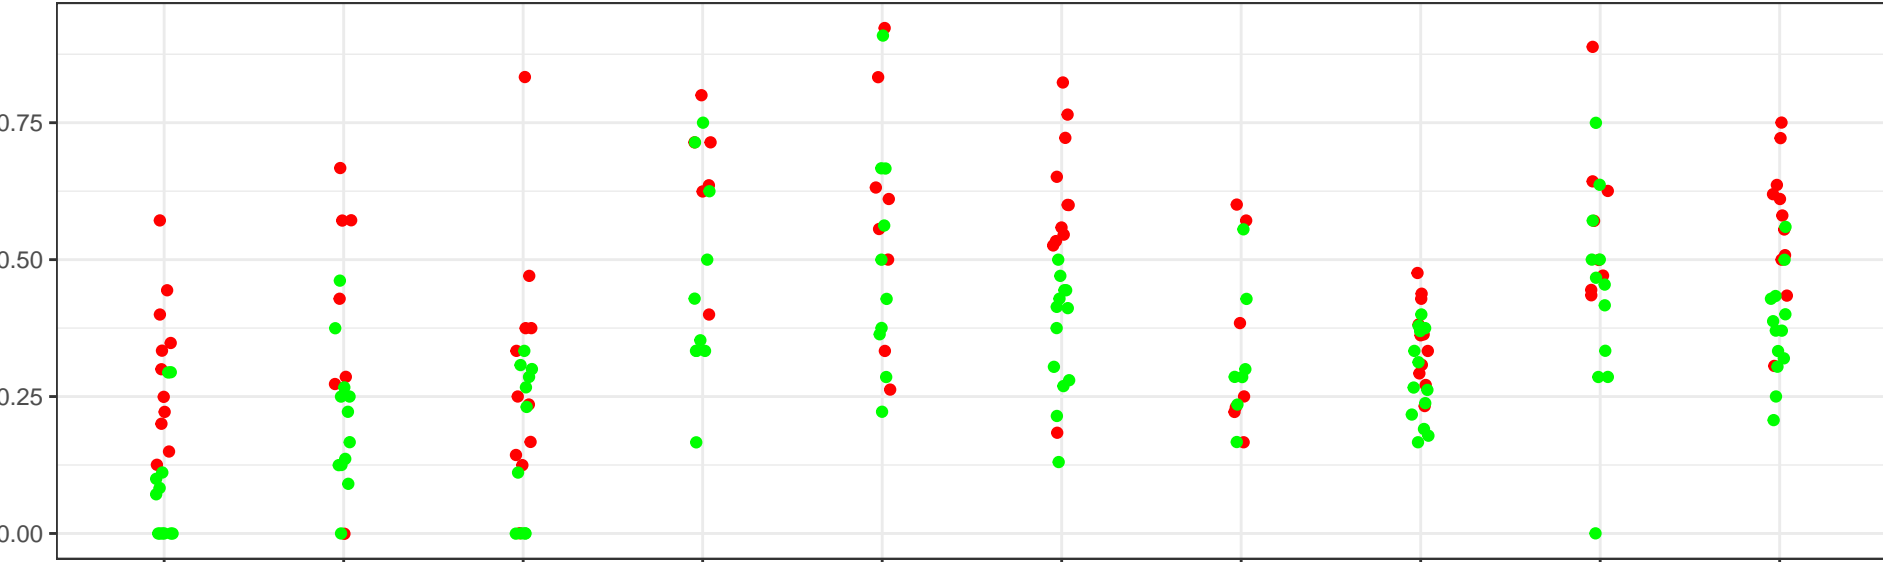

GCSIR

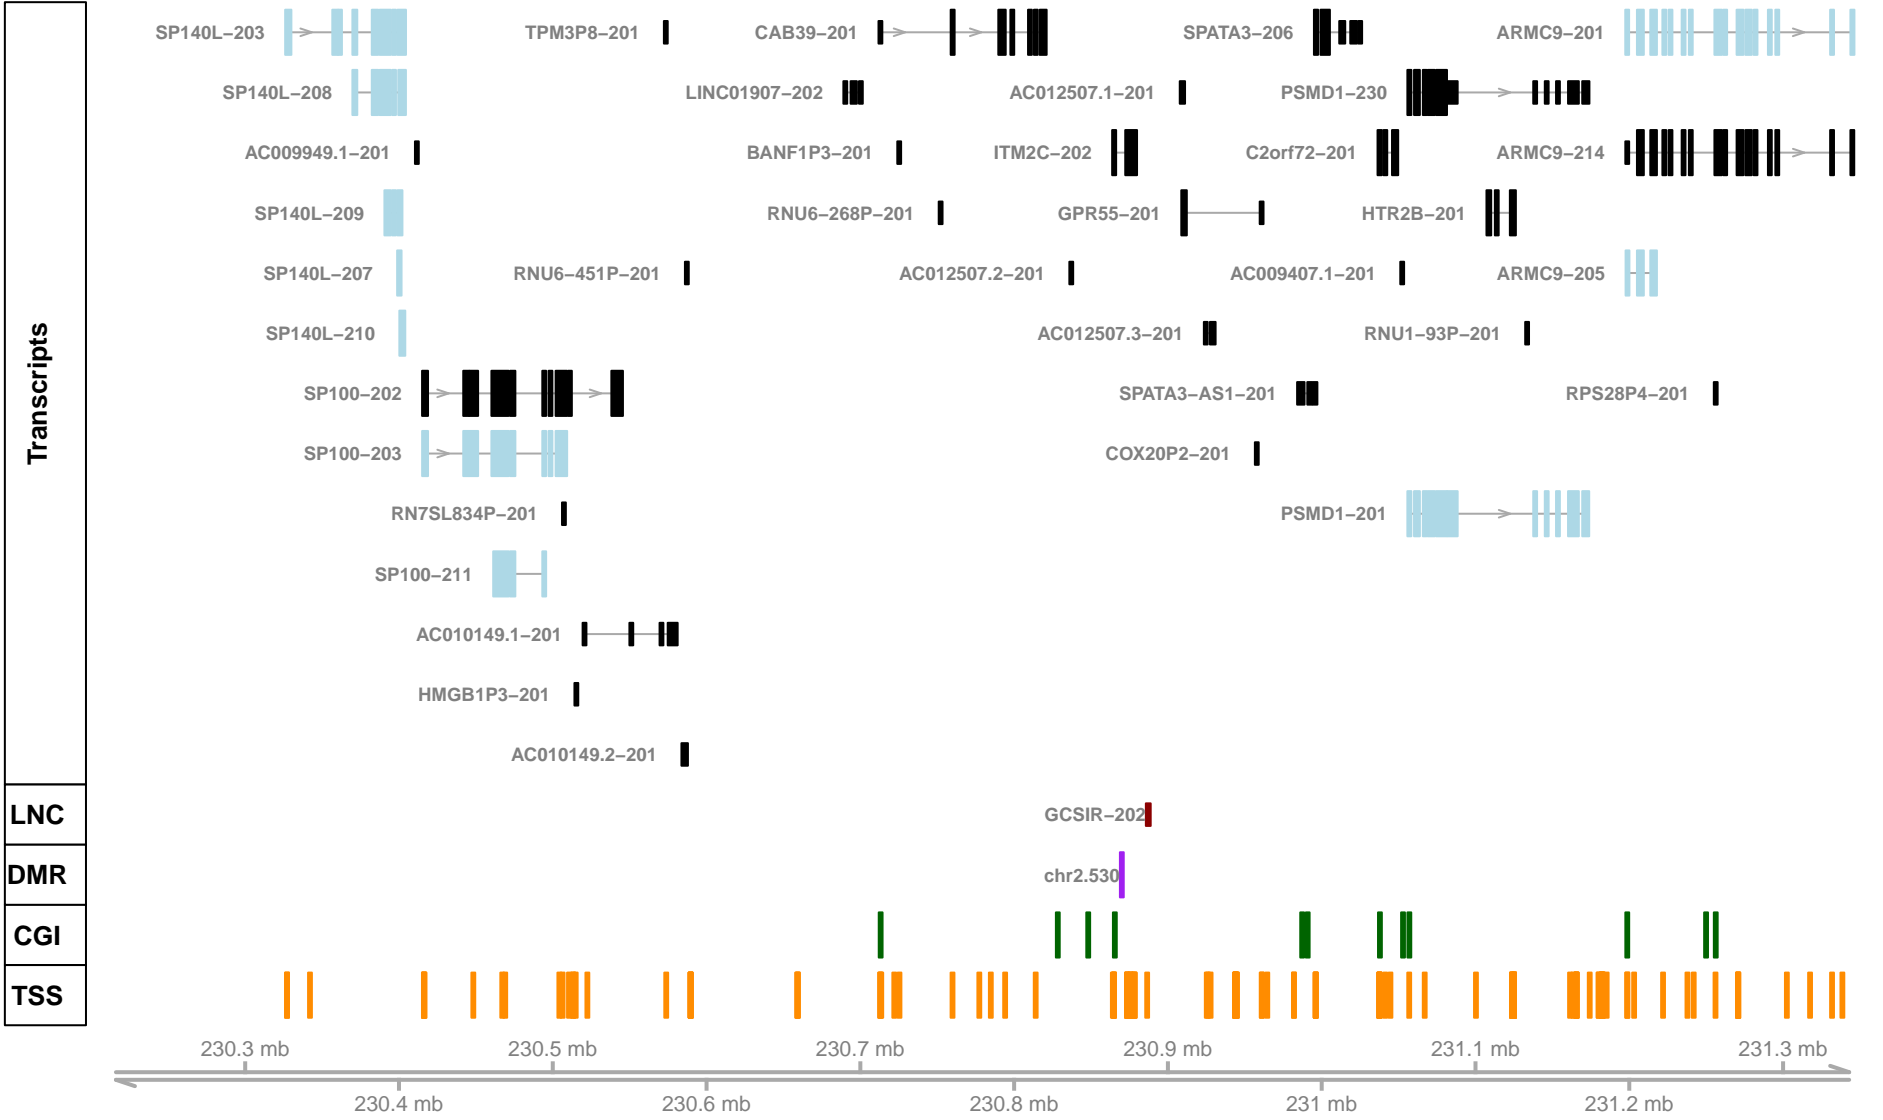

chr2.530

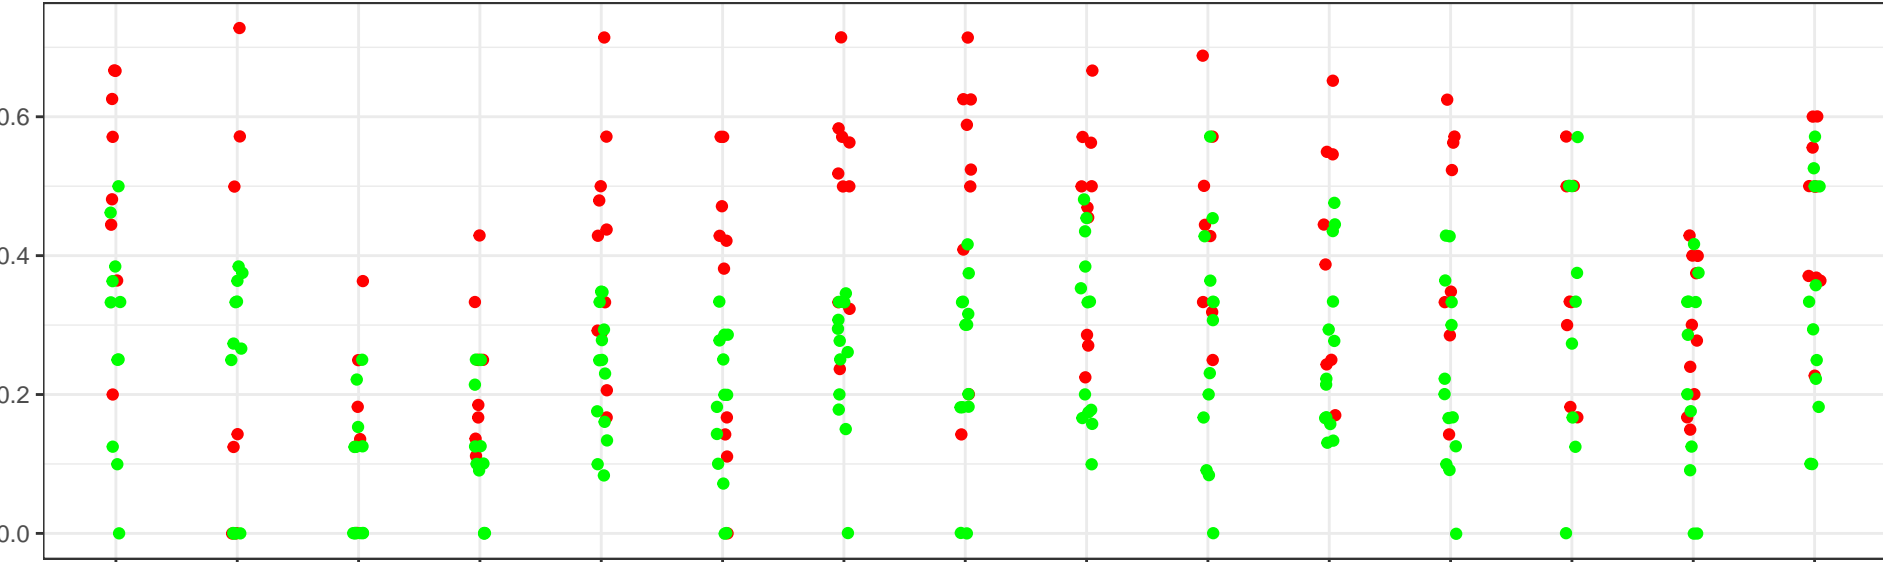

# GMDS-DT

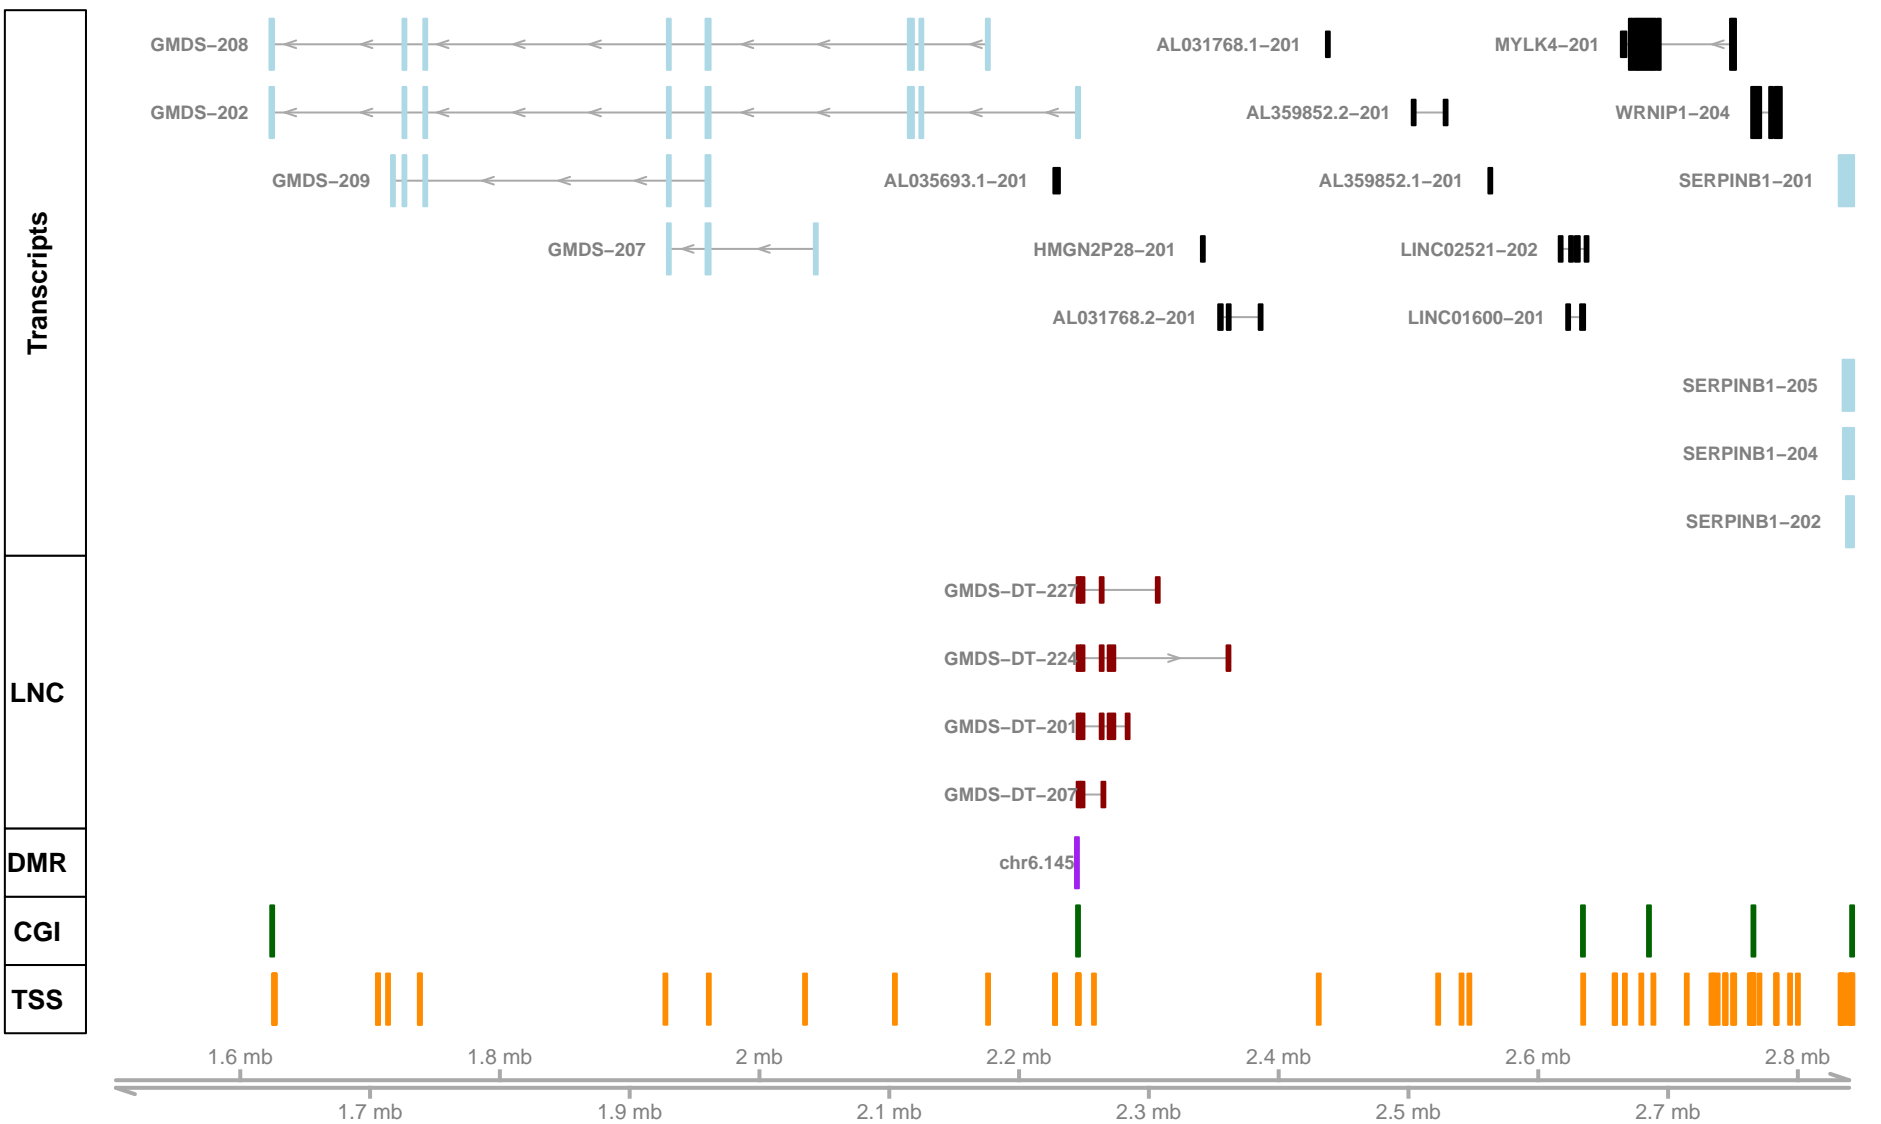

## chr6.145

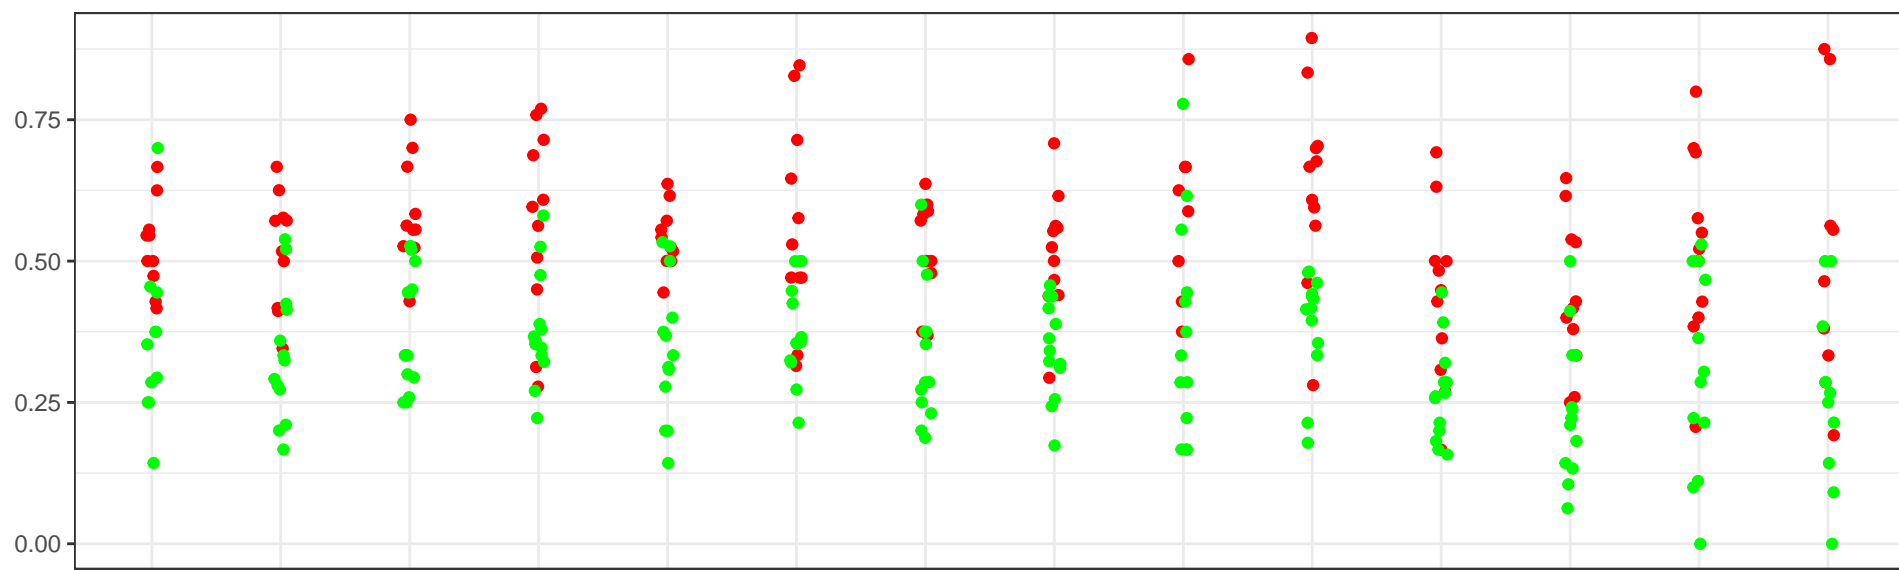

# IL6-AS1

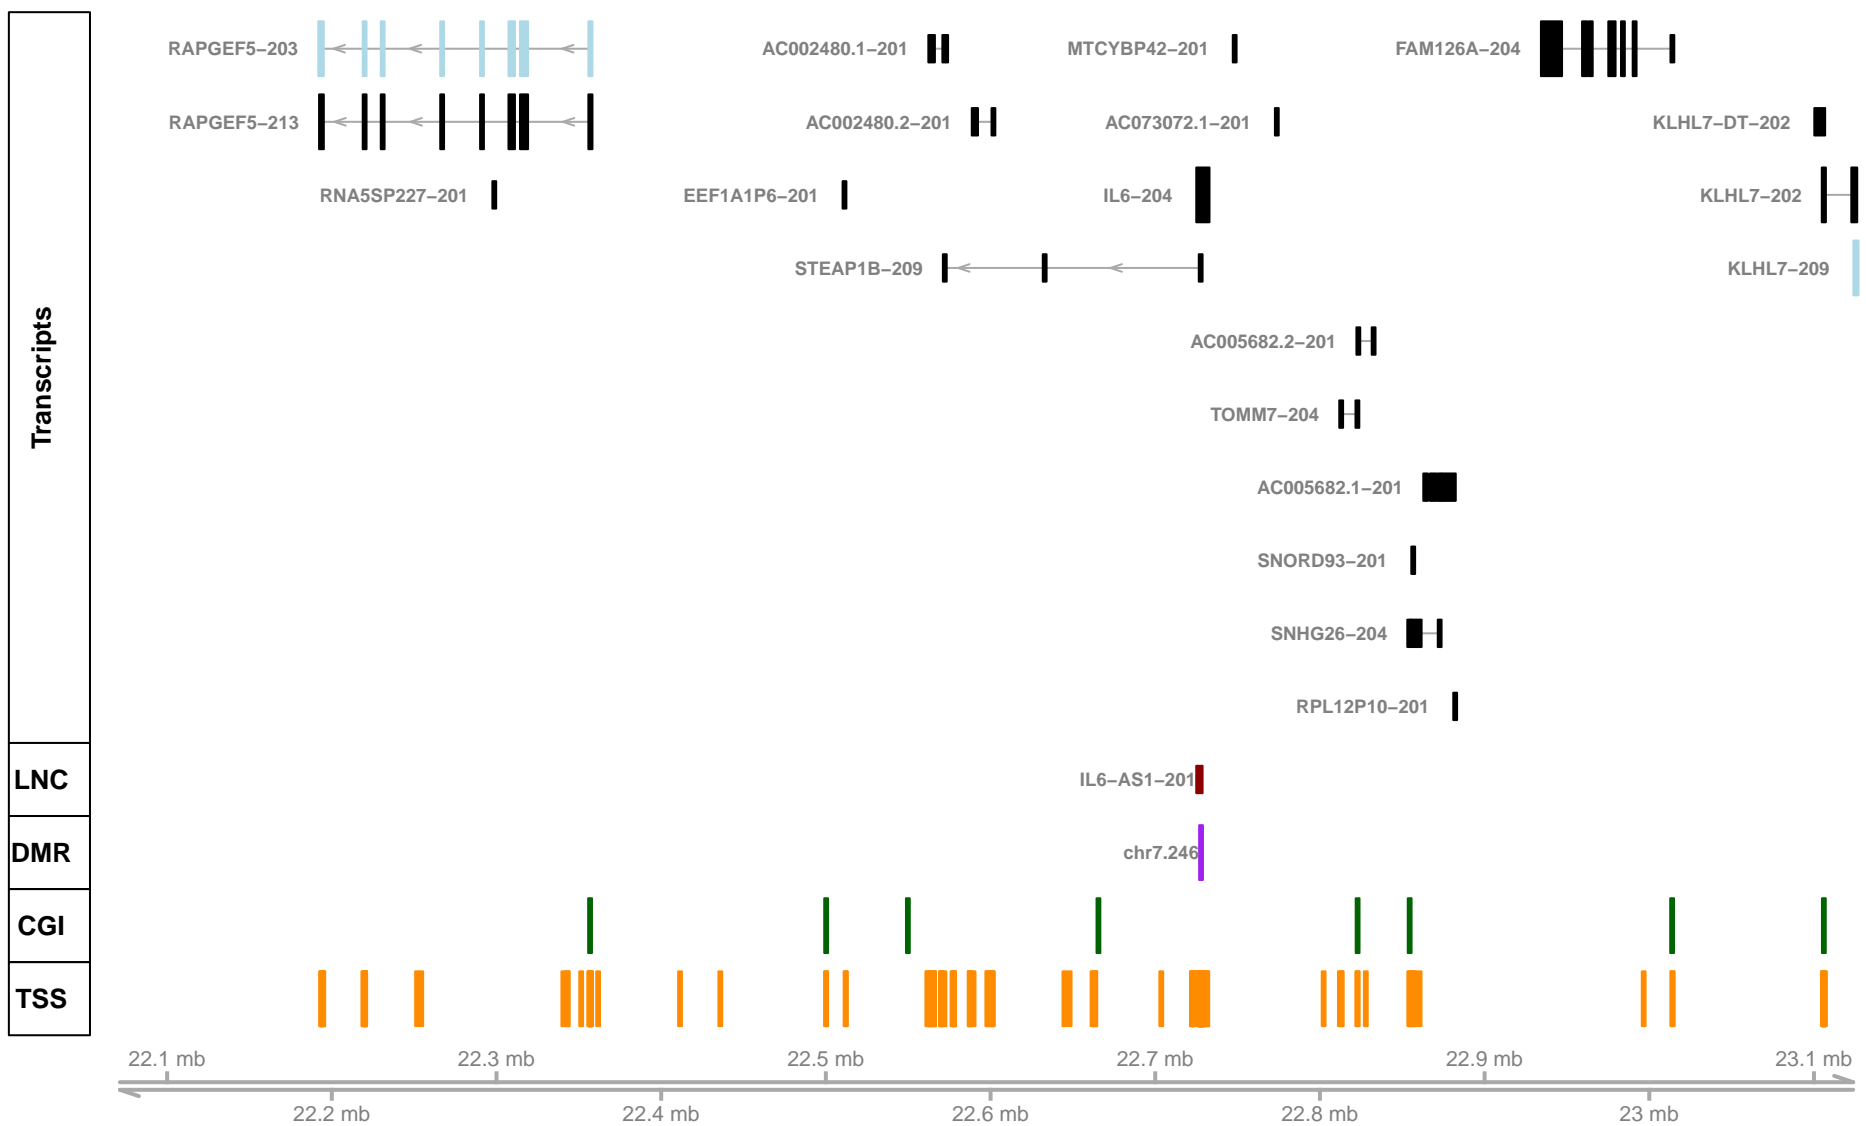

## chr7.246

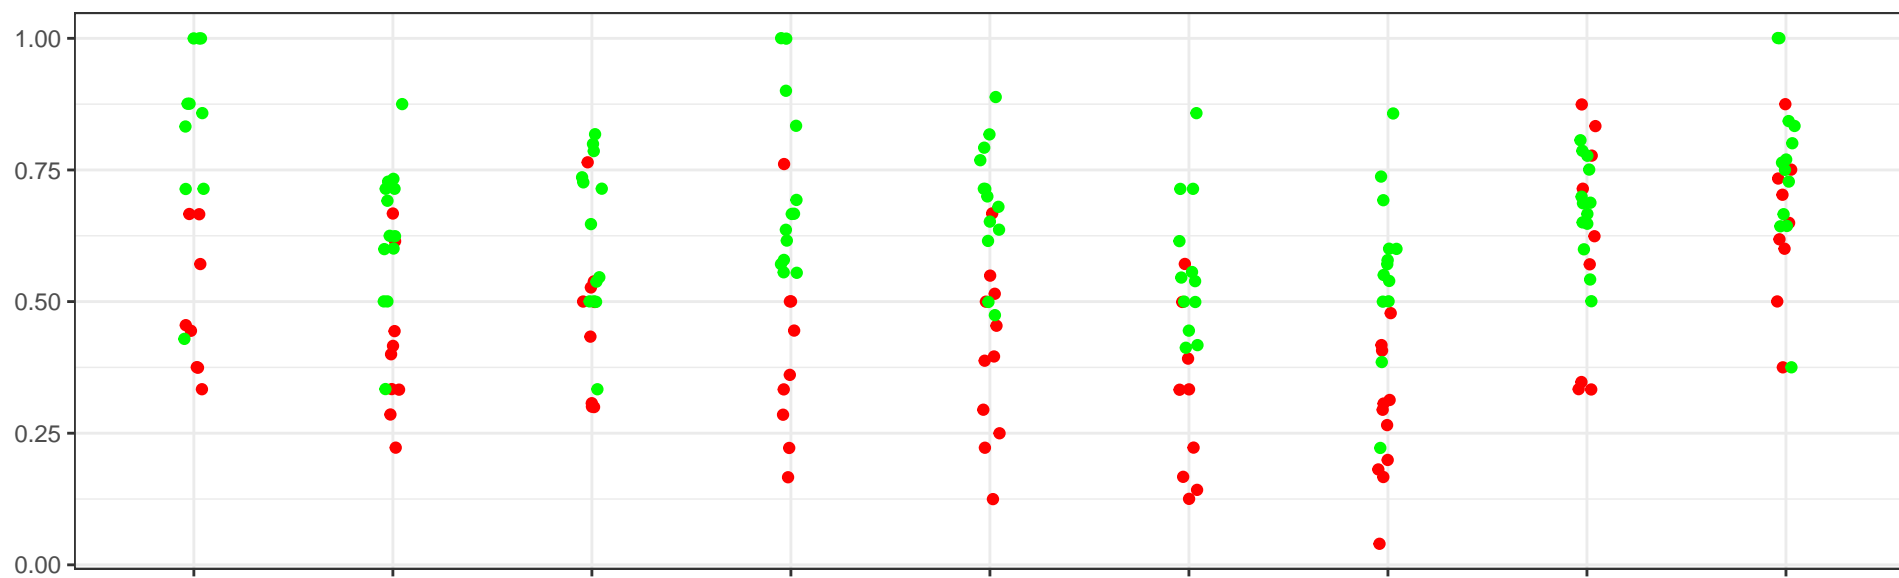

# IRF1-AS1

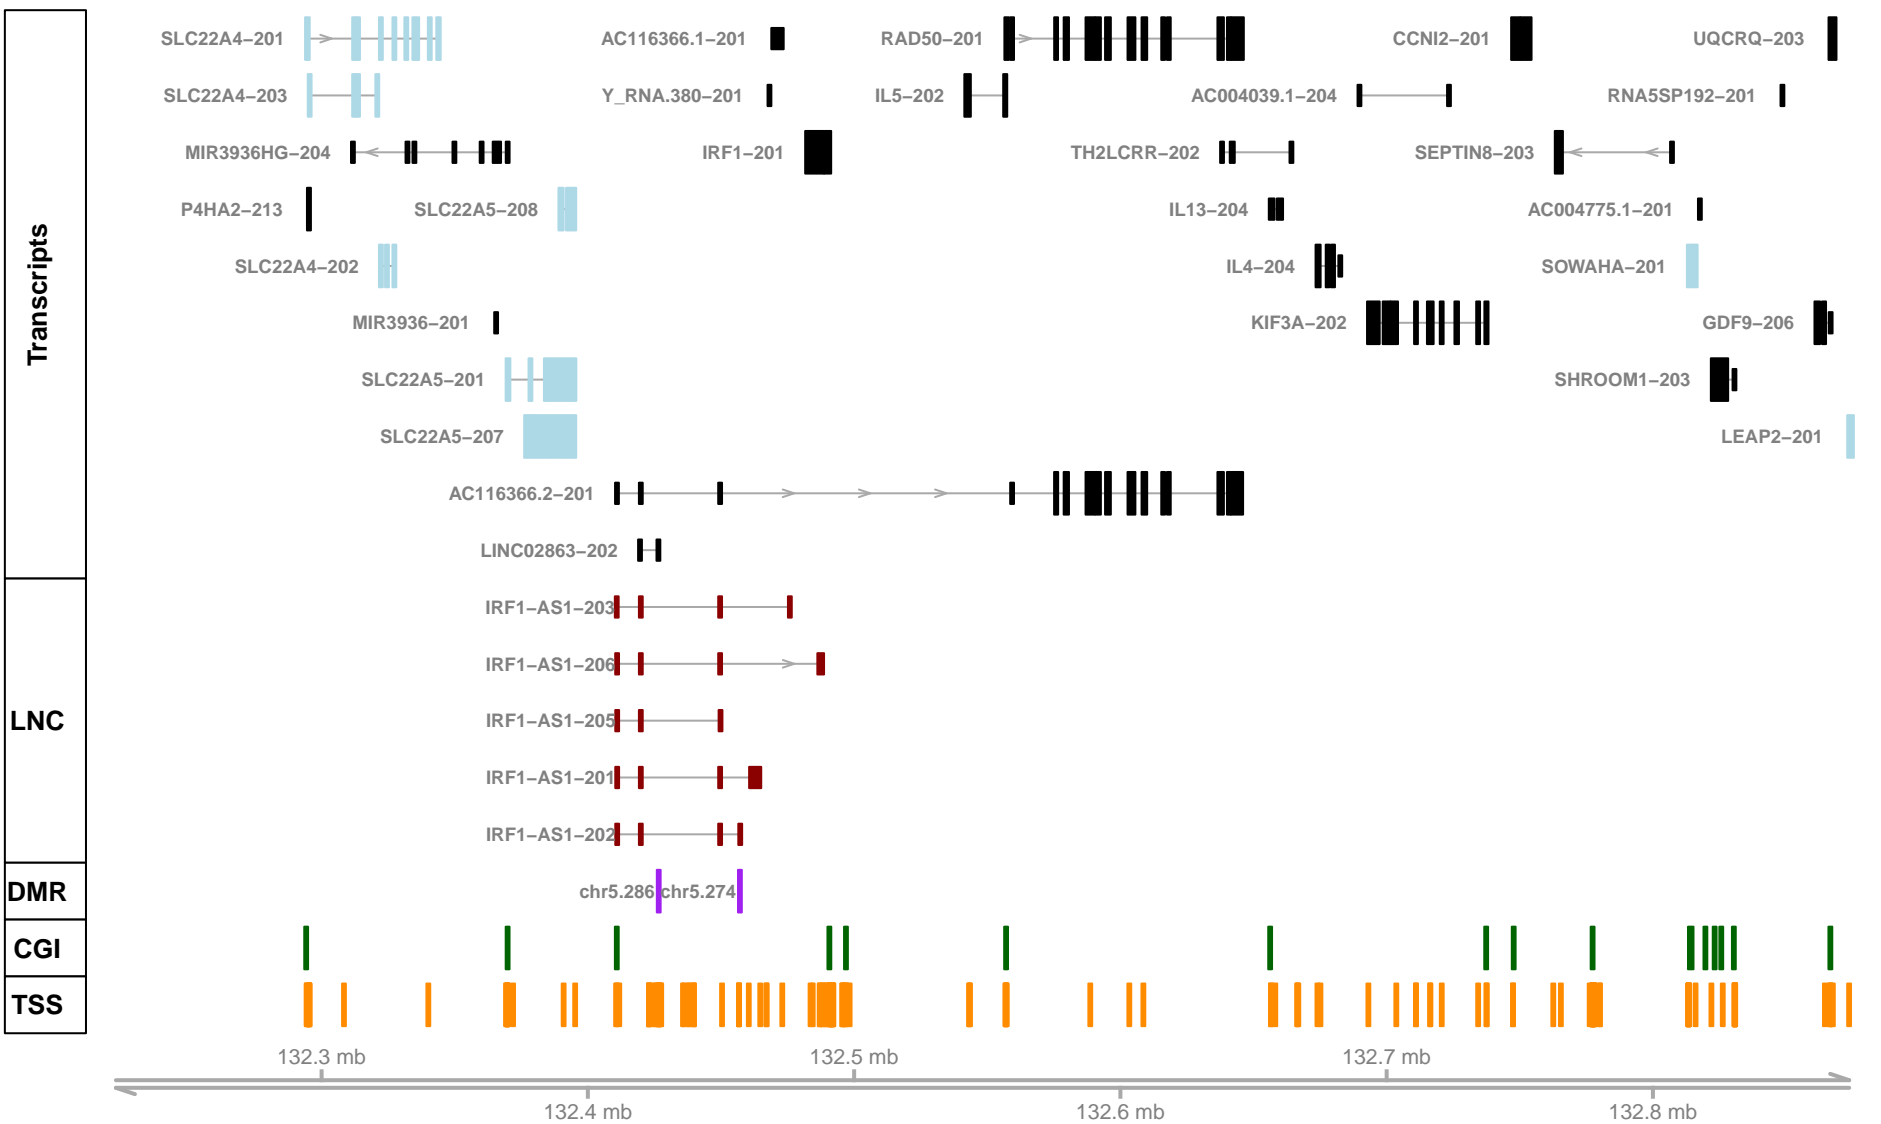

chr5.274

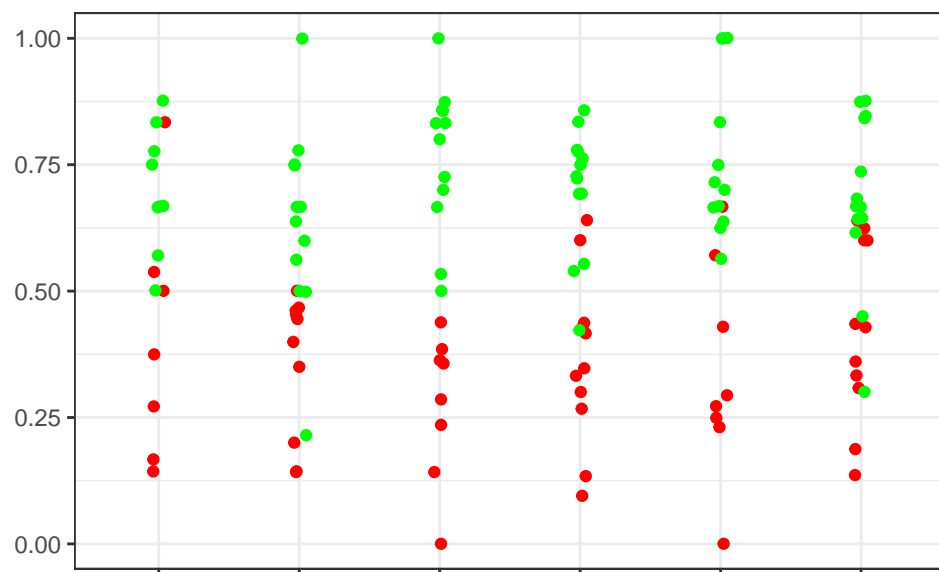

chr5.286

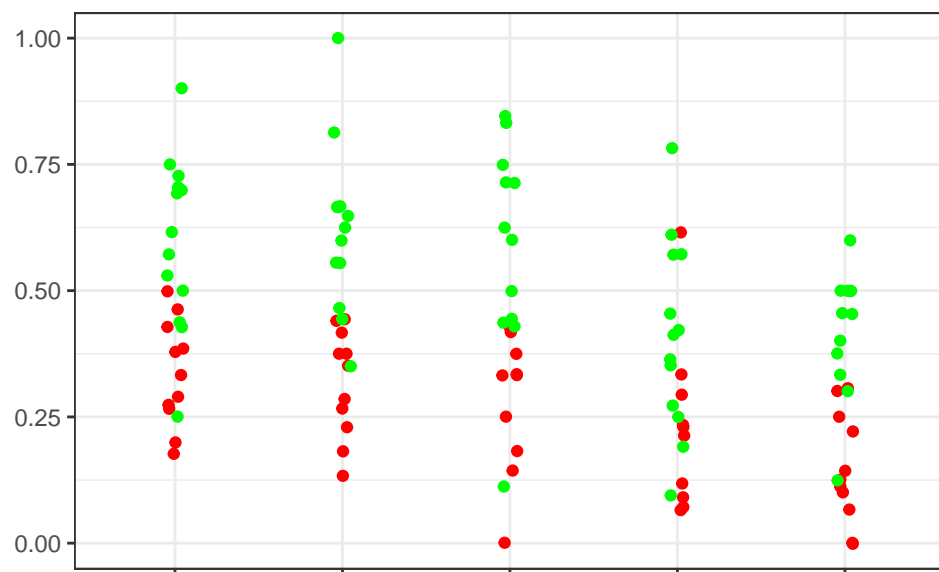

# ITPRIP-AS1

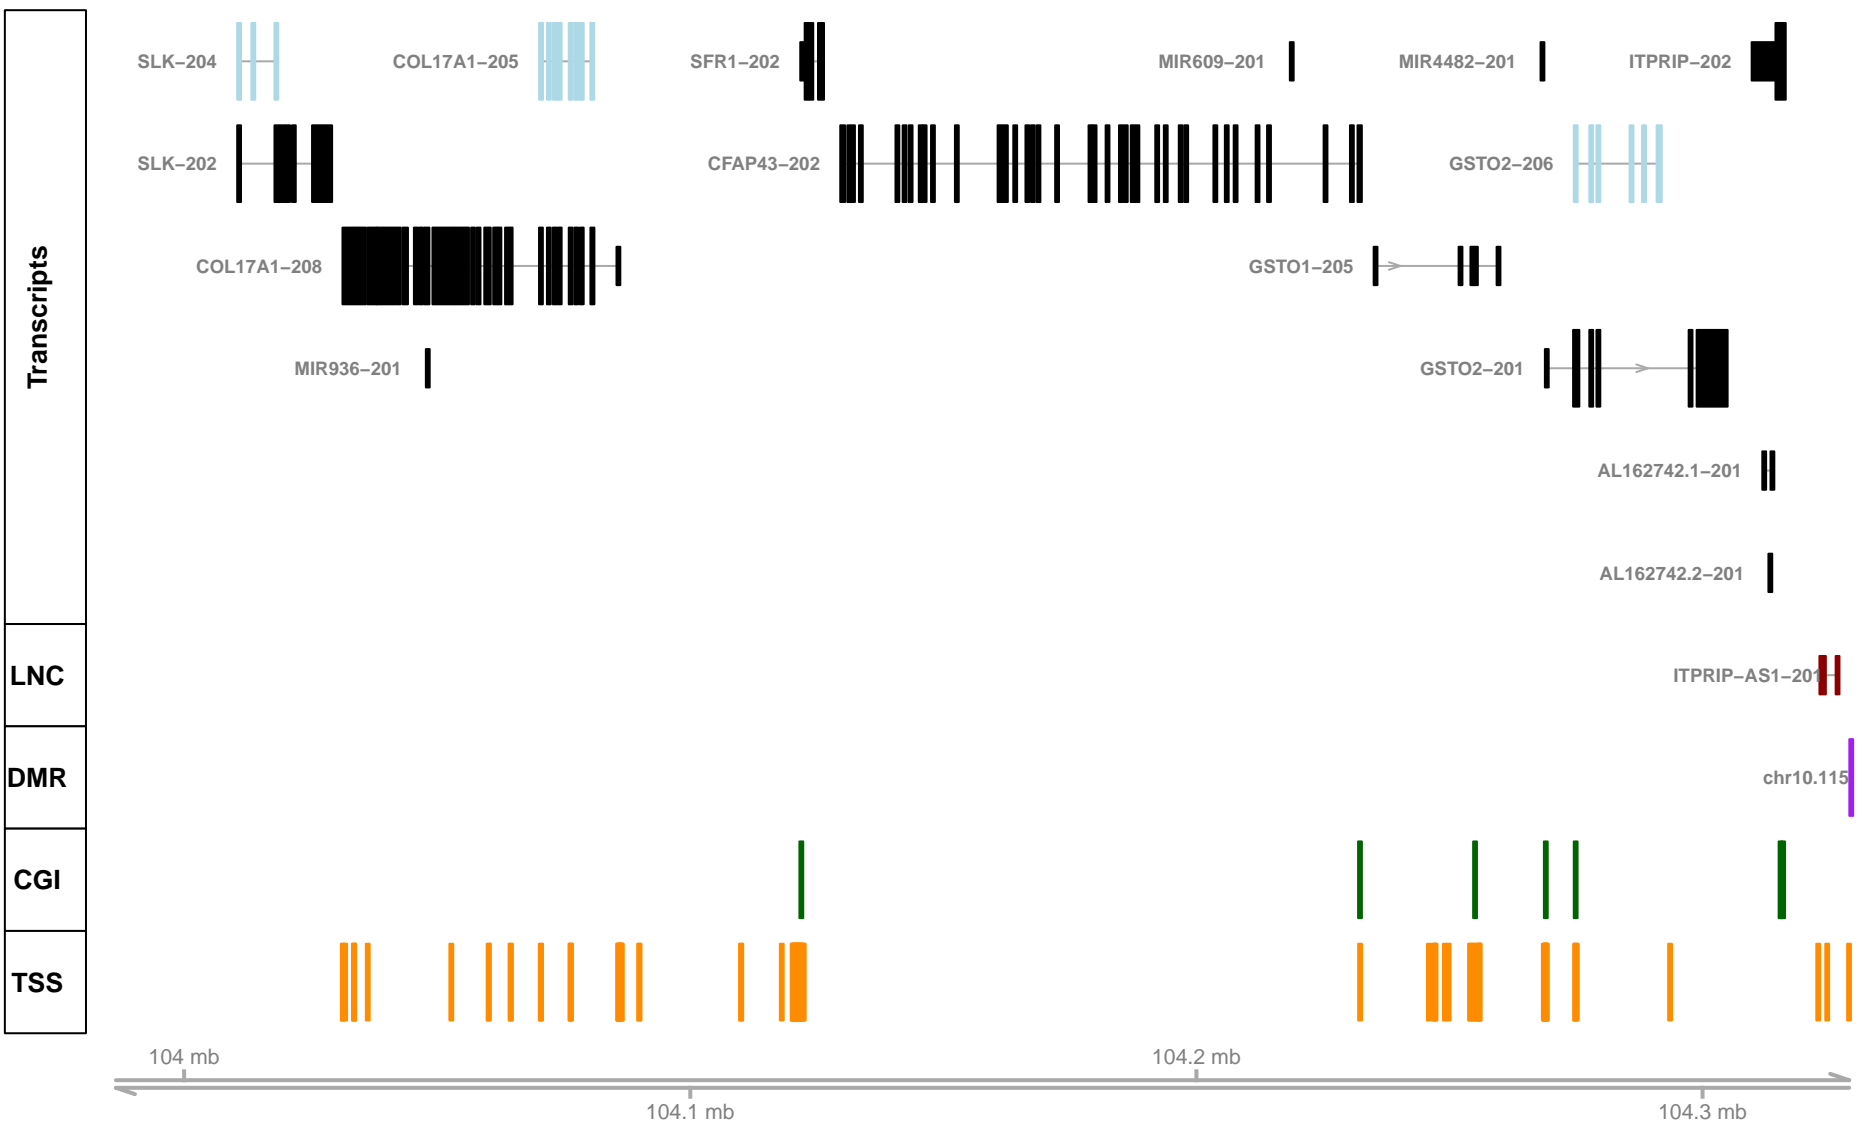

## chr10.115

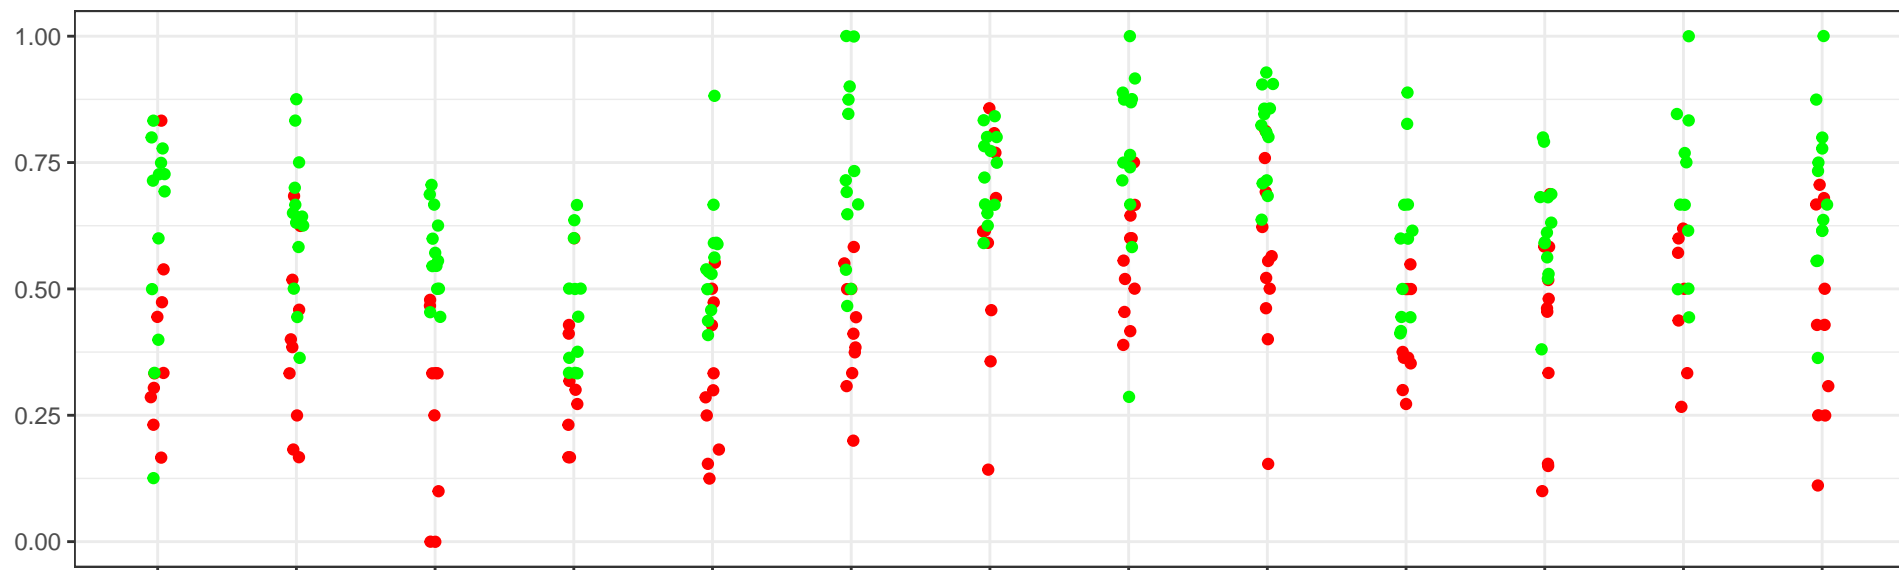

**KLRK1-AS1**

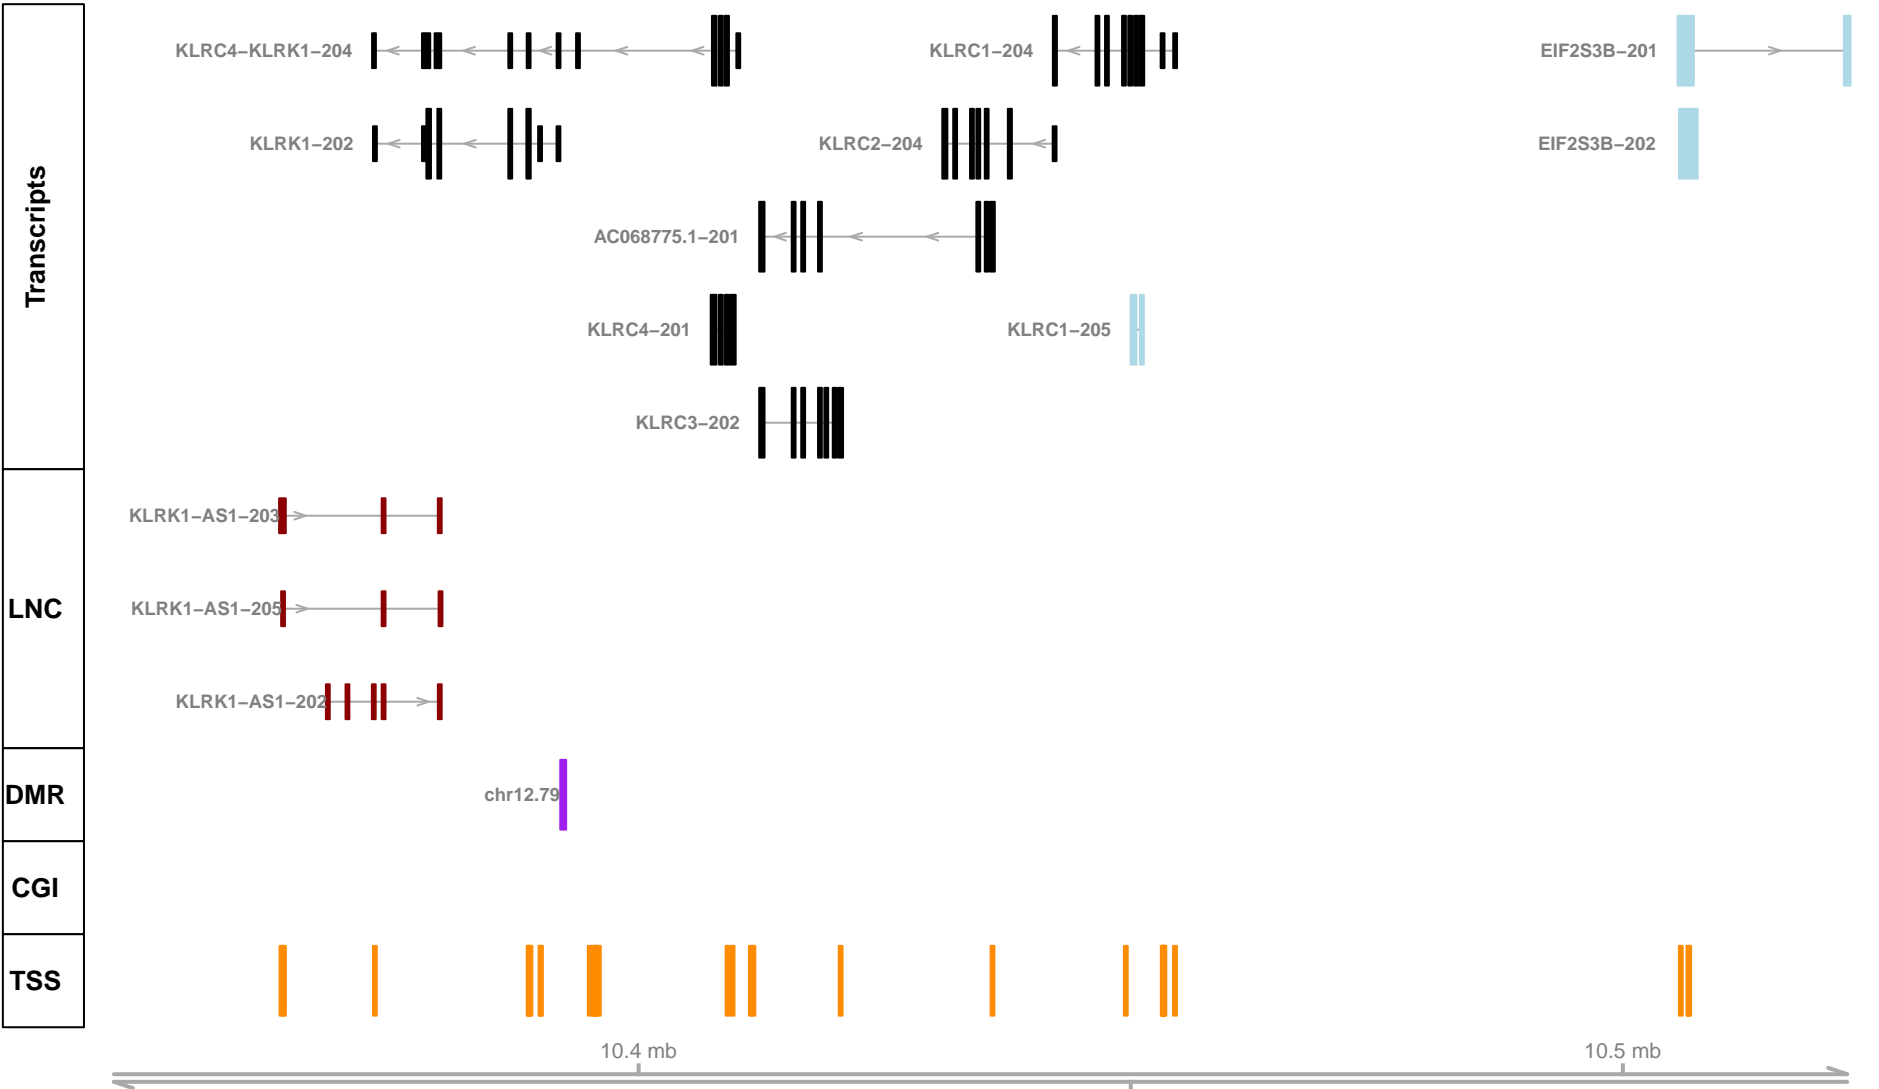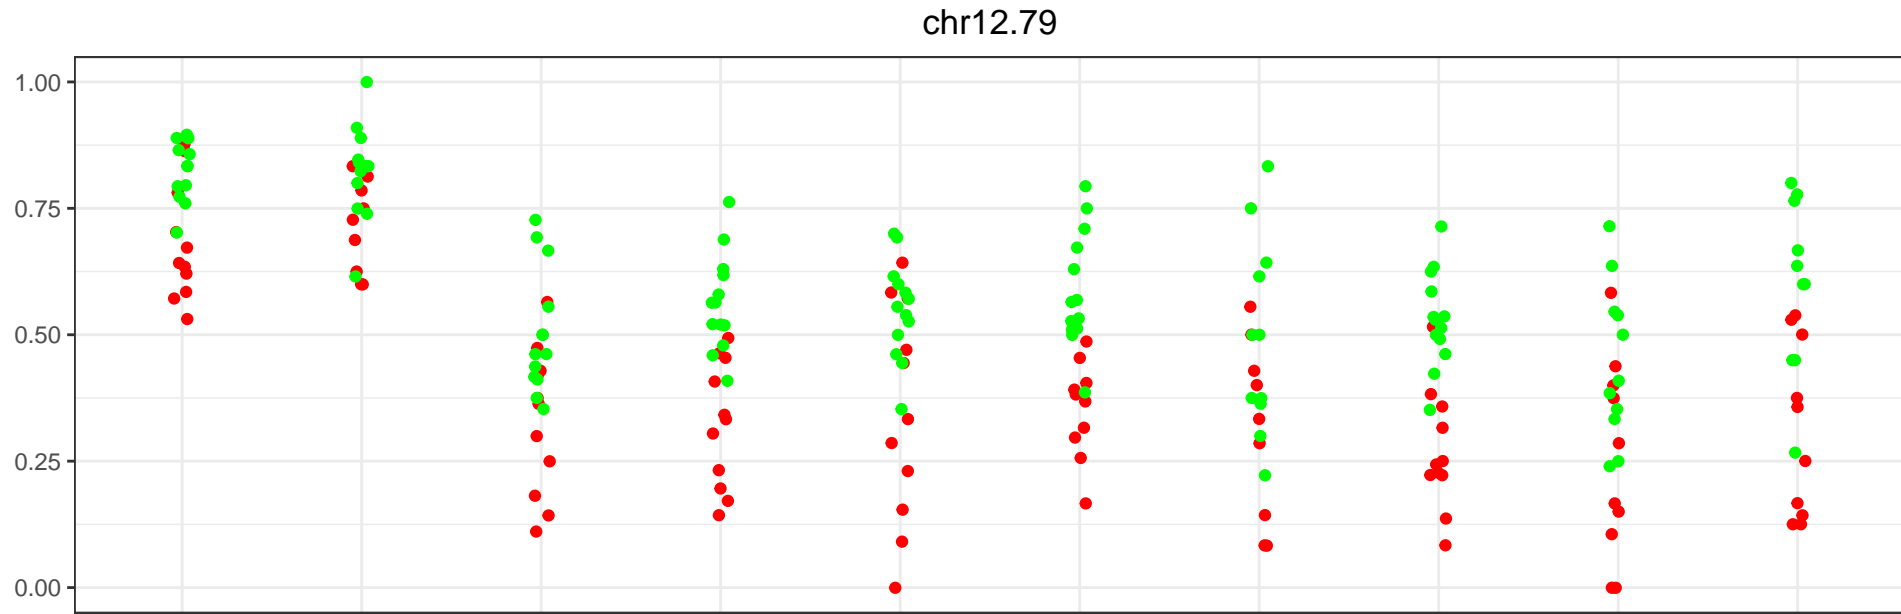

# LGR4-AS1

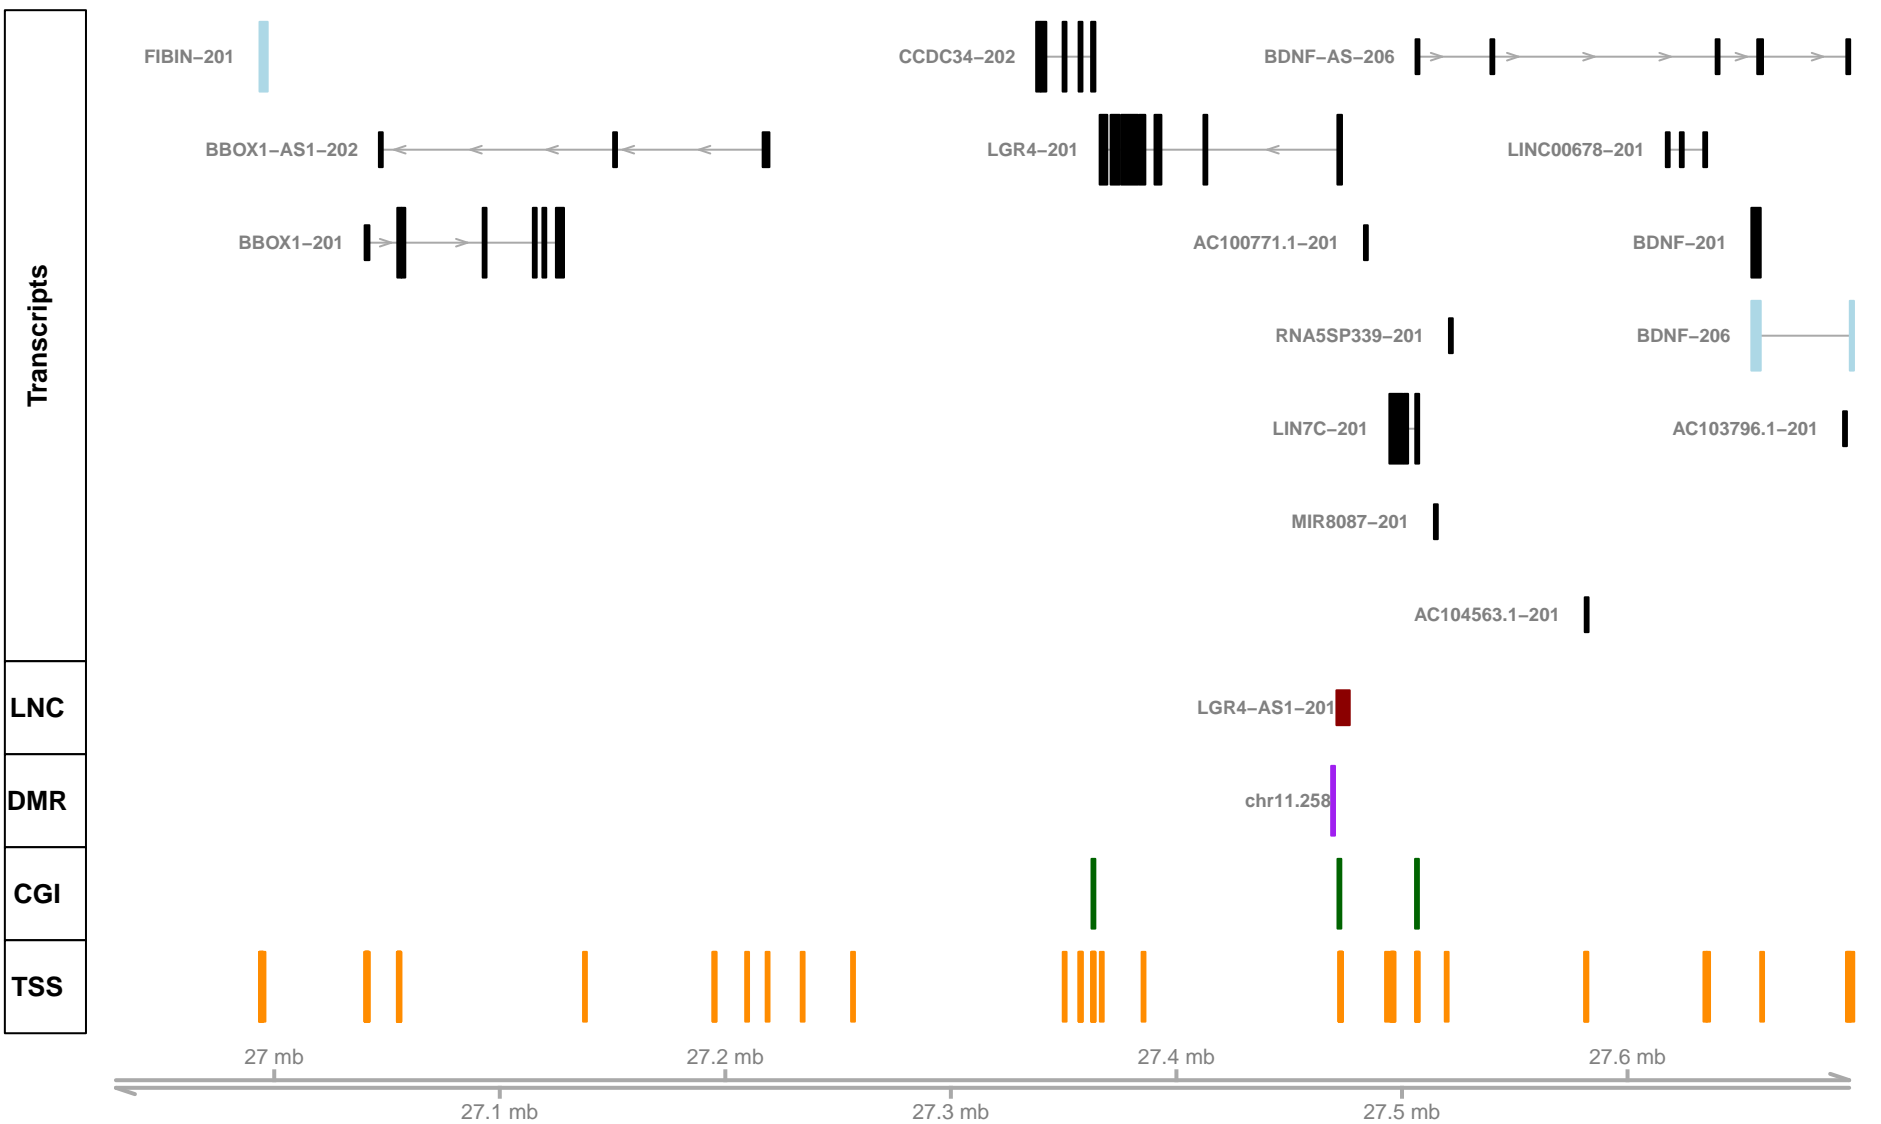

## chr11.258

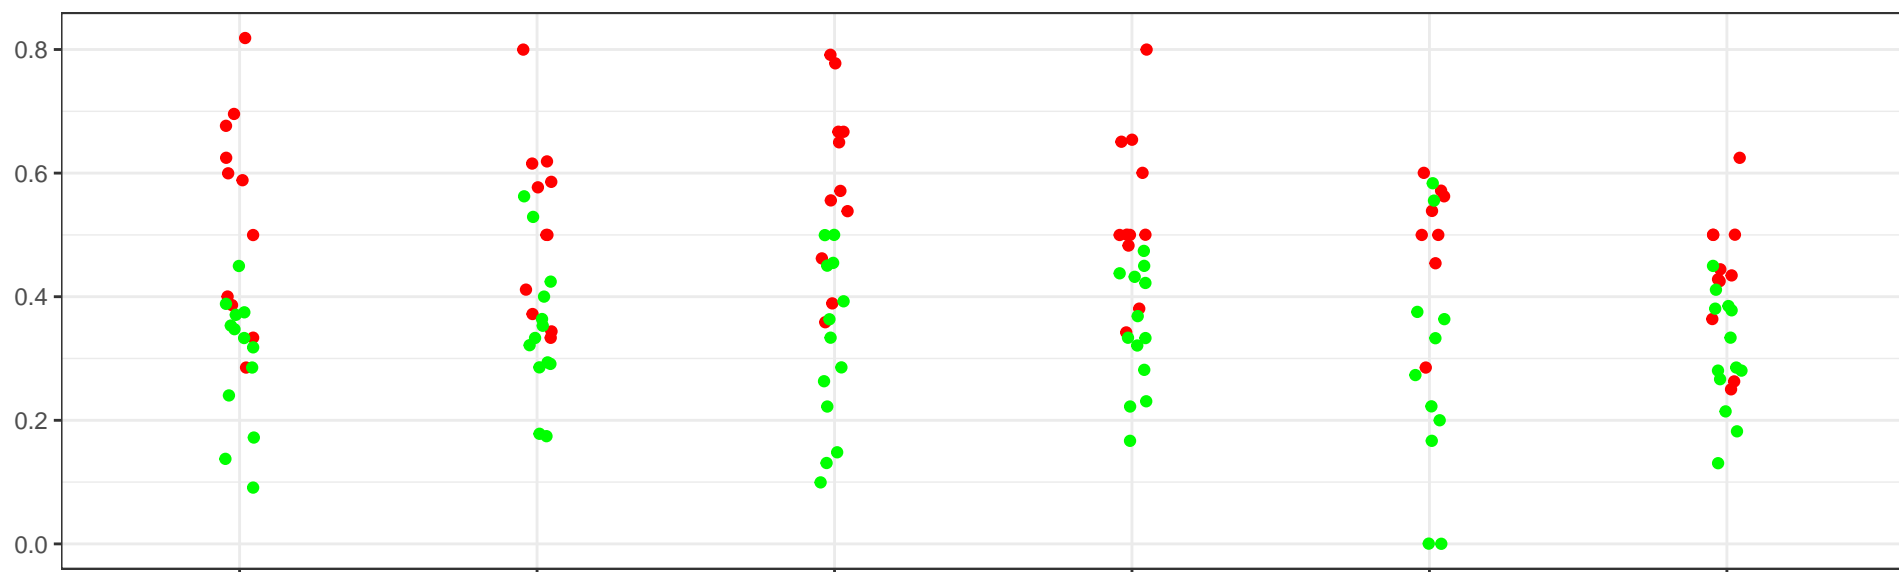

# LINC00582

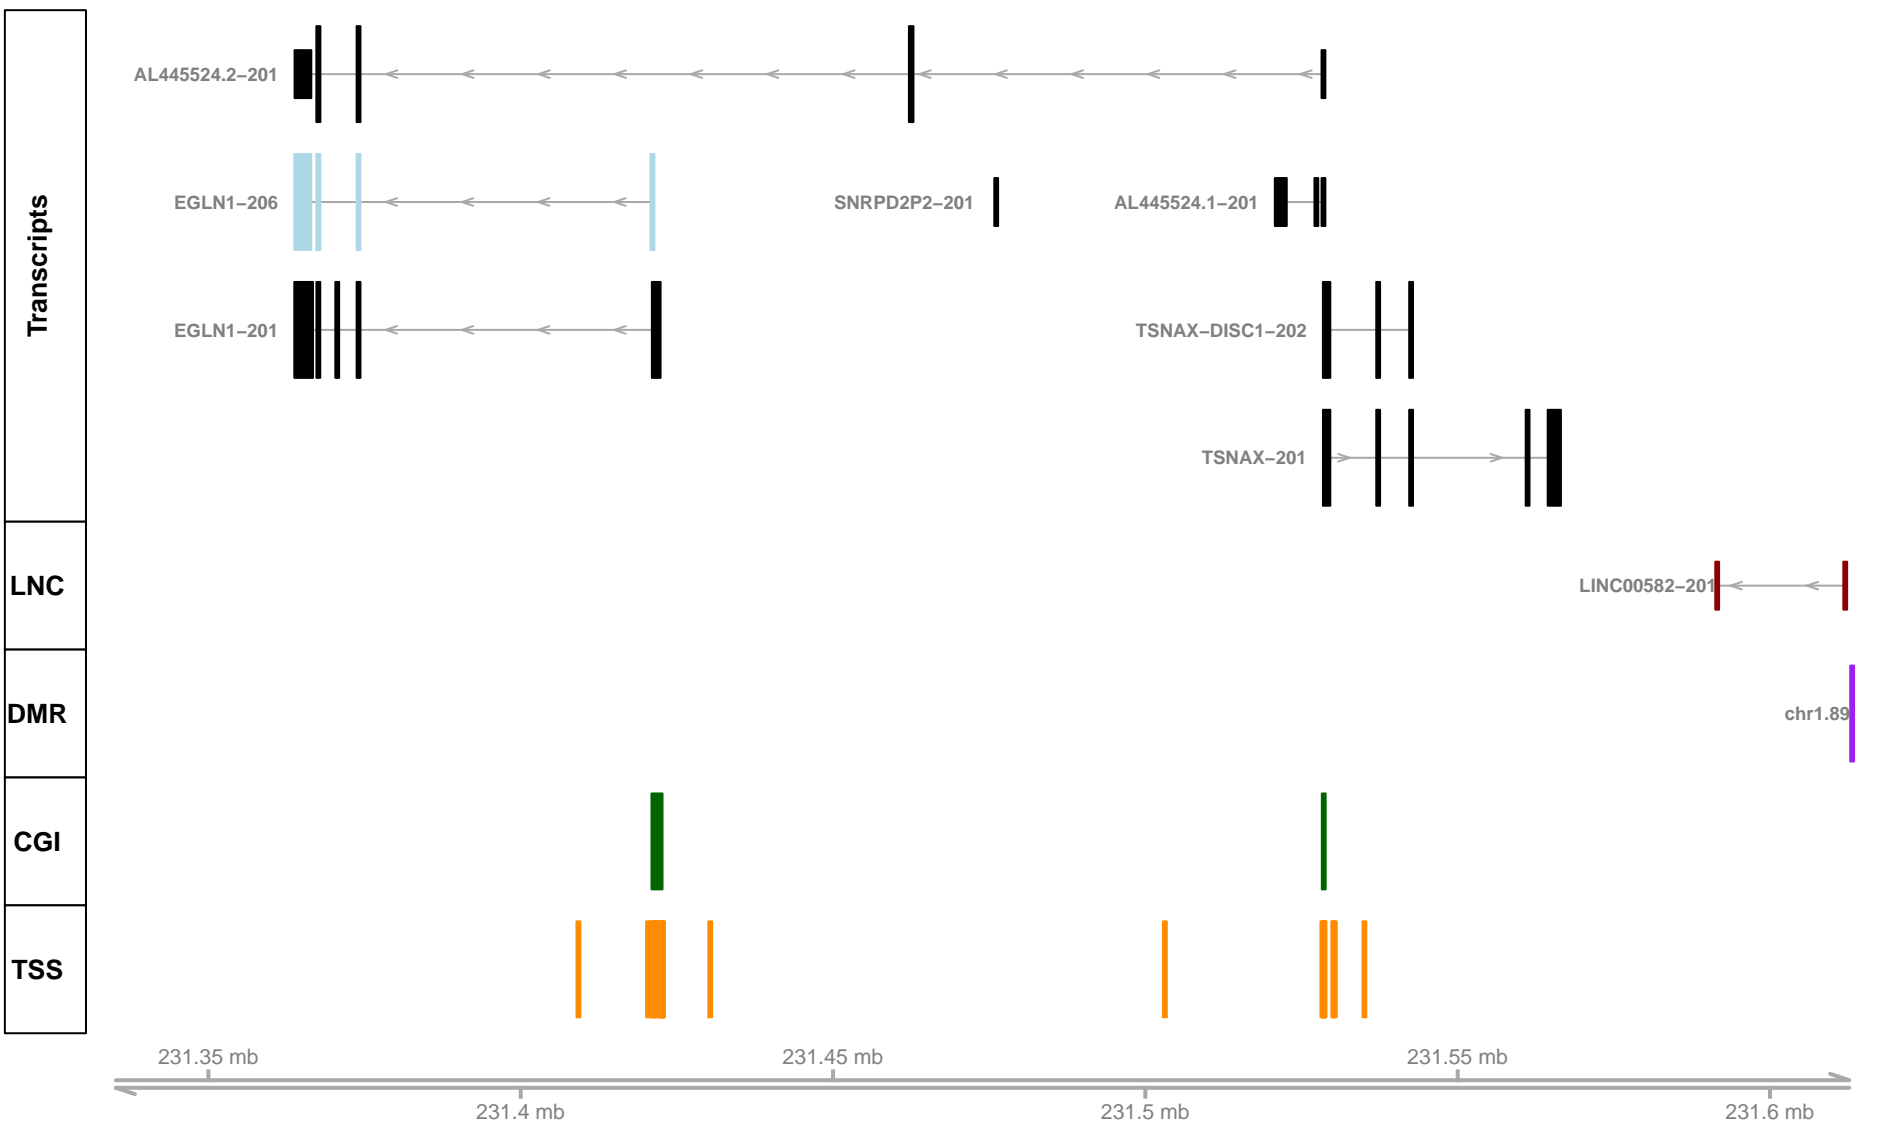

## chr1.89

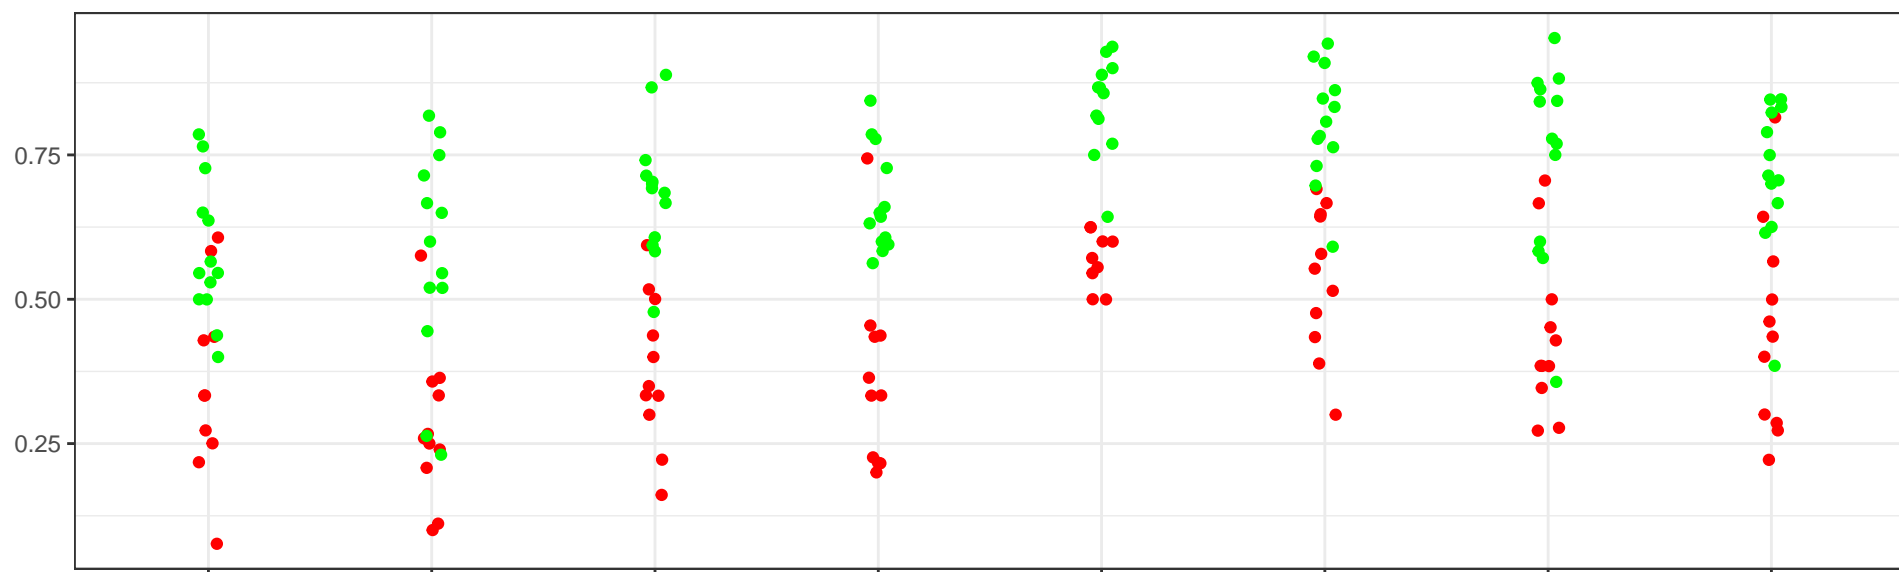

# LINC00899

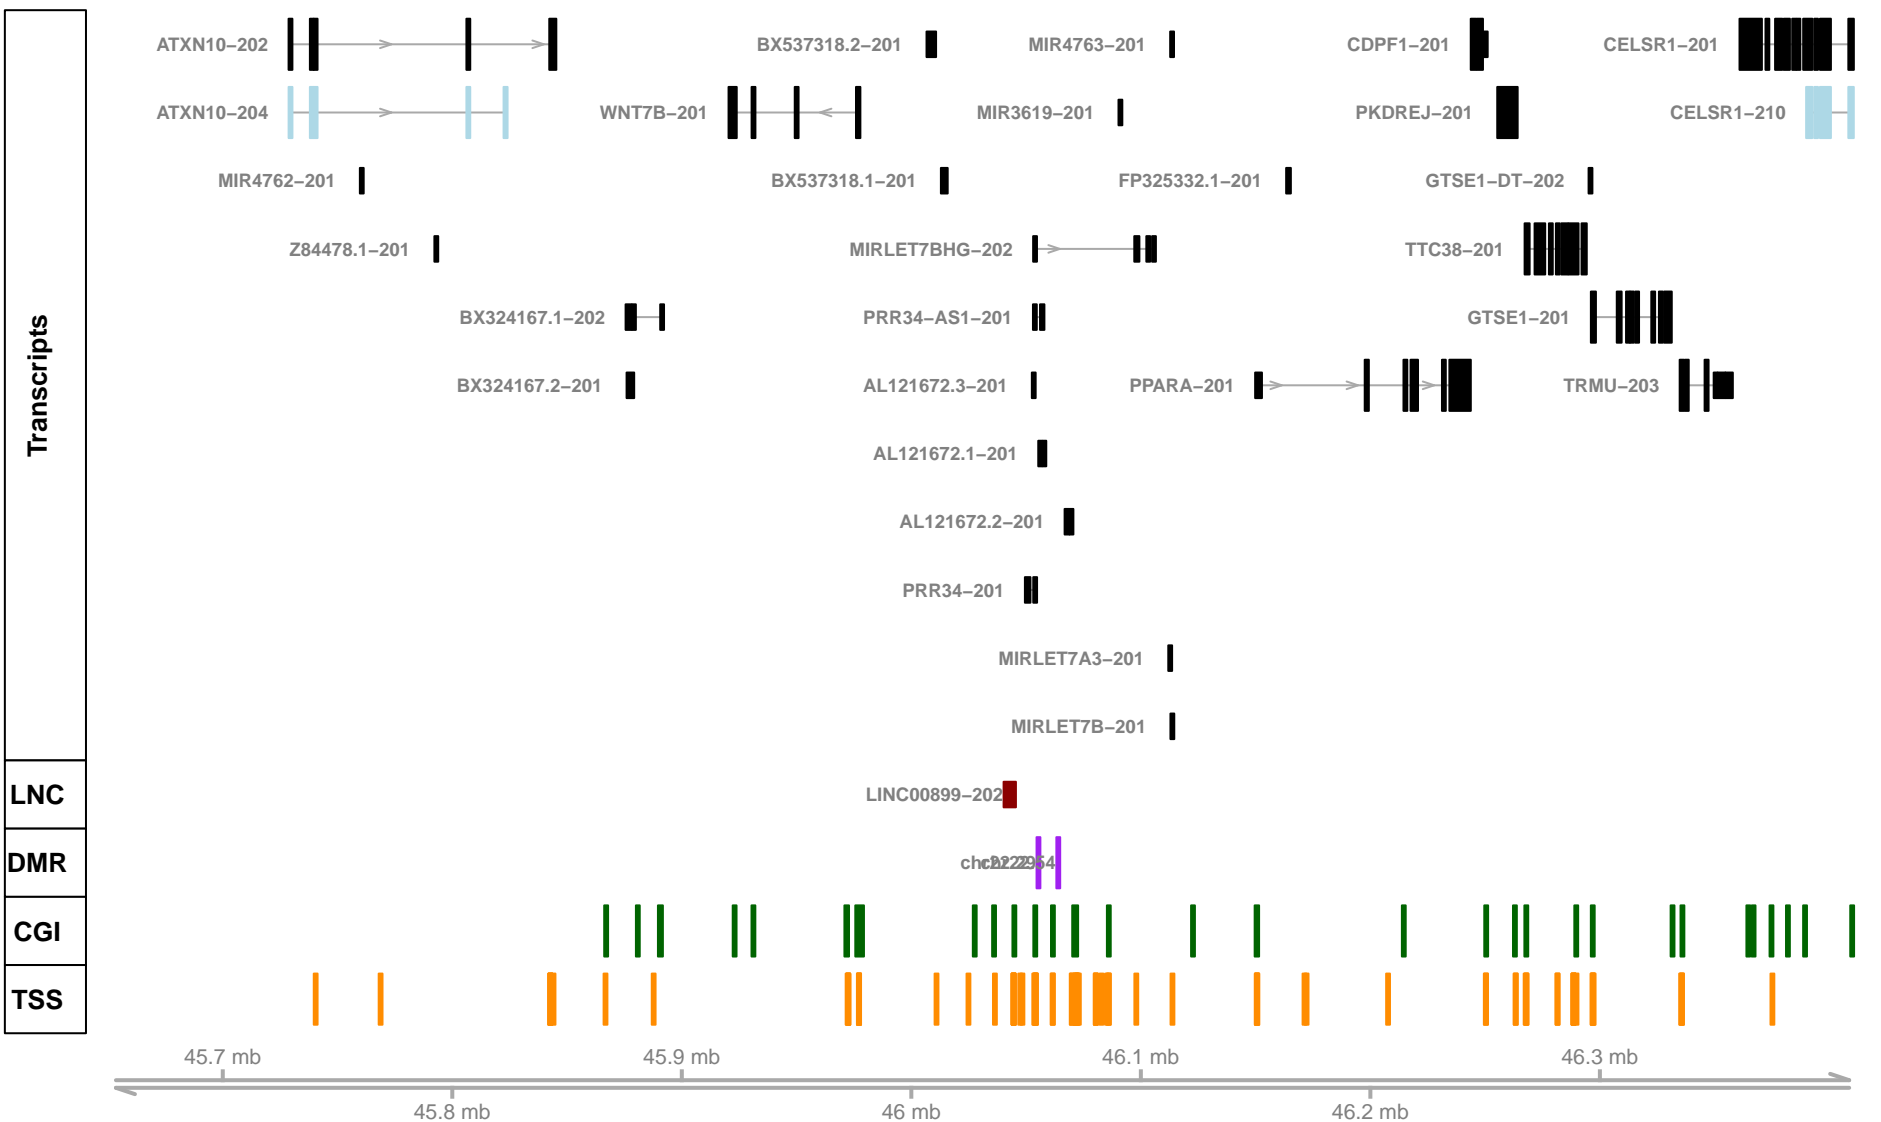

chr22.29

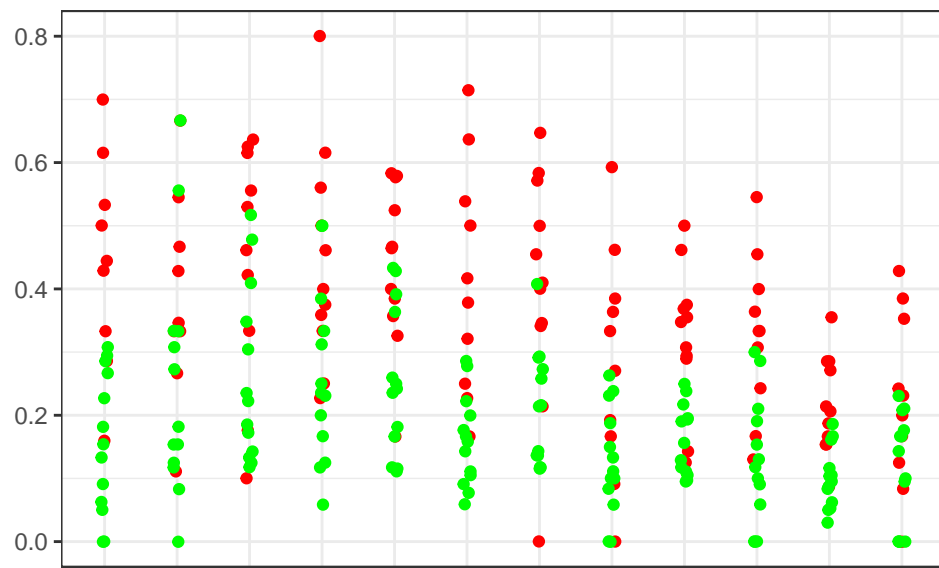

chr22.54

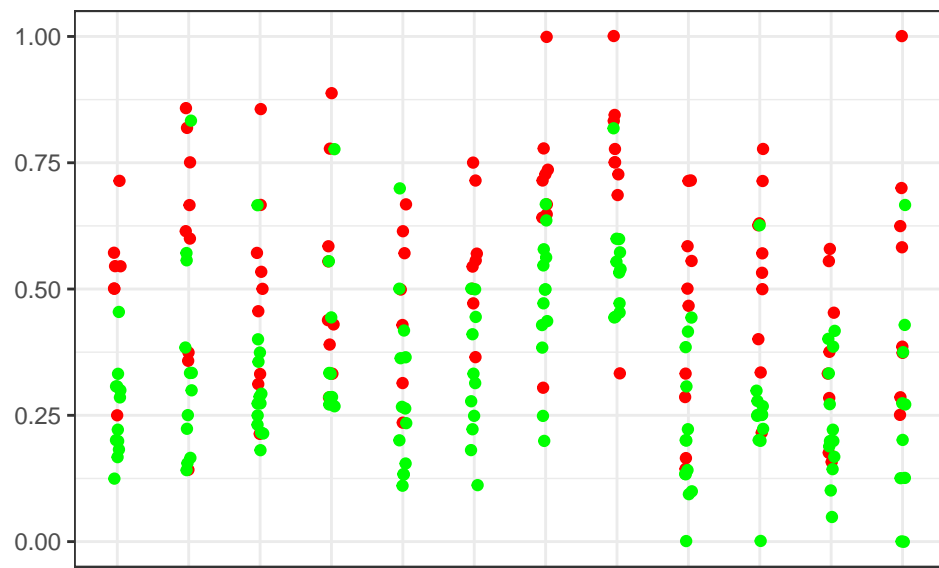

# LINC00940

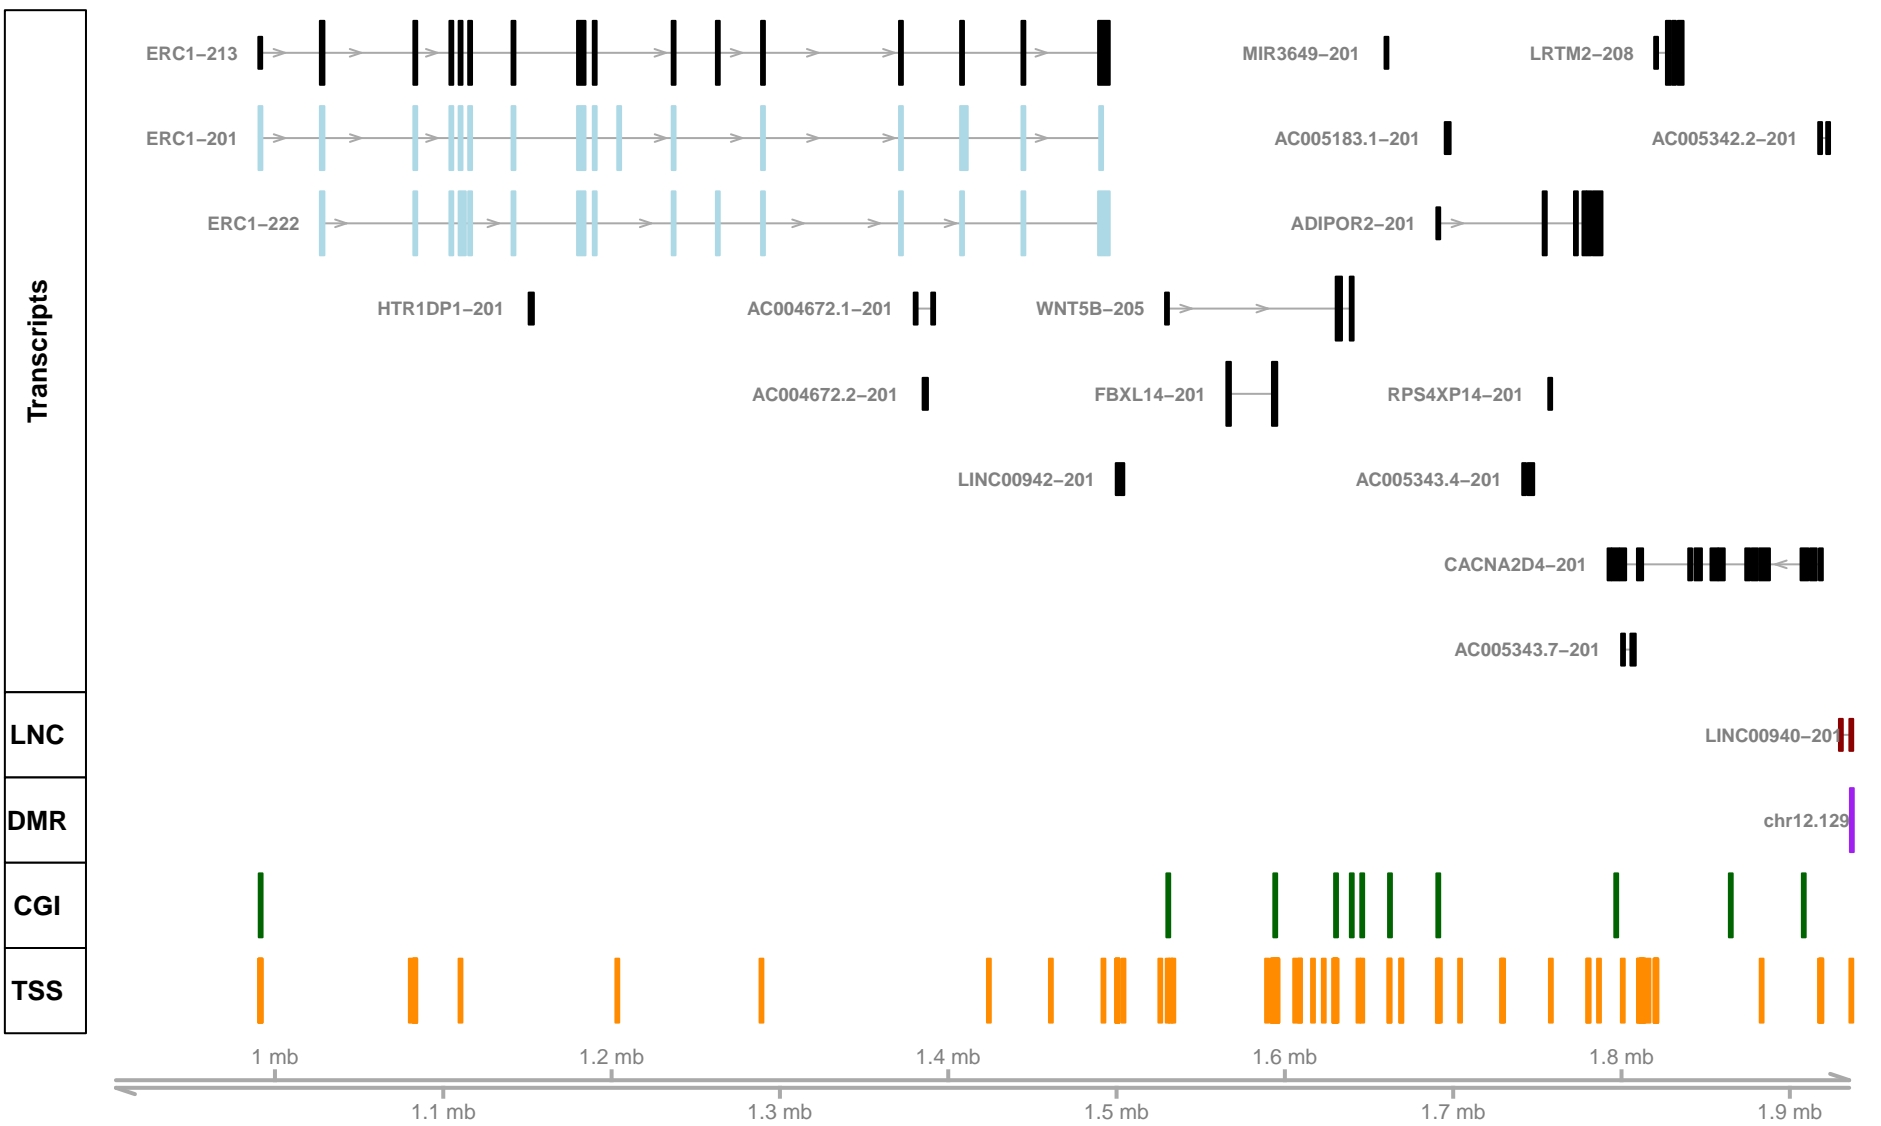

## chr12.129

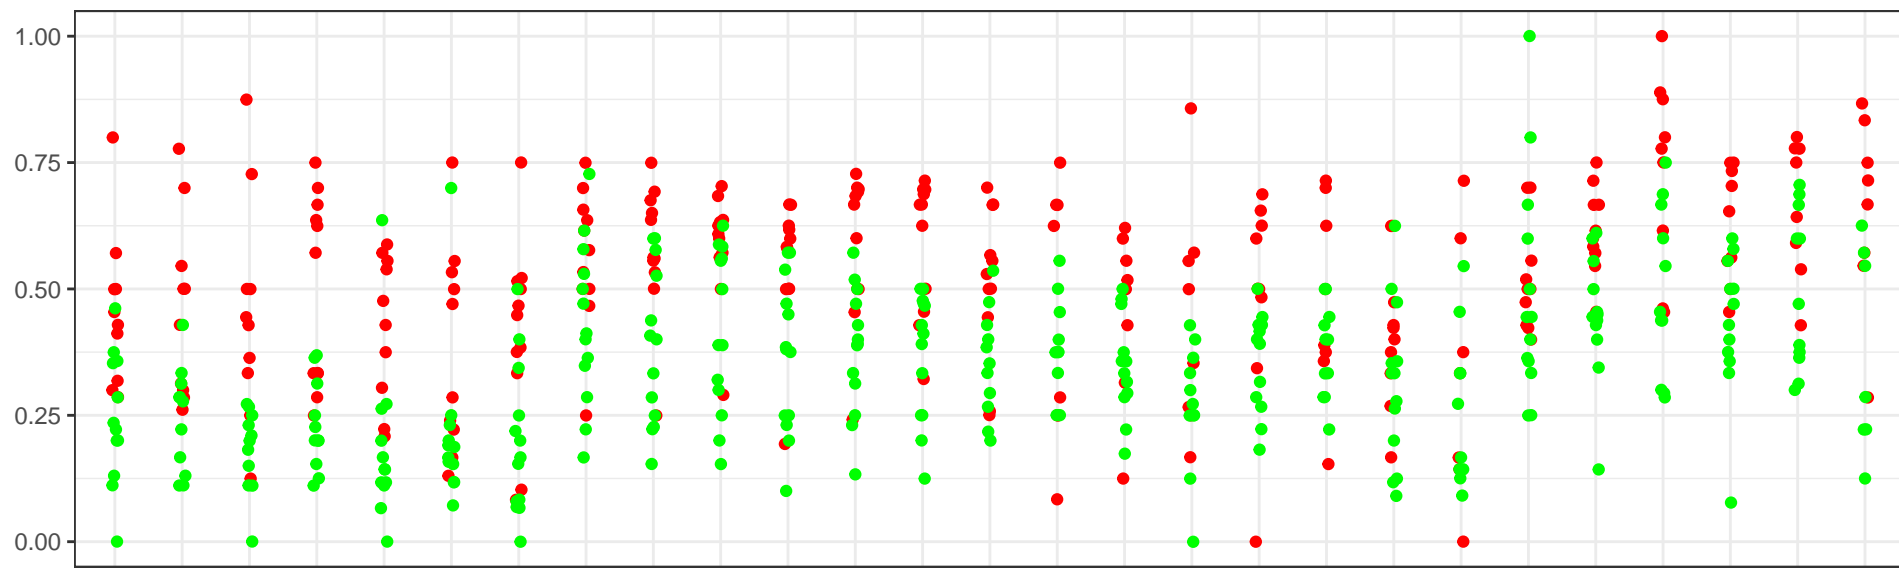

# LINC01146

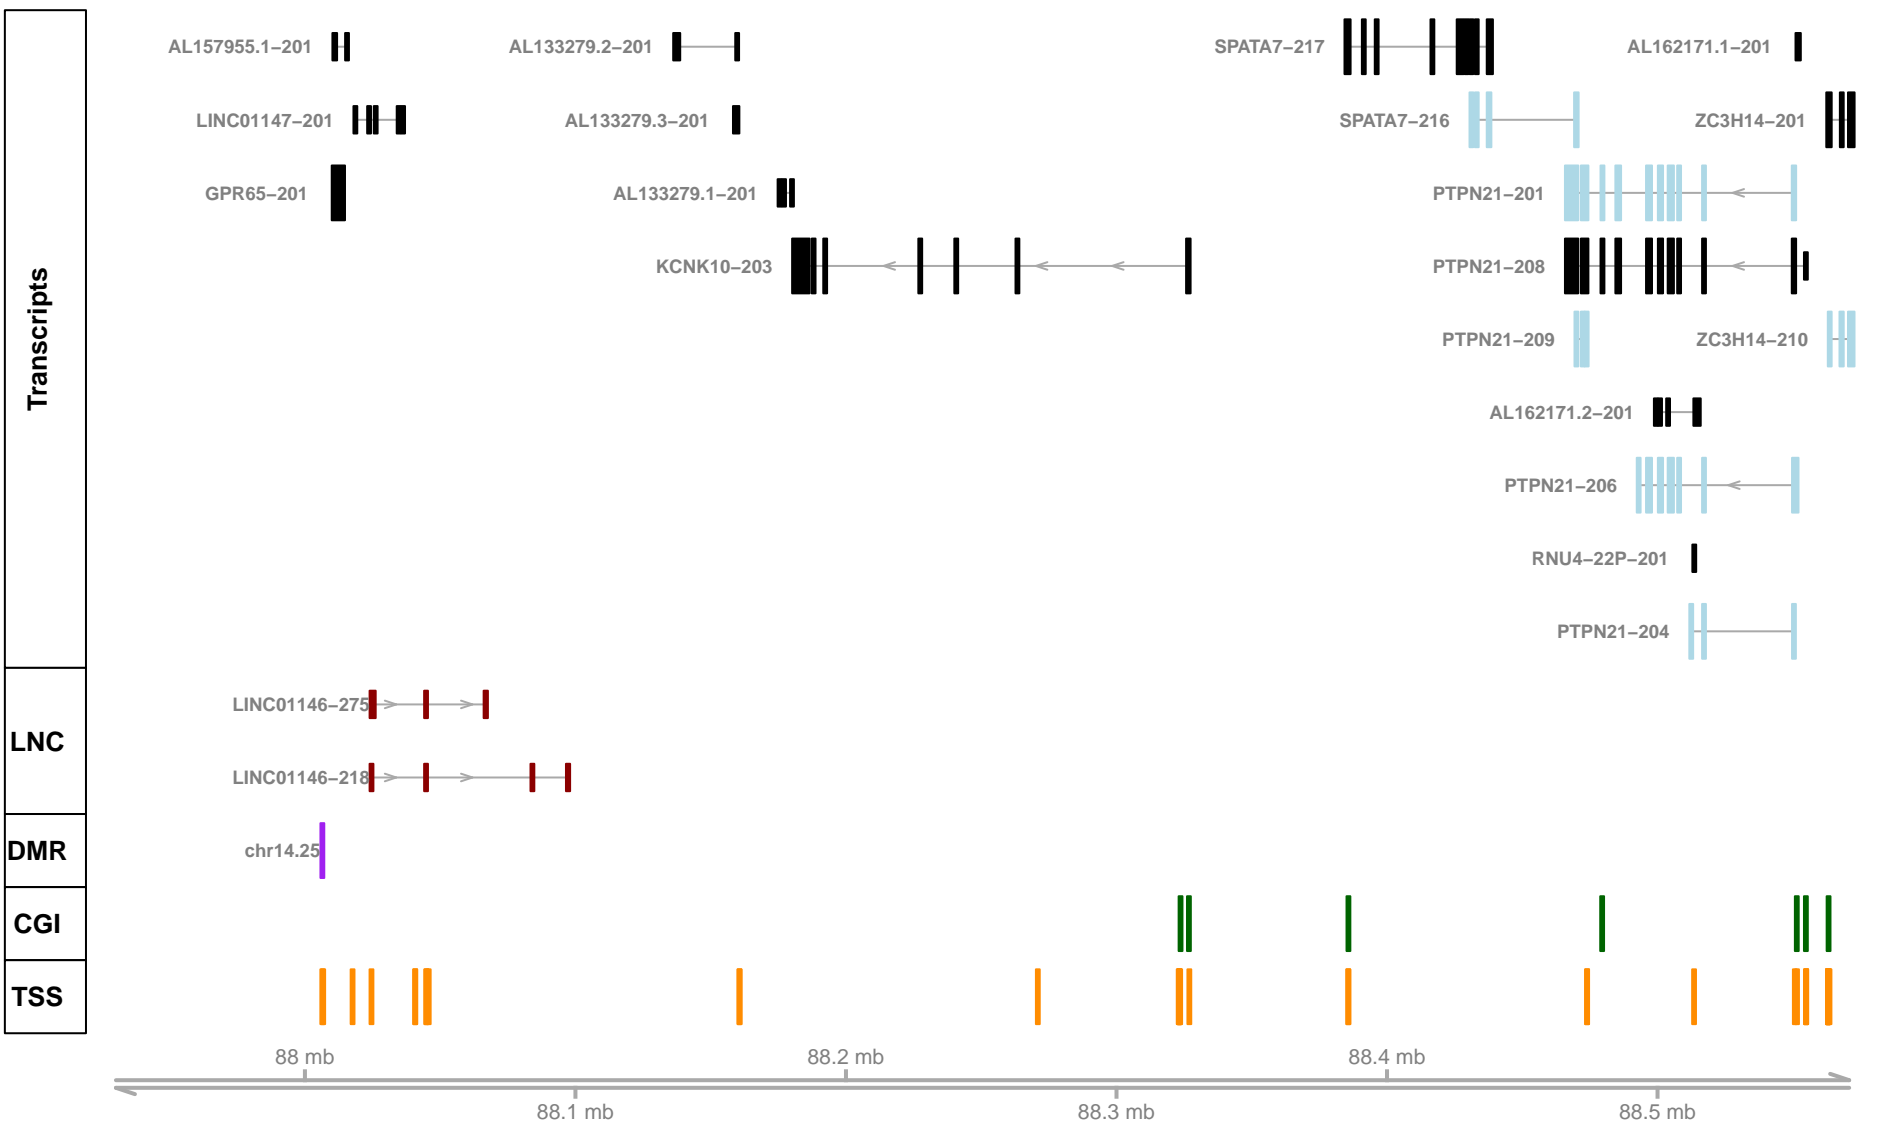

## chr14.25

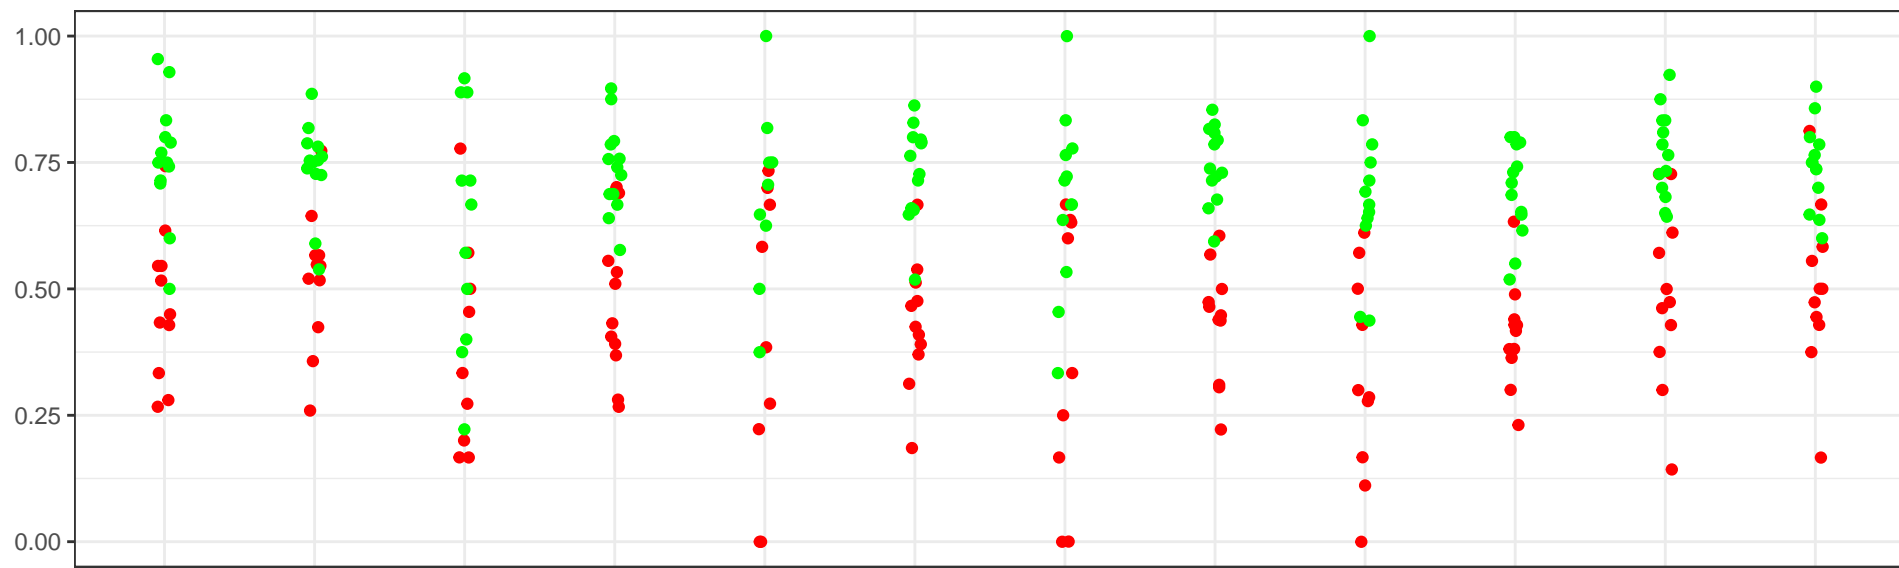

# LINC01147

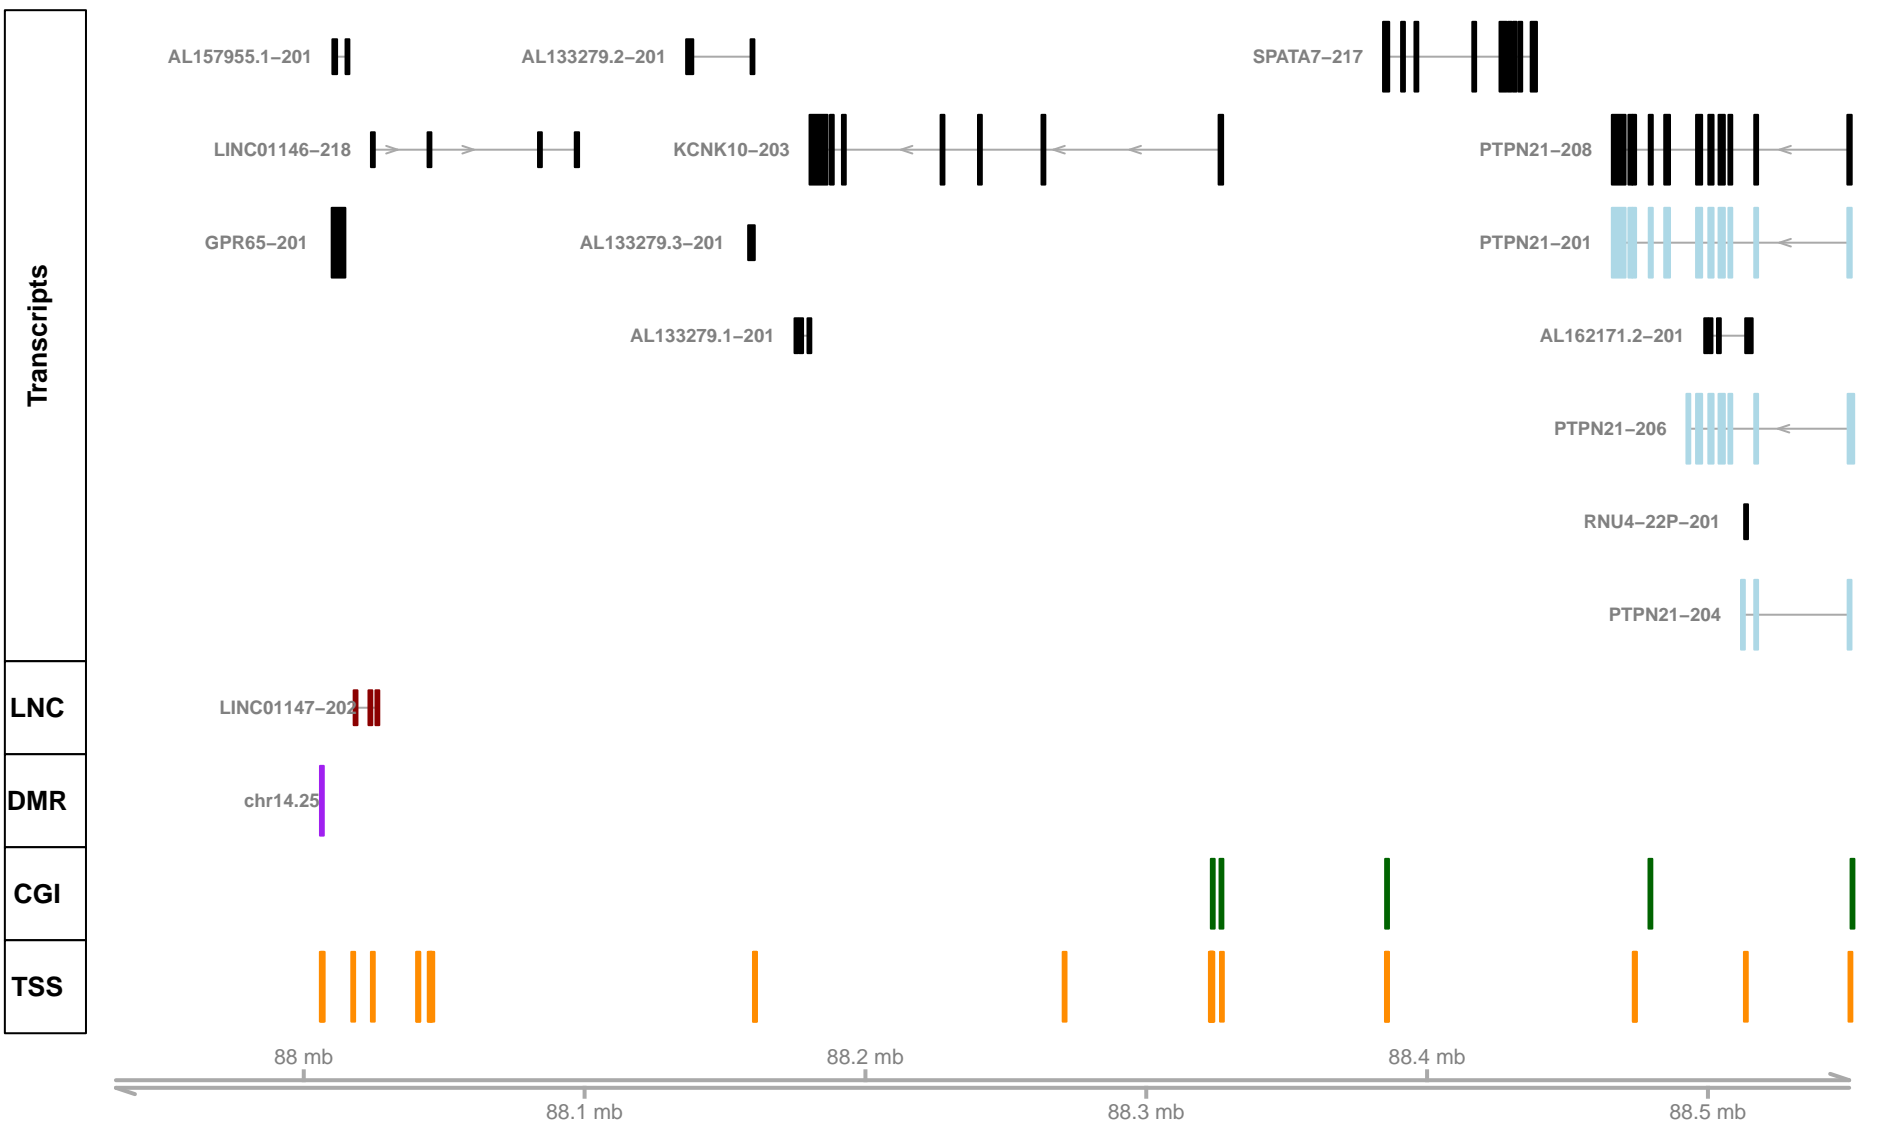

## chr14.25

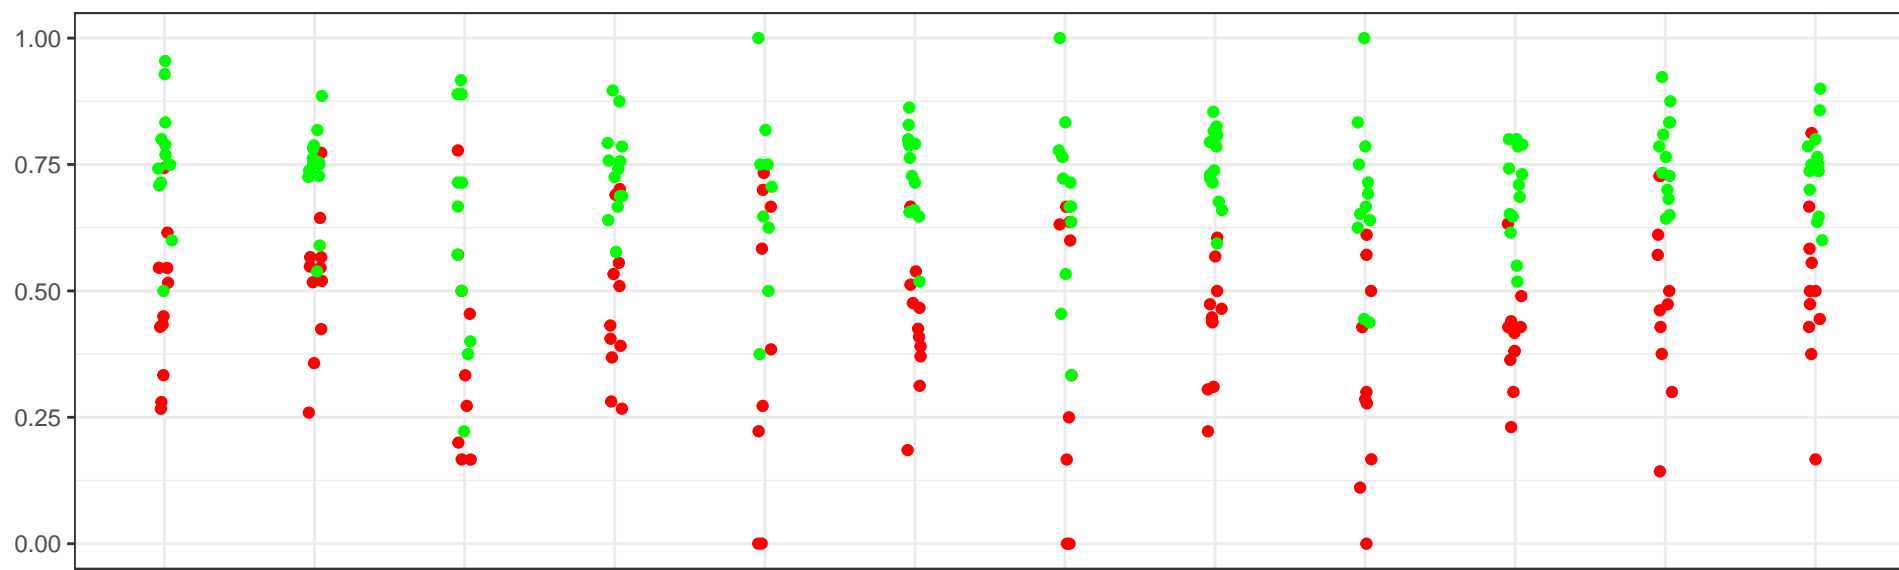

# LINC01344

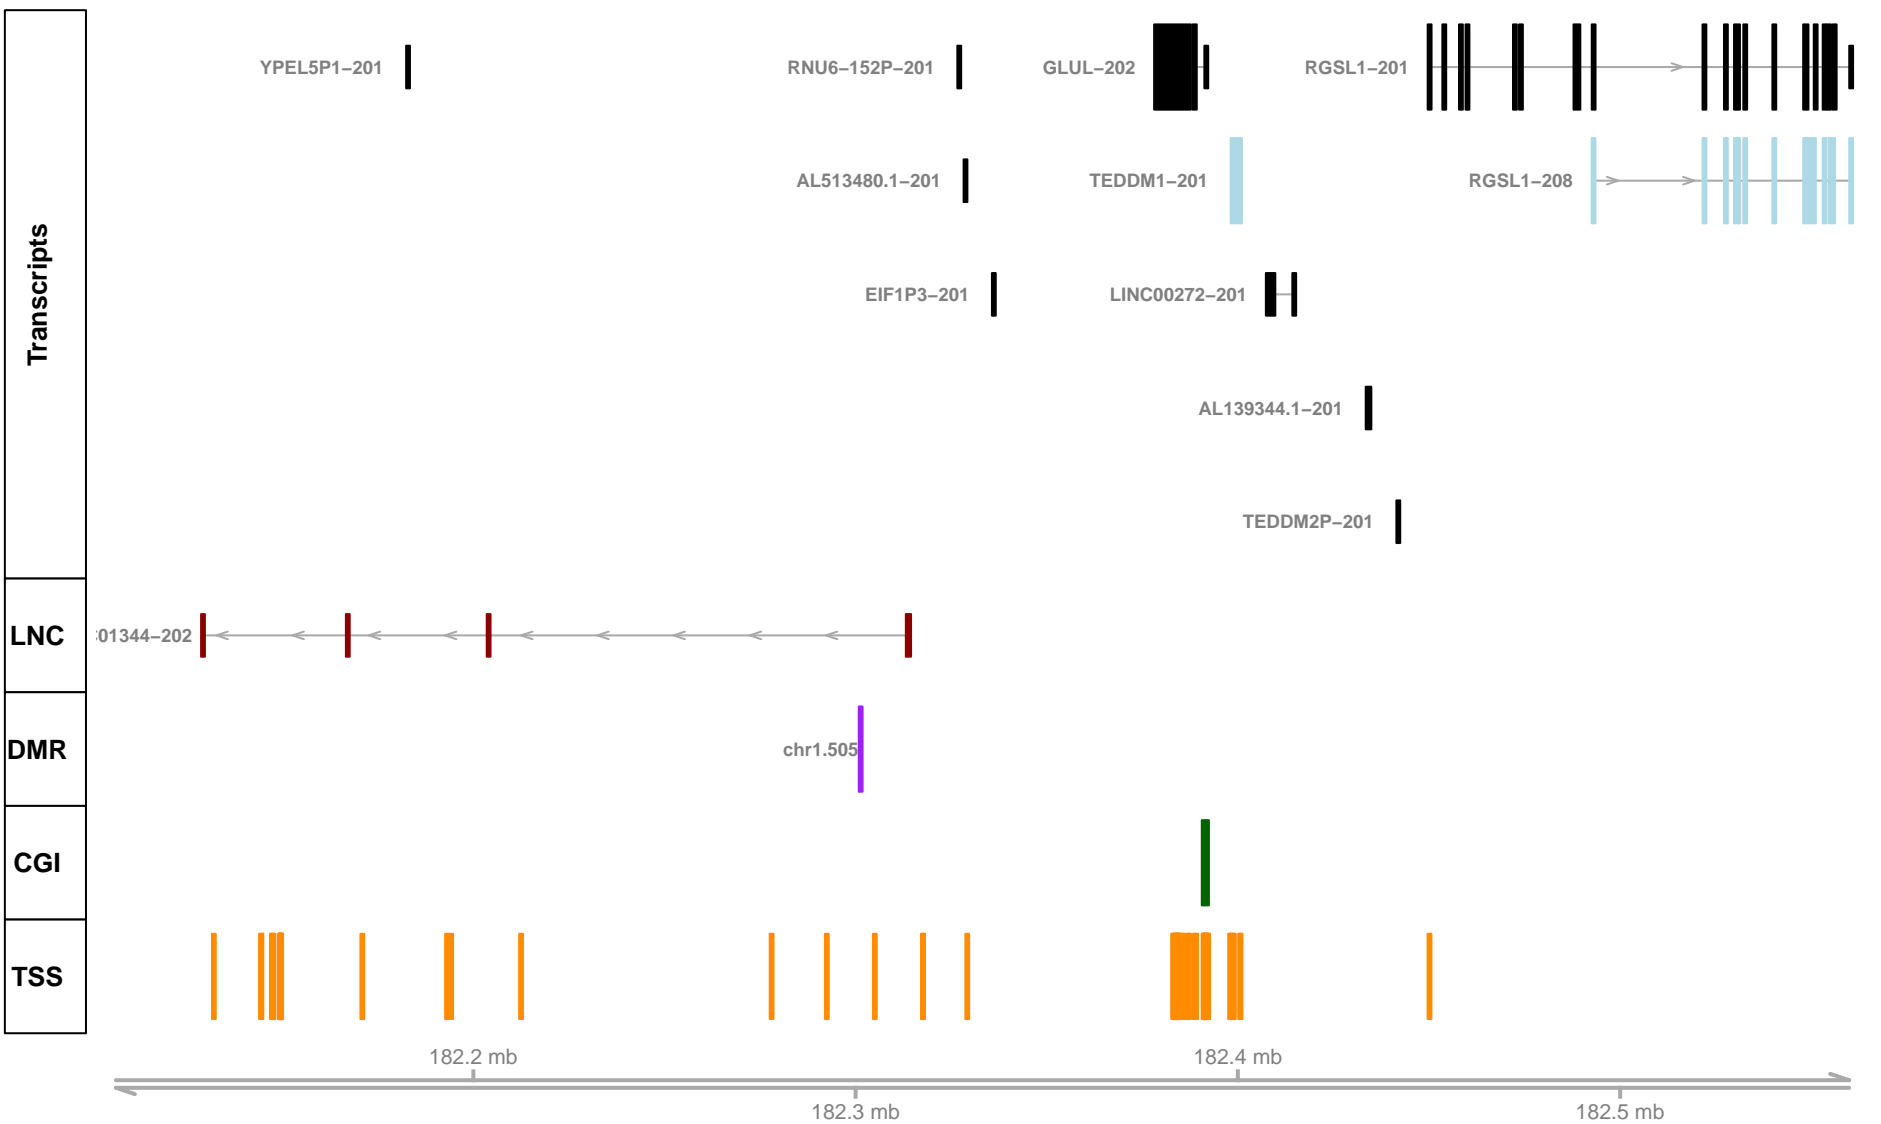

## chr1.505

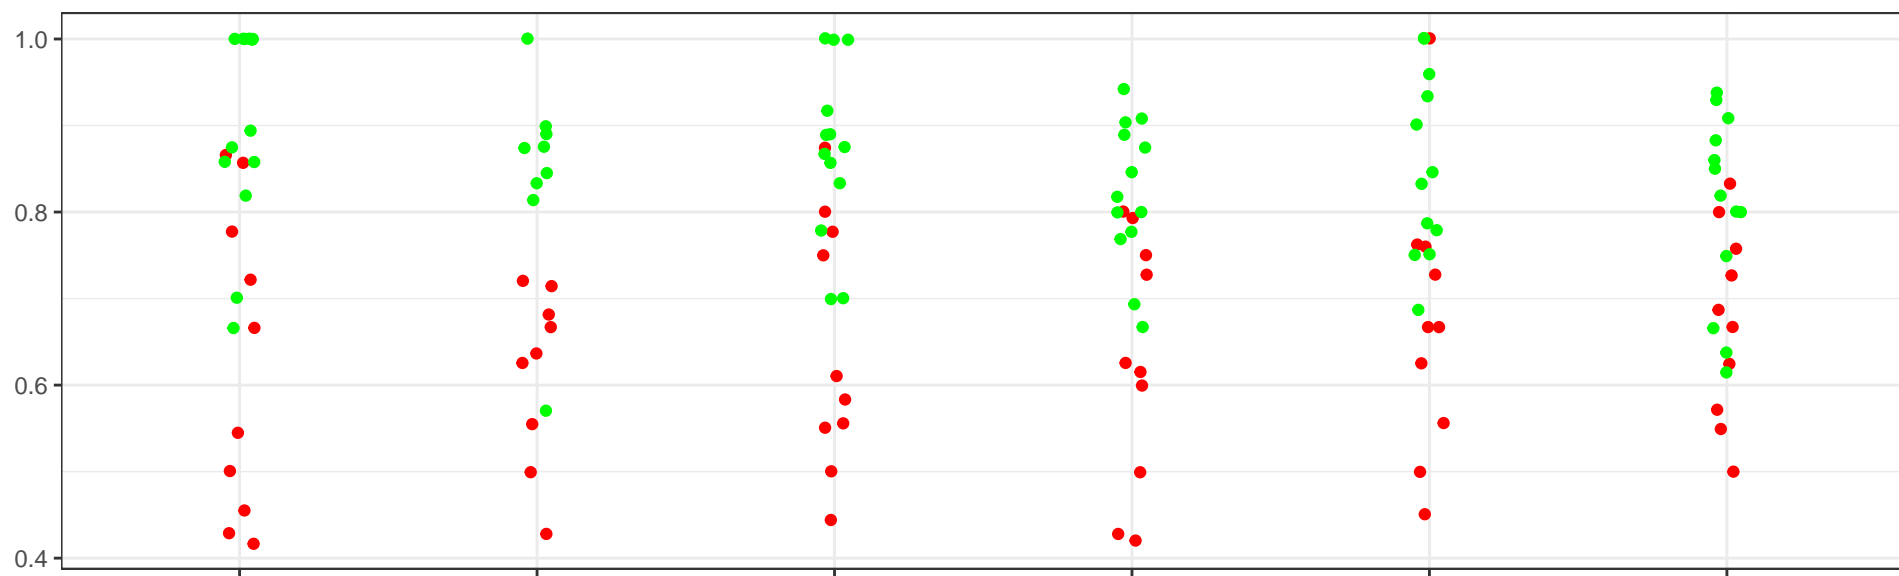

## chr1.593

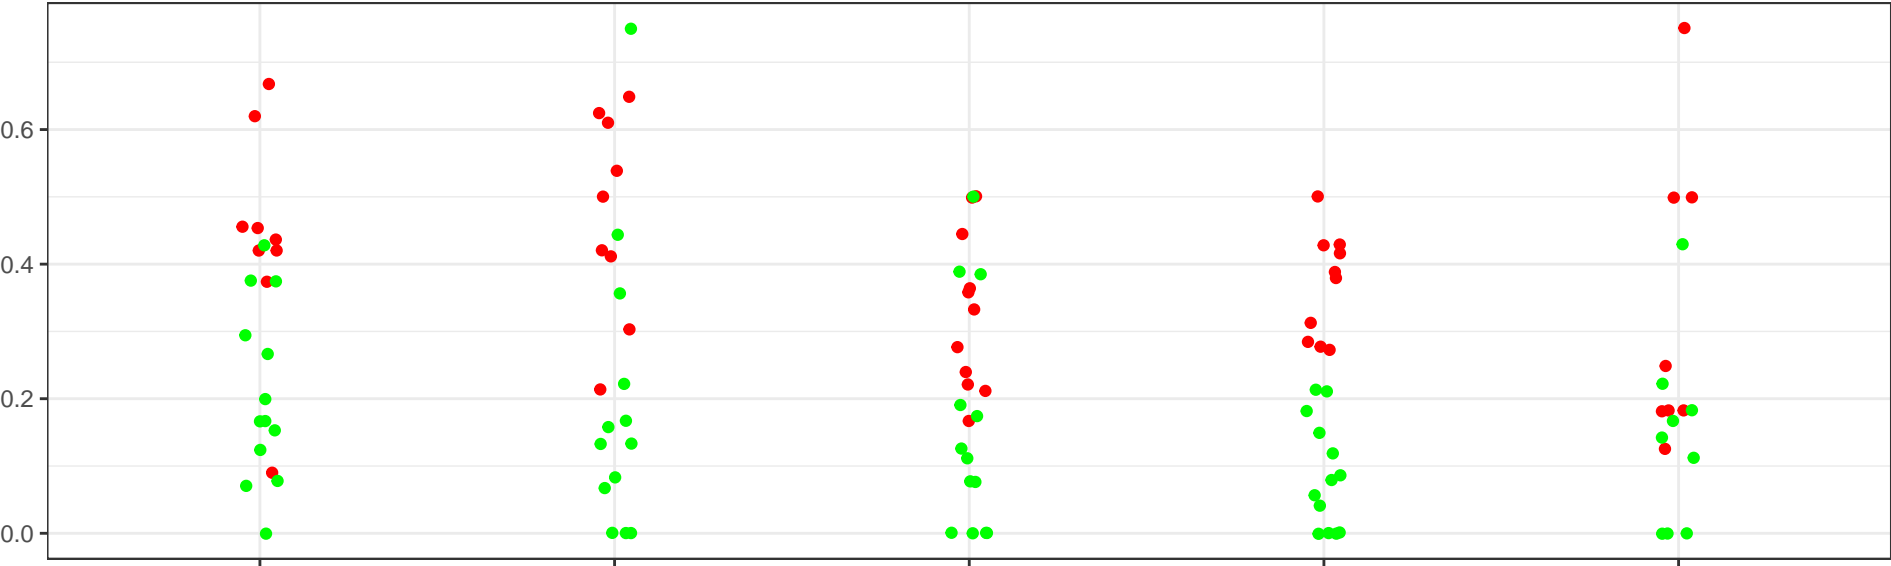

# LINC01948

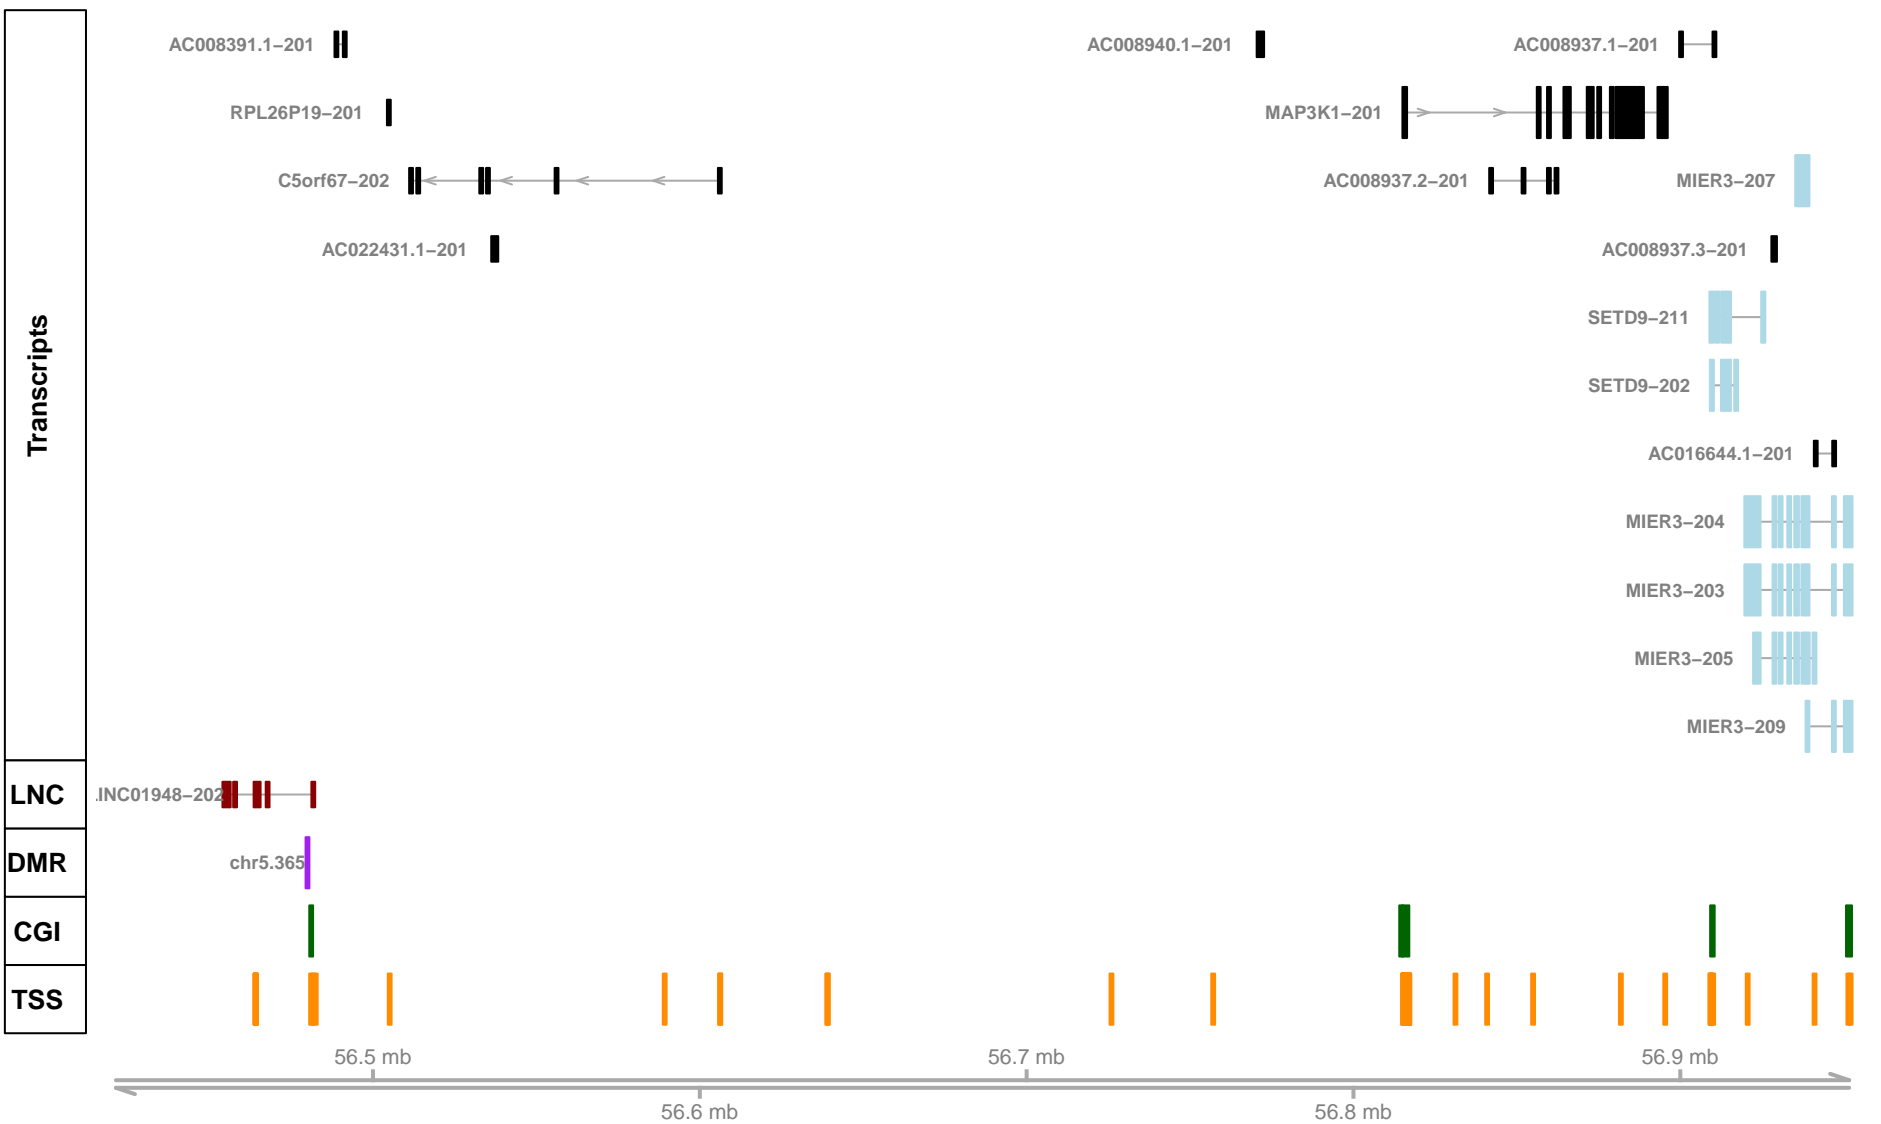

## chr5.365

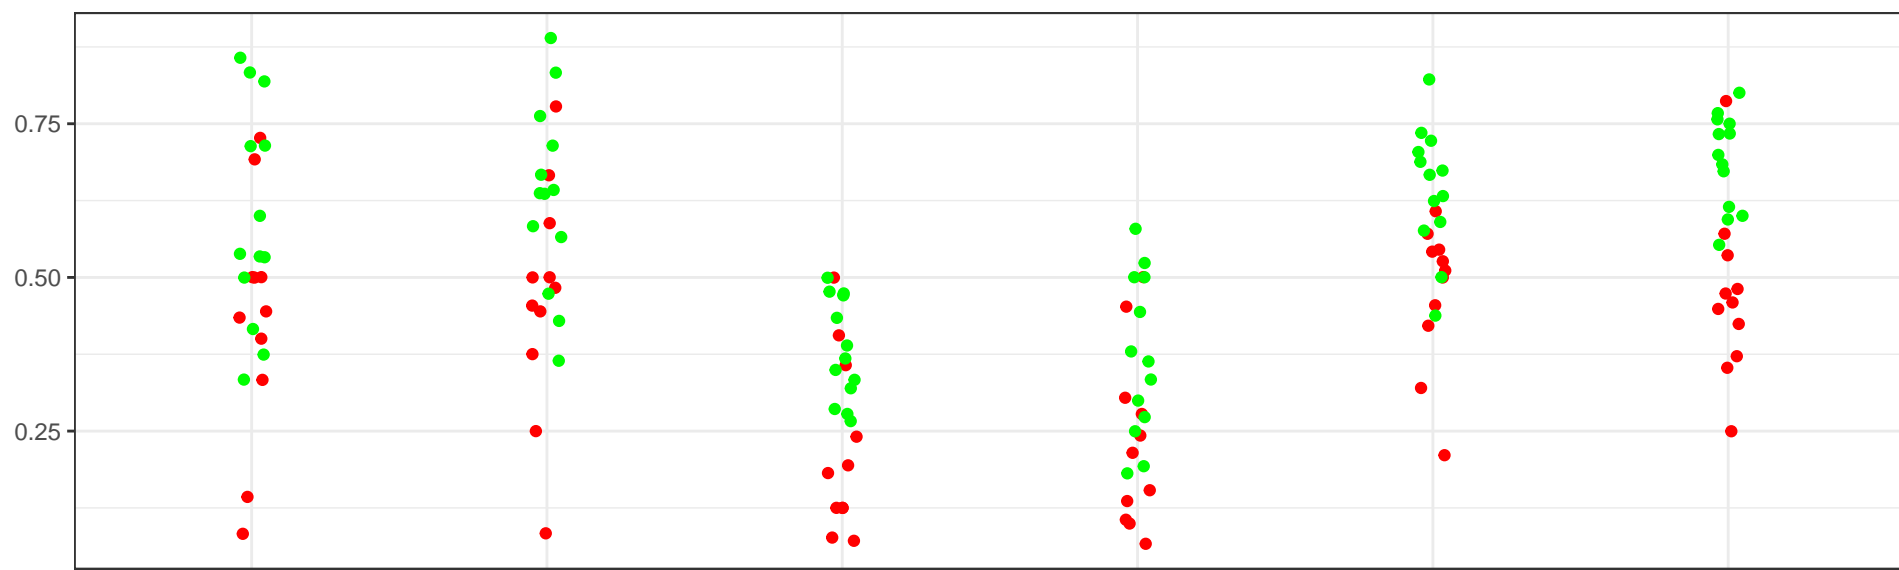

# LINC02057

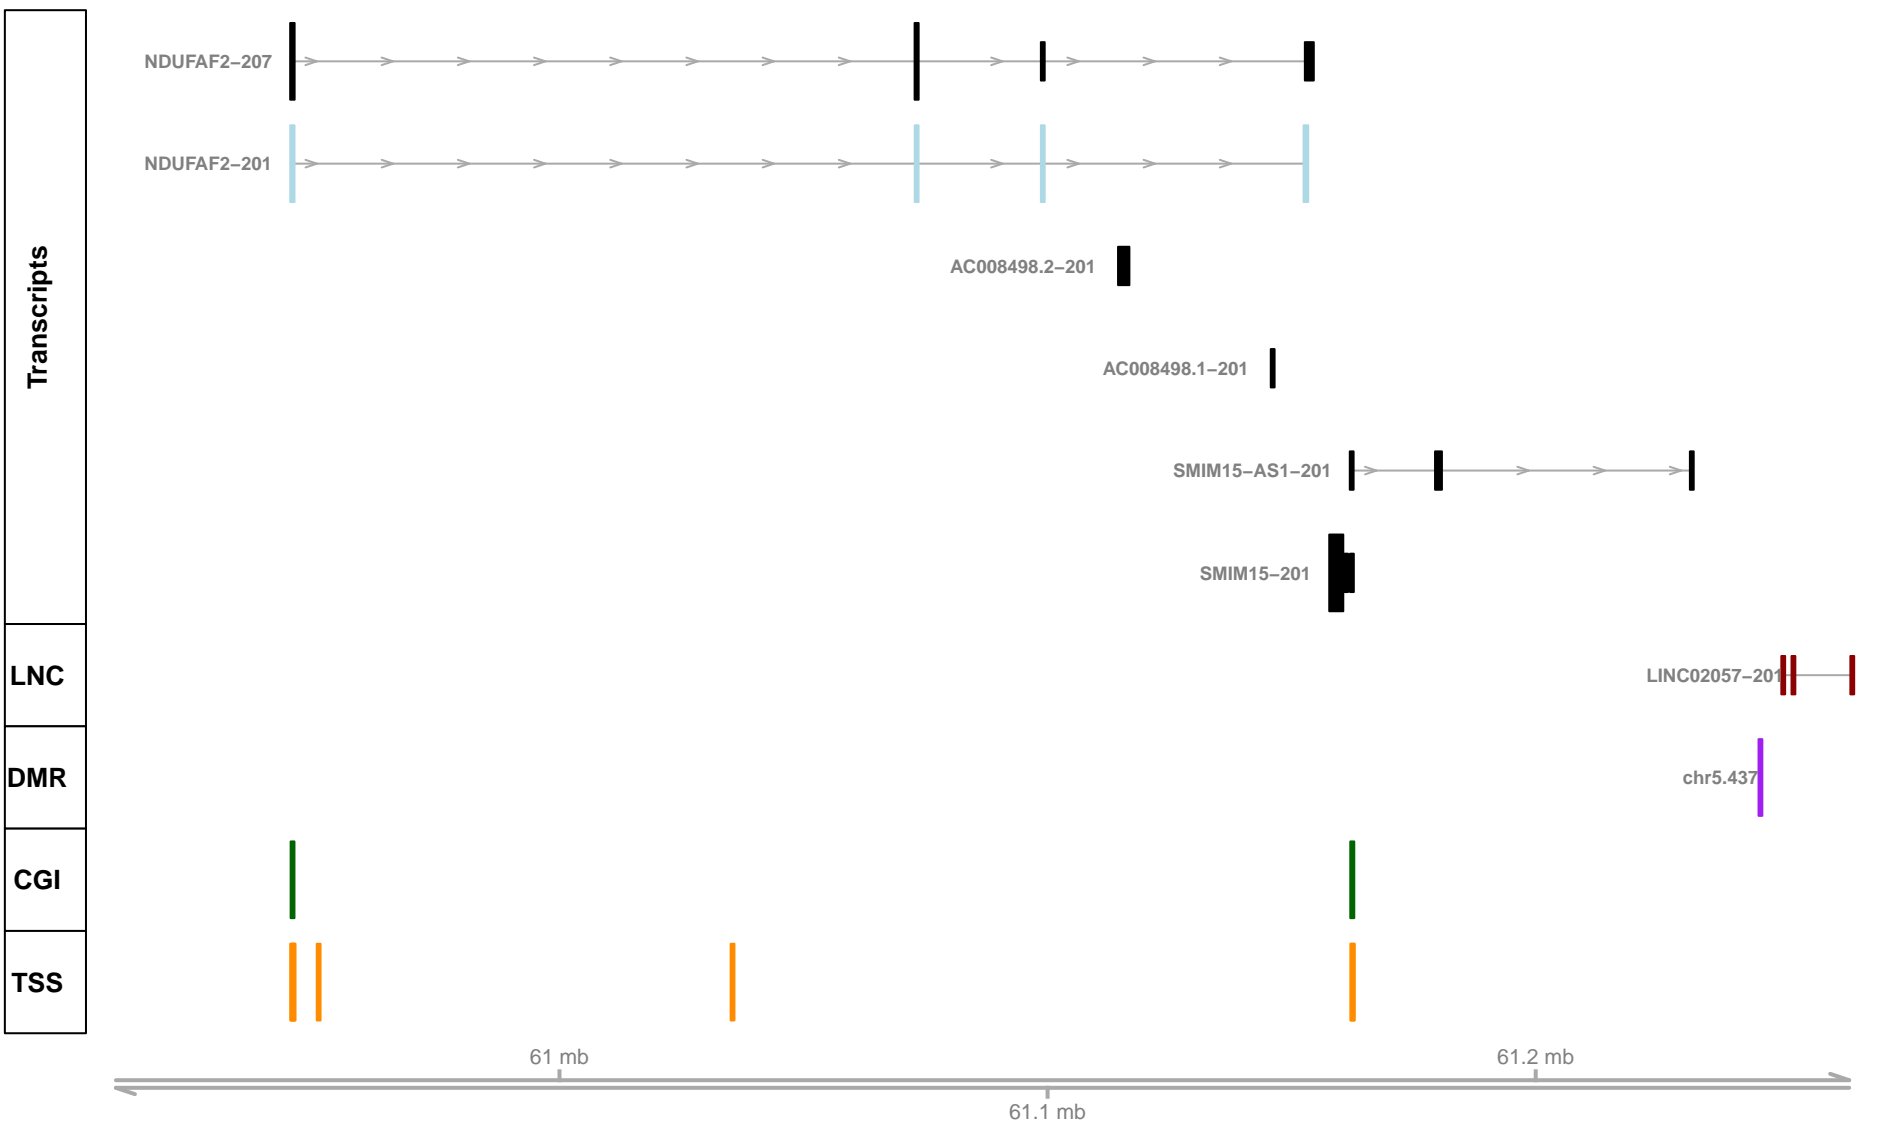

## chr5.437

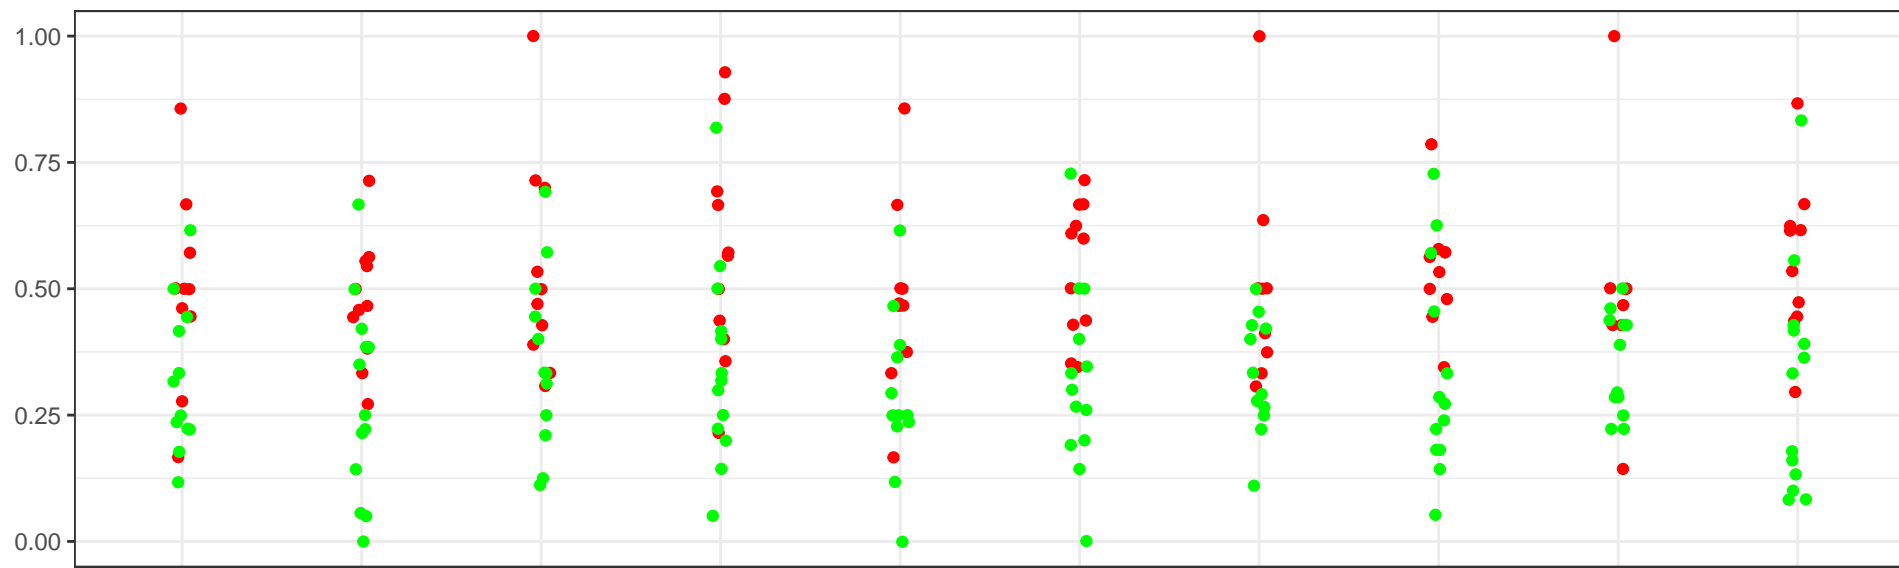

# LINC02090

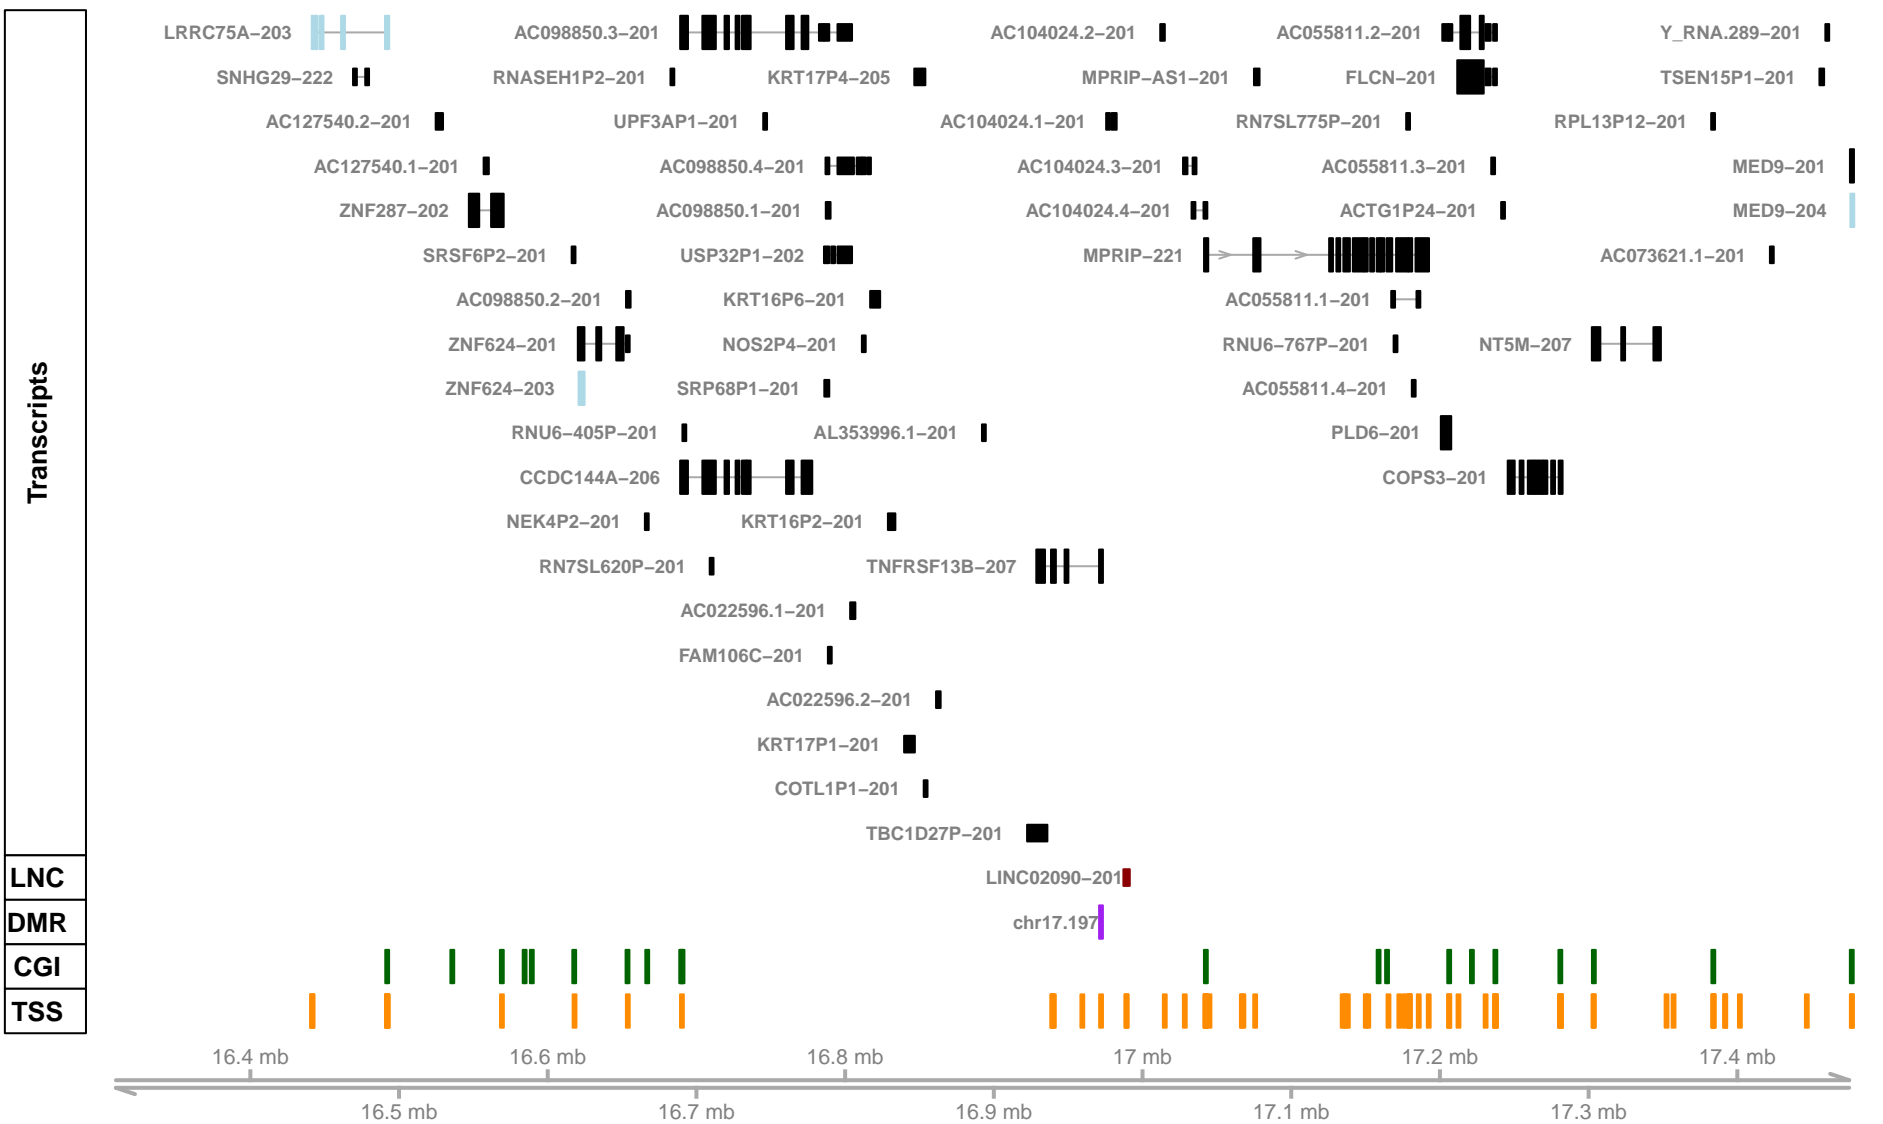

## chr17.197

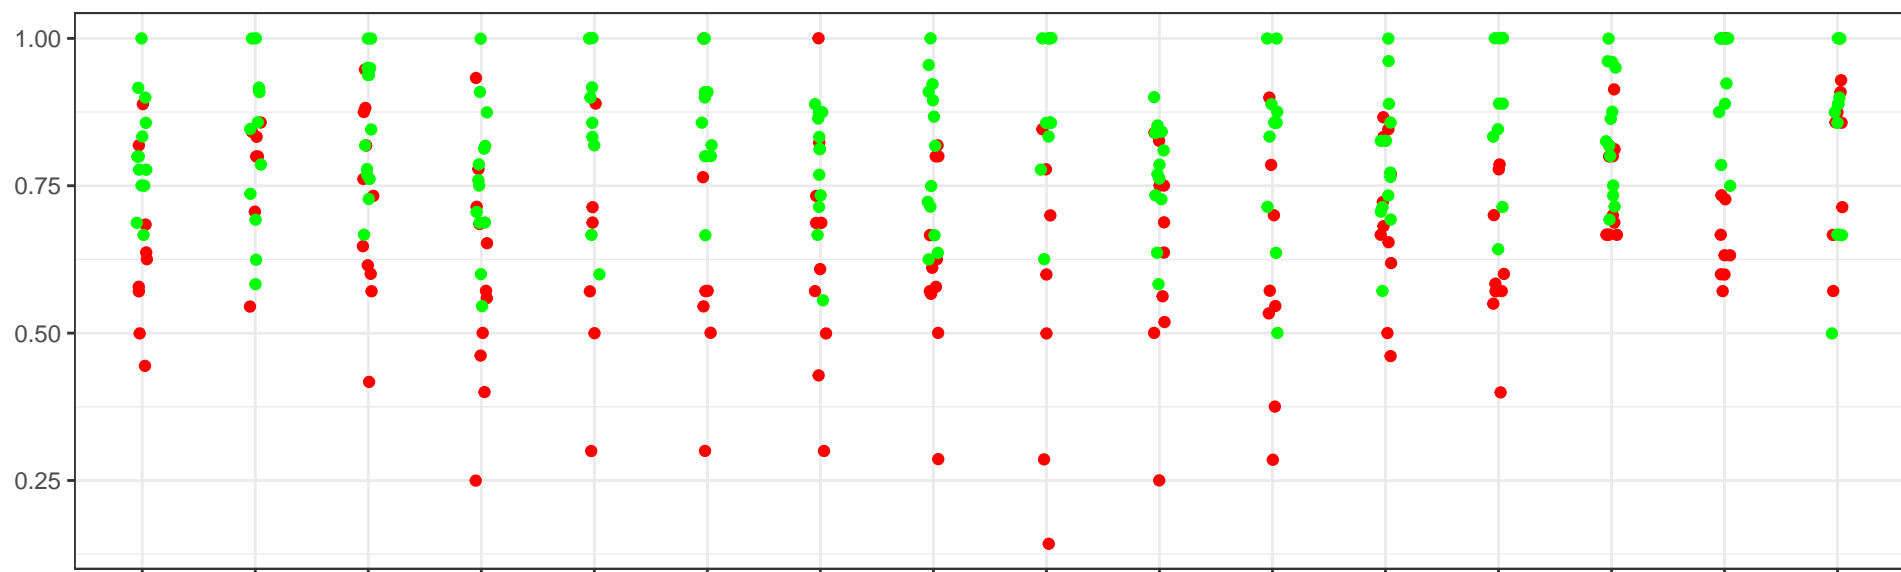

# LINC02352

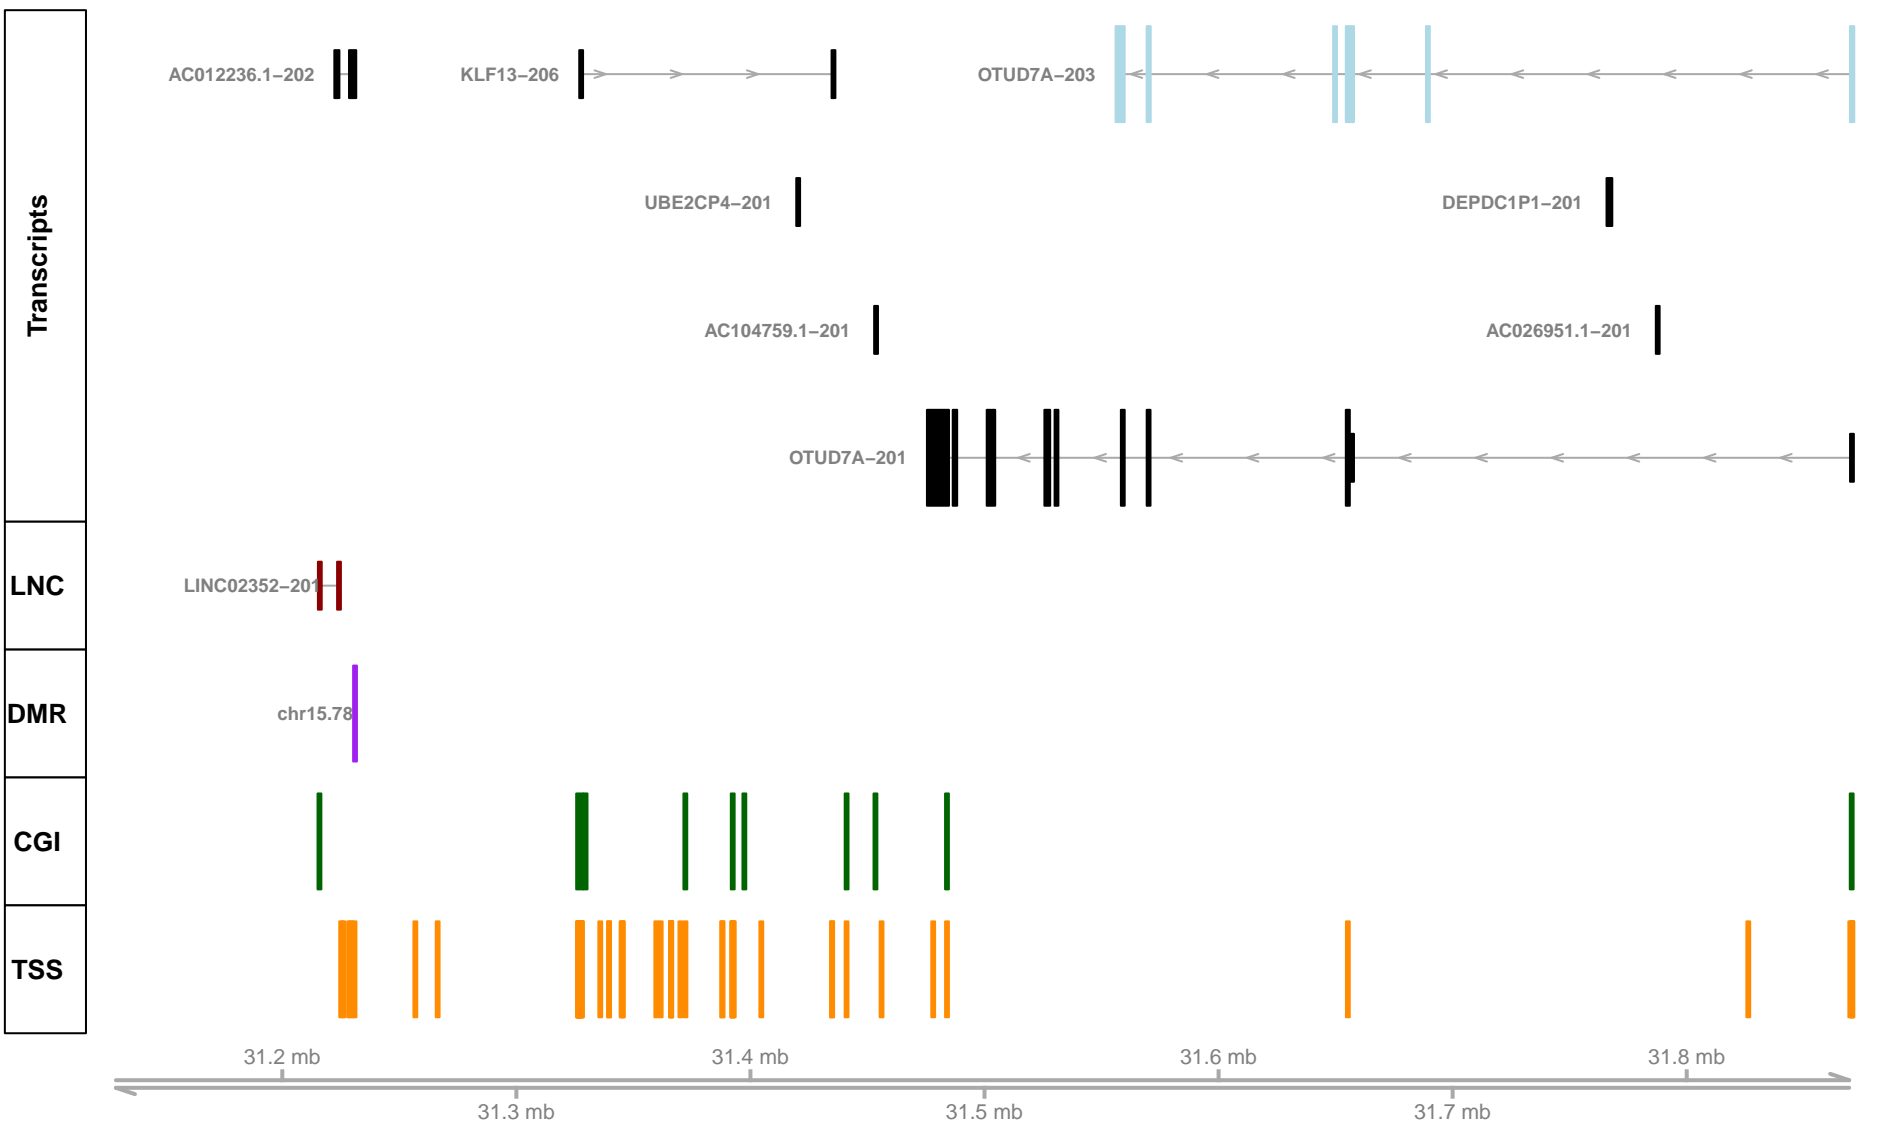

## chr15.78

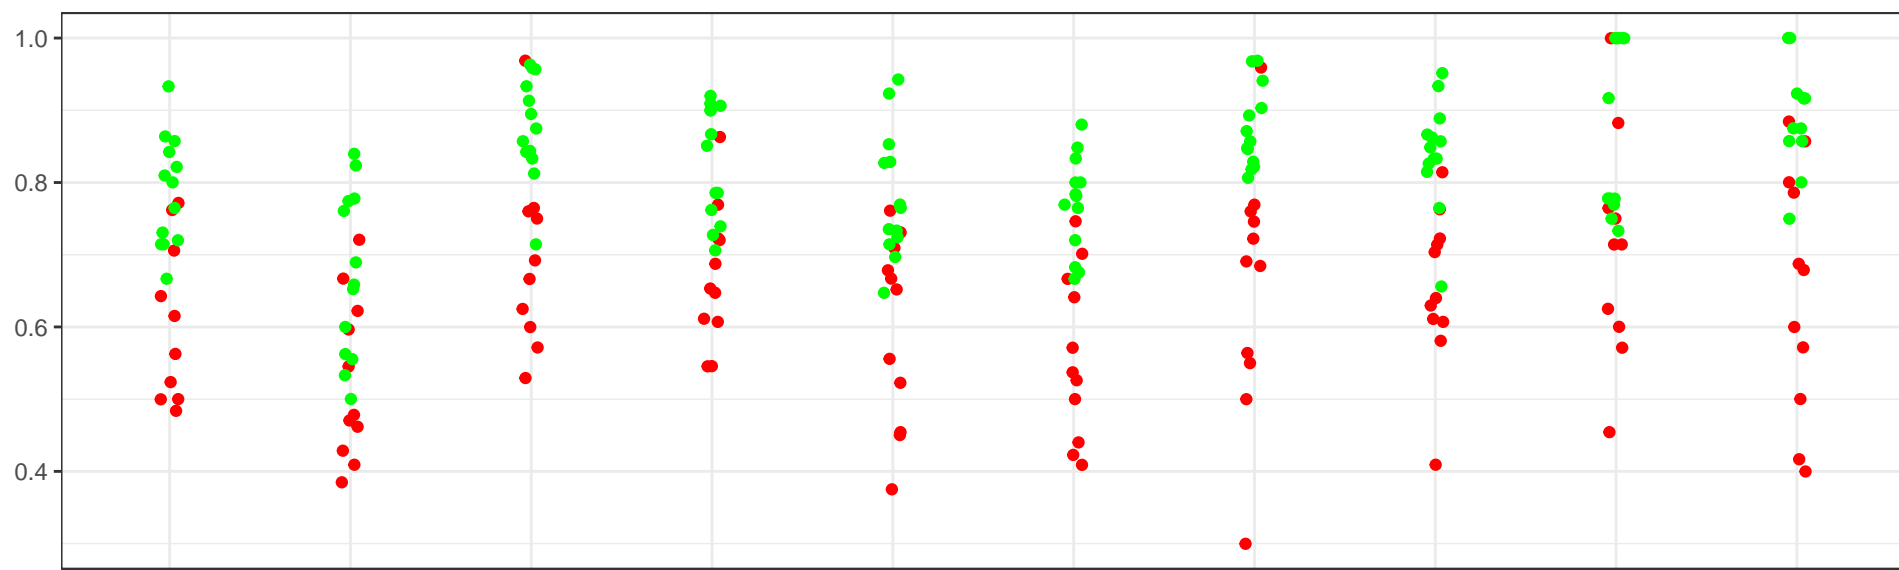

# LINC02384

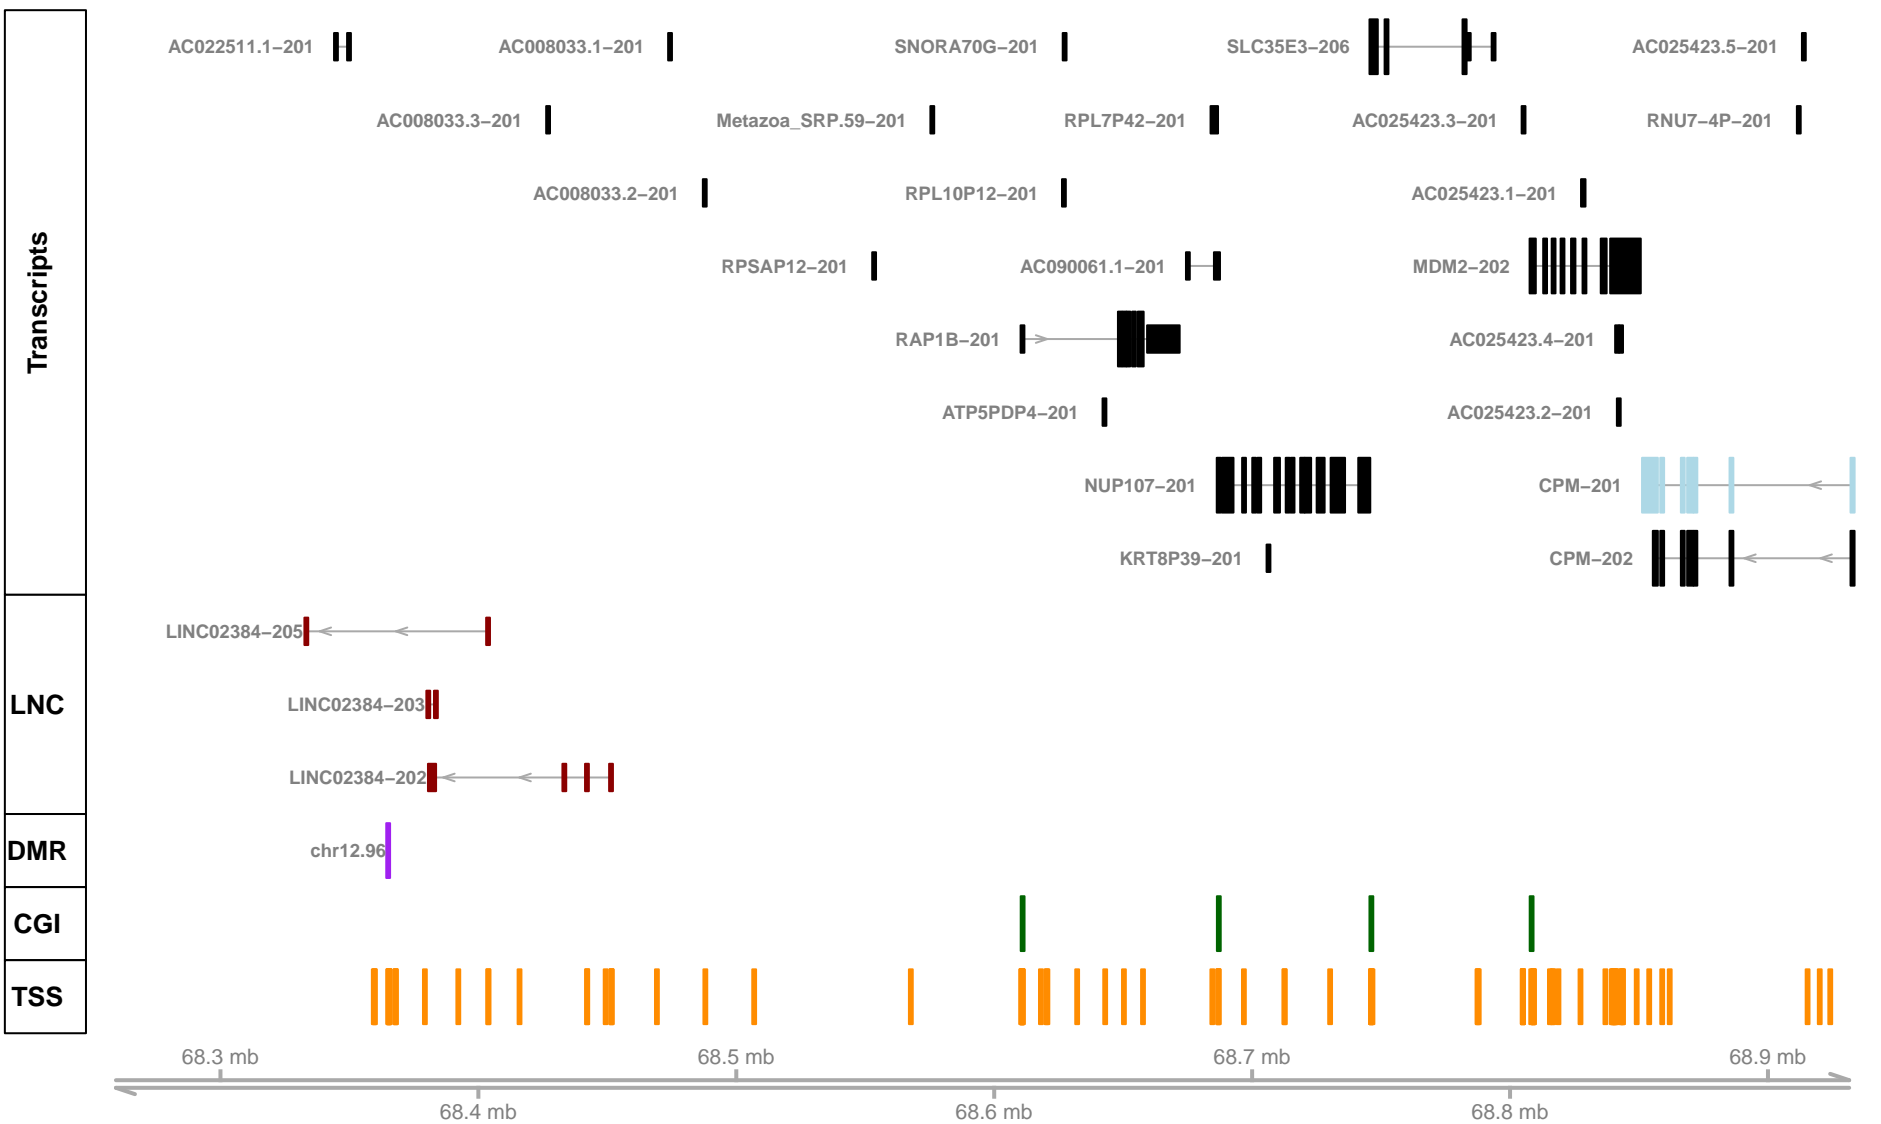

## chr12.96

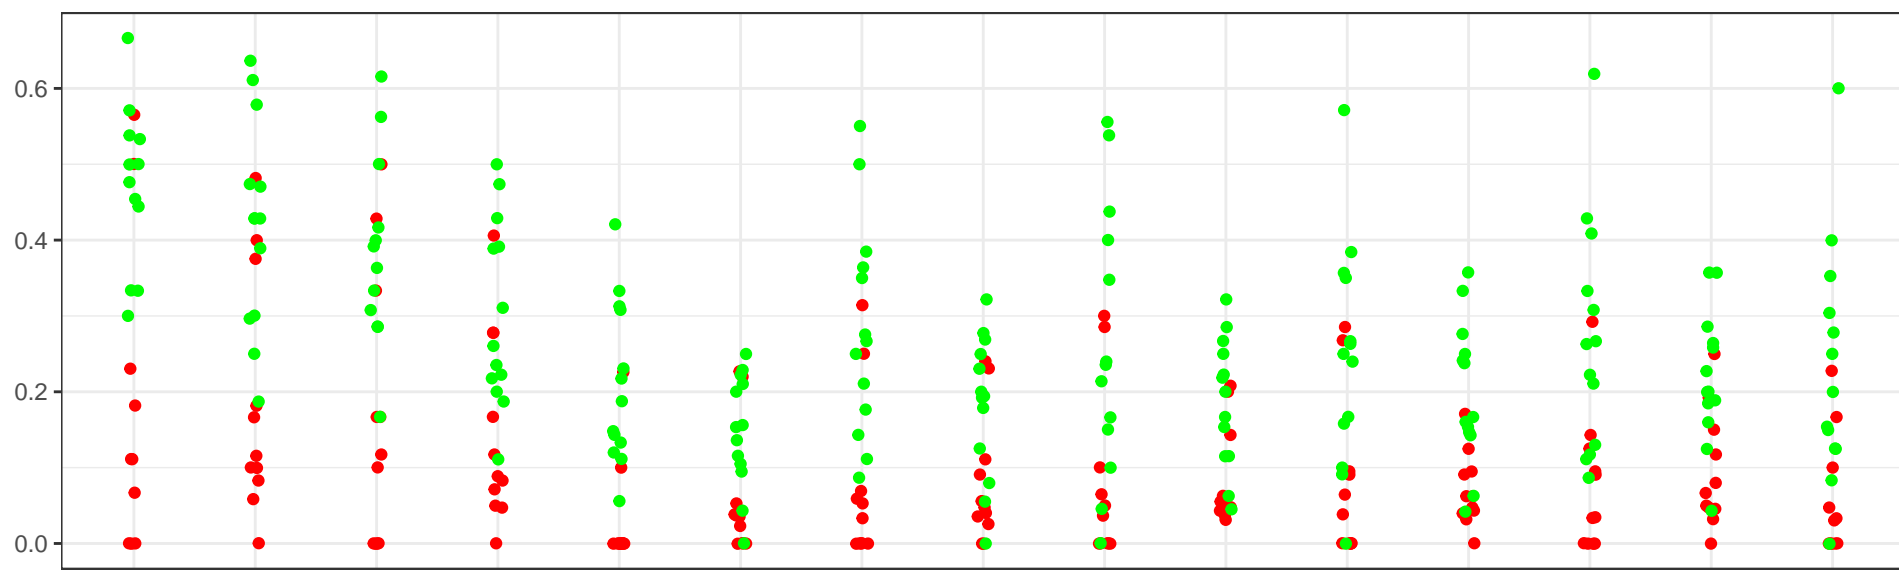

# LINC02458

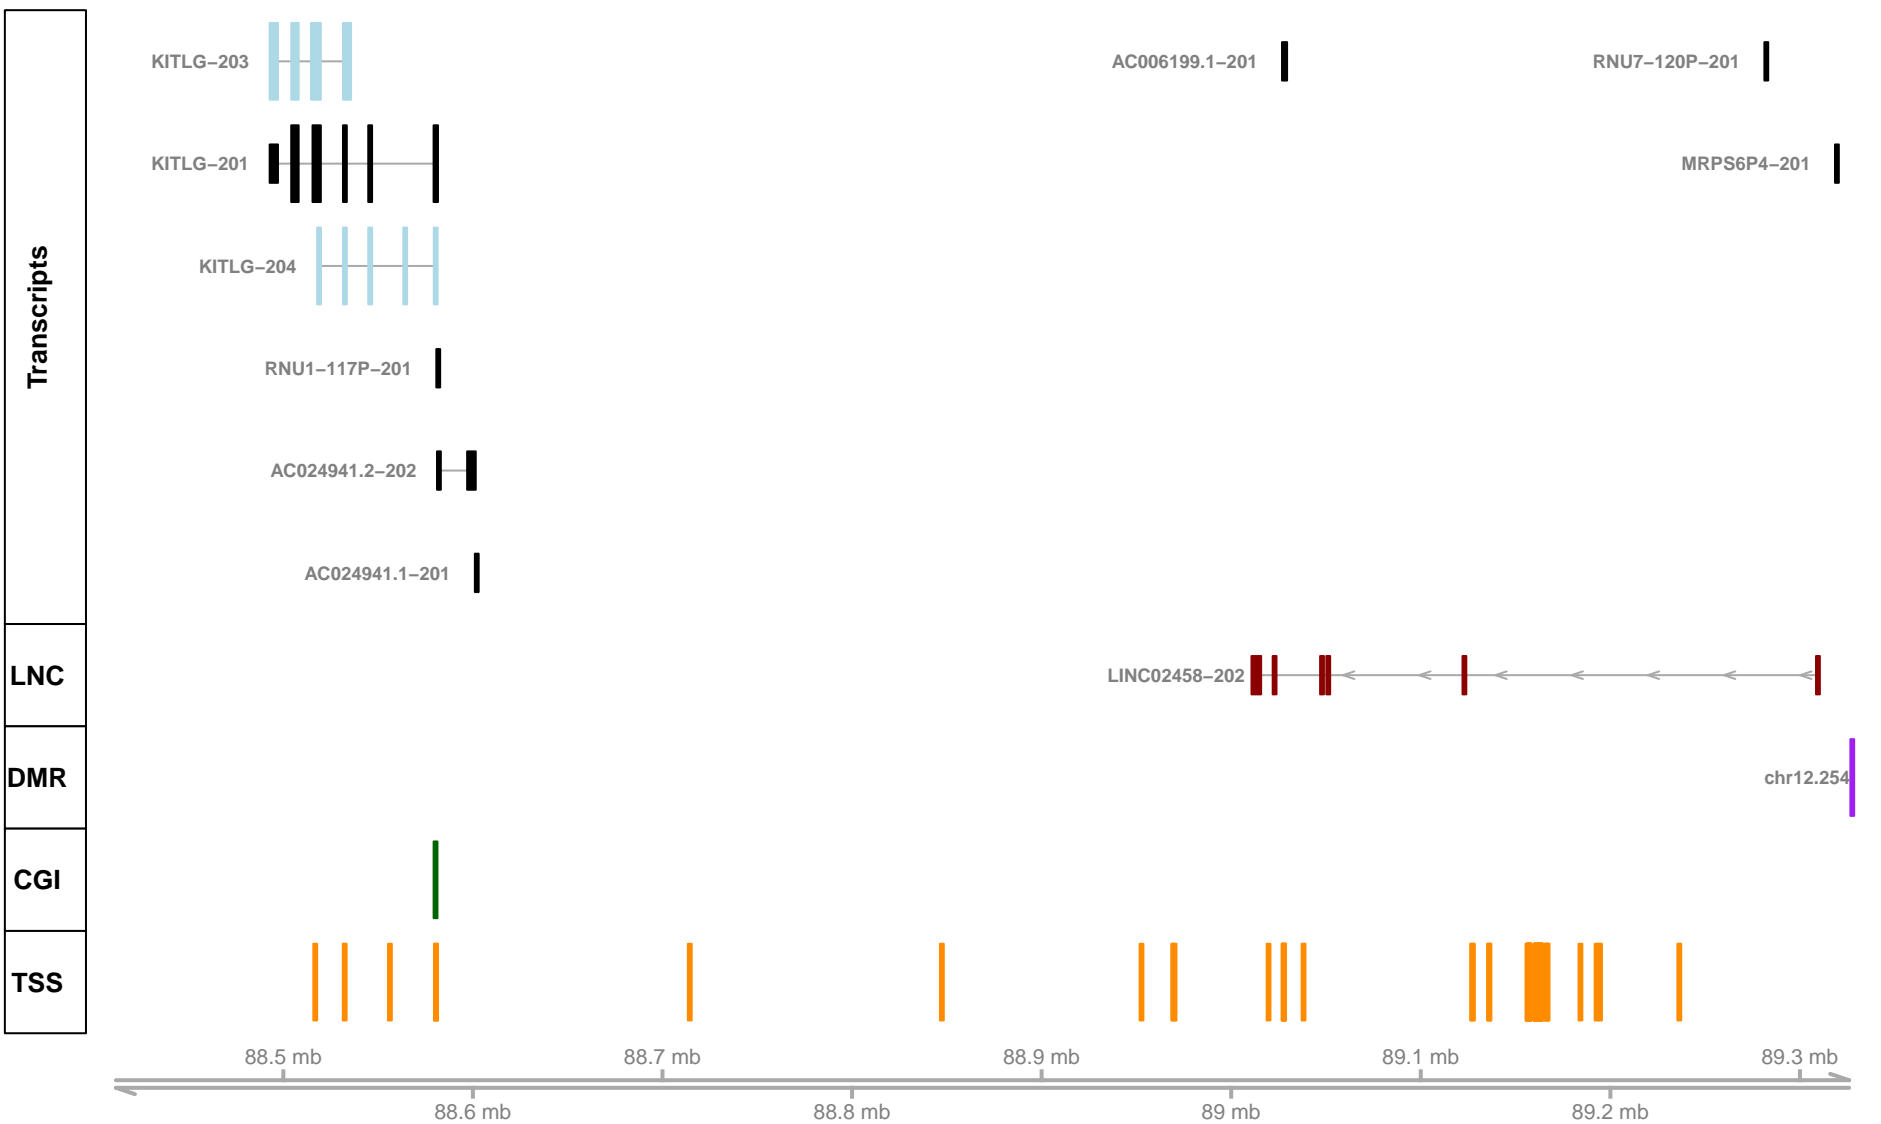

## chr12.254

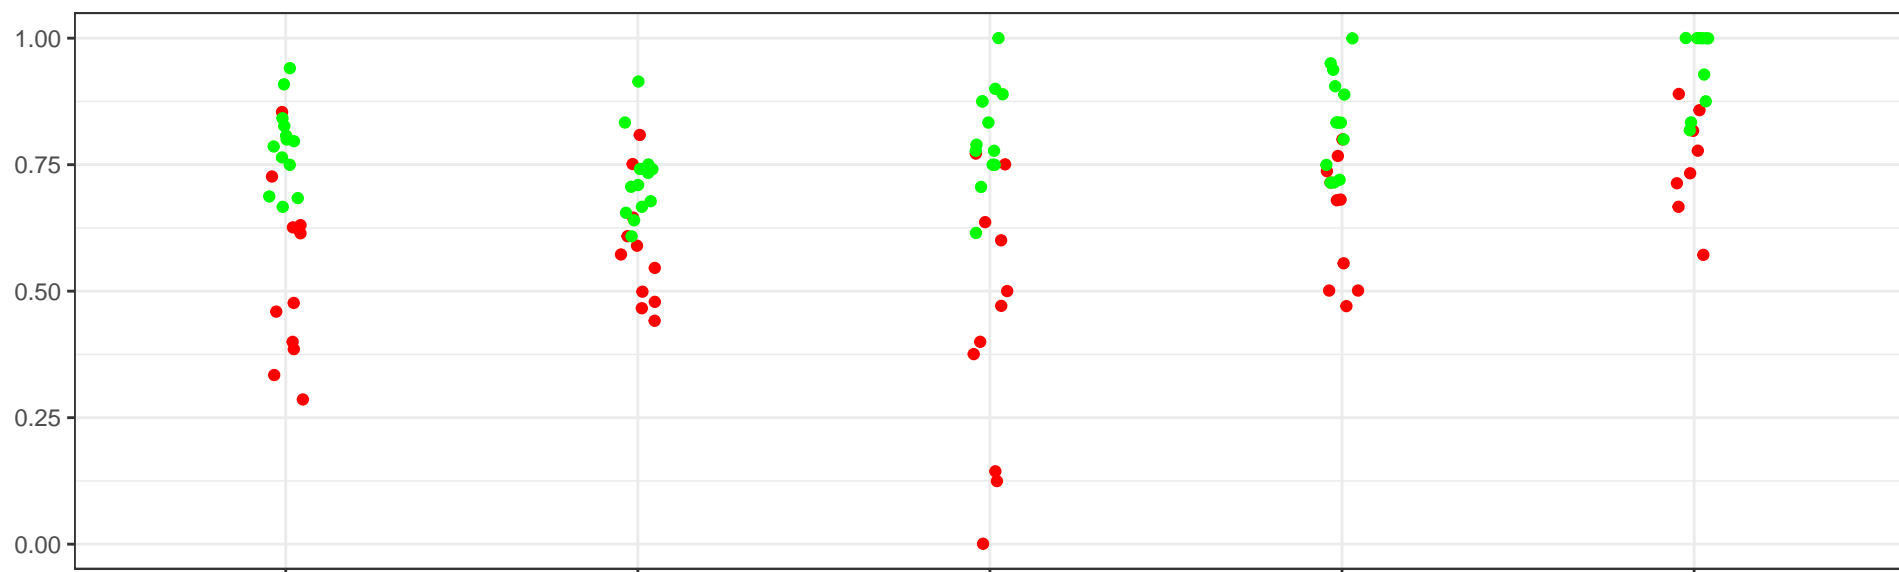

# LINC02642

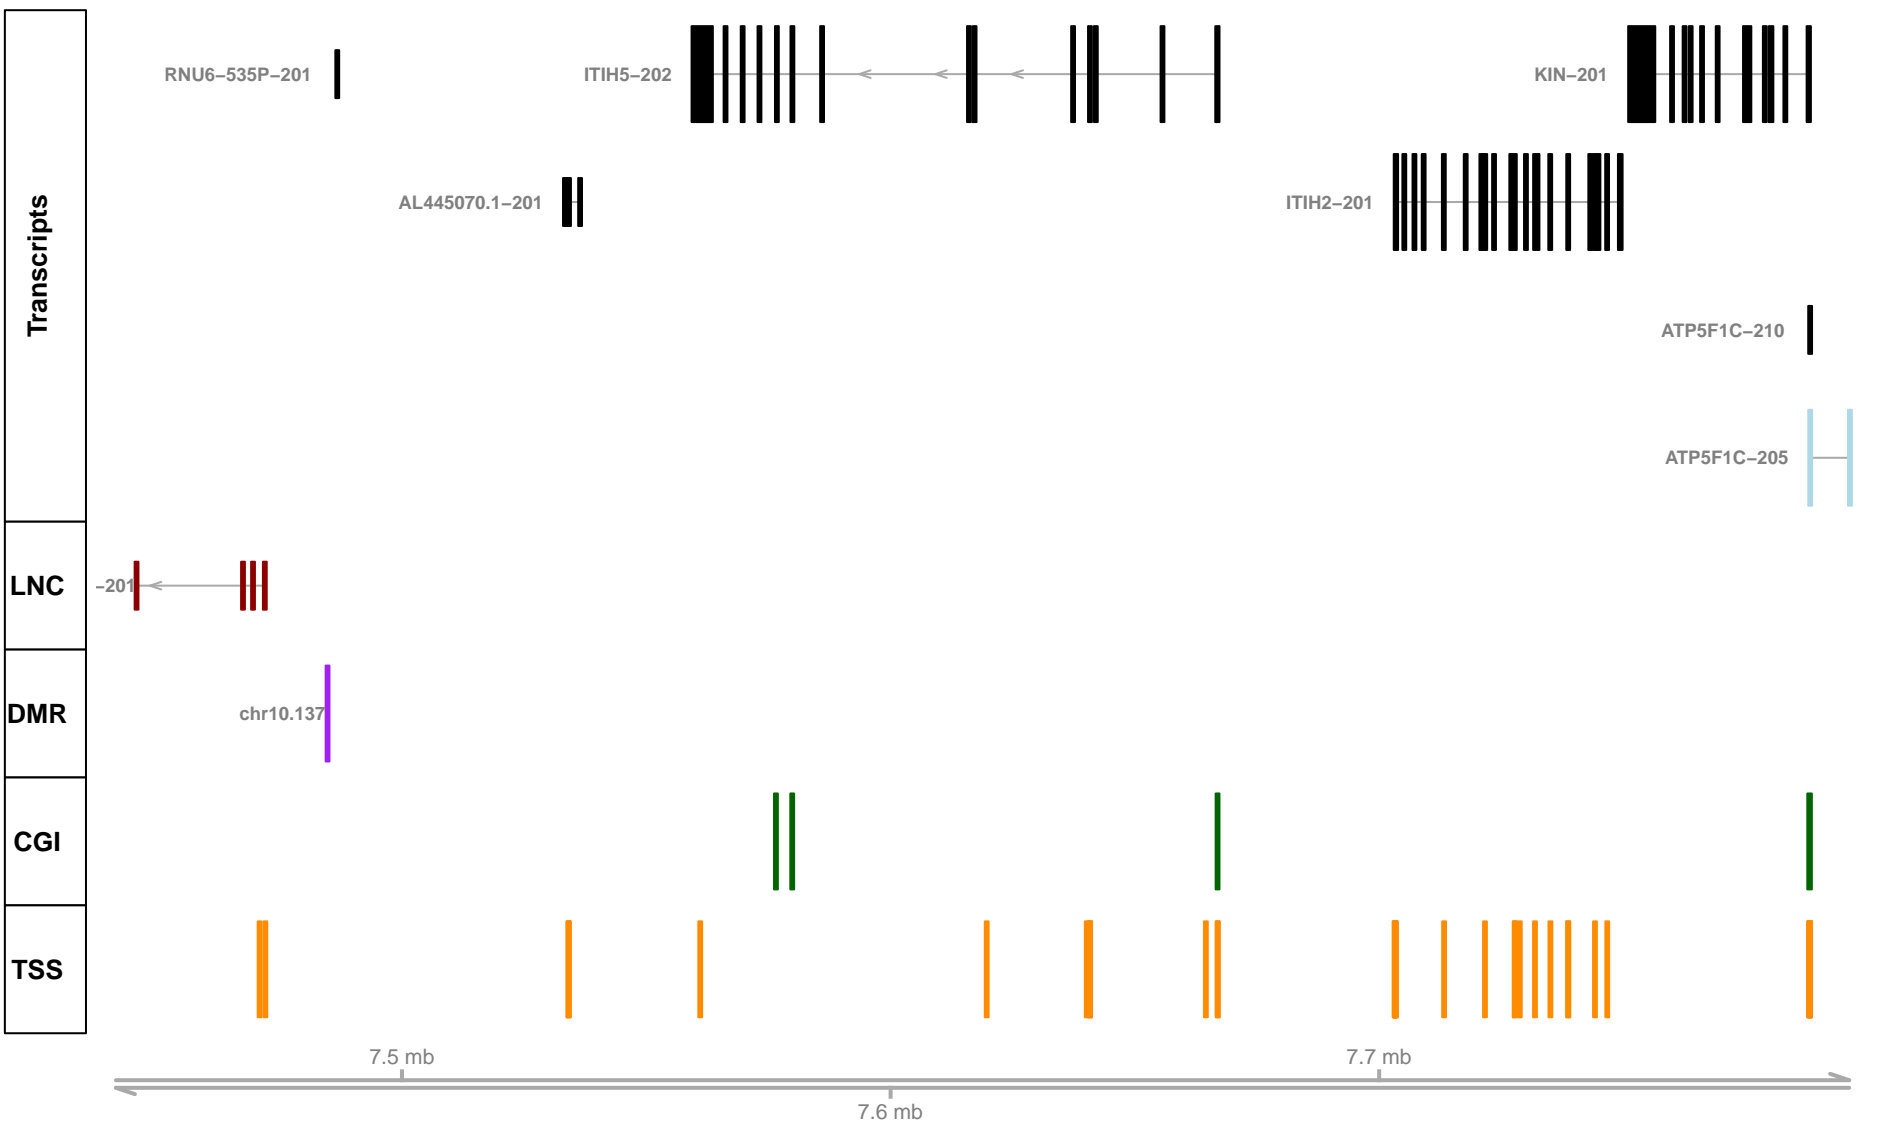

## chr10.137

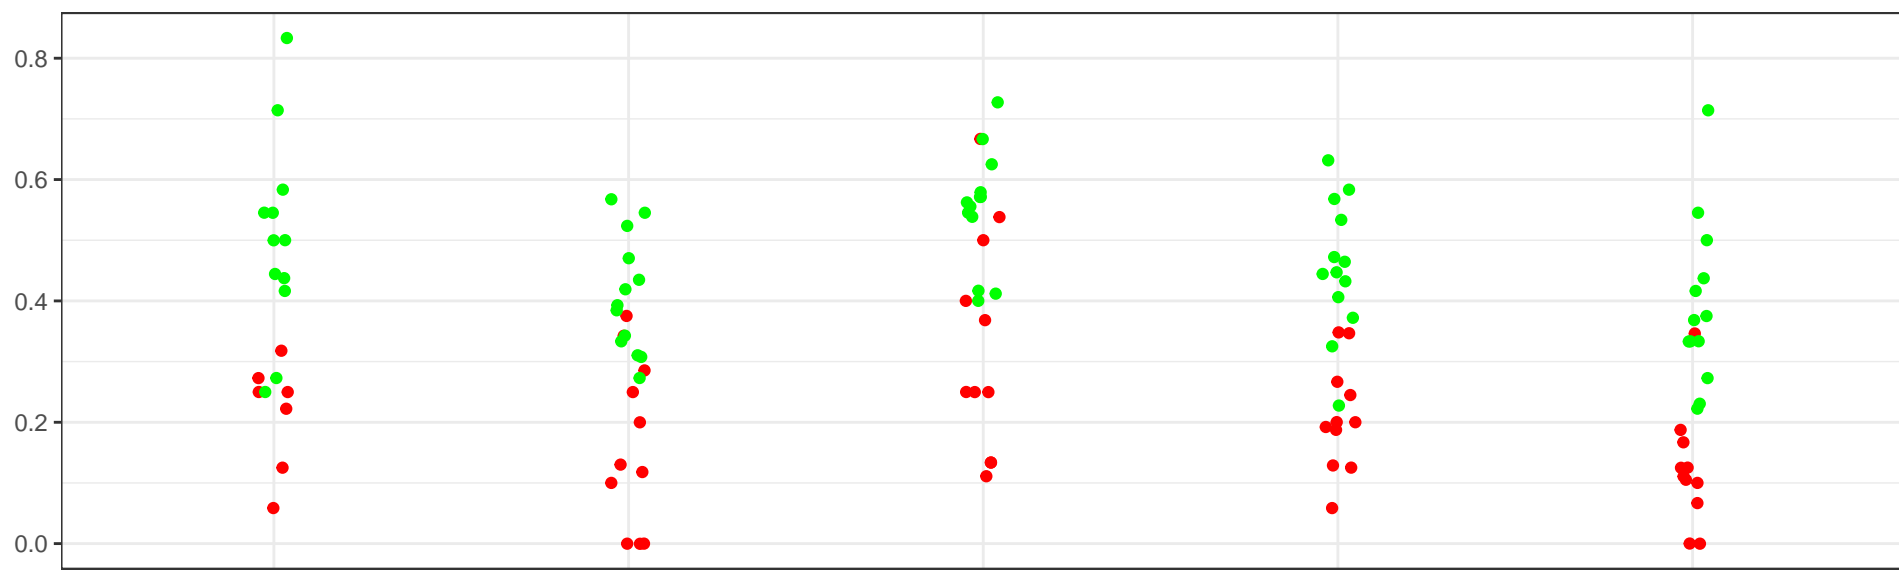

# LINC02863

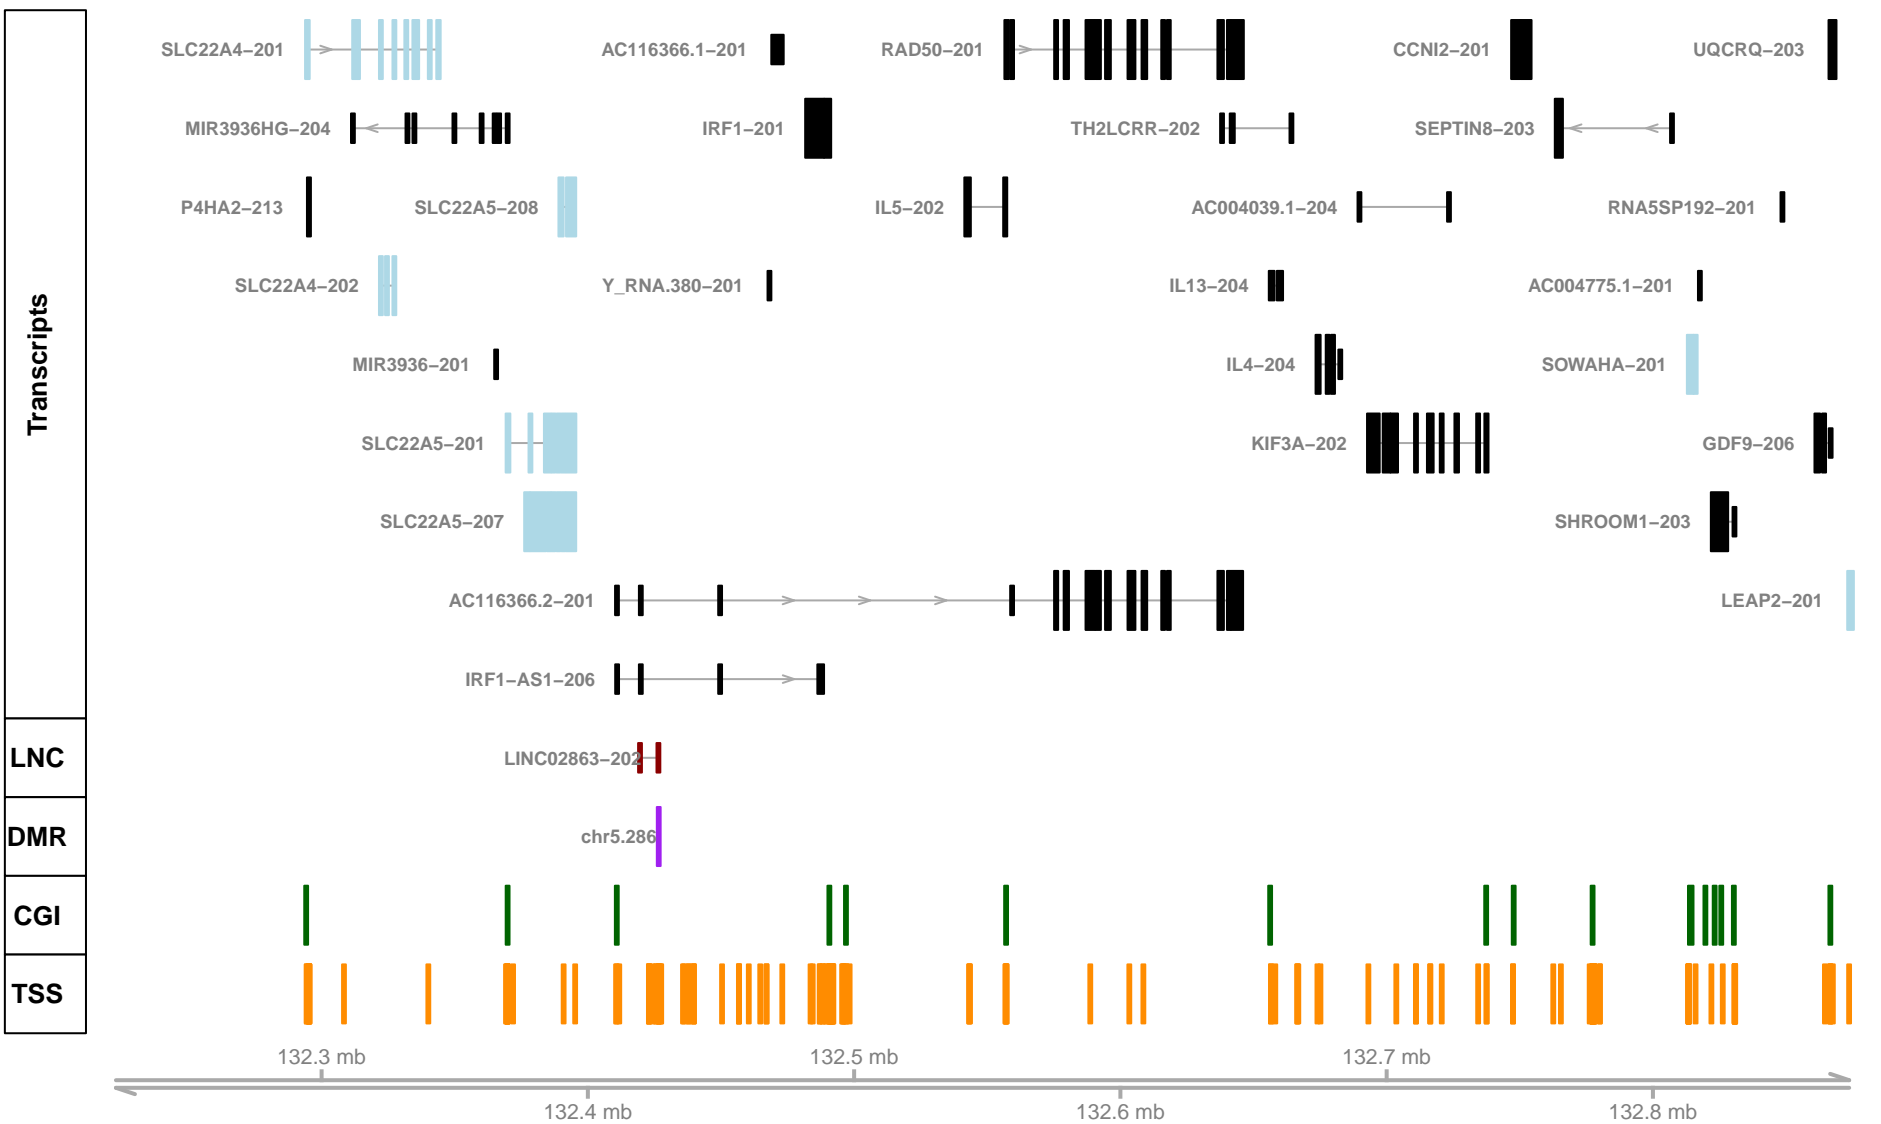

## chr5.286

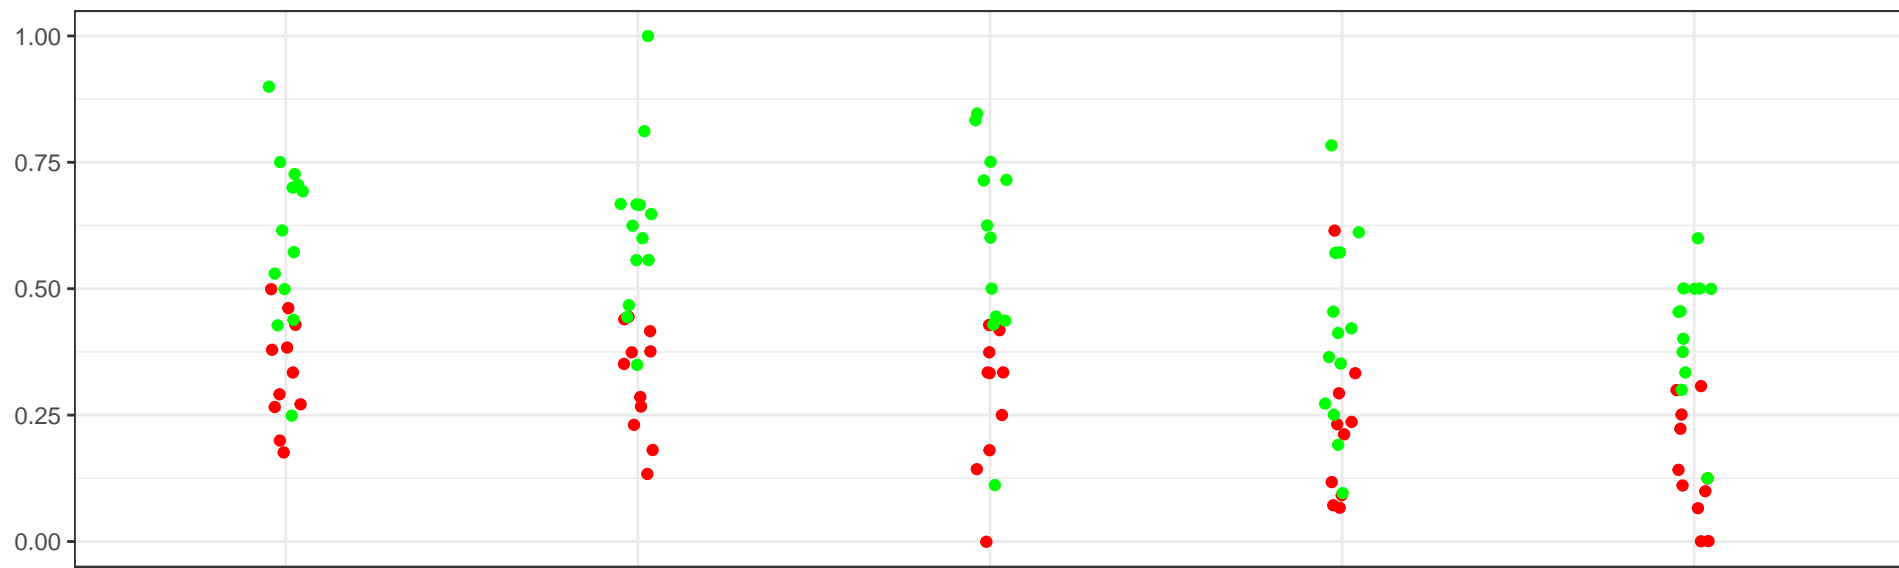

# LINC-PINT

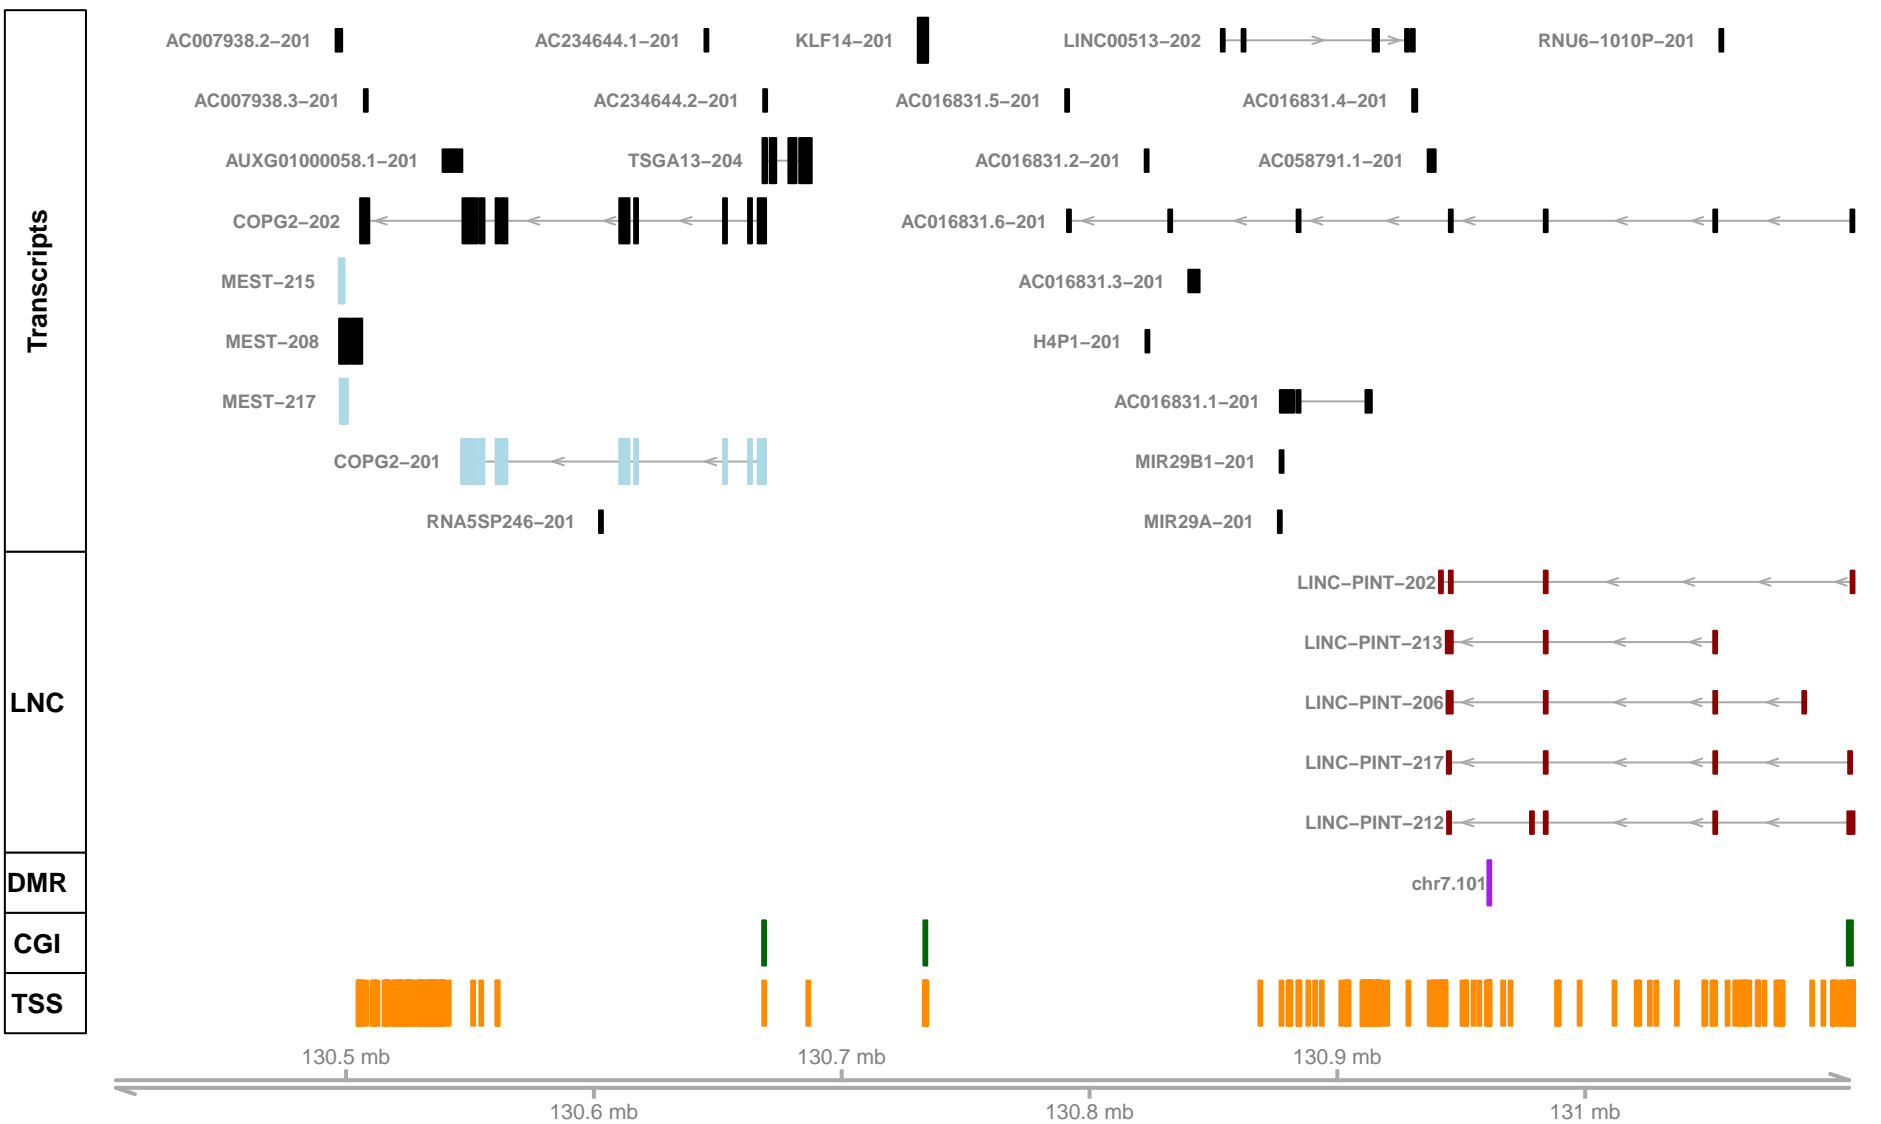

## chr7.101

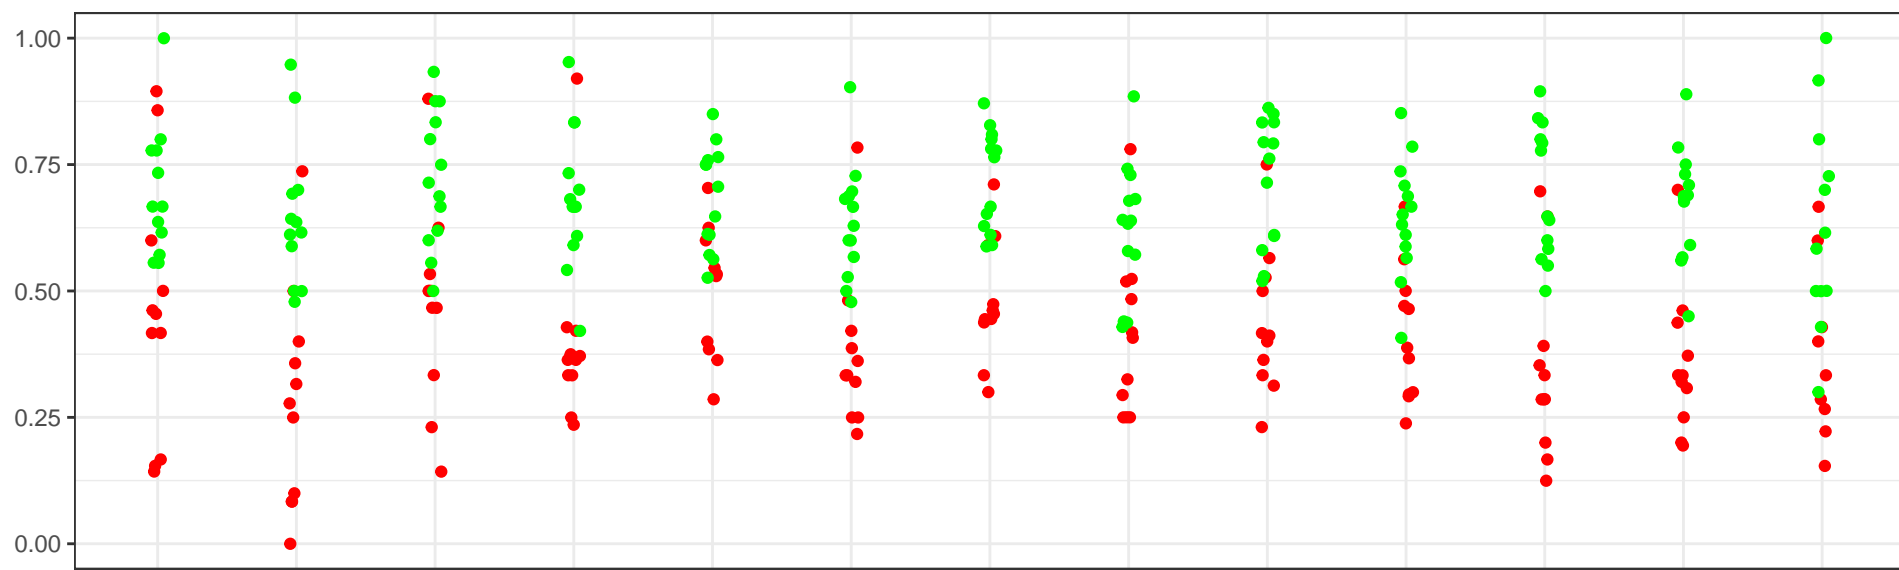

# MIR193BHG

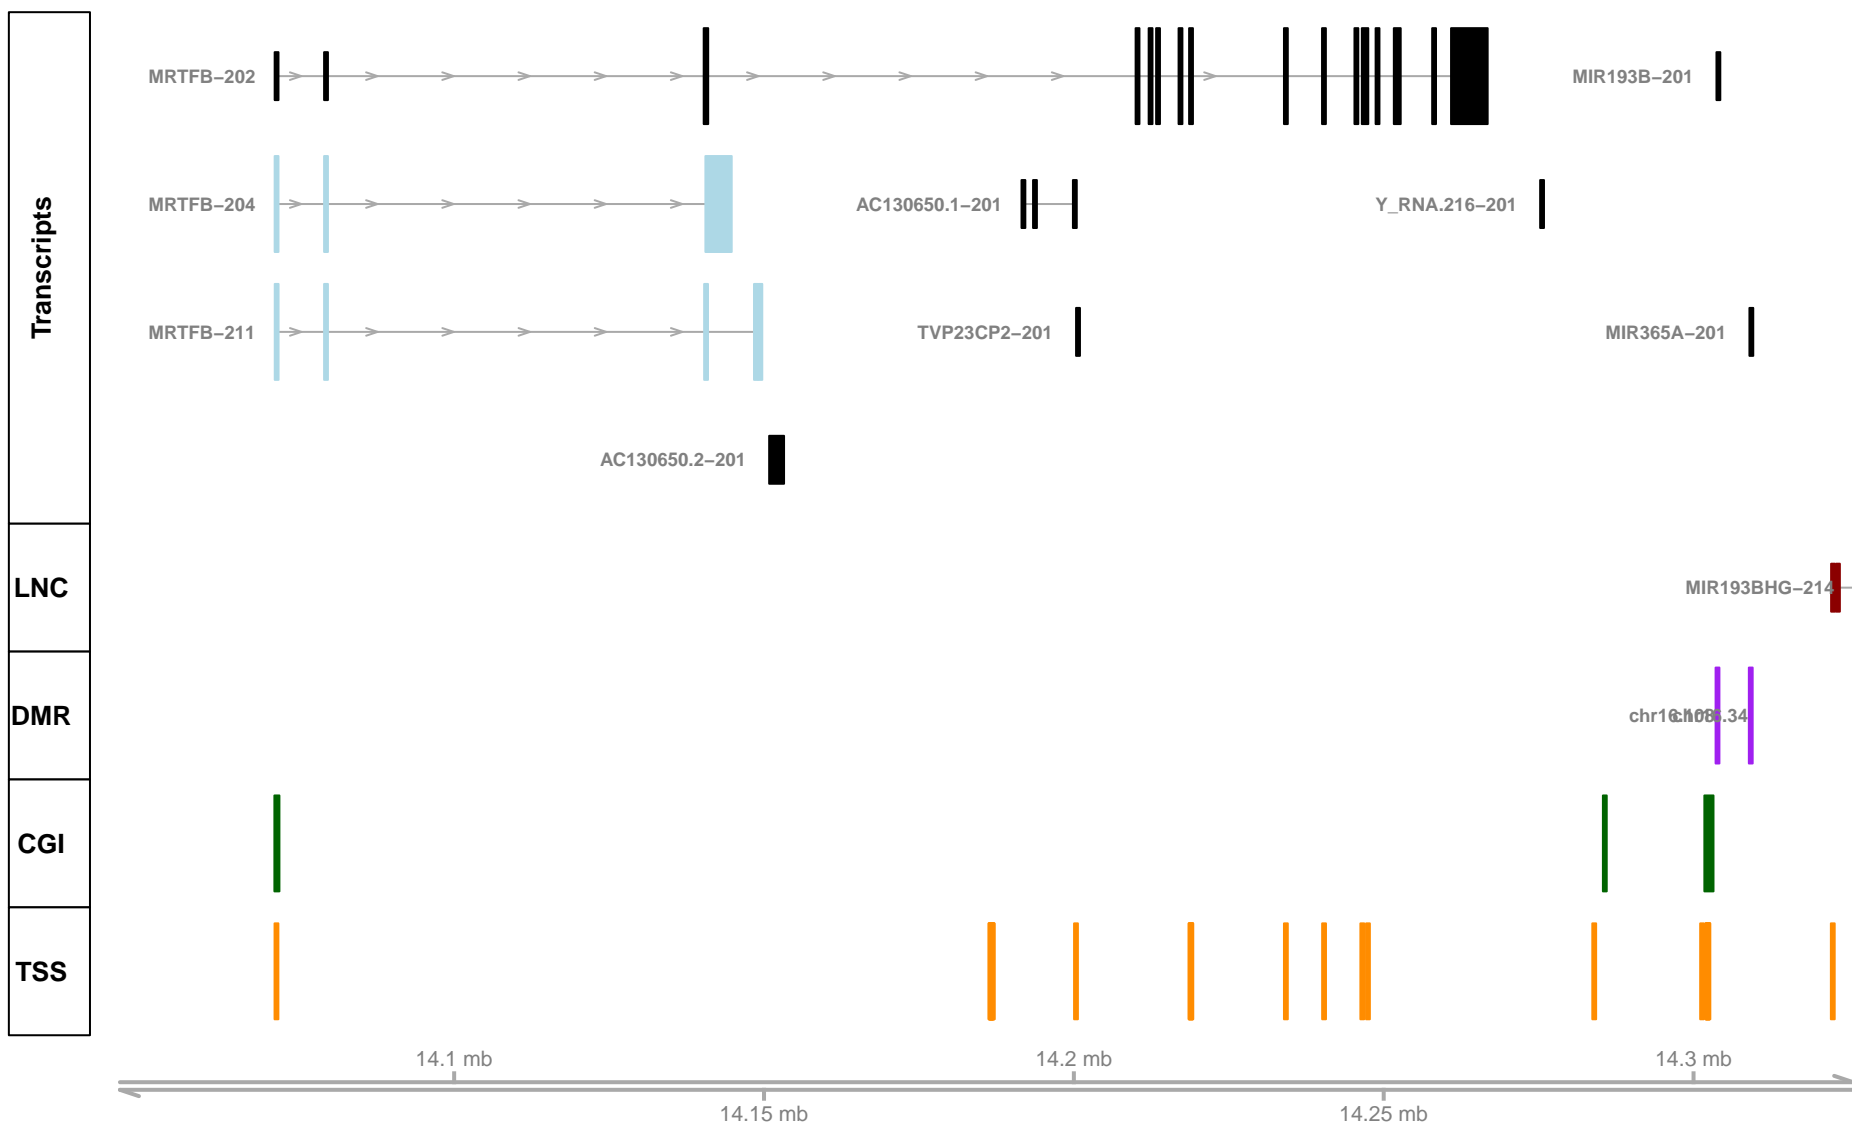

chr16.108

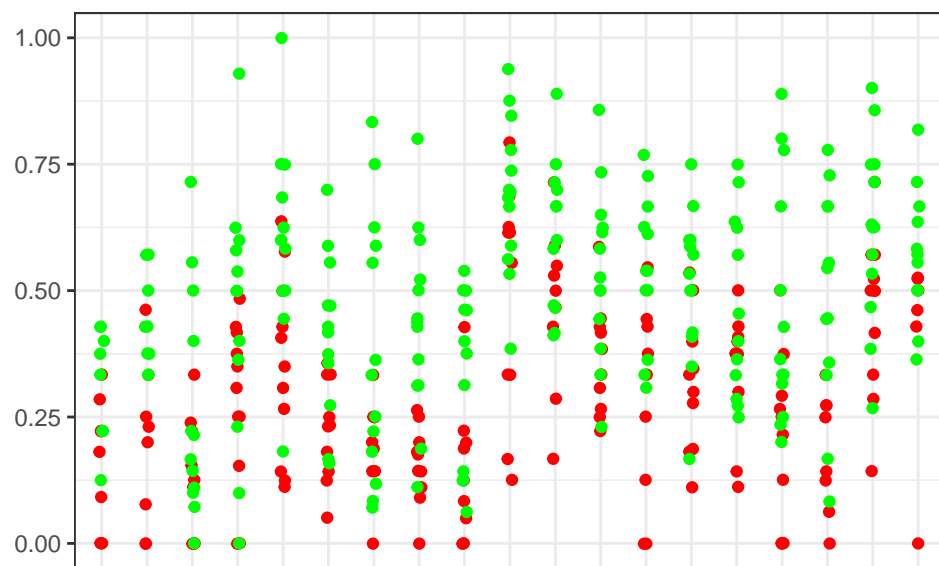

chr16.34

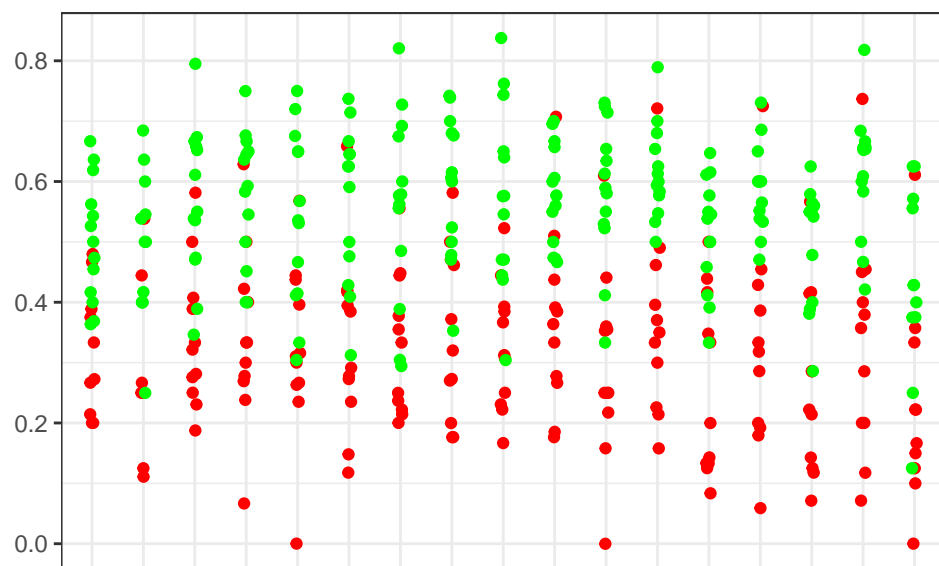

# MIR223HG

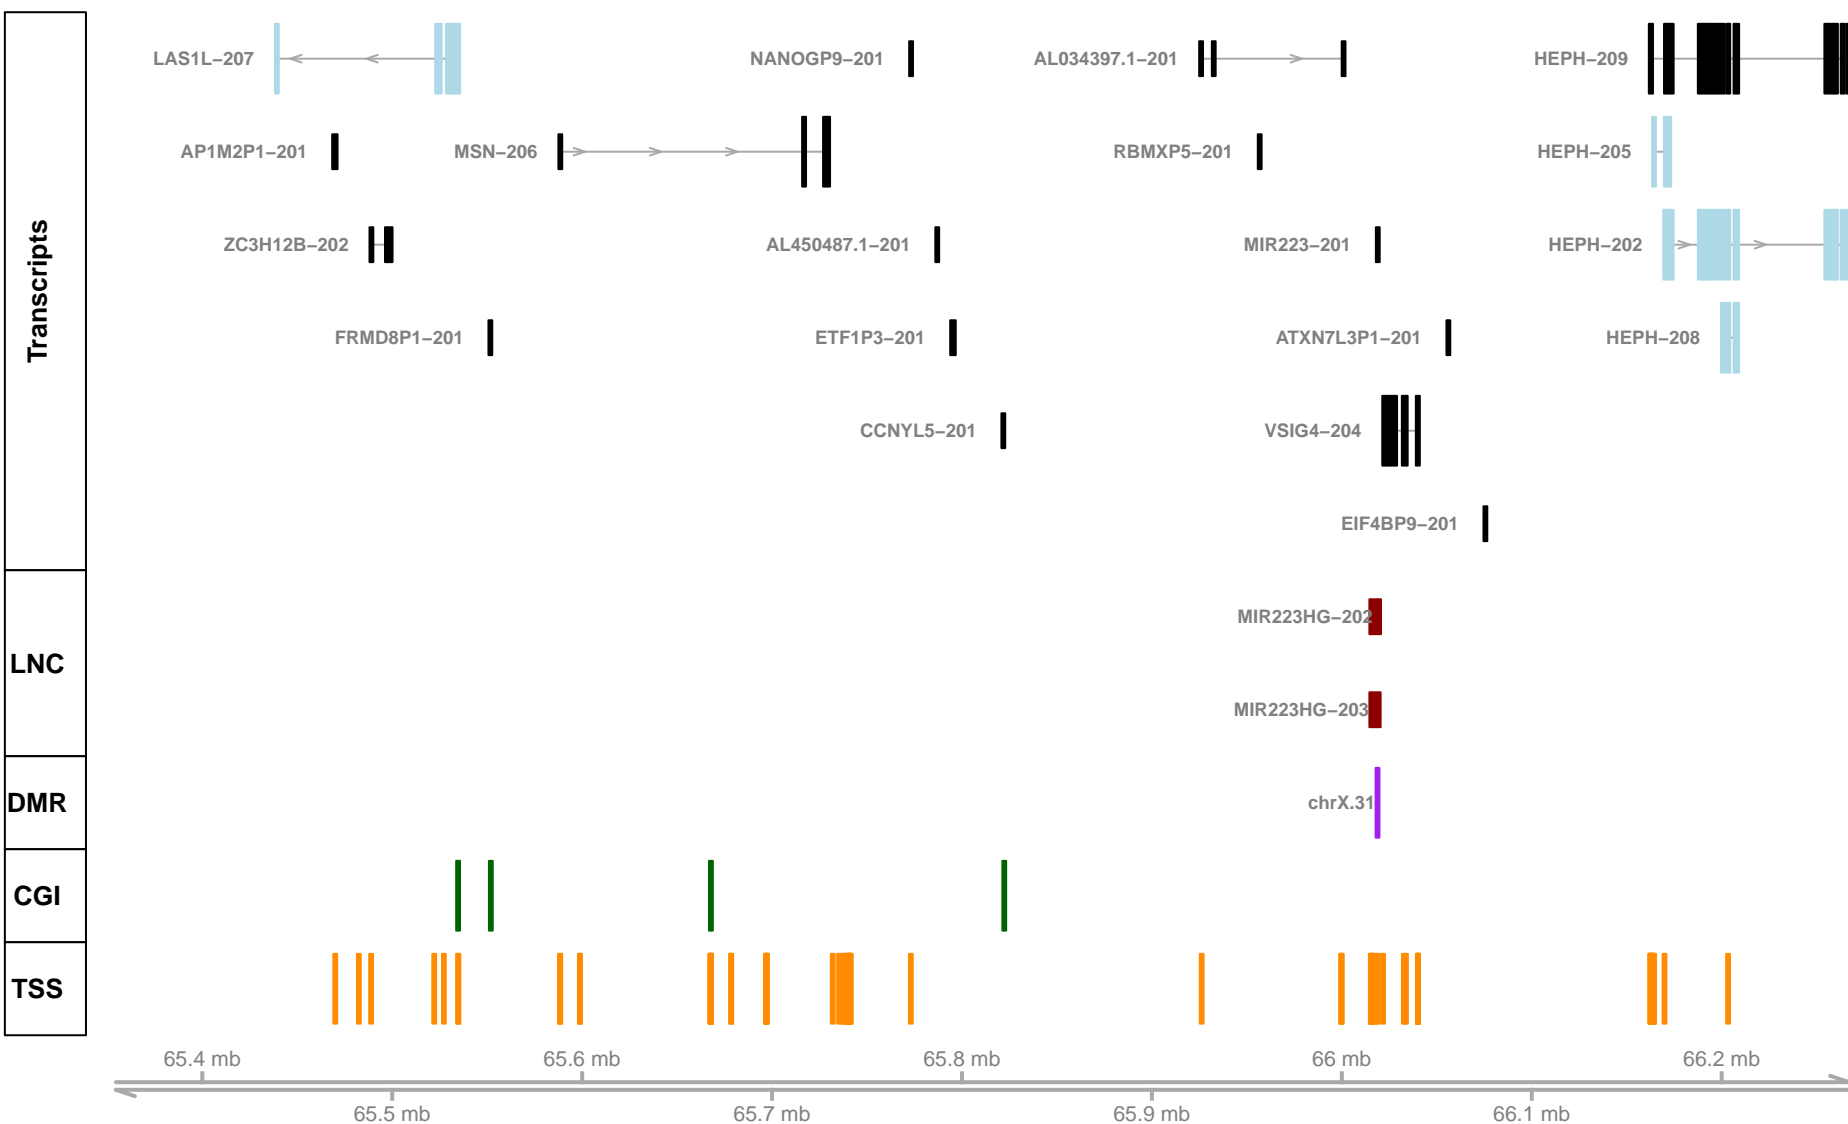

chrX.31

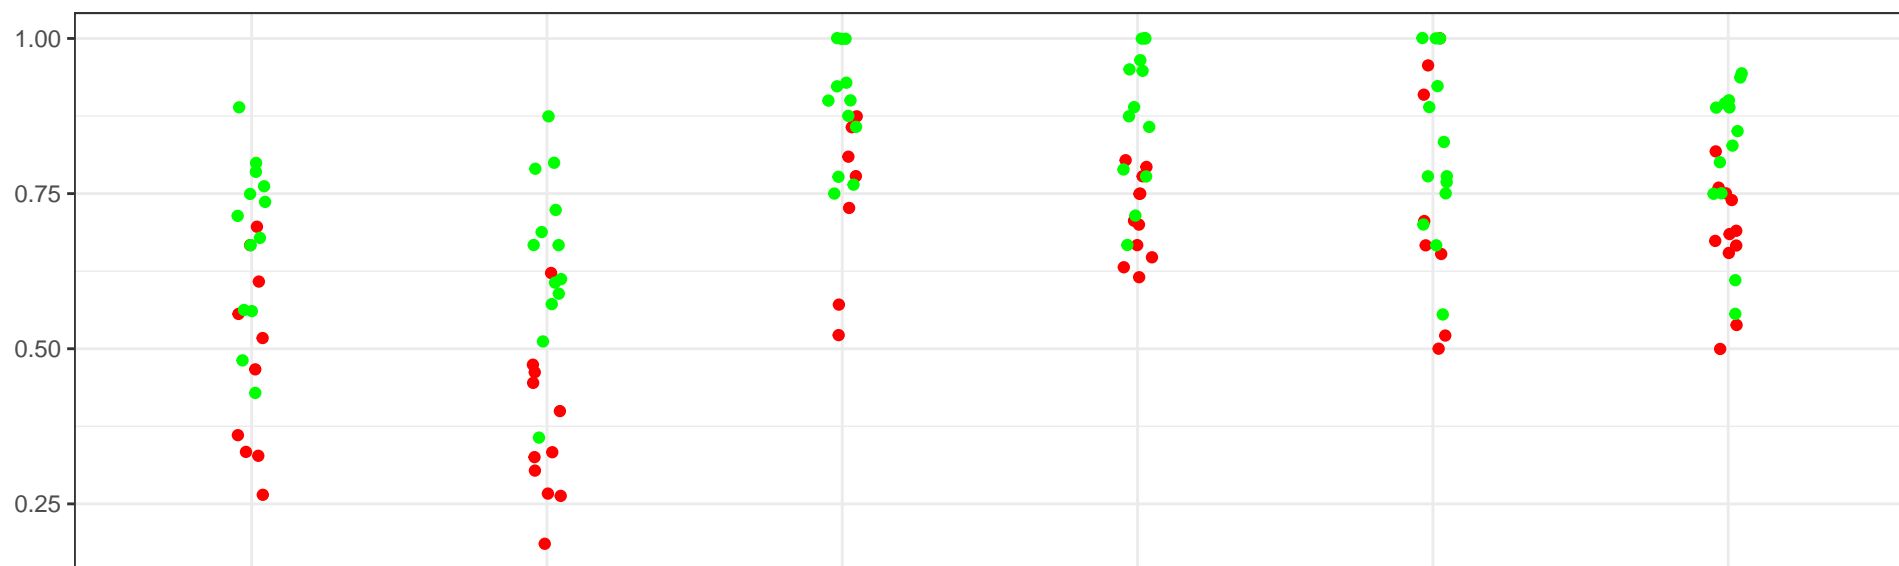

MIR3142HG

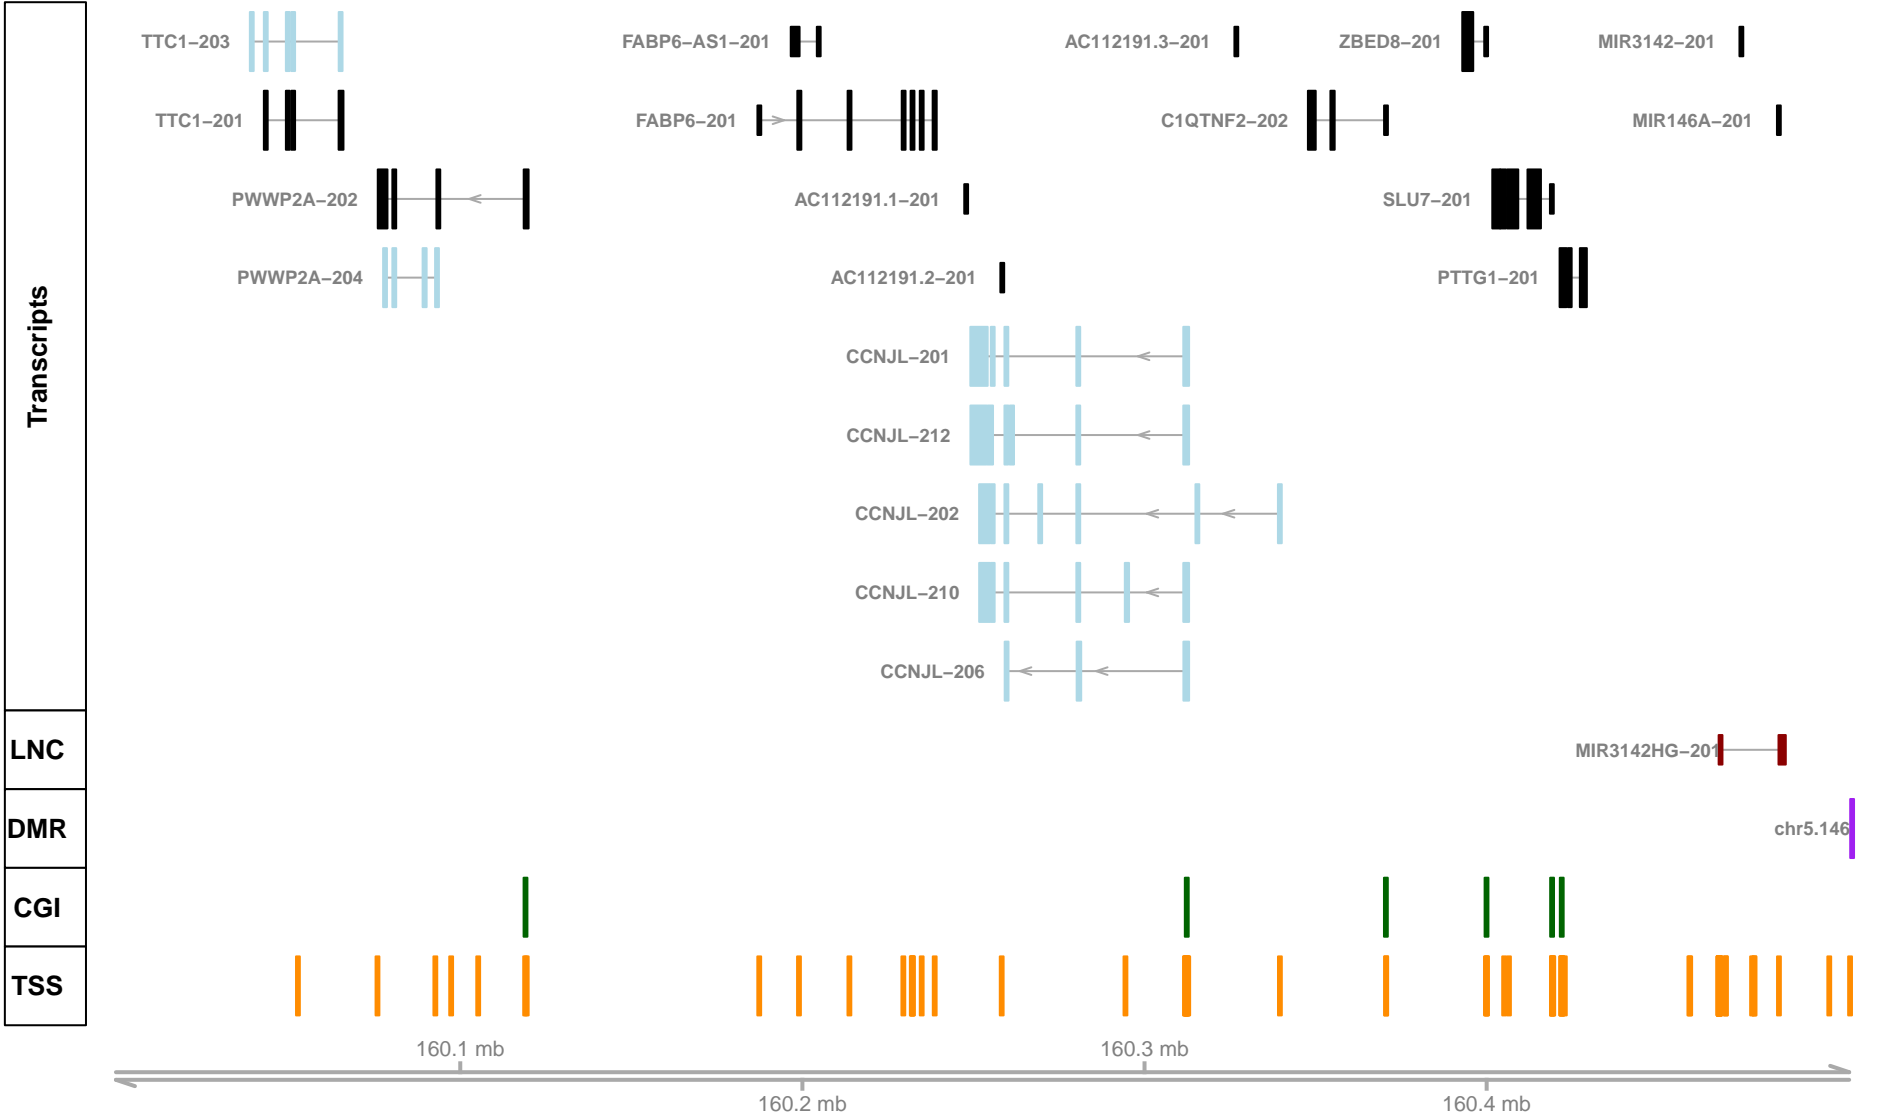

chr5.146

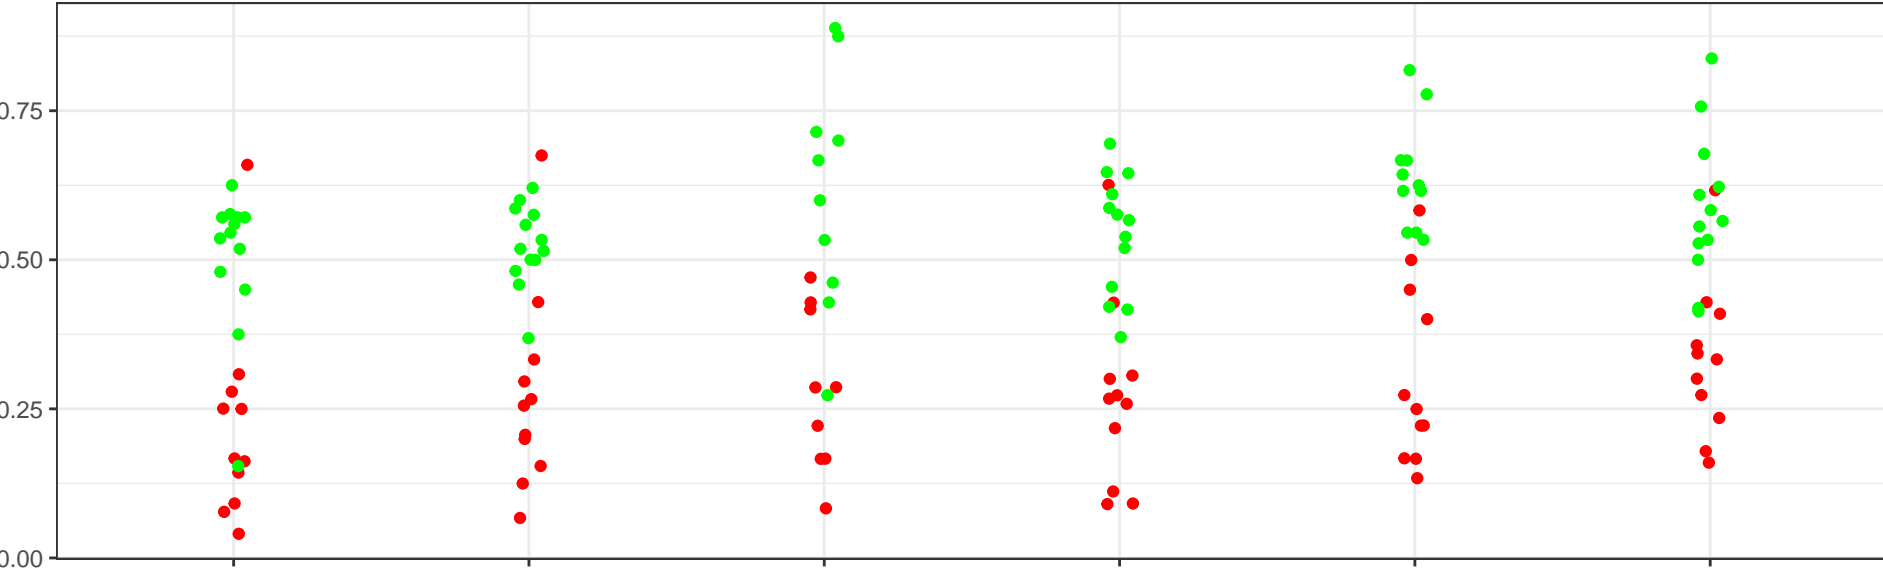

MIR3936HG

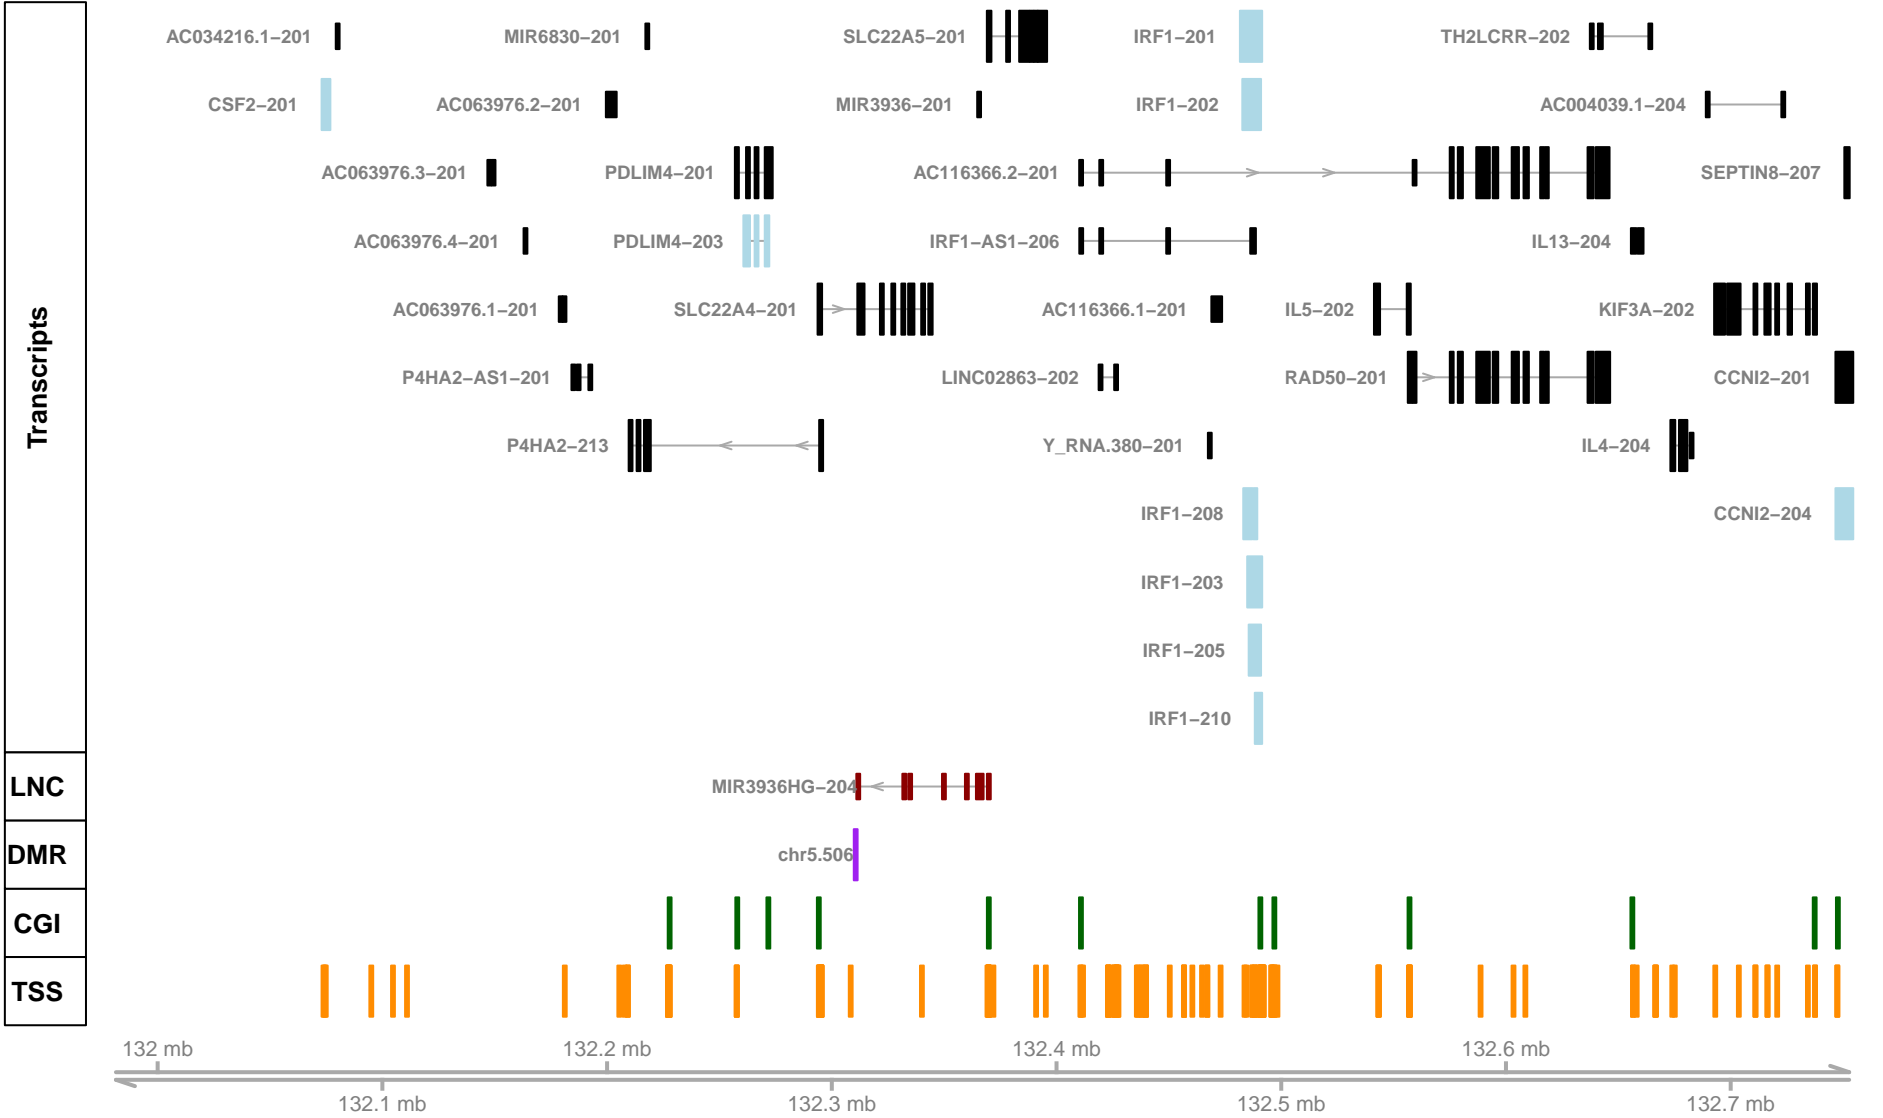

chr5.506

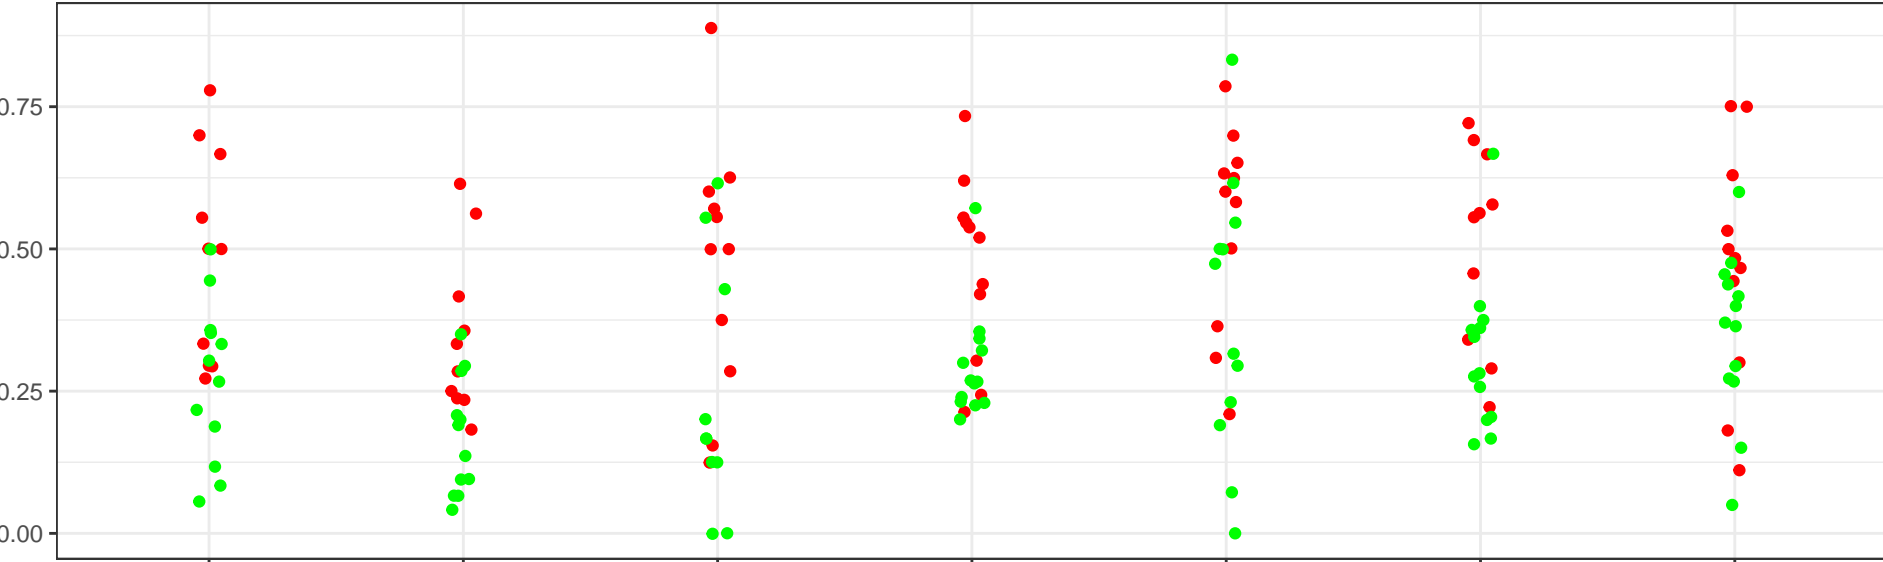

# MIR4435-2HG

Transcripts

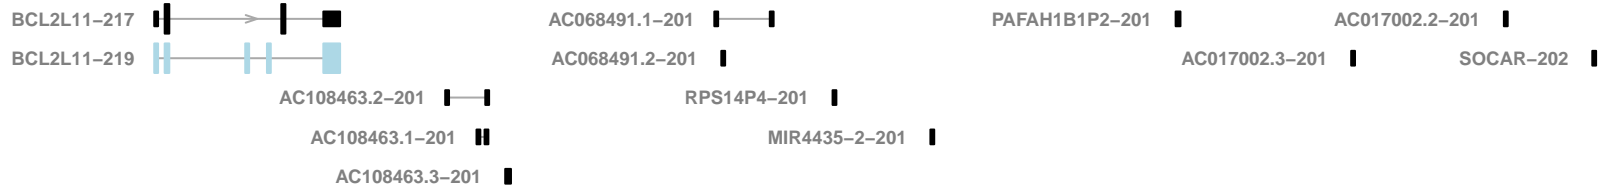

LNC

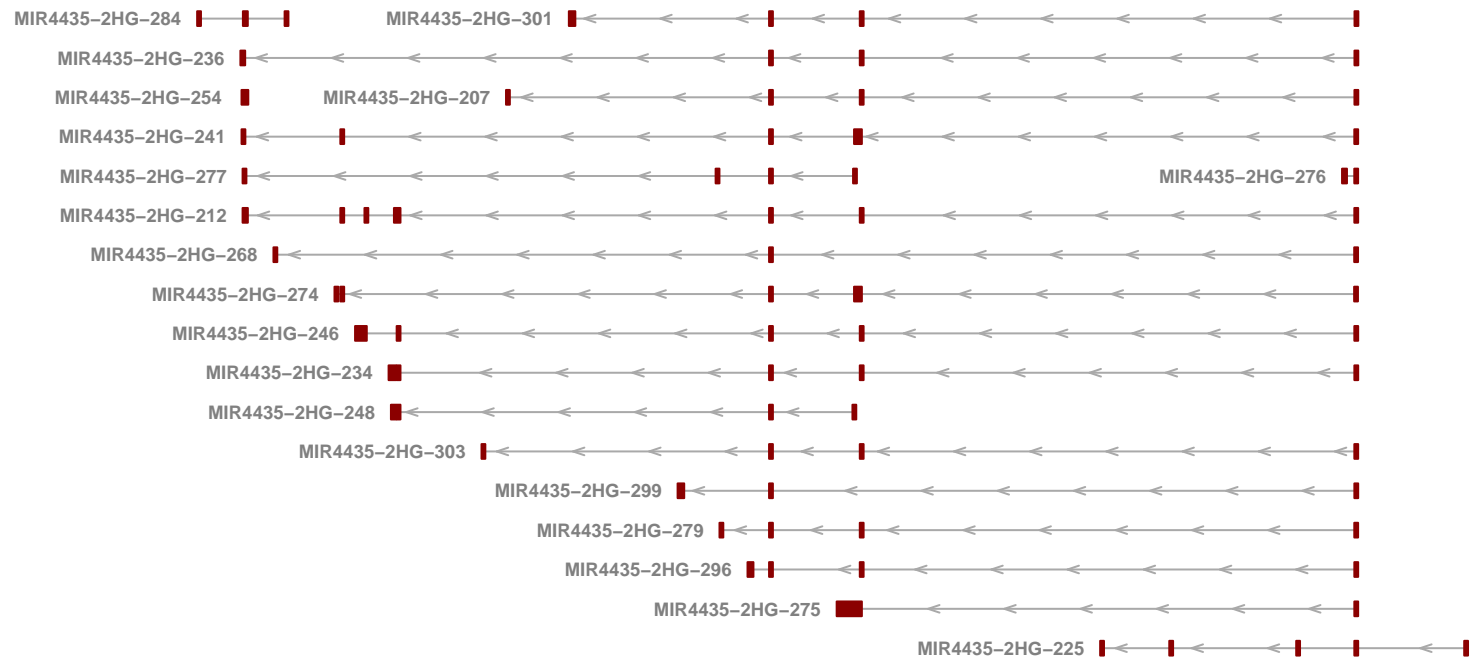

DMR

CGI

TSS

chr2.567

chr2.545

chr2.399

111.1 mb

111.2 mb

111.3 mb

111.4 mb

111.5 mb

chr2.399

chr2.567

chr2.545

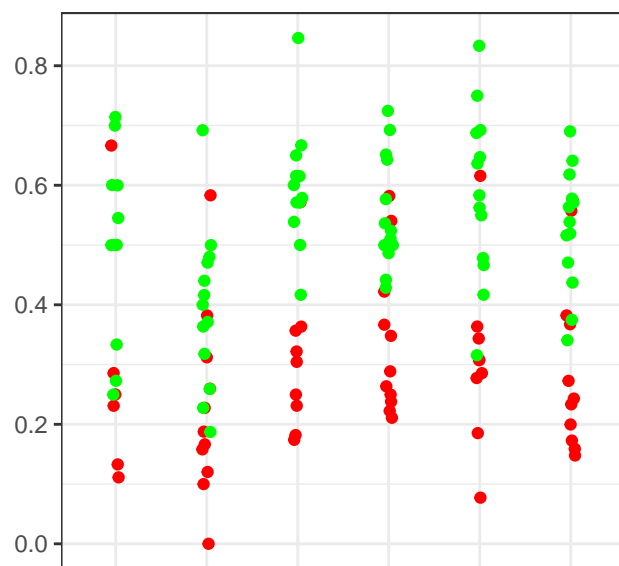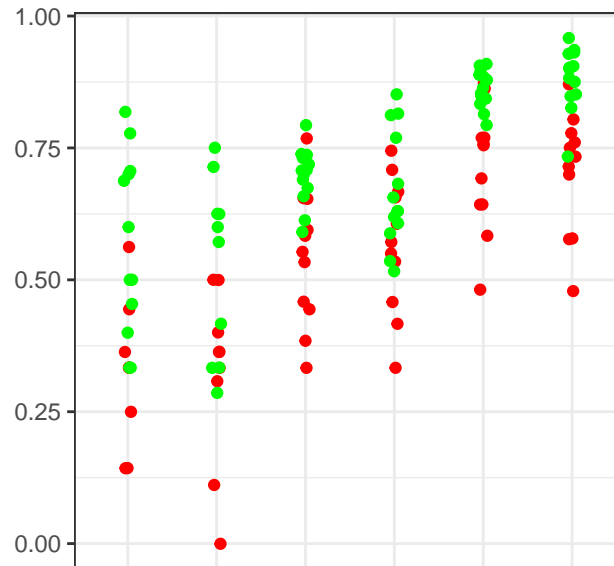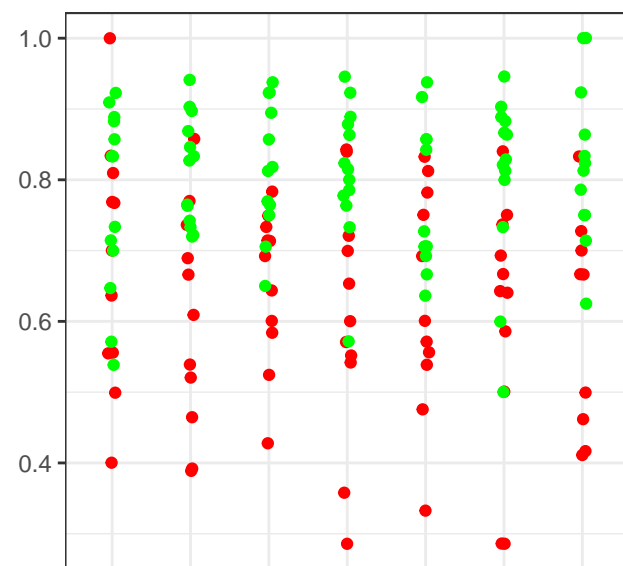

# NEAT1

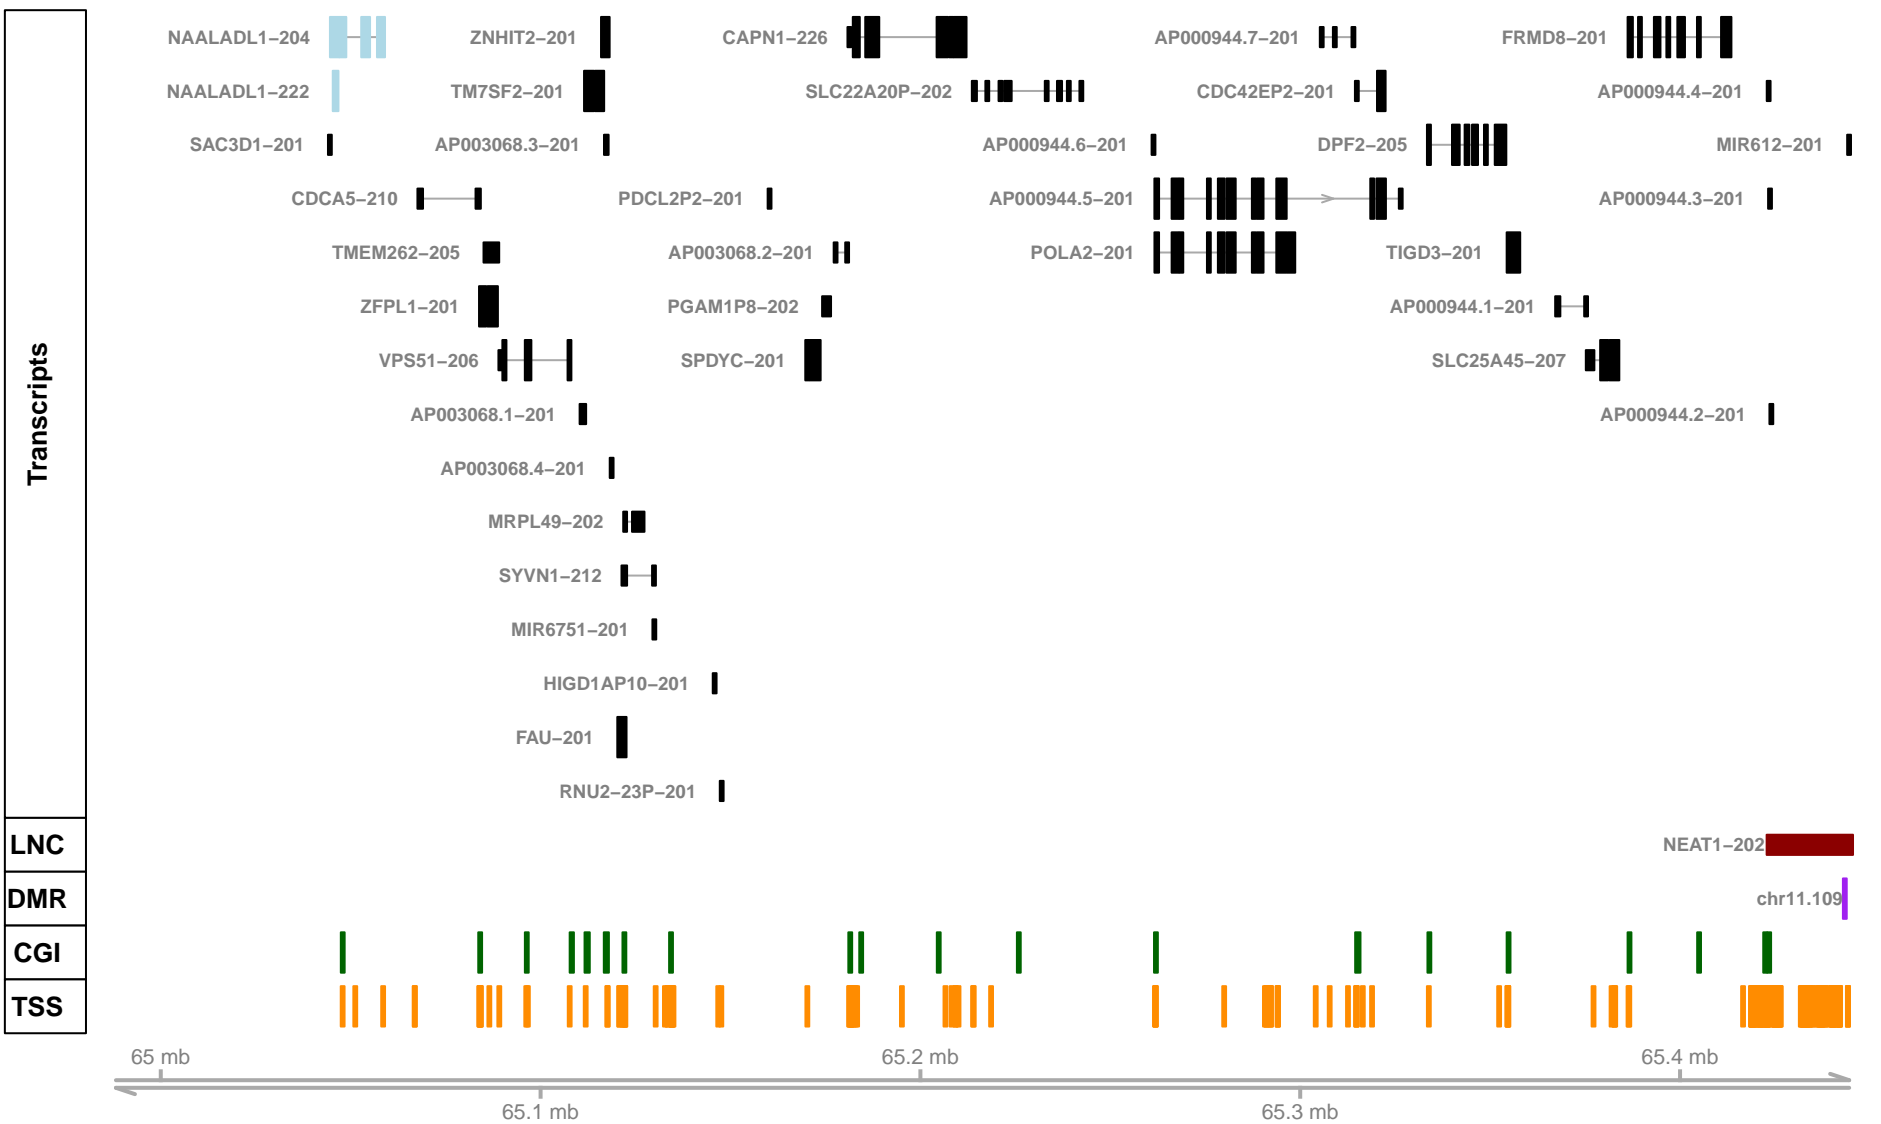

## chr11.109

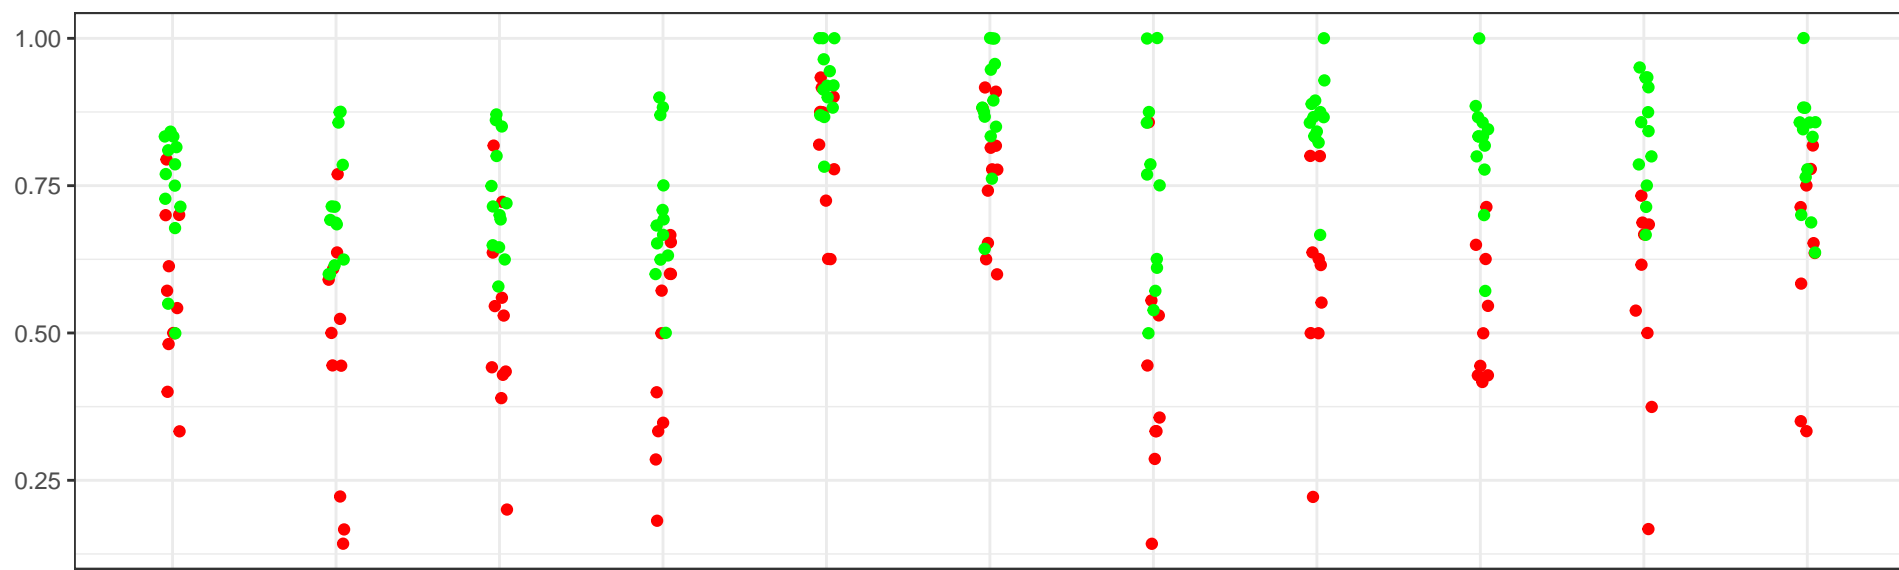

# NECTIN4-AS1

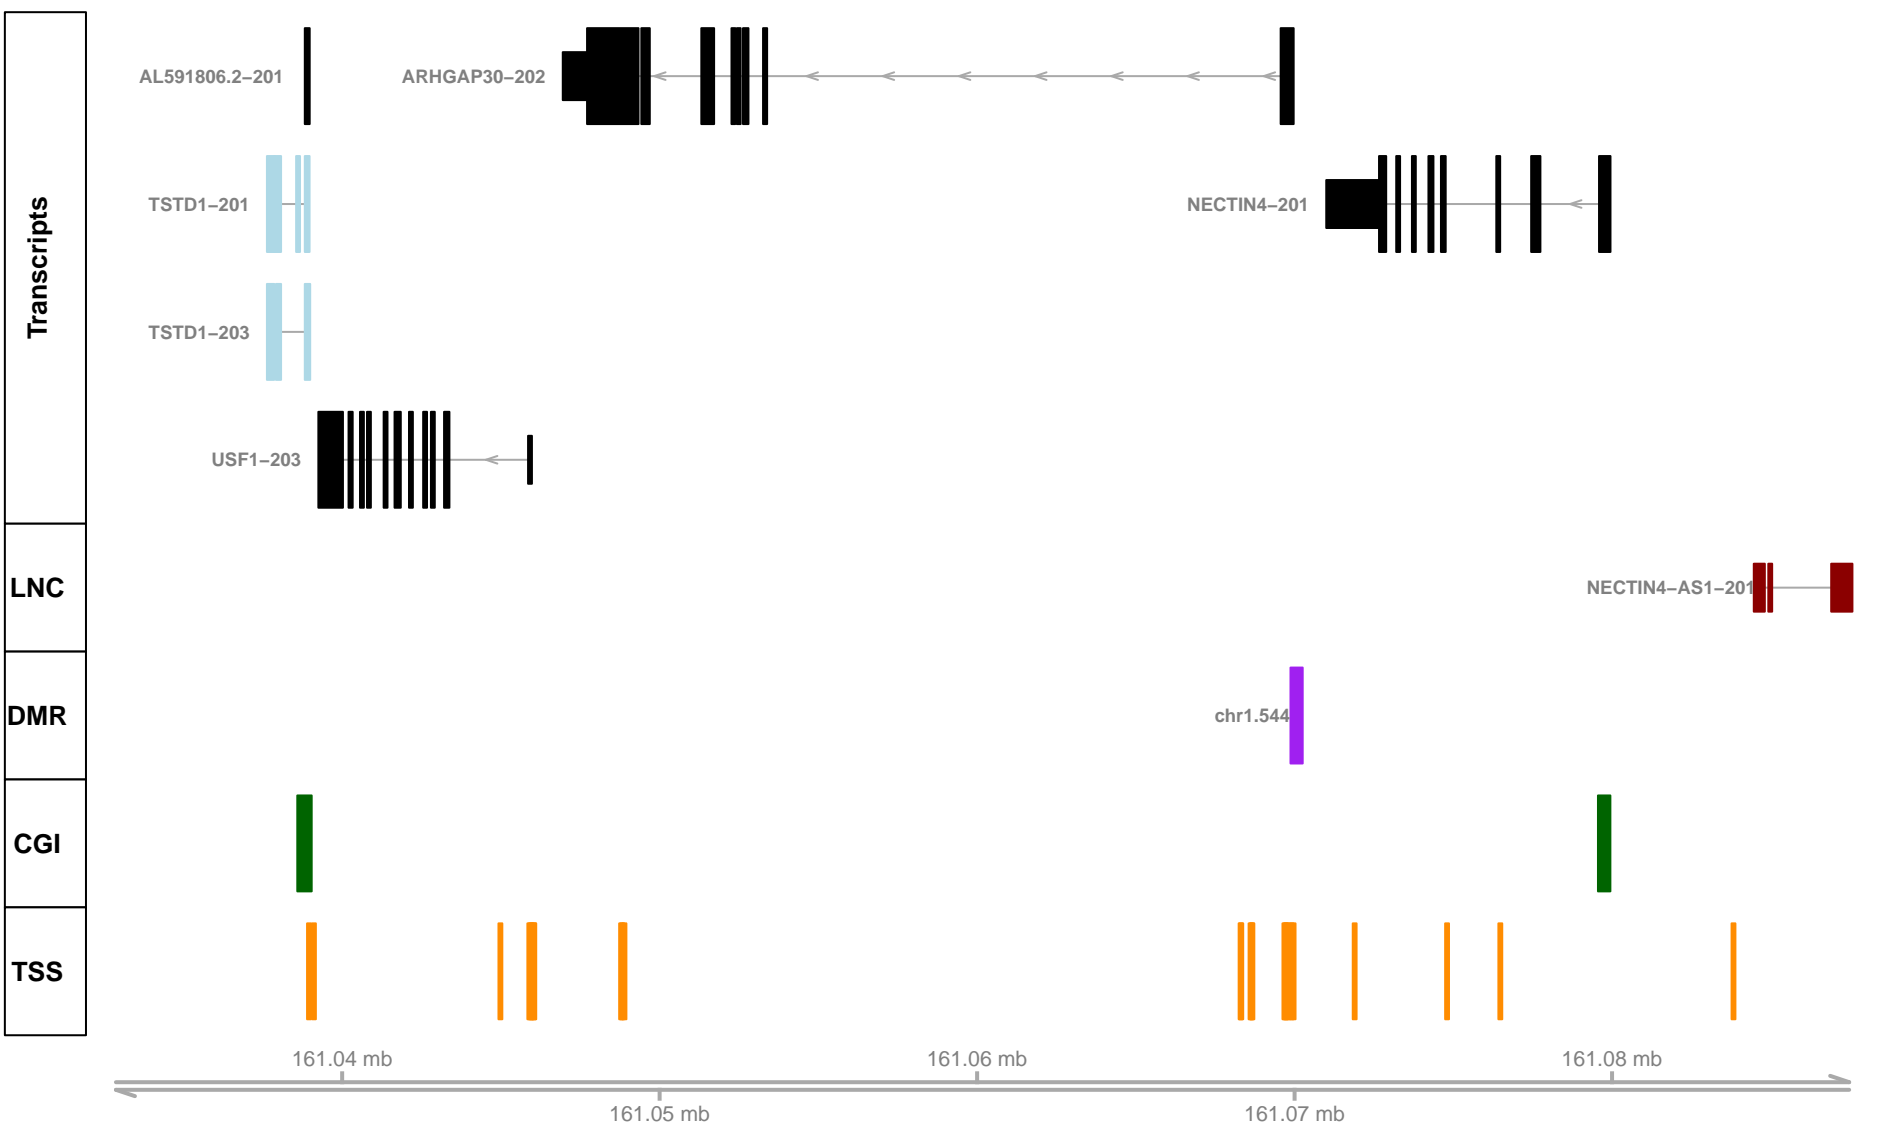

## chr1.544

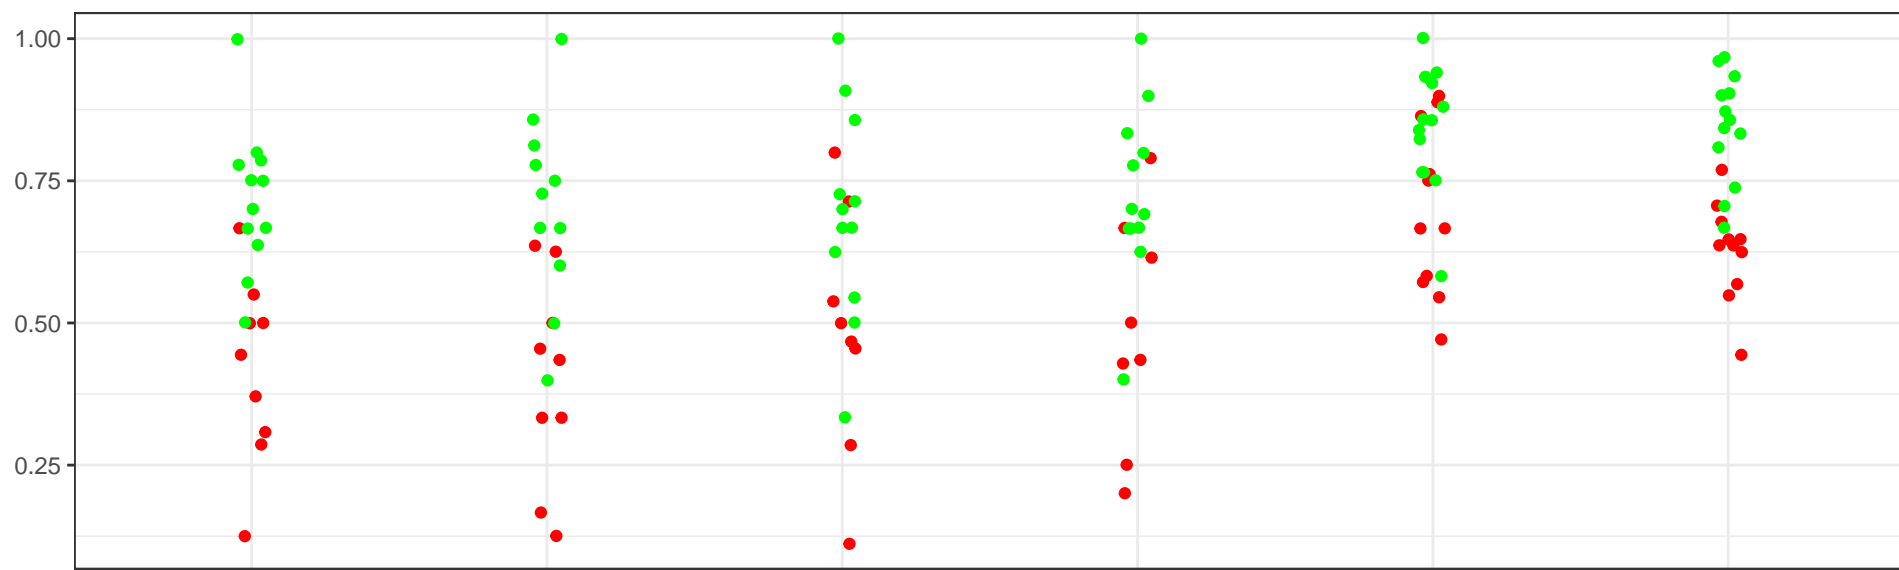

OVOL1-AS1

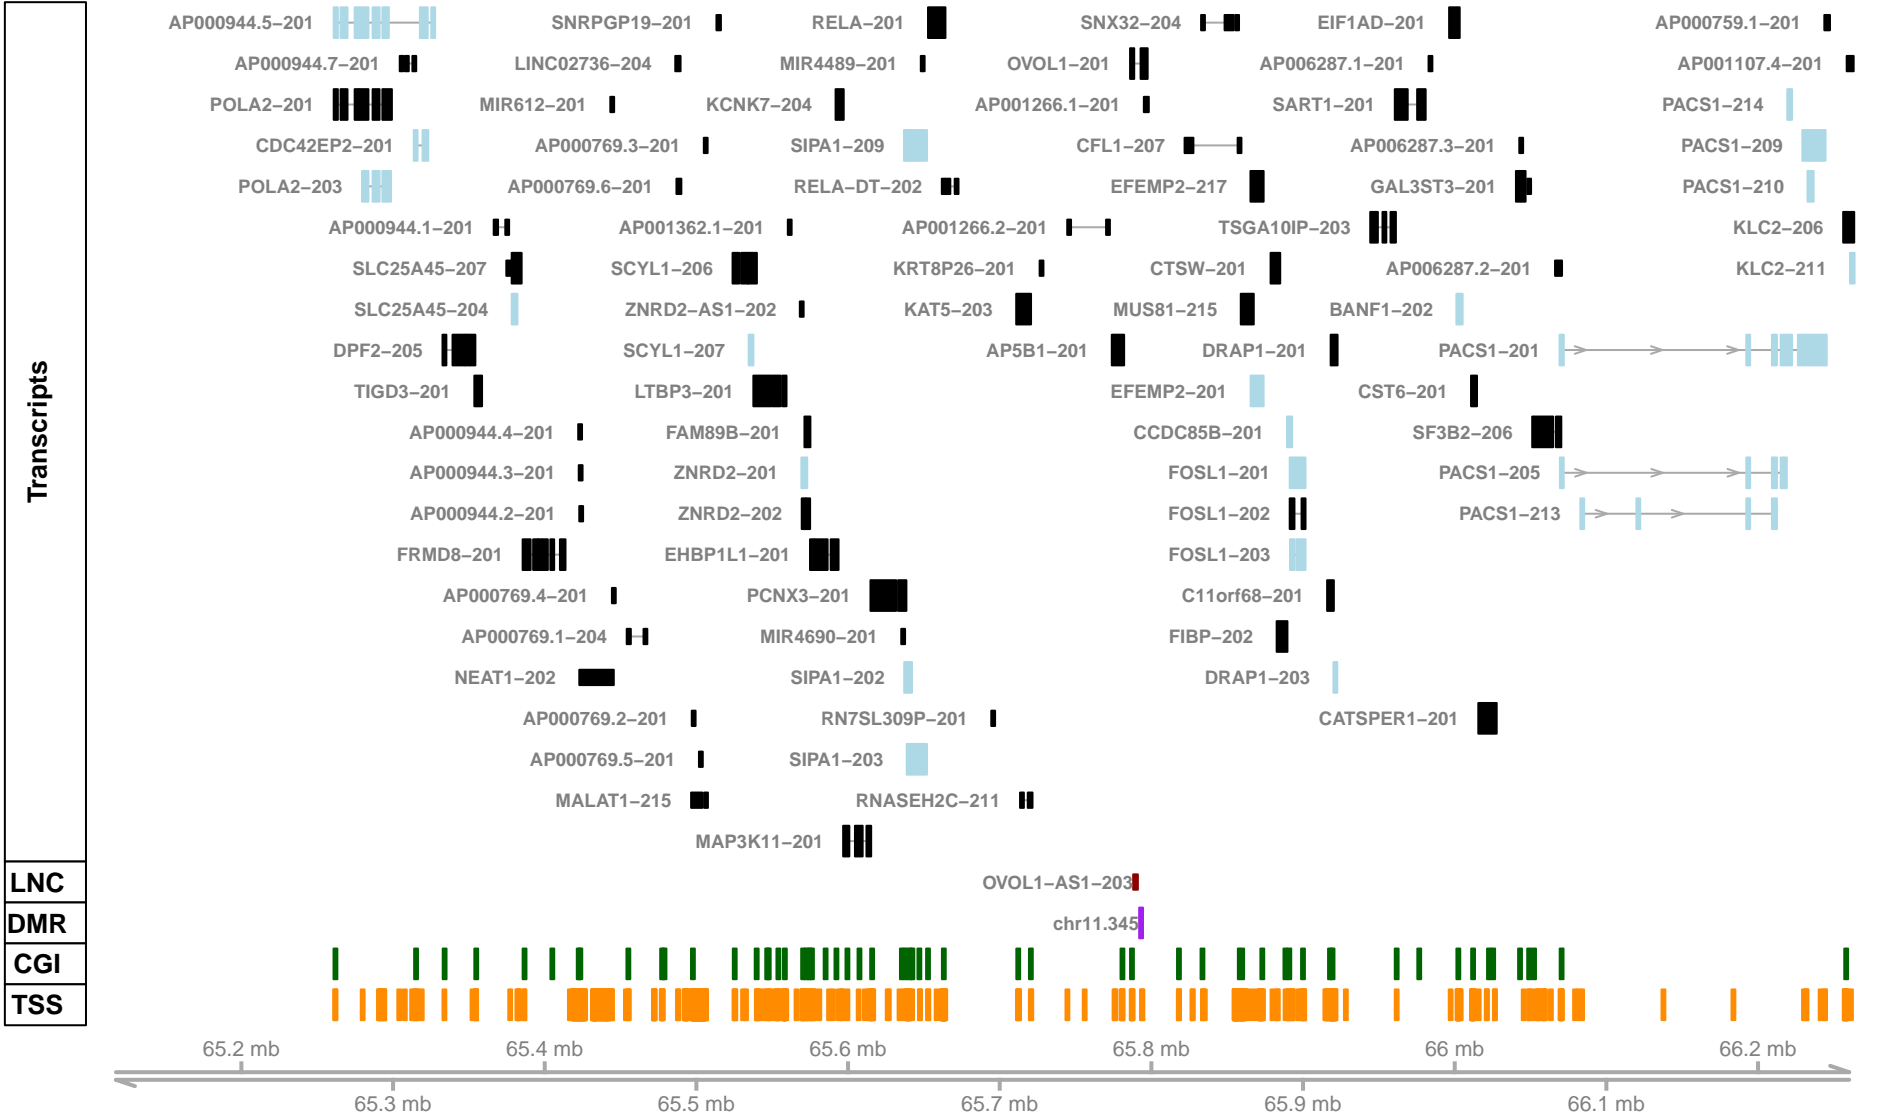

chr11.345

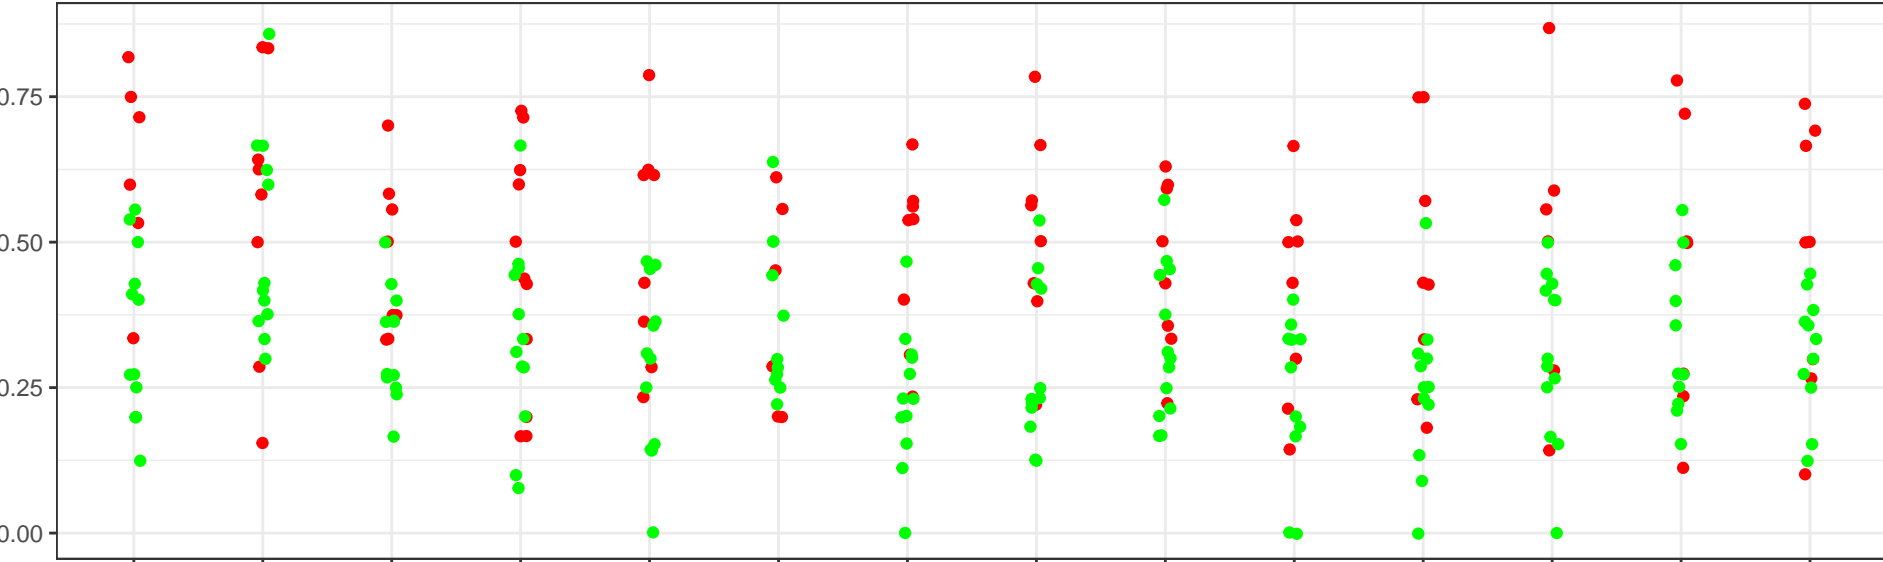

PCED1B-AS1

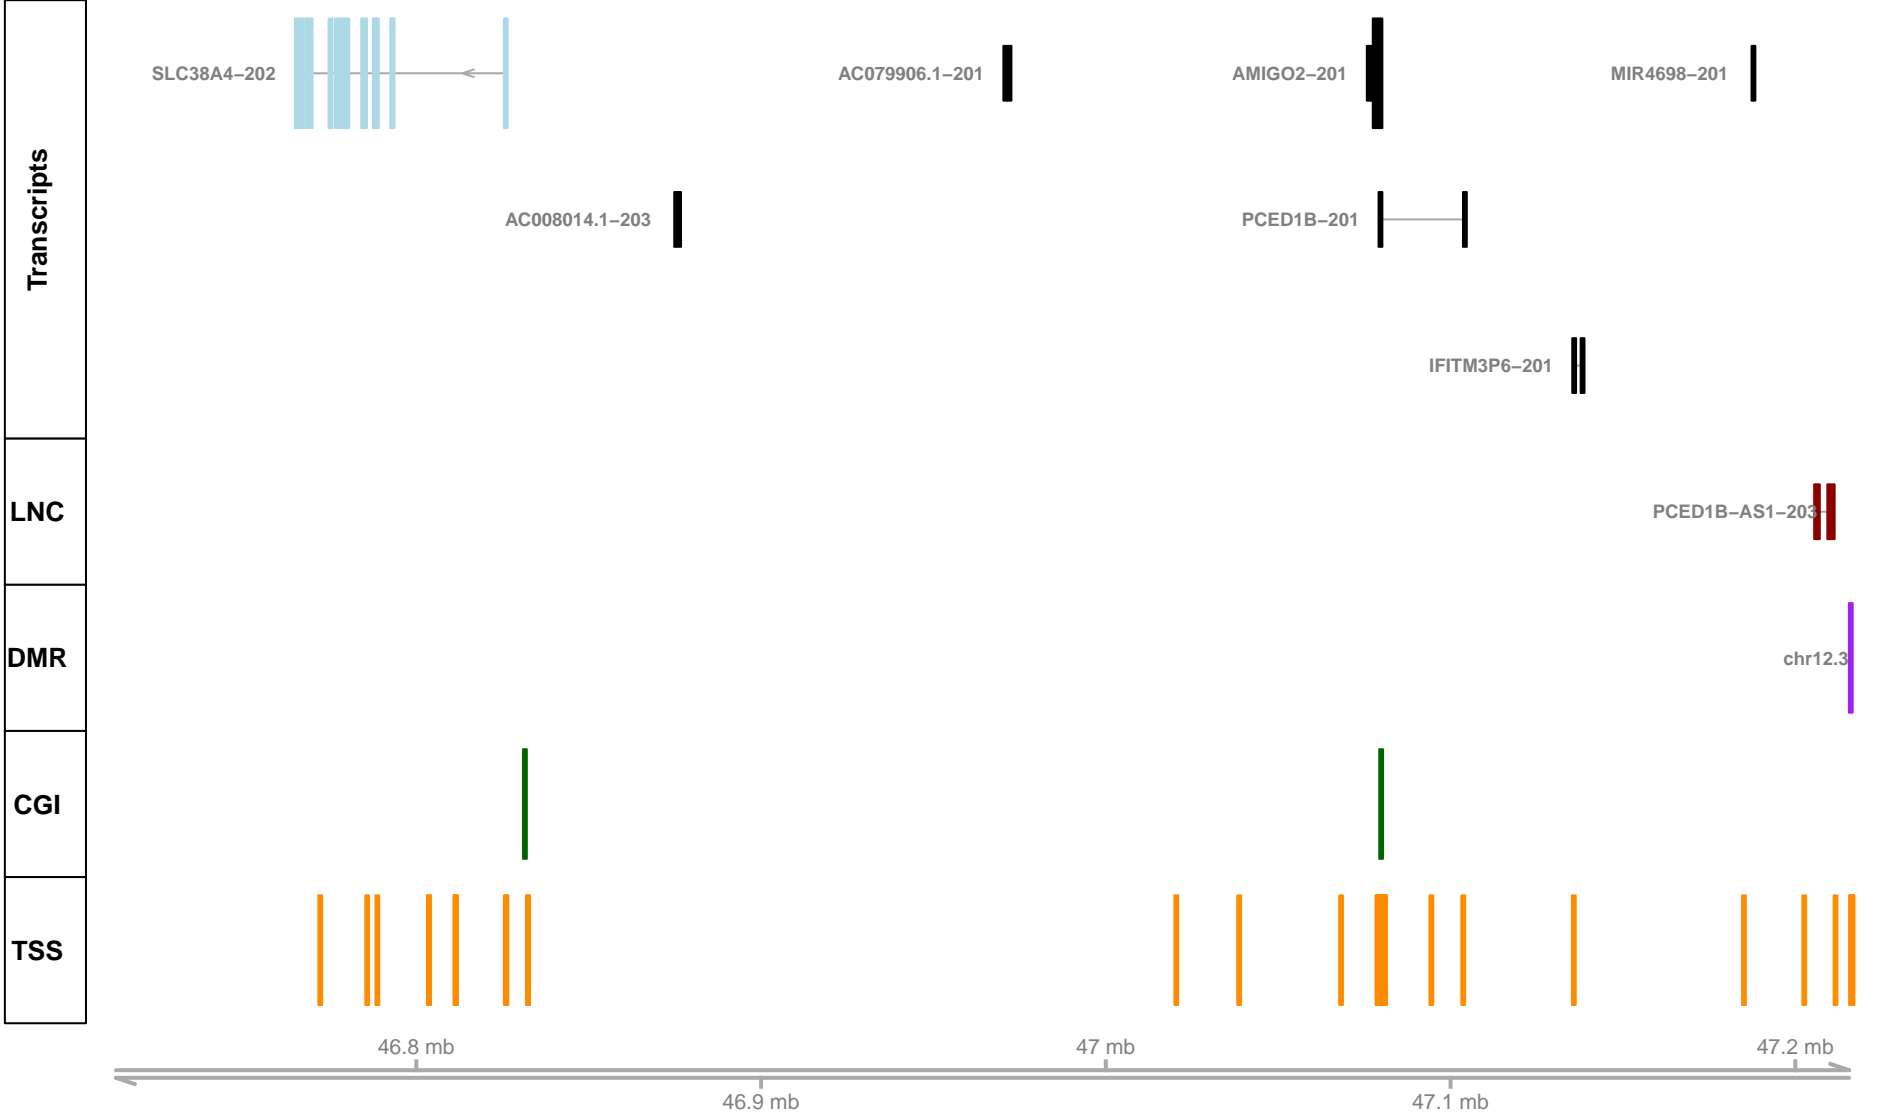

chr12.3

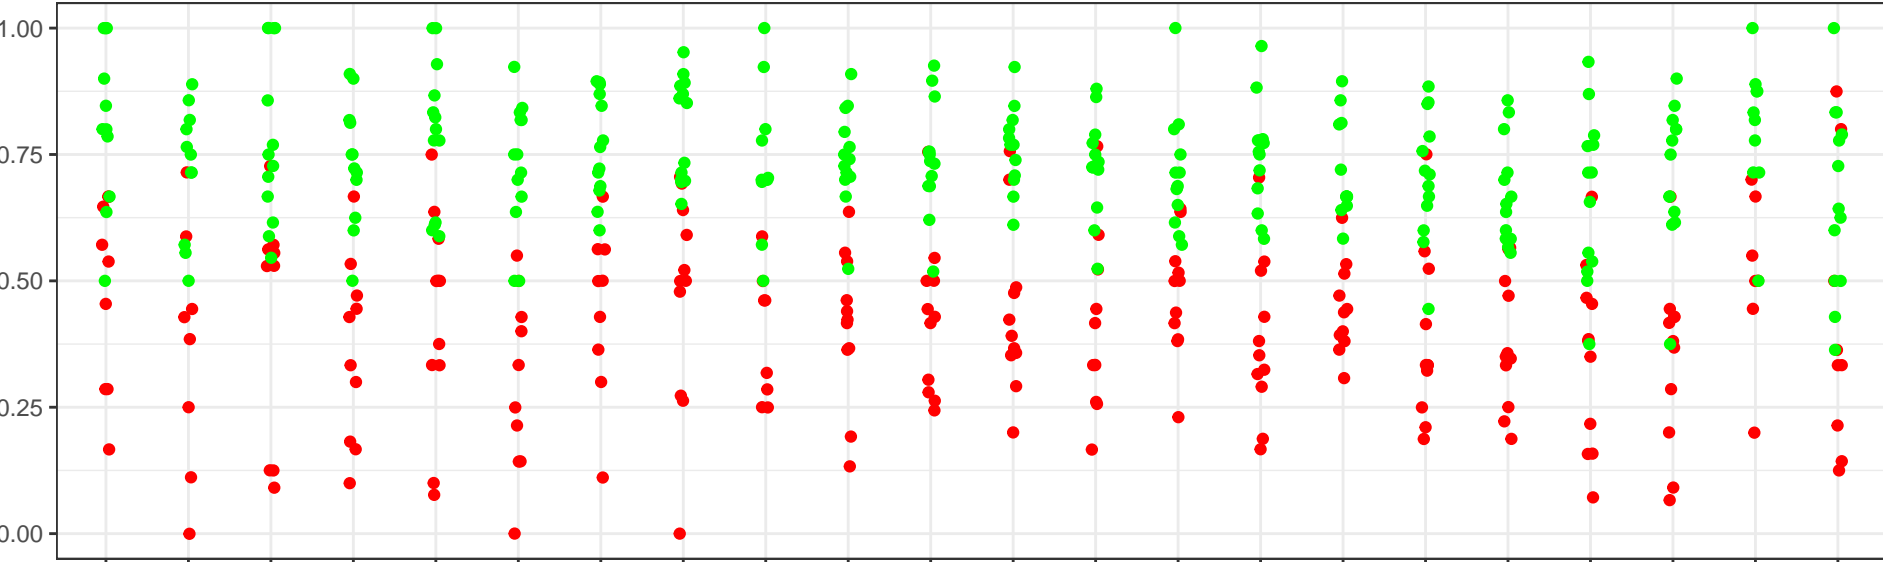

# PRKAR1B-AS1

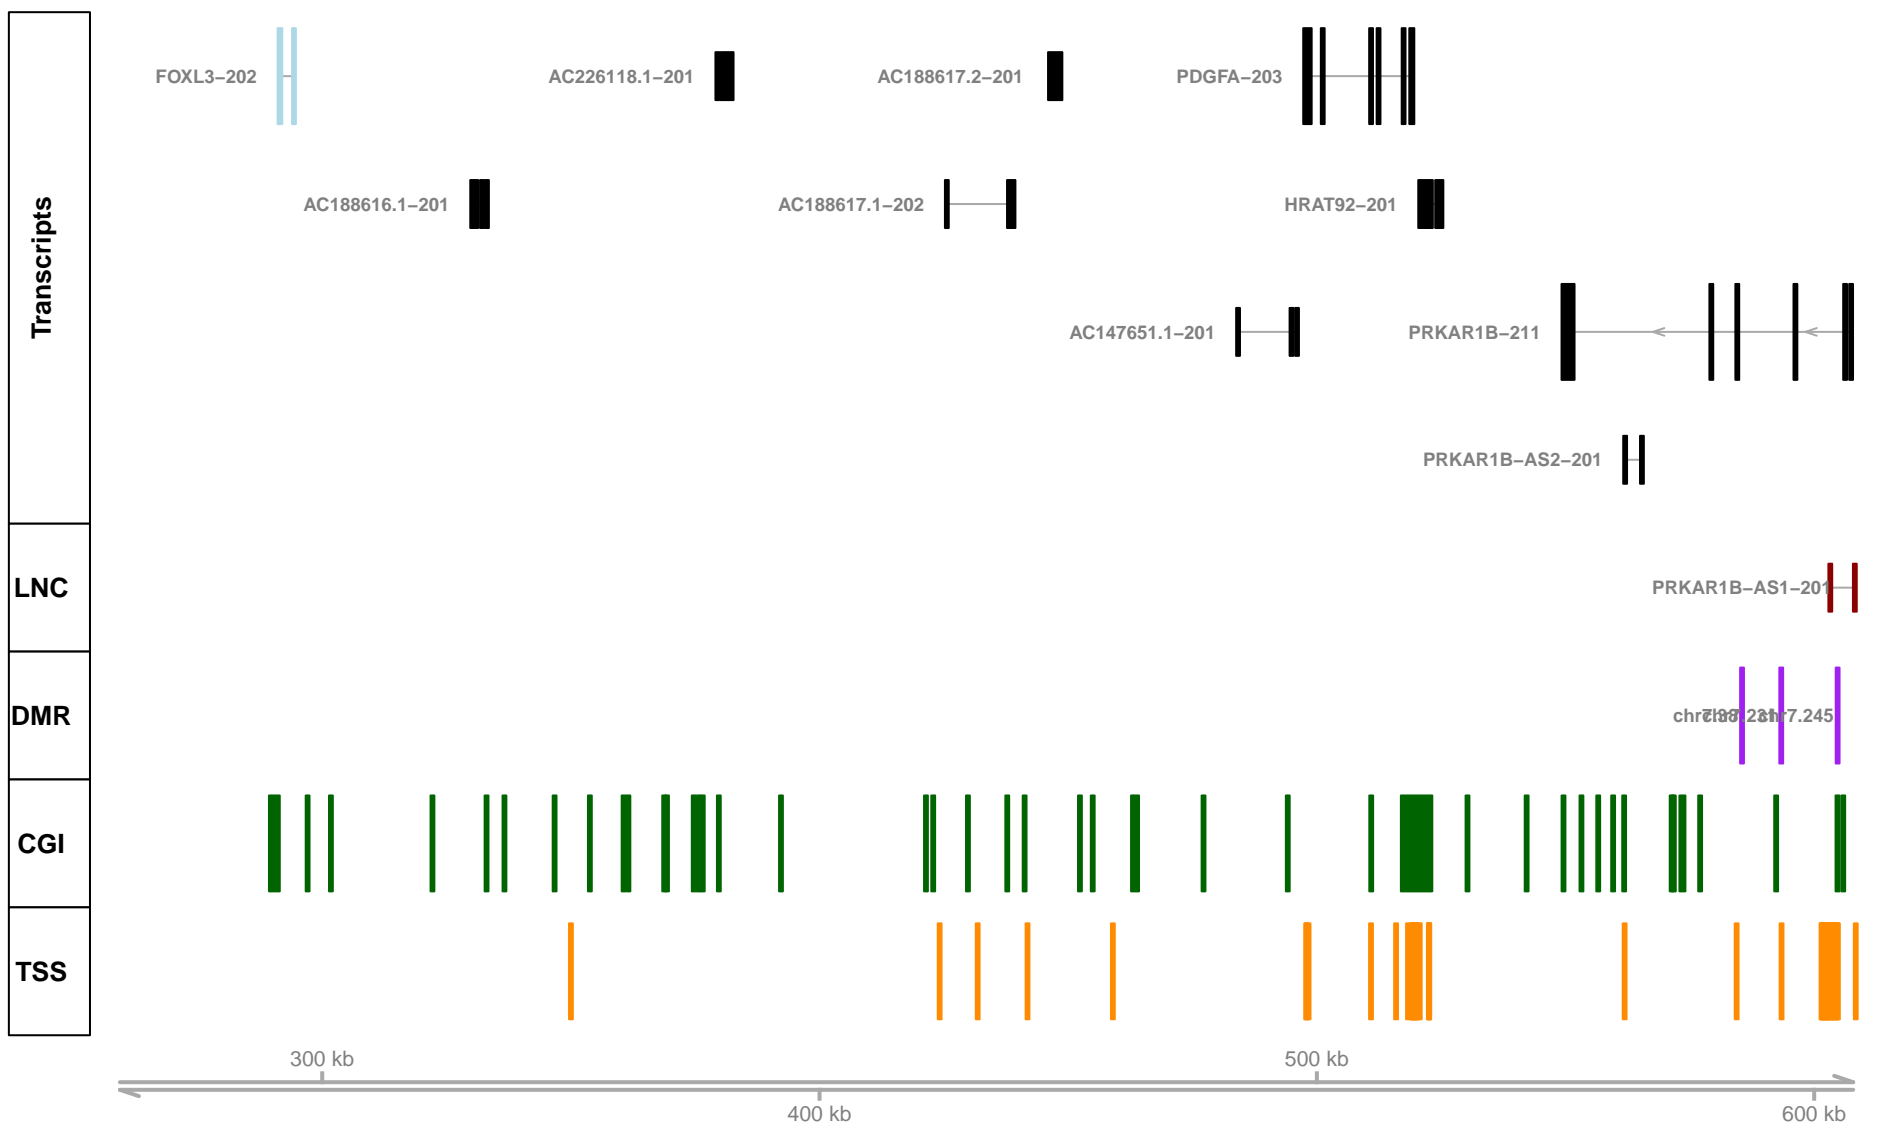

chr7.231

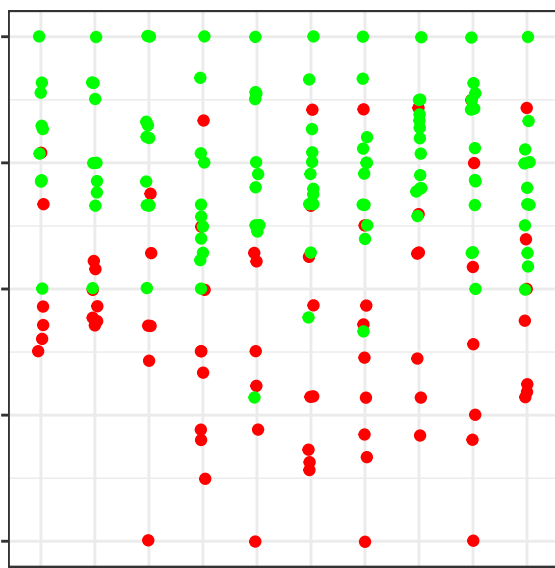

chr7.38

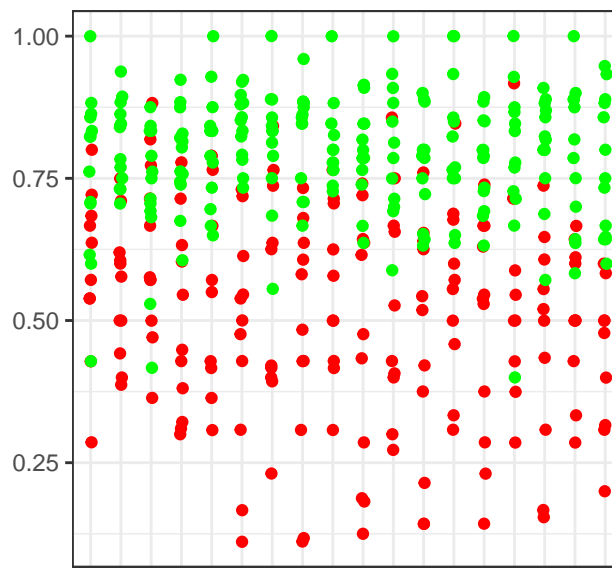

chr7.245

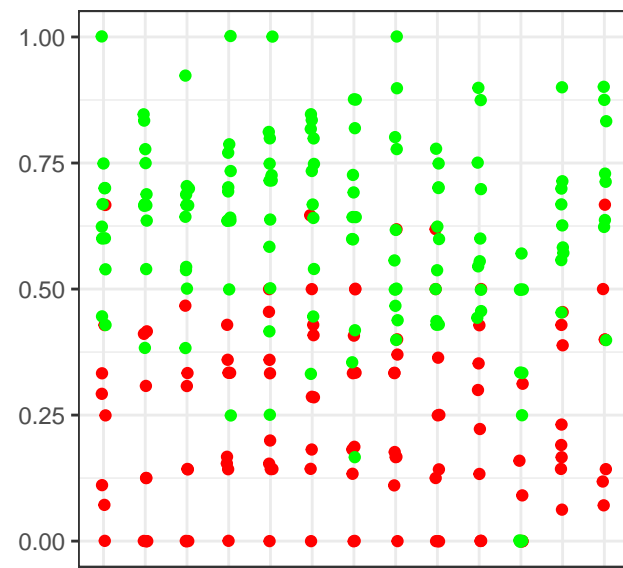

# PRR26

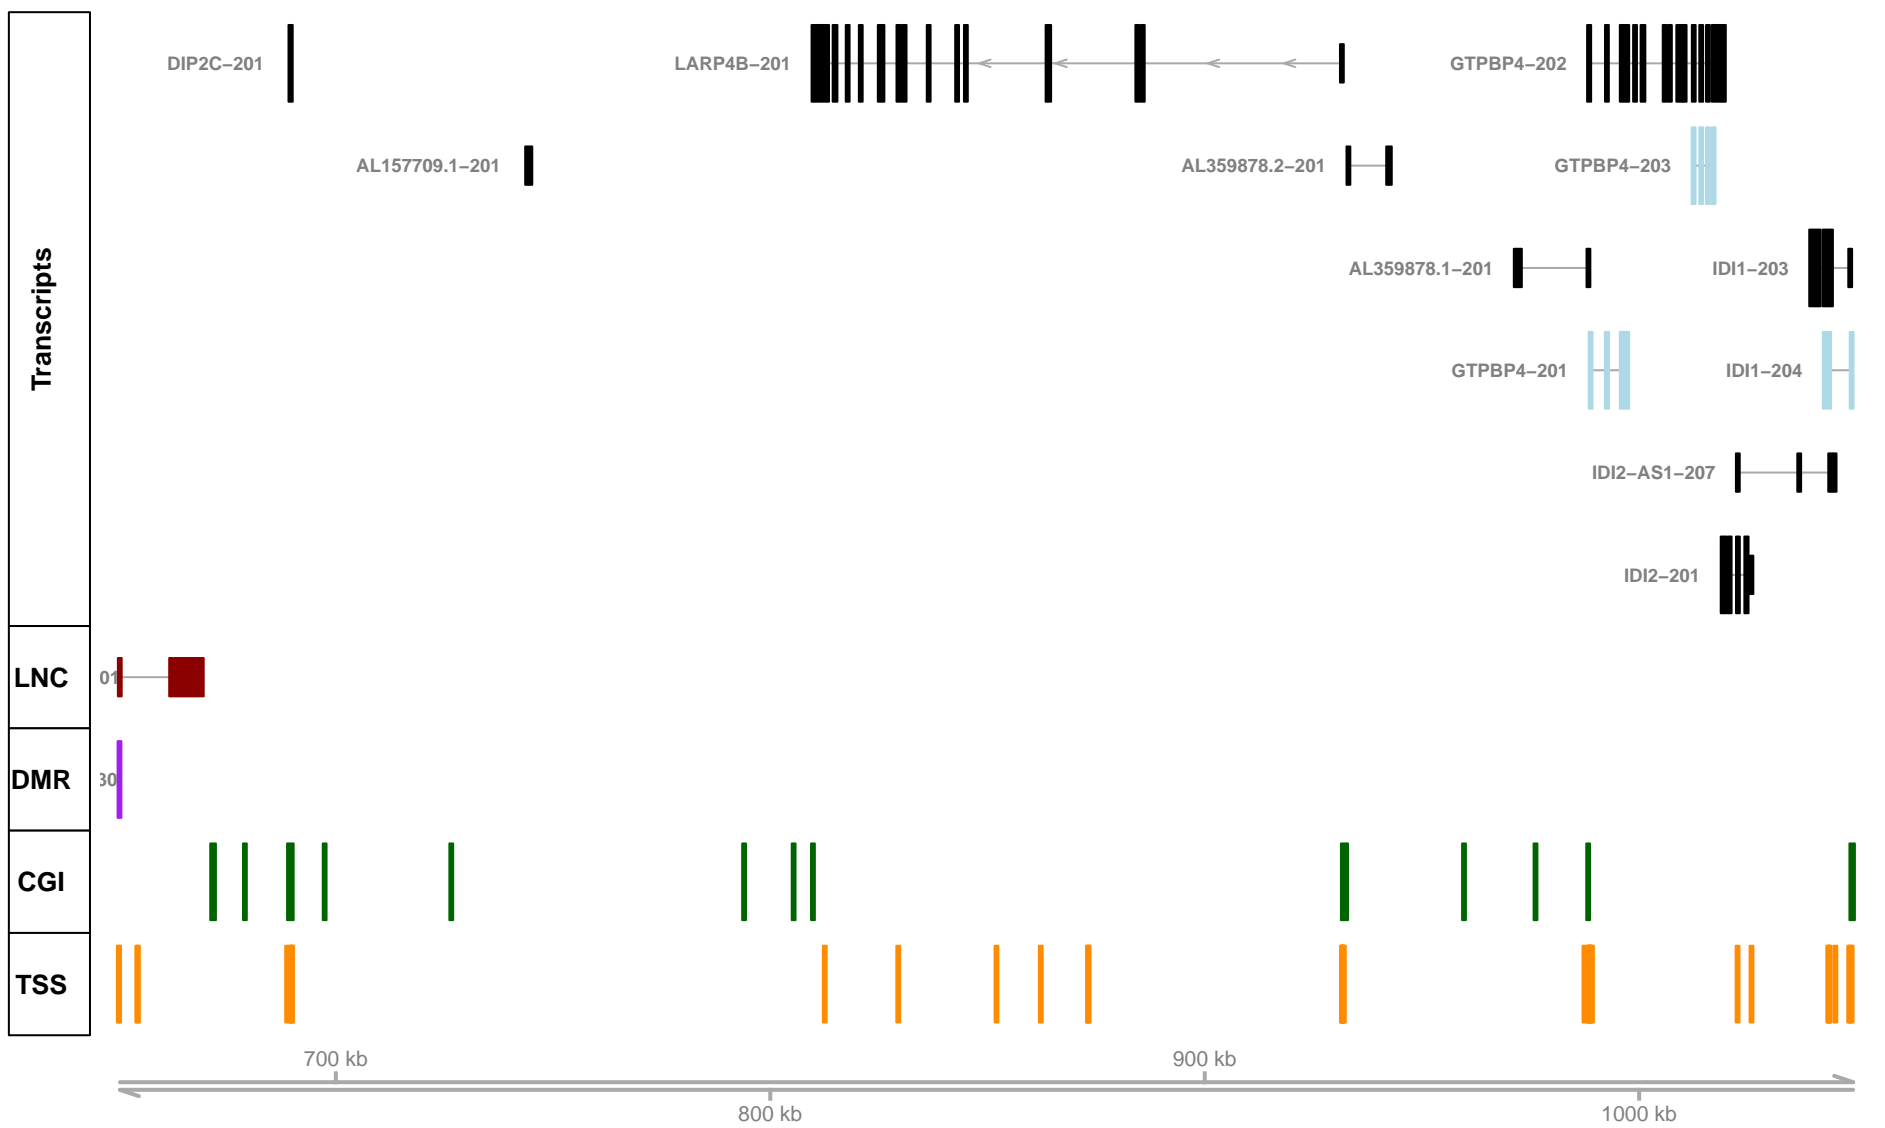

## chr10.30

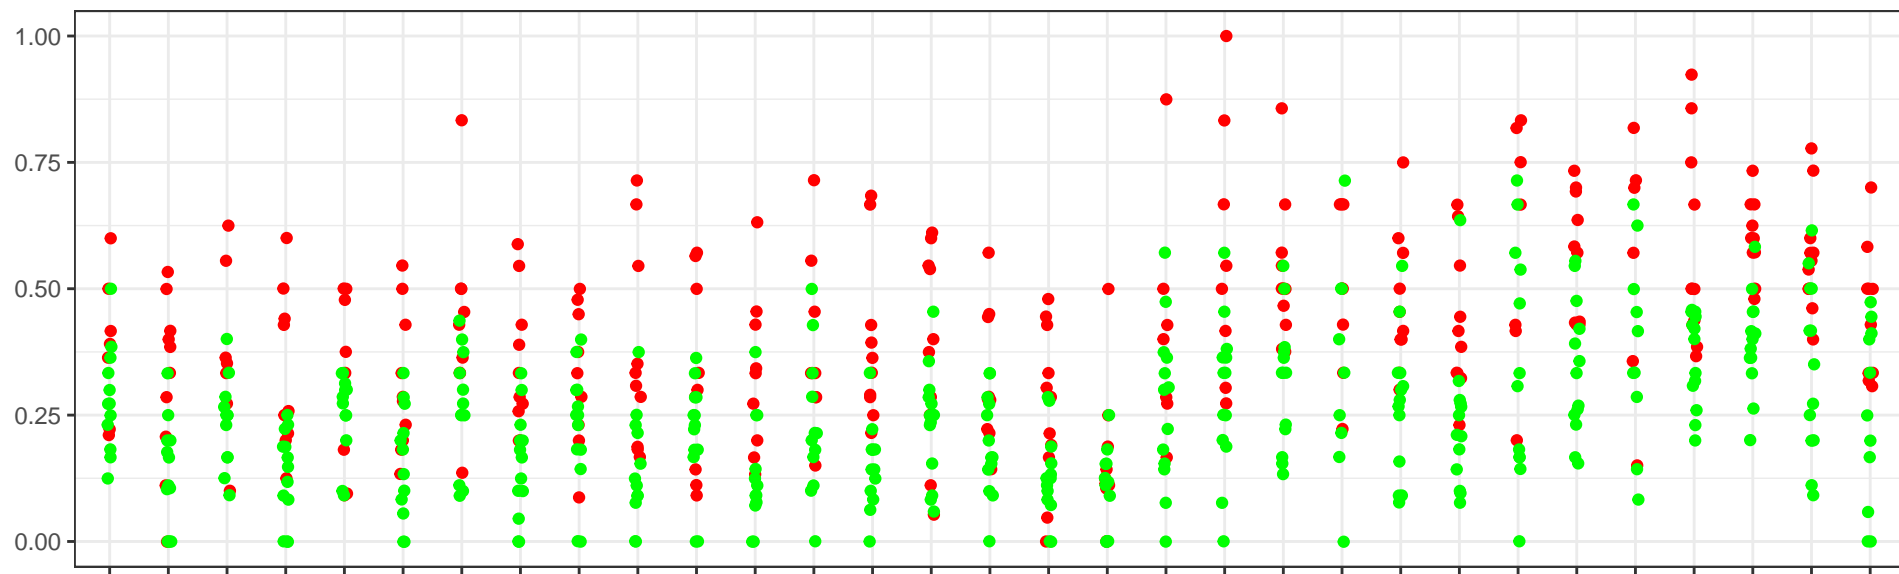

# PTCSC1

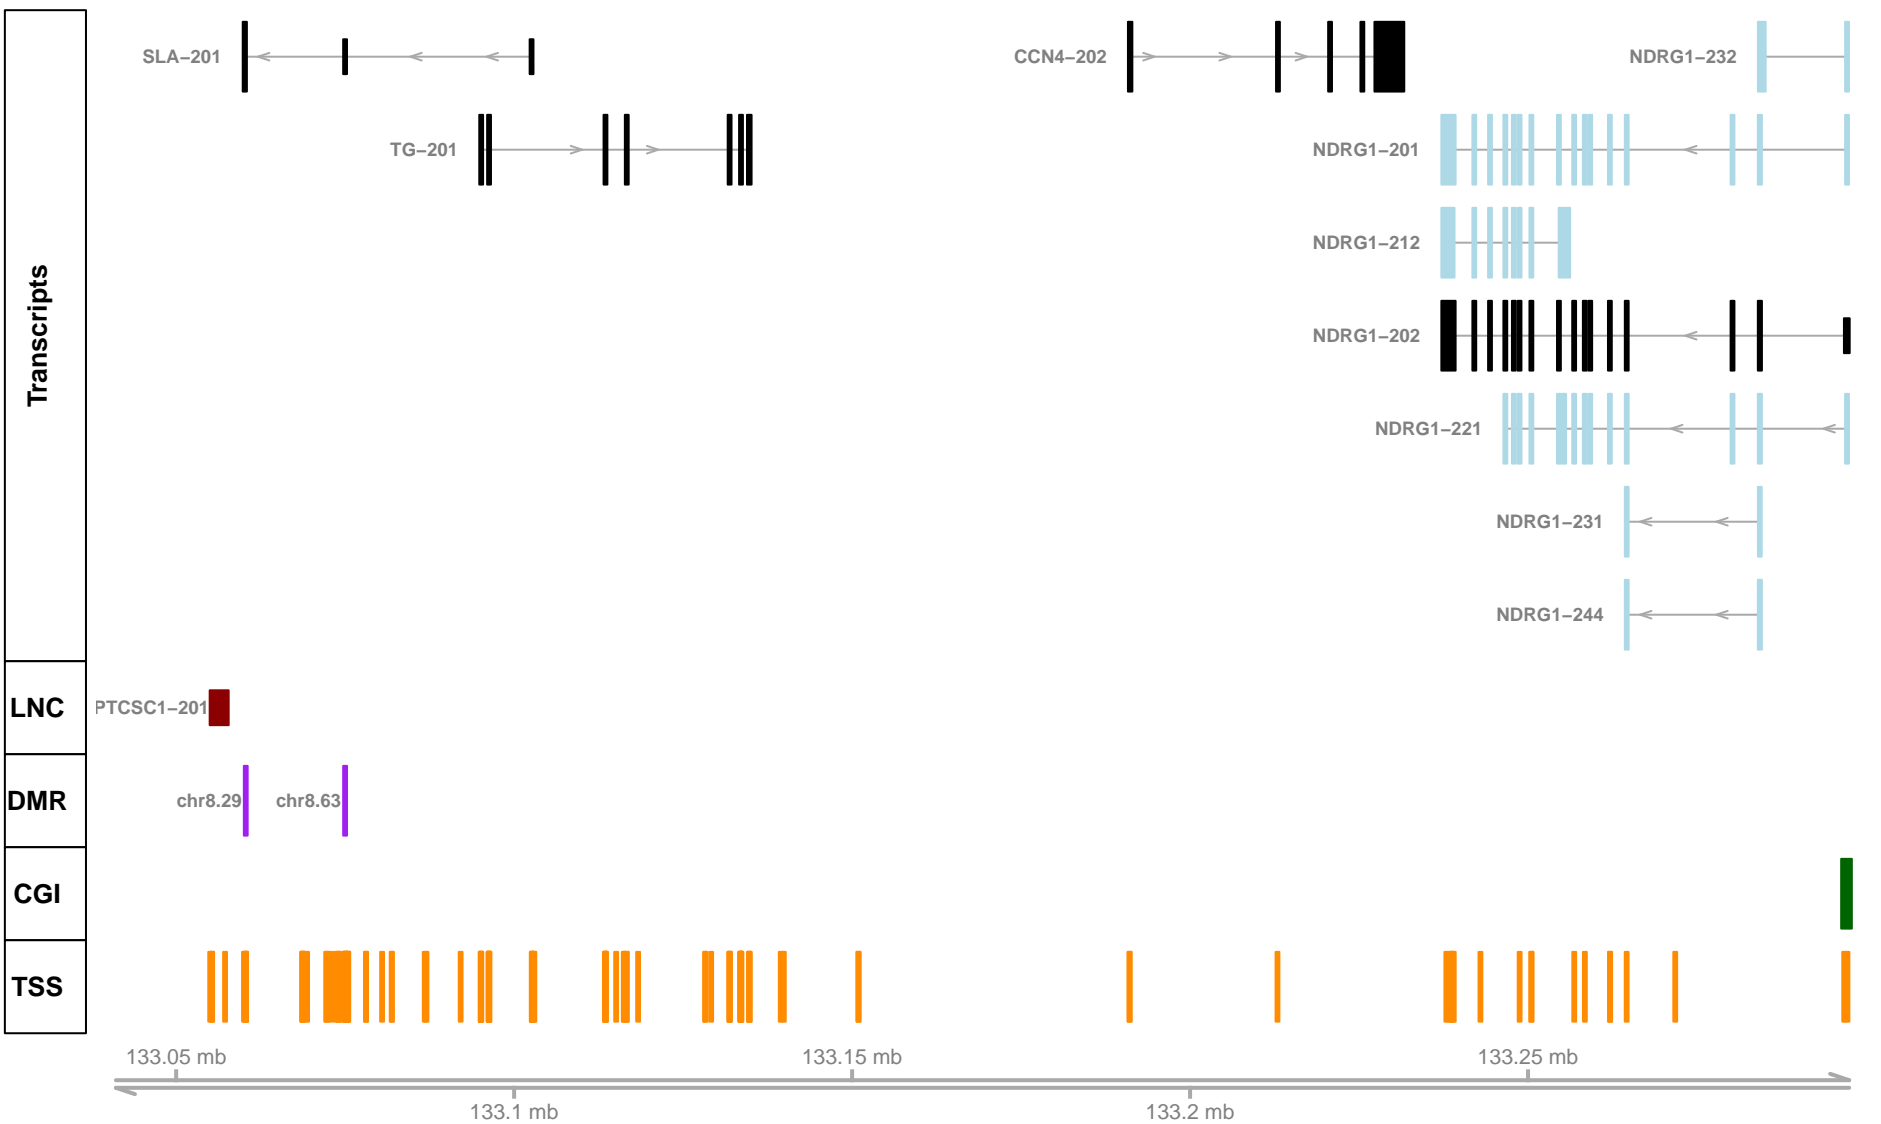

chr8.63

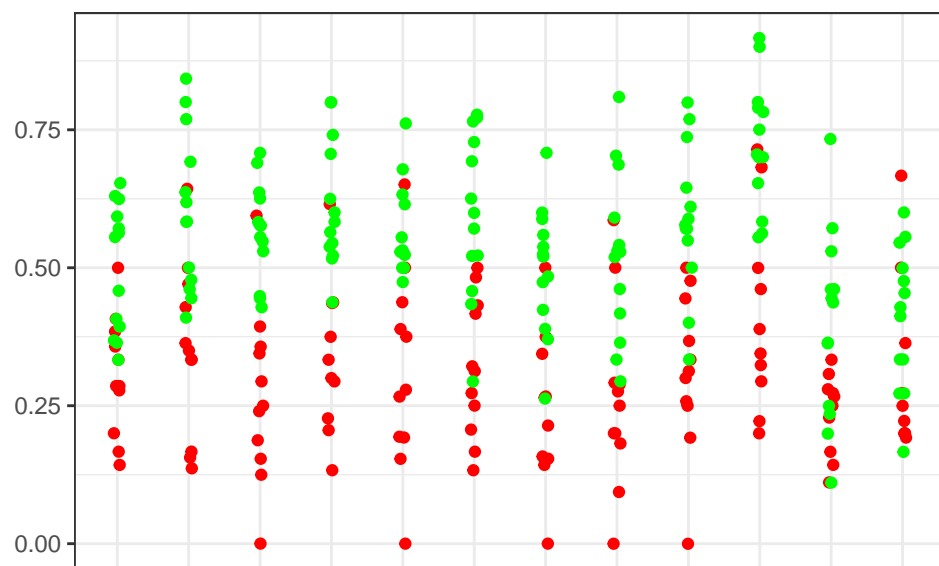

chr8.29

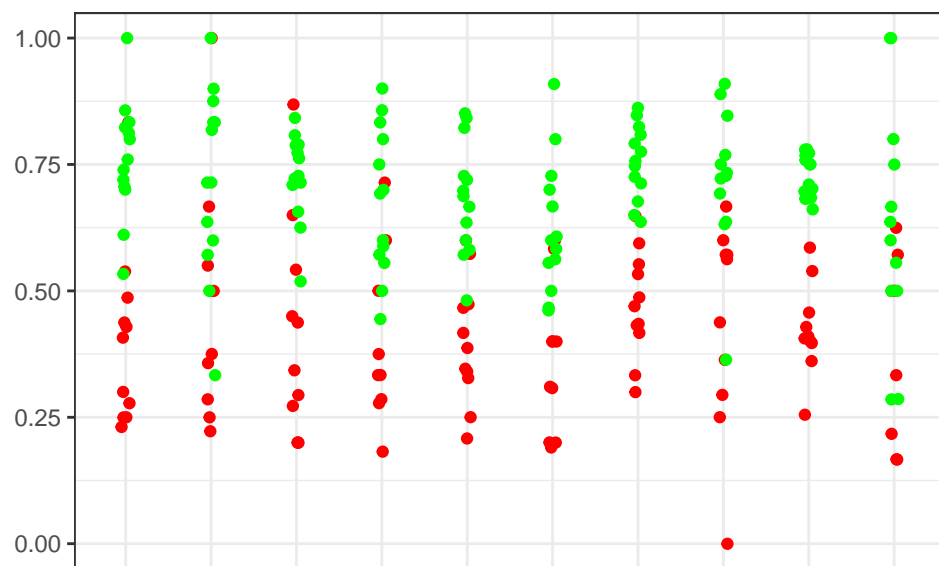

# SH3BP5-AS1

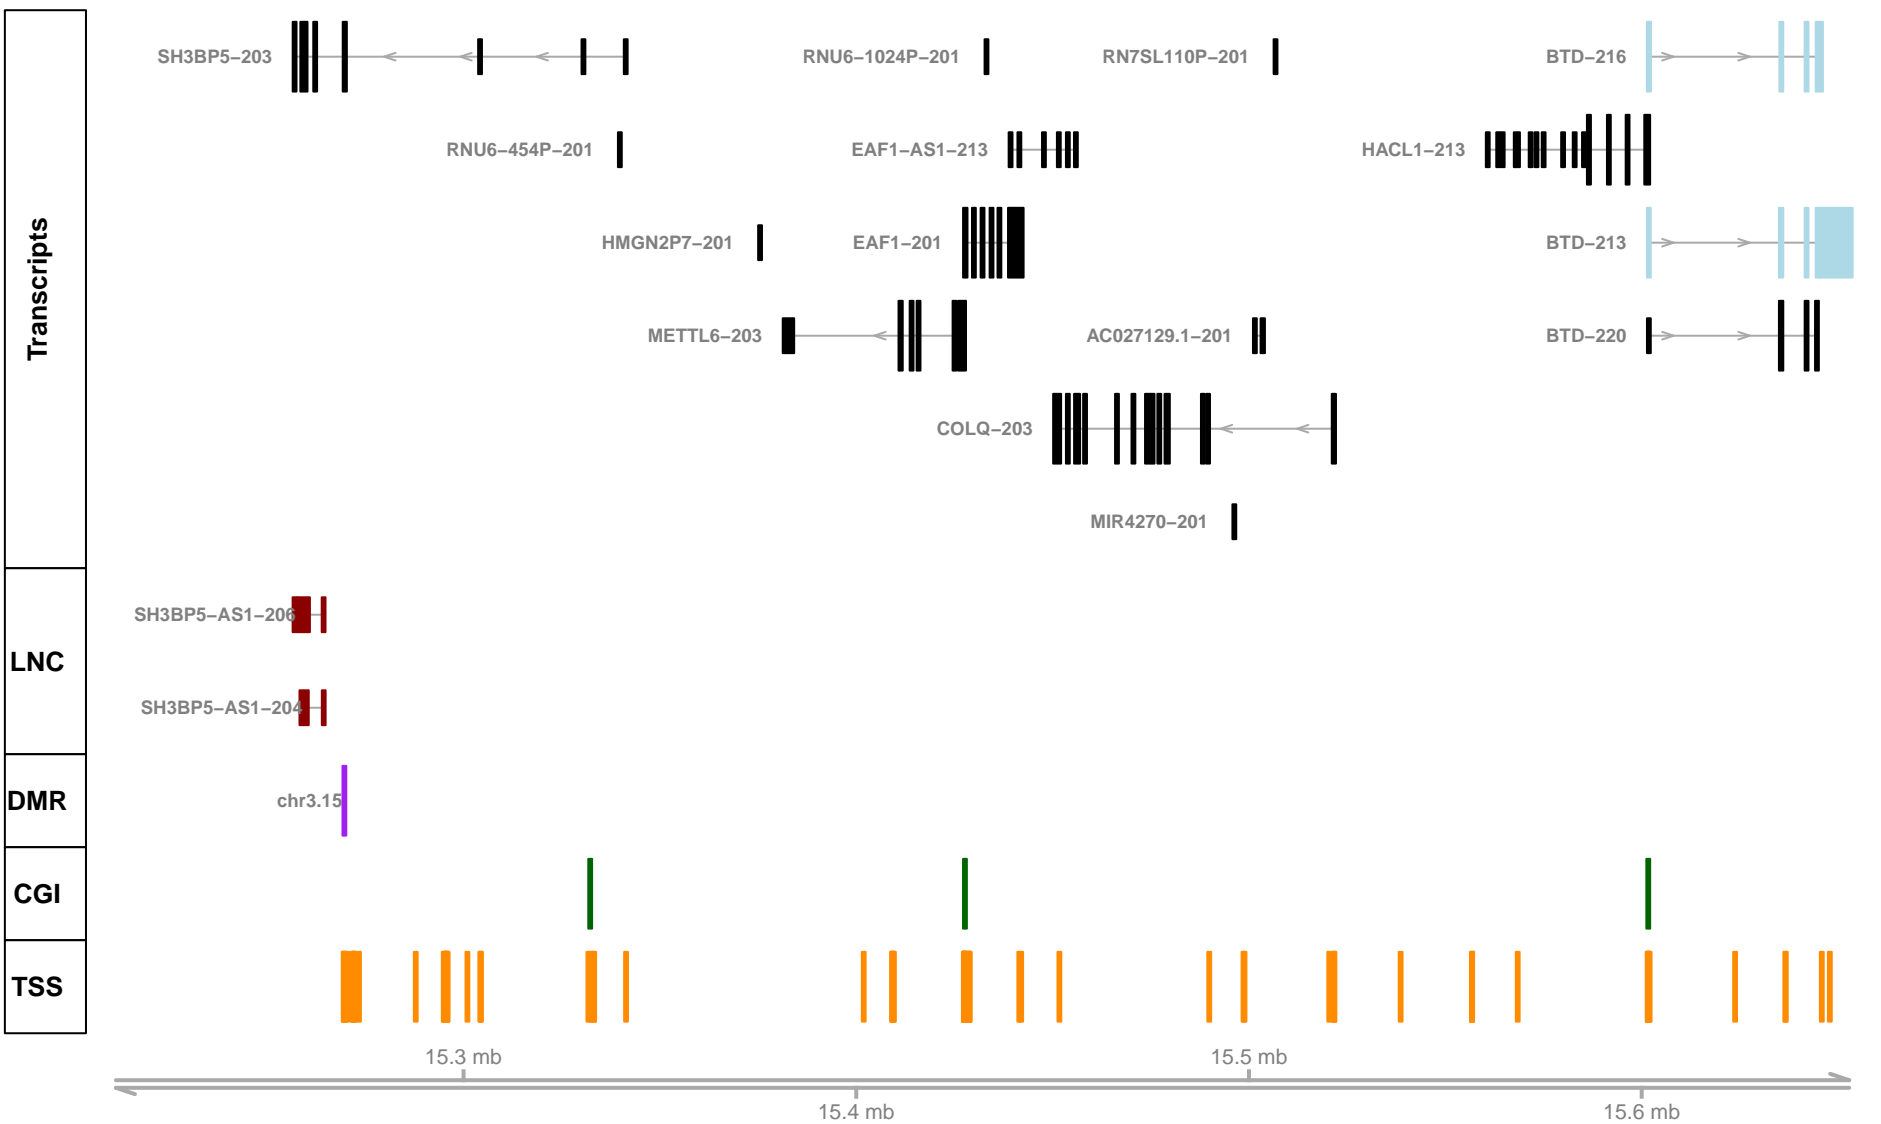

chr3.15

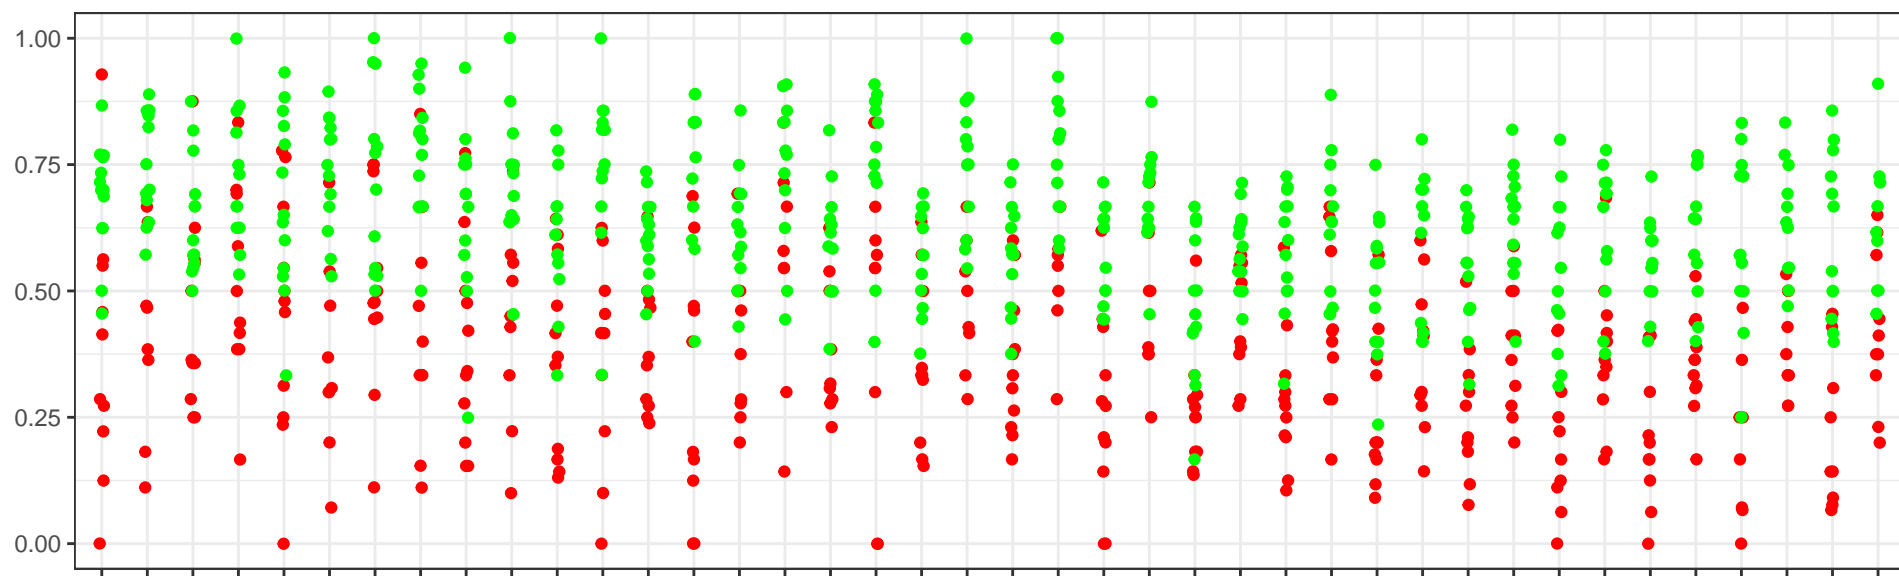

# SLC26A4-AS1

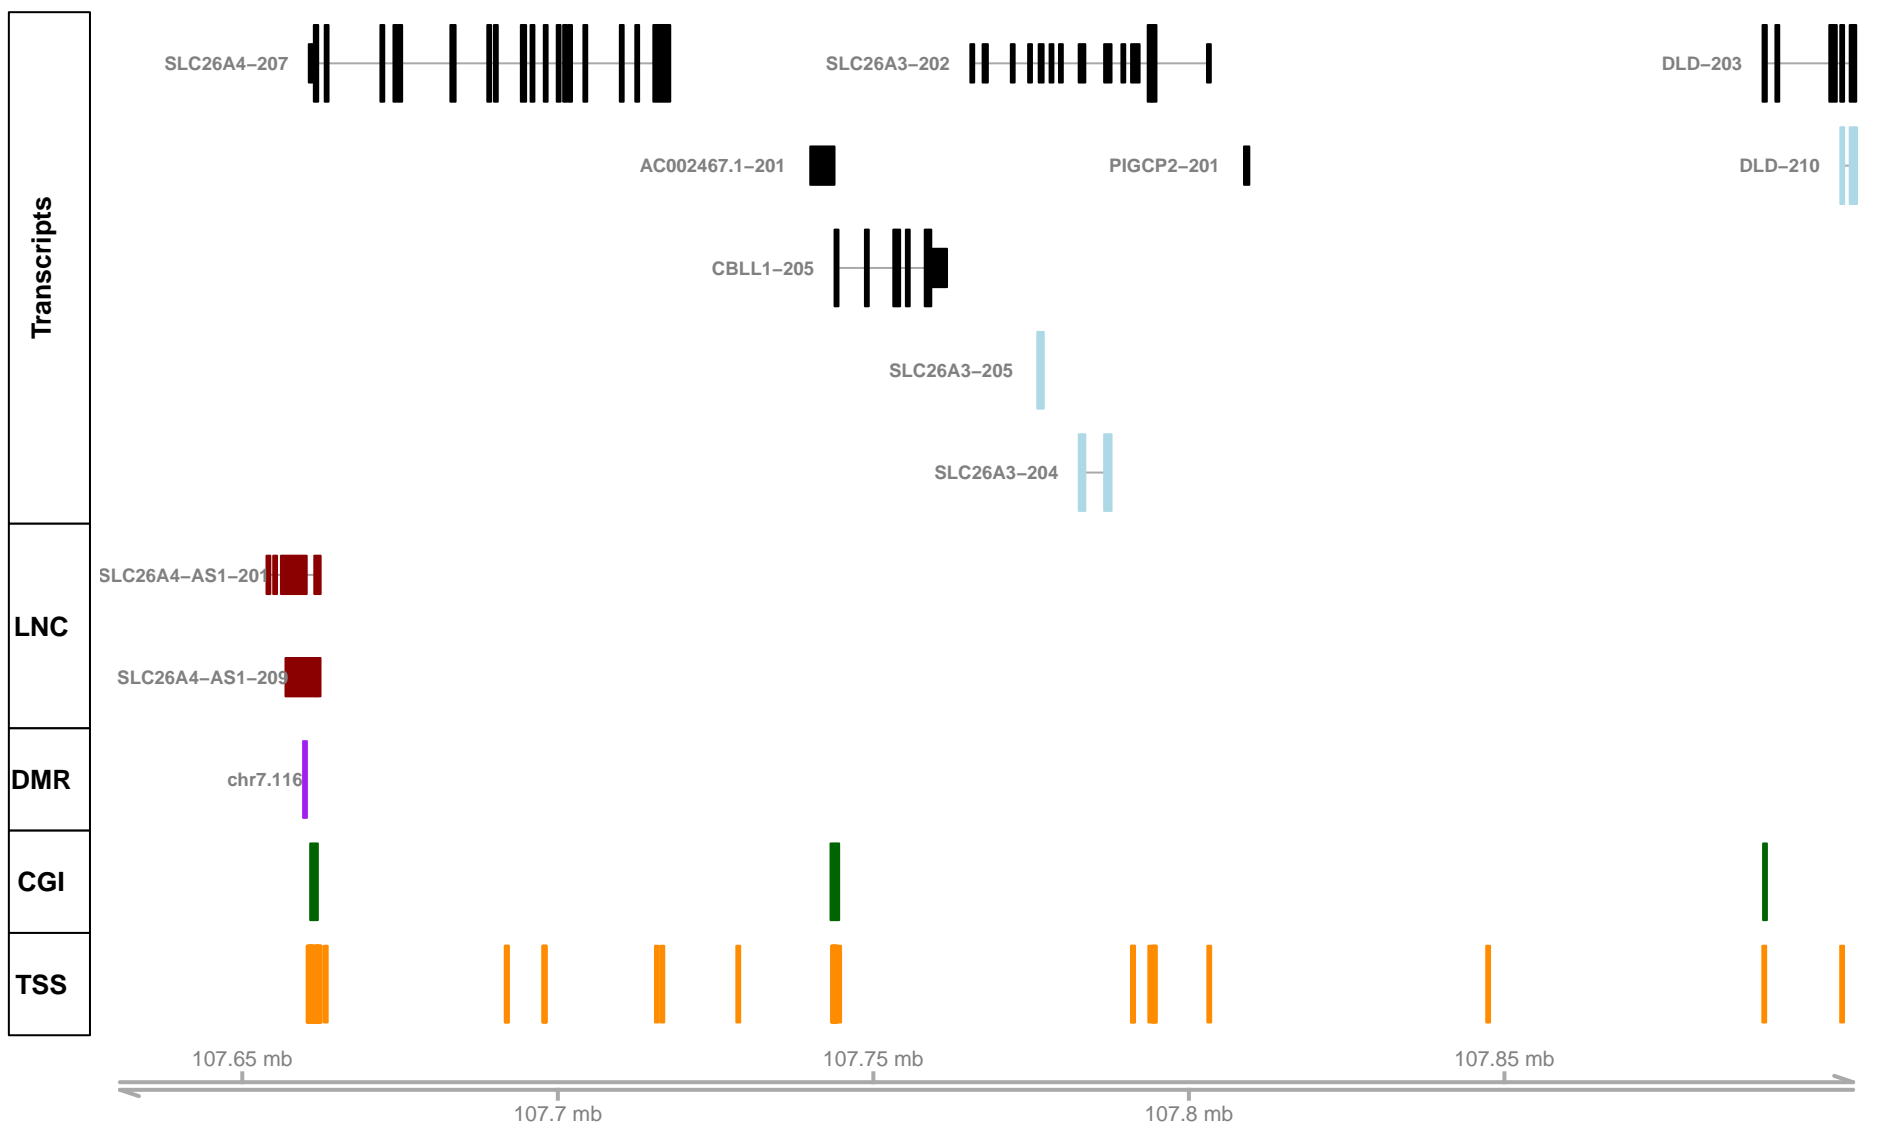

## chr7.116

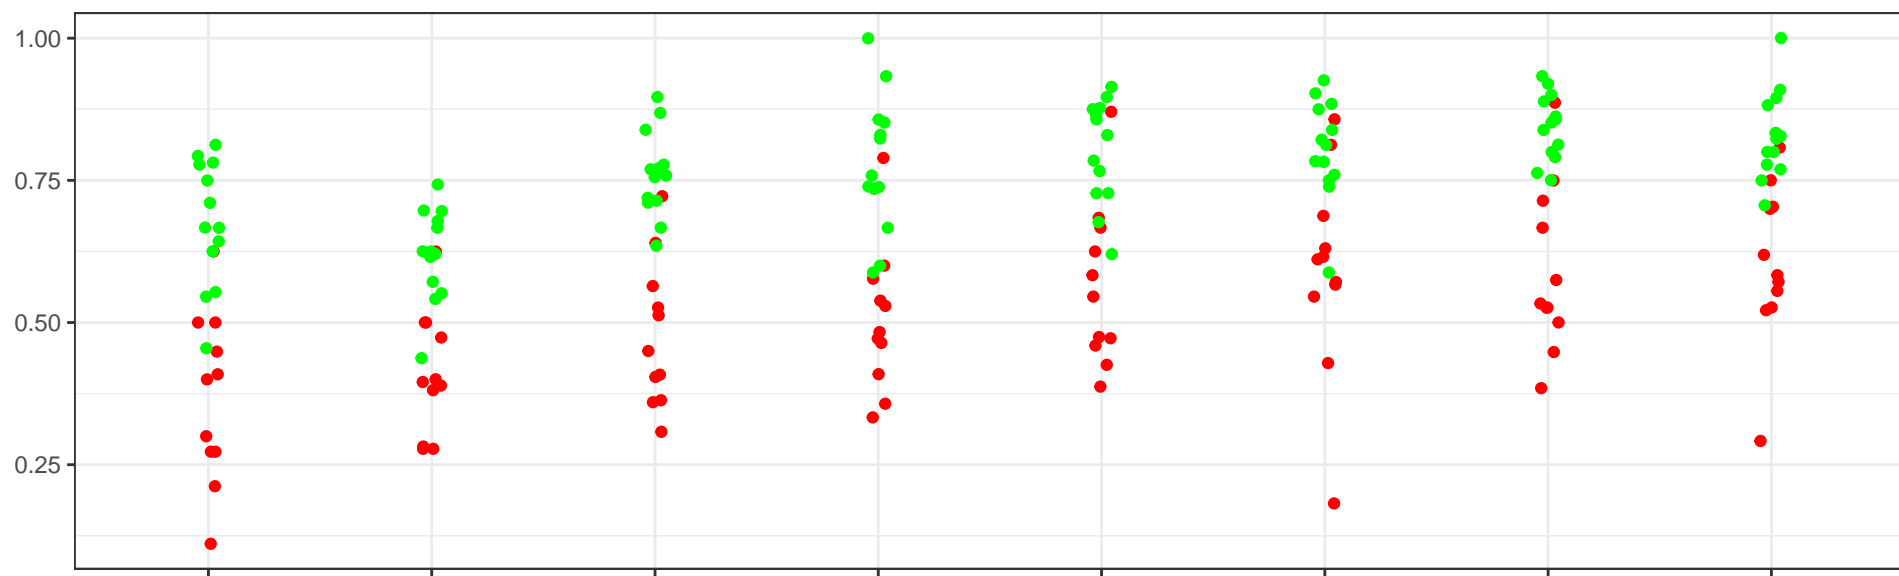

# SNHG15

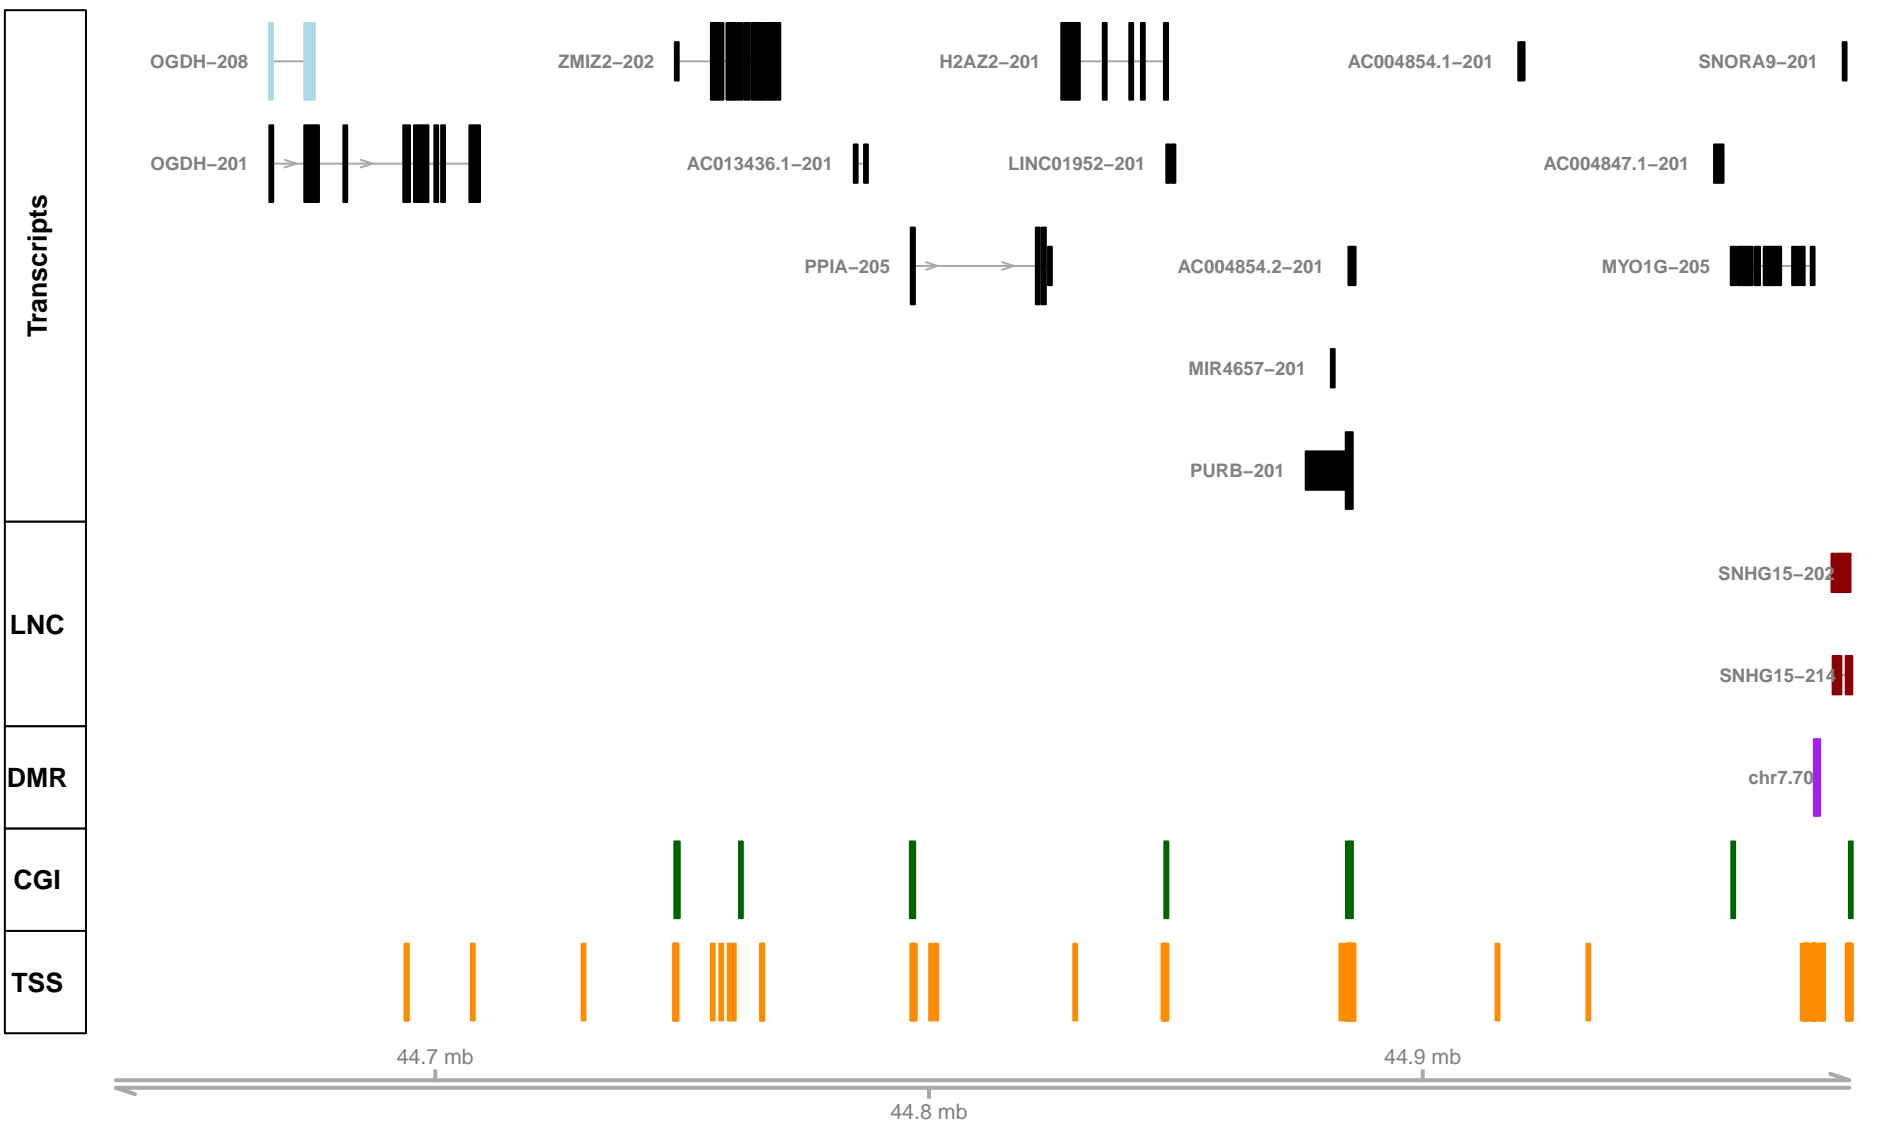

## chr7.70

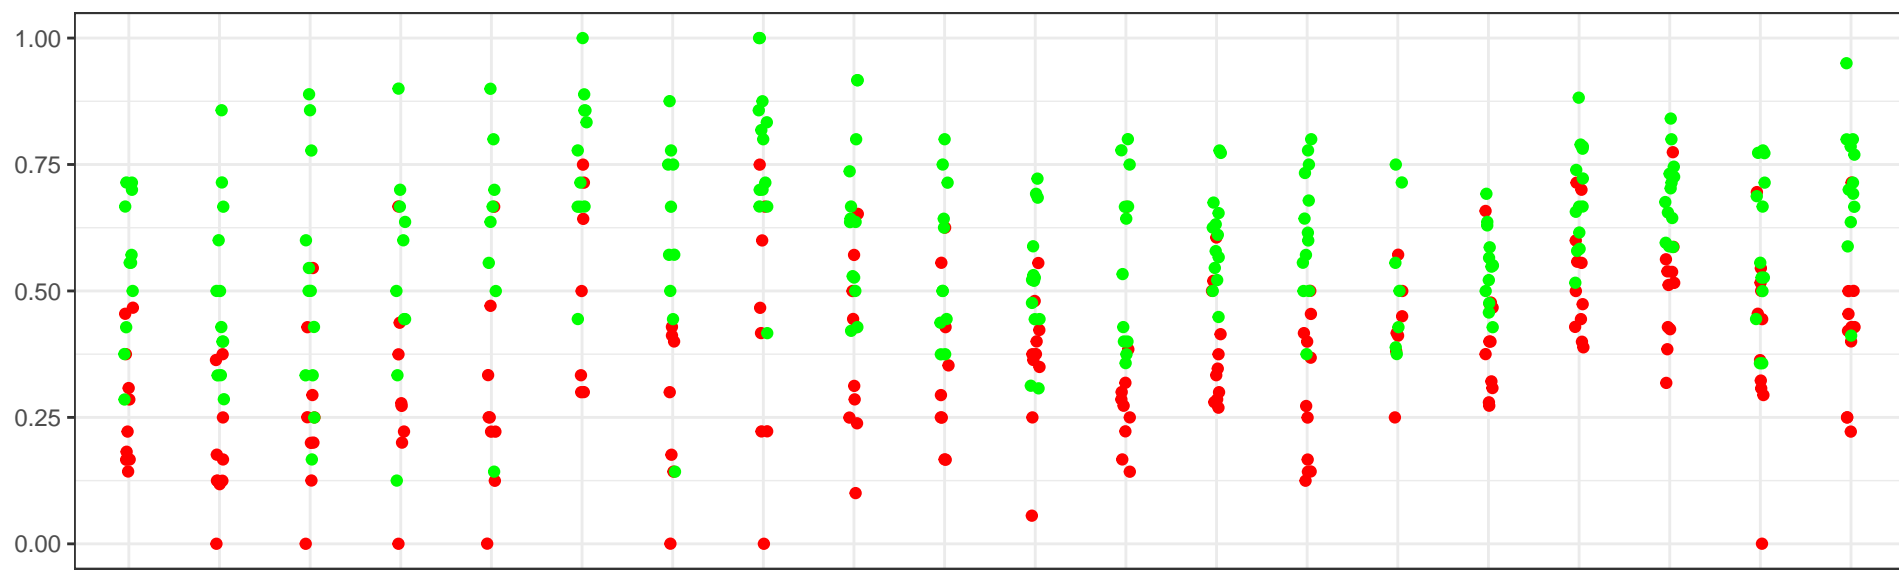

# TANK-AS1

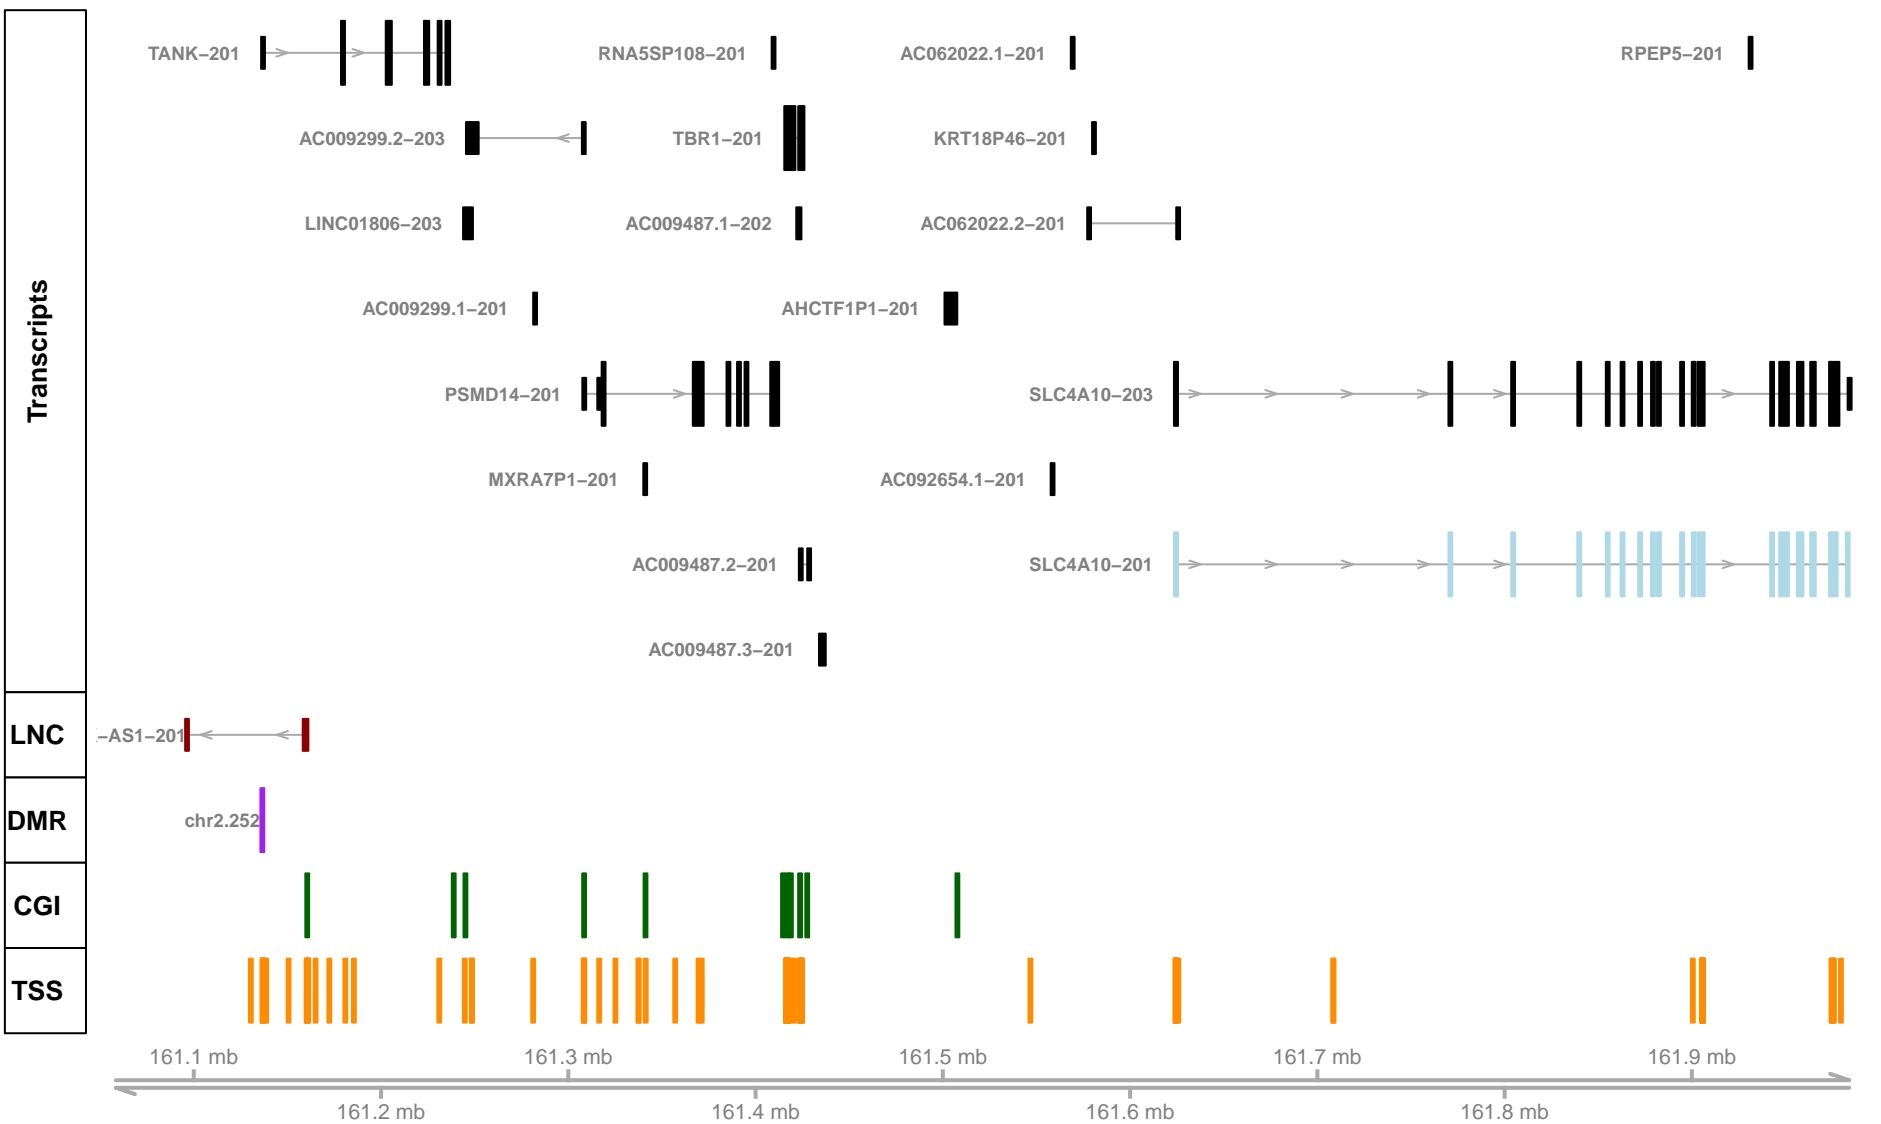

## chr2.252

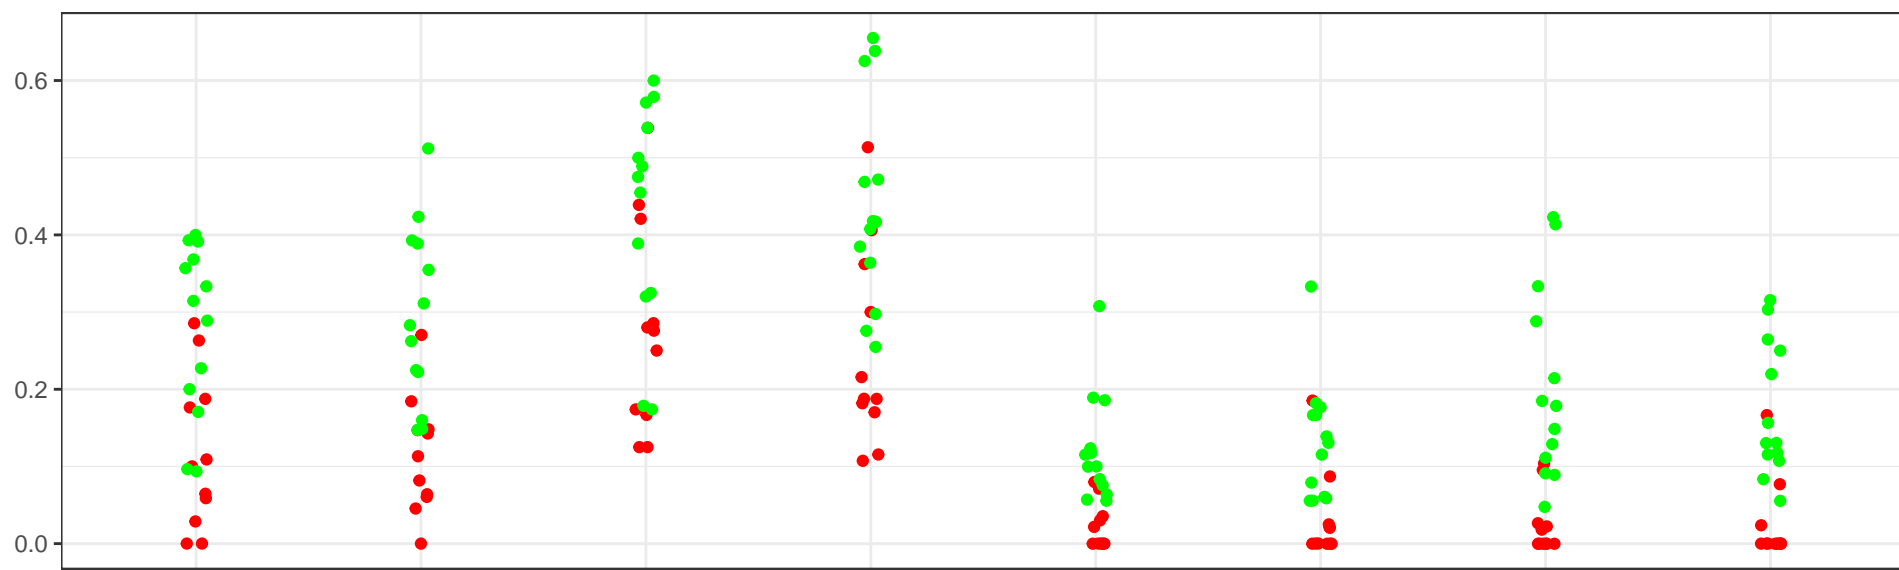

# TSPOAP1-AS1

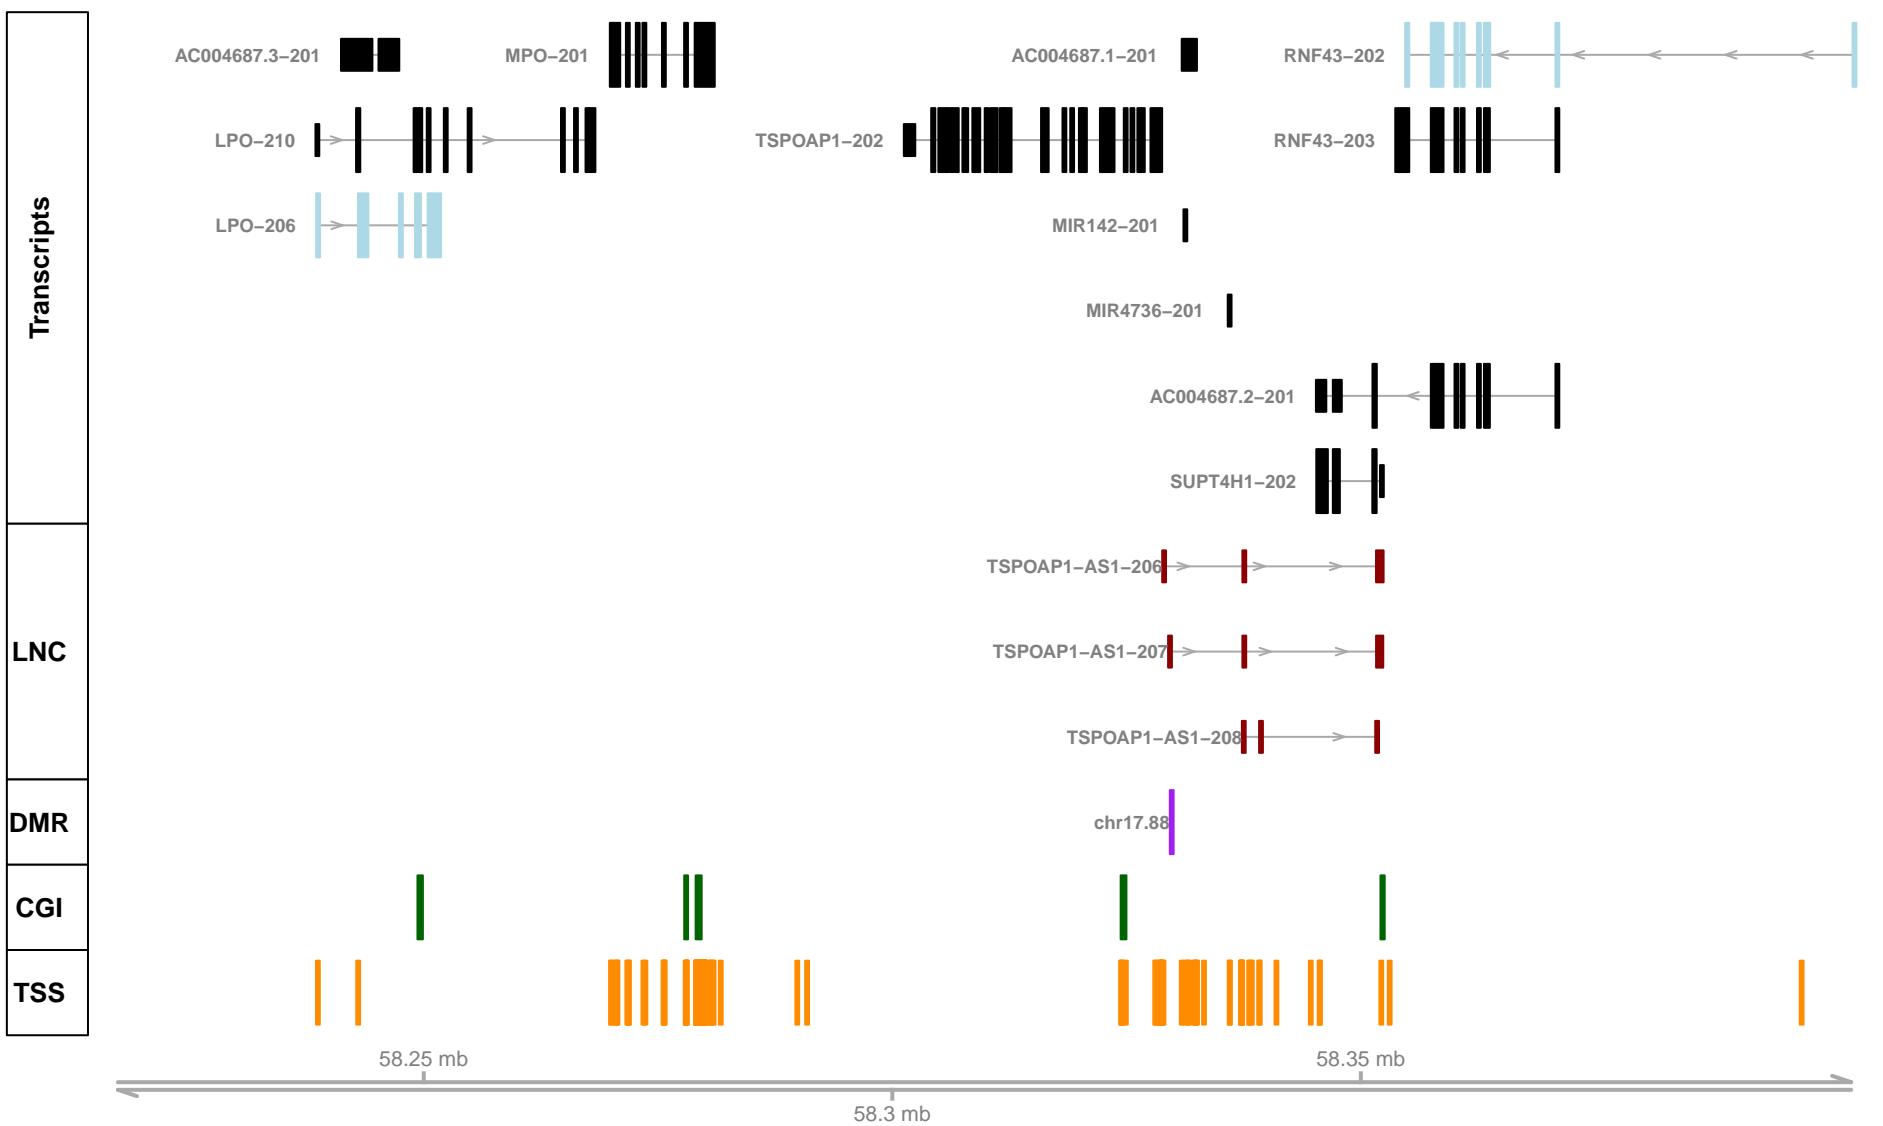

chr17.88

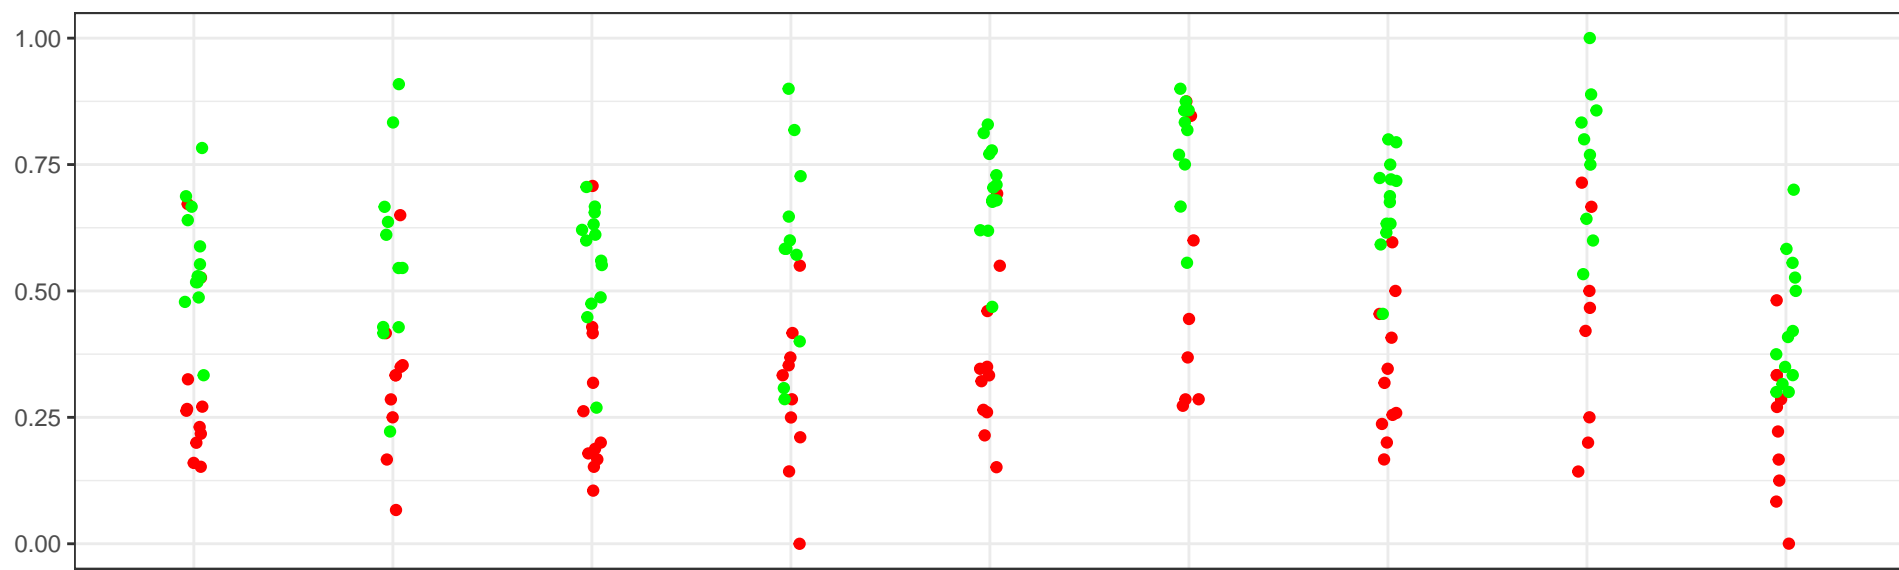

U62631.1

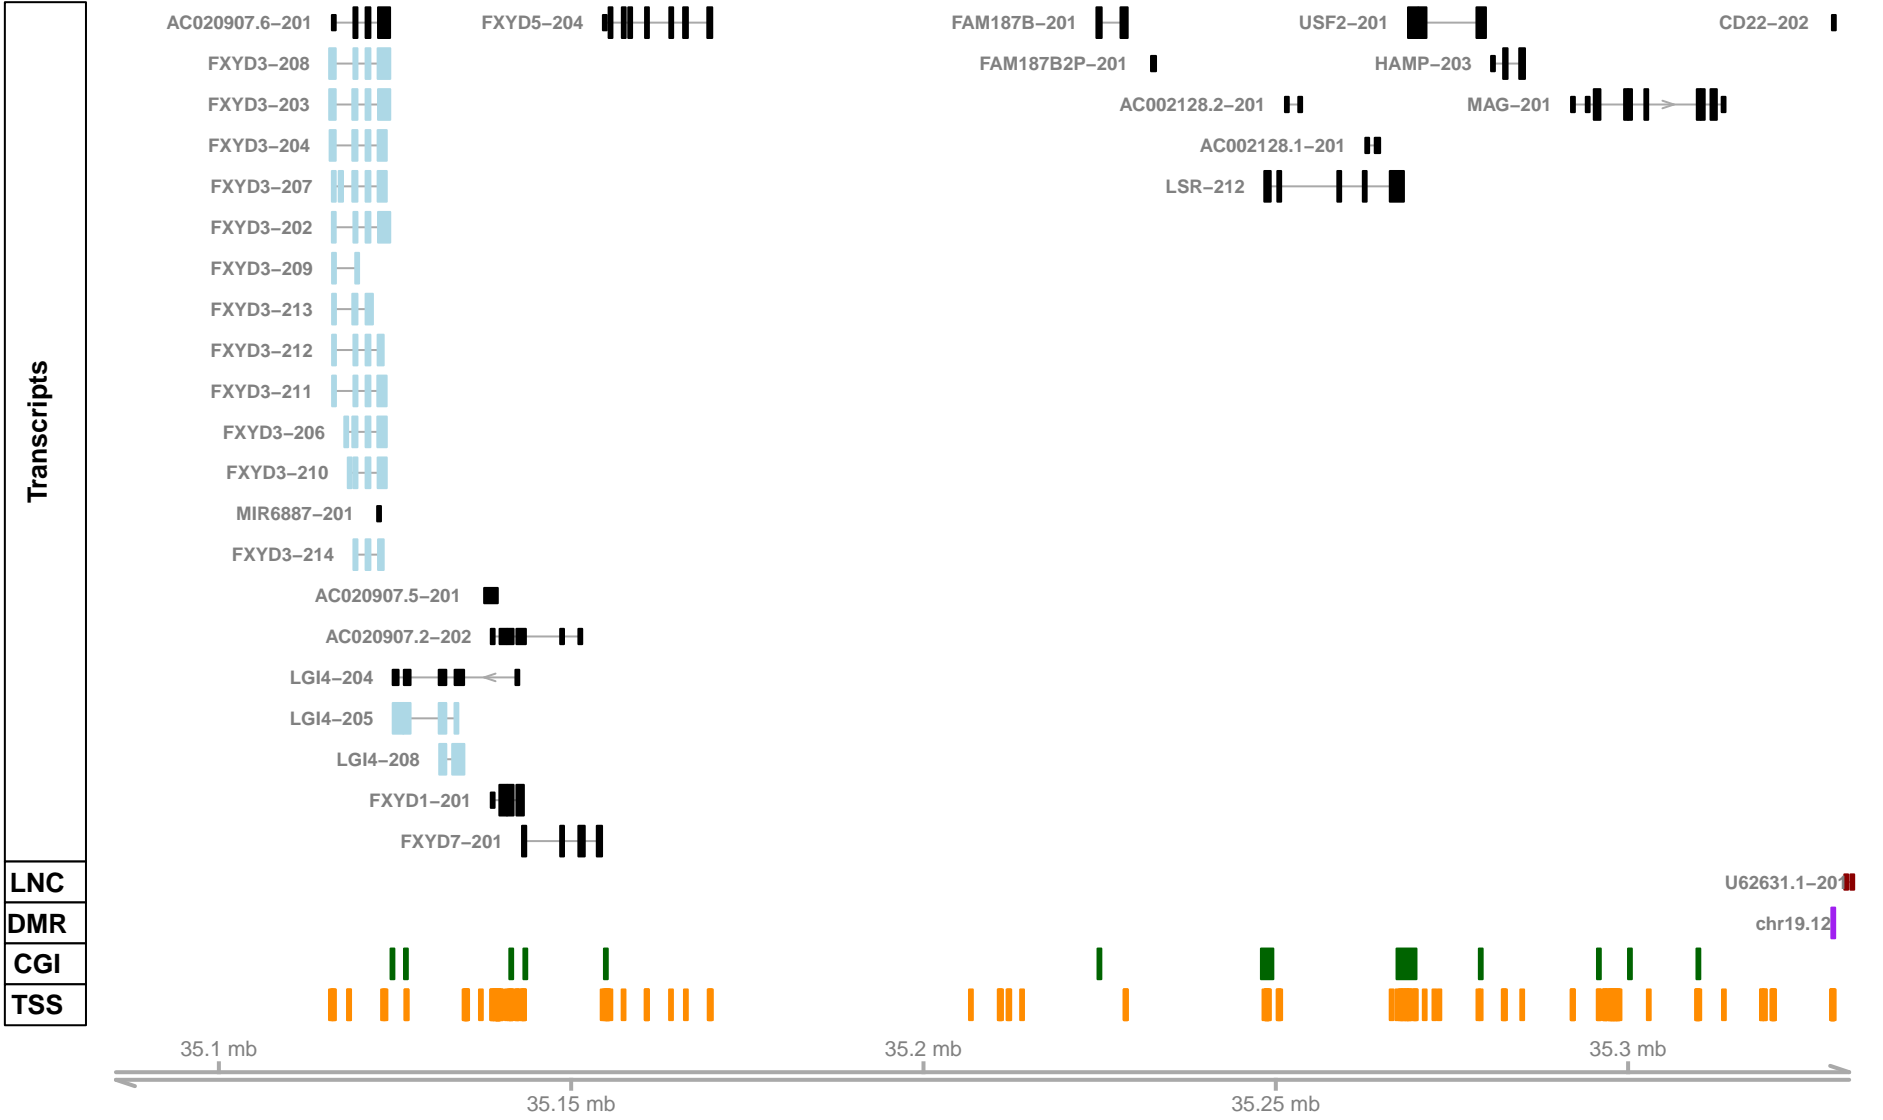

chr19.12

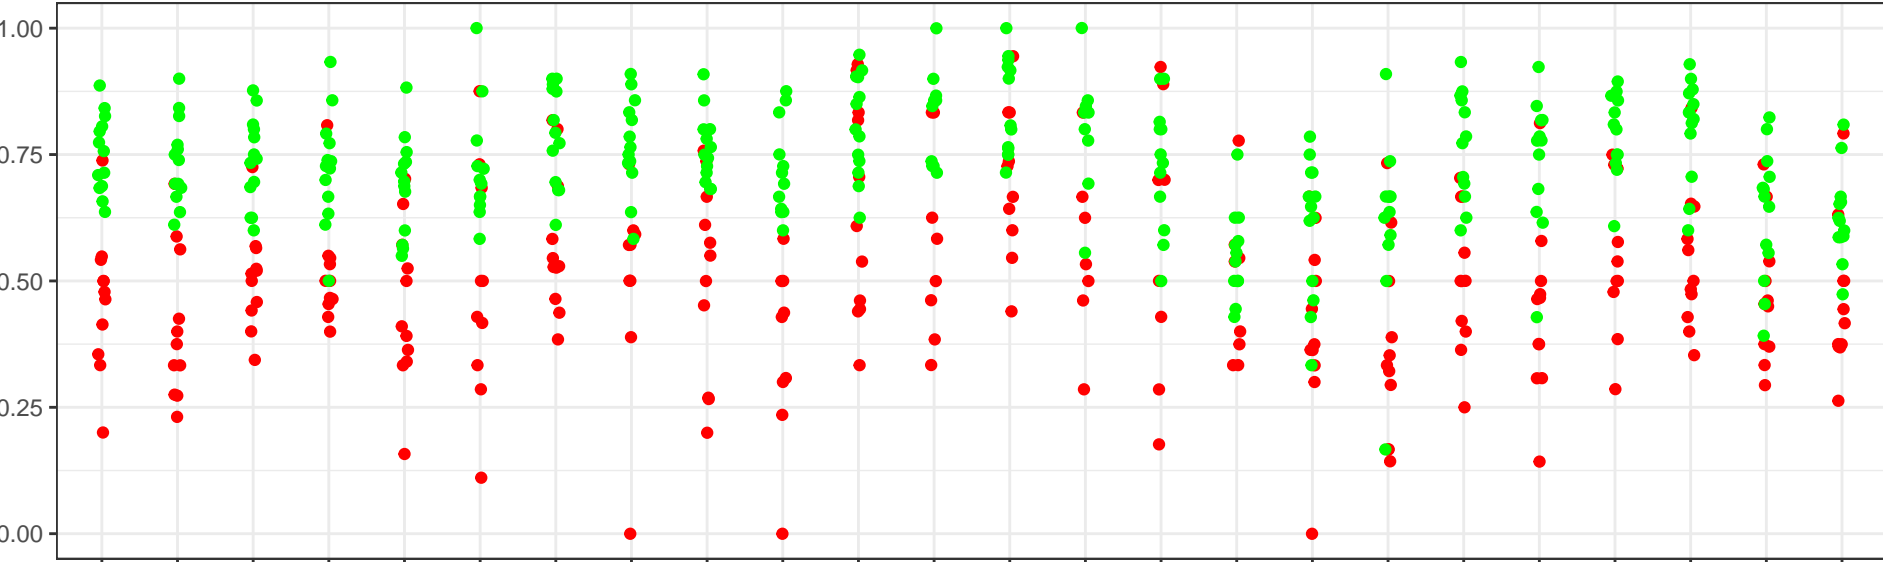

Z98257.1

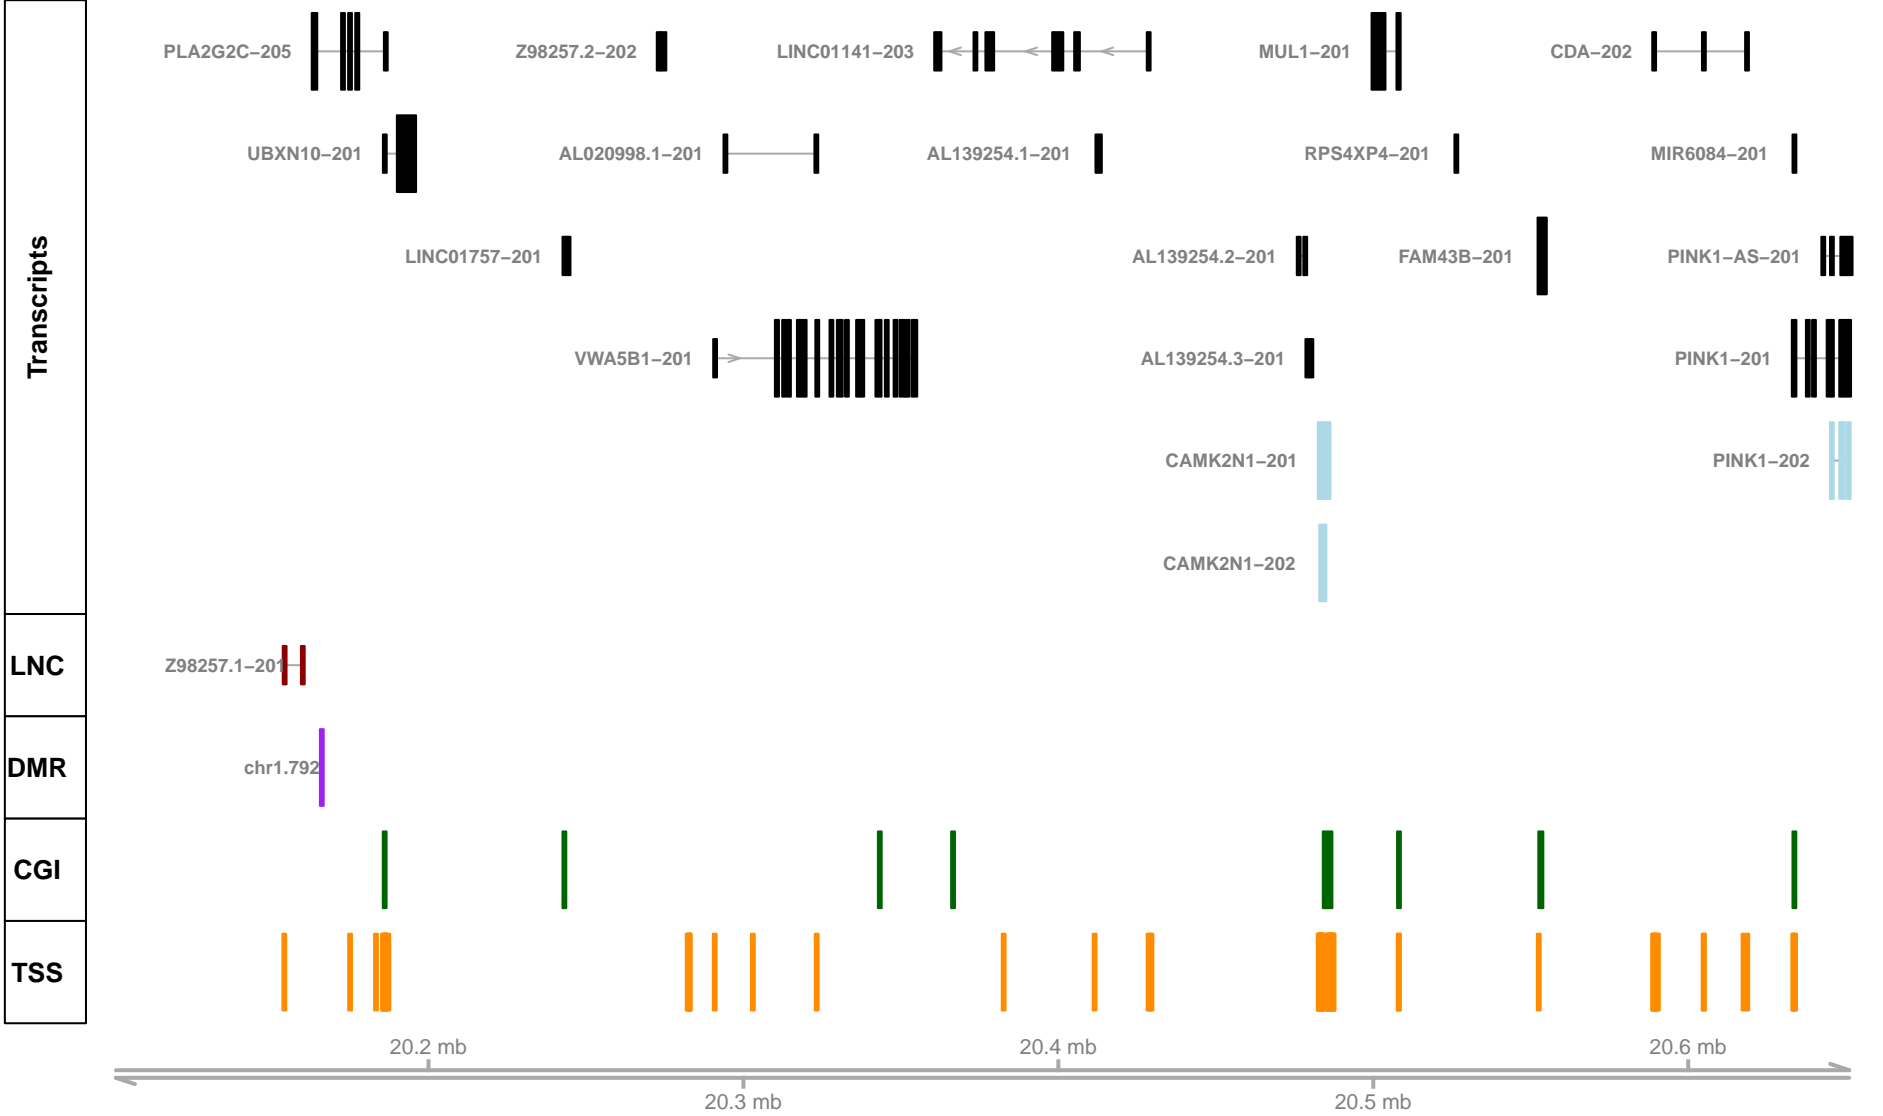

chr1.792

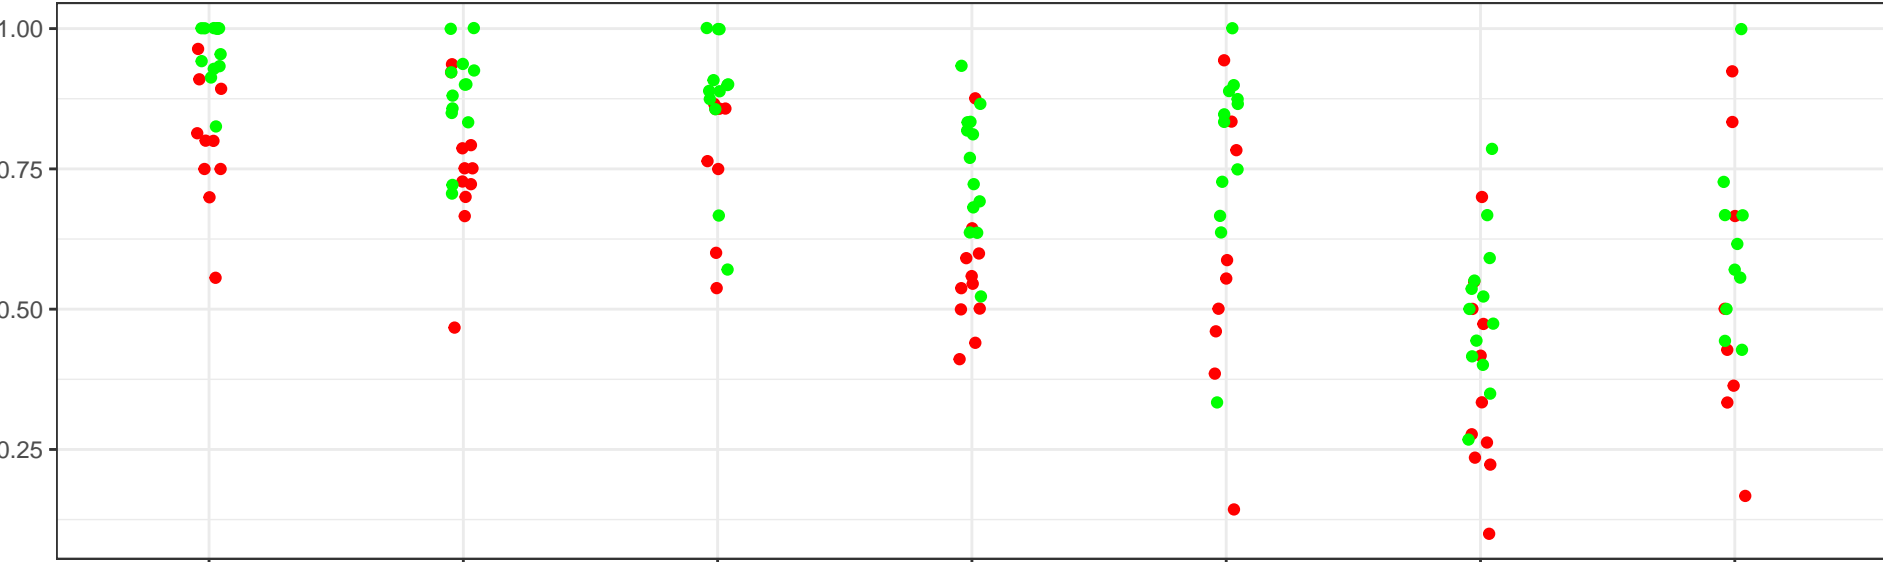

# ZFAS1

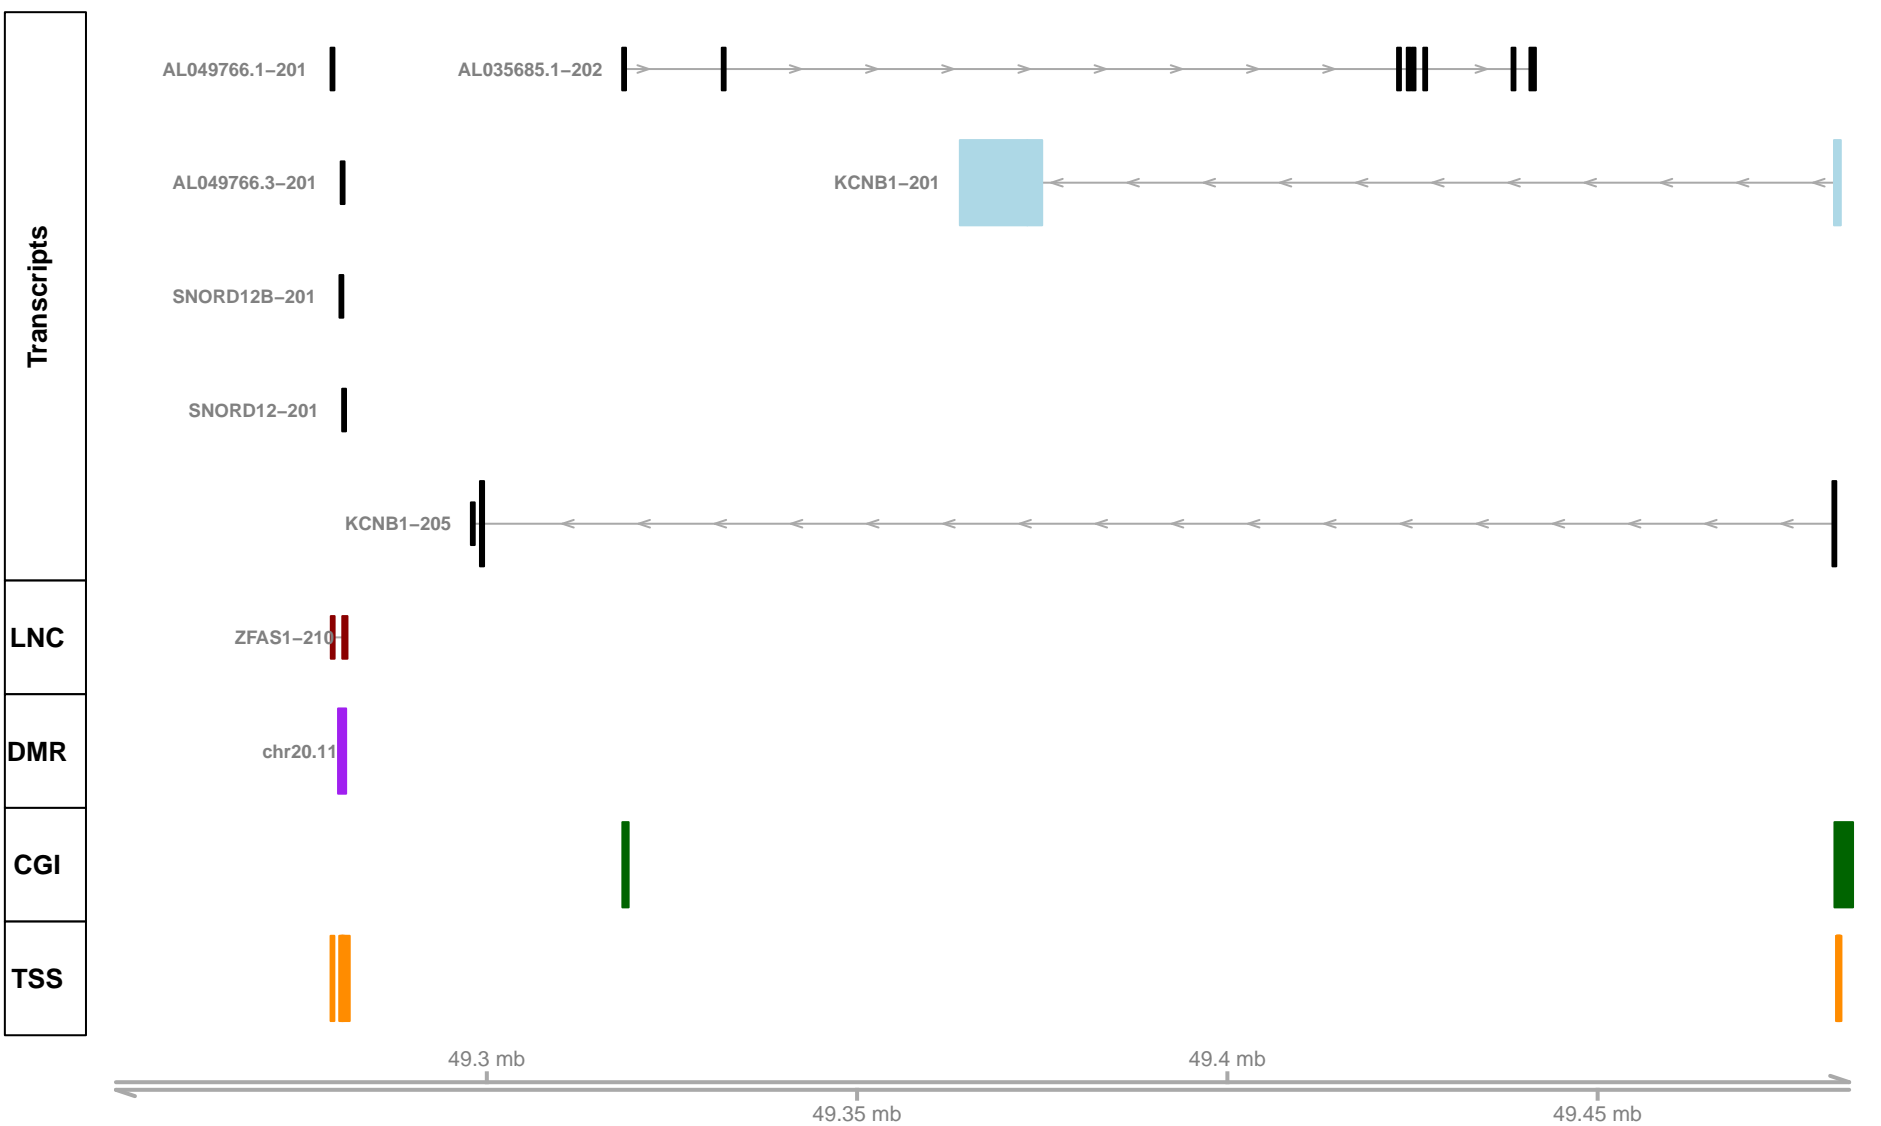

## chr20.11

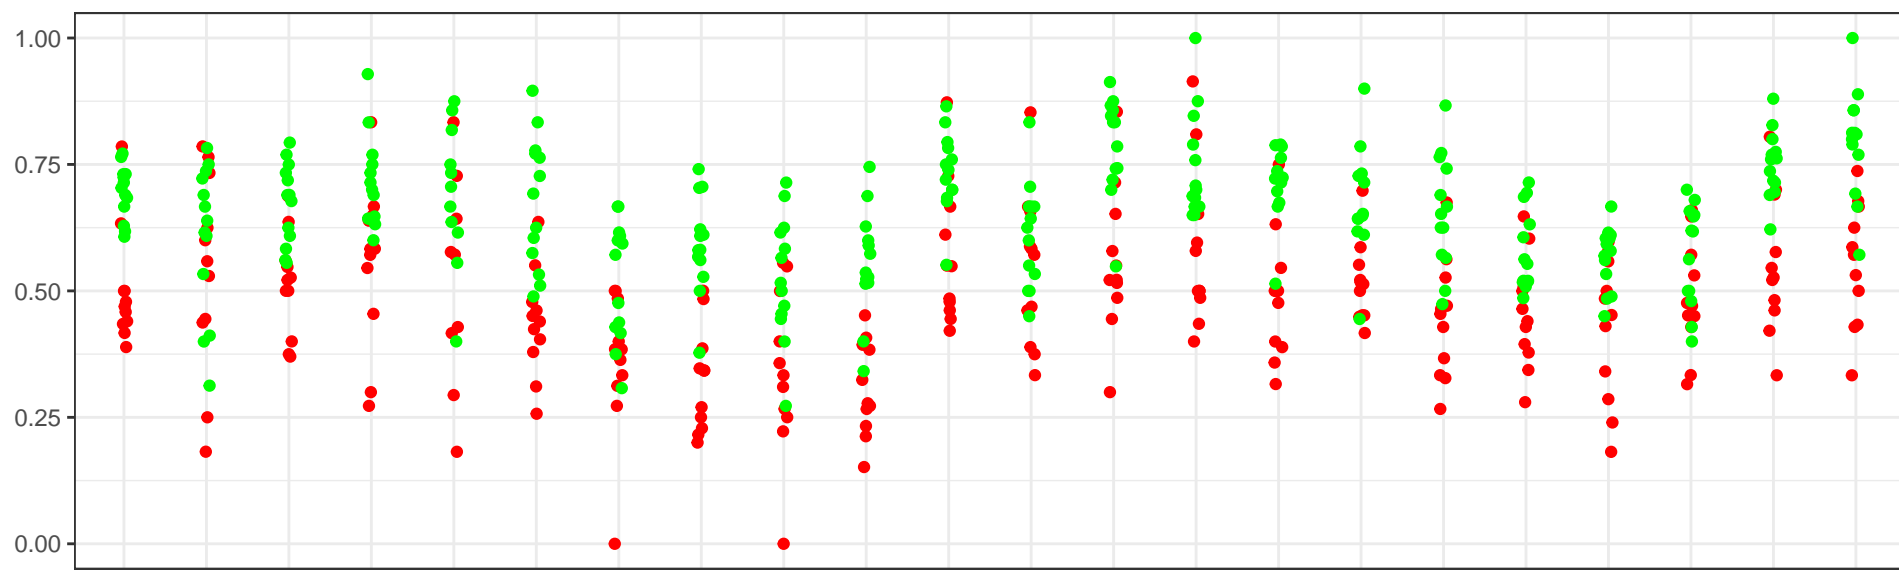

Supplement: s1 [file s1]
